# Supplementary material for: Model-based spatial-temporal mapping of opisthorchiasis in endemic countries of Southeast Asia
Source: eLife. 2021 Jan 12;10:e59755. doi: 10.7554/eLife.59755 (PMC7870142; doi:10.7554/eLife.59755)
Supplement: Figure 2—source data 1. [file elife-59755-fig2-data1.xlsx]

## Sheet: Source Data Table
DataID	Country	Title	Authors	Journal	YearOfPub	Volume	Issue	PageFrom	PageTo	SurveyType	DataCollectionMothod	MonthStart	MonthFinish	YearStart	YearFinish	ADM1	ADM2	ADM3	PointName	Datatype	Latitude	Longitude	GeoReferenceSources	Diagnostic	AgeLower	AgeUpper	NumExamine	NumPositive	PercentPositive (%)	MaxPercentPositive (%)	MinPercentPositive (%)	NumExamineMale	NumPositiveMale	PercentPositiveMale (%)	NumExamineFemale	NumPositiveFemale	PercentPositiveFemale (%)
1	Cambodia	Adult Opisthorchis viverrini flukes in humans, Takeo, Cambodia	Sohn WM, Shin EH, Yong TS, Eom KS, Jeong HG, Sinuon M, Socheat D, Chai JY	Emerging Infectious Diseases	2011	17	7	1302	1304	community	Cross-sectional study	May	May	2010	2010	Takeo Province	Prey Kabas District	_x0000__x0000__x0000__x0000__x0000__x0000__x0000__x0000__x0000__x0000__x0000__x0000__x0000__x0000__x0000__x0000__x0000__x0000__x0000__x0000__x0000__x0000__x0000__x0000__x0000__x0000__x0000__x0000__x0000__x0000__x0000__x0000__x0000__x0000__x0000__x0000__x0000__x0000__x0000__x0000__x0000__x0000__x0000__x0000__x0000__x0000__x0000__x0000__x0000__x0000__x0000__x0000__x0000__x0000__x0000__x0000__x0000_…	Ang Svay Chek, Kaw Poang, and Trartang Ang	Point	11.1063	104.941	google map	FECT			1993		32.4
2	Cambodia	Comparison of novel and standard diagnostic tools for the detection of Schistosoma mekongi infection in Lao People's Democratic Republic and Cambodia	Vonghachack Y, Sayasone S, Khieu V, Bergquist R, van Dam GJ, Hoekstra PT, Corstjens P, Nickel B, Marti H, Utzinger J, Muth S, Odermatt P	Infectious Diseases of Poverty	2017	6	1	127	_x0000__x0000__x0000__x0000__x0000__x0000_	community	Cross-sectional study	Feb	Apr	2016	2016	Kratié province	_x0000__x0000__x0000__x0000__x0000__x0000__x0000__x0000__x0000__x0000__x0000__x0000__x0000__x0000__x0000__x0000__x0000__x0000__x0000__x0000__x0000__x0000__x0000__x0000__x0000__x0000__x0000__x0000__x0000__x0000__x0000__x0000__x0000__x0000__x0000__x0000__x0000__x0000__x0000__x0000__x0000__x0000__x0000__x0000__x0000__x0000__x0000__x0000__x0000__x0000__x0000__x0000__x0000__x0000__x0000__x0000__x0000_	_x0000__x0000__x0000__x0000__x0000__x0000__x0000__x0000__x0000__x0000__x0000__x0000__x0000__x0000__x0000__x0000__x0000__x0000__x0000__x0000__x0000__x0000__x0000__x0000__x0000__x0000__x0000__x0000__x0000__x0000__x0000__x0000__x0000__x0000__x0000__x0000__x0000__x0000__x0000__x0000__x0000__x0000__x0000__x0000__x0000__x0000__x0000__x0000__x0000__x0000__x0000__x0000__x0000__x0000__x0000__x0000__x0000_…	Kbal Chuor and Sre Khoeurn	Point	12.6103	106.016	google map	Kato-Katz	≤9	≥51	196	27	13.8
3	Cambodia	Diagnosis, Treatment and Risk Factors of Strongyloides stercoralis in Schoolchildren in Cambodia	Khieu V, Schär F, Marti H, Sayasone S, Duong S, Muth S, Odermatt P	PLOS Neglected Tropical Diseases	2013	7	2	e2035	_x0000__x0000__x0000__x0000__x0000__x0000_	school-based	Cross-sectional study	Mar	Jun	2009	2009	Kandal province	Saang District	_x0000__x0000__x0000__x0000__x0000__x0000__x0000__x0000__x0000__x0000__x0000__x0000__x0000__x0000__x0000__x0000__x0000__x0000__x0000__x0000__x0000__x0000__x0000__x0000__x0000__x0000__x0000__x0000__x0000__x0000__x0000__x0000__x0000__x0000__x0000__x0000__x0000__x0000__x0000__x0000__x0000__x0000__x0000__x0000__x0000__x0000__x0000__x0000__x0000__x0000__x0000__x0000__x0000__x0000__x0000__x0000__x0000_…	four semi-rural villages (Ang,Roka, Koh Khel and Damrey Chhlang villages)	Point	11.2674	105.026	google map	Kato-Katz	6	>15	458	36	7.9
4	Cambodia	Field survey focused on Opisthorchis viverrini infection in five provinces of Cambodia	Miyamoto K, Kirinoki M, Matsuda H, Hayashi N, Chigusa Y, Sinuon M, Chuor CM, Kitikoon V	Parasitology International	2014	63	2	366	373	community	Cross-sectional study	Mar	Aug	2006	2012	Takeo	Prey Kabas	Char Commune	Ch2	Point	11.2077	104.915	google map	Kato-Katz	6		272		10.7
5	Cambodia	Field survey focused on Opisthorchis viverrini infection in five provinces of Cambodia	Miyamoto K, Kirinoki M, Matsuda H, Hayashi N, Chigusa Y, Sinuon M, Chuor CM, Kitikoon V	Parasitology International	2014	63	2	366	373	community	Cross-sectional study	Mar	Aug	2006	2012	Takeo	Prey Kabas	Char Commune	Ch1	Point	11.2077	104.915	google map	Kato-Katz	6		535		26.9
6	Cambodia	Field survey focused on Opisthorchis viverrini infection in five provinces of Cambodia	Miyamoto K, Kirinoki M, Matsuda H, Hayashi N, Chigusa Y, Sinuon M, Chuor CM, Kitikoon V	Parasitology International	2014	63	2	366	373	community	Cross-sectional study	Mar	Aug	2006	2012	Kandal	S'ang	Krang Yov Commune	KY1	Point	11.2736	104.929	google map	Kato-Katz	6		211		26.9
7	Cambodia	Field survey focused on Opisthorchis viverrini infection in five provinces of Cambodia	Miyamoto K, Kirinoki M, Matsuda H, Hayashi N, Chigusa Y, Sinuon M, Chuor CM, Kitikoon V	Parasitology International	2014	63	2	366	373	community	Cross-sectional study	Mar	Aug	2006	2012	Kandal	S'ang	Krang Yov Commune	KY2	Point	11.2736	104.929	google map	Kato-Katz	6		382		14
8	Cambodia	Field survey focused on Opisthorchis viverrini infection in five provinces of Cambodia	Miyamoto K, Kirinoki M, Matsuda H, Hayashi N, Chigusa Y, Sinuon M, Chuor CM, Kitikoon V	Parasitology International	2014	63	2	366	373	community	Cross-sectional study	Mar	Aug	2006	2012	Kampong Cham	Srei Santhor	Banteay Commune	Bt1	Point	11.8433	105.1	google map	Kato-Katz	6		165		28.5
9	Cambodia	Field survey focused on Opisthorchis viverrini infection in five provinces of Cambodia	Miyamoto K, Kirinoki M, Matsuda H, Hayashi N, Chigusa Y, Sinuon M, Chuor CM, Kitikoon V	Parasitology International	2014	63	2	366	373	community	Cross-sectional study	Mar	Aug	2006	2012	Kampong Tham	Baray	Tanaot Chum Commune	TC1	Point	11.8508	105.195	google map	Kato-Katz	6		183		48.6
10	Cambodia	Field survey focused on Opisthorchis viverrini infection in five provinces of Cambodia	Miyamoto K, Kirinoki M, Matsuda H, Hayashi N, Chigusa Y, Sinuon M, Chuor CM, Kitikoon V	Parasitology International	2014	63	2	366	373	community	Cross-sectional study	Mar	Aug	2006	2012	Kampong Cham	Kang Meas	Preaek Krabau Commune	PK1	Point	11.8515	105.332	google map	Kato-Katz	6		105		21
11	Cambodia	Field survey focused on Opisthorchis viverrini infection in five provinces of Cambodia	Miyamoto K, Kirinoki M, Matsuda H, Hayashi N, Chigusa Y, Sinuon M, Chuor CM, Kitikoon V	Parasitology International	2014	63	2	366	373	community	Cross-sectional study	Mar	Aug	2006	2012	Kampong Cham	Kang Meas	Reay Pay Commune	RP1	Point	11.9534	105.061	google map	Kato-Katz	6		74		29.7
12	Cambodia	Field survey focused on Opisthorchis viverrini infection in five provinces of Cambodia	Miyamoto K, Kirinoki M, Matsuda H, Hayashi N, Chigusa Y, Sinuon M, Chuor CM, Kitikoon V	Parasitology International	2014	63	2	366	373	community	Cross-sectional study	Mar	Aug	2006	2012	Kampong Cham	Kang Meas	Reay Pay Commune	RP2	Point	11.9534	105.061	google map	Kato-Katz	6		68		27.9
13	Cambodia	Field survey focused on Opisthorchis viverrini infection in five provinces of Cambodia	Miyamoto K, Kirinoki M, Matsuda H, Hayashi N, Chigusa Y, Sinuon M, Chuor CM, Kitikoon V	Parasitology International	2014	63	2	366	373	community	Cross-sectional study	Mar	Aug	2006	2012	Kampong Cham	Kang Meas	Reay Pay Commune	RP3	Point	11.9534	105.061	google map	Kato-Katz	6		71		11.3
14	Cambodia	Field survey focused on Opisthorchis viverrini infection in five provinces of Cambodia	Miyamoto K, Kirinoki M, Matsuda H, Hayashi N, Chigusa Y, Sinuon M, Chuor CM, Kitikoon V	Parasitology International	2014	63	2	366	373	community	Cross-sectional study	Mar	Aug	2006	2012	Kampong Cham	Kang Meas	Sour Kong Commune	SK1	Point	11.9746	105.134	google map	Kato-Katz	6		420		44.8
15	Cambodia	Field survey focused on Opisthorchis viverrini infection in five provinces of Cambodia	Miyamoto K, Kirinoki M, Matsuda H, Hayashi N, Chigusa Y, Sinuon M, Chuor CM, Kitikoon V	Parasitology International	2014	63	2	366	373	community	Cross-sectional study	Mar	Aug	2006	2012	Kampong Cham	Kang Meas	Sour Kong Commune	SK2	Point	11.9746	105.134	google map	Kato-Katz	6		305		23.3
16	Cambodia	Field survey focused on Opisthorchis viverrini infection in five provinces of Cambodia	Miyamoto K, Kirinoki M, Matsuda H, Hayashi N, Chigusa Y, Sinuon M, Chuor CM, Kitikoon V	Parasitology International	2014	63	2	366	373	community	Cross-sectional study	Mar	Aug	2006	2012	Kampong Cham	Kampong Cham	Sambuor Meas Commune	SM1	Point	11.9776	105.414	google map	Kato-Katz	6		360		29.2
17	Cambodia	Field survey focused on Opisthorchis viverrini infection in five provinces of Cambodia	Miyamoto K, Kirinoki M, Matsuda H, Hayashi N, Chigusa Y, Sinuon M, Chuor CM, Kitikoon V	Parasitology International	2014	63	2	366	373	community	Cross-sectional study	Mar	Aug	2006	2012	Kampong Cham	Kampong Siem	Srak Commune	Sr1	Point	12.0045	105.436	google map	Kato-Katz	6		126		65.1
18	Cambodia	Field survey focused on Opisthorchis viverrini infection in five provinces of Cambodia	Miyamoto K, Kirinoki M, Matsuda H, Hayashi N, Chigusa Y, Sinuon M, Chuor CM, Kitikoon V	Parasitology International	2014	63	2	366	373	community	Cross-sectional study	Mar	Aug	2006	2012	Kampong Tham	Santuk	Ti Pou Commune	TP1	Point	12.5664	105.051	google map	Kato-Katz	6		104		10.6
19	Cambodia	High prevalence of large trematode eggs in schoolchildren in Cambodia	Bless PJ, Schar F, Khieu V, Kramme S, Muth S, Marti H, Odermatt P	Acta Tropica	2015	141	Pt B	295	302	school-based	Cross-sectional study	May	Jun	2011	2011	Central Kandal	S’ang district	_x0000__x0000__x0000__x0000__x0000__x0000__x0000__x0000__x0000__x0000__x0000__x0000__x0000__x0000__x0000__x0000__x0000__x0000__x0000__x0000__x0000__x0000__x0000__x0000__x0000__x0000__x0000__x0000__x0000__x0000__x0000__x0000__x0000__x0000__x0000__x0000__x0000__x0000__x0000__x0000__x0000__x0000__x0000__x0000__x0000__x0000__x0000__x0000__x0000__x0000__x0000__x0000__x0000__x0000__x0000__x0000__x0000_…	Damrei Chhlang village primary school	Point	11.3579	104.989	google map	Combined (Kato-Katz & FECT)	5	18	228	13	5.7			116	5	4.3	112	8	7.1
20	Cambodia	High prevalence of Opisthorchis viverrini infection in a riparian population in Takeo Province, Cambodia	Yong TS, Shin EH, Chai JY, Sohn WM, Eom KS, Lee DM, Park K, Jeoung HG, Hoang EH, Lee YH, Woo HJ, Lee JH, Kang SI, Cha JK, Lee KH, Yoon CH, Sinuon M, Socheat D	The Korean journal of parasitology	2012	50	2	173	176	community	Cross-sectional study	May	May	2006	2010	Takeo Province	Prey Kabas District	_x0000__x0000__x0000__x0000__x0000__x0000__x0000__x0000__x0000__x0000__x0000__x0000__x0000__x0000__x0000__x0000__x0000__x0000__x0000__x0000__x0000__x0000__x0000__x0000__x0000__x0000__x0000__x0000__x0000__x0000__x0000__x0000__x0000__x0000__x0000__x0000__x0000__x0000__x0000__x0000__x0000__x0000__x0000__x0000__x0000__x0000__x0000__x0000__x0000__x0000__x0000__x0000__x0000__x0000__x0000__x0000__x0000_…	Ang Svay Chek area	Point	11.1063	104.941	google map	Kato-Katz	0	>60	1799	855	47.5			643	324	50.4	696	308	44.3
21	Cambodia	Intestinal helminthic infections in schoolchildren in Cambodia	Sinuon M, Anantaphruti MT, Socheat D	The Southeast Asian Journal of Tropical Medicine and Public Health	2003	34	2	254	258	school-based	Baseline of a follow-up treatment					Phnom Penh	Mean Chey District	Chbar Ampeou Commune	Chak Ang Re Leu	Point	11.5128	104.933	google map	Kato-Katz			118	0	0
22	Cambodia	Intestinal helminthic infections in schoolchildren in Cambodia	Sinuon M, Anantaphruti MT, Socheat D	The Southeast Asian Journal of Tropical Medicine and Public Health	2003	34	2	254	258	school-based	Baseline of a follow-up treatment					Phnom Penh	Mean Chey District	Chbar Ampeou Commune	Preah Ponlea	Point	11.5225	104.939	google map	Kato-Katz			112	0	0
23	Cambodia	Intestinal helminthic infections in schoolchildren in Cambodia	Sinuon M, Anantaphruti MT, Socheat D	The Southeast Asian Journal of Tropical Medicine and Public Health	2003	34	2	254	258	school-based	Baseline of a follow-up treatment					Phnom Penh	Mean Chey District	Beng Tumpon Commune	Sansamkosal	Point	11.5278	104.911	google map	Kato-Katz			143	0	0
24	Cambodia	Intestinal helminthic infections in schoolchildren in Cambodia	Sinuon M, Anantaphruti MT, Socheat D	The Southeast Asian Journal of Tropical Medicine and Public Health	2003	34	2	254	258	school-based	Baseline of a follow-up treatment					Phnom Penh	Mean Chey District	Chbar Ampeou Commune	Chbar Ampeou I	Point	11.5312	104.935	google map	Kato-Katz			123	0	0
25	Cambodia	Intestinal helminthic infections in schoolchildren in Cambodia	Sinuon M, Anantaphruti MT, Socheat D	The Southeast Asian Journal of Tropical Medicine and Public Health	2003	34	2	254	258	school-based	Baseline of a follow-up treatment					Phnom Penh	Mean Chey District	Chbar Ampeou Commune	Chbar Ampeou II	Point	11.5333	104.937	google map	Kato-Katz			105	0	0
26	Cambodia	Intestinal helminthic infections in schoolchildren in Cambodia	Sinuon M, Anantaphruti MT, Socheat D	The Southeast Asian Journal of Tropical Medicine and Public Health	2003	34	2	254	258	school-based	Baseline of a follow-up treatment					Phnom Penh	Mean Chey District	Chbar Ampeou Commune	Ressey Sras	Point	11.5338	104.941	google map	Kato-Katz			93	0	0
27	Cambodia	Intestinal helminthic infections in schoolchildren in Cambodia	Sinuon M, Anantaphruti MT, Socheat D	The Southeast Asian Journal of Tropical Medicine and Public Health	2003	34	2	254	258	school-based	Baseline of a follow-up treatment					Phnom Penh	Mean Chey District	Beng Tumpon Commune	Chamroeun Phal	Point	11.5412	104.904	google map	Kato-Katz			76	0	0
28	Cambodia	Intestinal helminthic infections in schoolchildren in Cambodia	Sinuon M, Anantaphruti MT, Socheat D	The Southeast Asian Journal of Tropical Medicine and Public Health	2003	34	2	254	258	school-based	Baseline of a follow-up treatment					Phnom Penh	Mean Chey District	Beng Tumpon Commune	Dambokpos	Point	11.5506	104.912	google map	Kato-Katz			95	0	0
29	Cambodia	Intestinal helminthic infections in schoolchildren in Cambodia	Sinuon M, Anantaphruti MT, Socheat D	The Southeast Asian Journal of Tropical Medicine and Public Health	2003	34	2	254	258	school-based	Baseline of a follow-up treatment					Kampong Chhnang Province	_x0000__x0000__x0000__x0000__x0000__x0000__x0000__x0000__x0000__x0000__x0000__x0000__x0000__x0000__x0000__x0000__x0000__x0000__x0000__x0000__x0000__x0000__x0000__x0000__x0000__x0000__x0000__x0000__x0000__x0000__x0000__x0000__x0000__x0000__x0000__x0000__x0000__x0000__x0000__x0000__x0000__x0000__x0000__x0000__x0000__x0000__x0000__x0000__x0000__x0000__x0000__x0000__x0000__x0000__x0000__x0000__x0000_	_x0000__x0000__x0000__x0000__x0000__x0000__x0000__x0000__x0000__x0000__x0000__x0000__x0000__x0000__x0000__x0000__x0000__x0000__x0000__x0000__x0000__x0000__x0000__x0000__x0000__x0000__x0000__x0000__x0000__x0000__x0000__x0000__x0000__x0000__x0000__x0000__x0000__x0000__x0000__x0000__x0000__x0000__x0000__x0000__x0000__x0000__x0000__x0000__x0000__x0000__x0000__x0000__x0000__x0000__x0000__x0000__x0000_…	Stung Chreou	Point	11.8727	104.747	google map	Kato-Katz			107	0	0
30	Cambodia	Intestinal helminthic infections in schoolchildren in Cambodia	Sinuon M, Anantaphruti MT, Socheat D	The Southeast Asian Journal of Tropical Medicine and Public Health	2003	34	2	254	258	school-based	Baseline of a follow-up treatment					Kampong Chhnang Province	_x0000__x0000__x0000__x0000__x0000__x0000__x0000__x0000__x0000__x0000__x0000__x0000__x0000__x0000__x0000__x0000__x0000__x0000__x0000__x0000__x0000__x0000__x0000__x0000__x0000__x0000__x0000__x0000__x0000__x0000__x0000__x0000__x0000__x0000__x0000__x0000__x0000__x0000__x0000__x0000__x0000__x0000__x0000__x0000__x0000__x0000__x0000__x0000__x0000__x0000__x0000__x0000__x0000__x0000__x0000__x0000__x0000_	_x0000__x0000__x0000__x0000__x0000__x0000__x0000__x0000__x0000__x0000__x0000__x0000__x0000__x0000__x0000__x0000__x0000__x0000__x0000__x0000__x0000__x0000__x0000__x0000__x0000__x0000__x0000__x0000__x0000__x0000__x0000__x0000__x0000__x0000__x0000__x0000__x0000__x0000__x0000__x0000__x0000__x0000__x0000__x0000__x0000__x0000__x0000__x0000__x0000__x0000__x0000__x0000__x0000__x0000__x0000__x0000__x0000_…	Koh Ressey	Point	11.931	104.708	google map	Kato-Katz			90	0	0
31	Cambodia	Intestinal helminthic infections in schoolchildren in Cambodia	Sinuon M, Anantaphruti MT, Socheat D	The Southeast Asian Journal of Tropical Medicine and Public Health	2003	34	2	254	258	school-based	Baseline of a follow-up treatment					Kampong Chhnang Province	_x0000__x0000__x0000__x0000__x0000__x0000__x0000__x0000__x0000__x0000__x0000__x0000__x0000__x0000__x0000__x0000__x0000__x0000__x0000__x0000__x0000__x0000__x0000__x0000__x0000__x0000__x0000__x0000__x0000__x0000__x0000__x0000__x0000__x0000__x0000__x0000__x0000__x0000__x0000__x0000__x0000__x0000__x0000__x0000__x0000__x0000__x0000__x0000__x0000__x0000__x0000__x0000__x0000__x0000__x0000__x0000__x0000_	_x0000__x0000__x0000__x0000__x0000__x0000__x0000__x0000__x0000__x0000__x0000__x0000__x0000__x0000__x0000__x0000__x0000__x0000__x0000__x0000__x0000__x0000__x0000__x0000__x0000__x0000__x0000__x0000__x0000__x0000__x0000__x0000__x0000__x0000__x0000__x0000__x0000__x0000__x0000__x0000__x0000__x0000__x0000__x0000__x0000__x0000__x0000__x0000__x0000__x0000__x0000__x0000__x0000__x0000__x0000__x0000__x0000_…	Koh Thom	Point	11.961	104.723	google map	Kato-Katz			93	0	0
32	Cambodia	Intestinal helminthic infections in schoolchildren in Cambodia	Sinuon M, Anantaphruti MT, Socheat D	The Southeast Asian Journal of Tropical Medicine and Public Health	2003	34	2	254	258	school-based	Baseline of a follow-up treatment					Province of Kratie	Snoul District	_x0000__x0000__x0000__x0000__x0000__x0000__x0000__x0000__x0000__x0000__x0000__x0000__x0000__x0000__x0000__x0000__x0000__x0000__x0000__x0000__x0000__x0000__x0000__x0000__x0000__x0000__x0000__x0000__x0000__x0000__x0000__x0000__x0000__x0000__x0000__x0000__x0000__x0000__x0000__x0000__x0000__x0000__x0000__x0000__x0000__x0000__x0000__x0000__x0000__x0000__x0000__x0000__x0000__x0000__x0000__x0000__x0000_…	Sre Char	Point	12.0216	106.404	google map	Kato-Katz			30	0	0
33	Cambodia	Intestinal helminthic infections in schoolchildren in Cambodia	Sinuon M, Anantaphruti MT, Socheat D	The Southeast Asian Journal of Tropical Medicine and Public Health	2003	34	2	254	258	school-based	Baseline of a follow-up treatment					Kampong Chhnang Province	_x0000__x0000__x0000__x0000__x0000__x0000__x0000__x0000__x0000__x0000__x0000__x0000__x0000__x0000__x0000__x0000__x0000__x0000__x0000__x0000__x0000__x0000__x0000__x0000__x0000__x0000__x0000__x0000__x0000__x0000__x0000__x0000__x0000__x0000__x0000__x0000__x0000__x0000__x0000__x0000__x0000__x0000__x0000__x0000__x0000__x0000__x0000__x0000__x0000__x0000__x0000__x0000__x0000__x0000__x0000__x0000__x0000_	_x0000__x0000__x0000__x0000__x0000__x0000__x0000__x0000__x0000__x0000__x0000__x0000__x0000__x0000__x0000__x0000__x0000__x0000__x0000__x0000__x0000__x0000__x0000__x0000__x0000__x0000__x0000__x0000__x0000__x0000__x0000__x0000__x0000__x0000__x0000__x0000__x0000__x0000__x0000__x0000__x0000__x0000__x0000__x0000__x0000__x0000__x0000__x0000__x0000__x0000__x0000__x0000__x0000__x0000__x0000__x0000__x0000_…	Koh Tkeou	Point	12.0306	104.698	google map	Kato-Katz			93	0	0
34	Cambodia	Intestinal helminthic infections in schoolchildren in Cambodia	Sinuon M, Anantaphruti MT, Socheat D	The Southeast Asian Journal of Tropical Medicine and Public Health	2003	34	2	254	258	school-based	Baseline of a follow-up treatment					Province of Kratie	Snoul District	_x0000__x0000__x0000__x0000__x0000__x0000__x0000__x0000__x0000__x0000__x0000__x0000__x0000__x0000__x0000__x0000__x0000__x0000__x0000__x0000__x0000__x0000__x0000__x0000__x0000__x0000__x0000__x0000__x0000__x0000__x0000__x0000__x0000__x0000__x0000__x0000__x0000__x0000__x0000__x0000__x0000__x0000__x0000__x0000__x0000__x0000__x0000__x0000__x0000__x0000__x0000__x0000__x0000__x0000__x0000__x0000__x0000_…	Rubber Plantation 2 Dec	Point	12.046	106.389	google map	Kato-Katz			101	0	0
35	Cambodia	Intestinal helminthic infections in schoolchildren in Cambodia	Sinuon M, Anantaphruti MT, Socheat D	The Southeast Asian Journal of Tropical Medicine and Public Health	2003	34	2	254	258	school-based	Baseline of a follow-up treatment					Province of Kratie	Snoul District	_x0000__x0000__x0000__x0000__x0000__x0000__x0000__x0000__x0000__x0000__x0000__x0000__x0000__x0000__x0000__x0000__x0000__x0000__x0000__x0000__x0000__x0000__x0000__x0000__x0000__x0000__x0000__x0000__x0000__x0000__x0000__x0000__x0000__x0000__x0000__x0000__x0000__x0000__x0000__x0000__x0000__x0000__x0000__x0000__x0000__x0000__x0000__x0000__x0000__x0000__x0000__x0000__x0000__x0000__x0000__x0000__x0000_…	2 Tnou Srok Snoul	Point	12.0535	106.459	google map	Kato-Katz			42	0	0
36	Cambodia	Intestinal helminthic infections in schoolchildren in Cambodia	Sinuon M, Anantaphruti MT, Socheat D	The Southeast Asian Journal of Tropical Medicine and Public Health	2003	34	2	254	258	school-based	Baseline of a follow-up treatment					Province of Kratie	Snoul District	_x0000__x0000__x0000__x0000__x0000__x0000__x0000__x0000__x0000__x0000__x0000__x0000__x0000__x0000__x0000__x0000__x0000__x0000__x0000__x0000__x0000__x0000__x0000__x0000__x0000__x0000__x0000__x0000__x0000__x0000__x0000__x0000__x0000__x0000__x0000__x0000__x0000__x0000__x0000__x0000__x0000__x0000__x0000__x0000__x0000__x0000__x0000__x0000__x0000__x0000__x0000__x0000__x0000__x0000__x0000__x0000__x0000_…	Snoul Watt	Point	12.0717	106.419	google map	Kato-Katz			83	0	0
37	Cambodia	Intestinal helminthic infections in schoolchildren in Cambodia	Sinuon M, Anantaphruti MT, Socheat D	The Southeast Asian Journal of Tropical Medicine and Public Health	2003	34	2	254	258	school-based	Baseline of a follow-up treatment					Province of Kratie	Snoul District	_x0000__x0000__x0000__x0000__x0000__x0000__x0000__x0000__x0000__x0000__x0000__x0000__x0000__x0000__x0000__x0000__x0000__x0000__x0000__x0000__x0000__x0000__x0000__x0000__x0000__x0000__x0000__x0000__x0000__x0000__x0000__x0000__x0000__x0000__x0000__x0000__x0000__x0000__x0000__x0000__x0000__x0000__x0000__x0000__x0000__x0000__x0000__x0000__x0000__x0000__x0000__x0000__x0000__x0000__x0000__x0000__x0000_…	Svay Chras	Point	12.0902	106.422	google map	Kato-Katz			52	0	0
38	Cambodia	Intestinal helminthic infections in schoolchildren in Cambodia	Sinuon M, Anantaphruti MT, Socheat D	The Southeast Asian Journal of Tropical Medicine and Public Health	2003	34	2	254	258	school-based	Baseline of a follow-up treatment					Kampong Chhnang Province	_x0000__x0000__x0000__x0000__x0000__x0000__x0000__x0000__x0000__x0000__x0000__x0000__x0000__x0000__x0000__x0000__x0000__x0000__x0000__x0000__x0000__x0000__x0000__x0000__x0000__x0000__x0000__x0000__x0000__x0000__x0000__x0000__x0000__x0000__x0000__x0000__x0000__x0000__x0000__x0000__x0000__x0000__x0000__x0000__x0000__x0000__x0000__x0000__x0000__x0000__x0000__x0000__x0000__x0000__x0000__x0000__x0000_	_x0000__x0000__x0000__x0000__x0000__x0000__x0000__x0000__x0000__x0000__x0000__x0000__x0000__x0000__x0000__x0000__x0000__x0000__x0000__x0000__x0000__x0000__x0000__x0000__x0000__x0000__x0000__x0000__x0000__x0000__x0000__x0000__x0000__x0000__x0000__x0000__x0000__x0000__x0000__x0000__x0000__x0000__x0000__x0000__x0000__x0000__x0000__x0000__x0000__x0000__x0000__x0000__x0000__x0000__x0000__x0000__x0000_…	Chnok Trou	Point	12.4978	104.397	google map	Kato-Katz			114	0	0
39	Cambodia	Intestinal helminthic infections in schoolchildren in Cambodia	Sinuon M, Anantaphruti MT, Socheat D	The Southeast Asian Journal of Tropical Medicine and Public Health	2003	34	2	254	258	school-based	Baseline of a follow-up treatment					Stung Treng Province	District of Thalaborivatt and Siem Bok	_x0000__x0000__x0000__x0000__x0000__x0000__x0000__x0000__x0000__x0000__x0000__x0000__x0000__x0000__x0000__x0000__x0000__x0000__x0000__x0000__x0000__x0000__x0000__x0000__x0000__x0000__x0000__x0000__x0000__x0000__x0000__x0000__x0000__x0000__x0000__x0000__x0000__x0000__x0000__x0000__x0000__x0000__x0000__x0000__x0000__x0000__x0000__x0000__x0000__x0000__x0000__x0000__x0000__x0000__x0000__x0000__x0000_…	O. Mras	Point	13.5194	105.959	google map	Kato-Katz			80	0	0
40	Cambodia	Intestinal helminthic infections in schoolchildren in Cambodia	Sinuon M, Anantaphruti MT, Socheat D	The Southeast Asian Journal of Tropical Medicine and Public Health	2003	34	2	254	258	school-based	Baseline of a follow-up treatment					Stung Treng Province	District of Thalaborivatt and Siem Bok	_x0000__x0000__x0000__x0000__x0000__x0000__x0000__x0000__x0000__x0000__x0000__x0000__x0000__x0000__x0000__x0000__x0000__x0000__x0000__x0000__x0000__x0000__x0000__x0000__x0000__x0000__x0000__x0000__x0000__x0000__x0000__x0000__x0000__x0000__x0000__x0000__x0000__x0000__x0000__x0000__x0000__x0000__x0000__x0000__x0000__x0000__x0000__x0000__x0000__x0000__x0000__x0000__x0000__x0000__x0000__x0000__x0000_…	Kralapeas	Point	13.6428	106	google map	Kato-Katz			85	4	4.7
41	Cambodia	Intestinal helminthic infections in schoolchildren in Cambodia	Sinuon M, Anantaphruti MT, Socheat D	The Southeast Asian Journal of Tropical Medicine and Public Health	2003	34	2	254	258	school-based	Baseline of a follow-up treatment					Stung Treng Province	District of Thalaborivatt and Siem Bok	_x0000__x0000__x0000__x0000__x0000__x0000__x0000__x0000__x0000__x0000__x0000__x0000__x0000__x0000__x0000__x0000__x0000__x0000__x0000__x0000__x0000__x0000__x0000__x0000__x0000__x0000__x0000__x0000__x0000__x0000__x0000__x0000__x0000__x0000__x0000__x0000__x0000__x0000__x0000__x0000__x0000__x0000__x0000__x0000__x0000__x0000__x0000__x0000__x0000__x0000__x0000__x0000__x0000__x0000__x0000__x0000__x0000_…	Kandal	Point	13.8919	105.997	google map	Kato-Katz			62	4	6.5
42	Cambodia	Intestinal helminthic infections in schoolchildren in Cambodia	Sinuon M, Anantaphruti MT, Socheat D	The Southeast Asian Journal of Tropical Medicine and Public Health	2003	34	2	254	258	school-based	Baseline of a follow-up treatment					Stung Treng Province	District of Thalaborivatt and Siem Bok	_x0000__x0000__x0000__x0000__x0000__x0000__x0000__x0000__x0000__x0000__x0000__x0000__x0000__x0000__x0000__x0000__x0000__x0000__x0000__x0000__x0000__x0000__x0000__x0000__x0000__x0000__x0000__x0000__x0000__x0000__x0000__x0000__x0000__x0000__x0000__x0000__x0000__x0000__x0000__x0000__x0000__x0000__x0000__x0000__x0000__x0000__x0000__x0000__x0000__x0000__x0000__x0000__x0000__x0000__x0000__x0000__x0000_…	O. Svay	Point	13.9057	106.001	google map	Kato-Katz			114	0	0
43	Cambodia	Intestinal helminthic infections in schoolchildren in Cambodia	Sinuon M, Anantaphruti MT, Socheat D	The Southeast Asian Journal of Tropical Medicine and Public Health	2003	34	2	254	258	school-based	Baseline of a follow-up treatment					Kampong Chhnang Province	_x0000__x0000__x0000__x0000__x0000__x0000__x0000__x0000__x0000__x0000__x0000__x0000__x0000__x0000__x0000__x0000__x0000__x0000__x0000__x0000__x0000__x0000__x0000__x0000__x0000__x0000__x0000__x0000__x0000__x0000__x0000__x0000__x0000__x0000__x0000__x0000__x0000__x0000__x0000__x0000__x0000__x0000__x0000__x0000__x0000__x0000__x0000__x0000__x0000__x0000__x0000__x0000__x0000__x0000__x0000__x0000__x0000_	_x0000__x0000__x0000__x0000__x0000__x0000__x0000__x0000__x0000__x0000__x0000__x0000__x0000__x0000__x0000__x0000__x0000__x0000__x0000__x0000__x0000__x0000__x0000__x0000__x0000__x0000__x0000__x0000__x0000__x0000__x0000__x0000__x0000__x0000__x0000__x0000__x0000__x0000__x0000__x0000__x0000__x0000__x0000__x0000__x0000__x0000__x0000__x0000__x0000__x0000__x0000__x0000__x0000__x0000__x0000__x0000__x0000_…	Ta koh	Point	14.4688	104.425	google map	Kato-Katz			79	0	0
44	Cambodia	Prevalence of intestinal parasite infection in Toul Roka village, Phnom Penh municipality, Cambodia	Kobayashi, et al.	Japanese Journal of Tropical Medicine and Hygiene	1999	27	_x0000__x0000__x0000__x0000__x0000_	517	519	community	Cross-sectional study	Dec	Dec	1998	1998	Phnom Penh Municipality	_x0000__x0000__x0000__x0000__x0000__x0000__x0000__x0000__x0000__x0000__x0000__x0000__x0000__x0000__x0000__x0000__x0000__x0000__x0000__x0000__x0000__x0000__x0000__x0000__x0000__x0000__x0000__x0000__x0000__x0000__x0000__x0000__x0000__x0000__x0000__x0000__x0000__x0000__x0000__x0000__x0000__x0000__x0000__x0000__x0000__x0000__x0000__x0000__x0000__x0000__x0000__x0000__x0000__x0000__x0000__x0000__x0000_	_x0000__x0000__x0000__x0000__x0000__x0000__x0000__x0000__x0000__x0000__x0000__x0000__x0000__x0000__x0000__x0000__x0000__x0000__x0000__x0000__x0000__x0000__x0000__x0000__x0000__x0000__x0000__x0000__x0000__x0000__x0000__x0000__x0000__x0000__x0000__x0000__x0000__x0000__x0000__x0000__x0000__x0000__x0000__x0000__x0000__x0000__x0000__x0000__x0000__x0000__x0000__x0000__x0000__x0000__x0000__x0000__x0000_…	Toul Roka village	Point	11.5109	104.935	google map	Combined (Kato-Katz & FECT)			113	4	3.5
45	Cambodia	Prevalence of Opisthorchis viverrini infection in humans and fish in Kratie Province, Cambodia	Sohn WM, Yong TS, Eom KS, Pyo KH, Lee MY, Lim H, Choe S, Jeong HG, Sinuon M, Socheat D, Chai JY	Acta Tropica	2012	124	3	215	220	school-based	Cross-sectional study	May	Jun	2011	2011	Kratie Province	_x0000__x0000__x0000__x0000__x0000__x0000__x0000__x0000__x0000__x0000__x0000__x0000__x0000__x0000__x0000__x0000__x0000__x0000__x0000__x0000__x0000__x0000__x0000__x0000__x0000__x0000__x0000__x0000__x0000__x0000__x0000__x0000__x0000__x0000__x0000__x0000__x0000__x0000__x0000__x0000__x0000__x0000__x0000__x0000__x0000__x0000__x0000__x0000__x0000__x0000__x0000__x0000__x0000__x0000__x0000__x0000__x0000_	_x0000__x0000__x0000__x0000__x0000__x0000__x0000__x0000__x0000__x0000__x0000__x0000__x0000__x0000__x0000__x0000__x0000__x0000__x0000__x0000__x0000__x0000__x0000__x0000__x0000__x0000__x0000__x0000__x0000__x0000__x0000__x0000__x0000__x0000__x0000__x0000__x0000__x0000__x0000__x0000__x0000__x0000__x0000__x0000__x0000__x0000__x0000__x0000__x0000__x0000__x0000__x0000__x0000__x0000__x0000__x0000__x0000_…	Tmor Kre	Point	12.2387	105.124	google map	Kato-Katz	5	14	353	18	5.1
46	Cambodia	Prevalence of Opisthorchis viverrini infection in humans and fish in Kratie Province, Cambodia	Sohn WM, Yong TS, Eom KS, Pyo KH, Lee MY, Lim H, Choe S, Jeong HG, Sinuon M, Socheat D, Chai JY	Acta Tropica	2012	124	3	215	220	community	Cross-sectional study	May	Jun	2011	2011	Kratie Province	_x0000__x0000__x0000__x0000__x0000__x0000__x0000__x0000__x0000__x0000__x0000__x0000__x0000__x0000__x0000__x0000__x0000__x0000__x0000__x0000__x0000__x0000__x0000__x0000__x0000__x0000__x0000__x0000__x0000__x0000__x0000__x0000__x0000__x0000__x0000__x0000__x0000__x0000__x0000__x0000__x0000__x0000__x0000__x0000__x0000__x0000__x0000__x0000__x0000__x0000__x0000__x0000__x0000__x0000__x0000__x0000__x0000_	_x0000__x0000__x0000__x0000__x0000__x0000__x0000__x0000__x0000__x0000__x0000__x0000__x0000__x0000__x0000__x0000__x0000__x0000__x0000__x0000__x0000__x0000__x0000__x0000__x0000__x0000__x0000__x0000__x0000__x0000__x0000__x0000__x0000__x0000__x0000__x0000__x0000__x0000__x0000__x0000__x0000__x0000__x0000__x0000__x0000__x0000__x0000__x0000__x0000__x0000__x0000__x0000__x0000__x0000__x0000__x0000__x0000_…	Talous	Point	12.2565	105.977	google map	Kato-Katz	15	86	211	19	9
47	Cambodia	Prevalence of Opisthorchis viverrini infection in humans and fish in Kratie Province, Cambodia	Sohn WM, Yong TS, Eom KS, Pyo KH, Lee MY, Lim H, Choe S, Jeong HG, Sinuon M, Socheat D, Chai JY	Acta Tropica	2012	124	3	215	220	school-based	Cross-sectional study	May	Jun	2011	2011	Kratie Province	_x0000__x0000__x0000__x0000__x0000__x0000__x0000__x0000__x0000__x0000__x0000__x0000__x0000__x0000__x0000__x0000__x0000__x0000__x0000__x0000__x0000__x0000__x0000__x0000__x0000__x0000__x0000__x0000__x0000__x0000__x0000__x0000__x0000__x0000__x0000__x0000__x0000__x0000__x0000__x0000__x0000__x0000__x0000__x0000__x0000__x0000__x0000__x0000__x0000__x0000__x0000__x0000__x0000__x0000__x0000__x0000__x0000_	_x0000__x0000__x0000__x0000__x0000__x0000__x0000__x0000__x0000__x0000__x0000__x0000__x0000__x0000__x0000__x0000__x0000__x0000__x0000__x0000__x0000__x0000__x0000__x0000__x0000__x0000__x0000__x0000__x0000__x0000__x0000__x0000__x0000__x0000__x0000__x0000__x0000__x0000__x0000__x0000__x0000__x0000__x0000__x0000__x0000__x0000__x0000__x0000__x0000__x0000__x0000__x0000__x0000__x0000__x0000__x0000__x0000_…	Talous	Point	12.2565	105.977	google map	Kato-Katz	5	14	147	2	1.7
48	Cambodia	Prevalence of Opisthorchis viverrini infection in humans and fish in Kratie Province, Cambodia	Sohn WM, Yong TS, Eom KS, Pyo KH, Lee MY, Lim H, Choe S, Jeong HG, Sinuon M, Socheat D, Chai JY	Acta Tropica	2012	124	3	215	220	school-based	Cross-sectional study	May	Jun	2011	2011	Kratie Province	_x0000__x0000__x0000__x0000__x0000__x0000__x0000__x0000__x0000__x0000__x0000__x0000__x0000__x0000__x0000__x0000__x0000__x0000__x0000__x0000__x0000__x0000__x0000__x0000__x0000__x0000__x0000__x0000__x0000__x0000__x0000__x0000__x0000__x0000__x0000__x0000__x0000__x0000__x0000__x0000__x0000__x0000__x0000__x0000__x0000__x0000__x0000__x0000__x0000__x0000__x0000__x0000__x0000__x0000__x0000__x0000__x0000_	_x0000__x0000__x0000__x0000__x0000__x0000__x0000__x0000__x0000__x0000__x0000__x0000__x0000__x0000__x0000__x0000__x0000__x0000__x0000__x0000__x0000__x0000__x0000__x0000__x0000__x0000__x0000__x0000__x0000__x0000__x0000__x0000__x0000__x0000__x0000__x0000__x0000__x0000__x0000__x0000__x0000__x0000__x0000__x0000__x0000__x0000__x0000__x0000__x0000__x0000__x0000__x0000__x0000__x0000__x0000__x0000__x0000_…	Acnouvat	Point	12.3366	106.046	google map	Kato-Katz	5	14	274	5	1.8
49	Cambodia	Prevalence of Opisthorchis viverrini infection in humans and fish in Kratie Province, Cambodia	Sohn WM, Yong TS, Eom KS, Pyo KH, Lee MY, Lim H, Choe S, Jeong HG, Sinuon M, Socheat D, Chai JY	Acta Tropica	2012	124	3	215	220	community	Cross-sectional study	May	Jun	2011	2011	Kratie Province	_x0000__x0000__x0000__x0000__x0000__x0000__x0000__x0000__x0000__x0000__x0000__x0000__x0000__x0000__x0000__x0000__x0000__x0000__x0000__x0000__x0000__x0000__x0000__x0000__x0000__x0000__x0000__x0000__x0000__x0000__x0000__x0000__x0000__x0000__x0000__x0000__x0000__x0000__x0000__x0000__x0000__x0000__x0000__x0000__x0000__x0000__x0000__x0000__x0000__x0000__x0000__x0000__x0000__x0000__x0000__x0000__x0000_	_x0000__x0000__x0000__x0000__x0000__x0000__x0000__x0000__x0000__x0000__x0000__x0000__x0000__x0000__x0000__x0000__x0000__x0000__x0000__x0000__x0000__x0000__x0000__x0000__x0000__x0000__x0000__x0000__x0000__x0000__x0000__x0000__x0000__x0000__x0000__x0000__x0000__x0000__x0000__x0000__x0000__x0000__x0000__x0000__x0000__x0000__x0000__x0000__x0000__x0000__x0000__x0000__x0000__x0000__x0000__x0000__x0000_…	Roka Kandal B	Point	12.4667	106.026	google map	Kato-Katz	15	86	132	12	9.1
50	Cambodia	Prevalence of Opisthorchis viverrini infection in humans and fish in Kratie Province, Cambodia	Sohn WM, Yong TS, Eom KS, Pyo KH, Lee MY, Lim H, Choe S, Jeong HG, Sinuon M, Socheat D, Chai JY	Acta Tropica	2012	124	3	215	220	community	Cross-sectional study	May	Jun	2011	2011	Kratie Province	_x0000__x0000__x0000__x0000__x0000__x0000__x0000__x0000__x0000__x0000__x0000__x0000__x0000__x0000__x0000__x0000__x0000__x0000__x0000__x0000__x0000__x0000__x0000__x0000__x0000__x0000__x0000__x0000__x0000__x0000__x0000__x0000__x0000__x0000__x0000__x0000__x0000__x0000__x0000__x0000__x0000__x0000__x0000__x0000__x0000__x0000__x0000__x0000__x0000__x0000__x0000__x0000__x0000__x0000__x0000__x0000__x0000_	_x0000__x0000__x0000__x0000__x0000__x0000__x0000__x0000__x0000__x0000__x0000__x0000__x0000__x0000__x0000__x0000__x0000__x0000__x0000__x0000__x0000__x0000__x0000__x0000__x0000__x0000__x0000__x0000__x0000__x0000__x0000__x0000__x0000__x0000__x0000__x0000__x0000__x0000__x0000__x0000__x0000__x0000__x0000__x0000__x0000__x0000__x0000__x0000__x0000__x0000__x0000__x0000__x0000__x0000__x0000__x0000__x0000_…	Roka Kandal A	Point	12.4667	106.026	google map	Kato-Katz	15	86	191	37	19.4
51	Cambodia	Prevalence of Opisthorchis viverrini infection in humans and fish in Kratie Province, Cambodia	Sohn WM, Yong TS, Eom KS, Pyo KH, Lee MY, Lim H, Choe S, Jeong HG, Sinuon M, Socheat D, Chai JY	Acta Tropica	2012	124	3	215	220	school-based	Cross-sectional study	May	Jun	2011	2011	Kratie Province	_x0000__x0000__x0000__x0000__x0000__x0000__x0000__x0000__x0000__x0000__x0000__x0000__x0000__x0000__x0000__x0000__x0000__x0000__x0000__x0000__x0000__x0000__x0000__x0000__x0000__x0000__x0000__x0000__x0000__x0000__x0000__x0000__x0000__x0000__x0000__x0000__x0000__x0000__x0000__x0000__x0000__x0000__x0000__x0000__x0000__x0000__x0000__x0000__x0000__x0000__x0000__x0000__x0000__x0000__x0000__x0000__x0000_	_x0000__x0000__x0000__x0000__x0000__x0000__x0000__x0000__x0000__x0000__x0000__x0000__x0000__x0000__x0000__x0000__x0000__x0000__x0000__x0000__x0000__x0000__x0000__x0000__x0000__x0000__x0000__x0000__x0000__x0000__x0000__x0000__x0000__x0000__x0000__x0000__x0000__x0000__x0000__x0000__x0000__x0000__x0000__x0000__x0000__x0000__x0000__x0000__x0000__x0000__x0000__x0000__x0000__x0000__x0000__x0000__x0000_…	Roka Kandal A	Point	12.4667	106.026	google map	Kato-Katz	5	14	424	27	6.4
52	Cambodia	Prevalence of Opisthorchis viverrini infection in humans and fish in Kratie Province, Cambodia	Sohn WM, Yong TS, Eom KS, Pyo KH, Lee MY, Lim H, Choe S, Jeong HG, Sinuon M, Socheat D, Chai JY	Acta Tropica	2012	124	3	215	220	school-based	Cross-sectional study	May	Jun	2011	2011	Kratie Province	_x0000__x0000__x0000__x0000__x0000__x0000__x0000__x0000__x0000__x0000__x0000__x0000__x0000__x0000__x0000__x0000__x0000__x0000__x0000__x0000__x0000__x0000__x0000__x0000__x0000__x0000__x0000__x0000__x0000__x0000__x0000__x0000__x0000__x0000__x0000__x0000__x0000__x0000__x0000__x0000__x0000__x0000__x0000__x0000__x0000__x0000__x0000__x0000__x0000__x0000__x0000__x0000__x0000__x0000__x0000__x0000__x0000_	_x0000__x0000__x0000__x0000__x0000__x0000__x0000__x0000__x0000__x0000__x0000__x0000__x0000__x0000__x0000__x0000__x0000__x0000__x0000__x0000__x0000__x0000__x0000__x0000__x0000__x0000__x0000__x0000__x0000__x0000__x0000__x0000__x0000__x0000__x0000__x0000__x0000__x0000__x0000__x0000__x0000__x0000__x0000__x0000__x0000__x0000__x0000__x0000__x0000__x0000__x0000__x0000__x0000__x0000__x0000__x0000__x0000_…	Kratie Krong	Point	12.486	106.017	google map	Kato-Katz	5	14	300	18	6
53	Cambodia	Prevalence of Opisthorchis viverrini infection in humans and fish in Kratie Province, Cambodia	Sohn WM, Yong TS, Eom KS, Pyo KH, Lee MY, Lim H, Choe S, Jeong HG, Sinuon M, Socheat D, Chai JY	Acta Tropica	2012	124	3	215	220	school-based	Cross-sectional study	May	Jun	2011	2011	Kratie Province	_x0000__x0000__x0000__x0000__x0000__x0000__x0000__x0000__x0000__x0000__x0000__x0000__x0000__x0000__x0000__x0000__x0000__x0000__x0000__x0000__x0000__x0000__x0000__x0000__x0000__x0000__x0000__x0000__x0000__x0000__x0000__x0000__x0000__x0000__x0000__x0000__x0000__x0000__x0000__x0000__x0000__x0000__x0000__x0000__x0000__x0000__x0000__x0000__x0000__x0000__x0000__x0000__x0000__x0000__x0000__x0000__x0000_	_x0000__x0000__x0000__x0000__x0000__x0000__x0000__x0000__x0000__x0000__x0000__x0000__x0000__x0000__x0000__x0000__x0000__x0000__x0000__x0000__x0000__x0000__x0000__x0000__x0000__x0000__x0000__x0000__x0000__x0000__x0000__x0000__x0000__x0000__x0000__x0000__x0000__x0000__x0000__x0000__x0000__x0000__x0000__x0000__x0000__x0000__x0000__x0000__x0000__x0000__x0000__x0000__x0000__x0000__x0000__x0000__x0000_…	Sambok	Point	12.7049	106.146	google map	Kato-Katz	5	14	69	5	7.2
54	Cambodia	Status of intestinal parasites infection among primary school children in Kampongcham, Cambodia	Lee KJ, Bae YT, Kim DH, Deung YK, Ryang YS, Kim HJ, Im KI, Yong TS	The Korean journal of parasitology	2002	40	3	153	155	school-based	Cross-sectional study	Feb	Feb	2002	2002	_x0000__x0000__x0000__x0000__x0000__x0000__x0000__x0000__x0000__x0000__x0000__x0000__x0000__x0000__x0000__x0000__x0000__x0000__x0000__x0000__x0000__x0000__x0000__x0000__x0000__x0000__x0000__x0000__x0000__x0000_	Kampongcham city	_x0000__x0000__x0000__x0000__x0000__x0000__x0000__x0000__x0000__x0000__x0000__x0000__x0000__x0000__x0000__x0000__x0000__x0000__x0000__x0000__x0000__x0000__x0000__x0000__x0000__x0000__x0000__x0000__x0000__x0000__x0000__x0000__x0000__x0000__x0000__x0000__x0000__x0000__x0000__x0000__x0000__x0000__x0000__x0000__x0000__x0000__x0000__x0000__x0000__x0000__x0000__x0000__x0000__x0000__x0000__x0000__x0000_…	Tonlebat primary school	Point	11.3349	104.845	google map	FECT			251	10	4			131	6	4.6	120	4	3.3
55	Cambodia	The prevalence and diversity of intestinal parasitic infections in humans and domestic animals in a rural Cambodian village	Schär F, Inpankaew T, Traub RJ, Khieu V, Dalsgaard A, Chimnoi W, Chhoun C, Sok D, Marti H, Muth S, Odermatt P	Parasitology International	2014	63	_x0000__x0000__x0000__x0000__x0000_	597	603	community	Cross-sectional study	May	May	2012	2012	Preah Vihear province	Rovieng district	_x0000__x0000__x0000__x0000__x0000__x0000__x0000__x0000__x0000__x0000__x0000__x0000__x0000__x0000__x0000__x0000__x0000__x0000__x0000__x0000__x0000__x0000__x0000__x0000__x0000__x0000__x0000__x0000__x0000__x0000__x0000__x0000__x0000__x0000__x0000__x0000__x0000__x0000__x0000__x0000__x0000__x0000__x0000__x0000__x0000__x0000__x0000__x0000__x0000__x0000__x0000__x0000__x0000__x0000__x0000__x0000__x0000_…	Dong village	Point	13.3537	105.115	google map	Combined (Kato-Katz & FECT)	2	84	218	11	5.1
56	Laos	An epidemiological study on Opisthorchis viverrini infection in Lao villages	Kobayashi J, Vannachone B, Sato Y, Manivong K, Nambanya S, Inthakone S	The Southeast Asian Journal of Tropical Medicine and Public Health	2000	31	1	128	132	community	Cross-sectional study	Dec	Dec	1996	1996	Khammouane Province	Thakhek City	_x0000__x0000__x0000__x0000__x0000__x0000__x0000__x0000__x0000__x0000__x0000__x0000__x0000__x0000__x0000__x0000__x0000__x0000__x0000__x0000__x0000__x0000__x0000__x0000__x0000__x0000__x0000__x0000__x0000__x0000__x0000__x0000__x0000__x0000__x0000__x0000__x0000__x0000__x0000__x0000__x0000__x0000__x0000__x0000__x0000__x0000__x0000__x0000__x0000__x0000__x0000__x0000__x0000__x0000__x0000__x0000__x0000_…	Thakkhek Neua village	Point	17.3901	104.804	google map	Kato-Katz	0	>55	224	136	60.7			77	38	49.4	147	98	66.7
57	Laos	An epidemiological study on Opisthorchis viverrini infection in Lao villages	Kobayashi J, Vannachone B, Sato Y, Manivong K, Nambanya S, Inthakone S	The Southeast Asian Journal of Tropical Medicine and Public Health	2000	31	1	128	132	community	Cross-sectional study	Dec	Dec	1996	1996	Khammouane Province	Hinboon district	_x0000__x0000__x0000__x0000__x0000__x0000__x0000__x0000__x0000__x0000__x0000__x0000__x0000__x0000__x0000__x0000__x0000__x0000__x0000__x0000__x0000__x0000__x0000__x0000__x0000__x0000__x0000__x0000__x0000__x0000__x0000__x0000__x0000__x0000__x0000__x0000__x0000__x0000__x0000__x0000__x0000__x0000__x0000__x0000__x0000__x0000__x0000__x0000__x0000__x0000__x0000__x0000__x0000__x0000__x0000__x0000__x0000_…	Sisomsouen village	Point	17.7246	104.572	google map	Kato-Katz	0	>55	189	100	52.9			97	59	60.8	92	41	44.6
58	Laos	An epidemiological study on Opisthorchis viverrini infection in Lao villages	Kobayashi J, Vannachone B, Sato Y, Manivong K, Nambanya S, Inthakone S	The Southeast Asian Journal of Tropical Medicine and Public Health	2000	31	1	128	132	community	Cross-sectional study	Dec	Dec	1996	1996	Khammouane Province	Hinboon district	_x0000__x0000__x0000__x0000__x0000__x0000__x0000__x0000__x0000__x0000__x0000__x0000__x0000__x0000__x0000__x0000__x0000__x0000__x0000__x0000__x0000__x0000__x0000__x0000__x0000__x0000__x0000__x0000__x0000__x0000__x0000__x0000__x0000__x0000__x0000__x0000__x0000__x0000__x0000__x0000__x0000__x0000__x0000__x0000__x0000__x0000__x0000__x0000__x0000__x0000__x0000__x0000__x0000__x0000__x0000__x0000__x0000_…	Phavang village	Point	17.7298	104.562	google map	Kato-Katz	0	>55	258	142	55			132	74	56.1	126	68	54
59	Laos	An epidemiological survey on intestinal parasite infection in Khammouane Province, Lao PDR, with special reference to Strongyloides infection	Vannachone B, Kobayashi J, Nambanya S, Manivong K, Inthakone S, Sato Y	The Southeast Asian Journal of Tropical Medicine and Public Health	1998	29	4	717	722	community	Cross-sectional study	Dec	Dec	1996	1996	Khammouane Province	Thakhek City	_x0000__x0000__x0000__x0000__x0000__x0000__x0000__x0000__x0000__x0000__x0000__x0000__x0000__x0000__x0000__x0000__x0000__x0000__x0000__x0000__x0000__x0000__x0000__x0000__x0000__x0000__x0000__x0000__x0000__x0000__x0000__x0000__x0000__x0000__x0000__x0000__x0000__x0000__x0000__x0000__x0000__x0000__x0000__x0000__x0000__x0000__x0000__x0000__x0000__x0000__x0000__x0000__x0000__x0000__x0000__x0000__x0000_…	Thakhek Neua village	Point	17.3901	104.804	google map	Kato-Katz	0	>60	244	136	60.7
60	Laos	An epidemiological survey on intestinal parasite infection in Khammouane Province, Lao PDR, with special reference to Strongyloides infection	Vannachone B, Kobayashi J, Nambanya S, Manivong K, Inthakone S, Sato Y	The Southeast Asian Journal of Tropical Medicine and Public Health	1998	29	4	717	722	community	Cross-sectional study	Dec	Dec	1996	1996	Khammouane Province	Hinboon district	_x0000__x0000__x0000__x0000__x0000__x0000__x0000__x0000__x0000__x0000__x0000__x0000__x0000__x0000__x0000__x0000__x0000__x0000__x0000__x0000__x0000__x0000__x0000__x0000__x0000__x0000__x0000__x0000__x0000__x0000__x0000__x0000__x0000__x0000__x0000__x0000__x0000__x0000__x0000__x0000__x0000__x0000__x0000__x0000__x0000__x0000__x0000__x0000__x0000__x0000__x0000__x0000__x0000__x0000__x0000__x0000__x0000_…	Sisomsouen village	Point	17.7246	104.572	google map	Kato-Katz	0	>60	190	101	53.1
61	Laos	An epidemiological survey on intestinal parasite infection in Khammouane Province, Lao PDR, with special reference to Strongyloides infection	Vannachone B, Kobayashi J, Nambanya S, Manivong K, Inthakone S, Sato Y	The Southeast Asian Journal of Tropical Medicine and Public Health	1998	29	4	717	722	community	Cross-sectional study	Dec	Dec	1996	1996	Khammouane Province	Hinboon district	_x0000__x0000__x0000__x0000__x0000__x0000__x0000__x0000__x0000__x0000__x0000__x0000__x0000__x0000__x0000__x0000__x0000__x0000__x0000__x0000__x0000__x0000__x0000__x0000__x0000__x0000__x0000__x0000__x0000__x0000__x0000__x0000__x0000__x0000__x0000__x0000__x0000__x0000__x0000__x0000__x0000__x0000__x0000__x0000__x0000__x0000__x0000__x0000__x0000__x0000__x0000__x0000__x0000__x0000__x0000__x0000__x0000_…	Phavang village	Point	17.7298	104.562	google map	Kato-Katz	0	>60	258	142	55
62	Laos	Comparison of novel and standard diagnostic tools for the detection of Schistosoma mekongi infection in Lao People's Democratic Republic and Cambodia	Vonghachack Y, Sayasone S, Khieu V, Bergquist R, van Dam GJ, Hoekstra PT, Corstjens P, Nickel B, Marti H, Utzinger J, Muth S, Odermatt P	Infectious Diseases of Poverty	2017	6	1	127	_x0000__x0000__x0000__x0000__x0000__x0000_	community	Cross-sectional study	Feb	Apr	2016	2016	Champasack province	Khong district	_x0000__x0000__x0000__x0000__x0000__x0000__x0000__x0000__x0000__x0000__x0000__x0000__x0000__x0000__x0000__x0000__x0000__x0000__x0000__x0000__x0000__x0000__x0000__x0000__x0000__x0000__x0000__x0000__x0000__x0000__x0000__x0000__x0000__x0000__x0000__x0000__x0000__x0000__x0000__x0000__x0000__x0000__x0000__x0000__x0000__x0000__x0000__x0000__x0000__x0000__x0000__x0000__x0000__x0000__x0000__x0000__x0000_…	Som VenOok and Ban Yai VeunSom	Point	14.0701	105.945	google map	Kato-Katz	≤9	≥51	181	163	90.1
63	Laos	Copro-DNA diagnosis of Opisthorchis viverrini and Haplorchis taichui infection in an endemic area of Lao PDR	Sato M, Pongvongsa T, Sanguankiat S, Yoonuan T, Dekumyoy P, Kalambaheti T, Keomoungkhoun M, Phimmayoi I, Boupha B, Moji K, Waikagul J.	The Southeast Asian Journal of Tropical Medicine and Public Health	2010	41	1	28	35	community	Cross-sectional study			2008	2008	Savannakhet Province	Sonkon District	_x0000__x0000__x0000__x0000__x0000__x0000__x0000__x0000__x0000__x0000__x0000__x0000__x0000__x0000__x0000__x0000__x0000__x0000__x0000__x0000__x0000__x0000__x0000__x0000__x0000__x0000__x0000__x0000__x0000__x0000__x0000__x0000__x0000__x0000__x0000__x0000__x0000__x0000__x0000__x0000__x0000__x0000__x0000__x0000__x0000__x0000__x0000__x0000__x0000__x0000__x0000__x0000__x0000__x0000__x0000__x0000__x0000_…	Lahanam Village	Point	16.2689	105.262	google map	Kato-Katz			125	48	38.4
64	Laos	Epidemiology of food-borne trematodes and other parasite infections in a fishing community on the Nam Ngum reservoir, Lao PDR	Sithithaworn P, Sukavat K, Vannachone B, Sophonphong K, Ben-Embarek P, Petney T, Andrews R	The Southeast Asian Journal of Tropical Medicine and Public Health	2006	37	6	1083	1090	community	Cross-sectional study	Dec	Dec	1999	1999	_x0000__x0000__x0000__x0000__x0000__x0000__x0000__x0000__x0000__x0000__x0000__x0000__x0000__x0000__x0000__x0000__x0000__x0000__x0000__x0000__x0000__x0000__x0000__x0000__x0000__x0000__x0000__x0000__x0000__x0000_	_x0000__x0000__x0000__x0000__x0000__x0000__x0000__x0000__x0000__x0000__x0000__x0000__x0000__x0000__x0000__x0000__x0000__x0000__x0000__x0000__x0000__x0000__x0000__x0000__x0000__x0000__x0000__x0000__x0000__x0000__x0000__x0000__x0000__x0000__x0000__x0000__x0000__x0000__x0000__x0000__x0000__x0000__x0000__x0000__x0000__x0000__x0000__x0000__x0000__x0000__x0000__x0000__x0000__x0000__x0000__x0000__x0000_	Nam Ngum reservoir	Xai Udom	Point	18.1747	102.614	google map	FECT	0	>60	261	110	42.1
65	Laos	Epidemiology of food-borne trematodes and other parasite infections in a fishing community on the Nam Ngum reservoir, Lao PDR	Sithithaworn P, Sukavat K, Vannachone B, Sophonphong K, Ben-Embarek P, Petney T, Andrews R	The Southeast Asian Journal of Tropical Medicine and Public Health	2006	37	6	1083	1090	community	Cross-sectional study	May	May	1999	1999	_x0000__x0000__x0000__x0000__x0000__x0000__x0000__x0000__x0000__x0000__x0000__x0000__x0000__x0000__x0000__x0000__x0000__x0000__x0000__x0000__x0000__x0000__x0000__x0000__x0000__x0000__x0000__x0000__x0000__x0000_	_x0000__x0000__x0000__x0000__x0000__x0000__x0000__x0000__x0000__x0000__x0000__x0000__x0000__x0000__x0000__x0000__x0000__x0000__x0000__x0000__x0000__x0000__x0000__x0000__x0000__x0000__x0000__x0000__x0000__x0000__x0000__x0000__x0000__x0000__x0000__x0000__x0000__x0000__x0000__x0000__x0000__x0000__x0000__x0000__x0000__x0000__x0000__x0000__x0000__x0000__x0000__x0000__x0000__x0000__x0000__x0000__x0000_	Nam Ngum reservoir	Xai Udom	Point	18.1747	102.614	google map	FECT	0	>60	173	93	53.8
66	Laos	Epidemiology of Opisthorchis viverrini in a rural district of southern Lao PDR	Sayasone S, Odermatt P, Phoumindr N, Vongsaravane X, Sensombath V, Phetsouvanh R, Choulamany X, Strobel M	Transactions of the Royal Society of Tropical Medicine and Hygiene	2007	101	1	40	47	community	Cross-sectional study	Feb	Mar	2004	2004	province of Saravane	Saravane district	_x0000__x0000__x0000__x0000__x0000__x0000__x0000__x0000__x0000__x0000__x0000__x0000__x0000__x0000__x0000__x0000__x0000__x0000__x0000__x0000__x0000__x0000__x0000__x0000__x0000__x0000__x0000__x0000__x0000__x0000__x0000__x0000__x0000__x0000__x0000__x0000__x0000__x0000__x0000__x0000__x0000__x0000__x0000__x0000__x0000__x0000__x0000__x0000__x0000__x0000__x0000__x0000__x0000__x0000__x0000__x0000__x0000_…	Benxeseth	Point	15.5296	106.432	google map	Kato-Katz	18	81			14.3
67	Laos	Epidemiology of Opisthorchis viverrini in a rural district of southern Lao PDR	Sayasone S, Odermatt P, Phoumindr N, Vongsaravane X, Sensombath V, Phetsouvanh R, Choulamany X, Strobel M	Transactions of the Royal Society of Tropical Medicine and Hygiene	2007	101	1	40	47	community	Cross-sectional study	Feb	Mar	2004	2004	province of Saravane	Saravane district	_x0000__x0000__x0000__x0000__x0000__x0000__x0000__x0000__x0000__x0000__x0000__x0000__x0000__x0000__x0000__x0000__x0000__x0000__x0000__x0000__x0000__x0000__x0000__x0000__x0000__x0000__x0000__x0000__x0000__x0000__x0000__x0000__x0000__x0000__x0000__x0000__x0000__x0000__x0000__x0000__x0000__x0000__x0000__x0000__x0000__x0000__x0000__x0000__x0000__x0000__x0000__x0000__x0000__x0000__x0000__x0000__x0000_…	Natum	Point	15.5992	106.231	google map	Kato-Katz	18	81			59.5
68	Laos	Epidemiology of Opisthorchis viverrini in a rural district of southern Lao PDR	Sayasone S, Odermatt P, Phoumindr N, Vongsaravane X, Sensombath V, Phetsouvanh R, Choulamany X, Strobel M	Transactions of the Royal Society of Tropical Medicine and Hygiene	2007	101	1	40	47	community	Cross-sectional study	Feb	Mar	2004	2004	province of Saravane	Saravane district	_x0000__x0000__x0000__x0000__x0000__x0000__x0000__x0000__x0000__x0000__x0000__x0000__x0000__x0000__x0000__x0000__x0000__x0000__x0000__x0000__x0000__x0000__x0000__x0000__x0000__x0000__x0000__x0000__x0000__x0000__x0000__x0000__x0000__x0000__x0000__x0000__x0000__x0000__x0000__x0000__x0000__x0000__x0000__x0000__x0000__x0000__x0000__x0000__x0000__x0000__x0000__x0000__x0000__x0000__x0000__x0000__x0000_…	Channeua	Point	15.626	106.25	google map	Kato-Katz	18	81			66.7
69	Laos	Epidemiology of Opisthorchis viverrini in a rural district of southern Lao PDR	Sayasone S, Odermatt P, Phoumindr N, Vongsaravane X, Sensombath V, Phetsouvanh R, Choulamany X, Strobel M	Transactions of the Royal Society of Tropical Medicine and Hygiene	2007	101	1	40	47	community	Cross-sectional study	Feb	Mar	2004	2004	province of Saravane	Saravane district	_x0000__x0000__x0000__x0000__x0000__x0000__x0000__x0000__x0000__x0000__x0000__x0000__x0000__x0000__x0000__x0000__x0000__x0000__x0000__x0000__x0000__x0000__x0000__x0000__x0000__x0000__x0000__x0000__x0000__x0000__x0000__x0000__x0000__x0000__x0000__x0000__x0000__x0000__x0000__x0000__x0000__x0000__x0000__x0000__x0000__x0000__x0000__x0000__x0000__x0000__x0000__x0000__x0000__x0000__x0000__x0000__x0000_…	Leunbok	Point	15.6276	106.343	google map	Kato-Katz	18	81			44.9
70	Laos	Epidemiology of Opisthorchis viverrini in a rural district of southern Lao PDR	Sayasone S, Odermatt P, Phoumindr N, Vongsaravane X, Sensombath V, Phetsouvanh R, Choulamany X, Strobel M	Transactions of the Royal Society of Tropical Medicine and Hygiene	2007	101	1	40	47	community	Cross-sectional study	Feb	Mar	2004	2004	province of Saravane	Saravane district	_x0000__x0000__x0000__x0000__x0000__x0000__x0000__x0000__x0000__x0000__x0000__x0000__x0000__x0000__x0000__x0000__x0000__x0000__x0000__x0000__x0000__x0000__x0000__x0000__x0000__x0000__x0000__x0000__x0000__x0000__x0000__x0000__x0000__x0000__x0000__x0000__x0000__x0000__x0000__x0000__x0000__x0000__x0000__x0000__x0000__x0000__x0000__x0000__x0000__x0000__x0000__x0000__x0000__x0000__x0000__x0000__x0000_…	Km2	Point	15.6911	106.43	google map	Kato-Katz	18	81			26.7
71	Laos	Epidemiology of Opisthorchis viverrini in a rural district of southern Lao PDR	Sayasone S, Odermatt P, Phoumindr N, Vongsaravane X, Sensombath V, Phetsouvanh R, Choulamany X, Strobel M	Transactions of the Royal Society of Tropical Medicine and Hygiene	2007	101	1	40	47	community	Cross-sectional study	Feb	Mar	2004	2004	province of Saravane	Saravane district	_x0000__x0000__x0000__x0000__x0000__x0000__x0000__x0000__x0000__x0000__x0000__x0000__x0000__x0000__x0000__x0000__x0000__x0000__x0000__x0000__x0000__x0000__x0000__x0000__x0000__x0000__x0000__x0000__x0000__x0000__x0000__x0000__x0000__x0000__x0000__x0000__x0000__x0000__x0000__x0000__x0000__x0000__x0000__x0000__x0000__x0000__x0000__x0000__x0000__x0000__x0000__x0000__x0000__x0000__x0000__x0000__x0000_…	Khokkao	Point	15.7232	106.492	google map	Kato-Katz	18	81			42.4
72	Laos	Epidemiology of Opisthorchis viverrini in a rural district of southern Lao PDR	Sayasone S, Odermatt P, Phoumindr N, Vongsaravane X, Sensombath V, Phetsouvanh R, Choulamany X, Strobel M	Transactions of the Royal Society of Tropical Medicine and Hygiene	2007	101	1	40	47	community	Cross-sectional study	Feb	Mar	2004	2004	province of Saravane	Saravane district	_x0000__x0000__x0000__x0000__x0000__x0000__x0000__x0000__x0000__x0000__x0000__x0000__x0000__x0000__x0000__x0000__x0000__x0000__x0000__x0000__x0000__x0000__x0000__x0000__x0000__x0000__x0000__x0000__x0000__x0000__x0000__x0000__x0000__x0000__x0000__x0000__x0000__x0000__x0000__x0000__x0000__x0000__x0000__x0000__x0000__x0000__x0000__x0000__x0000__x0000__x0000__x0000__x0000__x0000__x0000__x0000__x0000_…	Thamuongkao	Point	15.7295	106.382	google map	Kato-Katz	18	81			62.3
73	Laos	Epidemiology of Opisthorchis viverrini in a rural district of southern Lao PDR	Sayasone S, Odermatt P, Phoumindr N, Vongsaravane X, Sensombath V, Phetsouvanh R, Choulamany X, Strobel M	Transactions of the Royal Society of Tropical Medicine and Hygiene	2007	101	1	40	47	community	Cross-sectional study	Feb	Mar	2004	2004	province of Saravane	Saravane district	_x0000__x0000__x0000__x0000__x0000__x0000__x0000__x0000__x0000__x0000__x0000__x0000__x0000__x0000__x0000__x0000__x0000__x0000__x0000__x0000__x0000__x0000__x0000__x0000__x0000__x0000__x0000__x0000__x0000__x0000__x0000__x0000__x0000__x0000__x0000__x0000__x0000__x0000__x0000__x0000__x0000__x0000__x0000__x0000__x0000__x0000__x0000__x0000__x0000__x0000__x0000__x0000__x0000__x0000__x0000__x0000__x0000_…	Napari	Point	15.736	106.471	google map	Kato-Katz	18	81			70.7
74	Laos	Epidemiology of Opisthorchis viverrini in a rural district of southern Lao PDR	Sayasone S, Odermatt P, Phoumindr N, Vongsaravane X, Sensombath V, Phetsouvanh R, Choulamany X, Strobel M	Transactions of the Royal Society of Tropical Medicine and Hygiene	2007	101	1	40	47	community	Cross-sectional study	Feb	Mar	2004	2004	province of Saravane	Saravane district	_x0000__x0000__x0000__x0000__x0000__x0000__x0000__x0000__x0000__x0000__x0000__x0000__x0000__x0000__x0000__x0000__x0000__x0000__x0000__x0000__x0000__x0000__x0000__x0000__x0000__x0000__x0000__x0000__x0000__x0000__x0000__x0000__x0000__x0000__x0000__x0000__x0000__x0000__x0000__x0000__x0000__x0000__x0000__x0000__x0000__x0000__x0000__x0000__x0000__x0000__x0000__x0000__x0000__x0000__x0000__x0000__x0000_…	Khoksavath	Point	15.7889	106.252	google map	Kato-Katz	18	81			59.7
75	Laos	Epidemiology of Opisthorchis viverrini in a rural district of southern Lao PDR	Sayasone S, Odermatt P, Phoumindr N, Vongsaravane X, Sensombath V, Phetsouvanh R, Choulamany X, Strobel M	Transactions of the Royal Society of Tropical Medicine and Hygiene	2007	101	1	40	47	community	Cross-sectional study	Feb	Mar	2004	2004	province of Saravane	Saravane district	_x0000__x0000__x0000__x0000__x0000__x0000__x0000__x0000__x0000__x0000__x0000__x0000__x0000__x0000__x0000__x0000__x0000__x0000__x0000__x0000__x0000__x0000__x0000__x0000__x0000__x0000__x0000__x0000__x0000__x0000__x0000__x0000__x0000__x0000__x0000__x0000__x0000__x0000__x0000__x0000__x0000__x0000__x0000__x0000__x0000__x0000__x0000__x0000__x0000__x0000__x0000__x0000__x0000__x0000__x0000__x0000__x0000_…	NongMakyYang	Point	15.791	106.319	google map	Kato-Katz	18	81			78.3
76	Laos	Epidemiology of Opisthorchis viverrini in a rural district of southern Lao PDR	Sayasone S, Odermatt P, Phoumindr N, Vongsaravane X, Sensombath V, Phetsouvanh R, Choulamany X, Strobel M	Transactions of the Royal Society of Tropical Medicine and Hygiene	2007	101	1	40	47	community	Cross-sectional study	Feb	Mar	2004	2004	province of Saravane	Saravane district	_x0000__x0000__x0000__x0000__x0000__x0000__x0000__x0000__x0000__x0000__x0000__x0000__x0000__x0000__x0000__x0000__x0000__x0000__x0000__x0000__x0000__x0000__x0000__x0000__x0000__x0000__x0000__x0000__x0000__x0000__x0000__x0000__x0000__x0000__x0000__x0000__x0000__x0000__x0000__x0000__x0000__x0000__x0000__x0000__x0000__x0000__x0000__x0000__x0000__x0000__x0000__x0000__x0000__x0000__x0000__x0000__x0000_…	Nava	Point	15.8018	106.299	google map	Kato-Katz	18	81			59.6
77	Laos	Epidemiology of Opisthorchis viverrini in a rural district of southern Lao PDR	Sayasone S, Odermatt P, Phoumindr N, Vongsaravane X, Sensombath V, Phetsouvanh R, Choulamany X, Strobel M	Transactions of the Royal Society of Tropical Medicine and Hygiene	2007	101	1	40	47	community	Cross-sectional study	Feb	Mar	2004	2004	province of Saravane	Saravane district	_x0000__x0000__x0000__x0000__x0000__x0000__x0000__x0000__x0000__x0000__x0000__x0000__x0000__x0000__x0000__x0000__x0000__x0000__x0000__x0000__x0000__x0000__x0000__x0000__x0000__x0000__x0000__x0000__x0000__x0000__x0000__x0000__x0000__x0000__x0000__x0000__x0000__x0000__x0000__x0000__x0000__x0000__x0000__x0000__x0000__x0000__x0000__x0000__x0000__x0000__x0000__x0000__x0000__x0000__x0000__x0000__x0000_…	Nabone	Point	15.843	106.302	google map	Kato-Katz	18	81			68.8
78	Laos	Epidemiology of Opisthorchis viverrini in a rural district of southern Lao PDR	Sayasone S, Odermatt P, Phoumindr N, Vongsaravane X, Sensombath V, Phetsouvanh R, Choulamany X, Strobel M	Transactions of the Royal Society of Tropical Medicine and Hygiene	2007	101	1	40	47	community	Cross-sectional study	Feb	Mar	2004	2004	province of Saravane	Saravane district	_x0000__x0000__x0000__x0000__x0000__x0000__x0000__x0000__x0000__x0000__x0000__x0000__x0000__x0000__x0000__x0000__x0000__x0000__x0000__x0000__x0000__x0000__x0000__x0000__x0000__x0000__x0000__x0000__x0000__x0000__x0000__x0000__x0000__x0000__x0000__x0000__x0000__x0000__x0000__x0000__x0000__x0000__x0000__x0000__x0000__x0000__x0000__x0000__x0000__x0000__x0000__x0000__x0000__x0000__x0000__x0000__x0000_…	Kengsim	Point	15.8519	106.31	google map	Kato-Katz	18	81			79.7
79	Laos	Epidemiology of Strongyloides stercoralis on Mekong islands in southern Laos	Vonghachack Y, Sayasone S, Bouakhasith D, Taisayavong K, Akkavong K, Odermatt P	Acta Tropica	2015	141	Pt B	289	294	community	Cross-sectional study	Mar	Mar	2011	2011	Champasack province	Khong district	Donlong island	Donlong island	Point	14.0284	105.803	google map	Kato-Katz	2	81	347	264	76.1
80	Laos	Epidemiology of Strongyloides stercoralis on Mekong islands in southern Laos	Vonghachack Y, Sayasone S, Bouakhasith D, Taisayavong K, Akkavong K, Odermatt P	Acta Tropica	2015	141	Pt B	289	294	community	Cross-sectional study	Mar	Mar	2011	2011	Champasack province	Khong district	Donthan/Donlieng island	Donthan/Donlieng island	Point	14.2093	105.918	google map	Kato-Katz	2	95	382	262	68.6
81	Laos	First molecular identification and report of genetic diversity of Strongyloides stercoralis, a current major soil-transmitted helminth in humans from Lao People's Democratic Republic	Laymanivong S, Hangvanthong B, Insisiengmay B, Vanisaveth V, Laxachack P, Jongthawin J, Sanpool O, Thanchomnang T, Sadaow L, Phosuk I, Rodpai R, Maleewong W, Intapan PM	Parasitology Research	2016	115	8	2973	2980	community	Cross-sectional study					Champasack	Khong District	_x0000__x0000__x0000__x0000__x0000__x0000__x0000__x0000__x0000__x0000__x0000__x0000__x0000__x0000__x0000__x0000__x0000__x0000__x0000__x0000__x0000__x0000__x0000__x0000__x0000__x0000__x0000__x0000__x0000__x0000__x0000__x0000__x0000__x0000__x0000__x0000__x0000__x0000__x0000__x0000__x0000__x0000__x0000__x0000__x0000__x0000__x0000__x0000__x0000__x0000__x0000__x0000__x0000__x0000__x0000__x0000__x0000_…	Sane Home village	Point	14.2386	106.15	paper	Kato-Katz	5	98	24		51.5
82	Laos	First molecular identification and report of genetic diversity of Strongyloides stercoralis, a current major soil-transmitted helminth in humans from Lao People's Democratic Republic	Laymanivong S, Hangvanthong B, Insisiengmay B, Vanisaveth V, Laxachack P, Jongthawin J, Sanpool O, Thanchomnang T, Sadaow L, Phosuk I, Rodpai R, Maleewong W, Intapan PM	Parasitology Research	2016	115	8	2973	2980	community	Cross-sectional study					Champasack	Khong District	_x0000__x0000__x0000__x0000__x0000__x0000__x0000__x0000__x0000__x0000__x0000__x0000__x0000__x0000__x0000__x0000__x0000__x0000__x0000__x0000__x0000__x0000__x0000__x0000__x0000__x0000__x0000__x0000__x0000__x0000__x0000__x0000__x0000__x0000__x0000__x0000__x0000__x0000__x0000__x0000__x0000__x0000__x0000__x0000__x0000__x0000__x0000__x0000__x0000__x0000__x0000__x0000__x0000__x0000__x0000__x0000__x0000_…	Had Ngew village	Point	14.3508	106.047	paper	Kato-Katz	5	98	73		51.5
83	Laos	First molecular identification and report of genetic diversity of Strongyloides stercoralis, a current major soil-transmitted helminth in humans from Lao People's Democratic Republic	Laymanivong S, Hangvanthong B, Insisiengmay B, Vanisaveth V, Laxachack P, Jongthawin J, Sanpool O, Thanchomnang T, Sadaow L, Phosuk I, Rodpai R, Maleewong W, Intapan PM	Parasitology Research	2016	115	8	2973	2980	community	Cross-sectional study					Luang Prabang	Pak Ou District	_x0000__x0000__x0000__x0000__x0000__x0000__x0000__x0000__x0000__x0000__x0000__x0000__x0000__x0000__x0000__x0000__x0000__x0000__x0000__x0000__x0000__x0000__x0000__x0000__x0000__x0000__x0000__x0000__x0000__x0000__x0000__x0000__x0000__x0000__x0000__x0000__x0000__x0000__x0000__x0000__x0000__x0000__x0000__x0000__x0000__x0000__x0000__x0000__x0000__x0000__x0000__x0000__x0000__x0000__x0000__x0000__x0000_…	Huay Pan village	Point	16.5164	103.038	paper	Kato-Katz	5	98	121		24.8
84	Laos	First molecular identification and report of genetic diversity of Strongyloides stercoralis, a current major soil-transmitted helminth in humans from Lao People's Democratic Republic	Laymanivong S, Hangvanthong B, Insisiengmay B, Vanisaveth V, Laxachack P, Jongthawin J, Sanpool O, Thanchomnang T, Sadaow L, Phosuk I, Rodpai R, Maleewong W, Intapan PM	Parasitology Research	2016	115	8	2973	2980	community	Cross-sectional study					Khammouane	Xebungfai District	_x0000__x0000__x0000__x0000__x0000__x0000__x0000__x0000__x0000__x0000__x0000__x0000__x0000__x0000__x0000__x0000__x0000__x0000__x0000__x0000__x0000__x0000__x0000__x0000__x0000__x0000__x0000__x0000__x0000__x0000__x0000__x0000__x0000__x0000__x0000__x0000__x0000__x0000__x0000__x0000__x0000__x0000__x0000__x0000__x0000__x0000__x0000__x0000__x0000__x0000__x0000__x0000__x0000__x0000__x0000__x0000__x0000_…	Had KhumHaing village	Point	17.1464	105.051	paper	Kato-Katz	5	98	109		40.4
85	Laos	Helminth and intestinal protozoa infections, multiparasitism and risk factors in Champasack province, Lao People's Democratic Republic	Sayasone S, Mak TK, Vanmany M, Rasphone O, Vounatsou P, Utzinger J, Akkhavong K, Odermatt P	PLOS Neglected Tropical Diseases	2011	5	4	e1037	_x0000__x0000__x0000__x0000__x0000__x0000_	community	Cross-sectional study	Mar	May	2006	2006	Champasack province	Khong	_x0000__x0000__x0000__x0000__x0000__x0000__x0000__x0000__x0000__x0000__x0000__x0000__x0000__x0000__x0000__x0000__x0000__x0000__x0000__x0000__x0000__x0000__x0000__x0000__x0000__x0000__x0000__x0000__x0000__x0000__x0000__x0000__x0000__x0000__x0000__x0000__x0000__x0000__x0000__x0000__x0000__x0000__x0000__x0000__x0000__x0000__x0000__x0000__x0000__x0000__x0000__x0000__x0000__x0000__x0000__x0000__x0000_…	Khong 3 villages	Point	14.05	105.796	google map	Combined (Kato-Katz & FECT)	0.5	87	225		92
86	Laos	Helminth and intestinal protozoa infections, multiparasitism and risk factors in Champasack province, Lao People's Democratic Republic	Sayasone S, Mak TK, Vanmany M, Rasphone O, Vounatsou P, Utzinger J, Akkhavong K, Odermatt P	PLOS Neglected Tropical Diseases	2011	5	4	e1037	_x0000__x0000__x0000__x0000__x0000__x0000_	community	Cross-sectional study	Mar	May	2006	2006	Champasack province	Mounlapamok	_x0000__x0000__x0000__x0000__x0000__x0000__x0000__x0000__x0000__x0000__x0000__x0000__x0000__x0000__x0000__x0000__x0000__x0000__x0000__x0000__x0000__x0000__x0000__x0000__x0000__x0000__x0000__x0000__x0000__x0000__x0000__x0000__x0000__x0000__x0000__x0000__x0000__x0000__x0000__x0000__x0000__x0000__x0000__x0000__x0000__x0000__x0000__x0000__x0000__x0000__x0000__x0000__x0000__x0000__x0000__x0000__x0000_…	Mounlapamok 3 villages	Point	14.3931	105.719	google map	Combined (Kato-Katz & FECT)	0.5	87	232		90.9
87	Laos	Helminth and intestinal protozoa infections, multiparasitism and risk factors in Champasack province, Lao People's Democratic Republic	Sayasone S, Mak TK, Vanmany M, Rasphone O, Vounatsou P, Utzinger J, Akkhavong K, Odermatt P	PLOS Neglected Tropical Diseases	2011	5	4	e1037	_x0000__x0000__x0000__x0000__x0000__x0000_	community	Cross-sectional study	Mar	May	2006	2006	Champasack province	Paksong districts	_x0000__x0000__x0000__x0000__x0000__x0000__x0000__x0000__x0000__x0000__x0000__x0000__x0000__x0000__x0000__x0000__x0000__x0000__x0000__x0000__x0000__x0000__x0000__x0000__x0000__x0000__x0000__x0000__x0000__x0000__x0000__x0000__x0000__x0000__x0000__x0000__x0000__x0000__x0000__x0000__x0000__x0000__x0000__x0000__x0000__x0000__x0000__x0000__x0000__x0000__x0000__x0000__x0000__x0000__x0000__x0000__x0000_…	Paksong districts 3 villages	Point	15.0553	106.571	google map	Combined (Kato-Katz & FECT)	0.5	87	212		5.7
88	Laos	High prevalence of Haplorchis taichui, Phaneropsolus molenkampi, and other helminth infections among people in Khammouane province, Lao PDR	Chai JY, Han ET, Shin EH, Sohn WM, Yong TS, Eom KS, Min DY, Um JY, Park MS, Hoang EH, Phommasack B, Insisiengmay B, Lee SH, Rim HJ	The Korean journal of parasitology	2009	47	3	243	247	community	Cross-sectional study	Mar	Mar	2003	2003	Khammouane province	_x0000__x0000__x0000__x0000__x0000__x0000__x0000__x0000__x0000__x0000__x0000__x0000__x0000__x0000__x0000__x0000__x0000__x0000__x0000__x0000__x0000__x0000__x0000__x0000__x0000__x0000__x0000__x0000__x0000__x0000__x0000__x0000__x0000__x0000__x0000__x0000__x0000__x0000__x0000__x0000__x0000__x0000__x0000__x0000__x0000__x0000__x0000__x0000__x0000__x0000__x0000__x0000__x0000__x0000__x0000__x0000__x0000_	_x0000__x0000__x0000__x0000__x0000__x0000__x0000__x0000__x0000__x0000__x0000__x0000__x0000__x0000__x0000__x0000__x0000__x0000__x0000__x0000__x0000__x0000__x0000__x0000__x0000__x0000__x0000__x0000__x0000__x0000__x0000__x0000__x0000__x0000__x0000__x0000__x0000__x0000__x0000__x0000__x0000__x0000__x0000__x0000__x0000__x0000__x0000__x0000__x0000__x0000__x0000__x0000__x0000__x0000__x0000__x0000__x0000_…	Bane Nong Bone, Bane Mahaxay, and Bane Phova	Point	17.4484	104.764	google map	Kato-Katz	6	80	1242	1007	81.1			590	499	84.6	652	508	77.9
89	Laos	High prevalence of liver and intestinal fluke infections among residents of Savannakhet Province in Laos	Chai JY, Han ET, Guk SM, Shin EH, Sohn WM, Yong TS, Eom KS, Lee KH, Jeong HG, Ryang YS, Hoang EH, Phommasack B, Insisiengmay B, Lee SH, Rim HJ	The Korean journal of parasitology	2007	45	3	213	218	community	Cross-sectional study	Jul	Jul	2002	2002	Savannakhet Province	_x0000__x0000__x0000__x0000__x0000__x0000__x0000__x0000__x0000__x0000__x0000__x0000__x0000__x0000__x0000__x0000__x0000__x0000__x0000__x0000__x0000__x0000__x0000__x0000__x0000__x0000__x0000__x0000__x0000__x0000__x0000__x0000__x0000__x0000__x0000__x0000__x0000__x0000__x0000__x0000__x0000__x0000__x0000__x0000__x0000__x0000__x0000__x0000__x0000__x0000__x0000__x0000__x0000__x0000__x0000__x0000__x0000_	_x0000__x0000__x0000__x0000__x0000__x0000__x0000__x0000__x0000__x0000__x0000__x0000__x0000__x0000__x0000__x0000__x0000__x0000__x0000__x0000__x0000__x0000__x0000__x0000__x0000__x0000__x0000__x0000__x0000__x0000__x0000__x0000__x0000__x0000__x0000__x0000__x0000__x0000__x0000__x0000__x0000__x0000__x0000__x0000__x0000__x0000__x0000__x0000__x0000__x0000__x0000__x0000__x0000__x0000__x0000__x0000__x0000_…	Four villages (Bane Xok, Bane Phonsoun, Bane Houay, and Ban Nhangsoung)	Point	16.9162	104.751	google map	Kato-Katz	3	76	981	658	67.1
90	Laos	Intestinal Parasitic Infections and Environmental Water Contamination in a Rural Village of Northern Lao PDR	Ribas A, Jollivet C, Morand S, Thongmalayvong B, Somphavong S, Siew C, Ting P, Suputtamongkol S, Saensombath V, Sanguankiat S, Tan B, Paboriboune P, Akkhavong K, Chaisiri K	The Korean journal of parasitology	2017	55	5	523	532	community	Cross-sectional study					Luang Prabang Province	Luang Prabang district	_x0000__x0000__x0000__x0000__x0000__x0000__x0000__x0000__x0000__x0000__x0000__x0000__x0000__x0000__x0000__x0000__x0000__x0000__x0000__x0000__x0000__x0000__x0000__x0000__x0000__x0000__x0000__x0000__x0000__x0000__x0000__x0000__x0000__x0000__x0000__x0000__x0000__x0000__x0000__x0000__x0000__x0000__x0000__x0000__x0000__x0000__x0000__x0000__x0000__x0000__x0000__x0000__x0000__x0000__x0000__x0000__x0000_…	Bann Lak Sip village	Point	19.8488	102.168	paper	Kato-Katz			305	2	0.66
91	Laos	Local perceptions and practices in regard to opisthorchiasis in two villages in Lao PDR	Strandgaard H, Johansen MV, Aagaard-Hansen J, Petlueng P, Ornbjerg N	The Southeast Asian Journal of Tropical Medicine and Public Health	2008	39	1	19	26	community	Baseline of a randomized clinical trial	Sep	Sep	2004	2004	Vientiane Province	Viengkham District	_x0000__x0000__x0000__x0000__x0000__x0000__x0000__x0000__x0000__x0000__x0000__x0000__x0000__x0000__x0000__x0000__x0000__x0000__x0000__x0000__x0000__x0000__x0000__x0000__x0000__x0000__x0000__x0000__x0000__x0000__x0000__x0000__x0000__x0000__x0000__x0000__x0000__x0000__x0000__x0000__x0000__x0000__x0000__x0000__x0000__x0000__x0000__x0000__x0000__x0000__x0000__x0000__x0000__x0000__x0000__x0000__x0000_…	Ponehang Village	Point	18.531	101.937	google map	Not stated or missing	30	62	203		35
92	Laos	Local perceptions and practices in regard to opisthorchiasis in two villages in Lao PDR	Strandgaard H, Johansen MV, Aagaard-Hansen J, Petlueng P, Ornbjerg N	The Southeast Asian Journal of Tropical Medicine and Public Health	2008	39	1	19	26	community	Baseline of a randomized clinical trial	Apr	Apr	2002	2002	Vientiane Province	Keo Udom District	_x0000__x0000__x0000__x0000__x0000__x0000__x0000__x0000__x0000__x0000__x0000__x0000__x0000__x0000__x0000__x0000__x0000__x0000__x0000__x0000__x0000__x0000__x0000__x0000__x0000__x0000__x0000__x0000__x0000__x0000__x0000__x0000__x0000__x0000__x0000__x0000__x0000__x0000__x0000__x0000__x0000__x0000__x0000__x0000__x0000__x0000__x0000__x0000__x0000__x0000__x0000__x0000__x0000__x0000__x0000__x0000__x0000_…	Nala Village	Point	18.5605	102.46	google map	Not stated or missing	30	62			62
93	Laos	Morbidity assessment of Opisthorchis viverrini infection in rural Laos: I. Parasitological, clinical, ultrasonographical and biochemical findings	Feldmeier H, Hazay M, Sato M, Tiengkham P, Nishimoto F, Jiang H, Sopraseuth V, Moji K	Tropical Medicine and Health	2016	44	_x0000__x0000__x0000__x0000__x0000_	12	_x0000__x0000__x0000__x0000__x0000__x0000_	community	Cross-sectional study					Savannakhet Province	Sonkhone District	_x0000__x0000__x0000__x0000__x0000__x0000__x0000__x0000__x0000__x0000__x0000__x0000__x0000__x0000__x0000__x0000__x0000__x0000__x0000__x0000__x0000__x0000__x0000__x0000__x0000__x0000__x0000__x0000__x0000__x0000__x0000__x0000__x0000__x0000__x0000__x0000__x0000__x0000__x0000__x0000__x0000__x0000__x0000__x0000__x0000__x0000__x0000__x0000__x0000__x0000__x0000__x0000__x0000__x0000__x0000__x0000__x0000_…	Non Somboon village	Point	16.239	105.185	google map	Kato-Katz	26	56	29	15	52.7
94	Laos	Morbidity assessment of Opisthorchis viverrini infection in rural Laos: I. Parasitological, clinical, ultrasonographical and biochemical findings	Feldmeier H, Hazay M, Sato M, Tiengkham P, Nishimoto F, Jiang H, Sopraseuth V, Moji K	Tropical Medicine and Health	2016	44	_x0000__x0000__x0000__x0000__x0000_	12	_x0000__x0000__x0000__x0000__x0000__x0000_	community	Cross-sectional study					Savannakhet Province	Sonkhone District	_x0000__x0000__x0000__x0000__x0000__x0000__x0000__x0000__x0000__x0000__x0000__x0000__x0000__x0000__x0000__x0000__x0000__x0000__x0000__x0000__x0000__x0000__x0000__x0000__x0000__x0000__x0000__x0000__x0000__x0000__x0000__x0000__x0000__x0000__x0000__x0000__x0000__x0000__x0000__x0000__x0000__x0000__x0000__x0000__x0000__x0000__x0000__x0000__x0000__x0000__x0000__x0000__x0000__x0000__x0000__x0000__x0000_…	Lahanam village	Point	16.2712	105.263	google map	Kato-Katz	20	58	45	45	100
95	Laos	Morbidity assessment of Opisthorchis viverrini infection in rural Laos: I. Parasitological, clinical, ultrasonographical and biochemical findings	Feldmeier H, Hazay M, Sato M, Tiengkham P, Nishimoto F, Jiang H, Sopraseuth V, Moji K	Tropical Medicine and Health	2016	44	_x0000__x0000__x0000__x0000__x0000_	12	_x0000__x0000__x0000__x0000__x0000__x0000_	community	Cross-sectional study					Savannakhet Province	_x0000__x0000__x0000__x0000__x0000__x0000__x0000__x0000__x0000__x0000__x0000__x0000__x0000__x0000__x0000__x0000__x0000__x0000__x0000__x0000__x0000__x0000__x0000__x0000__x0000__x0000__x0000__x0000__x0000__x0000__x0000__x0000__x0000__x0000__x0000__x0000__x0000__x0000__x0000__x0000__x0000__x0000__x0000__x0000__x0000__x0000__x0000__x0000__x0000__x0000__x0000__x0000__x0000__x0000__x0000__x0000__x0000_	_x0000__x0000__x0000__x0000__x0000__x0000__x0000__x0000__x0000__x0000__x0000__x0000__x0000__x0000__x0000__x0000__x0000__x0000__x0000__x0000__x0000__x0000__x0000__x0000__x0000__x0000__x0000__x0000__x0000__x0000__x0000__x0000__x0000__x0000__x0000__x0000__x0000__x0000__x0000__x0000__x0000__x0000__x0000__x0000__x0000__x0000__x0000__x0000__x0000__x0000__x0000__x0000__x0000__x0000__x0000__x0000__x0000_…	Savannakhet town	Point	16.5502	104.747	google map	Kato-Katz	22	43	18	9	50
96	Laos	Patterns of trematode infections of Opisthorchis viverrini (Opisthorchiidae) and Haplorchis taichui (Heterophyidae) in human populations from two villages in Savannakhet Province, Lao PDR	Sato M, Pongvongsa T, Sanguankiat S, Yoonuan T, Kobayashi J, Boupha B, Nishimoto F, Moji K, Sato MO, Waikagul J	Journal of Helminthology	2015	89	4	439	445	community	Cross-sectional study			2011	2011	Savannakhet Province	_x0000__x0000__x0000__x0000__x0000__x0000__x0000__x0000__x0000__x0000__x0000__x0000__x0000__x0000__x0000__x0000__x0000__x0000__x0000__x0000__x0000__x0000__x0000__x0000__x0000__x0000__x0000__x0000__x0000__x0000__x0000__x0000__x0000__x0000__x0000__x0000__x0000__x0000__x0000__x0000__x0000__x0000__x0000__x0000__x0000__x0000__x0000__x0000__x0000__x0000__x0000__x0000__x0000__x0000__x0000__x0000__x0000_	_x0000__x0000__x0000__x0000__x0000__x0000__x0000__x0000__x0000__x0000__x0000__x0000__x0000__x0000__x0000__x0000__x0000__x0000__x0000__x0000__x0000__x0000__x0000__x0000__x0000__x0000__x0000__x0000__x0000__x0000__x0000__x0000__x0000__x0000__x0000__x0000__x0000__x0000__x0000__x0000__x0000__x0000__x0000__x0000__x0000__x0000__x0000__x0000__x0000__x0000__x0000__x0000__x0000__x0000__x0000__x0000__x0000_…	Lahanam and Thakhamlien villages	Point	16.2712	105.263	google map	Kato-Katz	0	60	82		20.5
97	Laos	Patterns of trematode infections of Opisthorchis viverrini (Opisthorchiidae) and Haplorchis taichui (Heterophyidae) in human populations from two villages in Savannakhet Province, Lao PDR	Sato M, Pongvongsa T, Sanguankiat S, Yoonuan T, Kobayashi J, Boupha B, Nishimoto F, Moji K, Sato MO, Waikagul J	Journal of Helminthology	2015	89	4	439	445	community	Cross-sectional study			2008	2008	Savannakhet Province	_x0000__x0000__x0000__x0000__x0000__x0000__x0000__x0000__x0000__x0000__x0000__x0000__x0000__x0000__x0000__x0000__x0000__x0000__x0000__x0000__x0000__x0000__x0000__x0000__x0000__x0000__x0000__x0000__x0000__x0000__x0000__x0000__x0000__x0000__x0000__x0000__x0000__x0000__x0000__x0000__x0000__x0000__x0000__x0000__x0000__x0000__x0000__x0000__x0000__x0000__x0000__x0000__x0000__x0000__x0000__x0000__x0000_	_x0000__x0000__x0000__x0000__x0000__x0000__x0000__x0000__x0000__x0000__x0000__x0000__x0000__x0000__x0000__x0000__x0000__x0000__x0000__x0000__x0000__x0000__x0000__x0000__x0000__x0000__x0000__x0000__x0000__x0000__x0000__x0000__x0000__x0000__x0000__x0000__x0000__x0000__x0000__x0000__x0000__x0000__x0000__x0000__x0000__x0000__x0000__x0000__x0000__x0000__x0000__x0000__x0000__x0000__x0000__x0000__x0000_…	Lahanam and Thakhamlien villages	Point	16.2712	105.263	google map	Kato-Katz	0	60	125		38.4
98	Laos	PCR Diagnosis of Opisthorchis viverrini and Haplorchis taichui Infections in a Lao Community in an area of endemicity and comparison of diagnostic methods for parasitological field surveys	Lovis L, Mak TK, Phongluxa K, Soukhathammavong P, Sayasone S, Akkhavong K, Odermatt P, Keiser J, Felger I	Journal of Clinical Microbiology	2009	47	5	1517	1523	community	Cross-sectional study	Mar	Mar	2007	2007	Champasack Province	Khong District	Don Long island	Long Song and Hang Long	Point	14.0428	105.799	paper	Kato-Katz			91	72	79.1
99	Laos	Present Situation of Opisthorchiasis in Vientiane Capital, Lao Peoples’ Democratic Republic	Nakamura S	Nihon eiseigaku zasshi. Japanese journal of hygiene	2017	72	2	101	105	community	Cross-sectional study			2011	2011	Vientiane capital	_x0000__x0000__x0000__x0000__x0000__x0000__x0000__x0000__x0000__x0000__x0000__x0000__x0000__x0000__x0000__x0000__x0000__x0000__x0000__x0000__x0000__x0000__x0000__x0000__x0000__x0000__x0000__x0000__x0000__x0000__x0000__x0000__x0000__x0000__x0000__x0000__x0000__x0000__x0000__x0000__x0000__x0000__x0000__x0000__x0000__x0000__x0000__x0000__x0000__x0000__x0000__x0000__x0000__x0000__x0000__x0000__x0000_	_x0000__x0000__x0000__x0000__x0000__x0000__x0000__x0000__x0000__x0000__x0000__x0000__x0000__x0000__x0000__x0000__x0000__x0000__x0000__x0000__x0000__x0000__x0000__x0000__x0000__x0000__x0000__x0000__x0000__x0000__x0000__x0000__x0000__x0000__x0000__x0000__x0000__x0000__x0000__x0000__x0000__x0000__x0000__x0000__x0000__x0000__x0000__x0000__x0000__x0000__x0000__x0000__x0000__x0000__x0000__x0000__x0000_…	Phailom village	Point	17.9841	102.553	google map	Kato-Katz			144	73	50.69
100	Laos	Present Situation of Opisthorchiasis in Vientiane Capital, Lao Peoples’ Democratic Republic	Nakamura S	Nihon eiseigaku zasshi. Japanese journal of hygiene	2017	72	2	101	105	community	Cross-sectional study			2012	2012	Vientiane capital	_x0000__x0000__x0000__x0000__x0000__x0000__x0000__x0000__x0000__x0000__x0000__x0000__x0000__x0000__x0000__x0000__x0000__x0000__x0000__x0000__x0000__x0000__x0000__x0000__x0000__x0000__x0000__x0000__x0000__x0000__x0000__x0000__x0000__x0000__x0000__x0000__x0000__x0000__x0000__x0000__x0000__x0000__x0000__x0000__x0000__x0000__x0000__x0000__x0000__x0000__x0000__x0000__x0000__x0000__x0000__x0000__x0000_	_x0000__x0000__x0000__x0000__x0000__x0000__x0000__x0000__x0000__x0000__x0000__x0000__x0000__x0000__x0000__x0000__x0000__x0000__x0000__x0000__x0000__x0000__x0000__x0000__x0000__x0000__x0000__x0000__x0000__x0000__x0000__x0000__x0000__x0000__x0000__x0000__x0000__x0000__x0000__x0000__x0000__x0000__x0000__x0000__x0000__x0000__x0000__x0000__x0000__x0000__x0000__x0000__x0000__x0000__x0000__x0000__x0000_…	Phailom village	Point	17.9841	102.553	google map	Kato-Katz			152	80	52.63
101	Laos	Prevalence of Haplorchis taichui among humans and fish in Luang Prabang Province, Lao PDR	Sohn WM, Yong TS, Eom KS, Min DY, Lee D, Jung BK, Banouvong V, Insisiengmay B, Phommasack B, Rim HJ, Chai JY	Acta Tropica	2014	136	_x0000__x0000__x0000__x0000__x0000_	74	80	community	Cross-sectional study			2007	2011	Luang Prabang Province	Pak Ou District	_x0000__x0000__x0000__x0000__x0000__x0000__x0000__x0000__x0000__x0000__x0000__x0000__x0000__x0000__x0000__x0000__x0000__x0000__x0000__x0000__x0000__x0000__x0000__x0000__x0000__x0000__x0000__x0000__x0000__x0000__x0000__x0000__x0000__x0000__x0000__x0000__x0000__x0000__x0000__x0000__x0000__x0000__x0000__x0000__x0000__x0000__x0000__x0000__x0000__x0000__x0000__x0000__x0000__x0000__x0000__x0000__x0000_…	Thine (D)	Point	19.4847	102.187	paper	Kato-Katz	16	80	60	19	31.7
102	Laos	Prevalence of Haplorchis taichui among humans and fish in Luang Prabang Province, Lao PDR	Sohn WM, Yong TS, Eom KS, Min DY, Lee D, Jung BK, Banouvong V, Insisiengmay B, Phommasack B, Rim HJ, Chai JY	Acta Tropica	2014	136	_x0000__x0000__x0000__x0000__x0000_	74	80	community	Cross-sectional study			2007	2011	Luang Prabang Province	Pak Ou District	_x0000__x0000__x0000__x0000__x0000__x0000__x0000__x0000__x0000__x0000__x0000__x0000__x0000__x0000__x0000__x0000__x0000__x0000__x0000__x0000__x0000__x0000__x0000__x0000__x0000__x0000__x0000__x0000__x0000__x0000__x0000__x0000__x0000__x0000__x0000__x0000__x0000__x0000__x0000__x0000__x0000__x0000__x0000__x0000__x0000__x0000__x0000__x0000__x0000__x0000__x0000__x0000__x0000__x0000__x0000__x0000__x0000_…	Pak Chek (C)	Point	19.6219	102.126	paper	Kato-Katz	16	80	53	20	37.7
103	Laos	Prevalence of Haplorchis taichui among humans and fish in Luang Prabang Province, Lao PDR	Sohn WM, Yong TS, Eom KS, Min DY, Lee D, Jung BK, Banouvong V, Insisiengmay B, Phommasack B, Rim HJ, Chai JY	Acta Tropica	2014	136	_x0000__x0000__x0000__x0000__x0000_	74	80	community	Cross-sectional study			2007	2011	Luang Prabang Province	Luang Prabang District	_x0000__x0000__x0000__x0000__x0000__x0000__x0000__x0000__x0000__x0000__x0000__x0000__x0000__x0000__x0000__x0000__x0000__x0000__x0000__x0000__x0000__x0000__x0000__x0000__x0000__x0000__x0000__x0000__x0000__x0000__x0000__x0000__x0000__x0000__x0000__x0000__x0000__x0000__x0000__x0000__x0000__x0000__x0000__x0000__x0000__x0000__x0000__x0000__x0000__x0000__x0000__x0000__x0000__x0000__x0000__x0000__x0000_…	Phone Nguam (H)	Point	19.8881	102.269	paper	Kato-Katz	16	80	45	3	6.6
104	Laos	Prevalence of Haplorchis taichui among humans and fish in Luang Prabang Province, Lao PDR	Sohn WM, Yong TS, Eom KS, Min DY, Lee D, Jung BK, Banouvong V, Insisiengmay B, Phommasack B, Rim HJ, Chai JY	Acta Tropica	2014	136	_x0000__x0000__x0000__x0000__x0000_	74	80	community	Cross-sectional study			2007	2011	Luang Prabang Province	Pak Ou District	_x0000__x0000__x0000__x0000__x0000__x0000__x0000__x0000__x0000__x0000__x0000__x0000__x0000__x0000__x0000__x0000__x0000__x0000__x0000__x0000__x0000__x0000__x0000__x0000__x0000__x0000__x0000__x0000__x0000__x0000__x0000__x0000__x0000__x0000__x0000__x0000__x0000__x0000__x0000__x0000__x0000__x0000__x0000__x0000__x0000__x0000__x0000__x0000__x0000__x0000__x0000__x0000__x0000__x0000__x0000__x0000__x0000_…	Sibounhome (E)	Point	19.9604	102.318	paper	Kato-Katz	16	80	48	4	8.3
105	Laos	Prevalence of Haplorchis taichui among humans and fish in Luang Prabang Province, Lao PDR	Sohn WM, Yong TS, Eom KS, Min DY, Lee D, Jung BK, Banouvong V, Insisiengmay B, Phommasack B, Rim HJ, Chai JY	Acta Tropica	2014	136	_x0000__x0000__x0000__x0000__x0000_	74	80	community	Cross-sectional study			2007	2011	Luang Prabang Province	Nambak District	_x0000__x0000__x0000__x0000__x0000__x0000__x0000__x0000__x0000__x0000__x0000__x0000__x0000__x0000__x0000__x0000__x0000__x0000__x0000__x0000__x0000__x0000__x0000__x0000__x0000__x0000__x0000__x0000__x0000__x0000__x0000__x0000__x0000__x0000__x0000__x0000__x0000__x0000__x0000__x0000__x0000__x0000__x0000__x0000__x0000__x0000__x0000__x0000__x0000__x0000__x0000__x0000__x0000__x0000__x0000__x0000__x0000_…	Phonsavanh (B)	Point	20.1101	102.277	paper	Kato-Katz	16	80	42	3	7.1
106	Laos	Prevalence of Haplorchis taichui among humans and fish in Luang Prabang Province, Lao PDR	Sohn WM, Yong TS, Eom KS, Min DY, Lee D, Jung BK, Banouvong V, Insisiengmay B, Phommasack B, Rim HJ, Chai JY	Acta Tropica	2014	136	_x0000__x0000__x0000__x0000__x0000_	74	80	community	Cross-sectional study			2007	2011	Luang Prabang Province	Pak Ou District	_x0000__x0000__x0000__x0000__x0000__x0000__x0000__x0000__x0000__x0000__x0000__x0000__x0000__x0000__x0000__x0000__x0000__x0000__x0000__x0000__x0000__x0000__x0000__x0000__x0000__x0000__x0000__x0000__x0000__x0000__x0000__x0000__x0000__x0000__x0000__x0000__x0000__x0000__x0000__x0000__x0000__x0000__x0000__x0000__x0000__x0000__x0000__x0000__x0000__x0000__x0000__x0000__x0000__x0000__x0000__x0000__x0000_…	Huay Peng (F)	Point	20.1333	102.299	paper	Kato-Katz	16	80	68	4	5.9
107	Laos	Prevalence of Haplorchis taichui among humans and fish in Luang Prabang Province, Lao PDR	Sohn WM, Yong TS, Eom KS, Min DY, Lee D, Jung BK, Banouvong V, Insisiengmay B, Phommasack B, Rim HJ, Chai JY	Acta Tropica	2014	136	_x0000__x0000__x0000__x0000__x0000_	74	80	community	Cross-sectional study			2007	2011	Luang Prabang Province	Nambak District	_x0000__x0000__x0000__x0000__x0000__x0000__x0000__x0000__x0000__x0000__x0000__x0000__x0000__x0000__x0000__x0000__x0000__x0000__x0000__x0000__x0000__x0000__x0000__x0000__x0000__x0000__x0000__x0000__x0000__x0000__x0000__x0000__x0000__x0000__x0000__x0000__x0000__x0000__x0000__x0000__x0000__x0000__x0000__x0000__x0000__x0000__x0000__x0000__x0000__x0000__x0000__x0000__x0000__x0000__x0000__x0000__x0000_…	Phonkeo (A)	Point	20.2442	102.376	paper	Kato-Katz	16	80	60	3	5
108	Laos	Prevalence of Haplorchis taichui among humans and fish in Luang Prabang Province, Lao PDR	Sohn WM, Yong TS, Eom KS, Min DY, Lee D, Jung BK, Banouvong V, Insisiengmay B, Phommasack B, Rim HJ, Chai JY	Acta Tropica	2014	136	_x0000__x0000__x0000__x0000__x0000_	74	80	community	Cross-sectional study			2007	2011	Luang Prabang Province	Xieng Ngeum District	_x0000__x0000__x0000__x0000__x0000__x0000__x0000__x0000__x0000__x0000__x0000__x0000__x0000__x0000__x0000__x0000__x0000__x0000__x0000__x0000__x0000__x0000__x0000__x0000__x0000__x0000__x0000__x0000__x0000__x0000__x0000__x0000__x0000__x0000__x0000__x0000__x0000__x0000__x0000__x0000__x0000__x0000__x0000__x0000__x0000__x0000__x0000__x0000__x0000__x0000__x0000__x0000__x0000__x0000__x0000__x0000__x0000_…	Long Or (I)	Point	20.2777	102.349	paper	Kato-Katz	16	80	65	18	27.6
109	Laos	Prevalence of Haplorchis taichui among humans and fish in Luang Prabang Province, Lao PDR	Sohn WM, Yong TS, Eom KS, Min DY, Lee D, Jung BK, Banouvong V, Insisiengmay B, Phommasack B, Rim HJ, Chai JY	Acta Tropica	2014	136	_x0000__x0000__x0000__x0000__x0000_	74	80	community	Cross-sectional study			2007	2011	Luang Prabang Province	Luang Prabang District	_x0000__x0000__x0000__x0000__x0000__x0000__x0000__x0000__x0000__x0000__x0000__x0000__x0000__x0000__x0000__x0000__x0000__x0000__x0000__x0000__x0000__x0000__x0000__x0000__x0000__x0000__x0000__x0000__x0000__x0000__x0000__x0000__x0000__x0000__x0000__x0000__x0000__x0000__x0000__x0000__x0000__x0000__x0000__x0000__x0000__x0000__x0000__x0000__x0000__x0000__x0000__x0000__x0000__x0000__x0000__x0000__x0000_…	Pak Pa (G)	Point	20.4553	102.318	paper	Kato-Katz	16	80	57	5	8.8
110	Laos	Prevalence of Haplorchis taichui among humans and fish in Luang Prabang Province, Lao PDR	Sohn WM, Yong TS, Eom KS, Min DY, Lee D, Jung BK, Banouvong V, Insisiengmay B, Phommasack B, Rim HJ, Chai JY	Acta Tropica	2014	136	_x0000__x0000__x0000__x0000__x0000_	74	80	community	Cross-sectional study			2007	2011	Luang Prabang Province	Xieng Ngeum District	_x0000__x0000__x0000__x0000__x0000__x0000__x0000__x0000__x0000__x0000__x0000__x0000__x0000__x0000__x0000__x0000__x0000__x0000__x0000__x0000__x0000__x0000__x0000__x0000__x0000__x0000__x0000__x0000__x0000__x0000__x0000__x0000__x0000__x0000__x0000__x0000__x0000__x0000__x0000__x0000__x0000__x0000__x0000__x0000__x0000__x0000__x0000__x0000__x0000__x0000__x0000__x0000__x0000__x0000__x0000__x0000__x0000_…	Suang Luang (J)	Point	20.6636	102.527	paper	Kato-Katz	16	80	61	6	9.8
111	Laos	Prevalence of the intestinal flukes Haplorchis taichui and H. yokogawai in a mountainous area of Phongsaly Province, Lao PDR	Chai JY, Yong TS, Eom KS, Min DY, Shin EH, Banouvong V, Insisiengmay B, Insisiengmay S, Phommasack B, Rim HJ	The Korean journal of parasitology	2010	48	4	339	342	community	Cross-sectional study	Apr	Jun	2002	2002	Phongsaly Province	Khoua District	_x0000__x0000__x0000__x0000__x0000__x0000__x0000__x0000__x0000__x0000__x0000__x0000__x0000__x0000__x0000__x0000__x0000__x0000__x0000__x0000__x0000__x0000__x0000__x0000__x0000__x0000__x0000__x0000__x0000__x0000__x0000__x0000__x0000__x0000__x0000__x0000__x0000__x0000__x0000__x0000__x0000__x0000__x0000__x0000__x0000__x0000__x0000__x0000__x0000__x0000__x0000__x0000__x0000__x0000__x0000__x0000__x0000_…	Tredsabane	Point	21.0782	102.504	google map	Kato-Katz			110	0	0
112	Laos	Prevalence of the intestinal flukes Haplorchis taichui and H. yokogawai in a mountainous area of Phongsaly Province, Lao PDR	Chai JY, Yong TS, Eom KS, Min DY, Shin EH, Banouvong V, Insisiengmay B, Insisiengmay S, Phommasack B, Rim HJ	The Korean journal of parasitology	2010	48	4	339	342	community	Cross-sectional study	Apr	Jun	2002	2002	Phongsaly Province	Khoua District	_x0000__x0000__x0000__x0000__x0000__x0000__x0000__x0000__x0000__x0000__x0000__x0000__x0000__x0000__x0000__x0000__x0000__x0000__x0000__x0000__x0000__x0000__x0000__x0000__x0000__x0000__x0000__x0000__x0000__x0000__x0000__x0000__x0000__x0000__x0000__x0000__x0000__x0000__x0000__x0000__x0000__x0000__x0000__x0000__x0000__x0000__x0000__x0000__x0000__x0000__x0000__x0000__x0000__x0000__x0000__x0000__x0000_…	Nathoune	Point	21.0789	102.502	google map	Kato-Katz			76	0	0
113	Laos	Prevalence of the intestinal flukes Haplorchis taichui and H. yokogawai in a mountainous area of Phongsaly Province, Lao PDR	Chai JY, Yong TS, Eom KS, Min DY, Shin EH, Banouvong V, Insisiengmay B, Insisiengmay S, Phommasack B, Rim HJ	The Korean journal of parasitology	2010	48	4	339	342	community	Cross-sectional study	Apr	Jun	2002	2002	Phongsaly Province	Khoua District	_x0000__x0000__x0000__x0000__x0000__x0000__x0000__x0000__x0000__x0000__x0000__x0000__x0000__x0000__x0000__x0000__x0000__x0000__x0000__x0000__x0000__x0000__x0000__x0000__x0000__x0000__x0000__x0000__x0000__x0000__x0000__x0000__x0000__x0000__x0000__x0000__x0000__x0000__x0000__x0000__x0000__x0000__x0000__x0000__x0000__x0000__x0000__x0000__x0000__x0000__x0000__x0000__x0000__x0000__x0000__x0000__x0000_…	Phonxay	Point	21.0815	102.505	google map	Kato-Katz			54	0	0
114	Laos	Prevalence of the intestinal flukes Haplorchis taichui and H. yokogawai in a mountainous area of Phongsaly Province, Lao PDR	Chai JY, Yong TS, Eom KS, Min DY, Shin EH, Banouvong V, Insisiengmay B, Insisiengmay S, Phommasack B, Rim HJ	The Korean journal of parasitology	2010	48	4	339	342	community	Cross-sectional study	Apr	Jun	2002	2002	Phongsaly Province	Khoua District	_x0000__x0000__x0000__x0000__x0000__x0000__x0000__x0000__x0000__x0000__x0000__x0000__x0000__x0000__x0000__x0000__x0000__x0000__x0000__x0000__x0000__x0000__x0000__x0000__x0000__x0000__x0000__x0000__x0000__x0000__x0000__x0000__x0000__x0000__x0000__x0000__x0000__x0000__x0000__x0000__x0000__x0000__x0000__x0000__x0000__x0000__x0000__x0000__x0000__x0000__x0000__x0000__x0000__x0000__x0000__x0000__x0000_…	Phoxayneau	Point	21.0815	102.505	google map	Kato-Katz			29	0	0
115	Laos	Risk factors for Opisthorchis viverrini and minute intestinal fluke infections in Lao PDR, 2009-2011	Yoon HJ, Ki M, Eom K, Yong T, Chai J, Min D, Rim H, Sohn W, Insisiengmay B, Phommasack B	The American journal of tropical medicine and hygiene	2014	91	2	384	388	community	Cross-sectional study	Jun	Dec	2009	2011	Champasak Province	Khong District	Khong Island	Khong Island	Point	14.1376	105.817	google map	Kato-Katz	<20	>70	280	239	85.4
116	Laos	Risk factors for Opisthorchis viverrini infection among schoolchildren in Lao PDR	Tomokawa S, Kobayashi T, Pongvongsa T, Nisaygnang B, Kaneda E, Honda S, Moji K, Boupha B	The Southeast Asian Journal of Tropical Medicine and Public Health	2012	43	3	547	585	school-based	Cross-sectional study			2005	2005	Savannakhet Province	Songkhone District	Lahanam area	Lahanam area	Point	16.2689	105.262	google map	Kato-Katz			730		63
117	Laos	Transmission of Opisthorchis viverrini, Schistosoma mekongi and soil-transmitted helminthes on the Mekong Islands, Southern Lao PDR	Vonghachack Y, Odermatt P, Taisayyavong K, Phounsavath S, Akkhavong K, Sayasone S	Infectious Diseases of Poverty	2017	6	1	131	_x0000__x0000__x0000__x0000__x0000__x0000_	community	Cross-sectional study	Oct	Aug	2011	2012	Champasack	Khong District	Done Khon island	Done Khon island	Point	13.9601	105.843	google map	Kato-Katz	2	88	475	202	42.5
118	Laos	Transmission of Opisthorchis viverrini, Schistosoma mekongi and soil-transmitted helminthes on the Mekong Islands, Southern Lao PDR	Vonghachack Y, Odermatt P, Taisayyavong K, Phounsavath S, Akkhavong K, Sayasone S	Infectious Diseases of Poverty	2017	6	1	131	_x0000__x0000__x0000__x0000__x0000__x0000_	community	Cross-sectional study	Oct	Aug	2011	2012	Champasack	Khong District	Done Som island	Done Som island	Point	14.0814	105.812	google map	Kato-Katz	2	88	519	401	77.3
119	Thailand	A comparison of a modified quick-Kato technique and the Stoll dilution method for field examination for Opisthorchis viverrini eggs	Viyanant V, Brockelman WY, Lee P, Ardsungnoen S, Upatham ES	Journal of Helminthology	1983	57	3	191	195	community	Cross-sectional study	Feb	Feb	1980	1980	Khon Kaen Province	Ban Phai District	_x0000__x0000__x0000__x0000__x0000__x0000__x0000__x0000__x0000__x0000__x0000__x0000__x0000__x0000__x0000__x0000__x0000__x0000__x0000__x0000__x0000__x0000__x0000__x0000__x0000__x0000__x0000__x0000__x0000__x0000__x0000__x0000__x0000__x0000__x0000__x0000__x0000__x0000__x0000__x0000__x0000__x0000__x0000__x0000__x0000__x0000__x0000__x0000__x0000__x0000__x0000__x0000__x0000__x0000__x0000__x0000__x0000_…	Ban Nong Ranya	Point	16.0676	102.693	google map	Combined (Kato-Katz & Stoll's)	1		221	198	89.6
120	Thailand	A Cross-Sectional Study on Intestinal Parasitic Infections in Children in Suburban Public Primary Schools, Saraburi, the Central Region of Thailand	Assavapongpaiboon B, Bunkasem U, Sanprasert V, Nuchprayoon S	The American journal of tropical medicine and hygiene	2018	98	3	763	767	community	Cross-sectional study	Feb	Sep	2016	2016	Saraburi	_x0000__x0000__x0000__x0000__x0000__x0000__x0000__x0000__x0000__x0000__x0000__x0000__x0000__x0000__x0000__x0000__x0000__x0000__x0000__x0000__x0000__x0000__x0000__x0000__x0000__x0000__x0000__x0000__x0000__x0000__x0000__x0000__x0000__x0000__x0000__x0000__x0000__x0000__x0000__x0000__x0000__x0000__x0000__x0000__x0000__x0000__x0000__x0000__x0000__x0000__x0000__x0000__x0000__x0000__x0000__x0000__x0000_	_x0000__x0000__x0000__x0000__x0000__x0000__x0000__x0000__x0000__x0000__x0000__x0000__x0000__x0000__x0000__x0000__x0000__x0000__x0000__x0000__x0000__x0000__x0000__x0000__x0000__x0000__x0000__x0000__x0000__x0000__x0000__x0000__x0000__x0000__x0000__x0000__x0000__x0000__x0000__x0000__x0000__x0000__x0000__x0000__x0000__x0000__x0000__x0000__x0000__x0000__x0000__x0000__x0000__x0000__x0000__x0000__x0000_…	Suburban Public Primary Schools (KK, BR, and HK)	Point	14.5161	100.85	google map	Combined (simple wet smear, Kato thick smear method and phosphate buffer saline (PBS) ethyl acetate concentration technique)					0.4
121	Thailand	A follow-up study of Opisthorchis viverrini infection after the implementation of control program in a rural community, central Thailand	Suwannahitatorn P, Klomjit S, Naaglor T, Taamasri P, Rangsin R, Leelayoova S, Mungthin M	Parasites & Vectors	2013	6	_x0000__x0000__x0000__x0000__x0000_	188	_x0000__x0000__x0000__x0000__x0000__x0000_	community	Cohort study	NS	NS	2007	2007	Chachengsao Province	Sanamchaikhet	_x0000__x0000__x0000__x0000__x0000__x0000__x0000__x0000__x0000__x0000__x0000__x0000__x0000__x0000__x0000__x0000__x0000__x0000__x0000__x0000__x0000__x0000__x0000__x0000__x0000__x0000__x0000__x0000__x0000__x0000__x0000__x0000__x0000__x0000__x0000__x0000__x0000__x0000__x0000__x0000__x0000__x0000__x0000__x0000__x0000__x0000__x0000__x0000__x0000__x0000__x0000__x0000__x0000__x0000__x0000__x0000__x0000_…	Nayao Village	Point	13.565	101.865	google map	FECT	0	>60	1204	224	18.6
122	Thailand	A follow-up study of Opisthorchis viverrini infection after the implementation of control program in a rural community, central Thailand	Suwannahitatorn P, Klomjit S, Naaglor T, Taamasri P, Rangsin R, Leelayoova S, Mungthin M	Parasites & Vectors	2013	6	_x0000__x0000__x0000__x0000__x0000_	188	_x0000__x0000__x0000__x0000__x0000__x0000_	community	Cohort study	NS	NS	2007	2009	Chachengsao Province	Sanamchaikhet	_x0000__x0000__x0000__x0000__x0000__x0000__x0000__x0000__x0000__x0000__x0000__x0000__x0000__x0000__x0000__x0000__x0000__x0000__x0000__x0000__x0000__x0000__x0000__x0000__x0000__x0000__x0000__x0000__x0000__x0000__x0000__x0000__x0000__x0000__x0000__x0000__x0000__x0000__x0000__x0000__x0000__x0000__x0000__x0000__x0000__x0000__x0000__x0000__x0000__x0000__x0000__x0000__x0000__x0000__x0000__x0000__x0000_…	Nayao Village	Point	13.565	101.865	google map	FECT	0	>60	793	190	23.96			364	105	28.85	429	85	19.81
123	Thailand	A New PCR-Based Approach Indicates the Range of Clonorchis sinensis Now Extends to Central Thailand	Traub RJ, Macaranas J, Mungthin M, Leelayoova S, Cribb T, Murrell KD, Thompson RC	PLOS Neglected Tropical Diseases	2009	3	1	367	_x0000__x0000__x0000__x0000__x0000__x0000_	community	Cross-sectional study	Nov	Nov	2004	2004	Chachoengsao Province	Sanamchaikhet	_x0000__x0000__x0000__x0000__x0000__x0000__x0000__x0000__x0000__x0000__x0000__x0000__x0000__x0000__x0000__x0000__x0000__x0000__x0000__x0000__x0000__x0000__x0000__x0000__x0000__x0000__x0000__x0000__x0000__x0000__x0000__x0000__x0000__x0000__x0000__x0000__x0000__x0000__x0000__x0000__x0000__x0000__x0000__x0000__x0000__x0000__x0000__x0000__x0000__x0000__x0000__x0000__x0000__x0000__x0000__x0000__x0000_…	Nayao Village	Point	13.5477	101.858	google map	Combined (Kato-Katz, Direct smear & FECT)			335	39	11.64
124	Thailand	Animation as Supplementary Learning Material About Carcinogenic Liver Fluke in Classes for Primary Schoolchildren	Bukkhunthod P, Meererksom T, Pechdee P, Ponphimai S, Khiaowichit J, Kaewpitoon N, Thueng-In K, Leng M, Namhong T, Taweepakdeechot A, Yardcharoen N, Srithongklang W, Wakhuwathapong P, Keeratibharat N, Kaewpitoon SJ	Journal of cancer education : the official journal of the American Association for Cancer Education	2020	35	1	14	21	school-based	Baseline of a follow-up treatment	Jul	Sep	2018	2018	Nakhon Ratchasima Province	_x0000__x0000__x0000__x0000__x0000__x0000__x0000__x0000__x0000__x0000__x0000__x0000__x0000__x0000__x0000__x0000__x0000__x0000__x0000__x0000__x0000__x0000__x0000__x0000__x0000__x0000__x0000__x0000__x0000__x0000__x0000__x0000__x0000__x0000__x0000__x0000__x0000__x0000__x0000__x0000__x0000__x0000__x0000__x0000__x0000__x0000__x0000__x0000__x0000__x0000__x0000__x0000__x0000__x0000__x0000__x0000__x0000_	Burapa Vittayakorn	municipal school no. 1	Point	14.974	102.112	google map	Not stated or missing	9	12	80	7	8.8
125	Thailand	Assessing the role of landscape connectivity on Opisthorchis viverrini transmission dynamics	Wang YC, Yuen R, Feng CC, Sithithaworn P, Kim IH	Parasitology International	2015	_x0000__x0000__x0000__x0000__x0000__x0000__x0000__x0000_	_x0000__x0000__x0000__x0000__x0000_	_x0000__x0000__x0000__x0000__x0000__x0000__x0000__x0000_	_x0000__x0000__x0000__x0000__x0000__x0000_	community	Cross-sectional study	_x0000__x0000__x0000__x0000__x0000__x0000__x0000__x0000__x0000__x0000_	_x0000__x0000__x0000__x0000__x0000__x0000__x0000__x0000__x0000__x0000__x0000_	2007	2007	Khon Kaen and Kalasin Province	_x0000__x0000__x0000__x0000__x0000__x0000__x0000__x0000__x0000__x0000__x0000__x0000__x0000__x0000__x0000__x0000__x0000__x0000__x0000__x0000__x0000__x0000__x0000__x0000__x0000__x0000__x0000__x0000__x0000__x0000__x0000__x0000__x0000__x0000__x0000__x0000__x0000__x0000__x0000__x0000__x0000__x0000__x0000__x0000__x0000__x0000__x0000__x0000__x0000__x0000__x0000__x0000__x0000__x0000__x0000__x0000__x0000_	Khao Noi Sub-district and Nong Paen Sub-district	Si Prathum and Nonsoon Village	Point	16.6956	102.323	google map	Not stated or missing					22
126	Thailand	Assessing the role of landscape connectivity on Opisthorchis viverrini transmission dynamics	Wang YC, Yuen R, Feng CC, Sithithaworn P, Kim IH	Parasitology International	2015	_x0000__x0000__x0000__x0000__x0000__x0000__x0000__x0000_	_x0000__x0000__x0000__x0000__x0000_	_x0000__x0000__x0000__x0000__x0000__x0000__x0000__x0000_	_x0000__x0000__x0000__x0000__x0000__x0000_	community	Cross-sectional study	_x0000__x0000__x0000__x0000__x0000__x0000__x0000__x0000__x0000__x0000_	_x0000__x0000__x0000__x0000__x0000__x0000__x0000__x0000__x0000__x0000__x0000_	2011	2011	Udon Thani Province	Nong Saeng District	_x0000__x0000__x0000__x0000__x0000__x0000__x0000__x0000__x0000__x0000__x0000__x0000__x0000__x0000__x0000__x0000__x0000__x0000__x0000__x0000__x0000__x0000__x0000__x0000__x0000__x0000__x0000__x0000__x0000__x0000__x0000__x0000__x0000__x0000__x0000__x0000__x0000__x0000__x0000__x0000__x0000__x0000__x0000__x0000__x0000__x0000__x0000__x0000__x0000__x0000__x0000__x0000__x0000__x0000__x0000__x0000__x0000_…	Saeng Sawang	Point	17.1222	102.822	google map	Not stated or missing					0
127	Thailand	Clinical field trial of praziquantel in opisthorchiasis in Nong Rangya Village, Khon Kaen Province, Thailand	Viravan C, Bunnag D, Harinasuta T, Upatham S, Kurathong S, Viyanant V	The Southeast Asian Journal of Tropical Medicine and Public Health	1986	17	1	63	66	community	Baseline of a clinical field trial					Khon Kaen Province	Amphoe Ban Phai	_x0000__x0000__x0000__x0000__x0000__x0000__x0000__x0000__x0000__x0000__x0000__x0000__x0000__x0000__x0000__x0000__x0000__x0000__x0000__x0000__x0000__x0000__x0000__x0000__x0000__x0000__x0000__x0000__x0000__x0000__x0000__x0000__x0000__x0000__x0000__x0000__x0000__x0000__x0000__x0000__x0000__x0000__x0000__x0000__x0000__x0000__x0000__x0000__x0000__x0000__x0000__x0000__x0000__x0000__x0000__x0000__x0000_…	Nong Ranya Village	Point	16.0676	102.693	google map	Not stated or missing			309	290	94
128	Thailand	Distribution patterns of Opisthorchis viverrini within a human community	Haswell-Elkins MR, Elkins DB, Sithithaworn P, Treesarawat P, Kaewkes S	Parasitology	1991	103	_x0000__x0000__x0000__x0000__x0000_	97	101	community	Baseline of a longitudinal study	Mar	Jul	1989	1989	Kalasin	_x0000__x0000__x0000__x0000__x0000__x0000__x0000__x0000__x0000__x0000__x0000__x0000__x0000__x0000__x0000__x0000__x0000__x0000__x0000__x0000__x0000__x0000__x0000__x0000__x0000__x0000__x0000__x0000__x0000__x0000__x0000__x0000__x0000__x0000__x0000__x0000__x0000__x0000__x0000__x0000__x0000__x0000__x0000__x0000__x0000__x0000__x0000__x0000__x0000__x0000__x0000__x0000__x0000__x0000__x0000__x0000__x0000_	_x0000__x0000__x0000__x0000__x0000__x0000__x0000__x0000__x0000__x0000__x0000__x0000__x0000__x0000__x0000__x0000__x0000__x0000__x0000__x0000__x0000__x0000__x0000__x0000__x0000__x0000__x0000__x0000__x0000__x0000__x0000__x0000__x0000__x0000__x0000__x0000__x0000__x0000__x0000__x0000__x0000__x0000__x0000__x0000__x0000__x0000__x0000__x0000__x0000__x0000__x0000__x0000__x0000__x0000__x0000__x0000__x0000_…	Huai Matho	Point	16.5789	103.316	google map	Kato-Katz	0	>55	486	260	53.5
129	Thailand	Enhanced neutrophil functions during Opisthorchis viverrini infections and correlation with advanced periductal fibrosis	Salao K, Spofford EM, Price C, Mairiang E, Suttiprapa S, Wright HL, Sripa B, Edwards SW	International Journal for Parasitology	2020	_x0000__x0000__x0000__x0000__x0000__x0000__x0000__x0000_	_x0000__x0000__x0000__x0000__x0000_	_x0000__x0000__x0000__x0000__x0000__x0000__x0000__x0000_	_x0000__x0000__x0000__x0000__x0000__x0000_	community	Cross-sectional study					Kalasin province	_x0000__x0000__x0000__x0000__x0000__x0000__x0000__x0000__x0000__x0000__x0000__x0000__x0000__x0000__x0000__x0000__x0000__x0000__x0000__x0000__x0000__x0000__x0000__x0000__x0000__x0000__x0000__x0000__x0000__x0000__x0000__x0000__x0000__x0000__x0000__x0000__x0000__x0000__x0000__x0000__x0000__x0000__x0000__x0000__x0000__x0000__x0000__x0000__x0000__x0000__x0000__x0000__x0000__x0000__x0000__x0000__x0000_	_x0000__x0000__x0000__x0000__x0000__x0000__x0000__x0000__x0000__x0000__x0000__x0000__x0000__x0000__x0000__x0000__x0000__x0000__x0000__x0000__x0000__x0000__x0000__x0000__x0000__x0000__x0000__x0000__x0000__x0000__x0000__x0000__x0000__x0000__x0000__x0000__x0000__x0000__x0000__x0000__x0000__x0000__x0000__x0000__x0000__x0000__x0000__x0000__x0000__x0000__x0000__x0000__x0000__x0000__x0000__x0000__x0000_…	10 villages in Bankae, Banbor, Nongtu, Nonmakum, Saadsomsri, Jikngam, Songplui, Nhonkho, Huahad, and Somhong	Point	16.2581	103.571	google map	FECT			864	234	27
130	Thailand	Environmental determinants of Opisthorchis viverrini prevalence in northeast Thailand	Wang YC, Feng CC, Sithithaworn P	Geospatial Health	2013	8	1	111	123	community	Cross-sectional study			2009	2009	Nakhon Ratchasima	Chok Chai	_x0000__x0000__x0000__x0000__x0000__x0000__x0000__x0000__x0000__x0000__x0000__x0000__x0000__x0000__x0000__x0000__x0000__x0000__x0000__x0000__x0000__x0000__x0000__x0000__x0000__x0000__x0000__x0000__x0000__x0000__x0000__x0000__x0000__x0000__x0000__x0000__x0000__x0000__x0000__x0000__x0000__x0000__x0000__x0000__x0000__x0000__x0000__x0000__x0000__x0000__x0000__x0000__x0000__x0000__x0000__x0000__x0000_…	Don Phlai	Point	14.6712	102.19	google map	Not stated or missing					0
131	Thailand	Environmental determinants of Opisthorchis viverrini prevalence in northeast Thailand	Wang YC, Feng CC, Sithithaworn P	Geospatial Health	2013	8	1	111	123	community	Cross-sectional study			2009	2009	Surin	Sikhoraphum	_x0000__x0000__x0000__x0000__x0000__x0000__x0000__x0000__x0000__x0000__x0000__x0000__x0000__x0000__x0000__x0000__x0000__x0000__x0000__x0000__x0000__x0000__x0000__x0000__x0000__x0000__x0000__x0000__x0000__x0000__x0000__x0000__x0000__x0000__x0000__x0000__x0000__x0000__x0000__x0000__x0000__x0000__x0000__x0000__x0000__x0000__x0000__x0000__x0000__x0000__x0000__x0000__x0000__x0000__x0000__x0000__x0000_…	Ban Yang	Point	14.8945	103.796	google map	Not stated or missing					24.5
132	Thailand	Environmental determinants of Opisthorchis viverrini prevalence in northeast Thailand	Wang YC, Feng CC, Sithithaworn P	Geospatial Health	2013	8	1	111	123	community	Cross-sectional study			2009	2009	Ubon Ratchathani	Trakan Phutphon	_x0000__x0000__x0000__x0000__x0000__x0000__x0000__x0000__x0000__x0000__x0000__x0000__x0000__x0000__x0000__x0000__x0000__x0000__x0000__x0000__x0000__x0000__x0000__x0000__x0000__x0000__x0000__x0000__x0000__x0000__x0000__x0000__x0000__x0000__x0000__x0000__x0000__x0000__x0000__x0000__x0000__x0000__x0000__x0000__x0000__x0000__x0000__x0000__x0000__x0000__x0000__x0000__x0000__x0000__x0000__x0000__x0000_…	Kra Dian	Point	15.6014	105.076	google map	Not stated or missing					1.9
133	Thailand	Environmental determinants of Opisthorchis viverrini prevalence in northeast Thailand	Wang YC, Feng CC, Sithithaworn P	Geospatial Health	2013	8	1	111	123	community	Cross-sectional study			2009	2009	Kalasin	Kamalasai	_x0000__x0000__x0000__x0000__x0000__x0000__x0000__x0000__x0000__x0000__x0000__x0000__x0000__x0000__x0000__x0000__x0000__x0000__x0000__x0000__x0000__x0000__x0000__x0000__x0000__x0000__x0000__x0000__x0000__x0000__x0000__x0000__x0000__x0000__x0000__x0000__x0000__x0000__x0000__x0000__x0000__x0000__x0000__x0000__x0000__x0000__x0000__x0000__x0000__x0000__x0000__x0000__x0000__x0000__x0000__x0000__x0000_…	Non Sung	Point	16.2329	103.752	google map	Not stated or missing					59.5
134	Thailand	Environmental determinants of Opisthorchis viverrini prevalence in northeast Thailand	Wang YC, Feng CC, Sithithaworn P	Geospatial Health	2013	8	1	111	123	community	Cross-sectional study		_x0000__x0000__x0000__x0000__x0000__x0000__x0000__x0000__x0000__x0000__x0000_	2009	2009	Loei	Phu Kadung	_x0000__x0000__x0000__x0000__x0000__x0000__x0000__x0000__x0000__x0000__x0000__x0000__x0000__x0000__x0000__x0000__x0000__x0000__x0000__x0000__x0000__x0000__x0000__x0000__x0000__x0000__x0000__x0000__x0000__x0000__x0000__x0000__x0000__x0000__x0000__x0000__x0000__x0000__x0000__x0000__x0000__x0000__x0000__x0000__x0000__x0000__x0000__x0000__x0000__x0000__x0000__x0000__x0000__x0000__x0000__x0000__x0000_…	Huai Pao	Point	17.1416	101.79	google map	Not stated or missing					9.5
135	Thailand	Epidemiological Investigation of Parasitic Infection of Schoolchildren from Six Elementary Schools in Sakon Nakhon Province, Thailand	Doi R, Itoh M, Chakhatrakan S, Uga S	Kobe Journal of Medical Sciences	2017	62	5	E120	E128	school-based	Cross-sectional study	Jun	Aug	2013	2014	Sakon Nakhon	Panna Nikhom	_x0000__x0000__x0000__x0000__x0000__x0000__x0000__x0000__x0000__x0000__x0000__x0000__x0000__x0000__x0000__x0000__x0000__x0000__x0000__x0000__x0000__x0000__x0000__x0000__x0000__x0000__x0000__x0000__x0000__x0000__x0000__x0000__x0000__x0000__x0000__x0000__x0000__x0000__x0000__x0000__x0000__x0000__x0000__x0000__x0000__x0000__x0000__x0000__x0000__x0000__x0000__x0000__x0000__x0000__x0000__x0000__x0000_…	B school	Point	17.1878	103.819	google map	FECT	4	12	79	0	0
136	Thailand	Epidemiological Investigation of Parasitic Infection of Schoolchildren from Six Elementary Schools in Sakon Nakhon Province, Thailand	Doi R, Itoh M, Chakhatrakan S, Uga S	Kobe Journal of Medical Sciences	2017	62	5	E120	E128	school-based	Cross-sectional study	Jun	Aug	2013	2014	Sakon Nakhon	Panna Nikhom	_x0000__x0000__x0000__x0000__x0000__x0000__x0000__x0000__x0000__x0000__x0000__x0000__x0000__x0000__x0000__x0000__x0000__x0000__x0000__x0000__x0000__x0000__x0000__x0000__x0000__x0000__x0000__x0000__x0000__x0000__x0000__x0000__x0000__x0000__x0000__x0000__x0000__x0000__x0000__x0000__x0000__x0000__x0000__x0000__x0000__x0000__x0000__x0000__x0000__x0000__x0000__x0000__x0000__x0000__x0000__x0000__x0000_…	A school	Point	17.2439	103.75	google map	FECT	4	12	70	0	0
137	Thailand	Epidemiological Investigation of Parasitic Infection of Schoolchildren from Six Elementary Schools in Sakon Nakhon Province, Thailand	Doi R, Itoh M, Chakhatrakan S, Uga S	Kobe Journal of Medical Sciences	2017	62	5	E120	E128	school-based	Cross-sectional study	Jun	Aug	2013	2014	Sakon Nakhon	Panna Nikhom	_x0000__x0000__x0000__x0000__x0000__x0000__x0000__x0000__x0000__x0000__x0000__x0000__x0000__x0000__x0000__x0000__x0000__x0000__x0000__x0000__x0000__x0000__x0000__x0000__x0000__x0000__x0000__x0000__x0000__x0000__x0000__x0000__x0000__x0000__x0000__x0000__x0000__x0000__x0000__x0000__x0000__x0000__x0000__x0000__x0000__x0000__x0000__x0000__x0000__x0000__x0000__x0000__x0000__x0000__x0000__x0000__x0000_…	C school	Point	17.2944	103.865	google map	FECT	4	12	55	3	5
138	Thailand	Epidemiological Investigation of Parasitic Infection of Schoolchildren from Six Elementary Schools in Sakon Nakhon Province, Thailand	Doi R, Itoh M, Chakhatrakan S, Uga S	Kobe Journal of Medical Sciences	2017	62	5	E120	E128	school-based	Cross-sectional study	Jun	Aug	2013	2014	Sakon Nakhon	Panna Nikhom	_x0000__x0000__x0000__x0000__x0000__x0000__x0000__x0000__x0000__x0000__x0000__x0000__x0000__x0000__x0000__x0000__x0000__x0000__x0000__x0000__x0000__x0000__x0000__x0000__x0000__x0000__x0000__x0000__x0000__x0000__x0000__x0000__x0000__x0000__x0000__x0000__x0000__x0000__x0000__x0000__x0000__x0000__x0000__x0000__x0000__x0000__x0000__x0000__x0000__x0000__x0000__x0000__x0000__x0000__x0000__x0000__x0000_…	D school	Point	17.3399	103.899	google map	FECT	4	12	28	0	0
139	Thailand	Epidemiological Investigation of Parasitic Infection of Schoolchildren from Six Elementary Schools in Sakon Nakhon Province, Thailand	Doi R, Itoh M, Chakhatrakan S, Uga S	Kobe Journal of Medical Sciences	2017	62	5	E120	E128	school-based	Cross-sectional study	Jun	Aug	2013	2014	Sakon Nakhon	Panna Nikhom	_x0000__x0000__x0000__x0000__x0000__x0000__x0000__x0000__x0000__x0000__x0000__x0000__x0000__x0000__x0000__x0000__x0000__x0000__x0000__x0000__x0000__x0000__x0000__x0000__x0000__x0000__x0000__x0000__x0000__x0000__x0000__x0000__x0000__x0000__x0000__x0000__x0000__x0000__x0000__x0000__x0000__x0000__x0000__x0000__x0000__x0000__x0000__x0000__x0000__x0000__x0000__x0000__x0000__x0000__x0000__x0000__x0000_…	E school	Point	17.4547	103.963	google map	FECT	4	12	20	1	5
140	Thailand	Epidemiological Investigation of Parasitic Infection of Schoolchildren from Six Elementary Schools in Sakon Nakhon Province, Thailand	Doi R, Itoh M, Chakhatrakan S, Uga S	Kobe Journal of Medical Sciences	2017	62	5	E120	E128	school-based	Cross-sectional study	Jun	Aug	2013	2014	Sakon Nakhon	Akat Amnuai	_x0000__x0000__x0000__x0000__x0000__x0000__x0000__x0000__x0000__x0000__x0000__x0000__x0000__x0000__x0000__x0000__x0000__x0000__x0000__x0000__x0000__x0000__x0000__x0000__x0000__x0000__x0000__x0000__x0000__x0000__x0000__x0000__x0000__x0000__x0000__x0000__x0000__x0000__x0000__x0000__x0000__x0000__x0000__x0000__x0000__x0000__x0000__x0000__x0000__x0000__x0000__x0000__x0000__x0000__x0000__x0000__x0000_…	F school	Point	17.5048	103.921	google map	FECT	4	12	165	38	23
141	Thailand	Epidemiology of Strongyloides stercoralis in north-east Thailand: application of the agar plate culture technique compared with the enzyme-linked immunosorbent assay	Sithithaworn P, Sithithaworn J, Srisawangwong T, Tesana S, Daenseekaew W, Fujimaki Y, Ando K	Transactions of the Royal Society of Tropical Medicine and Hygiene	2003	97	4	398	402	community	Cross-sectional study	Oct	Nov	2000	2000	Khon Kaen province	Waeng Noi district	_x0000__x0000__x0000__x0000__x0000__x0000__x0000__x0000__x0000__x0000__x0000__x0000__x0000__x0000__x0000__x0000__x0000__x0000__x0000__x0000__x0000__x0000__x0000__x0000__x0000__x0000__x0000__x0000__x0000__x0000__x0000__x0000__x0000__x0000__x0000__x0000__x0000__x0000__x0000__x0000__x0000__x0000__x0000__x0000__x0000__x0000__x0000__x0000__x0000__x0000__x0000__x0000__x0000__x0000__x0000__x0000__x0000_…	Nong Kae village Ban Nong Kop Won Witthaya School<U+00A0>	Point	15.8561	102.49	google map	FECT	1	71	109	20	18.3
142	Thailand	Epidemiology of Strongyloides stercoralis in north-east Thailand: application of the agar plate culture technique compared with the enzyme-linked immunosorbent assay	Sithithaworn P, Sithithaworn J, Srisawangwong T, Tesana S, Daenseekaew W, Fujimaki Y, Ando K	Transactions of the Royal Society of Tropical Medicine and Hygiene	2003	97	4	398	402	community	Cross-sectional study	Oct	Nov	2000	2000	Khon Kaen province	Chonnabot district	_x0000__x0000__x0000__x0000__x0000__x0000__x0000__x0000__x0000__x0000__x0000__x0000__x0000__x0000__x0000__x0000__x0000__x0000__x0000__x0000__x0000__x0000__x0000__x0000__x0000__x0000__x0000__x0000__x0000__x0000__x0000__x0000__x0000__x0000__x0000__x0000__x0000__x0000__x0000__x0000__x0000__x0000__x0000__x0000__x0000__x0000__x0000__x0000__x0000__x0000__x0000__x0000__x0000__x0000__x0000__x0000__x0000_…	Chonnabot village	Point	16.0884	102.628	google map	FECT	2	82	72	14	19.4
143	Thailand	Epidemiology of Strongyloides stercoralis in north-east Thailand: application of the agar plate culture technique compared with the enzyme-linked immunosorbent assay	Sithithaworn P, Sithithaworn J, Srisawangwong T, Tesana S, Daenseekaew W, Fujimaki Y, Ando K	Transactions of the Royal Society of Tropical Medicine and Hygiene	2003	97	4	398	402	community	Cross-sectional study	Oct	Nov	2000	2000	Kalasin province	Huai Mek district	_x0000__x0000__x0000__x0000__x0000__x0000__x0000__x0000__x0000__x0000__x0000__x0000__x0000__x0000__x0000__x0000__x0000__x0000__x0000__x0000__x0000__x0000__x0000__x0000__x0000__x0000__x0000__x0000__x0000__x0000__x0000__x0000__x0000__x0000__x0000__x0000__x0000__x0000__x0000__x0000__x0000__x0000__x0000__x0000__x0000__x0000__x0000__x0000__x0000__x0000__x0000__x0000__x0000__x0000__x0000__x0000__x0000_…	Haui Ma Tho village	Point	16.5786	103.319	google map	FECT	1	74	151	13	8.6
144	Thailand	Field trials in the control of Opisthorchis viverrini with an integrated programme in endemic areas of northeast Thailand	Saowakontha S, Pipitgool V, Pariyanonda S, Tesana S, Rojsathaporn K, Intarakhao C	Parasitology	1993	106	3	283	288	community	Baseline of a randomized clinical trial			1988	1988	Khon Kaen	Chang Wat	Nong Ruea	haad	Point	16.4377	102.416	google map	FECT			391	173	44.2
145	Thailand	High prevalence of Fasciolopsis buski in an endemic area of liver fluke infection in Thailand	Wiwanitkit V, Suwansaksri J, Chaiyakhun Y	MedGenMed: Medscape general medicine	2002	4	3	6	_x0000__x0000__x0000__x0000__x0000__x0000_	community	Cross-sectional study	_x0000__x0000__x0000__x0000__x0000__x0000__x0000__x0000__x0000__x0000_	_x0000__x0000__x0000__x0000__x0000__x0000__x0000__x0000__x0000__x0000__x0000_			Udonthani Province	Nam Som District	_x0000__x0000__x0000__x0000__x0000__x0000__x0000__x0000__x0000__x0000__x0000__x0000__x0000__x0000__x0000__x0000__x0000__x0000__x0000__x0000__x0000__x0000__x0000__x0000__x0000__x0000__x0000__x0000__x0000__x0000__x0000__x0000__x0000__x0000__x0000__x0000__x0000__x0000__x0000__x0000__x0000__x0000__x0000__x0000__x0000__x0000__x0000__x0000__x0000__x0000__x0000__x0000__x0000__x0000__x0000__x0000__x0000_…	Sawasdee Village/Nayoong Namsom mountain	Point	17.7677	102.187	google map	Not stated or missing			183	16	8.7
146	Thailand	Incidence and risk factors of Opisthorchis viverrini infections in a rural community in Thailand	Rangsin R, Mungthin M, Taamasri P, Mongklon S, Aimpun P, Naaglor T, Leelayoova S	The American journal of tropical medicine and hygiene	2009	81	1	152	155	community	Baseline of a longitudinal study	Dec	Dec	2002	2002	Chachengsao Province	Sanamchaikhet	_x0000__x0000__x0000__x0000__x0000__x0000__x0000__x0000__x0000__x0000__x0000__x0000__x0000__x0000__x0000__x0000__x0000__x0000__x0000__x0000__x0000__x0000__x0000__x0000__x0000__x0000__x0000__x0000__x0000__x0000__x0000__x0000__x0000__x0000__x0000__x0000__x0000__x0000__x0000__x0000__x0000__x0000__x0000__x0000__x0000__x0000__x0000__x0000__x0000__x0000__x0000__x0000__x0000__x0000__x0000__x0000__x0000_…	Nayao Village	Point	13.565	101.865	google map	FECT	0	>60	668	142	21.3
147	Thailand	Infection and re-infection rates of opisthorchiasis in the water resource development area of Nam Pong project, Khon Kaen Province, northeast Thailand	Sornmani S, Vivatanasesth P, Impand P, Phatihatakorn W, Sitabutra P, Schelp FP	Annals of tropical medicine and parasitology	1984	78	6	649	656	community	Baseline of a follow-up treatment			1981	1981	Khon Kaen	_x0000__x0000__x0000__x0000__x0000__x0000__x0000__x0000__x0000__x0000__x0000__x0000__x0000__x0000__x0000__x0000__x0000__x0000__x0000__x0000__x0000__x0000__x0000__x0000__x0000__x0000__x0000__x0000__x0000__x0000__x0000__x0000__x0000__x0000__x0000__x0000__x0000__x0000__x0000__x0000__x0000__x0000__x0000__x0000__x0000__x0000__x0000__x0000__x0000__x0000__x0000__x0000__x0000__x0000__x0000__x0000__x0000_	_x0000__x0000__x0000__x0000__x0000__x0000__x0000__x0000__x0000__x0000__x0000__x0000__x0000__x0000__x0000__x0000__x0000__x0000__x0000__x0000__x0000__x0000__x0000__x0000__x0000__x0000__x0000__x0000__x0000__x0000__x0000__x0000__x0000__x0000__x0000__x0000__x0000__x0000__x0000__x0000__x0000__x0000__x0000__x0000__x0000__x0000__x0000__x0000__x0000__x0000__x0000__x0000__x0000__x0000__x0000__x0000__x0000_…	Bung Swang	Point	16.4094	102.895	google map	Combined (MIFC and Stoll's techniques)			343	227	66.2
148	Thailand	Infection and re-infection rates of opisthorchiasis in the water resource development area of Nam Pong project, Khon Kaen Province, northeast Thailand	Sornmani S, Vivatanasesth P, Impand P, Phatihatakorn W, Sitabutra P, Schelp FP	Annals of tropical medicine and parasitology	1984	78	6	649	656	community	Baseline of a follow-up treatment	_x0000__x0000__x0000__x0000__x0000__x0000__x0000__x0000__x0000__x0000_	_x0000__x0000__x0000__x0000__x0000__x0000__x0000__x0000__x0000__x0000__x0000_	1981	1981	Khon Kaen	_x0000__x0000__x0000__x0000__x0000__x0000__x0000__x0000__x0000__x0000__x0000__x0000__x0000__x0000__x0000__x0000__x0000__x0000__x0000__x0000__x0000__x0000__x0000__x0000__x0000__x0000__x0000__x0000__x0000__x0000__x0000__x0000__x0000__x0000__x0000__x0000__x0000__x0000__x0000__x0000__x0000__x0000__x0000__x0000__x0000__x0000__x0000__x0000__x0000__x0000__x0000__x0000__x0000__x0000__x0000__x0000__x0000_	_x0000__x0000__x0000__x0000__x0000__x0000__x0000__x0000__x0000__x0000__x0000__x0000__x0000__x0000__x0000__x0000__x0000__x0000__x0000__x0000__x0000__x0000__x0000__x0000__x0000__x0000__x0000__x0000__x0000__x0000__x0000__x0000__x0000__x0000__x0000__x0000__x0000__x0000__x0000__x0000__x0000__x0000__x0000__x0000__x0000__x0000__x0000__x0000__x0000__x0000__x0000__x0000__x0000__x0000__x0000__x0000__x0000_…	Non Hua Chang	Point	16.5679	102.913	google map	Combined (MIFC and Stoll's techniques)			558	298	53.4
149	Thailand	Infection and re-infection rates of opisthorchiasis in the water resource development area of Nam Pong project, Khon Kaen Province, northeast Thailand	Sornmani S, Vivatanasesth P, Impand P, Phatihatakorn W, Sitabutra P, Schelp FP	Annals of tropical medicine and parasitology	1984	78	6	649	656	community	Baseline of a follow-up treatment	_x0000__x0000__x0000__x0000__x0000__x0000__x0000__x0000__x0000__x0000_	_x0000__x0000__x0000__x0000__x0000__x0000__x0000__x0000__x0000__x0000__x0000_	1981	1981	Khon Kaen	_x0000__x0000__x0000__x0000__x0000__x0000__x0000__x0000__x0000__x0000__x0000__x0000__x0000__x0000__x0000__x0000__x0000__x0000__x0000__x0000__x0000__x0000__x0000__x0000__x0000__x0000__x0000__x0000__x0000__x0000__x0000__x0000__x0000__x0000__x0000__x0000__x0000__x0000__x0000__x0000__x0000__x0000__x0000__x0000__x0000__x0000__x0000__x0000__x0000__x0000__x0000__x0000__x0000__x0000__x0000__x0000__x0000_	_x0000__x0000__x0000__x0000__x0000__x0000__x0000__x0000__x0000__x0000__x0000__x0000__x0000__x0000__x0000__x0000__x0000__x0000__x0000__x0000__x0000__x0000__x0000__x0000__x0000__x0000__x0000__x0000__x0000__x0000__x0000__x0000__x0000__x0000__x0000__x0000__x0000__x0000__x0000__x0000__x0000__x0000__x0000__x0000__x0000__x0000__x0000__x0000__x0000__x0000__x0000__x0000__x0000__x0000__x0000__x0000__x0000_…	Nong Sang	Point	16.6449	102.896	google map	Combined (MIFC and Stoll's techniques)			383	525	55.1
150	Thailand	Intestinal parasitic infections in hill-tribe schoolchildren in Chiang Mai, northern Thailand	Piangjai S, Sukontason K, Sukontason KL	The Southeast Asian Journal of Tropical Medicine and Public Health	2003	34	2	90	93	school-based	Cross-sectional study	_x0000__x0000__x0000__x0000__x0000__x0000__x0000__x0000__x0000__x0000_	_x0000__x0000__x0000__x0000__x0000__x0000__x0000__x0000__x0000__x0000__x0000_	1997	1998	Chiang Mai Province	Mueang district	_x0000__x0000__x0000__x0000__x0000__x0000__x0000__x0000__x0000__x0000__x0000__x0000__x0000__x0000__x0000__x0000__x0000__x0000__x0000__x0000__x0000__x0000__x0000__x0000__x0000__x0000__x0000__x0000__x0000__x0000__x0000__x0000__x0000__x0000__x0000__x0000__x0000__x0000__x0000__x0000__x0000__x0000__x0000__x0000__x0000__x0000__x0000__x0000__x0000__x0000__x0000__x0000__x0000__x0000__x0000__x0000__x0000_…	Suksa Songklao School	Point	18.8182	98.8819	google map	FECT			403	4	1.5
151	Thailand	Long-Tailed Macaques (Macaca fascicularis) in Urban Landscapes: Gastrointestinal Parasitism and Barriers for Healthy Coexistence in Northeast Thailand	Schurer JM, Ramirez V, Kyes P, Tanee T, Patarapadungkit N, Thamsenanupap P, Trufan S, Grant ET, Garland-Lewis G, Kelley S, Nueaitong H, Kyes RC, Rabinowitz P	The American journal of tropical medicine and hygiene	2019	100	2	357	364	community	Cross-sectional study					Maha Sarakham Province	_x0000__x0000__x0000__x0000__x0000__x0000__x0000__x0000__x0000__x0000__x0000__x0000__x0000__x0000__x0000__x0000__x0000__x0000__x0000__x0000__x0000__x0000__x0000__x0000__x0000__x0000__x0000__x0000__x0000__x0000__x0000__x0000__x0000__x0000__x0000__x0000__x0000__x0000__x0000__x0000__x0000__x0000__x0000__x0000__x0000__x0000__x0000__x0000__x0000__x0000__x0000__x0000__x0000__x0000__x0000__x0000__x0000_	_x0000__x0000__x0000__x0000__x0000__x0000__x0000__x0000__x0000__x0000__x0000__x0000__x0000__x0000__x0000__x0000__x0000__x0000__x0000__x0000__x0000__x0000__x0000__x0000__x0000__x0000__x0000__x0000__x0000__x0000__x0000__x0000__x0000__x0000__x0000__x0000__x0000__x0000__x0000__x0000__x0000__x0000__x0000__x0000__x0000__x0000__x0000__x0000__x0000__x0000__x0000__x0000__x0000__x0000__x0000__x0000__x0000_…	Kosumpee Forest Park	Point	16.2535	103.067	google map	Not stated or missing			115	6	5.2
152	Thailand	Measurement of incidence of the human liver fluke, Opisthorchis viverrini, in northeast Thailand	Brockelman WY, Upatham ES, Viyanant V, Hirunraks A	Transactions of the Royal Society of Tropical Medicine and Hygiene	1987	81	2	327	335	community	Cross-sectional study	Mar	Jun	1982	1982	Khon Kaen	_x0000__x0000__x0000__x0000__x0000__x0000__x0000__x0000__x0000__x0000__x0000__x0000__x0000__x0000__x0000__x0000__x0000__x0000__x0000__x0000__x0000__x0000__x0000__x0000__x0000__x0000__x0000__x0000__x0000__x0000__x0000__x0000__x0000__x0000__x0000__x0000__x0000__x0000__x0000__x0000__x0000__x0000__x0000__x0000__x0000__x0000__x0000__x0000__x0000__x0000__x0000__x0000__x0000__x0000__x0000__x0000__x0000_	_x0000__x0000__x0000__x0000__x0000__x0000__x0000__x0000__x0000__x0000__x0000__x0000__x0000__x0000__x0000__x0000__x0000__x0000__x0000__x0000__x0000__x0000__x0000__x0000__x0000__x0000__x0000__x0000__x0000__x0000__x0000__x0000__x0000__x0000__x0000__x0000__x0000__x0000__x0000__x0000__x0000__x0000__x0000__x0000__x0000__x0000__x0000__x0000__x0000__x0000__x0000__x0000__x0000__x0000__x0000__x0000__x0000_…	Chonnabot village	Point	16.0903	102.626	google map	Stoll's			1447	1282	88.6			652	588	90.2	795	694	87.3
153	Thailand	Measurement of incidence of the human liver fluke, Opisthorchis viverrini, in northeast Thailand	Brockelman WY, Upatham ES, Viyanant V, Hirunraks A	Transactions of the Royal Society of Tropical Medicine and Hygiene	1987	81	2	327	335	community	Cross-sectional study	Mar	Jun	1980	1980	Khon Kaen	_x0000__x0000__x0000__x0000__x0000__x0000__x0000__x0000__x0000__x0000__x0000__x0000__x0000__x0000__x0000__x0000__x0000__x0000__x0000__x0000__x0000__x0000__x0000__x0000__x0000__x0000__x0000__x0000__x0000__x0000__x0000__x0000__x0000__x0000__x0000__x0000__x0000__x0000__x0000__x0000__x0000__x0000__x0000__x0000__x0000__x0000__x0000__x0000__x0000__x0000__x0000__x0000__x0000__x0000__x0000__x0000__x0000_	_x0000__x0000__x0000__x0000__x0000__x0000__x0000__x0000__x0000__x0000__x0000__x0000__x0000__x0000__x0000__x0000__x0000__x0000__x0000__x0000__x0000__x0000__x0000__x0000__x0000__x0000__x0000__x0000__x0000__x0000__x0000__x0000__x0000__x0000__x0000__x0000__x0000__x0000__x0000__x0000__x0000__x0000__x0000__x0000__x0000__x0000__x0000__x0000__x0000__x0000__x0000__x0000__x0000__x0000__x0000__x0000__x0000_…	Chonnabot village	Point	16.0903	102.626	google map	Stoll's			1645	1472	89.5			755	673	89.1	890	799	89.8
154	Thailand	Measurement of incidence of the human liver fluke, Opisthorchis viverrini, in northeast Thailand	Brockelman WY, Upatham ES, Viyanant V, Hirunraks A	Transactions of the Royal Society of Tropical Medicine and Hygiene	1987	81	2	327	335	community	Cross-sectional study	Mar	Jun	1981	1981	Khon Kaen	_x0000__x0000__x0000__x0000__x0000__x0000__x0000__x0000__x0000__x0000__x0000__x0000__x0000__x0000__x0000__x0000__x0000__x0000__x0000__x0000__x0000__x0000__x0000__x0000__x0000__x0000__x0000__x0000__x0000__x0000__x0000__x0000__x0000__x0000__x0000__x0000__x0000__x0000__x0000__x0000__x0000__x0000__x0000__x0000__x0000__x0000__x0000__x0000__x0000__x0000__x0000__x0000__x0000__x0000__x0000__x0000__x0000_	_x0000__x0000__x0000__x0000__x0000__x0000__x0000__x0000__x0000__x0000__x0000__x0000__x0000__x0000__x0000__x0000__x0000__x0000__x0000__x0000__x0000__x0000__x0000__x0000__x0000__x0000__x0000__x0000__x0000__x0000__x0000__x0000__x0000__x0000__x0000__x0000__x0000__x0000__x0000__x0000__x0000__x0000__x0000__x0000__x0000__x0000__x0000__x0000__x0000__x0000__x0000__x0000__x0000__x0000__x0000__x0000__x0000_…	Chonnabot village	Point	16.0903	102.626	google map	Stoll's			1585	1466	92.5			720	669	92.9	865	797	92.1
155	Thailand	Modeling liver fluke transmission in northeast Thailand: Impacts of development, hydrology, and control	León TM, Porco TC, Kim CS, Kaewkes S, Kaewkes W, Sripa B, Spear RC	Acta Tropica	2018	188	_x0000__x0000__x0000__x0000__x0000_	101	107	community	Baseline of a follow-up treatment			2012	2012	_x0000__x0000__x0000__x0000__x0000__x0000__x0000__x0000__x0000__x0000__x0000__x0000__x0000__x0000__x0000__x0000__x0000__x0000__x0000__x0000__x0000__x0000__x0000__x0000__x0000__x0000__x0000__x0000__x0000__x0000_	Lawa Lake	_x0000__x0000__x0000__x0000__x0000__x0000__x0000__x0000__x0000__x0000__x0000__x0000__x0000__x0000__x0000__x0000__x0000__x0000__x0000__x0000__x0000__x0000__x0000__x0000__x0000__x0000__x0000__x0000__x0000__x0000__x0000__x0000__x0000__x0000__x0000__x0000__x0000__x0000__x0000__x0000__x0000__x0000__x0000__x0000__x0000__x0000__x0000__x0000__x0000__x0000__x0000__x0000__x0000__x0000__x0000__x0000__x0000_…	NNK Village Cluster	Point	16.1003	102.682	google map	Not stated or missing					50
156	Thailand	Modeling liver fluke transmission in northeast Thailand: Impacts of development, hydrology, and control	León TM, Porco TC, Kim CS, Kaewkes S, Kaewkes W, Sripa B, Spear RC	Acta Tropica	2018	188	_x0000__x0000__x0000__x0000__x0000_	101	107	community	Baseline of a follow-up treatment			2008	2008	_x0000__x0000__x0000__x0000__x0000__x0000__x0000__x0000__x0000__x0000__x0000__x0000__x0000__x0000__x0000__x0000__x0000__x0000__x0000__x0000__x0000__x0000__x0000__x0000__x0000__x0000__x0000__x0000__x0000__x0000_	Lawa Lake	_x0000__x0000__x0000__x0000__x0000__x0000__x0000__x0000__x0000__x0000__x0000__x0000__x0000__x0000__x0000__x0000__x0000__x0000__x0000__x0000__x0000__x0000__x0000__x0000__x0000__x0000__x0000__x0000__x0000__x0000__x0000__x0000__x0000__x0000__x0000__x0000__x0000__x0000__x0000__x0000__x0000__x0000__x0000__x0000__x0000__x0000__x0000__x0000__x0000__x0000__x0000__x0000__x0000__x0000__x0000__x0000__x0000_…	NNK Village Cluster	Point	16.1003	102.682	google map	Not stated or missing					74.1
157	Thailand	Modeling liver fluke transmission in northeast Thailand: Impacts of development, hydrology, and control	León TM, Porco TC, Kim CS, Kaewkes S, Kaewkes W, Sripa B, Spear RC	Acta Tropica	2018	188	_x0000__x0000__x0000__x0000__x0000_	101	107	community	Baseline of a follow-up treatment			2010	2010	_x0000__x0000__x0000__x0000__x0000__x0000__x0000__x0000__x0000__x0000__x0000__x0000__x0000__x0000__x0000__x0000__x0000__x0000__x0000__x0000__x0000__x0000__x0000__x0000__x0000__x0000__x0000__x0000__x0000__x0000_	Lawa Lake	_x0000__x0000__x0000__x0000__x0000__x0000__x0000__x0000__x0000__x0000__x0000__x0000__x0000__x0000__x0000__x0000__x0000__x0000__x0000__x0000__x0000__x0000__x0000__x0000__x0000__x0000__x0000__x0000__x0000__x0000__x0000__x0000__x0000__x0000__x0000__x0000__x0000__x0000__x0000__x0000__x0000__x0000__x0000__x0000__x0000__x0000__x0000__x0000__x0000__x0000__x0000__x0000__x0000__x0000__x0000__x0000__x0000_…	Lawa Village Cluster	Point	16.1283	102.65	google map	Not stated or missing					63.1
158	Thailand	Modeling liver fluke transmission in northeast Thailand: Impacts of development, hydrology, and control	León TM, Porco TC, Kim CS, Kaewkes S, Kaewkes W, Sripa B, Spear RC	Acta Tropica	2018	188	_x0000__x0000__x0000__x0000__x0000_	101	107	community	Baseline of a follow-up treatment			2008	2008	_x0000__x0000__x0000__x0000__x0000__x0000__x0000__x0000__x0000__x0000__x0000__x0000__x0000__x0000__x0000__x0000__x0000__x0000__x0000__x0000__x0000__x0000__x0000__x0000__x0000__x0000__x0000__x0000__x0000__x0000_	Lawa Lake	_x0000__x0000__x0000__x0000__x0000__x0000__x0000__x0000__x0000__x0000__x0000__x0000__x0000__x0000__x0000__x0000__x0000__x0000__x0000__x0000__x0000__x0000__x0000__x0000__x0000__x0000__x0000__x0000__x0000__x0000__x0000__x0000__x0000__x0000__x0000__x0000__x0000__x0000__x0000__x0000__x0000__x0000__x0000__x0000__x0000__x0000__x0000__x0000__x0000__x0000__x0000__x0000__x0000__x0000__x0000__x0000__x0000_…	Lawa Village Cluster	Point	16.1283	102.65	google map	Not stated or missing					67.1
159	Thailand	Modeling liver fluke transmission in northeast Thailand: Impacts of development, hydrology, and control	León TM, Porco TC, Kim CS, Kaewkes S, Kaewkes W, Sripa B, Spear RC	Acta Tropica	2018	188	_x0000__x0000__x0000__x0000__x0000_	101	107	community	Baseline of a follow-up treatment			2012	2012	_x0000__x0000__x0000__x0000__x0000__x0000__x0000__x0000__x0000__x0000__x0000__x0000__x0000__x0000__x0000__x0000__x0000__x0000__x0000__x0000__x0000__x0000__x0000__x0000__x0000__x0000__x0000__x0000__x0000__x0000_	Lawa Lake	_x0000__x0000__x0000__x0000__x0000__x0000__x0000__x0000__x0000__x0000__x0000__x0000__x0000__x0000__x0000__x0000__x0000__x0000__x0000__x0000__x0000__x0000__x0000__x0000__x0000__x0000__x0000__x0000__x0000__x0000__x0000__x0000__x0000__x0000__x0000__x0000__x0000__x0000__x0000__x0000__x0000__x0000__x0000__x0000__x0000__x0000__x0000__x0000__x0000__x0000__x0000__x0000__x0000__x0000__x0000__x0000__x0000_…	BT Village Cluster	Point	16.1314	102.68	google map	Not stated or missing					35
160	Thailand	Modeling liver fluke transmission in northeast Thailand: Impacts of development, hydrology, and control	León TM, Porco TC, Kim CS, Kaewkes S, Kaewkes W, Sripa B, Spear RC	Acta Tropica	2018	188	_x0000__x0000__x0000__x0000__x0000_	101	107	community	Baseline of a follow-up treatment			2008	2008	_x0000__x0000__x0000__x0000__x0000__x0000__x0000__x0000__x0000__x0000__x0000__x0000__x0000__x0000__x0000__x0000__x0000__x0000__x0000__x0000__x0000__x0000__x0000__x0000__x0000__x0000__x0000__x0000__x0000__x0000_	Lawa Lake	_x0000__x0000__x0000__x0000__x0000__x0000__x0000__x0000__x0000__x0000__x0000__x0000__x0000__x0000__x0000__x0000__x0000__x0000__x0000__x0000__x0000__x0000__x0000__x0000__x0000__x0000__x0000__x0000__x0000__x0000__x0000__x0000__x0000__x0000__x0000__x0000__x0000__x0000__x0000__x0000__x0000__x0000__x0000__x0000__x0000__x0000__x0000__x0000__x0000__x0000__x0000__x0000__x0000__x0000__x0000__x0000__x0000_…	BT Village Cluster	Point	16.1314	102.68	google map	Not stated or missing					61.9
161	Thailand	Modeling liver fluke transmission in northeast Thailand: Impacts of development, hydrology, and control	León TM, Porco TC, Kim CS, Kaewkes S, Kaewkes W, Sripa B, Spear RC	Acta Tropica	2018	188	_x0000__x0000__x0000__x0000__x0000_	101	107	community	Baseline of a follow-up treatment			2010	2010	_x0000__x0000__x0000__x0000__x0000__x0000__x0000__x0000__x0000__x0000__x0000__x0000__x0000__x0000__x0000__x0000__x0000__x0000__x0000__x0000__x0000__x0000__x0000__x0000__x0000__x0000__x0000__x0000__x0000__x0000_	Lawa Lake	_x0000__x0000__x0000__x0000__x0000__x0000__x0000__x0000__x0000__x0000__x0000__x0000__x0000__x0000__x0000__x0000__x0000__x0000__x0000__x0000__x0000__x0000__x0000__x0000__x0000__x0000__x0000__x0000__x0000__x0000__x0000__x0000__x0000__x0000__x0000__x0000__x0000__x0000__x0000__x0000__x0000__x0000__x0000__x0000__x0000__x0000__x0000__x0000__x0000__x0000__x0000__x0000__x0000__x0000__x0000__x0000__x0000_…	BT Village Cluster	Point	16.1314	102.68	google map	Not stated or missing					37.2
162	Thailand	Modeling liver fluke transmission in northeast Thailand: Impacts of development, hydrology, and control	León TM, Porco TC, Kim CS, Kaewkes S, Kaewkes W, Sripa B, Spear RC	Acta Tropica	2018	188	_x0000__x0000__x0000__x0000__x0000_	101	107	community	Baseline of a follow-up treatment			2010	2010	_x0000__x0000__x0000__x0000__x0000__x0000__x0000__x0000__x0000__x0000__x0000__x0000__x0000__x0000__x0000__x0000__x0000__x0000__x0000__x0000__x0000__x0000__x0000__x0000__x0000__x0000__x0000__x0000__x0000__x0000_	Lawa Lake	_x0000__x0000__x0000__x0000__x0000__x0000__x0000__x0000__x0000__x0000__x0000__x0000__x0000__x0000__x0000__x0000__x0000__x0000__x0000__x0000__x0000__x0000__x0000__x0000__x0000__x0000__x0000__x0000__x0000__x0000__x0000__x0000__x0000__x0000__x0000__x0000__x0000__x0000__x0000__x0000__x0000__x0000__x0000__x0000__x0000__x0000__x0000__x0000__x0000__x0000__x0000__x0000__x0000__x0000__x0000__x0000__x0000_…	DPD Village Cluster	Point	16.1588	102.708	google map	Not stated or missing					36.5
163	Thailand	Modeling liver fluke transmission in northeast Thailand: Impacts of development, hydrology, and control	León TM, Porco TC, Kim CS, Kaewkes S, Kaewkes W, Sripa B, Spear RC	Acta Tropica	2018	188	_x0000__x0000__x0000__x0000__x0000_	101	107	community	Baseline of a follow-up treatment			2008	2008	_x0000__x0000__x0000__x0000__x0000__x0000__x0000__x0000__x0000__x0000__x0000__x0000__x0000__x0000__x0000__x0000__x0000__x0000__x0000__x0000__x0000__x0000__x0000__x0000__x0000__x0000__x0000__x0000__x0000__x0000_	Lawa Lake	_x0000__x0000__x0000__x0000__x0000__x0000__x0000__x0000__x0000__x0000__x0000__x0000__x0000__x0000__x0000__x0000__x0000__x0000__x0000__x0000__x0000__x0000__x0000__x0000__x0000__x0000__x0000__x0000__x0000__x0000__x0000__x0000__x0000__x0000__x0000__x0000__x0000__x0000__x0000__x0000__x0000__x0000__x0000__x0000__x0000__x0000__x0000__x0000__x0000__x0000__x0000__x0000__x0000__x0000__x0000__x0000__x0000_…	DPD Village Cluster	Point	16.1588	102.708	google map	Not stated or missing					22.1
164	Thailand	Modeling liver fluke transmission in northeast Thailand: Impacts of development, hydrology, and control	León TM, Porco TC, Kim CS, Kaewkes S, Kaewkes W, Sripa B, Spear RC	Acta Tropica	2018	188	_x0000__x0000__x0000__x0000__x0000_	101	107	community	Baseline of a follow-up treatment			2008	2008	_x0000__x0000__x0000__x0000__x0000__x0000__x0000__x0000__x0000__x0000__x0000__x0000__x0000__x0000__x0000__x0000__x0000__x0000__x0000__x0000__x0000__x0000__x0000__x0000__x0000__x0000__x0000__x0000__x0000__x0000_	Lawa Lake	_x0000__x0000__x0000__x0000__x0000__x0000__x0000__x0000__x0000__x0000__x0000__x0000__x0000__x0000__x0000__x0000__x0000__x0000__x0000__x0000__x0000__x0000__x0000__x0000__x0000__x0000__x0000__x0000__x0000__x0000__x0000__x0000__x0000__x0000__x0000__x0000__x0000__x0000__x0000__x0000__x0000__x0000__x0000__x0000__x0000__x0000__x0000__x0000__x0000__x0000__x0000__x0000__x0000__x0000__x0000__x0000__x0000_…	CCK Village Cluster	Point	16.1638	102.66	google map	Not stated or missing					54.9
165	Thailand	Modeling liver fluke transmission in northeast Thailand: Impacts of development, hydrology, and control	León TM, Porco TC, Kim CS, Kaewkes S, Kaewkes W, Sripa B, Spear RC	Acta Tropica	2018	188	_x0000__x0000__x0000__x0000__x0000_	101	107	community	Baseline of a follow-up treatment			2012	2012	_x0000__x0000__x0000__x0000__x0000__x0000__x0000__x0000__x0000__x0000__x0000__x0000__x0000__x0000__x0000__x0000__x0000__x0000__x0000__x0000__x0000__x0000__x0000__x0000__x0000__x0000__x0000__x0000__x0000__x0000_	Lawa Lake	_x0000__x0000__x0000__x0000__x0000__x0000__x0000__x0000__x0000__x0000__x0000__x0000__x0000__x0000__x0000__x0000__x0000__x0000__x0000__x0000__x0000__x0000__x0000__x0000__x0000__x0000__x0000__x0000__x0000__x0000__x0000__x0000__x0000__x0000__x0000__x0000__x0000__x0000__x0000__x0000__x0000__x0000__x0000__x0000__x0000__x0000__x0000__x0000__x0000__x0000__x0000__x0000__x0000__x0000__x0000__x0000__x0000_…	CCK Village Cluster	Point	16.1638	102.66	google map	Not stated or missing					44.3
166	Thailand	Modeling liver fluke transmission in northeast Thailand: Impacts of development, hydrology, and control	León TM, Porco TC, Kim CS, Kaewkes S, Kaewkes W, Sripa B, Spear RC	Acta Tropica	2018	188	_x0000__x0000__x0000__x0000__x0000_	101	107	community	Baseline of a follow-up treatment			2008	2008	_x0000__x0000__x0000__x0000__x0000__x0000__x0000__x0000__x0000__x0000__x0000__x0000__x0000__x0000__x0000__x0000__x0000__x0000__x0000__x0000__x0000__x0000__x0000__x0000__x0000__x0000__x0000__x0000__x0000__x0000_	Lawa Lake	_x0000__x0000__x0000__x0000__x0000__x0000__x0000__x0000__x0000__x0000__x0000__x0000__x0000__x0000__x0000__x0000__x0000__x0000__x0000__x0000__x0000__x0000__x0000__x0000__x0000__x0000__x0000__x0000__x0000__x0000__x0000__x0000__x0000__x0000__x0000__x0000__x0000__x0000__x0000__x0000__x0000__x0000__x0000__x0000__x0000__x0000__x0000__x0000__x0000__x0000__x0000__x0000__x0000__x0000__x0000__x0000__x0000_…	KSR Village Cluster	Point	16.1772	102.698	google map	Not stated or missing					16.4
167	Thailand	Molecular discrimination of Opisthorchis-like eggs from residents in a rural community of central Thailand	Buathong S, Leelayoova S, Mungthin M, Ruang-Areerate T, Naaglor T, Suwannahitatorn P, Piyaraj P, Taamasri P, Tan-Ariya P	PLOS Neglected Tropical Diseases	2017	11	11	e0006030	_x0000__x0000__x0000__x0000__x0000__x0000_	community	Cross-sectional study	Feb	Feb	2013	2013	Chachoengsao	Sanam Chai Khet	_x0000__x0000__x0000__x0000__x0000__x0000__x0000__x0000__x0000__x0000__x0000__x0000__x0000__x0000__x0000__x0000__x0000__x0000__x0000__x0000__x0000__x0000__x0000__x0000__x0000__x0000__x0000__x0000__x0000__x0000__x0000__x0000__x0000__x0000__x0000__x0000__x0000__x0000__x0000__x0000__x0000__x0000__x0000__x0000__x0000__x0000__x0000__x0000__x0000__x0000__x0000__x0000__x0000__x0000__x0000__x0000__x0000_…	Na-Yao	Point	13.5479	101.858	google map	Combined (simple wet smear, Kato thick smear method and phosphate buffer saline (PBS) ethyl acetate concentration technique)			1062	130	12.2
168	Thailand	Molecular discrimination of Opisthorchis-like eggs from residents in a rural community of central Thailand	Buathong S, Leelayoova S, Mungthin M, Ruang-Areerate T, Naaglor T, Suwannahitatorn P, Piyaraj P, Taamasri P, Tan-Ariya P	PLOS Neglected Tropical Diseases	2017	11	11	e0006030	_x0000__x0000__x0000__x0000__x0000__x0000_	community	Cross-sectional study	Feb	Sep	2008	2008	Chachoengsao	Sanam Chai Khet	_x0000__x0000__x0000__x0000__x0000__x0000__x0000__x0000__x0000__x0000__x0000__x0000__x0000__x0000__x0000__x0000__x0000__x0000__x0000__x0000__x0000__x0000__x0000__x0000__x0000__x0000__x0000__x0000__x0000__x0000__x0000__x0000__x0000__x0000__x0000__x0000__x0000__x0000__x0000__x0000__x0000__x0000__x0000__x0000__x0000__x0000__x0000__x0000__x0000__x0000__x0000__x0000__x0000__x0000__x0000__x0000__x0000_…	Na-Ngam	Point	13.657	101.651	google map	Combined (simple wet smear, Kato thick smear method and phosphate buffer saline (PBS) ethyl acetate concentration technique)			858	222	25.9
169	Thailand	Molecular discrimination of Opisthorchis-like eggs from residents in a rural community of central Thailand	Buathong S, Leelayoova S, Mungthin M, Ruang-Areerate T, Naaglor T, Suwannahitatorn P, Piyaraj P, Taamasri P, Tan-Ariya P	PLOS Neglected Tropical Diseases	2017	11	11	e0006030	_x0000__x0000__x0000__x0000__x0000__x0000_	community	Cross-sectional study	Feb	Sep	2008	2008	Chachoengsao	Sanam Chai Khet	_x0000__x0000__x0000__x0000__x0000__x0000__x0000__x0000__x0000__x0000__x0000__x0000__x0000__x0000__x0000__x0000__x0000__x0000__x0000__x0000__x0000__x0000__x0000__x0000__x0000__x0000__x0000__x0000__x0000__x0000__x0000__x0000__x0000__x0000__x0000__x0000__x0000__x0000__x0000__x0000__x0000__x0000__x0000__x0000__x0000__x0000__x0000__x0000__x0000__x0000__x0000__x0000__x0000__x0000__x0000__x0000__x0000_…	Thoong-Heang	Point	13.6602	101.691	google map	Combined (simple wet smear, Kato thick smear method and phosphate buffer saline (PBS) ethyl acetate concentration technique)			689	87	12.6
170	Thailand	Morbidity in relation to intensity of infection in Opisthorchiasis viverrini: study of a community in Khon Kaen, Thailand	Upatham ES, Viyanant V, Kurathong S, Brockelman WY, Menaruchi A, Saowakontha S, Intarakhao C, Vajrasthira S, Warren KS	The American journal of tropical medicine and hygiene	1982	31	6	1156	1163	community	Cross-sectional study			1981	1981	Khon Kaen	Ban Phai	Tambon Hua Nong	Nong Ranya	Point	16.0676	102.693	google map	Stoll's			309		94
171	Thailand	Parasitic infections in relation to practices and knowledge in a rural village in Northern Thailand with emphasis on fish-borne trematode infection	Chaisiri K, Jollivet C, Della Rossa P, Sanguankiat S, Wattanakulpanich D, Lajaunie C, Binot A, Tanita M, Rattanapikul S, Sutdan D, Morand S, Ribas A	Epidemiology & Infection	2019	147	_x0000__x0000__x0000__x0000__x0000_	_x0000__x0000__x0000__x0000__x0000__x0000__x0000__x0000_	_x0000__x0000__x0000__x0000__x0000__x0000_	community	Cross-sectional study	Nov	Nov	2012	2012	Nan Province	Tha Wang Pha District	_x0000__x0000__x0000__x0000__x0000__x0000__x0000__x0000__x0000__x0000__x0000__x0000__x0000__x0000__x0000__x0000__x0000__x0000__x0000__x0000__x0000__x0000__x0000__x0000__x0000__x0000__x0000__x0000__x0000__x0000__x0000__x0000__x0000__x0000__x0000__x0000__x0000__x0000__x0000__x0000__x0000__x0000__x0000__x0000__x0000__x0000__x0000__x0000__x0000__x0000__x0000__x0000__x0000__x0000__x0000__x0000__x0000_…	Huay Muang village	Point	19.2333	101.2	paper	Kato-Katz	<30	>50	228	103	45.2
172	Thailand	Potential health hazards of the water resources development: a health survey in the Phitsanulok Irrigation Project, Nan River Basin, Northern Thailand	Bunnag T, Sornmani S, Impand P, Harinasuta C	The Southeast Asian Journal of Tropical Medicine and Public Health	1980	11	4	559	565	community	Cross-sectional study			1977	1978	Phitsanulok/Phichit	_x0000__x0000__x0000__x0000__x0000__x0000__x0000__x0000__x0000__x0000__x0000__x0000__x0000__x0000__x0000__x0000__x0000__x0000__x0000__x0000__x0000__x0000__x0000__x0000__x0000__x0000__x0000__x0000__x0000__x0000__x0000__x0000__x0000__x0000__x0000__x0000__x0000__x0000__x0000__x0000__x0000__x0000__x0000__x0000__x0000__x0000__x0000__x0000__x0000__x0000__x0000__x0000__x0000__x0000__x0000__x0000__x0000_	_x0000__x0000__x0000__x0000__x0000__x0000__x0000__x0000__x0000__x0000__x0000__x0000__x0000__x0000__x0000__x0000__x0000__x0000__x0000__x0000__x0000__x0000__x0000__x0000__x0000__x0000__x0000__x0000__x0000__x0000__x0000__x0000__x0000__x0000__x0000__x0000__x0000__x0000__x0000__x0000__x0000__x0000__x0000__x0000__x0000__x0000__x0000__x0000__x0000__x0000__x0000__x0000__x0000__x0000__x0000__x0000__x0000_…	Khao Phra	Point	16.1264	100.607	google map	FECT			16		56
173	Thailand	Potential health hazards of the water resources development: a health survey in the Phitsanulok Irrigation Project, Nan River Basin, Northern Thailand	Bunnag T, Sornmani S, Impand P, Harinasuta C	The Southeast Asian Journal of Tropical Medicine and Public Health	1980	11	4	559	565	community	Cross-sectional study			1977	1978	Phitsanulok/Phichit	_x0000__x0000__x0000__x0000__x0000__x0000__x0000__x0000__x0000__x0000__x0000__x0000__x0000__x0000__x0000__x0000__x0000__x0000__x0000__x0000__x0000__x0000__x0000__x0000__x0000__x0000__x0000__x0000__x0000__x0000__x0000__x0000__x0000__x0000__x0000__x0000__x0000__x0000__x0000__x0000__x0000__x0000__x0000__x0000__x0000__x0000__x0000__x0000__x0000__x0000__x0000__x0000__x0000__x0000__x0000__x0000__x0000_	_x0000__x0000__x0000__x0000__x0000__x0000__x0000__x0000__x0000__x0000__x0000__x0000__x0000__x0000__x0000__x0000__x0000__x0000__x0000__x0000__x0000__x0000__x0000__x0000__x0000__x0000__x0000__x0000__x0000__x0000__x0000__x0000__x0000__x0000__x0000__x0000__x0000__x0000__x0000__x0000__x0000__x0000__x0000__x0000__x0000__x0000__x0000__x0000__x0000__x0000__x0000__x0000__x0000__x0000__x0000__x0000__x0000_…	Phai Luang	Point	16.1735	100.395	google map	FECT			28		39
174	Thailand	Potential health hazards of the water resources development: a health survey in the Phitsanulok Irrigation Project, Nan River Basin, Northern Thailand	Bunnag T, Sornmani S, Impand P, Harinasuta C	The Southeast Asian Journal of Tropical Medicine and Public Health	1980	11	4	559	565	community	Cross-sectional study			1977	1978	Phitsanulok/Phichit	_x0000__x0000__x0000__x0000__x0000__x0000__x0000__x0000__x0000__x0000__x0000__x0000__x0000__x0000__x0000__x0000__x0000__x0000__x0000__x0000__x0000__x0000__x0000__x0000__x0000__x0000__x0000__x0000__x0000__x0000__x0000__x0000__x0000__x0000__x0000__x0000__x0000__x0000__x0000__x0000__x0000__x0000__x0000__x0000__x0000__x0000__x0000__x0000__x0000__x0000__x0000__x0000__x0000__x0000__x0000__x0000__x0000_	_x0000__x0000__x0000__x0000__x0000__x0000__x0000__x0000__x0000__x0000__x0000__x0000__x0000__x0000__x0000__x0000__x0000__x0000__x0000__x0000__x0000__x0000__x0000__x0000__x0000__x0000__x0000__x0000__x0000__x0000__x0000__x0000__x0000__x0000__x0000__x0000__x0000__x0000__x0000__x0000__x0000__x0000__x0000__x0000__x0000__x0000__x0000__x0000__x0000__x0000__x0000__x0000__x0000__x0000__x0000__x0000__x0000_…	Wat Tap Tim	Point	16.1763	100.231	google map	FECT			48		50
175	Thailand	Potential health hazards of the water resources development: a health survey in the Phitsanulok Irrigation Project, Nan River Basin, Northern Thailand	Bunnag T, Sornmani S, Impand P, Harinasuta C	The Southeast Asian Journal of Tropical Medicine and Public Health	1980	11	4	559	565	community	Cross-sectional study			1977	1978	Phitsanulok/Phichit	_x0000__x0000__x0000__x0000__x0000__x0000__x0000__x0000__x0000__x0000__x0000__x0000__x0000__x0000__x0000__x0000__x0000__x0000__x0000__x0000__x0000__x0000__x0000__x0000__x0000__x0000__x0000__x0000__x0000__x0000__x0000__x0000__x0000__x0000__x0000__x0000__x0000__x0000__x0000__x0000__x0000__x0000__x0000__x0000__x0000__x0000__x0000__x0000__x0000__x0000__x0000__x0000__x0000__x0000__x0000__x0000__x0000_	_x0000__x0000__x0000__x0000__x0000__x0000__x0000__x0000__x0000__x0000__x0000__x0000__x0000__x0000__x0000__x0000__x0000__x0000__x0000__x0000__x0000__x0000__x0000__x0000__x0000__x0000__x0000__x0000__x0000__x0000__x0000__x0000__x0000__x0000__x0000__x0000__x0000__x0000__x0000__x0000__x0000__x0000__x0000__x0000__x0000__x0000__x0000__x0000__x0000__x0000__x0000__x0000__x0000__x0000__x0000__x0000__x0000_…	Wang Tabua	Point	16.2155	100.238	google map	FECT			33		9
176	Thailand	Potential health hazards of the water resources development: a health survey in the Phitsanulok Irrigation Project, Nan River Basin, Northern Thailand	Bunnag T, Sornmani S, Impand P, Harinasuta C	The Southeast Asian Journal of Tropical Medicine and Public Health	1980	11	4	559	565	community	Cross-sectional study			1977	1978	Phitsanulok/Phichit	_x0000__x0000__x0000__x0000__x0000__x0000__x0000__x0000__x0000__x0000__x0000__x0000__x0000__x0000__x0000__x0000__x0000__x0000__x0000__x0000__x0000__x0000__x0000__x0000__x0000__x0000__x0000__x0000__x0000__x0000__x0000__x0000__x0000__x0000__x0000__x0000__x0000__x0000__x0000__x0000__x0000__x0000__x0000__x0000__x0000__x0000__x0000__x0000__x0000__x0000__x0000__x0000__x0000__x0000__x0000__x0000__x0000_	_x0000__x0000__x0000__x0000__x0000__x0000__x0000__x0000__x0000__x0000__x0000__x0000__x0000__x0000__x0000__x0000__x0000__x0000__x0000__x0000__x0000__x0000__x0000__x0000__x0000__x0000__x0000__x0000__x0000__x0000__x0000__x0000__x0000__x0000__x0000__x0000__x0000__x0000__x0000__x0000__x0000__x0000__x0000__x0000__x0000__x0000__x0000__x0000__x0000__x0000__x0000__x0000__x0000__x0000__x0000__x0000__x0000_…	Huai Khot	Point	16.2171	100.423	google map	FECT			56		23
177	Thailand	Potential health hazards of the water resources development: a health survey in the Phitsanulok Irrigation Project, Nan River Basin, Northern Thailand	Bunnag T, Sornmani S, Impand P, Harinasuta C	The Southeast Asian Journal of Tropical Medicine and Public Health	1980	11	4	559	565	community	Cross-sectional study			1977	1978	Phitsanulok/Phichit	_x0000__x0000__x0000__x0000__x0000__x0000__x0000__x0000__x0000__x0000__x0000__x0000__x0000__x0000__x0000__x0000__x0000__x0000__x0000__x0000__x0000__x0000__x0000__x0000__x0000__x0000__x0000__x0000__x0000__x0000__x0000__x0000__x0000__x0000__x0000__x0000__x0000__x0000__x0000__x0000__x0000__x0000__x0000__x0000__x0000__x0000__x0000__x0000__x0000__x0000__x0000__x0000__x0000__x0000__x0000__x0000__x0000_	_x0000__x0000__x0000__x0000__x0000__x0000__x0000__x0000__x0000__x0000__x0000__x0000__x0000__x0000__x0000__x0000__x0000__x0000__x0000__x0000__x0000__x0000__x0000__x0000__x0000__x0000__x0000__x0000__x0000__x0000__x0000__x0000__x0000__x0000__x0000__x0000__x0000__x0000__x0000__x0000__x0000__x0000__x0000__x0000__x0000__x0000__x0000__x0000__x0000__x0000__x0000__x0000__x0000__x0000__x0000__x0000__x0000_…	Tha Put Sa	Point	16.2202	100.418	google map	FECT			18		11
178	Thailand	Potential health hazards of the water resources development: a health survey in the Phitsanulok Irrigation Project, Nan River Basin, Northern Thailand	Bunnag T, Sornmani S, Impand P, Harinasuta C	The Southeast Asian Journal of Tropical Medicine and Public Health	1980	11	4	559	565	community	Cross-sectional study			1977	1978	Phitsanulok/Phichit	_x0000__x0000__x0000__x0000__x0000__x0000__x0000__x0000__x0000__x0000__x0000__x0000__x0000__x0000__x0000__x0000__x0000__x0000__x0000__x0000__x0000__x0000__x0000__x0000__x0000__x0000__x0000__x0000__x0000__x0000__x0000__x0000__x0000__x0000__x0000__x0000__x0000__x0000__x0000__x0000__x0000__x0000__x0000__x0000__x0000__x0000__x0000__x0000__x0000__x0000__x0000__x0000__x0000__x0000__x0000__x0000__x0000_	_x0000__x0000__x0000__x0000__x0000__x0000__x0000__x0000__x0000__x0000__x0000__x0000__x0000__x0000__x0000__x0000__x0000__x0000__x0000__x0000__x0000__x0000__x0000__x0000__x0000__x0000__x0000__x0000__x0000__x0000__x0000__x0000__x0000__x0000__x0000__x0000__x0000__x0000__x0000__x0000__x0000__x0000__x0000__x0000__x0000__x0000__x0000__x0000__x0000__x0000__x0000__x0000__x0000__x0000__x0000__x0000__x0000_…	Wang Wai	Point	16.2232	100.373	google map	FECT			35		77
179	Thailand	Potential health hazards of the water resources development: a health survey in the Phitsanulok Irrigation Project, Nan River Basin, Northern Thailand	Bunnag T, Sornmani S, Impand P, Harinasuta C	The Southeast Asian Journal of Tropical Medicine and Public Health	1980	11	4	559	565	community	Cross-sectional study			1977	1978	Phitsanulok/Phichit	_x0000__x0000__x0000__x0000__x0000__x0000__x0000__x0000__x0000__x0000__x0000__x0000__x0000__x0000__x0000__x0000__x0000__x0000__x0000__x0000__x0000__x0000__x0000__x0000__x0000__x0000__x0000__x0000__x0000__x0000__x0000__x0000__x0000__x0000__x0000__x0000__x0000__x0000__x0000__x0000__x0000__x0000__x0000__x0000__x0000__x0000__x0000__x0000__x0000__x0000__x0000__x0000__x0000__x0000__x0000__x0000__x0000_	_x0000__x0000__x0000__x0000__x0000__x0000__x0000__x0000__x0000__x0000__x0000__x0000__x0000__x0000__x0000__x0000__x0000__x0000__x0000__x0000__x0000__x0000__x0000__x0000__x0000__x0000__x0000__x0000__x0000__x0000__x0000__x0000__x0000__x0000__x0000__x0000__x0000__x0000__x0000__x0000__x0000__x0000__x0000__x0000__x0000__x0000__x0000__x0000__x0000__x0000__x0000__x0000__x0000__x0000__x0000__x0000__x0000_…	Yang Khli	Point	16.2247	100.371	google map	FECT			40		15
180	Thailand	Potential health hazards of the water resources development: a health survey in the Phitsanulok Irrigation Project, Nan River Basin, Northern Thailand	Bunnag T, Sornmani S, Impand P, Harinasuta C	The Southeast Asian Journal of Tropical Medicine and Public Health	1980	11	4	559	565	community	Cross-sectional study			1977	1978	Phitsanulok/Phichit	_x0000__x0000__x0000__x0000__x0000__x0000__x0000__x0000__x0000__x0000__x0000__x0000__x0000__x0000__x0000__x0000__x0000__x0000__x0000__x0000__x0000__x0000__x0000__x0000__x0000__x0000__x0000__x0000__x0000__x0000__x0000__x0000__x0000__x0000__x0000__x0000__x0000__x0000__x0000__x0000__x0000__x0000__x0000__x0000__x0000__x0000__x0000__x0000__x0000__x0000__x0000__x0000__x0000__x0000__x0000__x0000__x0000_	_x0000__x0000__x0000__x0000__x0000__x0000__x0000__x0000__x0000__x0000__x0000__x0000__x0000__x0000__x0000__x0000__x0000__x0000__x0000__x0000__x0000__x0000__x0000__x0000__x0000__x0000__x0000__x0000__x0000__x0000__x0000__x0000__x0000__x0000__x0000__x0000__x0000__x0000__x0000__x0000__x0000__x0000__x0000__x0000__x0000__x0000__x0000__x0000__x0000__x0000__x0000__x0000__x0000__x0000__x0000__x0000__x0000_…	Sapan Hin	Point	16.2318	100.413	google map	FECT			72		3
181	Thailand	Potential health hazards of the water resources development: a health survey in the Phitsanulok Irrigation Project, Nan River Basin, Northern Thailand	Bunnag T, Sornmani S, Impand P, Harinasuta C	The Southeast Asian Journal of Tropical Medicine and Public Health	1980	11	4	559	565	community	Cross-sectional study			1977	1978	Phitsanulok/Phichit	_x0000__x0000__x0000__x0000__x0000__x0000__x0000__x0000__x0000__x0000__x0000__x0000__x0000__x0000__x0000__x0000__x0000__x0000__x0000__x0000__x0000__x0000__x0000__x0000__x0000__x0000__x0000__x0000__x0000__x0000__x0000__x0000__x0000__x0000__x0000__x0000__x0000__x0000__x0000__x0000__x0000__x0000__x0000__x0000__x0000__x0000__x0000__x0000__x0000__x0000__x0000__x0000__x0000__x0000__x0000__x0000__x0000_	_x0000__x0000__x0000__x0000__x0000__x0000__x0000__x0000__x0000__x0000__x0000__x0000__x0000__x0000__x0000__x0000__x0000__x0000__x0000__x0000__x0000__x0000__x0000__x0000__x0000__x0000__x0000__x0000__x0000__x0000__x0000__x0000__x0000__x0000__x0000__x0000__x0000__x0000__x0000__x0000__x0000__x0000__x0000__x0000__x0000__x0000__x0000__x0000__x0000__x0000__x0000__x0000__x0000__x0000__x0000__x0000__x0000_…	Nuen Saat	Point	16.2416	100.286	google map	FECT			57		16
182	Thailand	Potential health hazards of the water resources development: a health survey in the Phitsanulok Irrigation Project, Nan River Basin, Northern Thailand	Bunnag T, Sornmani S, Impand P, Harinasuta C	The Southeast Asian Journal of Tropical Medicine and Public Health	1980	11	4	559	565	community	Cross-sectional study			1977	1978	Phitsanulok/Phichit	_x0000__x0000__x0000__x0000__x0000__x0000__x0000__x0000__x0000__x0000__x0000__x0000__x0000__x0000__x0000__x0000__x0000__x0000__x0000__x0000__x0000__x0000__x0000__x0000__x0000__x0000__x0000__x0000__x0000__x0000__x0000__x0000__x0000__x0000__x0000__x0000__x0000__x0000__x0000__x0000__x0000__x0000__x0000__x0000__x0000__x0000__x0000__x0000__x0000__x0000__x0000__x0000__x0000__x0000__x0000__x0000__x0000_	_x0000__x0000__x0000__x0000__x0000__x0000__x0000__x0000__x0000__x0000__x0000__x0000__x0000__x0000__x0000__x0000__x0000__x0000__x0000__x0000__x0000__x0000__x0000__x0000__x0000__x0000__x0000__x0000__x0000__x0000__x0000__x0000__x0000__x0000__x0000__x0000__x0000__x0000__x0000__x0000__x0000__x0000__x0000__x0000__x0000__x0000__x0000__x0000__x0000__x0000__x0000__x0000__x0000__x0000__x0000__x0000__x0000_…	Wang Ai Nui	Point	16.2431	100.304	google map	FECT			33		67
183	Thailand	Potential health hazards of the water resources development: a health survey in the Phitsanulok Irrigation Project, Nan River Basin, Northern Thailand	Bunnag T, Sornmani S, Impand P, Harinasuta C	The Southeast Asian Journal of Tropical Medicine and Public Health	1980	11	4	559	565	community	Cross-sectional study			1977	1978	Phitsanulok/Phichit	_x0000__x0000__x0000__x0000__x0000__x0000__x0000__x0000__x0000__x0000__x0000__x0000__x0000__x0000__x0000__x0000__x0000__x0000__x0000__x0000__x0000__x0000__x0000__x0000__x0000__x0000__x0000__x0000__x0000__x0000__x0000__x0000__x0000__x0000__x0000__x0000__x0000__x0000__x0000__x0000__x0000__x0000__x0000__x0000__x0000__x0000__x0000__x0000__x0000__x0000__x0000__x0000__x0000__x0000__x0000__x0000__x0000_	_x0000__x0000__x0000__x0000__x0000__x0000__x0000__x0000__x0000__x0000__x0000__x0000__x0000__x0000__x0000__x0000__x0000__x0000__x0000__x0000__x0000__x0000__x0000__x0000__x0000__x0000__x0000__x0000__x0000__x0000__x0000__x0000__x0000__x0000__x0000__x0000__x0000__x0000__x0000__x0000__x0000__x0000__x0000__x0000__x0000__x0000__x0000__x0000__x0000__x0000__x0000__x0000__x0000__x0000__x0000__x0000__x0000_…	Ban Don	Point	16.2895	100.293	google map	FECT			48		0
184	Thailand	Potential health hazards of the water resources development: a health survey in the Phitsanulok Irrigation Project, Nan River Basin, Northern Thailand	Bunnag T, Sornmani S, Impand P, Harinasuta C	The Southeast Asian Journal of Tropical Medicine and Public Health	1980	11	4	559	565	community	Cross-sectional study			1977	1978	Phitsanulok/Phichit	_x0000__x0000__x0000__x0000__x0000__x0000__x0000__x0000__x0000__x0000__x0000__x0000__x0000__x0000__x0000__x0000__x0000__x0000__x0000__x0000__x0000__x0000__x0000__x0000__x0000__x0000__x0000__x0000__x0000__x0000__x0000__x0000__x0000__x0000__x0000__x0000__x0000__x0000__x0000__x0000__x0000__x0000__x0000__x0000__x0000__x0000__x0000__x0000__x0000__x0000__x0000__x0000__x0000__x0000__x0000__x0000__x0000_	_x0000__x0000__x0000__x0000__x0000__x0000__x0000__x0000__x0000__x0000__x0000__x0000__x0000__x0000__x0000__x0000__x0000__x0000__x0000__x0000__x0000__x0000__x0000__x0000__x0000__x0000__x0000__x0000__x0000__x0000__x0000__x0000__x0000__x0000__x0000__x0000__x0000__x0000__x0000__x0000__x0000__x0000__x0000__x0000__x0000__x0000__x0000__x0000__x0000__x0000__x0000__x0000__x0000__x0000__x0000__x0000__x0000_…	Rong Chang	Point	16.4187	100.263	google map	FECT			47		13
185	Thailand	Potential health hazards of the water resources development: a health survey in the Phitsanulok Irrigation Project, Nan River Basin, Northern Thailand	Bunnag T, Sornmani S, Impand P, Harinasuta C	The Southeast Asian Journal of Tropical Medicine and Public Health	1980	11	4	559	565	community	Cross-sectional study			1977	1978	Phitsanulok/Phichit	_x0000__x0000__x0000__x0000__x0000__x0000__x0000__x0000__x0000__x0000__x0000__x0000__x0000__x0000__x0000__x0000__x0000__x0000__x0000__x0000__x0000__x0000__x0000__x0000__x0000__x0000__x0000__x0000__x0000__x0000__x0000__x0000__x0000__x0000__x0000__x0000__x0000__x0000__x0000__x0000__x0000__x0000__x0000__x0000__x0000__x0000__x0000__x0000__x0000__x0000__x0000__x0000__x0000__x0000__x0000__x0000__x0000_	_x0000__x0000__x0000__x0000__x0000__x0000__x0000__x0000__x0000__x0000__x0000__x0000__x0000__x0000__x0000__x0000__x0000__x0000__x0000__x0000__x0000__x0000__x0000__x0000__x0000__x0000__x0000__x0000__x0000__x0000__x0000__x0000__x0000__x0000__x0000__x0000__x0000__x0000__x0000__x0000__x0000__x0000__x0000__x0000__x0000__x0000__x0000__x0000__x0000__x0000__x0000__x0000__x0000__x0000__x0000__x0000__x0000_…	Bung Si Fai	Point	16.4211	100.326	google map	FECT			32		19
186	Thailand	Potential health hazards of the water resources development: a health survey in the Phitsanulok Irrigation Project, Nan River Basin, Northern Thailand	Bunnag T, Sornmani S, Impand P, Harinasuta C	The Southeast Asian Journal of Tropical Medicine and Public Health	1980	11	4	559	565	community	Cross-sectional study	_x0000__x0000__x0000__x0000__x0000__x0000__x0000__x0000__x0000__x0000_	_x0000__x0000__x0000__x0000__x0000__x0000__x0000__x0000__x0000__x0000__x0000_	1977	1978	Phitsanulok/Phichit	_x0000__x0000__x0000__x0000__x0000__x0000__x0000__x0000__x0000__x0000__x0000__x0000__x0000__x0000__x0000__x0000__x0000__x0000__x0000__x0000__x0000__x0000__x0000__x0000__x0000__x0000__x0000__x0000__x0000__x0000__x0000__x0000__x0000__x0000__x0000__x0000__x0000__x0000__x0000__x0000__x0000__x0000__x0000__x0000__x0000__x0000__x0000__x0000__x0000__x0000__x0000__x0000__x0000__x0000__x0000__x0000__x0000_	_x0000__x0000__x0000__x0000__x0000__x0000__x0000__x0000__x0000__x0000__x0000__x0000__x0000__x0000__x0000__x0000__x0000__x0000__x0000__x0000__x0000__x0000__x0000__x0000__x0000__x0000__x0000__x0000__x0000__x0000__x0000__x0000__x0000__x0000__x0000__x0000__x0000__x0000__x0000__x0000__x0000__x0000__x0000__x0000__x0000__x0000__x0000__x0000__x0000__x0000__x0000__x0000__x0000__x0000__x0000__x0000__x0000_…	Klong Kalon	Point	16.4458	100.349	google map	FECT			30		23
187	Thailand	Potential health hazards of the water resources development: a health survey in the Phitsanulok Irrigation Project, Nan River Basin, Northern Thailand	Bunnag T, Sornmani S, Impand P, Harinasuta C	The Southeast Asian Journal of Tropical Medicine and Public Health	1980	11	4	559	565	community	Cross-sectional study	_x0000__x0000__x0000__x0000__x0000__x0000__x0000__x0000__x0000__x0000_	_x0000__x0000__x0000__x0000__x0000__x0000__x0000__x0000__x0000__x0000__x0000_	1977	1978	Phitsanulok/Phichit	_x0000__x0000__x0000__x0000__x0000__x0000__x0000__x0000__x0000__x0000__x0000__x0000__x0000__x0000__x0000__x0000__x0000__x0000__x0000__x0000__x0000__x0000__x0000__x0000__x0000__x0000__x0000__x0000__x0000__x0000__x0000__x0000__x0000__x0000__x0000__x0000__x0000__x0000__x0000__x0000__x0000__x0000__x0000__x0000__x0000__x0000__x0000__x0000__x0000__x0000__x0000__x0000__x0000__x0000__x0000__x0000__x0000_	_x0000__x0000__x0000__x0000__x0000__x0000__x0000__x0000__x0000__x0000__x0000__x0000__x0000__x0000__x0000__x0000__x0000__x0000__x0000__x0000__x0000__x0000__x0000__x0000__x0000__x0000__x0000__x0000__x0000__x0000__x0000__x0000__x0000__x0000__x0000__x0000__x0000__x0000__x0000__x0000__x0000__x0000__x0000__x0000__x0000__x0000__x0000__x0000__x0000__x0000__x0000__x0000__x0000__x0000__x0000__x0000__x0000_…	Thung Samran	Point	16.4892	100.449	google map	FECT			40		12
188	Thailand	Potential health hazards of the water resources development: a health survey in the Phitsanulok Irrigation Project, Nan River Basin, Northern Thailand	Bunnag T, Sornmani S, Impand P, Harinasuta C	The Southeast Asian Journal of Tropical Medicine and Public Health	1980	11	4	559	565	community	Cross-sectional study	_x0000__x0000__x0000__x0000__x0000__x0000__x0000__x0000__x0000__x0000_	_x0000__x0000__x0000__x0000__x0000__x0000__x0000__x0000__x0000__x0000__x0000_	1977	1978	Phitsanulok/Phichit	_x0000__x0000__x0000__x0000__x0000__x0000__x0000__x0000__x0000__x0000__x0000__x0000__x0000__x0000__x0000__x0000__x0000__x0000__x0000__x0000__x0000__x0000__x0000__x0000__x0000__x0000__x0000__x0000__x0000__x0000__x0000__x0000__x0000__x0000__x0000__x0000__x0000__x0000__x0000__x0000__x0000__x0000__x0000__x0000__x0000__x0000__x0000__x0000__x0000__x0000__x0000__x0000__x0000__x0000__x0000__x0000__x0000_	_x0000__x0000__x0000__x0000__x0000__x0000__x0000__x0000__x0000__x0000__x0000__x0000__x0000__x0000__x0000__x0000__x0000__x0000__x0000__x0000__x0000__x0000__x0000__x0000__x0000__x0000__x0000__x0000__x0000__x0000__x0000__x0000__x0000__x0000__x0000__x0000__x0000__x0000__x0000__x0000__x0000__x0000__x0000__x0000__x0000__x0000__x0000__x0000__x0000__x0000__x0000__x0000__x0000__x0000__x0000__x0000__x0000_…	Pa Makhap	Point	16.4908	100.364	google map	FECT			40		52
189	Thailand	Potential health hazards of the water resources development: a health survey in the Phitsanulok Irrigation Project, Nan River Basin, Northern Thailand	Bunnag T, Sornmani S, Impand P, Harinasuta C	The Southeast Asian Journal of Tropical Medicine and Public Health	1980	11	4	559	565	community	Cross-sectional study	_x0000__x0000__x0000__x0000__x0000__x0000__x0000__x0000__x0000__x0000_	_x0000__x0000__x0000__x0000__x0000__x0000__x0000__x0000__x0000__x0000__x0000_	1977	1978	Phitsanulok/Phichit	_x0000__x0000__x0000__x0000__x0000__x0000__x0000__x0000__x0000__x0000__x0000__x0000__x0000__x0000__x0000__x0000__x0000__x0000__x0000__x0000__x0000__x0000__x0000__x0000__x0000__x0000__x0000__x0000__x0000__x0000__x0000__x0000__x0000__x0000__x0000__x0000__x0000__x0000__x0000__x0000__x0000__x0000__x0000__x0000__x0000__x0000__x0000__x0000__x0000__x0000__x0000__x0000__x0000__x0000__x0000__x0000__x0000_	_x0000__x0000__x0000__x0000__x0000__x0000__x0000__x0000__x0000__x0000__x0000__x0000__x0000__x0000__x0000__x0000__x0000__x0000__x0000__x0000__x0000__x0000__x0000__x0000__x0000__x0000__x0000__x0000__x0000__x0000__x0000__x0000__x0000__x0000__x0000__x0000__x0000__x0000__x0000__x0000__x0000__x0000__x0000__x0000__x0000__x0000__x0000__x0000__x0000__x0000__x0000__x0000__x0000__x0000__x0000__x0000__x0000_…	Lai Chado	Point	16.5122	100.213	google map	FECT			38		71
190	Thailand	Potential health hazards of the water resources development: a health survey in the Phitsanulok Irrigation Project, Nan River Basin, Northern Thailand	Bunnag T, Sornmani S, Impand P, Harinasuta C	The Southeast Asian Journal of Tropical Medicine and Public Health	1980	11	4	559	565	community	Cross-sectional study	_x0000__x0000__x0000__x0000__x0000__x0000__x0000__x0000__x0000__x0000_	_x0000__x0000__x0000__x0000__x0000__x0000__x0000__x0000__x0000__x0000__x0000_	1977	1978	Phitsanulok/Phichit	_x0000__x0000__x0000__x0000__x0000__x0000__x0000__x0000__x0000__x0000__x0000__x0000__x0000__x0000__x0000__x0000__x0000__x0000__x0000__x0000__x0000__x0000__x0000__x0000__x0000__x0000__x0000__x0000__x0000__x0000__x0000__x0000__x0000__x0000__x0000__x0000__x0000__x0000__x0000__x0000__x0000__x0000__x0000__x0000__x0000__x0000__x0000__x0000__x0000__x0000__x0000__x0000__x0000__x0000__x0000__x0000__x0000_	_x0000__x0000__x0000__x0000__x0000__x0000__x0000__x0000__x0000__x0000__x0000__x0000__x0000__x0000__x0000__x0000__x0000__x0000__x0000__x0000__x0000__x0000__x0000__x0000__x0000__x0000__x0000__x0000__x0000__x0000__x0000__x0000__x0000__x0000__x0000__x0000__x0000__x0000__x0000__x0000__x0000__x0000__x0000__x0000__x0000__x0000__x0000__x0000__x0000__x0000__x0000__x0000__x0000__x0000__x0000__x0000__x0000_…	Tha Toei	Point	16.5213	100.563	google map	FECT			40		10
191	Thailand	Potential health hazards of the water resources development: a health survey in the Phitsanulok Irrigation Project, Nan River Basin, Northern Thailand	Bunnag T, Sornmani S, Impand P, Harinasuta C	The Southeast Asian Journal of Tropical Medicine and Public Health	1980	11	4	559	565	community	Cross-sectional study	_x0000__x0000__x0000__x0000__x0000__x0000__x0000__x0000__x0000__x0000_	_x0000__x0000__x0000__x0000__x0000__x0000__x0000__x0000__x0000__x0000__x0000_	1977	1978	Phitsanulok/Phichit	_x0000__x0000__x0000__x0000__x0000__x0000__x0000__x0000__x0000__x0000__x0000__x0000__x0000__x0000__x0000__x0000__x0000__x0000__x0000__x0000__x0000__x0000__x0000__x0000__x0000__x0000__x0000__x0000__x0000__x0000__x0000__x0000__x0000__x0000__x0000__x0000__x0000__x0000__x0000__x0000__x0000__x0000__x0000__x0000__x0000__x0000__x0000__x0000__x0000__x0000__x0000__x0000__x0000__x0000__x0000__x0000__x0000_	_x0000__x0000__x0000__x0000__x0000__x0000__x0000__x0000__x0000__x0000__x0000__x0000__x0000__x0000__x0000__x0000__x0000__x0000__x0000__x0000__x0000__x0000__x0000__x0000__x0000__x0000__x0000__x0000__x0000__x0000__x0000__x0000__x0000__x0000__x0000__x0000__x0000__x0000__x0000__x0000__x0000__x0000__x0000__x0000__x0000__x0000__x0000__x0000__x0000__x0000__x0000__x0000__x0000__x0000__x0000__x0000__x0000_…	Sanam Kli	Point	16.5301	100.237	google map	FECT			34		3
192	Thailand	Potential health hazards of the water resources development: a health survey in the Phitsanulok Irrigation Project, Nan River Basin, Northern Thailand	Bunnag T, Sornmani S, Impand P, Harinasuta C	The Southeast Asian Journal of Tropical Medicine and Public Health	1980	11	4	559	565	community	Cross-sectional study	_x0000__x0000__x0000__x0000__x0000__x0000__x0000__x0000__x0000__x0000_	_x0000__x0000__x0000__x0000__x0000__x0000__x0000__x0000__x0000__x0000__x0000_	1977	1978	Phitsanulok/Phichit	_x0000__x0000__x0000__x0000__x0000__x0000__x0000__x0000__x0000__x0000__x0000__x0000__x0000__x0000__x0000__x0000__x0000__x0000__x0000__x0000__x0000__x0000__x0000__x0000__x0000__x0000__x0000__x0000__x0000__x0000__x0000__x0000__x0000__x0000__x0000__x0000__x0000__x0000__x0000__x0000__x0000__x0000__x0000__x0000__x0000__x0000__x0000__x0000__x0000__x0000__x0000__x0000__x0000__x0000__x0000__x0000__x0000_	_x0000__x0000__x0000__x0000__x0000__x0000__x0000__x0000__x0000__x0000__x0000__x0000__x0000__x0000__x0000__x0000__x0000__x0000__x0000__x0000__x0000__x0000__x0000__x0000__x0000__x0000__x0000__x0000__x0000__x0000__x0000__x0000__x0000__x0000__x0000__x0000__x0000__x0000__x0000__x0000__x0000__x0000__x0000__x0000__x0000__x0000__x0000__x0000__x0000__x0000__x0000__x0000__x0000__x0000__x0000__x0000__x0000_…	Kamphang Din	Point	16.5874	100.162	google map	FECT			26		8
193	Thailand	Potential health hazards of the water resources development: a health survey in the Phitsanulok Irrigation Project, Nan River Basin, Northern Thailand	Bunnag T, Sornmani S, Impand P, Harinasuta C	The Southeast Asian Journal of Tropical Medicine and Public Health	1980	11	4	559	565	community	Cross-sectional study	_x0000__x0000__x0000__x0000__x0000__x0000__x0000__x0000__x0000__x0000_	_x0000__x0000__x0000__x0000__x0000__x0000__x0000__x0000__x0000__x0000__x0000_	1977	1978	Phitsanulok/Phichit	_x0000__x0000__x0000__x0000__x0000__x0000__x0000__x0000__x0000__x0000__x0000__x0000__x0000__x0000__x0000__x0000__x0000__x0000__x0000__x0000__x0000__x0000__x0000__x0000__x0000__x0000__x0000__x0000__x0000__x0000__x0000__x0000__x0000__x0000__x0000__x0000__x0000__x0000__x0000__x0000__x0000__x0000__x0000__x0000__x0000__x0000__x0000__x0000__x0000__x0000__x0000__x0000__x0000__x0000__x0000__x0000__x0000_	_x0000__x0000__x0000__x0000__x0000__x0000__x0000__x0000__x0000__x0000__x0000__x0000__x0000__x0000__x0000__x0000__x0000__x0000__x0000__x0000__x0000__x0000__x0000__x0000__x0000__x0000__x0000__x0000__x0000__x0000__x0000__x0000__x0000__x0000__x0000__x0000__x0000__x0000__x0000__x0000__x0000__x0000__x0000__x0000__x0000__x0000__x0000__x0000__x0000__x0000__x0000__x0000__x0000__x0000__x0000__x0000__x0000_…	Wat Prick	Point	16.6615	100.246	google map	FECT			40		5
194	Thailand	Potential health hazards of the water resources development: a health survey in the Phitsanulok Irrigation Project, Nan River Basin, Northern Thailand	Bunnag T, Sornmani S, Impand P, Harinasuta C	The Southeast Asian Journal of Tropical Medicine and Public Health	1980	11	4	559	565	community	Cross-sectional study	_x0000__x0000__x0000__x0000__x0000__x0000__x0000__x0000__x0000__x0000_	_x0000__x0000__x0000__x0000__x0000__x0000__x0000__x0000__x0000__x0000__x0000_	1977	1978	Phitsanulok/Phichit	_x0000__x0000__x0000__x0000__x0000__x0000__x0000__x0000__x0000__x0000__x0000__x0000__x0000__x0000__x0000__x0000__x0000__x0000__x0000__x0000__x0000__x0000__x0000__x0000__x0000__x0000__x0000__x0000__x0000__x0000__x0000__x0000__x0000__x0000__x0000__x0000__x0000__x0000__x0000__x0000__x0000__x0000__x0000__x0000__x0000__x0000__x0000__x0000__x0000__x0000__x0000__x0000__x0000__x0000__x0000__x0000__x0000_	_x0000__x0000__x0000__x0000__x0000__x0000__x0000__x0000__x0000__x0000__x0000__x0000__x0000__x0000__x0000__x0000__x0000__x0000__x0000__x0000__x0000__x0000__x0000__x0000__x0000__x0000__x0000__x0000__x0000__x0000__x0000__x0000__x0000__x0000__x0000__x0000__x0000__x0000__x0000__x0000__x0000__x0000__x0000__x0000__x0000__x0000__x0000__x0000__x0000__x0000__x0000__x0000__x0000__x0000__x0000__x0000__x0000_…	Wang Pet	Point	16.6639	100.236	google map	FECT			27		18
195	Thailand	Potential health hazards of the water resources development: a health survey in the Phitsanulok Irrigation Project, Nan River Basin, Northern Thailand	Bunnag T, Sornmani S, Impand P, Harinasuta C	The Southeast Asian Journal of Tropical Medicine and Public Health	1980	11	4	559	565	community	Cross-sectional study	_x0000__x0000__x0000__x0000__x0000__x0000__x0000__x0000__x0000__x0000_	_x0000__x0000__x0000__x0000__x0000__x0000__x0000__x0000__x0000__x0000__x0000_	1977	1978	Phitsanulok/Phichit	_x0000__x0000__x0000__x0000__x0000__x0000__x0000__x0000__x0000__x0000__x0000__x0000__x0000__x0000__x0000__x0000__x0000__x0000__x0000__x0000__x0000__x0000__x0000__x0000__x0000__x0000__x0000__x0000__x0000__x0000__x0000__x0000__x0000__x0000__x0000__x0000__x0000__x0000__x0000__x0000__x0000__x0000__x0000__x0000__x0000__x0000__x0000__x0000__x0000__x0000__x0000__x0000__x0000__x0000__x0000__x0000__x0000_	_x0000__x0000__x0000__x0000__x0000__x0000__x0000__x0000__x0000__x0000__x0000__x0000__x0000__x0000__x0000__x0000__x0000__x0000__x0000__x0000__x0000__x0000__x0000__x0000__x0000__x0000__x0000__x0000__x0000__x0000__x0000__x0000__x0000__x0000__x0000__x0000__x0000__x0000__x0000__x0000__x0000__x0000__x0000__x0000__x0000__x0000__x0000__x0000__x0000__x0000__x0000__x0000__x0000__x0000__x0000__x0000__x0000_…	Tha Na	Point	16.8034	100.209	google map	FECT			40		0
196	Thailand	Potential health hazards of the water resources development: a health survey in the Phitsanulok Irrigation Project, Nan River Basin, Northern Thailand	Bunnag T, Sornmani S, Impand P, Harinasuta C	The Southeast Asian Journal of Tropical Medicine and Public Health	1980	11	4	559	565	community	Cross-sectional study	_x0000__x0000__x0000__x0000__x0000__x0000__x0000__x0000__x0000__x0000_	_x0000__x0000__x0000__x0000__x0000__x0000__x0000__x0000__x0000__x0000__x0000_	1977	1978	Phitsanulok/Phichit	_x0000__x0000__x0000__x0000__x0000__x0000__x0000__x0000__x0000__x0000__x0000__x0000__x0000__x0000__x0000__x0000__x0000__x0000__x0000__x0000__x0000__x0000__x0000__x0000__x0000__x0000__x0000__x0000__x0000__x0000__x0000__x0000__x0000__x0000__x0000__x0000__x0000__x0000__x0000__x0000__x0000__x0000__x0000__x0000__x0000__x0000__x0000__x0000__x0000__x0000__x0000__x0000__x0000__x0000__x0000__x0000__x0000_	_x0000__x0000__x0000__x0000__x0000__x0000__x0000__x0000__x0000__x0000__x0000__x0000__x0000__x0000__x0000__x0000__x0000__x0000__x0000__x0000__x0000__x0000__x0000__x0000__x0000__x0000__x0000__x0000__x0000__x0000__x0000__x0000__x0000__x0000__x0000__x0000__x0000__x0000__x0000__x0000__x0000__x0000__x0000__x0000__x0000__x0000__x0000__x0000__x0000__x0000__x0000__x0000__x0000__x0000__x0000__x0000__x0000_…	Tha Nang	Point	16.8116	100.074	google map	FECT			53		21
197	Thailand	Potential health hazards of the water resources development: a health survey in the Phitsanulok Irrigation Project, Nan River Basin, Northern Thailand	Bunnag T, Sornmani S, Impand P, Harinasuta C	The Southeast Asian Journal of Tropical Medicine and Public Health	1980	11	4	559	565	community	Cross-sectional study	_x0000__x0000__x0000__x0000__x0000__x0000__x0000__x0000__x0000__x0000_	_x0000__x0000__x0000__x0000__x0000__x0000__x0000__x0000__x0000__x0000__x0000_	1977	1978	Phitsanulok/Phichit	_x0000__x0000__x0000__x0000__x0000__x0000__x0000__x0000__x0000__x0000__x0000__x0000__x0000__x0000__x0000__x0000__x0000__x0000__x0000__x0000__x0000__x0000__x0000__x0000__x0000__x0000__x0000__x0000__x0000__x0000__x0000__x0000__x0000__x0000__x0000__x0000__x0000__x0000__x0000__x0000__x0000__x0000__x0000__x0000__x0000__x0000__x0000__x0000__x0000__x0000__x0000__x0000__x0000__x0000__x0000__x0000__x0000_	_x0000__x0000__x0000__x0000__x0000__x0000__x0000__x0000__x0000__x0000__x0000__x0000__x0000__x0000__x0000__x0000__x0000__x0000__x0000__x0000__x0000__x0000__x0000__x0000__x0000__x0000__x0000__x0000__x0000__x0000__x0000__x0000__x0000__x0000__x0000__x0000__x0000__x0000__x0000__x0000__x0000__x0000__x0000__x0000__x0000__x0000__x0000__x0000__x0000__x0000__x0000__x0000__x0000__x0000__x0000__x0000__x0000_…	Hat Sung	Point	16.8189	100.237	google map	FECT			29		3
198	Thailand	Potential health hazards of the water resources development: a health survey in the Phitsanulok Irrigation Project, Nan River Basin, Northern Thailand	Bunnag T, Sornmani S, Impand P, Harinasuta C	The Southeast Asian Journal of Tropical Medicine and Public Health	1980	11	4	559	565	community	Cross-sectional study	_x0000__x0000__x0000__x0000__x0000__x0000__x0000__x0000__x0000__x0000_	_x0000__x0000__x0000__x0000__x0000__x0000__x0000__x0000__x0000__x0000__x0000_	1977	1978	Phitsanulok/Phichit	_x0000__x0000__x0000__x0000__x0000__x0000__x0000__x0000__x0000__x0000__x0000__x0000__x0000__x0000__x0000__x0000__x0000__x0000__x0000__x0000__x0000__x0000__x0000__x0000__x0000__x0000__x0000__x0000__x0000__x0000__x0000__x0000__x0000__x0000__x0000__x0000__x0000__x0000__x0000__x0000__x0000__x0000__x0000__x0000__x0000__x0000__x0000__x0000__x0000__x0000__x0000__x0000__x0000__x0000__x0000__x0000__x0000_	_x0000__x0000__x0000__x0000__x0000__x0000__x0000__x0000__x0000__x0000__x0000__x0000__x0000__x0000__x0000__x0000__x0000__x0000__x0000__x0000__x0000__x0000__x0000__x0000__x0000__x0000__x0000__x0000__x0000__x0000__x0000__x0000__x0000__x0000__x0000__x0000__x0000__x0000__x0000__x0000__x0000__x0000__x0000__x0000__x0000__x0000__x0000__x0000__x0000__x0000__x0000__x0000__x0000__x0000__x0000__x0000__x0000_…	Chom Thong	Point	16.8991	100.201	google map	FECT			70		4
199	Thailand	Potential health hazards of the water resources development: a health survey in the Phitsanulok Irrigation Project, Nan River Basin, Northern Thailand	Bunnag T, Sornmani S, Impand P, Harinasuta C	The Southeast Asian Journal of Tropical Medicine and Public Health	1980	11	4	559	565	community	Cross-sectional study	_x0000__x0000__x0000__x0000__x0000__x0000__x0000__x0000__x0000__x0000_	_x0000__x0000__x0000__x0000__x0000__x0000__x0000__x0000__x0000__x0000__x0000_	1977	1978	Phitsanulok/Phichit	_x0000__x0000__x0000__x0000__x0000__x0000__x0000__x0000__x0000__x0000__x0000__x0000__x0000__x0000__x0000__x0000__x0000__x0000__x0000__x0000__x0000__x0000__x0000__x0000__x0000__x0000__x0000__x0000__x0000__x0000__x0000__x0000__x0000__x0000__x0000__x0000__x0000__x0000__x0000__x0000__x0000__x0000__x0000__x0000__x0000__x0000__x0000__x0000__x0000__x0000__x0000__x0000__x0000__x0000__x0000__x0000__x0000_	_x0000__x0000__x0000__x0000__x0000__x0000__x0000__x0000__x0000__x0000__x0000__x0000__x0000__x0000__x0000__x0000__x0000__x0000__x0000__x0000__x0000__x0000__x0000__x0000__x0000__x0000__x0000__x0000__x0000__x0000__x0000__x0000__x0000__x0000__x0000__x0000__x0000__x0000__x0000__x0000__x0000__x0000__x0000__x0000__x0000__x0000__x0000__x0000__x0000__x0000__x0000__x0000__x0000__x0000__x0000__x0000__x0000_…	Tha Chang	Point	16.9581	100.134	google map	FECT			16		25
200	Thailand	Potential health hazards of the water resources development: a health survey in the Phitsanulok Irrigation Project, Nan River Basin, Northern Thailand	Bunnag T, Sornmani S, Impand P, Harinasuta C	The Southeast Asian Journal of Tropical Medicine and Public Health	1980	11	4	559	565	community	Cross-sectional study	_x0000__x0000__x0000__x0000__x0000__x0000__x0000__x0000__x0000__x0000_	_x0000__x0000__x0000__x0000__x0000__x0000__x0000__x0000__x0000__x0000__x0000_	1977	1978	Phitsanulok/Phichit	_x0000__x0000__x0000__x0000__x0000__x0000__x0000__x0000__x0000__x0000__x0000__x0000__x0000__x0000__x0000__x0000__x0000__x0000__x0000__x0000__x0000__x0000__x0000__x0000__x0000__x0000__x0000__x0000__x0000__x0000__x0000__x0000__x0000__x0000__x0000__x0000__x0000__x0000__x0000__x0000__x0000__x0000__x0000__x0000__x0000__x0000__x0000__x0000__x0000__x0000__x0000__x0000__x0000__x0000__x0000__x0000__x0000_	_x0000__x0000__x0000__x0000__x0000__x0000__x0000__x0000__x0000__x0000__x0000__x0000__x0000__x0000__x0000__x0000__x0000__x0000__x0000__x0000__x0000__x0000__x0000__x0000__x0000__x0000__x0000__x0000__x0000__x0000__x0000__x0000__x0000__x0000__x0000__x0000__x0000__x0000__x0000__x0000__x0000__x0000__x0000__x0000__x0000__x0000__x0000__x0000__x0000__x0000__x0000__x0000__x0000__x0000__x0000__x0000__x0000_…	Tha Makam	Point	17.0338	100.412	google map	FECT			32		3
201	Thailand	Potential health hazards of the water resources development: a health survey in the Phitsanulok Irrigation Project, Nan River Basin, Northern Thailand	Bunnag T, Sornmani S, Impand P, Harinasuta C	The Southeast Asian Journal of Tropical Medicine and Public Health	1980	11	4	559	565	community	Cross-sectional study	_x0000__x0000__x0000__x0000__x0000__x0000__x0000__x0000__x0000__x0000_	_x0000__x0000__x0000__x0000__x0000__x0000__x0000__x0000__x0000__x0000__x0000_	1977	1978	Phitsanulok/Phichit	_x0000__x0000__x0000__x0000__x0000__x0000__x0000__x0000__x0000__x0000__x0000__x0000__x0000__x0000__x0000__x0000__x0000__x0000__x0000__x0000__x0000__x0000__x0000__x0000__x0000__x0000__x0000__x0000__x0000__x0000__x0000__x0000__x0000__x0000__x0000__x0000__x0000__x0000__x0000__x0000__x0000__x0000__x0000__x0000__x0000__x0000__x0000__x0000__x0000__x0000__x0000__x0000__x0000__x0000__x0000__x0000__x0000_	_x0000__x0000__x0000__x0000__x0000__x0000__x0000__x0000__x0000__x0000__x0000__x0000__x0000__x0000__x0000__x0000__x0000__x0000__x0000__x0000__x0000__x0000__x0000__x0000__x0000__x0000__x0000__x0000__x0000__x0000__x0000__x0000__x0000__x0000__x0000__x0000__x0000__x0000__x0000__x0000__x0000__x0000__x0000__x0000__x0000__x0000__x0000__x0000__x0000__x0000__x0000__x0000__x0000__x0000__x0000__x0000__x0000_…	Nuen Kum	Point	17.0975	100.388	google map	FECT			27		55
202	Thailand	Potential health hazards of the water resources development: a health survey in the Phitsanulok Irrigation Project, Nan River Basin, Northern Thailand	Bunnag T, Sornmani S, Impand P, Harinasuta C	The Southeast Asian Journal of Tropical Medicine and Public Health	1980	11	4	559	565	community	Cross-sectional study	_x0000__x0000__x0000__x0000__x0000__x0000__x0000__x0000__x0000__x0000_	_x0000__x0000__x0000__x0000__x0000__x0000__x0000__x0000__x0000__x0000__x0000_	1977	1978	Phitsanulok/Phichit	_x0000__x0000__x0000__x0000__x0000__x0000__x0000__x0000__x0000__x0000__x0000__x0000__x0000__x0000__x0000__x0000__x0000__x0000__x0000__x0000__x0000__x0000__x0000__x0000__x0000__x0000__x0000__x0000__x0000__x0000__x0000__x0000__x0000__x0000__x0000__x0000__x0000__x0000__x0000__x0000__x0000__x0000__x0000__x0000__x0000__x0000__x0000__x0000__x0000__x0000__x0000__x0000__x0000__x0000__x0000__x0000__x0000_	_x0000__x0000__x0000__x0000__x0000__x0000__x0000__x0000__x0000__x0000__x0000__x0000__x0000__x0000__x0000__x0000__x0000__x0000__x0000__x0000__x0000__x0000__x0000__x0000__x0000__x0000__x0000__x0000__x0000__x0000__x0000__x0000__x0000__x0000__x0000__x0000__x0000__x0000__x0000__x0000__x0000__x0000__x0000__x0000__x0000__x0000__x0000__x0000__x0000__x0000__x0000__x0000__x0000__x0000__x0000__x0000__x0000_…	Nam Hak	Point	17.1037	100.391	google map	FECT			32		22
203	Thailand	Potential health hazards of the water resources development: a health survey in the Phitsanulok Irrigation Project, Nan River Basin, Northern Thailand	Bunnag T, Sornmani S, Impand P, Harinasuta C	The Southeast Asian Journal of Tropical Medicine and Public Health	1980	11	4	559	565	community	Cross-sectional study	_x0000__x0000__x0000__x0000__x0000__x0000__x0000__x0000__x0000__x0000_	_x0000__x0000__x0000__x0000__x0000__x0000__x0000__x0000__x0000__x0000__x0000_	1977	1978	Phitsanulok/Phichit	_x0000__x0000__x0000__x0000__x0000__x0000__x0000__x0000__x0000__x0000__x0000__x0000__x0000__x0000__x0000__x0000__x0000__x0000__x0000__x0000__x0000__x0000__x0000__x0000__x0000__x0000__x0000__x0000__x0000__x0000__x0000__x0000__x0000__x0000__x0000__x0000__x0000__x0000__x0000__x0000__x0000__x0000__x0000__x0000__x0000__x0000__x0000__x0000__x0000__x0000__x0000__x0000__x0000__x0000__x0000__x0000__x0000_	_x0000__x0000__x0000__x0000__x0000__x0000__x0000__x0000__x0000__x0000__x0000__x0000__x0000__x0000__x0000__x0000__x0000__x0000__x0000__x0000__x0000__x0000__x0000__x0000__x0000__x0000__x0000__x0000__x0000__x0000__x0000__x0000__x0000__x0000__x0000__x0000__x0000__x0000__x0000__x0000__x0000__x0000__x0000__x0000__x0000__x0000__x0000__x0000__x0000__x0000__x0000__x0000__x0000__x0000__x0000__x0000__x0000_…	Hua Thae	Point	17.1403	100.726	google map	FECT			63		2
204	Thailand	Potential health hazards of the water resources development: a health survey in the Phitsanulok Irrigation Project, Nan River Basin, Northern Thailand	Bunnag T, Sornmani S, Impand P, Harinasuta C	The Southeast Asian Journal of Tropical Medicine and Public Health	1980	11	4	559	565	community	Cross-sectional study	_x0000__x0000__x0000__x0000__x0000__x0000__x0000__x0000__x0000__x0000_	_x0000__x0000__x0000__x0000__x0000__x0000__x0000__x0000__x0000__x0000__x0000_	1977	1978	Phitsanulok/Phichit	_x0000__x0000__x0000__x0000__x0000__x0000__x0000__x0000__x0000__x0000__x0000__x0000__x0000__x0000__x0000__x0000__x0000__x0000__x0000__x0000__x0000__x0000__x0000__x0000__x0000__x0000__x0000__x0000__x0000__x0000__x0000__x0000__x0000__x0000__x0000__x0000__x0000__x0000__x0000__x0000__x0000__x0000__x0000__x0000__x0000__x0000__x0000__x0000__x0000__x0000__x0000__x0000__x0000__x0000__x0000__x0000__x0000_	_x0000__x0000__x0000__x0000__x0000__x0000__x0000__x0000__x0000__x0000__x0000__x0000__x0000__x0000__x0000__x0000__x0000__x0000__x0000__x0000__x0000__x0000__x0000__x0000__x0000__x0000__x0000__x0000__x0000__x0000__x0000__x0000__x0000__x0000__x0000__x0000__x0000__x0000__x0000__x0000__x0000__x0000__x0000__x0000__x0000__x0000__x0000__x0000__x0000__x0000__x0000__x0000__x0000__x0000__x0000__x0000__x0000_…	Huai Dang	Point	17.3116	100.391	google map	FECT			58		0
205	Thailand	Potential risk of a liver fluke Opisthorchis viverrini infection brought by immigrants from prevalent areas: A case study in the lower Northern Thailand	Pumidonming W, Katahira H, Igarashi M, Salman D, Abdelbaset AE, Sangkaeo K	Acta Tropica	2018	178	_x0000__x0000__x0000__x0000__x0000_	213	218	community	Cross-sectional study	Jan	Oct	2014	2014	Uthai Thani	Taluk Du	Thap Than	Thap Than	Point	15.4525	99.7414	paper	FECT	17	54	11		3.6
206	Thailand	Potential risk of a liver fluke Opisthorchis viverrini infection brought by immigrants from prevalent areas: A case study in the lower Northern Thailand	Pumidonming W, Katahira H, Igarashi M, Salman D, Abdelbaset AE, Sangkaeo K	Acta Tropica	2018	178	_x0000__x0000__x0000__x0000__x0000_	213	218	community	Cross-sectional study	Jan	Oct	2014	2014	Phetchabun	Khok Prong	Wichian Buri	Wichian Buri	Point	15.7644	101.15	paper	FECT	17	54	122		28.7
207	Thailand	Potential risk of a liver fluke Opisthorchis viverrini infection brought by immigrants from prevalent areas: A case study in the lower Northern Thailand	Pumidonming W, Katahira H, Igarashi M, Salman D, Abdelbaset AE, Sangkaeo K	Acta Tropica	2018	178	_x0000__x0000__x0000__x0000__x0000_	213	218	community	Cross-sectional study	Jan	Oct	2014	2014	Nakhon Sawan	Than Thahan	Nong Bua	Nong Bua	Point	15.795	100.541	paper	FECT	17	54	101		6
208	Thailand	Potential risk of a liver fluke Opisthorchis viverrini infection brought by immigrants from prevalent areas: A case study in the lower Northern Thailand	Pumidonming W, Katahira H, Igarashi M, Salman D, Abdelbaset AE, Sangkaeo K	Acta Tropica	2018	178	_x0000__x0000__x0000__x0000__x0000_	213	218	community	Cross-sectional study	Jan	Oct	2014	2014	Kamphaeng Phet	Khlong Lan	Khlong Lan Phatthana	Khlong Lan Phatthana	Point	16.1195	99.3007	paper	FECT	17	54	108		0
209	Thailand	Potential risk of a liver fluke Opisthorchis viverrini infection brought by immigrants from prevalent areas: A case study in the lower Northern Thailand	Pumidonming W, Katahira H, Igarashi M, Salman D, Abdelbaset AE, Sangkaeo K	Acta Tropica	2018	178	_x0000__x0000__x0000__x0000__x0000_	213	218	community	Cross-sectional study	Jan	Oct	2014	2014	Phichit	Wang Sai Phun	Wang Sai Phun	Wang Sai Phun	Point	16.3962	100.586	paper	FECT	17	54	79		3.8
210	Thailand	Potential risk of a liver fluke Opisthorchis viverrini infection brought by immigrants from prevalent areas: A case study in the lower Northern Thailand	Pumidonming W, Katahira H, Igarashi M, Salman D, Abdelbaset AE, Sangkaeo K	Acta Tropica	2018	178	_x0000__x0000__x0000__x0000__x0000_	213	218	community	Cross-sectional study	Jan	Oct	2014	2014	Phitsanulok	Noen Maprang	Sai Yoi	Sai Yoi	Point	16.4404	100.631	paper	FECT	17	54	100		12
211	Thailand	Potential risk of a liver fluke Opisthorchis viverrini infection brought by immigrants from prevalent areas: A case study in the lower Northern Thailand	Pumidonming W, Katahira H, Igarashi M, Salman D, Abdelbaset AE, Sangkaeo K	Acta Tropica	2018	178	_x0000__x0000__x0000__x0000__x0000_	213	218	community	Cross-sectional study	Jan	Oct	2014	2014	Take	Mueang Tak	Wang Prachop	Wang Prachop	Point	16.9189	99.3811	paper	FECT	17	54	95		2.1
212	Thailand	Potential risk of a liver fluke Opisthorchis viverrini infection brought by immigrants from prevalent areas: A case study in the lower Northern Thailand	Pumidonming W, Katahira H, Igarashi M, Salman D, Abdelbaset AE, Sangkaeo K	Acta Tropica	2018	178	_x0000__x0000__x0000__x0000__x0000_	213	218	community	Cross-sectional study	Jan	Oct	2014	2014	Sukkhothai	Ban Dab Lan Hci	Taling Chan	Taling Chan	Point	17.1403	99.4339	paper	FECT	17	54	128		5.5
213	Thailand	Potential risk of a liver fluke Opisthorchis viverrini infection brought by immigrants from prevalent areas: A case study in the lower Northern Thailand	Pumidonming W, Katahira H, Igarashi M, Salman D, Abdelbaset AE, Sangkaeo K	Acta Tropica	2018	178	_x0000__x0000__x0000__x0000__x0000_	213	218	community	Cross-sectional study	Jan	Oct	2014	2014	Uttaradit	Mueang Chet Ton	Ban Khok	Ban Khok	Point	18.1319	101.049	paper	FECT	17	54	126		0
214	Thailand	Prevalence and associated risk factors of Opisthorchis viverrini infections in rural communities along the Nam Kam River of Northeastern Thailand	Chuangchaiya S, Laoprom N, Idris ZM	Tropical Biomedicine	2019	36	1	81	93	community	Cross-sectional study	Mar	Jun	2017	2017	Nakhon Phanom Province	That Phanom District	Fang Daeng sub-district	Ban Fang Daeng	Point	16.9274	104.674	google map	Kato-Katz			250		19.6
215	Thailand	Prevalence and associated risk factors of Opisthorchis viverrini infections in rural communities along the Nam Kam River of Northeastern Thailand	Chuangchaiya S, Laoprom N, Idris ZM	Tropical Biomedicine	2019	36	1	81	93	community	Cross-sectional study	Mar	Jun	2017	2017	Sakon Nakhon Province	Phon Na Kaew District	Na Tong Watthana sub-district	Ban Phon Khae Noi	Point	17.1886	104.312	google map	Kato-Katz			245		11
216	Thailand	Prevalence and risk factors for Opisthorchis viverrini infections in upper Northeast Thailand	Thaewnongiew K, Singthong S, Kutchamart S, Tangsawad S, Promthet S, Sailugkum S, Wongba N	Asian Pacific Journal of Cancer Prevention	2014	15	16	6609	6612	community	Cross-sectional study	Feb	Oct	2013	2013	Nakhonphanom	Tart Phanom	_x0000__x0000__x0000__x0000__x0000__x0000__x0000__x0000__x0000__x0000__x0000__x0000__x0000__x0000__x0000__x0000__x0000__x0000__x0000__x0000__x0000__x0000__x0000__x0000__x0000__x0000__x0000__x0000__x0000__x0000__x0000__x0000__x0000__x0000__x0000__x0000__x0000__x0000__x0000__x0000__x0000__x0000__x0000__x0000__x0000__x0000__x0000__x0000__x0000__x0000__x0000__x0000__x0000__x0000__x0000__x0000__x0000_…	Maijampa	Point	16.8989	104.683	google map	Kato-Katz	15	80	29		68.9
217	Thailand	Prevalence and risk factors for Opisthorchis viverrini infections in upper Northeast Thailand	Thaewnongiew K, Singthong S, Kutchamart S, Tangsawad S, Promthet S, Sailugkum S, Wongba N	Asian Pacific Journal of Cancer Prevention	2014	15	16	6609	6612	community	Cross-sectional study	Feb	Oct	2013	2013	Sakonnakhon	Tao Ngoi	_x0000__x0000__x0000__x0000__x0000__x0000__x0000__x0000__x0000__x0000__x0000__x0000__x0000__x0000__x0000__x0000__x0000__x0000__x0000__x0000__x0000__x0000__x0000__x0000__x0000__x0000__x0000__x0000__x0000__x0000__x0000__x0000__x0000__x0000__x0000__x0000__x0000__x0000__x0000__x0000__x0000__x0000__x0000__x0000__x0000__x0000__x0000__x0000__x0000__x0000__x0000__x0000__x0000__x0000__x0000__x0000__x0000_…	Ankam	Point	16.9419	104.176	google map	Kato-Katz	15	80	25		80
218	Thailand	Prevalence and risk factors for Opisthorchis viverrini infections in upper Northeast Thailand	Thaewnongiew K, Singthong S, Kutchamart S, Tangsawad S, Promthet S, Sailugkum S, Wongba N	Asian Pacific Journal of Cancer Prevention	2014	15	16	6609	6612	community	Cross-sectional study	Feb	Oct	2013	2013	Nakhonphanom	Ponsawan	_x0000__x0000__x0000__x0000__x0000__x0000__x0000__x0000__x0000__x0000__x0000__x0000__x0000__x0000__x0000__x0000__x0000__x0000__x0000__x0000__x0000__x0000__x0000__x0000__x0000__x0000__x0000__x0000__x0000__x0000__x0000__x0000__x0000__x0000__x0000__x0000__x0000__x0000__x0000__x0000__x0000__x0000__x0000__x0000__x0000__x0000__x0000__x0000__x0000__x0000__x0000__x0000__x0000__x0000__x0000__x0000__x0000_…	Huaihai	Point	17.2517	104.362	google map	Kato-Katz	15	80	29		58.6
219	Thailand	Prevalence and risk factors for Opisthorchis viverrini infections in upper Northeast Thailand	Thaewnongiew K, Singthong S, Kutchamart S, Tangsawad S, Promthet S, Sailugkum S, Wongba N	Asian Pacific Journal of Cancer Prevention	2014	15	16	6609	6612	community	Cross-sectional study	Feb	Oct	2013	2013	Nakhonphanom	Muang	_x0000__x0000__x0000__x0000__x0000__x0000__x0000__x0000__x0000__x0000__x0000__x0000__x0000__x0000__x0000__x0000__x0000__x0000__x0000__x0000__x0000__x0000__x0000__x0000__x0000__x0000__x0000__x0000__x0000__x0000__x0000__x0000__x0000__x0000__x0000__x0000__x0000__x0000__x0000__x0000__x0000__x0000__x0000__x0000__x0000__x0000__x0000__x0000__x0000__x0000__x0000__x0000__x0000__x0000__x0000__x0000__x0000_…	Thai sammakee	Point	17.3267	104.592	google map	Kato-Katz	15	80	18		72.2
220	Thailand	Prevalence and risk factors for Opisthorchis viverrini infections in upper Northeast Thailand	Thaewnongiew K, Singthong S, Kutchamart S, Tangsawad S, Promthet S, Sailugkum S, Wongba N	Asian Pacific Journal of Cancer Prevention	2014	15	16	6609	6612	community	Cross-sectional study	Feb	Oct	2013	2013	Nakhonphanom	Ponsawan	_x0000__x0000__x0000__x0000__x0000__x0000__x0000__x0000__x0000__x0000__x0000__x0000__x0000__x0000__x0000__x0000__x0000__x0000__x0000__x0000__x0000__x0000__x0000__x0000__x0000__x0000__x0000__x0000__x0000__x0000__x0000__x0000__x0000__x0000__x0000__x0000__x0000__x0000__x0000__x0000__x0000__x0000__x0000__x0000__x0000__x0000__x0000__x0000__x0000__x0000__x0000__x0000__x0000__x0000__x0000__x0000__x0000_…	Hamhakngaew	Point	17.3685	104.371	google map	Kato-Katz	15	80	23		60.9
221	Thailand	Prevalence and risk factors for Opisthorchis viverrini infections in upper Northeast Thailand	Thaewnongiew K, Singthong S, Kutchamart S, Tangsawad S, Promthet S, Sailugkum S, Wongba N	Asian Pacific Journal of Cancer Prevention	2014	15	16	6609	6612	community	Cross-sectional study	Feb	Oct	2013	2013	Nakhonphanom	Srisongkam	_x0000__x0000__x0000__x0000__x0000__x0000__x0000__x0000__x0000__x0000__x0000__x0000__x0000__x0000__x0000__x0000__x0000__x0000__x0000__x0000__x0000__x0000__x0000__x0000__x0000__x0000__x0000__x0000__x0000__x0000__x0000__x0000__x0000__x0000__x0000__x0000__x0000__x0000__x0000__x0000__x0000__x0000__x0000__x0000__x0000__x0000__x0000__x0000__x0000__x0000__x0000__x0000__x0000__x0000__x0000__x0000__x0000_…	Phu kratae	Point	17.5776	104.392	google map	Kato-Katz	15	80	29		58.6
222	Thailand	Prevalence and risk factors for Opisthorchis viverrini infections in upper Northeast Thailand	Thaewnongiew K, Singthong S, Kutchamart S, Tangsawad S, Promthet S, Sailugkum S, Wongba N	Asian Pacific Journal of Cancer Prevention	2014	15	16	6609	6612	community	Cross-sectional study	Feb	Oct	2013	2013	Nakhonphanom	Ban Phaeng	_x0000__x0000__x0000__x0000__x0000__x0000__x0000__x0000__x0000__x0000__x0000__x0000__x0000__x0000__x0000__x0000__x0000__x0000__x0000__x0000__x0000__x0000__x0000__x0000__x0000__x0000__x0000__x0000__x0000__x0000__x0000__x0000__x0000__x0000__x0000__x0000__x0000__x0000__x0000__x0000__x0000__x0000__x0000__x0000__x0000__x0000__x0000__x0000__x0000__x0000__x0000__x0000__x0000__x0000__x0000__x0000__x0000_…	Donpang	Point	17.8318	104.266	google map	Kato-Katz	15	80	12		75
223	Thailand	Prevalence and risk factors for Opisthorchis viverrini infections in upper Northeast Thailand	Thaewnongiew K, Singthong S, Kutchamart S, Tangsawad S, Promthet S, Sailugkum S, Wongba N	Asian Pacific Journal of Cancer Prevention	2014	15	16	6609	6612	community	Cross-sectional study	Feb	Oct	2013	2013	Nakhonphanom	Ban Phaeng	_x0000__x0000__x0000__x0000__x0000__x0000__x0000__x0000__x0000__x0000__x0000__x0000__x0000__x0000__x0000__x0000__x0000__x0000__x0000__x0000__x0000__x0000__x0000__x0000__x0000__x0000__x0000__x0000__x0000__x0000__x0000__x0000__x0000__x0000__x0000__x0000__x0000__x0000__x0000__x0000__x0000__x0000__x0000__x0000__x0000__x0000__x0000__x0000__x0000__x0000__x0000__x0000__x0000__x0000__x0000__x0000__x0000_…	Kongswang	Point	17.9631	104.043	google map	Kato-Katz	15	80	23		78.3
224	Thailand	Prevalence and risk factors for Opisthorchis viverrini infections in upper Northeast Thailand	Thaewnongiew K, Singthong S, Kutchamart S, Tangsawad S, Promthet S, Sailugkum S, Wongba N	Asian Pacific Journal of Cancer Prevention	2014	15	16	6609	6612	community	Cross-sectional study	Feb	Oct	2013	2013	Nongkhai	Faorai	_x0000__x0000__x0000__x0000__x0000__x0000__x0000__x0000__x0000__x0000__x0000__x0000__x0000__x0000__x0000__x0000__x0000__x0000__x0000__x0000__x0000__x0000__x0000__x0000__x0000__x0000__x0000__x0000__x0000__x0000__x0000__x0000__x0000__x0000__x0000__x0000__x0000__x0000__x0000__x0000__x0000__x0000__x0000__x0000__x0000__x0000__x0000__x0000__x0000__x0000__x0000__x0000__x0000__x0000__x0000__x0000__x0000_…	Nonmunpla	Point	18.0146	103.478	google map	Kato-Katz	15	80	17		58.8
225	Thailand	Prevalence and risk factors for Opisthorchis viverrini infections in upper Northeast Thailand	Thaewnongiew K, Singthong S, Kutchamart S, Tangsawad S, Promthet S, Sailugkum S, Wongba N	Asian Pacific Journal of Cancer Prevention	2014	15	16	6609	6612	community	Cross-sectional study	Feb	Oct	2013	2013	Nongkai	Fao Rai	_x0000__x0000__x0000__x0000__x0000__x0000__x0000__x0000__x0000__x0000__x0000__x0000__x0000__x0000__x0000__x0000__x0000__x0000__x0000__x0000__x0000__x0000__x0000__x0000__x0000__x0000__x0000__x0000__x0000__x0000__x0000__x0000__x0000__x0000__x0000__x0000__x0000__x0000__x0000__x0000__x0000__x0000__x0000__x0000__x0000__x0000__x0000__x0000__x0000__x0000__x0000__x0000__x0000__x0000__x0000__x0000__x0000_…	Nhongbuakam	Point	18.0348	103.212	google map	Kato-Katz	15	80	16		62.5
226	Thailand	Prevalence of Opisthorchis viverrini infection among villagers harboring Opisthorchis-like eggs	Sukontason KL, Sukontason K, Piangjai S, Pungpak S, Radomyos P	The Southeast Asian Journal of Tropical Medicine and Public Health	2001	32	2	23	26	community	Cross-sectional study	_x0000__x0000__x0000__x0000__x0000__x0000__x0000__x0000__x0000__x0000_	_x0000__x0000__x0000__x0000__x0000__x0000__x0000__x0000__x0000__x0000__x0000_			Chiang Mai	Doi Saket	_x0000__x0000__x0000__x0000__x0000__x0000__x0000__x0000__x0000__x0000__x0000__x0000__x0000__x0000__x0000__x0000__x0000__x0000__x0000__x0000__x0000__x0000__x0000__x0000__x0000__x0000__x0000__x0000__x0000__x0000__x0000__x0000__x0000__x0000__x0000__x0000__x0000__x0000__x0000__x0000__x0000__x0000__x0000__x0000__x0000__x0000__x0000__x0000__x0000__x0000__x0000__x0000__x0000__x0000__x0000__x0000__x0000_…	Huay Hug and Mae Luang Nuer	Point	18.93	99.1362	google map	FECT	10		68	47	69.12
227	Thailand	Relationship between prevalence and intensity of Opisthorchis viverrini infection, and clinical symptoms and signs in a rural community in north-east Thailand	Upatham ES, Viyanant V, Kurathong S, Rojborwonwitaya J, Brockelman WY, Ardsungnoen S, Lee P, Vajrasthira S	Bulletin of the World Health Organization	1984	62	3	451	61	community	Cross-sectional study					Khon Kaen	Chonnabot	_x0000__x0000__x0000__x0000__x0000__x0000__x0000__x0000__x0000__x0000__x0000__x0000__x0000__x0000__x0000__x0000__x0000__x0000__x0000__x0000__x0000__x0000__x0000__x0000__x0000__x0000__x0000__x0000__x0000__x0000__x0000__x0000__x0000__x0000__x0000__x0000__x0000__x0000__x0000__x0000__x0000__x0000__x0000__x0000__x0000__x0000__x0000__x0000__x0000__x0000__x0000__x0000__x0000__x0000__x0000__x0000__x0000_…	Chonnabot	Point	16.0921	102.622	google map	Stoll's	0	≥60	1651		89.5			765		89	886		90
228	Thailand	Social network analysis of food sharing among households in opisthorchiasis endemic villages of Lawa Lake, Thailand	Phimpraphai W, Tangkawattana S, Sereerak P, Kasemsuwan S, Sripa B	Acta Tropica	2017	169	_x0000__x0000__x0000__x0000__x0000_	150	156	community	Cross-sectional study					Khon Kean	_x0000__x0000__x0000__x0000__x0000__x0000__x0000__x0000__x0000__x0000__x0000__x0000__x0000__x0000__x0000__x0000__x0000__x0000__x0000__x0000__x0000__x0000__x0000__x0000__x0000__x0000__x0000__x0000__x0000__x0000__x0000__x0000__x0000__x0000__x0000__x0000__x0000__x0000__x0000__x0000__x0000__x0000__x0000__x0000__x0000__x0000__x0000__x0000__x0000__x0000__x0000__x0000__x0000__x0000__x0000__x0000__x0000_	Amphoe Ban Phai	Tambon Hua Nong	Point	16.0992	102.685	google map	Not stated or missing					88.57
229	Thailand	Social network analysis of food sharing among households in opisthorchiasis endemic villages of Lawa Lake, Thailand	Phimpraphai W, Tangkawattana S, Sereerak P, Kasemsuwan S, Sripa B	Acta Tropica	2017	169	_x0000__x0000__x0000__x0000__x0000_	150	156	community	Cross-sectional study					Khon Kean	_x0000__x0000__x0000__x0000__x0000__x0000__x0000__x0000__x0000__x0000__x0000__x0000__x0000__x0000__x0000__x0000__x0000__x0000__x0000__x0000__x0000__x0000__x0000__x0000__x0000__x0000__x0000__x0000__x0000__x0000__x0000__x0000__x0000__x0000__x0000__x0000__x0000__x0000__x0000__x0000__x0000__x0000__x0000__x0000__x0000__x0000__x0000__x0000__x0000__x0000__x0000__x0000__x0000__x0000__x0000__x0000__x0000_	_x0000__x0000__x0000__x0000__x0000__x0000__x0000__x0000__x0000__x0000__x0000__x0000__x0000__x0000__x0000__x0000__x0000__x0000__x0000__x0000__x0000__x0000__x0000__x0000__x0000__x0000__x0000__x0000__x0000__x0000__x0000__x0000__x0000__x0000__x0000__x0000__x0000__x0000__x0000__x0000__x0000__x0000__x0000__x0000__x0000__x0000__x0000__x0000__x0000__x0000__x0000__x0000__x0000__x0000__x0000__x0000__x0000_…	Khok Samran	Point	16.1755	102.696	google map	Not stated or missing					29.17
230	Thailand	The ELISA-based detection of anti-Opisthorchis viverrini IgG and IgG4 in samples of human urine and serum from an endemic area of north-eastern Thailand	Tesana S, Srisawangwong T, Sithithaworn P, Itoh M, Phumchaiyothin R	Annals of tropical medicine and parasitology	2007	101	7	585	591	community	Cross-sectional study					Chaiyaphum province	_x0000__x0000__x0000__x0000__x0000__x0000__x0000__x0000__x0000__x0000__x0000__x0000__x0000__x0000__x0000__x0000__x0000__x0000__x0000__x0000__x0000__x0000__x0000__x0000__x0000__x0000__x0000__x0000__x0000__x0000__x0000__x0000__x0000__x0000__x0000__x0000__x0000__x0000__x0000__x0000__x0000__x0000__x0000__x0000__x0000__x0000__x0000__x0000__x0000__x0000__x0000__x0000__x0000__x0000__x0000__x0000__x0000_	_x0000__x0000__x0000__x0000__x0000__x0000__x0000__x0000__x0000__x0000__x0000__x0000__x0000__x0000__x0000__x0000__x0000__x0000__x0000__x0000__x0000__x0000__x0000__x0000__x0000__x0000__x0000__x0000__x0000__x0000__x0000__x0000__x0000__x0000__x0000__x0000__x0000__x0000__x0000__x0000__x0000__x0000__x0000__x0000__x0000__x0000__x0000__x0000__x0000__x0000__x0000__x0000__x0000__x0000__x0000__x0000__x0000_…	Ban Nong Khon Thai	Point	15.7805	102.166	google map	FECT			531	254	47.8
231	Thailand	The present situation of paragonimiasis in endemic area in Phitsanulok Province	Waree P, Polseela P, Pannarunothai S, Pipitgool V	The Southeast Asian Journal of Tropical Medicine and Public Health	2001	32	2	51	54	community	Cross-sectional study	Oct	Mar	1999	2000	PHITSANULOK	Noen Maprang	Wang Yang subdistrict	Sai Dong Yang village	Point	16.4354	100.741	google map	FECT	<10	>60	392	50	12.76
232	Thailand	The present situation of paragonimiasis in endemic area in Phitsanulok Province	Waree P, Polseela P, Pannarunothai S, Pipitgool V	The Southeast Asian Journal of Tropical Medicine and Public Health	2001	32	2	51	54	community	Cross-sectional study	Oct	Mar	1999	2000	PHITSANULOK	Noen Maprang	Ban Mung	Huay Bo Tong	Point	16.4878	100.73	google map	FECT	<10	>60	192	13	6.77
233	Thailand	Toward integrated opisthorchiasis control in northeast Thailand: the Lawa project	Sripa B, Tangkawattana S, Laha T, Kaewkes S, Mallory FF, Smith JF, Wilcox BA	Acta Tropica	2015	141	Pt B	361	367	community	Baseline of a follow-up treatment			2008	2008	Khon Kaen	Lawa Lake	_x0000__x0000__x0000__x0000__x0000__x0000__x0000__x0000__x0000__x0000__x0000__x0000__x0000__x0000__x0000__x0000__x0000__x0000__x0000__x0000__x0000__x0000__x0000__x0000__x0000__x0000__x0000__x0000__x0000__x0000__x0000__x0000__x0000__x0000__x0000__x0000__x0000__x0000__x0000__x0000__x0000__x0000__x0000__x0000__x0000__x0000__x0000__x0000__x0000__x0000__x0000__x0000__x0000__x0000__x0000__x0000__x0000_…	MP	Point	16.0823	102.659	google map	Not stated or missing					58
234	Thailand	Toward integrated opisthorchiasis control in northeast Thailand: the Lawa project	Sripa B, Tangkawattana S, Laha T, Kaewkes S, Mallory FF, Smith JF, Wilcox BA	Acta Tropica	2015	141	Pt B	361	367	community	Baseline of a follow-up treatment			2008	2008	Khon Kaen	Lawa Lake	_x0000__x0000__x0000__x0000__x0000__x0000__x0000__x0000__x0000__x0000__x0000__x0000__x0000__x0000__x0000__x0000__x0000__x0000__x0000__x0000__x0000__x0000__x0000__x0000__x0000__x0000__x0000__x0000__x0000__x0000__x0000__x0000__x0000__x0000__x0000__x0000__x0000__x0000__x0000__x0000__x0000__x0000__x0000__x0000__x0000__x0000__x0000__x0000__x0000__x0000__x0000__x0000__x0000__x0000__x0000__x0000__x0000_…	NLM	Point	16.1196	102.692	google map	Not stated or missing					69
235	Thailand	Toward integrated opisthorchiasis control in northeast Thailand: the Lawa project	Sripa B, Tangkawattana S, Laha T, Kaewkes S, Mallory FF, Smith JF, Wilcox BA	Acta Tropica	2015	141	Pt B	361	367	community	Baseline of a follow-up treatment			2008	2008	Khon Kaen	Lawa Lake	_x0000__x0000__x0000__x0000__x0000__x0000__x0000__x0000__x0000__x0000__x0000__x0000__x0000__x0000__x0000__x0000__x0000__x0000__x0000__x0000__x0000__x0000__x0000__x0000__x0000__x0000__x0000__x0000__x0000__x0000__x0000__x0000__x0000__x0000__x0000__x0000__x0000__x0000__x0000__x0000__x0000__x0000__x0000__x0000__x0000__x0000__x0000__x0000__x0000__x0000__x0000__x0000__x0000__x0000__x0000__x0000__x0000_…	PAO	Point	16.1283	102.712	google map	Not stated or missing					65
236	Thailand	Toward integrated opisthorchiasis control in northeast Thailand: the Lawa project	Sripa B, Tangkawattana S, Laha T, Kaewkes S, Mallory FF, Smith JF, Wilcox BA	Acta Tropica	2015	141	Pt B	361	367	community	Baseline of a follow-up treatment			2008	2008	Khon Kaen	Lawa Lake	_x0000__x0000__x0000__x0000__x0000__x0000__x0000__x0000__x0000__x0000__x0000__x0000__x0000__x0000__x0000__x0000__x0000__x0000__x0000__x0000__x0000__x0000__x0000__x0000__x0000__x0000__x0000__x0000__x0000__x0000__x0000__x0000__x0000__x0000__x0000__x0000__x0000__x0000__x0000__x0000__x0000__x0000__x0000__x0000__x0000__x0000__x0000__x0000__x0000__x0000__x0000__x0000__x0000__x0000__x0000__x0000__x0000_…	KS	Point	16.1346	102.695	google map	Not stated or missing					67
237	Thailand	Toward integrated opisthorchiasis control in northeast Thailand: the Lawa project	Sripa B, Tangkawattana S, Laha T, Kaewkes S, Mallory FF, Smith JF, Wilcox BA	Acta Tropica	2015	141	Pt B	361	367	community	Baseline of a follow-up treatment			2008	2008	Khon Kaen	Lawa Lake	_x0000__x0000__x0000__x0000__x0000__x0000__x0000__x0000__x0000__x0000__x0000__x0000__x0000__x0000__x0000__x0000__x0000__x0000__x0000__x0000__x0000__x0000__x0000__x0000__x0000__x0000__x0000__x0000__x0000__x0000__x0000__x0000__x0000__x0000__x0000__x0000__x0000__x0000__x0000__x0000__x0000__x0000__x0000__x0000__x0000__x0000__x0000__x0000__x0000__x0000__x0000__x0000__x0000__x0000__x0000__x0000__x0000_…	PD	Point	16.1346	102.695	google map	Not stated or missing					42
238	Thailand	Toward integrated opisthorchiasis control in northeast Thailand: the Lawa project	Sripa B, Tangkawattana S, Laha T, Kaewkes S, Mallory FF, Smith JF, Wilcox BA	Acta Tropica	2015	141	Pt B	361	367	community	Baseline of a follow-up treatment			2008	2008	Khon Kaen	Lawa Lake	_x0000__x0000__x0000__x0000__x0000__x0000__x0000__x0000__x0000__x0000__x0000__x0000__x0000__x0000__x0000__x0000__x0000__x0000__x0000__x0000__x0000__x0000__x0000__x0000__x0000__x0000__x0000__x0000__x0000__x0000__x0000__x0000__x0000__x0000__x0000__x0000__x0000__x0000__x0000__x0000__x0000__x0000__x0000__x0000__x0000__x0000__x0000__x0000__x0000__x0000__x0000__x0000__x0000__x0000__x0000__x0000__x0000_…	NHC	Point	16.1446	102.704	google map	Not stated or missing					36
239	Thailand	Ultrasonographic study of the biliary system in opisthorchiasis patients after treatment with praziquantel	Pungpak S, Sornmani S, Suntharasamai P, Vivatanasesth P	The Southeast Asian Journal of Tropical Medicine and Public Health	1989	20	1	157	162	community	Baseline of a follow-up treatment	_x0000__x0000__x0000__x0000__x0000__x0000__x0000__x0000__x0000__x0000_	_x0000__x0000__x0000__x0000__x0000__x0000__x0000__x0000__x0000__x0000__x0000_	1981	1981	Khan Kaen Province	_x0000__x0000__x0000__x0000__x0000__x0000__x0000__x0000__x0000__x0000__x0000__x0000__x0000__x0000__x0000__x0000__x0000__x0000__x0000__x0000__x0000__x0000__x0000__x0000__x0000__x0000__x0000__x0000__x0000__x0000__x0000__x0000__x0000__x0000__x0000__x0000__x0000__x0000__x0000__x0000__x0000__x0000__x0000__x0000__x0000__x0000__x0000__x0000__x0000__x0000__x0000__x0000__x0000__x0000__x0000__x0000__x0000_	_x0000__x0000__x0000__x0000__x0000__x0000__x0000__x0000__x0000__x0000__x0000__x0000__x0000__x0000__x0000__x0000__x0000__x0000__x0000__x0000__x0000__x0000__x0000__x0000__x0000__x0000__x0000__x0000__x0000__x0000__x0000__x0000__x0000__x0000__x0000__x0000__x0000__x0000__x0000__x0000__x0000__x0000__x0000__x0000__x0000__x0000__x0000__x0000__x0000__x0000__x0000__x0000__x0000__x0000__x0000__x0000__x0000_…	Bung Swang, Non Hua Chang and Nong Sang village	Point	16.5679	102.913	google map	Combined (FECT & Stoll's)	15	87	1384		57
240	Thailand	Uncovering the Pathogenic Landscape of Helminth (Opisthorchis viverrini) Infections: A Cross-Sectional Study on Contributions of Physical and Social Environment and Healthcare Interventions	Ong X, Wang YC, Sithithaworn P, Namsanor J, Taylor D, Laithavewat L	PLOS Neglected Tropical Diseases	2016	10	12	5175	_x0000__x0000__x0000__x0000__x0000__x0000_	community	Cross-sectional study	Aug	Dec	2014	2014	Khon Kean	_x0000__x0000__x0000__x0000__x0000__x0000__x0000__x0000__x0000__x0000__x0000__x0000__x0000__x0000__x0000__x0000__x0000__x0000__x0000__x0000__x0000__x0000__x0000__x0000__x0000__x0000__x0000__x0000__x0000__x0000__x0000__x0000__x0000__x0000__x0000__x0000__x0000__x0000__x0000__x0000__x0000__x0000__x0000__x0000__x0000__x0000__x0000__x0000__x0000__x0000__x0000__x0000__x0000__x0000__x0000__x0000__x0000_	_x0000__x0000__x0000__x0000__x0000__x0000__x0000__x0000__x0000__x0000__x0000__x0000__x0000__x0000__x0000__x0000__x0000__x0000__x0000__x0000__x0000__x0000__x0000__x0000__x0000__x0000__x0000__x0000__x0000__x0000__x0000__x0000__x0000__x0000__x0000__x0000__x0000__x0000__x0000__x0000__x0000__x0000__x0000__x0000__x0000__x0000__x0000__x0000__x0000__x0000__x0000__x0000__x0000__x0000__x0000__x0000__x0000_…	Fa Luam	Point	16.5256	102.479	google map	Not stated or missing	21		97		40.21
241	Thailand	Uncovering the Pathogenic Landscape of Helminth (Opisthorchis viverrini) Infections: A Cross-Sectional Study on Contributions of Physical and Social Environment and Healthcare Interventions	Ong X, Wang YC, Sithithaworn P, Namsanor J, Taylor D, Laithavewat L	PLOS Neglected Tropical Diseases	2016	10	12	5175	_x0000__x0000__x0000__x0000__x0000__x0000_	community	Cross-sectional study	Aug	Dec	2014	2014	Khon Kean	_x0000__x0000__x0000__x0000__x0000__x0000__x0000__x0000__x0000__x0000__x0000__x0000__x0000__x0000__x0000__x0000__x0000__x0000__x0000__x0000__x0000__x0000__x0000__x0000__x0000__x0000__x0000__x0000__x0000__x0000__x0000__x0000__x0000__x0000__x0000__x0000__x0000__x0000__x0000__x0000__x0000__x0000__x0000__x0000__x0000__x0000__x0000__x0000__x0000__x0000__x0000__x0000__x0000__x0000__x0000__x0000__x0000_	_x0000__x0000__x0000__x0000__x0000__x0000__x0000__x0000__x0000__x0000__x0000__x0000__x0000__x0000__x0000__x0000__x0000__x0000__x0000__x0000__x0000__x0000__x0000__x0000__x0000__x0000__x0000__x0000__x0000__x0000__x0000__x0000__x0000__x0000__x0000__x0000__x0000__x0000__x0000__x0000__x0000__x0000__x0000__x0000__x0000__x0000__x0000__x0000__x0000__x0000__x0000__x0000__x0000__x0000__x0000__x0000__x0000_…	Pho Tak	Point	16.5281	102.547	google map	Not stated or missing	21		168		18.45
242	Thailand	Uncovering the Pathogenic Landscape of Helminth (Opisthorchis viverrini) Infections: A Cross-Sectional Study on Contributions of Physical and Social Environment and Healthcare Interventions	Ong X, Wang YC, Sithithaworn P, Namsanor J, Taylor D, Laithavewat L	PLOS Neglected Tropical Diseases	2016	10	12	5175	_x0000__x0000__x0000__x0000__x0000__x0000_	community	Cross-sectional study	Aug	Dec	2014	2014	Nong Bua Lamphu	_x0000__x0000__x0000__x0000__x0000__x0000__x0000__x0000__x0000__x0000__x0000__x0000__x0000__x0000__x0000__x0000__x0000__x0000__x0000__x0000__x0000__x0000__x0000__x0000__x0000__x0000__x0000__x0000__x0000__x0000__x0000__x0000__x0000__x0000__x0000__x0000__x0000__x0000__x0000__x0000__x0000__x0000__x0000__x0000__x0000__x0000__x0000__x0000__x0000__x0000__x0000__x0000__x0000__x0000__x0000__x0000__x0000_	_x0000__x0000__x0000__x0000__x0000__x0000__x0000__x0000__x0000__x0000__x0000__x0000__x0000__x0000__x0000__x0000__x0000__x0000__x0000__x0000__x0000__x0000__x0000__x0000__x0000__x0000__x0000__x0000__x0000__x0000__x0000__x0000__x0000__x0000__x0000__x0000__x0000__x0000__x0000__x0000__x0000__x0000__x0000__x0000__x0000__x0000__x0000__x0000__x0000__x0000__x0000__x0000__x0000__x0000__x0000__x0000__x0000_…	Sai Mun	Point	16.8328	102.368	google map	Not stated or missing	21		195		4.62
243	Thailand	Uncovering the Pathogenic Landscape of Helminth (Opisthorchis viverrini) Infections: A Cross-Sectional Study on Contributions of Physical and Social Environment and Healthcare Interventions	Ong X, Wang YC, Sithithaworn P, Namsanor J, Taylor D, Laithavewat L	PLOS Neglected Tropical Diseases	2016	10	12	5175	_x0000__x0000__x0000__x0000__x0000__x0000_	community	Cross-sectional study	Aug	Dec	2014	2014	Nong Bua Lamphu	_x0000__x0000__x0000__x0000__x0000__x0000__x0000__x0000__x0000__x0000__x0000__x0000__x0000__x0000__x0000__x0000__x0000__x0000__x0000__x0000__x0000__x0000__x0000__x0000__x0000__x0000__x0000__x0000__x0000__x0000__x0000__x0000__x0000__x0000__x0000__x0000__x0000__x0000__x0000__x0000__x0000__x0000__x0000__x0000__x0000__x0000__x0000__x0000__x0000__x0000__x0000__x0000__x0000__x0000__x0000__x0000__x0000_	_x0000__x0000__x0000__x0000__x0000__x0000__x0000__x0000__x0000__x0000__x0000__x0000__x0000__x0000__x0000__x0000__x0000__x0000__x0000__x0000__x0000__x0000__x0000__x0000__x0000__x0000__x0000__x0000__x0000__x0000__x0000__x0000__x0000__x0000__x0000__x0000__x0000__x0000__x0000__x0000__x0000__x0000__x0000__x0000__x0000__x0000__x0000__x0000__x0000__x0000__x0000__x0000__x0000__x0000__x0000__x0000__x0000_…	Huai Bong	Point	16.8513	102.402	google map	Not stated or missing	21		172		6.4
244	Vietnam	Current status of fish-borne zoonotic trematode infections in Gia Vien district, Ninh Binh province, Vietnam	Hung NM, Dung DT, Lan Anh NT, Van PT, Thanh BN, Van Ha N, Van Hien H, Canh LX	Parasites & Vectors	2015	8	_x0000__x0000__x0000__x0000__x0000_	21	_x0000__x0000__x0000__x0000__x0000__x0000_	community	Cross-sectional study	Aug	Feb	2011	2012	Ninh Binh Province	Gia Vien district	Gia Thinh communes	Gia Thinh communes	Point	20.3354	105.818	google map	Kato-Katz	<19	>59	962	0	0
245	Vietnam	Current status of fish-borne zoonotic trematode infections in Gia Vien district, Ninh Binh province, Vietnam	Hung NM, Dung DT, Lan Anh NT, Van PT, Thanh BN, Van Ha N, Van Hien H, Canh LX	Parasites & Vectors	2015	8	_x0000__x0000__x0000__x0000__x0000_	21	_x0000__x0000__x0000__x0000__x0000__x0000_	community	Cross-sectional study	Aug	Feb	2011	2012	Ninh Binh Province	Gia Vien district	Gia Minh communes	Gia Minh communes	Point	20.3424	105.801	google map	Kato-Katz	<19	>59	895	0	0
246	Vietnam	Human infections of fish-borne trematodes in Vietnam: prevalence and molecular specific identification at an endemic commune in Nam Dinh province	De NV, Le TH	Experimental Parasitology	2011	129	4	355	361	community	Cross-sectional study	Jan	Dec	2009	2010	Nam Dinh province	Nghia Hung district	Rang Dong commune	Rang Dong commune	Point	19.9899	106.145	google map	Kato-Katz	<10	≥60	405	0	0			205	0	0	200	0	0
247	Vietnam	Opisthorchis viverrini infections and associated risk factors in a lowland area of Binh Dinh Province, Central Vietnam	Dao TT, Bui TV, Abatih EN, Gabriel S, Nguyen TT, Huynh QH, Nguyen CV, Dorny P	Acta Tropica	2016	157	_x0000__x0000__x0000__x0000__x0000_	151	157	community	Cross-sectional study	Jun	Jun	2015	2015	Binh Dinh	Phu My District	_x0000__x0000__x0000__x0000__x0000__x0000__x0000__x0000__x0000__x0000__x0000__x0000__x0000__x0000__x0000__x0000__x0000__x0000__x0000__x0000__x0000__x0000__x0000__x0000__x0000__x0000__x0000__x0000__x0000__x0000__x0000__x0000__x0000__x0000__x0000__x0000__x0000__x0000__x0000__x0000__x0000__x0000__x0000__x0000__x0000__x0000__x0000__x0000__x0000__x0000__x0000__x0000__x0000__x0000__x0000__x0000__x0000_…	My Tho Commune	Point	14.2216	109.139	google map	Kato-Katz	7	>60	254	29	11.4			136	26	19.1	118	3	2.5
248	Vietnam	Prevalence, intensity and risk factors for clonorchiasis and possible use of questionnaires to detect individuals at risk in northern Vietnam	Dang TC, Yajima A, Nguyen VK, Montresor A	Transactions of the Royal Society of Tropical Medicine and Hygiene	2008	102	12	1263	1268	community	Cross-sectional study	_x0000__x0000__x0000__x0000__x0000__x0000__x0000__x0000__x0000__x0000_	_x0000__x0000__x0000__x0000__x0000__x0000__x0000__x0000__x0000__x0000__x0000_	1999	2000	Ninh Binh province	Kim Son district	in two communes (Tan Thanh and Yen Loc)	in two communes (Tan Thanh and Yen Loc)	Point	20.0895	106.068	google map	Kato-Katz	2	79	1155		0					33.8			11
249	Thailand	A pilot project for controlling O. viverrini infection in Nong Wai, Northeast Thailand, by applying praziquantel and other measures	Sornmani S, Schelp FP, Vivatanasesth P, Patihatakorn W, Impand P, Sitabutra P, Worasan P, Preuksaraj S	Arzneimittel-Forschung	1984	34	9b	1231	1234	community	Baseline of a randomized clinical trial	May	May	1981	1981	Khon Kaen	_x0000__x0000__x0000__x0000__x0000__x0000__x0000__x0000__x0000__x0000__x0000__x0000__x0000__x0000__x0000__x0000__x0000__x0000__x0000__x0000__x0000__x0000__x0000__x0000__x0000__x0000__x0000__x0000__x0000__x0000__x0000__x0000__x0000__x0000__x0000__x0000__x0000__x0000__x0000__x0000__x0000__x0000__x0000__x0000__x0000__x0000__x0000__x0000__x0000__x0000__x0000__x0000__x0000__x0000__x0000__x0000__x0000_	Nong Wai Irrigation Area		ADM3	16.4885	102.887	google map	Not stated or missing			942		58.3
250	Thailand	A pilot project for controlling O. viverrini infection in Nong Wai, Northeast Thailand, by applying praziquantel and other measures	Sornmani S, Schelp FP, Vivatanasesth P, Patihatakorn W, Impand P, Sitabutra P, Worasan P, Preuksaraj S	Arzneimittel-Forschung	1984	34	10b	1231	1234	community	Baseline of a randomized clinical trial	May	May	1981	1981	Khon Kaen	_x0000__x0000__x0000__x0000__x0000__x0000__x0000__x0000__x0000__x0000__x0000__x0000__x0000__x0000__x0000__x0000__x0000__x0000__x0000__x0000__x0000__x0000__x0000__x0000__x0000__x0000__x0000__x0000__x0000__x0000__x0000__x0000__x0000__x0000__x0000__x0000__x0000__x0000__x0000__x0000__x0000__x0000__x0000__x0000__x0000__x0000__x0000__x0000__x0000__x0000__x0000__x0000__x0000__x0000__x0000__x0000__x0000_	Nong Wai Irrigation Area		ADM3	16.4885	102.887	google map	Not stated or missing			442		55.1
251	Thailand	A study of liver fluke infection in Sukhothai, Thailand	Jadsri S, Noojoy A	The Southeast Asian Journal of Tropical Medicine and Public Health	1999	30	3	588	593	community	Cross-sectional study	Aug	Sep	1993	1993	Sukhothai	Sawaskhalok	Nai Muaeng		ADM3	17.3268	99.8702	google map	Not stated or missing	1	>65	1964	384	19.55
252	Thailand	Advances in the Diagnosis of Human Opisthorchiasis: Development of Opisthorchis viverrini Antigen Detection in Urine	Worasith C, Kamamia C, Yakovleva A, Duenngai K, Wangboon C, Sithithaworn J, Watwiengkam N, Namwat N, Techasen A, Loilome W, Yongvanit P, Loukas A, Sithithaworn P, Bethony JM	PLOS Neglected Tropical Diseases	2015	9	10	e0004157	_x0000__x0000__x0000__x0000__x0000__x0000_	community	Cross-sectional study	Dec	Dec	2013	2014	Khon Kaen province	_x0000__x0000__x0000__x0000__x0000__x0000__x0000__x0000__x0000__x0000__x0000__x0000__x0000__x0000__x0000__x0000__x0000__x0000__x0000__x0000__x0000__x0000__x0000__x0000__x0000__x0000__x0000__x0000__x0000__x0000__x0000__x0000__x0000__x0000__x0000__x0000__x0000__x0000__x0000__x0000__x0000__x0000__x0000__x0000__x0000__x0000__x0000__x0000__x0000__x0000__x0000__x0000__x0000__x0000__x0000__x0000__x0000_	Don Chang sub-district		ADM3	16.3583	102.759	google map	FECT			235	125	53.19
253	Thailand	An investigation of the health and nutritional status of the population in the Nam Pong Water Resource Development Project, northeast Thailand	Sornmani S, Schelp FP, Vivatanasesth P, Pongpaew P, Sritabutra P, Supawan V, Vudhivai N, Egormaiphol S, Harinasuta C	Annals of tropical medicine and parasitology	1981	75	3	335	346	community	Cross-sectional study	_x0000__x0000__x0000__x0000__x0000__x0000__x0000__x0000__x0000__x0000_	_x0000__x0000__x0000__x0000__x0000__x0000__x0000__x0000__x0000__x0000__x0000_			_x0000__x0000__x0000__x0000__x0000__x0000__x0000__x0000__x0000__x0000__x0000__x0000__x0000__x0000__x0000__x0000__x0000__x0000__x0000__x0000__x0000__x0000__x0000__x0000__x0000__x0000__x0000__x0000__x0000__x0000_	Nam Pong Water Resource	Lakeside		ADM3	16.579	102.515	google map	Not stated or missing	0	>15	2946	557	18.91
254	Thailand	Comparing the performance of urine and copro-antigen detection in evaluating Opisthorchis viverrini infection in communities with different transmission levels in Northeast Thailand	Worasith C, Wangboon C, Duenngai K, Kiatsopit N, Kopolrat K, Techasen A, Sithithaworn J, Khuntikeo N, Loilome W, Namwat N, Yongvanit P, Carlton EJ, Sithithaworn P	PLOS Neglected Tropical Diseases	2019	13	2	7186	_x0000__x0000__x0000__x0000__x0000__x0000_	community	Cross-sectional study	Mar	Jul	2015	2016	Chaiyaphum Province	_x0000__x0000__x0000__x0000__x0000__x0000__x0000__x0000__x0000__x0000__x0000__x0000__x0000__x0000__x0000__x0000__x0000__x0000__x0000__x0000__x0000__x0000__x0000__x0000__x0000__x0000__x0000__x0000__x0000__x0000__x0000__x0000__x0000__x0000__x0000__x0000__x0000__x0000__x0000__x0000__x0000__x0000__x0000__x0000__x0000__x0000__x0000__x0000__x0000__x0000__x0000__x0000__x0000__x0000__x0000__x0000__x0000_	Nong Khon Thai sub-district		ADM3	16.4538	102.186	google map	FECT	<20	>60	204	27	14
255	Thailand	Comparing the performance of urine and copro-antigen detection in evaluating Opisthorchis viverrini infection in communities with different transmission levels in Northeast Thailand	Worasith C, Wangboon C, Duenngai K, Kiatsopit N, Kopolrat K, Techasen A, Sithithaworn J, Khuntikeo N, Loilome W, Namwat N, Yongvanit P, Carlton EJ, Sithithaworn P	PLOS Neglected Tropical Diseases	2019	13	2	7186	_x0000__x0000__x0000__x0000__x0000__x0000_	community	Cross-sectional study	Mar	Jul	2015	2016	Khon Kaen Province	_x0000__x0000__x0000__x0000__x0000__x0000__x0000__x0000__x0000__x0000__x0000__x0000__x0000__x0000__x0000__x0000__x0000__x0000__x0000__x0000__x0000__x0000__x0000__x0000__x0000__x0000__x0000__x0000__x0000__x0000__x0000__x0000__x0000__x0000__x0000__x0000__x0000__x0000__x0000__x0000__x0000__x0000__x0000__x0000__x0000__x0000__x0000__x0000__x0000__x0000__x0000__x0000__x0000__x0000__x0000__x0000__x0000_	Ban Wa sub-district		ADM3	16.3862	102.72	google map	FECT	<20	>60	558	367	66
256	Thailand	Comparing the performance of urine and copro-antigen detection in evaluating Opisthorchis viverrini infection in communities with different transmission levels in Northeast Thailand	Worasith C, Wangboon C, Duenngai K, Kiatsopit N, Kopolrat K, Techasen A, Sithithaworn J, Khuntikeo N, Loilome W, Namwat N, Yongvanit P, Carlton EJ, Sithithaworn P	PLOS Neglected Tropical Diseases	2019	13	2	7186	_x0000__x0000__x0000__x0000__x0000__x0000_	community	Cross-sectional study	Mar	Jul	2015	2016	Sakon Nakhon Province	_x0000__x0000__x0000__x0000__x0000__x0000__x0000__x0000__x0000__x0000__x0000__x0000__x0000__x0000__x0000__x0000__x0000__x0000__x0000__x0000__x0000__x0000__x0000__x0000__x0000__x0000__x0000__x0000__x0000__x0000__x0000__x0000__x0000__x0000__x0000__x0000__x0000__x0000__x0000__x0000__x0000__x0000__x0000__x0000__x0000__x0000__x0000__x0000__x0000__x0000__x0000__x0000__x0000__x0000__x0000__x0000__x0000_	Tao Ngoi sub-district		ADM3	16.9186	104.163	google map	FECT	<20	>60	281	154	55
257	Thailand	Current high prevalences of Strongyloides stercoralis and Opisthorchis viverrini infections in rural communities in northeast Thailand and associated risk factors	Laoraksawong P, Sanpool O, Rodpai R, Thanchomnang T, Kanarkard W, Maleewong W, Kraiklang R, Intapan PM	BMC Public Health	2018	18	1	940	_x0000__x0000__x0000__x0000__x0000__x0000_	community	Cross-sectional study	Dec	Jun	2016	2017	Khon Kaen province	Mueang Khon Kaen District	Samran sub-district		ADM3	16.4818	102.891	google map	FECT	11	91	204	41	20
258	Thailand	Current high prevalences of Strongyloides stercoralis and Opisthorchis viverrini infections in rural communities in northeast Thailand and associated risk factors	Laoraksawong P, Sanpool O, Rodpai R, Thanchomnang T, Kanarkard W, Maleewong W, Kraiklang R, Intapan PM	BMC Public Health	2018	18	1	940	_x0000__x0000__x0000__x0000__x0000__x0000_	community	Cross-sectional study	Dec	Jun	2016	2017	Khon Kaen province	Mueang Khon Kaen District	Bueng Niam sub-district		ADM3	16.4363	102.918	google map	FECT	11	91	183	34	18.6
259	Thailand	Epidemiology of Opisthorchis viverrini in an endemic area of Thailand, an integrative approach	Prakobwong S, Gunnula W, Chaipibool S, Nimala B, Sangthopo J, Sirivetthumrong N, Ribas A	Helminthologia	2017	54	4SI	289	306	community	Cross-sectional study	Jun	Jul	2014	2016	Udon Thani	_x0000__x0000__x0000__x0000__x0000__x0000__x0000__x0000__x0000__x0000__x0000__x0000__x0000__x0000__x0000__x0000__x0000__x0000__x0000__x0000__x0000__x0000__x0000__x0000__x0000__x0000__x0000__x0000__x0000__x0000__x0000__x0000__x0000__x0000__x0000__x0000__x0000__x0000__x0000__x0000__x0000__x0000__x0000__x0000__x0000__x0000__x0000__x0000__x0000__x0000__x0000__x0000__x0000__x0000__x0000__x0000__x0000_	Nam Phon		ADM3	17.3158	102.513	google map	FECT	20	82	2762	1347	49.7
260	Thailand	Epidemiology of Opisthorchis viverrini in an endemic area of Thailand, an integrative approach	Prakobwong S, Gunnula W, Chaipibool S, Nimala B, Sangthopo J, Sirivetthumrong N, Ribas A	Helminthologia	2017	54	4SI	289	306	community	Cross-sectional study	Jun	Jul	2014	2016	Udon Thani	_x0000__x0000__x0000__x0000__x0000__x0000__x0000__x0000__x0000__x0000__x0000__x0000__x0000__x0000__x0000__x0000__x0000__x0000__x0000__x0000__x0000__x0000__x0000__x0000__x0000__x0000__x0000__x0000__x0000__x0000__x0000__x0000__x0000__x0000__x0000__x0000__x0000__x0000__x0000__x0000__x0000__x0000__x0000__x0000__x0000__x0000__x0000__x0000__x0000__x0000__x0000__x0000__x0000__x0000__x0000__x0000__x0000_	Nong Bua Ban		ADM3	17.3159	102.616	google map	FECT	20	82	1518	221	14.5
261	Thailand	Epidemiology of Opisthorchis viverrini in an endemic area of Thailand, an integrative approach	Prakobwong S, Gunnula W, Chaipibool S, Nimala B, Sangthopo J, Sirivetthumrong N, Ribas A	Helminthologia	2017	54	4SI	289	306	community	Cross-sectional study	Jun	Jul	2014	2016	Udon Thani	_x0000__x0000__x0000__x0000__x0000__x0000__x0000__x0000__x0000__x0000__x0000__x0000__x0000__x0000__x0000__x0000__x0000__x0000__x0000__x0000__x0000__x0000__x0000__x0000__x0000__x0000__x0000__x0000__x0000__x0000__x0000__x0000__x0000__x0000__x0000__x0000__x0000__x0000__x0000__x0000__x0000__x0000__x0000__x0000__x0000__x0000__x0000__x0000__x0000__x0000__x0000__x0000__x0000__x0000__x0000__x0000__x0000_	Khok Sa-ard		ADM3	17.3504	102.641	google map	FECT	20	82	1067	93	8.7
262	Thailand	Fish sharing as a risk factor for Opisthorchis viverrini infection: evidence from two villages in north-eastern Thailand	Saenna P, Hurst C, Echaubard P, Wilcox BA, Sripa B	Infectious Diseases of Poverty	2017	6	1	66	_x0000__x0000__x0000__x0000__x0000__x0000_	community	Baseline of a follow-up treatment	_x0000__x0000__x0000__x0000__x0000__x0000__x0000__x0000__x0000__x0000_	_x0000__x0000__x0000__x0000__x0000__x0000__x0000__x0000__x0000__x0000__x0000_			Maha Sarakham Province	Kosum Phisai District	Pon Ngam sub-district		ADM3	16.3506	102.937	google map	FECT			552	178	32.2
263	Thailand	Infection with Opisthorchis viverrini and use of praziquantel among a working-age population in northeast Thailand	Saengsawang P, Promthet S, Bradshaw P	Asian Pacific Journal of Cancer Prevention	2013	14	5	2963	2966	community	Cross-sectional study	Jan	Mar	2012	2012	Yasothon	Maha Chana Chai	Hua Mueang		ADM3	15.5652	104.204	google map	Kato-Katz	20	65	684	255	37.28			310	127	40.97	374	128	34.2
264	Thailand	Opisthorchis viverrini infection in minute intestinal fluke endemic areas of Chiang Mai Province, Thailand	Nithikathkul C, Pumidonming W, Wannapinyosheep S, Tesana S, Chaiprapathong S, Wongsawad C	Asian Biomedicine	2009	3	2	187	191	community	Cross-sectional study	Jan	Jan	2007	2007	Chiang Mai	Mae Taeng	Ban Pao		ADM3	19.2153	99.0497	google map	FECT	<10	>60	70	1	1.4			32	1	3.1	38	0	0
265	Thailand	Opisthorchis viverrini infection in minute intestinal fluke endemic areas of Chiang Mai Province, Thailand	Nithikathkul C, Pumidonming W, Wannapinyosheep S, Tesana S, Chaiprapathong S, Wongsawad C	Asian Biomedicine	2009	3	2	187	191	community	Cross-sectional study	Jan	Jan	2007	2007	Chiang Mai	Mae Taeng	Cho Lae		ADM3	19.1585	99.0898	google map	FECT	<10	>60	86	27	31.4			41	18	43.9	45	9	20
266	Thailand	Opisthorchis viverrini infection in minute intestinal fluke endemic areas of Chiang Mai Province, Thailand	Nithikathkul C, Pumidonming W, Wannapinyosheep S, Tesana S, Chaiprapathong S, Wongsawad C	Asian Biomedicine	2009	3	2	187	191	community	Cross-sectional study	Jan	Jan	2007	2007	Chiang Mai	San Sai	Nong Yaeng		ADM3	18.9081	99.1066	google map	FECT	<10	>60	84	3	3.5			35	1	2.9	49	2	4.1
267	Thailand	Opisthorchis viverrini infection in minute intestinal fluke endemic areas of Chiang Mai Province, Thailand	Nithikathkul C, Pumidonming W, Wannapinyosheep S, Tesana S, Chaiprapathong S, Wongsawad C	Asian Biomedicine	2009	3	2	187	191	community	Cross-sectional study	Jan	Jan	2007	2007	Chiang Mai	Doi Saket	Luang Nuea		ADM3	18.9654	99.2343	google map	FECT	<10	>60	87	5	5.7			36	1	2.8	51	4	7.8
268	Thailand	Overweight Relation to Liver Fluke Infection among Rural Participants from 4 Districts of Nakhon Ratchasima Province, Thailand	Kaewpitoon SJ, Rujirakul R, Wakkuwattapong P, Matrakool L, Tongtawee T, Panpimanmas S, Kujapun J, Norkaew J, Photipim M, Ponphimai S, Chavengkun W, Kompor P, Padchasuwan N, Sawaspol S, Phandee MC, Phandee W, Phanurak W, Kaewpitoon N	Asian Pacific Journal of Cancer Prevention	2016	17	5	2565	2571	community	Cross-sectional study	Jun	Mar	2015	2016	Nakhon Ratchasima	Kaeng Sanam Nang district	Si Suk		ADM3	15.6679	102.161	google map	Kato-Katz	≤40	≥61	80	1	1.25
269	Thailand	Overweight Relation to Liver Fluke Infection among Rural Participants from 4 Districts of Nakhon Ratchasima Province, Thailand	Kaewpitoon SJ, Rujirakul R, Wakkuwattapong P, Matrakool L, Tongtawee T, Panpimanmas S, Kujapun J, Norkaew J, Photipim M, Ponphimai S, Chavengkun W, Kompor P, Padchasuwan N, Sawaspol S, Phandee MC, Phandee W, Phanurak W, Kaewpitoon N	Asian Pacific Journal of Cancer Prevention	2016	17	5	2565	2571	community	Cross-sectional study	Jun	Mar	2015	2016	Nakhon Ratchasima	Kaeng Sanam Nang district	Bueng Samrong		ADM3	15.7187	102.203	google map	Kato-Katz	≤40	≥61	81	1	1.23
270	Thailand	Overweight Relation to Liver Fluke Infection among Rural Participants from 4 Districts of Nakhon Ratchasima Province, Thailand	Kaewpitoon SJ, Rujirakul R, Wakkuwattapong P, Matrakool L, Tongtawee T, Panpimanmas S, Kujapun J, Norkaew J, Photipim M, Ponphimai S, Chavengkun W, Kompor P, Padchasuwan N, Sawaspol S, Phandee MC, Phandee W, Phanurak W, Kaewpitoon N	Asian Pacific Journal of Cancer Prevention	2016	17	5	2565	2571	community	Cross-sectional study	Jun	Mar	2015	2016	Nakhon Ratchasima	Kaeng Sanam Nang district	Bueng Phalai		ADM3	15.6777	102.225	google map	Kato-Katz	≤40	≥61	79	0	0
271	Thailand	Overweight Relation to Liver Fluke Infection among Rural Participants from 4 Districts of Nakhon Ratchasima Province, Thailand	Kaewpitoon SJ, Rujirakul R, Wakkuwattapong P, Matrakool L, Tongtawee T, Panpimanmas S, Kujapun J, Norkaew J, Photipim M, Ponphimai S, Chavengkun W, Kompor P, Padchasuwan N, Sawaspol S, Phandee MC, Phandee W, Phanurak W, Kaewpitoon N	Asian Pacific Journal of Cancer Prevention	2016	17	5	2565	2571	community	Cross-sectional study	Jun	Mar	2015	2016	Nakhon Ratchasima	Kaeng Sanam Nang district	Kaeng Sanam Nang subdistrict		ADM3	15.7248	102.284	google map	Kato-Katz	≤40	≥61	52	1	1.92
272	Thailand	Overweight Relation to Liver Fluke Infection among Rural Participants from 4 Districts of Nakhon Ratchasima Province, Thailand	Kaewpitoon SJ, Rujirakul R, Wakkuwattapong P, Matrakool L, Tongtawee T, Panpimanmas S, Kujapun J, Norkaew J, Photipim M, Ponphimai S, Chavengkun W, Kompor P, Padchasuwan N, Sawaspol S, Phandee MC, Phandee W, Phanurak W, Kaewpitoon N	Asian Pacific Journal of Cancer Prevention	2016	17	5	2565	2571	community	Cross-sectional study	Jun	Mar	2015	2016	Nakhon Ratchasima	Bua Yai district	Huai Yang		ADM3	15.6364	102.321	google map	Kato-Katz	≤40	≥61	18	1	5.56
273	Thailand	Overweight Relation to Liver Fluke Infection among Rural Participants from 4 Districts of Nakhon Ratchasima Province, Thailand	Kaewpitoon SJ, Rujirakul R, Wakkuwattapong P, Matrakool L, Tongtawee T, Panpimanmas S, Kujapun J, Norkaew J, Photipim M, Ponphimai S, Chavengkun W, Kompor P, Padchasuwan N, Sawaspol S, Phandee MC, Phandee W, Phanurak W, Kaewpitoon N	Asian Pacific Journal of Cancer Prevention	2016	17	5	2565	2571	community	Cross-sectional study	Jun	Mar	2015	2016	Nakhon Ratchasima	Kaeng Sanam Nang district	Non Samran		ADM3	15.7504	102.329	google map	Kato-Katz	≤40	≥61	83	1	1.2
274	Thailand	Overweight Relation to Liver Fluke Infection among Rural Participants from 4 Districts of Nakhon Ratchasima Province, Thailand	Kaewpitoon SJ, Rujirakul R, Wakkuwattapong P, Matrakool L, Tongtawee T, Panpimanmas S, Kujapun J, Norkaew J, Photipim M, Ponphimai S, Chavengkun W, Kompor P, Padchasuwan N, Sawaspol S, Phandee MC, Phandee W, Phanurak W, Kaewpitoon N	Asian Pacific Journal of Cancer Prevention	2016	17	5	2565	2571	community	Cross-sectional study	Jun	Mar	2015	2016	Nakhon Ratchasima	Bua Yai district	Non Thong Lang		ADM3	15.5412	102.33	google map	Kato-Katz	≤40	≥61	15	0	0
275	Thailand	Overweight Relation to Liver Fluke Infection among Rural Participants from 4 Districts of Nakhon Ratchasima Province, Thailand	Kaewpitoon SJ, Rujirakul R, Wakkuwattapong P, Matrakool L, Tongtawee T, Panpimanmas S, Kujapun J, Norkaew J, Photipim M, Ponphimai S, Chavengkun W, Kompor P, Padchasuwan N, Sawaspol S, Phandee MC, Phandee W, Phanurak W, Kaewpitoon N	Asian Pacific Journal of Cancer Prevention	2016	17	5	2565	2571	community	Cross-sectional study	Jun	Mar	2015	2016	Nakhon Ratchasima	Bua Yai district	Nong Bua Sa-at		ADM3	15.5847	102.334	google map	Kato-Katz	≤40	≥61	15	0	0
276	Thailand	Overweight Relation to Liver Fluke Infection among Rural Participants from 4 Districts of Nakhon Ratchasima Province, Thailand	Kaewpitoon SJ, Rujirakul R, Wakkuwattapong P, Matrakool L, Tongtawee T, Panpimanmas S, Kujapun J, Norkaew J, Photipim M, Ponphimai S, Chavengkun W, Kompor P, Padchasuwan N, Sawaspol S, Phandee MC, Phandee W, Phanurak W, Kaewpitoon N	Asian Pacific Journal of Cancer Prevention	2016	17	5	2565	2571	community	Cross-sectional study	Jun	Mar	2015	2016	Nakhon Ratchasima	Bua Yai district	Khun Thong		ADM3	15.6833	102.364	google map	Kato-Katz	≤40	≥61	13	0	0
277	Thailand	Overweight Relation to Liver Fluke Infection among Rural Participants from 4 Districts of Nakhon Ratchasima Province, Thailand	Kaewpitoon SJ, Rujirakul R, Wakkuwattapong P, Matrakool L, Tongtawee T, Panpimanmas S, Kujapun J, Norkaew J, Photipim M, Ponphimai S, Chavengkun W, Kompor P, Padchasuwan N, Sawaspol S, Phandee MC, Phandee W, Phanurak W, Kaewpitoon N	Asian Pacific Journal of Cancer Prevention	2016	17	5	2565	2571	community	Cross-sectional study	Jun	Mar	2015	2016	Nakhon Ratchasima	Bua Yai district	Nong Chaeng Yai		ADM3	15.5631	102.378	google map	Kato-Katz	≤40	≥61	7	1	14.3
278	Thailand	Overweight Relation to Liver Fluke Infection among Rural Participants from 4 Districts of Nakhon Ratchasima Province, Thailand	Kaewpitoon SJ, Rujirakul R, Wakkuwattapong P, Matrakool L, Tongtawee T, Panpimanmas S, Kujapun J, Norkaew J, Photipim M, Ponphimai S, Chavengkun W, Kompor P, Padchasuwan N, Sawaspol S, Phandee MC, Phandee W, Phanurak W, Kaewpitoon N	Asian Pacific Journal of Cancer Prevention	2016	17	5	2565	2571	community	Cross-sectional study	Jun	Mar	2015	2016	Nakhon Ratchasima	Bua Yai district	Bua Yai subdistrict		ADM3	15.6168	102.395	google map	Kato-Katz	≤40	≥61	20	1	5
279	Thailand	Overweight Relation to Liver Fluke Infection among Rural Participants from 4 Districts of Nakhon Ratchasima Province, Thailand	Kaewpitoon SJ, Rujirakul R, Wakkuwattapong P, Matrakool L, Tongtawee T, Panpimanmas S, Kujapun J, Norkaew J, Photipim M, Ponphimai S, Chavengkun W, Kompor P, Padchasuwan N, Sawaspol S, Phandee MC, Phandee W, Phanurak W, Kaewpitoon N	Asian Pacific Journal of Cancer Prevention	2016	17	5	2565	2571	community	Cross-sectional study	Jun	Mar	2015	2016	Nakhon Ratchasima	Bua Yai district	Dan Chang		ADM3	15.6311	102.403	google map	Kato-Katz	≤40	≥61	20	0	0
280	Thailand	Overweight Relation to Liver Fluke Infection among Rural Participants from 4 Districts of Nakhon Ratchasima Province, Thailand	Kaewpitoon SJ, Rujirakul R, Wakkuwattapong P, Matrakool L, Tongtawee T, Panpimanmas S, Kujapun J, Norkaew J, Photipim M, Ponphimai S, Chavengkun W, Kompor P, Padchasuwan N, Sawaspol S, Phandee MC, Phandee W, Phanurak W, Kaewpitoon N	Asian Pacific Journal of Cancer Prevention	2016	17	5	2565	2571	community	Cross-sectional study	Jun	Mar	2015	2016	Nakhon Ratchasima	Bua Yai district	Sema Yai		ADM3	15.5102	102.431	google map	Kato-Katz	≤40	≥61	6	0	0
281	Thailand	Overweight Relation to Liver Fluke Infection among Rural Participants from 4 Districts of Nakhon Ratchasima Province, Thailand	Kaewpitoon SJ, Rujirakul R, Wakkuwattapong P, Matrakool L, Tongtawee T, Panpimanmas S, Kujapun J, Norkaew J, Photipim M, Ponphimai S, Chavengkun W, Kompor P, Padchasuwan N, Sawaspol S, Phandee MC, Phandee W, Phanurak W, Kaewpitoon N	Asian Pacific Journal of Cancer Prevention	2016	17	5	2565	2571	community	Cross-sectional study	Jun	Mar	2015	2016	Nakhon Ratchasima	Bua Yai district	Kut Chok		ADM3	15.5745	102.492	google map	Kato-Katz	≤40	≥61	7	0	0
282	Thailand	Overweight Relation to Liver Fluke Infection among Rural Participants from 4 Districts of Nakhon Ratchasima Province, Thailand	Kaewpitoon SJ, Rujirakul R, Wakkuwattapong P, Matrakool L, Tongtawee T, Panpimanmas S, Kujapun J, Norkaew J, Photipim M, Ponphimai S, Chavengkun W, Kompor P, Padchasuwan N, Sawaspol S, Phandee MC, Phandee W, Phanurak W, Kaewpitoon N	Asian Pacific Journal of Cancer Prevention	2016	17	5	2565	2571	community	Cross-sectional study	Jun	Mar	2015	2016	Nakhon Ratchasima	Chum Phuang	Prasuk		ADM3	15.3288	102.688	google map	Kato-Katz	≤40	≥61	11	0	0
283	Thailand	Overweight Relation to Liver Fluke Infection among Rural Participants from 4 Districts of Nakhon Ratchasima Province, Thailand	Kaewpitoon SJ, Rujirakul R, Wakkuwattapong P, Matrakool L, Tongtawee T, Panpimanmas S, Kujapun J, Norkaew J, Photipim M, Ponphimai S, Chavengkun W, Kompor P, Padchasuwan N, Sawaspol S, Phandee MC, Phandee W, Phanurak W, Kaewpitoon N	Asian Pacific Journal of Cancer Prevention	2016	17	5	2565	2571	community	Cross-sectional study	Jun	Mar	2015	2016	Nakhon Ratchasima	Chum Phuang	Sarai		ADM3	15.1733	102.718	google map	Kato-Katz	≤40	≥61	29	1	3.45
284	Thailand	Overweight Relation to Liver Fluke Infection among Rural Participants from 4 Districts of Nakhon Ratchasima Province, Thailand	Kaewpitoon SJ, Rujirakul R, Wakkuwattapong P, Matrakool L, Tongtawee T, Panpimanmas S, Kujapun J, Norkaew J, Photipim M, Ponphimai S, Chavengkun W, Kompor P, Padchasuwan N, Sawaspol S, Phandee MC, Phandee W, Phanurak W, Kaewpitoon N	Asian Pacific Journal of Cancer Prevention	2016	17	5	2565	2571	community	Cross-sectional study	Jun	Mar	2015	2016	Nakhon Ratchasima	Chum Phuang	Non Tum		ADM3	15.1408	102.72	google map	Kato-Katz	≤40	≥61	11	0	0
285	Thailand	Overweight Relation to Liver Fluke Infection among Rural Participants from 4 Districts of Nakhon Ratchasima Province, Thailand	Kaewpitoon SJ, Rujirakul R, Wakkuwattapong P, Matrakool L, Tongtawee T, Panpimanmas S, Kujapun J, Norkaew J, Photipim M, Ponphimai S, Chavengkun W, Kompor P, Padchasuwan N, Sawaspol S, Phandee MC, Phandee W, Phanurak W, Kaewpitoon N	Asian Pacific Journal of Cancer Prevention	2016	17	5	2565	2571	community	Cross-sectional study	Jun	Mar	2015	2016	Nakhon Ratchasima	Chum Phuang	Tha Lat		ADM3	15.2451	102.726	google map	Kato-Katz	≤40	≥61	29	0	0
286	Thailand	Overweight Relation to Liver Fluke Infection among Rural Participants from 4 Districts of Nakhon Ratchasima Province, Thailand	Kaewpitoon SJ, Rujirakul R, Wakkuwattapong P, Matrakool L, Tongtawee T, Panpimanmas S, Kujapun J, Norkaew J, Photipim M, Ponphimai S, Chavengkun W, Kompor P, Padchasuwan N, Sawaspol S, Phandee MC, Phandee W, Phanurak W, Kaewpitoon N	Asian Pacific Journal of Cancer Prevention	2016	17	5	2565	2571	community	Cross-sectional study	Jun	Mar	2015	2016	Nakhon Ratchasima	Chum Phuang	Nong Lak		ADM3	15.4082	102.73	google map	Kato-Katz	≤40	≥61	10	0	0
287	Thailand	Overweight Relation to Liver Fluke Infection among Rural Participants from 4 Districts of Nakhon Ratchasima Province, Thailand	Kaewpitoon SJ, Rujirakul R, Wakkuwattapong P, Matrakool L, Tongtawee T, Panpimanmas S, Kujapun J, Norkaew J, Photipim M, Ponphimai S, Chavengkun W, Kompor P, Padchasuwan N, Sawaspol S, Phandee MC, Phandee W, Phanurak W, Kaewpitoon N	Asian Pacific Journal of Cancer Prevention	2016	17	5	2565	2571	community	Cross-sectional study	Jun	Mar	2015	2016	Nakhon Ratchasima	Chum Phuang	Chum Phuang		ADM3	15.3137	102.764	google map	Kato-Katz	≤40	≥61	11	0	0
288	Thailand	Overweight Relation to Liver Fluke Infection among Rural Participants from 4 Districts of Nakhon Ratchasima Province, Thailand	Kaewpitoon SJ, Rujirakul R, Wakkuwattapong P, Matrakool L, Tongtawee T, Panpimanmas S, Kujapun J, Norkaew J, Photipim M, Ponphimai S, Chavengkun W, Kompor P, Padchasuwan N, Sawaspol S, Phandee MC, Phandee W, Phanurak W, Kaewpitoon N	Asian Pacific Journal of Cancer Prevention	2016	17	5	2565	2571	community	Cross-sectional study	Jun	Mar	2015	2016	Nakhon Ratchasima	Mueang Yang	Non Udom		ADM3	15.4336	102.775	google map	Kato-Katz	≤40	≥61	9	0	0
289	Thailand	Overweight Relation to Liver Fluke Infection among Rural Participants from 4 Districts of Nakhon Ratchasima Province, Thailand	Kaewpitoon SJ, Rujirakul R, Wakkuwattapong P, Matrakool L, Tongtawee T, Panpimanmas S, Kujapun J, Norkaew J, Photipim M, Ponphimai S, Chavengkun W, Kompor P, Padchasuwan N, Sawaspol S, Phandee MC, Phandee W, Phanurak W, Kaewpitoon N	Asian Pacific Journal of Cancer Prevention	2016	17	5	2565	2571	community	Cross-sectional study	Jun	Mar	2015	2016	Nakhon Ratchasima	Chum Phuang	Talat Sai		ADM3	15.1612	102.807	google map	Kato-Katz	≤40	≥61	15	0	0
290	Thailand	Overweight Relation to Liver Fluke Infection among Rural Participants from 4 Districts of Nakhon Ratchasima Province, Thailand	Kaewpitoon SJ, Rujirakul R, Wakkuwattapong P, Matrakool L, Tongtawee T, Panpimanmas S, Kujapun J, Norkaew J, Photipim M, Ponphimai S, Chavengkun W, Kompor P, Padchasuwan N, Sawaspol S, Phandee MC, Phandee W, Phanurak W, Kaewpitoon N	Asian Pacific Journal of Cancer Prevention	2016	17	5	2565	2571	community	Cross-sectional study	Jun	Mar	2015	2016	Nakhon Ratchasima	Chum Phuang	Non Yo		ADM3	15.3497	102.817	google map	Kato-Katz	≤40	≥61	26	2	7.69
291	Thailand	Overweight Relation to Liver Fluke Infection among Rural Participants from 4 Districts of Nakhon Ratchasima Province, Thailand	Kaewpitoon SJ, Rujirakul R, Wakkuwattapong P, Matrakool L, Tongtawee T, Panpimanmas S, Kujapun J, Norkaew J, Photipim M, Ponphimai S, Chavengkun W, Kompor P, Padchasuwan N, Sawaspol S, Phandee MC, Phandee W, Phanurak W, Kaewpitoon N	Asian Pacific Journal of Cancer Prevention	2016	17	5	2565	2571	community	Cross-sectional study	Jun	Mar	2015	2016	Nakhon Ratchasima	Chum Phuang	Non Rang		ADM3	15.2519	102.823	google map	Kato-Katz	≤40	≥61	21	0	0
292	Thailand	Overweight Relation to Liver Fluke Infection among Rural Participants from 4 Districts of Nakhon Ratchasima Province, Thailand	Kaewpitoon SJ, Rujirakul R, Wakkuwattapong P, Matrakool L, Tongtawee T, Panpimanmas S, Kujapun J, Norkaew J, Photipim M, Ponphimai S, Chavengkun W, Kompor P, Padchasuwan N, Sawaspol S, Phandee MC, Phandee W, Phanurak W, Kaewpitoon N	Asian Pacific Journal of Cancer Prevention	2016	17	5	2565	2571	community	Cross-sectional study	Jun	Mar	2015	2016	Nakhon Ratchasima	Mueang Yang district	Mueang Yang subdistrict		ADM3	15.4207	102.886	google map	Kato-Katz	≤40	≥61	33	1	3.03
293	Thailand	Overweight Relation to Liver Fluke Infection among Rural Participants from 4 Districts of Nakhon Ratchasima Province, Thailand	Kaewpitoon SJ, Rujirakul R, Wakkuwattapong P, Matrakool L, Tongtawee T, Panpimanmas S, Kujapun J, Norkaew J, Photipim M, Ponphimai S, Chavengkun W, Kompor P, Padchasuwan N, Sawaspol S, Phandee MC, Phandee W, Phanurak W, Kaewpitoon N	Asian Pacific Journal of Cancer Prevention	2016	17	5	2565	2571	community	Cross-sectional study	Jun	Mar	2015	2016	Nakhon Ratchasima	Mueang Yang	Lahan Pla Khao		ADM3	15.4871	102.888	google map	Kato-Katz	≤40	≥61	24	1	4.17
294	Thailand	Overweight Relation to Liver Fluke Infection among Rural Participants from 4 Districts of Nakhon Ratchasima Province, Thailand	Kaewpitoon SJ, Rujirakul R, Wakkuwattapong P, Matrakool L, Tongtawee T, Panpimanmas S, Kujapun J, Norkaew J, Photipim M, Ponphimai S, Chavengkun W, Kompor P, Padchasuwan N, Sawaspol S, Phandee MC, Phandee W, Phanurak W, Kaewpitoon N	Asian Pacific Journal of Cancer Prevention	2016	17	5	2565	2571	community	Cross-sectional study	Jun	Mar	2015	2016	Nakhon Ratchasima	Mueang Yang district	Krabueang Nok		ADM3	15.4414	102.96	google map	Kato-Katz	≤40	≥61	5	0	0
295	Thailand	Prevalence and Risk Factors for Infection by Opisthorchis viverrini in an Urban Area of Mahasarakham Province, Northeast Thailand	Chaiputcha K, Promthet S, Bradshaw P	Asian Pacific Journal of Cancer Prevention	2015	16	10	4173	4176	community	Cross-sectional study	Jan	Apr	2014	2014	Mahasarakham	Chiang Yuen district	subdistrict Chiang Yuen municipality		ADM3	16.4332	103.101	google map	Kato-Katz	15	≥60	216	38	17.6			73	31	42.5	143	7	4.9
296	Thailand	Prevalence of helminthic infections and risk factors in villagers of Nanglae Sub-District, Chiang Rai Province, Thailand	Ruankham W, Bunchu N, Koychusakun P	Journal of the Medical Association of Thailand	2014	97	4	4529	4535	community	Cross-sectional study	Jan	Mar	2013	2013	Chiang Rai	Mueang	Nanglae		ADM3	19.9751	99.8098	google map	Kato-Katz			263		0.4
297	Thailand	Prevalence of OV infection in Yasothon Province, Northeast Thailand	Saengsawang P, Promthet S, Bradshaw P	Asian Pacific Journal of Cancer Prevention	2012	13	7	3399	3402	community	Cross-sectional study	Jan	Mar	2012	2012	Yasothon Province	Maha Chana Chai, Kham Khuean Kaeo	Hua Mueang, Kut Kung		ADM3	15.5652	104.204	google map	Kato-Katz	20	65	1569		38.68			739		40.05	830		37.47
298	Thailand	Prevalence of strongyloides in Northern Thailand and treatment with ivermectin vs albendazole	Nontasut P, Muennoo C, Sa-nguankiat S, Fongsri S, Vichit AAdulsak Vichit	The Southeast Asian Journal of Tropical Medicine and Public Health	2005	36	2	442	444	community	Baseline of a randomized clinical trial	Apr	Sep	2004	2004	Chiang Mai	Sun Pa Tong	Tambon Makham Luang		ADM3	18.5781	98.9057	google map	Kato-Katz			697	31	4.4
299	Thailand	Re-examination of Opisthorchis viverrini Infection in Northeast Thailand	Yeoh KW, Promthet S, Sithithaworn P, Kamsa-Ard S, Parkin DM	Asian Pacific Journal of Cancer Prevention	2015	16	8	3413	3418	community	Cohort study			2006	2006	Khon Kaen	Chonnabot district	Wang Sang sub-district		ADM3	16.0117	102.483	google map	FECT	35	68	454		9.3
300	Thailand	The prevalence of intestinal helminth infection in rural subdistricts of northeastern Thailand	Kaewpitoon SJ, Ponphimai S, Pechdee P, Thueng-in K, Khiaowichit J, Meererksom T, Wakhuwatapong P, Bukkhunthod P, Leng M, Namhong T, Taweepakdeechot A, Yardcharoen N, Srithongklang W, Keeratibharat N, Chansangrat J, Kaewpitoon N	Tropical Biomedicine	2019	36	1	152	164	community	Cross-sectional study	Mar	Jul	2018	2018	Khon Kaen province	Waeng Noi district	Lahan Na (16 villages) and Kan Lueang (14 villages) subdistricts		ADM3	15.8099	102.412	paper	Others (Mini Parasep SF)			400	1	0.25
301	Thailand	Thiamine deficiency and parasitic infection in rural Thai children	Khampitak T, Knowles J, Yongvanit P, Sithithaworn P, Tangrassameeprasert R, Boonsiri P, Satarug S	The Southeast Asian Journal of Tropical Medicine and Public Health	2006	37	3	441	445	school-based	Cross-sectional study	_x0000__x0000__x0000__x0000__x0000__x0000__x0000__x0000__x0000__x0000_	_x0000__x0000__x0000__x0000__x0000__x0000__x0000__x0000__x0000__x0000__x0000_			Khon Kaen Province	Nam Phong District	Na Kham Noi		ADM3	16.6081	102.925	google map	FECT	6	12	212	12	5.6			109	7	6.4	107	5	4.7
302	Cambodia	Field survey focused on Opisthorchis viverrini infection in five provinces of Cambodia	Miyamoto K, Kirinoki M, Matsuda H, Hayashi N, Chigusa Y, Sinuon M, Chuor CM, Kitikoon V	Parasitology International	2014	63	2	366	373	community	Cross-sectional study	Nov	Dec	2006	2007	Takeo	Angkor Borei	_x0000__x0000__x0000__x0000__x0000__x0000__x0000__x0000__x0000__x0000__x0000__x0000__x0000__x0000__x0000__x0000__x0000__x0000__x0000__x0000__x0000__x0000__x0000__x0000__x0000__x0000__x0000__x0000__x0000__x0000__x0000__x0000__x0000__x0000__x0000__x0000__x0000__x0000__x0000__x0000__x0000__x0000__x0000__x0000__x0000__x0000__x0000__x0000__x0000__x0000__x0000__x0000__x0000__x0000__x0000__x0000__x0000_…		ADM2	10.9933	104.95	google map	Kato-Katz	6			0	0
303	Cambodia	Field survey focused on Opisthorchis viverrini infection in five provinces of Cambodia	Miyamoto K, Kirinoki M, Matsuda H, Hayashi N, Chigusa Y, Sinuon M, Chuor CM, Kitikoon V	Parasitology International	2014	63	2	366	373	community	Cross-sectional study	Mar	Mar	2006	2006	Takeo	Prey Kabas	_x0000__x0000__x0000__x0000__x0000__x0000__x0000__x0000__x0000__x0000__x0000__x0000__x0000__x0000__x0000__x0000__x0000__x0000__x0000__x0000__x0000__x0000__x0000__x0000__x0000__x0000__x0000__x0000__x0000__x0000__x0000__x0000__x0000__x0000__x0000__x0000__x0000__x0000__x0000__x0000__x0000__x0000__x0000__x0000__x0000__x0000__x0000__x0000__x0000__x0000__x0000__x0000__x0000__x0000__x0000__x0000__x0000_…		ADM2	11.1456	104.93	google map	Kato-Katz	6		807	352	43.62
304	Cambodia	Field survey focused on Opisthorchis viverrini infection in five provinces of Cambodia	Miyamoto K, Kirinoki M, Matsuda H, Hayashi N, Chigusa Y, Sinuon M, Chuor CM, Kitikoon V	Parasitology International	2014	63	2	366	373	community	Cross-sectional study	Nov	Dec	2006	2007	Takeo	Prey Kabas	_x0000__x0000__x0000__x0000__x0000__x0000__x0000__x0000__x0000__x0000__x0000__x0000__x0000__x0000__x0000__x0000__x0000__x0000__x0000__x0000__x0000__x0000__x0000__x0000__x0000__x0000__x0000__x0000__x0000__x0000__x0000__x0000__x0000__x0000__x0000__x0000__x0000__x0000__x0000__x0000__x0000__x0000__x0000__x0000__x0000__x0000__x0000__x0000__x0000__x0000__x0000__x0000__x0000__x0000__x0000__x0000__x0000_…		ADM2	11.1456	104.93	google map	Kato-Katz	6		10422	21	0.2
305	Cambodia	Field survey focused on Opisthorchis viverrini infection in five provinces of Cambodia	Miyamoto K, Kirinoki M, Matsuda H, Hayashi N, Chigusa Y, Sinuon M, Chuor CM, Kitikoon V	Parasitology International	2014	63	2	366	373	community	Cross-sectional study	Apr	May	2008	2008	Kandal	Preaek Ambel	_x0000__x0000__x0000__x0000__x0000__x0000__x0000__x0000__x0000__x0000__x0000__x0000__x0000__x0000__x0000__x0000__x0000__x0000__x0000__x0000__x0000__x0000__x0000__x0000__x0000__x0000__x0000__x0000__x0000__x0000__x0000__x0000__x0000__x0000__x0000__x0000__x0000__x0000__x0000__x0000__x0000__x0000__x0000__x0000__x0000__x0000__x0000__x0000__x0000__x0000__x0000__x0000__x0000__x0000__x0000__x0000__x0000_…		ADM2	11.208	105.009	google map	Kato-Katz	6		615	11	1.79
306	Cambodia	Field survey focused on Opisthorchis viverrini infection in five provinces of Cambodia	Miyamoto K, Kirinoki M, Matsuda H, Hayashi N, Chigusa Y, Sinuon M, Chuor CM, Kitikoon V	Parasitology International	2014	63	2	366	373	community	Cross-sectional study	Aug	Nov	2010	2010	Prey Veng	Ba Phnom	_x0000__x0000__x0000__x0000__x0000__x0000__x0000__x0000__x0000__x0000__x0000__x0000__x0000__x0000__x0000__x0000__x0000__x0000__x0000__x0000__x0000__x0000__x0000__x0000__x0000__x0000__x0000__x0000__x0000__x0000__x0000__x0000__x0000__x0000__x0000__x0000__x0000__x0000__x0000__x0000__x0000__x0000__x0000__x0000__x0000__x0000__x0000__x0000__x0000__x0000__x0000__x0000__x0000__x0000__x0000__x0000__x0000_…		ADM2	11.2826	105.421	google map	Kato-Katz	6		643	0	0
307	Cambodia	Field survey focused on Opisthorchis viverrini infection in five provinces of Cambodia	Miyamoto K, Kirinoki M, Matsuda H, Hayashi N, Chigusa Y, Sinuon M, Chuor CM, Kitikoon V	Parasitology International	2014	63	2	366	373	community	Cross-sectional study	Jun	Jul	2012	2012	Prey Veng	Ba Phnom	_x0000__x0000__x0000__x0000__x0000__x0000__x0000__x0000__x0000__x0000__x0000__x0000__x0000__x0000__x0000__x0000__x0000__x0000__x0000__x0000__x0000__x0000__x0000__x0000__x0000__x0000__x0000__x0000__x0000__x0000__x0000__x0000__x0000__x0000__x0000__x0000__x0000__x0000__x0000__x0000__x0000__x0000__x0000__x0000__x0000__x0000__x0000__x0000__x0000__x0000__x0000__x0000__x0000__x0000__x0000__x0000__x0000_…		ADM2	11.2826	105.421	google map	Kato-Katz	6		116	0	0
308	Cambodia	Field survey focused on Opisthorchis viverrini infection in five provinces of Cambodia	Miyamoto K, Kirinoki M, Matsuda H, Hayashi N, Chigusa Y, Sinuon M, Chuor CM, Kitikoon V	Parasitology International	2014	63	2	366	373	community	Cross-sectional study	Apr	May	2008	2008	Kandal	S'ang	_x0000__x0000__x0000__x0000__x0000__x0000__x0000__x0000__x0000__x0000__x0000__x0000__x0000__x0000__x0000__x0000__x0000__x0000__x0000__x0000__x0000__x0000__x0000__x0000__x0000__x0000__x0000__x0000__x0000__x0000__x0000__x0000__x0000__x0000__x0000__x0000__x0000__x0000__x0000__x0000__x0000__x0000__x0000__x0000__x0000__x0000__x0000__x0000__x0000__x0000__x0000__x0000__x0000__x0000__x0000__x0000__x0000_…		ADM2	11.3207	105.036	google map	Kato-Katz	6		797	161	20.2
309	Cambodia	Field survey focused on Opisthorchis viverrini infection in five provinces of Cambodia	Miyamoto K, Kirinoki M, Matsuda H, Hayashi N, Chigusa Y, Sinuon M, Chuor CM, Kitikoon V	Parasitology International	2014	63	2	366	373	community	Cross-sectional study	Jun	Jul	2012	2012	Kampong Cham	Srei Santhor	_x0000__x0000__x0000__x0000__x0000__x0000__x0000__x0000__x0000__x0000__x0000__x0000__x0000__x0000__x0000__x0000__x0000__x0000__x0000__x0000__x0000__x0000__x0000__x0000__x0000__x0000__x0000__x0000__x0000__x0000__x0000__x0000__x0000__x0000__x0000__x0000__x0000__x0000__x0000__x0000__x0000__x0000__x0000__x0000__x0000__x0000__x0000__x0000__x0000__x0000__x0000__x0000__x0000__x0000__x0000__x0000__x0000_…		ADM2	11.835	105.166	google map	Kato-Katz	6		427	53	12.41
310	Cambodia	Field survey focused on Opisthorchis viverrini infection in five provinces of Cambodia	Miyamoto K, Kirinoki M, Matsuda H, Hayashi N, Chigusa Y, Sinuon M, Chuor CM, Kitikoon V	Parasitology International	2014	63	2	366	373	community	Cross-sectional study	Aug	Nov	2010	2010	Kampong Cham	Kang Meas	_x0000__x0000__x0000__x0000__x0000__x0000__x0000__x0000__x0000__x0000__x0000__x0000__x0000__x0000__x0000__x0000__x0000__x0000__x0000__x0000__x0000__x0000__x0000__x0000__x0000__x0000__x0000__x0000__x0000__x0000__x0000__x0000__x0000__x0000__x0000__x0000__x0000__x0000__x0000__x0000__x0000__x0000__x0000__x0000__x0000__x0000__x0000__x0000__x0000__x0000__x0000__x0000__x0000__x0000__x0000__x0000__x0000_…		ADM2	11.9374	105.149	google map	Kato-Katz	6		1358	322	23.71
311	Cambodia	Field survey focused on Opisthorchis viverrini infection in five provinces of Cambodia	Miyamoto K, Kirinoki M, Matsuda H, Hayashi N, Chigusa Y, Sinuon M, Chuor CM, Kitikoon V	Parasitology International	2014	63	2	366	373	community	Cross-sectional study	Jun	Jul	2012	2012	Kampong Cham	Kang Meas	_x0000__x0000__x0000__x0000__x0000__x0000__x0000__x0000__x0000__x0000__x0000__x0000__x0000__x0000__x0000__x0000__x0000__x0000__x0000__x0000__x0000__x0000__x0000__x0000__x0000__x0000__x0000__x0000__x0000__x0000__x0000__x0000__x0000__x0000__x0000__x0000__x0000__x0000__x0000__x0000__x0000__x0000__x0000__x0000__x0000__x0000__x0000__x0000__x0000__x0000__x0000__x0000__x0000__x0000__x0000__x0000__x0000_…		ADM2	11.9374	105.149	google map	Kato-Katz	6		105	22	20.95
312	Cambodia	Field survey focused on Opisthorchis viverrini infection in five provinces of Cambodia	Miyamoto K, Kirinoki M, Matsuda H, Hayashi N, Chigusa Y, Sinuon M, Chuor CM, Kitikoon V	Parasitology International	2014	63	2	366	373	community	Cross-sectional study	Aug	Nov	2010	2010	Kampong Cham	Kampong Cham	_x0000__x0000__x0000__x0000__x0000__x0000__x0000__x0000__x0000__x0000__x0000__x0000__x0000__x0000__x0000__x0000__x0000__x0000__x0000__x0000__x0000__x0000__x0000__x0000__x0000__x0000__x0000__x0000__x0000__x0000__x0000__x0000__x0000__x0000__x0000__x0000__x0000__x0000__x0000__x0000__x0000__x0000__x0000__x0000__x0000__x0000__x0000__x0000__x0000__x0000__x0000__x0000__x0000__x0000__x0000__x0000__x0000_…		ADM2	11.9849	105.442	google map	Kato-Katz	6		349	108	30.95
313	Cambodia	Field survey focused on Opisthorchis viverrini infection in five provinces of Cambodia	Miyamoto K, Kirinoki M, Matsuda H, Hayashi N, Chigusa Y, Sinuon M, Chuor CM, Kitikoon V	Parasitology International	2014	63	2	366	373	community	Cross-sectional study	Jun	Jul	2012	2012	Kampong Cham	Kampong Siem	_x0000__x0000__x0000__x0000__x0000__x0000__x0000__x0000__x0000__x0000__x0000__x0000__x0000__x0000__x0000__x0000__x0000__x0000__x0000__x0000__x0000__x0000__x0000__x0000__x0000__x0000__x0000__x0000__x0000__x0000__x0000__x0000__x0000__x0000__x0000__x0000__x0000__x0000__x0000__x0000__x0000__x0000__x0000__x0000__x0000__x0000__x0000__x0000__x0000__x0000__x0000__x0000__x0000__x0000__x0000__x0000__x0000_…		ADM2	12.0614	105.52	google map	Kato-Katz	6		126	82	65.08
314	Cambodia	Field survey focused on Opisthorchis viverrini infection in five provinces of Cambodia	Miyamoto K, Kirinoki M, Matsuda H, Hayashi N, Chigusa Y, Sinuon M, Chuor CM, Kitikoon V	Parasitology International	2014	63	2	366	373	community	Cross-sectional study	Jun	Jul	2012	2012	Kampong Tham	Baray	_x0000__x0000__x0000__x0000__x0000__x0000__x0000__x0000__x0000__x0000__x0000__x0000__x0000__x0000__x0000__x0000__x0000__x0000__x0000__x0000__x0000__x0000__x0000__x0000__x0000__x0000__x0000__x0000__x0000__x0000__x0000__x0000__x0000__x0000__x0000__x0000__x0000__x0000__x0000__x0000__x0000__x0000__x0000__x0000__x0000__x0000__x0000__x0000__x0000__x0000__x0000__x0000__x0000__x0000__x0000__x0000__x0000_…		ADM2	12.3871	105.104	google map	Kato-Katz	6		183	89	48.63
315	Cambodia	Field survey focused on Opisthorchis viverrini infection in five provinces of Cambodia	Miyamoto K, Kirinoki M, Matsuda H, Hayashi N, Chigusa Y, Sinuon M, Chuor CM, Kitikoon V	Parasitology International	2014	63	2	366	373	community	Cross-sectional study	Jun	Jul	2012	2012	Kampong Tham	Santuk	_x0000__x0000__x0000__x0000__x0000__x0000__x0000__x0000__x0000__x0000__x0000__x0000__x0000__x0000__x0000__x0000__x0000__x0000__x0000__x0000__x0000__x0000__x0000__x0000__x0000__x0000__x0000__x0000__x0000__x0000__x0000__x0000__x0000__x0000__x0000__x0000__x0000__x0000__x0000__x0000__x0000__x0000__x0000__x0000__x0000__x0000__x0000__x0000__x0000__x0000__x0000__x0000__x0000__x0000__x0000__x0000__x0000_…		ADM2	12.6252	105.343	google map	Kato-Katz	6		104	11	10.58
316	Laos	A small-scale survey of intestinal helminthic infections among the residents near Pakse, Laos	Chai JY, Hongvanthong B	The Korean journal of parasitology	1998	36	1	55	58	community	Cross-sectional study	Sep	Oct	1995	1995	Champassak Province	Pakse City	_x0000__x0000__x0000__x0000__x0000__x0000__x0000__x0000__x0000__x0000__x0000__x0000__x0000__x0000__x0000__x0000__x0000__x0000__x0000__x0000__x0000__x0000__x0000__x0000__x0000__x0000__x0000__x0000__x0000__x0000__x0000__x0000__x0000__x0000__x0000__x0000__x0000__x0000__x0000__x0000__x0000__x0000__x0000__x0000__x0000__x0000__x0000__x0000__x0000__x0000__x0000__x0000__x0000__x0000__x0000__x0000__x0000_…		ADM2	15.1314	105.816	google map	Kato-Katz			90	49	54.4
317	Laos	A small-scale survey of intestinal helminthic infections among the residents near Pakse, Laos	Chai JY, Hongvanthong B	The Korean journal of parasitology	1998	36	1	55	58	school-based	Cross-sectional study	Sep	Oct	1995	1995	Champassak Province	Pakse City	_x0000__x0000__x0000__x0000__x0000__x0000__x0000__x0000__x0000__x0000__x0000__x0000__x0000__x0000__x0000__x0000__x0000__x0000__x0000__x0000__x0000__x0000__x0000__x0000__x0000__x0000__x0000__x0000__x0000__x0000__x0000__x0000__x0000__x0000__x0000__x0000__x0000__x0000__x0000__x0000__x0000__x0000__x0000__x0000__x0000__x0000__x0000__x0000__x0000__x0000__x0000__x0000__x0000__x0000__x0000__x0000__x0000_…		ADM2	15.1314	105.816	google map	Kato-Katz			47	11	23.4
318	Laos	Association between helminth infections and diabetes mellitus in adults from the Lao People's Democratic Republic: a cross-sectional study	Htun N, Odermatt P, Paboriboune P, Sayasone S, Vongsakid M, Phimolsarn-Nusith V, Tran XD, Ounnavong PS, Andriama-Hefasoa N, Senvanpan ND, Homsana A, Lianosay B, Xayavong D, Robinson DR, Bounsavath P, Prasayasith PP, Syphan SD, Lu YX, Thilakoun K, Xaiyaphet XS, Vongngakesone PT, Eze IC, Imboden M, Sripa B, Reinharz D, Probst-Hensch N	Infectious Diseases of Poverty	2018	7	1	105	_x0000__x0000__x0000__x0000__x0000__x0000_	community	Cross-sectional study	Mar	Apr	2016	2016	Champasack	Kong district,Pakse city	_x0000__x0000__x0000__x0000__x0000__x0000__x0000__x0000__x0000__x0000__x0000__x0000__x0000__x0000__x0000__x0000__x0000__x0000__x0000__x0000__x0000__x0000__x0000__x0000__x0000__x0000__x0000__x0000__x0000__x0000__x0000__x0000__x0000__x0000__x0000__x0000__x0000__x0000__x0000__x0000__x0000__x0000__x0000__x0000__x0000__x0000__x0000__x0000__x0000__x0000__x0000__x0000__x0000__x0000__x0000__x0000__x0000_…		ADM2	14.1471	105.959	google map	FECT	35	95	391	156	39.9
319	Laos	Association between helminth infections and diabetes mellitus in adults from the Lao People's Democratic Republic: a cross-sectional study	Htun N, Odermatt P, Paboriboune P, Sayasone S, Vongsakid M, Phimolsarn-Nusith V, Tran XD, Ounnavong PS, Andriama-Hefasoa N, Senvanpan ND, Homsana A, Lianosay B, Xayavong D, Robinson DR, Bounsavath P, Prasayasith PP, Syphan SD, Lu YX, Thilakoun K, Xaiyaphet XS, Vongngakesone PT, Eze IC, Imboden M, Sripa B, Reinharz D, Probst-Hensch N	Infectious Diseases of Poverty	2018	7	1	105	_x0000__x0000__x0000__x0000__x0000__x0000_	community	Cross-sectional study	Mar	Apr	2016	2016	Saravane	Saravane city and Saravane district	_x0000__x0000__x0000__x0000__x0000__x0000__x0000__x0000__x0000__x0000__x0000__x0000__x0000__x0000__x0000__x0000__x0000__x0000__x0000__x0000__x0000__x0000__x0000__x0000__x0000__x0000__x0000__x0000__x0000__x0000__x0000__x0000__x0000__x0000__x0000__x0000__x0000__x0000__x0000__x0000__x0000__x0000__x0000__x0000__x0000__x0000__x0000__x0000__x0000__x0000__x0000__x0000__x0000__x0000__x0000__x0000__x0000_…		ADM2	15.7159	106.362	google map	FECT	35	95	396	171	43.1
320	Laos	Association between helminth infections and diabetes mellitus in adults from the Lao People's Democratic Republic: a cross-sectional study	Htun N, Odermatt P, Paboriboune P, Sayasone S, Vongsakid M, Phimolsarn-Nusith V, Tran XD, Ounnavong PS, Andriama-Hefasoa N, Senvanpan ND, Homsana A, Lianosay B, Xayavong D, Robinson DR, Bounsavath P, Prasayasith PP, Syphan SD, Lu YX, Thilakoun K, Xaiyaphet XS, Vongngakesone PT, Eze IC, Imboden M, Sripa B, Reinharz D, Probst-Hensch N	Infectious Diseases of Poverty	2018	7	1	105	_x0000__x0000__x0000__x0000__x0000__x0000_	community	Cross-sectional study	Mar	Apr	2016	2016	Vientiane	the Vientiane capital and Pakgneum district	_x0000__x0000__x0000__x0000__x0000__x0000__x0000__x0000__x0000__x0000__x0000__x0000__x0000__x0000__x0000__x0000__x0000__x0000__x0000__x0000__x0000__x0000__x0000__x0000__x0000__x0000__x0000__x0000__x0000__x0000__x0000__x0000__x0000__x0000__x0000__x0000__x0000__x0000__x0000__x0000__x0000__x0000__x0000__x0000__x0000__x0000__x0000__x0000__x0000__x0000__x0000__x0000__x0000__x0000__x0000__x0000__x0000_…		ADM2	18.1399	102.938	google map	FECT	35	95	378	106	28
321	Laos	Association between helminth infections and diabetes mellitus in adults from the Lao People's Democratic Republic: a cross-sectional study	Htun N, Odermatt P, Paboriboune P, Sayasone S, Vongsakid M, Phimolsarn-Nusith V, Tran XD, Ounnavong PS, Andriama-Hefasoa N, Senvanpan ND, Homsana A, Lianosay B, Xayavong D, Robinson DR, Bounsavath P, Prasayasith PP, Syphan SD, Lu YX, Thilakoun K, Xaiyaphet XS, Vongngakesone PT, Eze IC, Imboden M, Sripa B, Reinharz D, Probst-Hensch N	Infectious Diseases of Poverty	2018	7	1	105	_x0000__x0000__x0000__x0000__x0000__x0000_	community	Cross-sectional study	Mar	Apr	2016	2016	Luang Prabang	LP city,Namback district	_x0000__x0000__x0000__x0000__x0000__x0000__x0000__x0000__x0000__x0000__x0000__x0000__x0000__x0000__x0000__x0000__x0000__x0000__x0000__x0000__x0000__x0000__x0000__x0000__x0000__x0000__x0000__x0000__x0000__x0000__x0000__x0000__x0000__x0000__x0000__x0000__x0000__x0000__x0000__x0000__x0000__x0000__x0000__x0000__x0000__x0000__x0000__x0000__x0000__x0000__x0000__x0000__x0000__x0000__x0000__x0000__x0000_…		ADM2	19.8233	102.155	google map	FECT	35	95	363	33	9.1
322	Laos	Baseline health situation of communities affected by the Nam Theun 2 hydroelectric project in central Lao PDR and indicators for monitoring	Erlanger TE, Sayasone S, Krieger GR, Kaul S, Sananikhom P, Tanner M, Odermatt P, Utzinger J	International Journal of Environmental Health Research	2008	18	3	223	242	community	Cross-sectional study	_x0000__x0000__x0000__x0000__x0000__x0000__x0000__x0000__x0000__x0000_	_x0000__x0000__x0000__x0000__x0000__x0000__x0000__x0000__x0000__x0000__x0000_			_x0000__x0000__x0000__x0000__x0000__x0000__x0000__x0000__x0000__x0000__x0000__x0000__x0000__x0000__x0000__x0000__x0000__x0000__x0000__x0000__x0000__x0000__x0000__x0000__x0000__x0000__x0000__x0000__x0000__x0000_	Nakai, Xe Bang Fai	_x0000__x0000__x0000__x0000__x0000__x0000__x0000__x0000__x0000__x0000__x0000__x0000__x0000__x0000__x0000__x0000__x0000__x0000__x0000__x0000__x0000__x0000__x0000__x0000__x0000__x0000__x0000__x0000__x0000__x0000__x0000__x0000__x0000__x0000__x0000__x0000__x0000__x0000__x0000__x0000__x0000__x0000__x0000__x0000__x0000__x0000__x0000__x0000__x0000__x0000__x0000__x0000__x0000__x0000__x0000__x0000__x0000_…		ADM2	17.8693	105.291	google map	Not stated or missing	15	>60	5107		0.9
323	Laos	Current status of food-borne parasitic zoonoses in Laos	Giboda M, Ditrich O, Scholz T, Viengsay T, Bouaphanh S	The Southeast Asian Journal of Tropical Medicine and Public Health	1991	22 Suppl	_x0000__x0000__x0000__x0000__x0000_	56	61	community	Cross-sectional study	_x0000__x0000__x0000__x0000__x0000__x0000__x0000__x0000__x0000__x0000_	_x0000__x0000__x0000__x0000__x0000__x0000__x0000__x0000__x0000__x0000__x0000_	1989	1989	Vientiane Province	Nam Ngum Dam camps	_x0000__x0000__x0000__x0000__x0000__x0000__x0000__x0000__x0000__x0000__x0000__x0000__x0000__x0000__x0000__x0000__x0000__x0000__x0000__x0000__x0000__x0000__x0000__x0000__x0000__x0000__x0000__x0000__x0000__x0000__x0000__x0000__x0000__x0000__x0000__x0000__x0000__x0000__x0000__x0000__x0000__x0000__x0000__x0000__x0000__x0000__x0000__x0000__x0000__x0000__x0000__x0000__x0000__x0000__x0000__x0000__x0000_…		ADM2	18.5131	102.565	google map	Others (MIFC)	15	15	535	279	52.1
324	Laos	Efficacy and safety of mefloquine, artesunate, mefloquine-artesunate, tribendimidine, and praziquantel in patients with Opisthorchis viverrini: a randomised, exploratory, open-label, phase 2 trial	Soukhathammavong P, Odermatt P, Sayasone S, Vonghachack Y, Vounatsou P, Hatz C, Akkhavong K, Keiser J	The Lancet Infectious Diseases	2011	11	2	110	118	school-based	Baseline of a randomized clinical trial	_x0000__x0000__x0000__x0000__x0000__x0000__x0000__x0000__x0000__x0000_	_x0000__x0000__x0000__x0000__x0000__x0000__x0000__x0000__x0000__x0000__x0000_	2008	2009	Attapeu Province	the Saysetha district	_x0000__x0000__x0000__x0000__x0000__x0000__x0000__x0000__x0000__x0000__x0000__x0000__x0000__x0000__x0000__x0000__x0000__x0000__x0000__x0000__x0000__x0000__x0000__x0000__x0000__x0000__x0000__x0000__x0000__x0000__x0000__x0000__x0000__x0000__x0000__x0000__x0000__x0000__x0000__x0000__x0000__x0000__x0000__x0000__x0000__x0000__x0000__x0000__x0000__x0000__x0000__x0000__x0000__x0000__x0000__x0000__x0000_…		ADM2	14.9061	106.98	google map	Not stated or missing			957		50
325	Laos	Helminth infection in southern Laos: high prevalence and low awareness	Phongluxa K, Xayaseng V, Vonghachack Y, Akkhavong K, van Eeuwijk P, Odermatt P	Parasites & Vectors	2013	6	1	328	_x0000__x0000__x0000__x0000__x0000__x0000_	community	Cross-sectional study	Jan	Feb	2010	2010	Saravane province	Saravane district	_x0000__x0000__x0000__x0000__x0000__x0000__x0000__x0000__x0000__x0000__x0000__x0000__x0000__x0000__x0000__x0000__x0000__x0000__x0000__x0000__x0000__x0000__x0000__x0000__x0000__x0000__x0000__x0000__x0000__x0000__x0000__x0000__x0000__x0000__x0000__x0000__x0000__x0000__x0000__x0000__x0000__x0000__x0000__x0000__x0000__x0000__x0000__x0000__x0000__x0000__x0000__x0000__x0000__x0000__x0000__x0000__x0000_…		ADM2	15.7159	106.362	google map	Kato-Katz	2	81	574	509	88.7			285		91.2	289		86.1
326	Laos	Hyperendemicity of Haplorchis taichui infection among riparian people in Saravane and Champasak province, Lao PDR	Chai JY, Yong TS, Eom KS, Min DY, Jeon HK, Kim TY, Jung BK, Sisabath L, Insisiengmay B, Phommasack B, Rim HJ	The Korean journal of parasitology	2013	51	3	305	311	community	Cross-sectional study	Dec	Jun	2009	2010	Champasak	Pathoumphone	_x0000__x0000__x0000__x0000__x0000__x0000__x0000__x0000__x0000__x0000__x0000__x0000__x0000__x0000__x0000__x0000__x0000__x0000__x0000__x0000__x0000__x0000__x0000__x0000__x0000__x0000__x0000__x0000__x0000__x0000__x0000__x0000__x0000__x0000__x0000__x0000__x0000__x0000__x0000__x0000__x0000__x0000__x0000__x0000__x0000__x0000__x0000__x0000__x0000__x0000__x0000__x0000__x0000__x0000__x0000__x0000__x0000_…		ADM2	14.6849	106.063	google map	Kato-Katz			115	85	73.9
327	Laos	Hyperendemicity of Haplorchis taichui infection among riparian people in Saravane and Champasak province, Lao PDR	Chai JY, Yong TS, Eom KS, Min DY, Jeon HK, Kim TY, Jung BK, Sisabath L, Insisiengmay B, Phommasack B, Rim HJ	The Korean journal of parasitology	2013	51	3	305	311	community	Cross-sectional study	Dec	Jun	2009	2010	Champasak	Champasak	_x0000__x0000__x0000__x0000__x0000__x0000__x0000__x0000__x0000__x0000__x0000__x0000__x0000__x0000__x0000__x0000__x0000__x0000__x0000__x0000__x0000__x0000__x0000__x0000__x0000__x0000__x0000__x0000__x0000__x0000__x0000__x0000__x0000__x0000__x0000__x0000__x0000__x0000__x0000__x0000__x0000__x0000__x0000__x0000__x0000__x0000__x0000__x0000__x0000__x0000__x0000__x0000__x0000__x0000__x0000__x0000__x0000_…		ADM2	14.8571	105.753	google map	Kato-Katz			102	63	61.8
328	Laos	Hyperendemicity of Haplorchis taichui infection among riparian people in Saravane and Champasak province, Lao PDR	Chai JY, Yong TS, Eom KS, Min DY, Jeon HK, Kim TY, Jung BK, Sisabath L, Insisiengmay B, Phommasack B, Rim HJ	The Korean journal of parasitology	2013	51	3	305	311	community	Cross-sectional study	Dec	Jun	2009	2010	Champasak	Paksong	_x0000__x0000__x0000__x0000__x0000__x0000__x0000__x0000__x0000__x0000__x0000__x0000__x0000__x0000__x0000__x0000__x0000__x0000__x0000__x0000__x0000__x0000__x0000__x0000__x0000__x0000__x0000__x0000__x0000__x0000__x0000__x0000__x0000__x0000__x0000__x0000__x0000__x0000__x0000__x0000__x0000__x0000__x0000__x0000__x0000__x0000__x0000__x0000__x0000__x0000__x0000__x0000__x0000__x0000__x0000__x0000__x0000_…		ADM2	15.0986	106.434	google map	Kato-Katz			107	8	7.5
329	Laos	Hyperendemicity of Haplorchis taichui infection among riparian people in Saravane and Champasak province, Lao PDR	Chai JY, Yong TS, Eom KS, Min DY, Jeon HK, Kim TY, Jung BK, Sisabath L, Insisiengmay B, Phommasack B, Rim HJ	The Korean journal of parasitology	2013	51	3	305	311	community	Cross-sectional study	Dec	Jun	2009	2010	Champasak	Phonthong	_x0000__x0000__x0000__x0000__x0000__x0000__x0000__x0000__x0000__x0000__x0000__x0000__x0000__x0000__x0000__x0000__x0000__x0000__x0000__x0000__x0000__x0000__x0000__x0000__x0000__x0000__x0000__x0000__x0000__x0000__x0000__x0000__x0000__x0000__x0000__x0000__x0000__x0000__x0000__x0000__x0000__x0000__x0000__x0000__x0000__x0000__x0000__x0000__x0000__x0000__x0000__x0000__x0000__x0000__x0000__x0000__x0000_…		ADM2	15.1068	105.649	google map	Kato-Katz			139	46	33.1
330	Laos	Hyperendemicity of Haplorchis taichui infection among riparian people in Saravane and Champasak province, Lao PDR	Chai JY, Yong TS, Eom KS, Min DY, Jeon HK, Kim TY, Jung BK, Sisabath L, Insisiengmay B, Phommasack B, Rim HJ	The Korean journal of parasitology	2013	51	3	305	311	community	Cross-sectional study	Dec	Jun	2009	2010	Champasak	Bachiang	_x0000__x0000__x0000__x0000__x0000__x0000__x0000__x0000__x0000__x0000__x0000__x0000__x0000__x0000__x0000__x0000__x0000__x0000__x0000__x0000__x0000__x0000__x0000__x0000__x0000__x0000__x0000__x0000__x0000__x0000__x0000__x0000__x0000__x0000__x0000__x0000__x0000__x0000__x0000__x0000__x0000__x0000__x0000__x0000__x0000__x0000__x0000__x0000__x0000__x0000__x0000__x0000__x0000__x0000__x0000__x0000__x0000_…		ADM2	15.2444	105.967	google map	Kato-Katz			61	28	45.9
331	Laos	Hyperendemicity of Haplorchis taichui infection among riparian people in Saravane and Champasak province, Lao PDR	Chai JY, Yong TS, Eom KS, Min DY, Jeon HK, Kim TY, Jung BK, Sisabath L, Insisiengmay B, Phommasack B, Rim HJ	The Korean journal of parasitology	2013	51	3	305	311	community	Cross-sectional study	Dec	Jun	2009	2010	Champasak	Sanasomboune	_x0000__x0000__x0000__x0000__x0000__x0000__x0000__x0000__x0000__x0000__x0000__x0000__x0000__x0000__x0000__x0000__x0000__x0000__x0000__x0000__x0000__x0000__x0000__x0000__x0000__x0000__x0000__x0000__x0000__x0000__x0000__x0000__x0000__x0000__x0000__x0000__x0000__x0000__x0000__x0000__x0000__x0000__x0000__x0000__x0000__x0000__x0000__x0000__x0000__x0000__x0000__x0000__x0000__x0000__x0000__x0000__x0000_…		ADM2	15.3415	105.738	google map	Kato-Katz			161	87	54
332	Laos	Hyperendemicity of Haplorchis taichui infection among riparian people in Saravane and Champasak province, Lao PDR	Chai JY, Yong TS, Eom KS, Min DY, Jeon HK, Kim TY, Jung BK, Sisabath L, Insisiengmay B, Phommasack B, Rim HJ	The Korean journal of parasitology	2013	51	3	305	311	community	Cross-sectional study	Dec	Jun	2009	2010	Saravane	Lao Ngam	_x0000__x0000__x0000__x0000__x0000__x0000__x0000__x0000__x0000__x0000__x0000__x0000__x0000__x0000__x0000__x0000__x0000__x0000__x0000__x0000__x0000__x0000__x0000__x0000__x0000__x0000__x0000__x0000__x0000__x0000__x0000__x0000__x0000__x0000__x0000__x0000__x0000__x0000__x0000__x0000__x0000__x0000__x0000__x0000__x0000__x0000__x0000__x0000__x0000__x0000__x0000__x0000__x0000__x0000__x0000__x0000__x0000_…		ADM2	15.4775	106.141	google map	Kato-Katz			101	47	46.5
333	Laos	Hyperendemicity of Haplorchis taichui infection among riparian people in Saravane and Champasak province, Lao PDR	Chai JY, Yong TS, Eom KS, Min DY, Jeon HK, Kim TY, Jung BK, Sisabath L, Insisiengmay B, Phommasack B, Rim HJ	The Korean journal of parasitology	2013	51	3	305	311	community	Cross-sectional study	Dec	Jun	2009	2010	Saravane	Kongxedon	_x0000__x0000__x0000__x0000__x0000__x0000__x0000__x0000__x0000__x0000__x0000__x0000__x0000__x0000__x0000__x0000__x0000__x0000__x0000__x0000__x0000__x0000__x0000__x0000__x0000__x0000__x0000__x0000__x0000__x0000__x0000__x0000__x0000__x0000__x0000__x0000__x0000__x0000__x0000__x0000__x0000__x0000__x0000__x0000__x0000__x0000__x0000__x0000__x0000__x0000__x0000__x0000__x0000__x0000__x0000__x0000__x0000_…		ADM2	15.5464	105.771	google map	Kato-Katz			155	90	58.1
334	Laos	Hyperendemicity of Haplorchis taichui infection among riparian people in Saravane and Champasak province, Lao PDR	Chai JY, Yong TS, Eom KS, Min DY, Jeon HK, Kim TY, Jung BK, Sisabath L, Insisiengmay B, Phommasack B, Rim HJ	The Korean journal of parasitology	2013	51	3	305	311	community	Cross-sectional study	Dec	Jun	2009	2010	Saravane	Saravane	_x0000__x0000__x0000__x0000__x0000__x0000__x0000__x0000__x0000__x0000__x0000__x0000__x0000__x0000__x0000__x0000__x0000__x0000__x0000__x0000__x0000__x0000__x0000__x0000__x0000__x0000__x0000__x0000__x0000__x0000__x0000__x0000__x0000__x0000__x0000__x0000__x0000__x0000__x0000__x0000__x0000__x0000__x0000__x0000__x0000__x0000__x0000__x0000__x0000__x0000__x0000__x0000__x0000__x0000__x0000__x0000__x0000_…		ADM2	15.7159	106.362	google map	Kato-Katz			106	83	78.3
335	Laos	Hyperendemicity of Haplorchis taichui infection among riparian people in Saravane and Champasak province, Lao PDR	Chai JY, Yong TS, Eom KS, Min DY, Jeon HK, Kim TY, Jung BK, Sisabath L, Insisiengmay B, Phommasack B, Rim HJ	The Korean journal of parasitology	2013	51	3	305	311	community	Cross-sectional study	Dec	Jun	2009	2010	Saravane	Vapy	_x0000__x0000__x0000__x0000__x0000__x0000__x0000__x0000__x0000__x0000__x0000__x0000__x0000__x0000__x0000__x0000__x0000__x0000__x0000__x0000__x0000__x0000__x0000__x0000__x0000__x0000__x0000__x0000__x0000__x0000__x0000__x0000__x0000__x0000__x0000__x0000__x0000__x0000__x0000__x0000__x0000__x0000__x0000__x0000__x0000__x0000__x0000__x0000__x0000__x0000__x0000__x0000__x0000__x0000__x0000__x0000__x0000_…		ADM2	15.7502	105.955	google map	Kato-Katz			170	144	84.7
336	Laos	Hyperendemicity of Haplorchis taichui infection among riparian people in Saravane and Champasak province, Lao PDR	Chai JY, Yong TS, Eom KS, Min DY, Jeon HK, Kim TY, Jung BK, Sisabath L, Insisiengmay B, Phommasack B, Rim HJ	The Korean journal of parasitology	2013	51	3	305	311	community	Cross-sectional study	Dec	Jun	2009	2010	Saravane	Lakone Pheng	_x0000__x0000__x0000__x0000__x0000__x0000__x0000__x0000__x0000__x0000__x0000__x0000__x0000__x0000__x0000__x0000__x0000__x0000__x0000__x0000__x0000__x0000__x0000__x0000__x0000__x0000__x0000__x0000__x0000__x0000__x0000__x0000__x0000__x0000__x0000__x0000__x0000__x0000__x0000__x0000__x0000__x0000__x0000__x0000__x0000__x0000__x0000__x0000__x0000__x0000__x0000__x0000__x0000__x0000__x0000__x0000__x0000_…		ADM2	15.8334	105.598	google map	Kato-Katz			118	69	58.5
337	Laos	Hyperendemicity of Haplorchis taichui infection among riparian people in Saravane and Champasak province, Lao PDR	Chai JY, Yong TS, Eom KS, Min DY, Jeon HK, Kim TY, Jung BK, Sisabath L, Insisiengmay B, Phommasack B, Rim HJ	The Korean journal of parasitology	2013	51	3	305	311	community	Cross-sectional study	Dec	Jun	2009	2010	Saravane	Toumlane	_x0000__x0000__x0000__x0000__x0000__x0000__x0000__x0000__x0000__x0000__x0000__x0000__x0000__x0000__x0000__x0000__x0000__x0000__x0000__x0000__x0000__x0000__x0000__x0000__x0000__x0000__x0000__x0000__x0000__x0000__x0000__x0000__x0000__x0000__x0000__x0000__x0000__x0000__x0000__x0000__x0000__x0000__x0000__x0000__x0000__x0000__x0000__x0000__x0000__x0000__x0000__x0000__x0000__x0000__x0000__x0000__x0000_…		ADM2	16.0229	106.238	google map	Kato-Katz			125	109	87.2
338	Laos	Improvement of PCR for detection of Opisthorchis viverrini DNA in human stool samples	Duenngai K, Sithithaworn P, Rudrappa UK, Iddya K, Laha T, Stensvold CR, Strandgaard H, Johansen MV	Journal of Clinical Microbiology	2008	46	1	366	368	community	Cross-sectional study	_x0000__x0000__x0000__x0000__x0000__x0000__x0000__x0000__x0000__x0000_	_x0000__x0000__x0000__x0000__x0000__x0000__x0000__x0000__x0000__x0000__x0000_			Vientiane Province	Thoulakhom, Keo Oudom	_x0000__x0000__x0000__x0000__x0000__x0000__x0000__x0000__x0000__x0000__x0000__x0000__x0000__x0000__x0000__x0000__x0000__x0000__x0000__x0000__x0000__x0000__x0000__x0000__x0000__x0000__x0000__x0000__x0000__x0000__x0000__x0000__x0000__x0000__x0000__x0000__x0000__x0000__x0000__x0000__x0000__x0000__x0000__x0000__x0000__x0000__x0000__x0000__x0000__x0000__x0000__x0000__x0000__x0000__x0000__x0000__x0000_…		ADM2	18.3679	102.697	google map	FECT			79		65.8
339	Laos	Intestinal Helminths Recovered from Humans in Xieng Khouang Province, Lao PDR with a Particular Note on Haplorchis pumilio Infection	Chai JY, Sohn WM, Jung BK, Yong TS, Eom KS, Min DY, Insisiengmay B, Insisiengmay S, Phommasack B, Rim HJ	The Korean journal of parasitology	2015	53	4	439	445	community	Cross-sectional study	Jul	Jul	2011	2011	Xieng Khouang Province	Pek	_x0000__x0000__x0000__x0000__x0000__x0000__x0000__x0000__x0000__x0000__x0000__x0000__x0000__x0000__x0000__x0000__x0000__x0000__x0000__x0000__x0000__x0000__x0000__x0000__x0000__x0000__x0000__x0000__x0000__x0000__x0000__x0000__x0000__x0000__x0000__x0000__x0000__x0000__x0000__x0000__x0000__x0000__x0000__x0000__x0000__x0000__x0000__x0000__x0000__x0000__x0000__x0000__x0000__x0000__x0000__x0000__x0000_…		ADM2	19.514	103.273	google map	Kato-Katz	14	90	172	5	2.9
340	Laos	Intestinal Helminths Recovered from Humans in Xieng Khouang Province, Lao PDR with a Particular Note on Haplorchis pumilio Infection	Chai JY, Sohn WM, Jung BK, Yong TS, Eom KS, Min DY, Insisiengmay B, Insisiengmay S, Phommasack B, Rim HJ	The Korean journal of parasitology	2015	53	4	439	445	community	Cross-sectional study	Jul	Jul	2011	2011	Xieng Khouang Province	Nonghet	_x0000__x0000__x0000__x0000__x0000__x0000__x0000__x0000__x0000__x0000__x0000__x0000__x0000__x0000__x0000__x0000__x0000__x0000__x0000__x0000__x0000__x0000__x0000__x0000__x0000__x0000__x0000__x0000__x0000__x0000__x0000__x0000__x0000__x0000__x0000__x0000__x0000__x0000__x0000__x0000__x0000__x0000__x0000__x0000__x0000__x0000__x0000__x0000__x0000__x0000__x0000__x0000__x0000__x0000__x0000__x0000__x0000_…		ADM2	19.5608	103.924	google map	Kato-Katz	14	90	172	6	3.5
341	Laos	Intestinal Helminths Recovered from Humans in Xieng Khouang Province, Lao PDR with a Particular Note on Haplorchis pumilio Infection	Chai JY, Sohn WM, Jung BK, Yong TS, Eom KS, Min DY, Insisiengmay B, Insisiengmay S, Phommasack B, Rim HJ	The Korean journal of parasitology	2015	53	4	439	445	community	Cross-sectional study	Jul	Jul	2011	2011	Xieng Khouang Province	Phoukout	_x0000__x0000__x0000__x0000__x0000__x0000__x0000__x0000__x0000__x0000__x0000__x0000__x0000__x0000__x0000__x0000__x0000__x0000__x0000__x0000__x0000__x0000__x0000__x0000__x0000__x0000__x0000__x0000__x0000__x0000__x0000__x0000__x0000__x0000__x0000__x0000__x0000__x0000__x0000__x0000__x0000__x0000__x0000__x0000__x0000__x0000__x0000__x0000__x0000__x0000__x0000__x0000__x0000__x0000__x0000__x0000__x0000_…		ADM2	19.6259	103.019	google map	Kato-Katz	14	90	108	8	7.4
342	Laos	Intestinal Helminths Recovered from Humans in Xieng Khouang Province, Lao PDR with a Particular Note on Haplorchis pumilio Infection	Chai JY, Sohn WM, Jung BK, Yong TS, Eom KS, Min DY, Insisiengmay B, Insisiengmay S, Phommasack B, Rim HJ	The Korean journal of parasitology	2015	53	4	439	445	community	Cross-sectional study	Jul	Jul	2011	2011	Xieng Khouang Province	Kham	_x0000__x0000__x0000__x0000__x0000__x0000__x0000__x0000__x0000__x0000__x0000__x0000__x0000__x0000__x0000__x0000__x0000__x0000__x0000__x0000__x0000__x0000__x0000__x0000__x0000__x0000__x0000__x0000__x0000__x0000__x0000__x0000__x0000__x0000__x0000__x0000__x0000__x0000__x0000__x0000__x0000__x0000__x0000__x0000__x0000__x0000__x0000__x0000__x0000__x0000__x0000__x0000__x0000__x0000__x0000__x0000__x0000_…		ADM2	19.7589	103.657	google map	Kato-Katz	14	90	191	9	4.7
343	Laos	Predictors of hookworm and Opisthorchis viverrini infection among adolescents in urban Laos: a cross-sectional study	Yoshida I, Horie O, Akkhavong K	Research and Reports in Tropical Medicine	2019	10	_x0000__x0000__x0000__x0000__x0000_	31	41	school-based	Cross-sectional study	Sep	Sep	2013	2013	Vientiane	Sikottabong District	_x0000__x0000__x0000__x0000__x0000__x0000__x0000__x0000__x0000__x0000__x0000__x0000__x0000__x0000__x0000__x0000__x0000__x0000__x0000__x0000__x0000__x0000__x0000__x0000__x0000__x0000__x0000__x0000__x0000__x0000__x0000__x0000__x0000__x0000__x0000__x0000__x0000__x0000__x0000__x0000__x0000__x0000__x0000__x0000__x0000__x0000__x0000__x0000__x0000__x0000__x0000__x0000__x0000__x0000__x0000__x0000__x0000_…		ADM2	17.9701	102.574	google map	Kato-Katz	10	14	178		39
344	Laos	Prevalence and Associated Risk Factors of Intestinal Parasites in Humans and Domestic Animals across Borders of Thailand and Lao Pdr: Focus on Hookworm and Threadworm	Niamnuy N, Kaewthamasorn M, Congpuong K, Phaytanavanh B, Lohsoonthorn V	The Southeast Asian Journal of Tropical Medicine and Public Health	2016	47	5	901	911	community	Cross-sectional study	_x0000__x0000__x0000__x0000__x0000__x0000__x0000__x0000__x0000__x0000_	_x0000__x0000__x0000__x0000__x0000__x0000__x0000__x0000__x0000__x0000__x0000_			Champasak	Phonthong	_x0000__x0000__x0000__x0000__x0000__x0000__x0000__x0000__x0000__x0000__x0000__x0000__x0000__x0000__x0000__x0000__x0000__x0000__x0000__x0000__x0000__x0000__x0000__x0000__x0000__x0000__x0000__x0000__x0000__x0000__x0000__x0000__x0000__x0000__x0000__x0000__x0000__x0000__x0000__x0000__x0000__x0000__x0000__x0000__x0000__x0000__x0000__x0000__x0000__x0000__x0000__x0000__x0000__x0000__x0000__x0000__x0000_…		ADM2	15.1068	105.649	google map	FECT	≤15	≥61	217	13	6
345	Laos	Prevalence and Factors Associated with Opisthorchis viverrini Infection in Khammouane Province, Lao PDR	Saiyachak K, Tongsotsang S, Saenrueang T, Moore MA, Promthet S	Asian Pacific Journal of Cancer Prevention	2016	17	3	1589	1593	community	Cross-sectional study	Jun	Jul	2015	2015	Khammouane	Thakek district	_x0000__x0000__x0000__x0000__x0000__x0000__x0000__x0000__x0000__x0000__x0000__x0000__x0000__x0000__x0000__x0000__x0000__x0000__x0000__x0000__x0000__x0000__x0000__x0000__x0000__x0000__x0000__x0000__x0000__x0000__x0000__x0000__x0000__x0000__x0000__x0000__x0000__x0000__x0000__x0000__x0000__x0000__x0000__x0000__x0000__x0000__x0000__x0000__x0000__x0000__x0000__x0000__x0000__x0000__x0000__x0000__x0000_…		ADM2	17.3967	104.874	google map	Kato-Katz	15	≥35	237	130	54.8			125	89	71.2	112	41	36.6
346	Laos	Prevalence of helminthic infections among inhabitants of Lao PDR	Eom KS, Yong TS, Sohn WM, Chai JY, Min DY, Rim HJ, Jeon HK, Banouvong V, Insisiengmay B, Phommasack B	The Korean journal of parasitology	2014	52	1	51	56	community	Cross-sectional study	Feb	Feb	2010	2010	Champasak	Khong	_x0000__x0000__x0000__x0000__x0000__x0000__x0000__x0000__x0000__x0000__x0000__x0000__x0000__x0000__x0000__x0000__x0000__x0000__x0000__x0000__x0000__x0000__x0000__x0000__x0000__x0000__x0000__x0000__x0000__x0000__x0000__x0000__x0000__x0000__x0000__x0000__x0000__x0000__x0000__x0000__x0000__x0000__x0000__x0000__x0000__x0000__x0000__x0000__x0000__x0000__x0000__x0000__x0000__x0000__x0000__x0000__x0000_…		ADM2	14.1471	105.959	google map	Combined (Kato-Katz & Stoll's)			282	240	85.1			114	96		168	144
347	Laos	Prevalence of helminthic infections among inhabitants of Lao PDR	Eom KS, Yong TS, Sohn WM, Chai JY, Min DY, Rim HJ, Jeon HK, Banouvong V, Insisiengmay B, Phommasack B	The Korean journal of parasitology	2014	52	1	51	56	community	Cross-sectional study	Jan	Jan	2010	2010	Champassak	Pakse	_x0000__x0000__x0000__x0000__x0000__x0000__x0000__x0000__x0000__x0000__x0000__x0000__x0000__x0000__x0000__x0000__x0000__x0000__x0000__x0000__x0000__x0000__x0000__x0000__x0000__x0000__x0000__x0000__x0000__x0000__x0000__x0000__x0000__x0000__x0000__x0000__x0000__x0000__x0000__x0000__x0000__x0000__x0000__x0000__x0000__x0000__x0000__x0000__x0000__x0000__x0000__x0000__x0000__x0000__x0000__x0000__x0000_…		ADM2	15.1314	105.816	google map	Combined (Kato-Katz & Stoll's)			669	326	48.7			269	146		400	180
348	Laos	Prevalence of helminthic infections among inhabitants of Lao PDR	Eom KS, Yong TS, Sohn WM, Chai JY, Min DY, Rim HJ, Jeon HK, Banouvong V, Insisiengmay B, Phommasack B	The Korean journal of parasitology	2014	52	1	51	56	community	Cross-sectional study	Feb	Feb	2010	2010	Vientiane	Nam Ngum	_x0000__x0000__x0000__x0000__x0000__x0000__x0000__x0000__x0000__x0000__x0000__x0000__x0000__x0000__x0000__x0000__x0000__x0000__x0000__x0000__x0000__x0000__x0000__x0000__x0000__x0000__x0000__x0000__x0000__x0000__x0000__x0000__x0000__x0000__x0000__x0000__x0000__x0000__x0000__x0000__x0000__x0000__x0000__x0000__x0000__x0000__x0000__x0000__x0000__x0000__x0000__x0000__x0000__x0000__x0000__x0000__x0000_…		ADM2	18.5131	102.565	google map	Combined (Kato-Katz & Stoll's)			144	99	68.8			67	45		77	54
349	Laos	Subtle to severe hepatobiliary morbidity in Opisthorchis viverrini endemic settings in southern Laos	Aye SP, Rajpho V, Phongluxa K, Vonghachack Y, Hattendorf J, Hongvanthong B, Rasaphon O, Sripa B, Akkhavong K, Hatz C, Odermatt P	Acta Tropica	2015	141	Pt B	303	309	community	Cross-sectional study	Jan	Apr	2011	2011	Saravan	Saravan	_x0000__x0000__x0000__x0000__x0000__x0000__x0000__x0000__x0000__x0000__x0000__x0000__x0000__x0000__x0000__x0000__x0000__x0000__x0000__x0000__x0000__x0000__x0000__x0000__x0000__x0000__x0000__x0000__x0000__x0000__x0000__x0000__x0000__x0000__x0000__x0000__x0000__x0000__x0000__x0000__x0000__x0000__x0000__x0000__x0000__x0000__x0000__x0000__x0000__x0000__x0000__x0000__x0000__x0000__x0000__x0000__x0000_…		ADM2	15.7159	106.362	google map	Kato-Katz	20	≥50	840	714	85
350	Laos	Ultrasonographic investigation of cholangiocarcinoma in Lao PDR	Kim JY, Yong TS, Rim HJ, Chai JY, Min DY, Eom KS, Sohn WM, Lim JH, Choi D, Insisiengmay S, Phommasack B, Insisiengmay B.	Acta Tropica	2018	182	_x0000__x0000__x0000__x0000__x0000_	128	134	community	Cross-sectional study	Dec	Dec	2010	2010	Vientiane Province	Nam Ngum Dam	_x0000__x0000__x0000__x0000__x0000__x0000__x0000__x0000__x0000__x0000__x0000__x0000__x0000__x0000__x0000__x0000__x0000__x0000__x0000__x0000__x0000__x0000__x0000__x0000__x0000__x0000__x0000__x0000__x0000__x0000__x0000__x0000__x0000__x0000__x0000__x0000__x0000__x0000__x0000__x0000__x0000__x0000__x0000__x0000__x0000__x0000__x0000__x0000__x0000__x0000__x0000__x0000__x0000__x0000__x0000__x0000__x0000_…		ADM2	18.5807	102.583	google map	Kato-Katz	<20	>80	144	99	68.8
351	Thailand	A cross-sectional study of intestinal parasitic infections among schoolchildren in Nan Province, Northern Thailand	Waikagul J, Krudsood S, Radomyos P, Radomyos B, Chalemrut K, Jonsuksuntigul P, Kojima S, Looareesuwan S, Thaineau W	The Southeast Asian Journal of Tropical Medicine and Public Health	2002	33	2	218	223	school-based	Cross-sectional study	Jan	Feb	2001	2001	Nan Province	Bo Klau and Chalerm Prakiet	_x0000__x0000__x0000__x0000__x0000__x0000__x0000__x0000__x0000__x0000__x0000__x0000__x0000__x0000__x0000__x0000__x0000__x0000__x0000__x0000__x0000__x0000__x0000__x0000__x0000__x0000__x0000__x0000__x0000__x0000__x0000__x0000__x0000__x0000__x0000__x0000__x0000__x0000__x0000__x0000__x0000__x0000__x0000__x0000__x0000__x0000__x0000__x0000__x0000__x0000__x0000__x0000__x0000__x0000__x0000__x0000__x0000_…		ADM2	19.0928	101.199	google map	FECT	7	12	1010		1.7
352	Thailand	A cross-sectional study on intestinal parasitic infections in rural communities, northeast Thailand	Boonjaraspinyo S, Boonmars T, Kaewsamut B, Ekobol N, Laummaunwai P, Aukkanimart R, Wonkchalee N, Juasook A, Sriraj P	The Korean journal of parasitology	2013	51	6	727	734	community	Cross-sectional study	Mar	Aug	2013	2013	Khon Kean	by the Shi and Pong Rivers flow	_x0000__x0000__x0000__x0000__x0000__x0000__x0000__x0000__x0000__x0000__x0000__x0000__x0000__x0000__x0000__x0000__x0000__x0000__x0000__x0000__x0000__x0000__x0000__x0000__x0000__x0000__x0000__x0000__x0000__x0000__x0000__x0000__x0000__x0000__x0000__x0000__x0000__x0000__x0000__x0000__x0000__x0000__x0000__x0000__x0000__x0000__x0000__x0000__x0000__x0000__x0000__x0000__x0000__x0000__x0000__x0000__x0000_…		ADM2	16.4339	102.945	google map	FECT	2	80	242	57	22.5			102			140
353	Thailand	A Large Scale Study of the Epidemiology and Risk Factors for the Carcinogenic Liver Fluke Opisthorchis viverrini in Udon Thani Province, Thailand	Prakobwong S, Suwannatrai A, Sancomerang A, Chaipibool S, Siriwechtumrong N	Asian Pacific Journal of Cancer Prevention	2017	18	10	2853	2860	community	Cross-sectional study	Oct	Jul	2016	2017	Udon Thani	Muang - Urban	_x0000__x0000__x0000__x0000__x0000__x0000__x0000__x0000__x0000__x0000__x0000__x0000__x0000__x0000__x0000__x0000__x0000__x0000__x0000__x0000__x0000__x0000__x0000__x0000__x0000__x0000__x0000__x0000__x0000__x0000__x0000__x0000__x0000__x0000__x0000__x0000__x0000__x0000__x0000__x0000__x0000__x0000__x0000__x0000__x0000__x0000__x0000__x0000__x0000__x0000__x0000__x0000__x0000__x0000__x0000__x0000__x0000_…		ADM2	15.4028	100.022	google map	FECT	25	76	4756	1087	22.8
354	Thailand	A Large Scale Study of the Epidemiology and Risk Factors for the Carcinogenic Liver Fluke Opisthorchis viverrini in Udon Thani Province, Thailand	Prakobwong S, Suwannatrai A, Sancomerang A, Chaipibool S, Siriwechtumrong N	Asian Pacific Journal of Cancer Prevention	2017	18	10	2853	2860	community	Cross-sectional study	Oct	Jul	2016	2017	Udon Thani	Muang -Down town	_x0000__x0000__x0000__x0000__x0000__x0000__x0000__x0000__x0000__x0000__x0000__x0000__x0000__x0000__x0000__x0000__x0000__x0000__x0000__x0000__x0000__x0000__x0000__x0000__x0000__x0000__x0000__x0000__x0000__x0000__x0000__x0000__x0000__x0000__x0000__x0000__x0000__x0000__x0000__x0000__x0000__x0000__x0000__x0000__x0000__x0000__x0000__x0000__x0000__x0000__x0000__x0000__x0000__x0000__x0000__x0000__x0000_…		ADM2	15.4028	100.022	google map	FECT	25	76	1106	42	3.8
355	Thailand	A Large Scale Study of the Epidemiology and Risk Factors for the Carcinogenic Liver Fluke Opisthorchis viverrini in Udon Thani Province, Thailand	Prakobwong S, Suwannatrai A, Sancomerang A, Chaipibool S, Siriwechtumrong N	Asian Pacific Journal of Cancer Prevention	2017	18	10	2853	2860	community	Cross-sectional study	Oct	Jul	2016	2017	Udon Thani	Non Sa-ard	_x0000__x0000__x0000__x0000__x0000__x0000__x0000__x0000__x0000__x0000__x0000__x0000__x0000__x0000__x0000__x0000__x0000__x0000__x0000__x0000__x0000__x0000__x0000__x0000__x0000__x0000__x0000__x0000__x0000__x0000__x0000__x0000__x0000__x0000__x0000__x0000__x0000__x0000__x0000__x0000__x0000__x0000__x0000__x0000__x0000__x0000__x0000__x0000__x0000__x0000__x0000__x0000__x0000__x0000__x0000__x0000__x0000_…		ADM2	16.9501	102.899	google map	FECT	25	76	940	140	14.9
356	Thailand	A Large Scale Study of the Epidemiology and Risk Factors for the Carcinogenic Liver Fluke Opisthorchis viverrini in Udon Thani Province, Thailand	Prakobwong S, Suwannatrai A, Sancomerang A, Chaipibool S, Siriwechtumrong N	Asian Pacific Journal of Cancer Prevention	2017	18	10	2853	2860	community	Cross-sectional study	Oct	Jul	2016	2017	Udon Thani	Wang Sam Mor	_x0000__x0000__x0000__x0000__x0000__x0000__x0000__x0000__x0000__x0000__x0000__x0000__x0000__x0000__x0000__x0000__x0000__x0000__x0000__x0000__x0000__x0000__x0000__x0000__x0000__x0000__x0000__x0000__x0000__x0000__x0000__x0000__x0000__x0000__x0000__x0000__x0000__x0000__x0000__x0000__x0000__x0000__x0000__x0000__x0000__x0000__x0000__x0000__x0000__x0000__x0000__x0000__x0000__x0000__x0000__x0000__x0000_…		ADM2	17.0461	103.46	google map	FECT	25	76	109	18	16.5
357	Thailand	A Large Scale Study of the Epidemiology and Risk Factors for the Carcinogenic Liver Fluke Opisthorchis viverrini in Udon Thani Province, Thailand	Prakobwong S, Suwannatrai A, Sancomerang A, Chaipibool S, Siriwechtumrong N	Asian Pacific Journal of Cancer Prevention	2017	18	10	2853	2860	community	Cross-sectional study	Oct	Jul	2016	2017	Udon Thani	Sri Tart	_x0000__x0000__x0000__x0000__x0000__x0000__x0000__x0000__x0000__x0000__x0000__x0000__x0000__x0000__x0000__x0000__x0000__x0000__x0000__x0000__x0000__x0000__x0000__x0000__x0000__x0000__x0000__x0000__x0000__x0000__x0000__x0000__x0000__x0000__x0000__x0000__x0000__x0000__x0000__x0000__x0000__x0000__x0000__x0000__x0000__x0000__x0000__x0000__x0000__x0000__x0000__x0000__x0000__x0000__x0000__x0000__x0000_…		ADM2	17.0728	103.203	google map	FECT	25	76	1584	226	14.2
358	Thailand	A Large Scale Study of the Epidemiology and Risk Factors for the Carcinogenic Liver Fluke Opisthorchis viverrini in Udon Thani Province, Thailand	Prakobwong S, Suwannatrai A, Sancomerang A, Chaipibool S, Siriwechtumrong N	Asian Pacific Journal of Cancer Prevention	2017	18	10	2853	2860	community	Cross-sectional study	Oct	Jul	2016	2017	Udon Thani	Khum Phavapi	_x0000__x0000__x0000__x0000__x0000__x0000__x0000__x0000__x0000__x0000__x0000__x0000__x0000__x0000__x0000__x0000__x0000__x0000__x0000__x0000__x0000__x0000__x0000__x0000__x0000__x0000__x0000__x0000__x0000__x0000__x0000__x0000__x0000__x0000__x0000__x0000__x0000__x0000__x0000__x0000__x0000__x0000__x0000__x0000__x0000__x0000__x0000__x0000__x0000__x0000__x0000__x0000__x0000__x0000__x0000__x0000__x0000_…		ADM2	17.0925	102.994	google map	FECT	25	76	754	63	8.3
359	Thailand	A Large Scale Study of the Epidemiology and Risk Factors for the Carcinogenic Liver Fluke Opisthorchis viverrini in Udon Thani Province, Thailand	Prakobwong S, Suwannatrai A, Sancomerang A, Chaipibool S, Siriwechtumrong N	Asian Pacific Journal of Cancer Prevention	2017	18	10	2853	2860	community	Cross-sectional study	Oct	Jul	2016	2017	Udon Thani	Ku Kaew	_x0000__x0000__x0000__x0000__x0000__x0000__x0000__x0000__x0000__x0000__x0000__x0000__x0000__x0000__x0000__x0000__x0000__x0000__x0000__x0000__x0000__x0000__x0000__x0000__x0000__x0000__x0000__x0000__x0000__x0000__x0000__x0000__x0000__x0000__x0000__x0000__x0000__x0000__x0000__x0000__x0000__x0000__x0000__x0000__x0000__x0000__x0000__x0000__x0000__x0000__x0000__x0000__x0000__x0000__x0000__x0000__x0000_…		ADM2	17.1625	103.166	google map	FECT	25	76	125	16	12.8
360	Thailand	A Large Scale Study of the Epidemiology and Risk Factors for the Carcinogenic Liver Fluke Opisthorchis viverrini in Udon Thani Province, Thailand	Prakobwong S, Suwannatrai A, Sancomerang A, Chaipibool S, Siriwechtumrong N	Asian Pacific Journal of Cancer Prevention	2017	18	10	2853	2860	community	Cross-sectional study	Oct	Jul	2016	2017	Udon Thani	Nong Wua Sor	_x0000__x0000__x0000__x0000__x0000__x0000__x0000__x0000__x0000__x0000__x0000__x0000__x0000__x0000__x0000__x0000__x0000__x0000__x0000__x0000__x0000__x0000__x0000__x0000__x0000__x0000__x0000__x0000__x0000__x0000__x0000__x0000__x0000__x0000__x0000__x0000__x0000__x0000__x0000__x0000__x0000__x0000__x0000__x0000__x0000__x0000__x0000__x0000__x0000__x0000__x0000__x0000__x0000__x0000__x0000__x0000__x0000_…		ADM2	17.1875	102.589	google map	FECT	25	76	1509	131	8.6
361	Thailand	A Large Scale Study of the Epidemiology and Risk Factors for the Carcinogenic Liver Fluke Opisthorchis viverrini in Udon Thani Province, Thailand	Prakobwong S, Suwannatrai A, Sancomerang A, Chaipibool S, Siriwechtumrong N	Asian Pacific Journal of Cancer Prevention	2017	18	10	2853	2860	community	Cross-sectional study	Oct	Jul	2016	2017	Udon Thani	Nong Han	_x0000__x0000__x0000__x0000__x0000__x0000__x0000__x0000__x0000__x0000__x0000__x0000__x0000__x0000__x0000__x0000__x0000__x0000__x0000__x0000__x0000__x0000__x0000__x0000__x0000__x0000__x0000__x0000__x0000__x0000__x0000__x0000__x0000__x0000__x0000__x0000__x0000__x0000__x0000__x0000__x0000__x0000__x0000__x0000__x0000__x0000__x0000__x0000__x0000__x0000__x0000__x0000__x0000__x0000__x0000__x0000__x0000_…		ADM2	17.3612	103.101	google map	FECT	25	76	906	128	14.1
362	Thailand	A Large Scale Study of the Epidemiology and Risk Factors for the Carcinogenic Liver Fluke Opisthorchis viverrini in Udon Thani Province, Thailand	Prakobwong S, Suwannatrai A, Sancomerang A, Chaipibool S, Siriwechtumrong N	Asian Pacific Journal of Cancer Prevention	2017	18	10	2853	2860	community	Cross-sectional study	Oct	Jul	2016	2017	Udon Thani	Kud Chab	_x0000__x0000__x0000__x0000__x0000__x0000__x0000__x0000__x0000__x0000__x0000__x0000__x0000__x0000__x0000__x0000__x0000__x0000__x0000__x0000__x0000__x0000__x0000__x0000__x0000__x0000__x0000__x0000__x0000__x0000__x0000__x0000__x0000__x0000__x0000__x0000__x0000__x0000__x0000__x0000__x0000__x0000__x0000__x0000__x0000__x0000__x0000__x0000__x0000__x0000__x0000__x0000__x0000__x0000__x0000__x0000__x0000_…		ADM2	17.4407	102.534	google map	FECT	25	76	78	12	15.3
363	Thailand	A Large Scale Study of the Epidemiology and Risk Factors for the Carcinogenic Liver Fluke Opisthorchis viverrini in Udon Thani Province, Thailand	Prakobwong S, Suwannatrai A, Sancomerang A, Chaipibool S, Siriwechtumrong N	Asian Pacific Journal of Cancer Prevention	2017	18	10	2853	2860	community	Cross-sectional study	Oct	Jul	2016	2017	Udon Thani	Tung Fon	_x0000__x0000__x0000__x0000__x0000__x0000__x0000__x0000__x0000__x0000__x0000__x0000__x0000__x0000__x0000__x0000__x0000__x0000__x0000__x0000__x0000__x0000__x0000__x0000__x0000__x0000__x0000__x0000__x0000__x0000__x0000__x0000__x0000__x0000__x0000__x0000__x0000__x0000__x0000__x0000__x0000__x0000__x0000__x0000__x0000__x0000__x0000__x0000__x0000__x0000__x0000__x0000__x0000__x0000__x0000__x0000__x0000_…		ADM2	17.4903	103.221	google map	FECT	25	76	491	62	12.6
364	Thailand	A Large Scale Study of the Epidemiology and Risk Factors for the Carcinogenic Liver Fluke Opisthorchis viverrini in Udon Thani Province, Thailand	Prakobwong S, Suwannatrai A, Sancomerang A, Chaipibool S, Siriwechtumrong N	Asian Pacific Journal of Cancer Prevention	2017	18	10	2853	2860	community	Cross-sectional study	Oct	Jul	2016	2017	Udon Thani	Pi Bun Rak	_x0000__x0000__x0000__x0000__x0000__x0000__x0000__x0000__x0000__x0000__x0000__x0000__x0000__x0000__x0000__x0000__x0000__x0000__x0000__x0000__x0000__x0000__x0000__x0000__x0000__x0000__x0000__x0000__x0000__x0000__x0000__x0000__x0000__x0000__x0000__x0000__x0000__x0000__x0000__x0000__x0000__x0000__x0000__x0000__x0000__x0000__x0000__x0000__x0000__x0000__x0000__x0000__x0000__x0000__x0000__x0000__x0000_…		ADM2	17.5264	103.075	google map	FECT	25	76	632	110	17.4
365	Thailand	A Large Scale Study of the Epidemiology and Risk Factors for the Carcinogenic Liver Fluke Opisthorchis viverrini in Udon Thani Province, Thailand	Prakobwong S, Suwannatrai A, Sancomerang A, Chaipibool S, Siriwechtumrong N	Asian Pacific Journal of Cancer Prevention	2017	18	10	2853	2860	community	Cross-sectional study	Oct	Jul	2016	2017	Udon Thani	Phen	_x0000__x0000__x0000__x0000__x0000__x0000__x0000__x0000__x0000__x0000__x0000__x0000__x0000__x0000__x0000__x0000__x0000__x0000__x0000__x0000__x0000__x0000__x0000__x0000__x0000__x0000__x0000__x0000__x0000__x0000__x0000__x0000__x0000__x0000__x0000__x0000__x0000__x0000__x0000__x0000__x0000__x0000__x0000__x0000__x0000__x0000__x0000__x0000__x0000__x0000__x0000__x0000__x0000__x0000__x0000__x0000__x0000_…		ADM2	17.6607	102.93	google map	FECT	25	76	435	66	15.2
366	Thailand	A Large Scale Study of the Epidemiology and Risk Factors for the Carcinogenic Liver Fluke Opisthorchis viverrini in Udon Thani Province, Thailand	Prakobwong S, Suwannatrai A, Sancomerang A, Chaipibool S, Siriwechtumrong N	Asian Pacific Journal of Cancer Prevention	2017	18	10	2853	2860	community	Cross-sectional study	Oct	Jul	2016	2017	Udon Thani	Ban Puae	_x0000__x0000__x0000__x0000__x0000__x0000__x0000__x0000__x0000__x0000__x0000__x0000__x0000__x0000__x0000__x0000__x0000__x0000__x0000__x0000__x0000__x0000__x0000__x0000__x0000__x0000__x0000__x0000__x0000__x0000__x0000__x0000__x0000__x0000__x0000__x0000__x0000__x0000__x0000__x0000__x0000__x0000__x0000__x0000__x0000__x0000__x0000__x0000__x0000__x0000__x0000__x0000__x0000__x0000__x0000__x0000__x0000_…		ADM2	17.6769	102.446	google map	FECT	25	76	63	4	6.3
367	Thailand	A Large Scale Study of the Epidemiology and Risk Factors for the Carcinogenic Liver Fluke Opisthorchis viverrini in Udon Thani Province, Thailand	Prakobwong S, Suwannatrai A, Sancomerang A, Chaipibool S, Siriwechtumrong N	Asian Pacific Journal of Cancer Prevention	2017	18	10	2853	2860	community	Cross-sectional study	Oct	Jul	2016	2017	Udon Thani	Ban Dung	_x0000__x0000__x0000__x0000__x0000__x0000__x0000__x0000__x0000__x0000__x0000__x0000__x0000__x0000__x0000__x0000__x0000__x0000__x0000__x0000__x0000__x0000__x0000__x0000__x0000__x0000__x0000__x0000__x0000__x0000__x0000__x0000__x0000__x0000__x0000__x0000__x0000__x0000__x0000__x0000__x0000__x0000__x0000__x0000__x0000__x0000__x0000__x0000__x0000__x0000__x0000__x0000__x0000__x0000__x0000__x0000__x0000_…		ADM2	17.7116	103.267	google map	FECT	25	76	345	39	11.3
368	Thailand	A Large Scale Study of the Epidemiology and Risk Factors for the Carcinogenic Liver Fluke Opisthorchis viverrini in Udon Thani Province, Thailand	Prakobwong S, Suwannatrai A, Sancomerang A, Chaipibool S, Siriwechtumrong N	Asian Pacific Journal of Cancer Prevention	2017	18	10	2853	2860	community	Cross-sectional study	Oct	Jul	2016	2017	Udon Thani	Sang Kom	_x0000__x0000__x0000__x0000__x0000__x0000__x0000__x0000__x0000__x0000__x0000__x0000__x0000__x0000__x0000__x0000__x0000__x0000__x0000__x0000__x0000__x0000__x0000__x0000__x0000__x0000__x0000__x0000__x0000__x0000__x0000__x0000__x0000__x0000__x0000__x0000__x0000__x0000__x0000__x0000__x0000__x0000__x0000__x0000__x0000__x0000__x0000__x0000__x0000__x0000__x0000__x0000__x0000__x0000__x0000__x0000__x0000_…		ADM2	17.7886	103.053	google map	FECT	25	76	650	104	16
369	Thailand	A Large Scale Study of the Epidemiology and Risk Factors for the Carcinogenic Liver Fluke Opisthorchis viverrini in Udon Thani Province, Thailand	Prakobwong S, Suwannatrai A, Sancomerang A, Chaipibool S, Siriwechtumrong N	Asian Pacific Journal of Cancer Prevention	2017	18	10	2853	2860	community	Cross-sectional study	Oct	Jul	2016	2017	Udon Thani	Na Yung	_x0000__x0000__x0000__x0000__x0000__x0000__x0000__x0000__x0000__x0000__x0000__x0000__x0000__x0000__x0000__x0000__x0000__x0000__x0000__x0000__x0000__x0000__x0000__x0000__x0000__x0000__x0000__x0000__x0000__x0000__x0000__x0000__x0000__x0000__x0000__x0000__x0000__x0000__x0000__x0000__x0000__x0000__x0000__x0000__x0000__x0000__x0000__x0000__x0000__x0000__x0000__x0000__x0000__x0000__x0000__x0000__x0000_…		ADM2	17.9315	102.135	google map	FECT	25	76	283	17	6
370	Thailand	Analysis of Risk Areas of Opisthorchis viverrini in Rural Communities by Using SUT-OV-001	Kaewpitoon SJ, Sawaspol S, Phandee MC, Phandee W, Phanurak W, Rujirakul R, Wakkuwattapong P, Matrakool L, Tongtawee T, Panpimanmas S, Benjaoran F, Namvichaisirikul N, Jamkoa D, Joosiri A, Kaewpitoon N	Journal of the Medical Association of Thailand	2016	99	7	138	143	community	Cross-sectional study	Oct	Mar	2015	2016	Nakhon Ratchasima province	Kang Sanam Nang district	_x0000__x0000__x0000__x0000__x0000__x0000__x0000__x0000__x0000__x0000__x0000__x0000__x0000__x0000__x0000__x0000__x0000__x0000__x0000__x0000__x0000__x0000__x0000__x0000__x0000__x0000__x0000__x0000__x0000__x0000__x0000__x0000__x0000__x0000__x0000__x0000__x0000__x0000__x0000__x0000__x0000__x0000__x0000__x0000__x0000__x0000__x0000__x0000__x0000__x0000__x0000__x0000__x0000__x0000__x0000__x0000__x0000_…		ADM2	15.7003	102.249	google map	Kato-Katz	40	>70	397		3.02
371	Thailand	Association between Opisthorchis viverrini and Leptospira spp. infection in endemic Northeast Thailand	Van CD, Doungchawee G, Suttiprapa S, Arimatsu Y, Kaewkes S, Sripa B	Parasitology International	2016	_x0000__x0000__x0000__x0000__x0000__x0000__x0000__x0000_	_x0000__x0000__x0000__x0000__x0000_	1	7	community	Cross-sectional study	_x0000__x0000__x0000__x0000__x0000__x0000__x0000__x0000__x0000__x0000_	_x0000__x0000__x0000__x0000__x0000__x0000__x0000__x0000__x0000__x0000__x0000_			Khon Kean	lawa wetland complex	_x0000__x0000__x0000__x0000__x0000__x0000__x0000__x0000__x0000__x0000__x0000__x0000__x0000__x0000__x0000__x0000__x0000__x0000__x0000__x0000__x0000__x0000__x0000__x0000__x0000__x0000__x0000__x0000__x0000__x0000__x0000__x0000__x0000__x0000__x0000__x0000__x0000__x0000__x0000__x0000__x0000__x0000__x0000__x0000__x0000__x0000__x0000__x0000__x0000__x0000__x0000__x0000__x0000__x0000__x0000__x0000__x0000_…		ADM2	16.6948	102.612	google map	Not stated or missing			280	156	55.7			126	77	61.1	154	79	51.3
372	Thailand	Co-infection with Opisthorchis viverrini and Haplorchis taichui detected by human fecal examination in Chomtong district, Chiang Mai Province, Thailand	Wongsawad C, Phalee A, Noikong W, Chuboon S, Nithikathkul C	Parasitology International	2012	61	1	56	59	community	Cross-sectional study	_x0000__x0000__x0000__x0000__x0000__x0000__x0000__x0000__x0000__x0000_	_x0000__x0000__x0000__x0000__x0000__x0000__x0000__x0000__x0000__x0000__x0000_			Chiang Mai	Chomtong District	_x0000__x0000__x0000__x0000__x0000__x0000__x0000__x0000__x0000__x0000__x0000__x0000__x0000__x0000__x0000__x0000__x0000__x0000__x0000__x0000__x0000__x0000__x0000__x0000__x0000__x0000__x0000__x0000__x0000__x0000__x0000__x0000__x0000__x0000__x0000__x0000__x0000__x0000__x0000__x0000__x0000__x0000__x0000__x0000__x0000__x0000__x0000__x0000__x0000__x0000__x0000__x0000__x0000__x0000__x0000__x0000__x0000_…		ADM2	18.3731	98.6068	google map	FECT			316		6.54
373	Thailand	Co-infection with Opisthorchis viverrini and Haplorchis taichui detected by human fecal examination in Chomtong district, Chiang Mai Province, Thailand	Wongsawad C, Phalee A, Noikong W, Chuboon S, Nithikathkul C	Parasitology International	2012	61	1	56	59	community	Cross-sectional study	_x0000__x0000__x0000__x0000__x0000__x0000__x0000__x0000__x0000__x0000_	_x0000__x0000__x0000__x0000__x0000__x0000__x0000__x0000__x0000__x0000__x0000_			Chiang Mai	Chomtong District	_x0000__x0000__x0000__x0000__x0000__x0000__x0000__x0000__x0000__x0000__x0000__x0000__x0000__x0000__x0000__x0000__x0000__x0000__x0000__x0000__x0000__x0000__x0000__x0000__x0000__x0000__x0000__x0000__x0000__x0000__x0000__x0000__x0000__x0000__x0000__x0000__x0000__x0000__x0000__x0000__x0000__x0000__x0000__x0000__x0000__x0000__x0000__x0000__x0000__x0000__x0000__x0000__x0000__x0000__x0000__x0000__x0000_…		ADM2	18.3731	98.6068	google map	FECT			316		0
374	Thailand	Co-infection with Opisthorchis viverrini and Haplorchis taichui detected by human fecal examination in Chomtong district, Chiang Mai Province, Thailand	Wongsawad C, Phalee A, Noikong W, Chuboon S, Nithikathkul C	Parasitology International	2012	61	1	56	59	community	Cross-sectional study	_x0000__x0000__x0000__x0000__x0000__x0000__x0000__x0000__x0000__x0000_	_x0000__x0000__x0000__x0000__x0000__x0000__x0000__x0000__x0000__x0000__x0000_			Chiang Mai	Chomtong District	_x0000__x0000__x0000__x0000__x0000__x0000__x0000__x0000__x0000__x0000__x0000__x0000__x0000__x0000__x0000__x0000__x0000__x0000__x0000__x0000__x0000__x0000__x0000__x0000__x0000__x0000__x0000__x0000__x0000__x0000__x0000__x0000__x0000__x0000__x0000__x0000__x0000__x0000__x0000__x0000__x0000__x0000__x0000__x0000__x0000__x0000__x0000__x0000__x0000__x0000__x0000__x0000__x0000__x0000__x0000__x0000__x0000_…		ADM2	18.3731	98.6068	google map	FECT			316		0
375	Thailand	Community-based cross-sectional study of carcinogenic human liver fluke in elderly from Surin province, Thailand	Kaewpitoon SJ, Rujirakul R, Ueng-Arporn N, Matrakool L, Namwichaisiriku N, Churproong S, Wongkaewpothong P, Nimkuntod P, Sripa B, Kaewpitoon N	Asian Pacific Journal of Cancer Prevention	2012	13	9	4285	4288	community	Cross-sectional study	Jan	Mar	2011	2011	Surin	Phanom Dong Rak	_x0000__x0000__x0000__x0000__x0000__x0000__x0000__x0000__x0000__x0000__x0000__x0000__x0000__x0000__x0000__x0000__x0000__x0000__x0000__x0000__x0000__x0000__x0000__x0000__x0000__x0000__x0000__x0000__x0000__x0000__x0000__x0000__x0000__x0000__x0000__x0000__x0000__x0000__x0000__x0000__x0000__x0000__x0000__x0000__x0000__x0000__x0000__x0000__x0000__x0000__x0000__x0000__x0000__x0000__x0000__x0000__x0000_…		ADM2	14.4276	103.311	google map	Kato-Katz	60	>90	16	1	6.25
376	Thailand	Community-based cross-sectional study of carcinogenic human liver fluke in elderly from Surin province, Thailand	Kaewpitoon SJ, Rujirakul R, Ueng-Arporn N, Matrakool L, Namwichaisiriku N, Churproong S, Wongkaewpothong P, Nimkuntod P, Sripa B, Kaewpitoon N	Asian Pacific Journal of Cancer Prevention	2012	13	9	4285	4288	community	Cross-sectional study	Jan	Dec	2011	2011	Surin	Kap Choeng	_x0000__x0000__x0000__x0000__x0000__x0000__x0000__x0000__x0000__x0000__x0000__x0000__x0000__x0000__x0000__x0000__x0000__x0000__x0000__x0000__x0000__x0000__x0000__x0000__x0000__x0000__x0000__x0000__x0000__x0000__x0000__x0000__x0000__x0000__x0000__x0000__x0000__x0000__x0000__x0000__x0000__x0000__x0000__x0000__x0000__x0000__x0000__x0000__x0000__x0000__x0000__x0000__x0000__x0000__x0000__x0000__x0000_…		ADM2	14.4682	103.58	google map	Kato-Katz	60	>90	21	0	0
377	Thailand	Community-based cross-sectional study of carcinogenic human liver fluke in elderly from Surin province, Thailand	Kaewpitoon SJ, Rujirakul R, Ueng-Arporn N, Matrakool L, Namwichaisiriku N, Churproong S, Wongkaewpothong P, Nimkuntod P, Sripa B, Kaewpitoon N	Asian Pacific Journal of Cancer Prevention	2012	13	9	4285	4288	community	Cross-sectional study	Jan	Dec	2011	2011	Surin	Buachet	_x0000__x0000__x0000__x0000__x0000__x0000__x0000__x0000__x0000__x0000__x0000__x0000__x0000__x0000__x0000__x0000__x0000__x0000__x0000__x0000__x0000__x0000__x0000__x0000__x0000__x0000__x0000__x0000__x0000__x0000__x0000__x0000__x0000__x0000__x0000__x0000__x0000__x0000__x0000__x0000__x0000__x0000__x0000__x0000__x0000__x0000__x0000__x0000__x0000__x0000__x0000__x0000__x0000__x0000__x0000__x0000__x0000_…		ADM2	14.4778	103.98	google map	Kato-Katz	60	>90	19	4	21.05
378	Thailand	Community-based cross-sectional study of carcinogenic human liver fluke in elderly from Surin province, Thailand	Kaewpitoon SJ, Rujirakul R, Ueng-Arporn N, Matrakool L, Namwichaisiriku N, Churproong S, Wongkaewpothong P, Nimkuntod P, Sripa B, Kaewpitoon N	Asian Pacific Journal of Cancer Prevention	2012	13	9	4285	4288	community	Cross-sectional study	Jan	Dec	2011	2011	Surin	Sangkha	_x0000__x0000__x0000__x0000__x0000__x0000__x0000__x0000__x0000__x0000__x0000__x0000__x0000__x0000__x0000__x0000__x0000__x0000__x0000__x0000__x0000__x0000__x0000__x0000__x0000__x0000__x0000__x0000__x0000__x0000__x0000__x0000__x0000__x0000__x0000__x0000__x0000__x0000__x0000__x0000__x0000__x0000__x0000__x0000__x0000__x0000__x0000__x0000__x0000__x0000__x0000__x0000__x0000__x0000__x0000__x0000__x0000_…		ADM2	14.572	103.838	google map	Kato-Katz	60	>90	25	6	24
379	Thailand	Community-based cross-sectional study of carcinogenic human liver fluke in elderly from Surin province, Thailand	Kaewpitoon SJ, Rujirakul R, Ueng-Arporn N, Matrakool L, Namwichaisiriku N, Churproong S, Wongkaewpothong P, Nimkuntod P, Sripa B, Kaewpitoon N	Asian Pacific Journal of Cancer Prevention	2012	13	9	4285	4288	community	Cross-sectional study	Jan	Dec	2011	2011	Surin	Prasat	_x0000__x0000__x0000__x0000__x0000__x0000__x0000__x0000__x0000__x0000__x0000__x0000__x0000__x0000__x0000__x0000__x0000__x0000__x0000__x0000__x0000__x0000__x0000__x0000__x0000__x0000__x0000__x0000__x0000__x0000__x0000__x0000__x0000__x0000__x0000__x0000__x0000__x0000__x0000__x0000__x0000__x0000__x0000__x0000__x0000__x0000__x0000__x0000__x0000__x0000__x0000__x0000__x0000__x0000__x0000__x0000__x0000_…		ADM2	14.6279	103.415	google map	Kato-Katz	60	>90	23	0	0
380	Thailand	Community-based cross-sectional study of carcinogenic human liver fluke in elderly from Surin province, Thailand	Kaewpitoon SJ, Rujirakul R, Ueng-Arporn N, Matrakool L, Namwichaisiriku N, Churproong S, Wongkaewpothong P, Nimkuntod P, Sripa B, Kaewpitoon N	Asian Pacific Journal of Cancer Prevention	2012	13	9	4285	4288	community	Cross-sectional study	Jan	Dec	2011	2011	Surin	Lamduan	_x0000__x0000__x0000__x0000__x0000__x0000__x0000__x0000__x0000__x0000__x0000__x0000__x0000__x0000__x0000__x0000__x0000__x0000__x0000__x0000__x0000__x0000__x0000__x0000__x0000__x0000__x0000__x0000__x0000__x0000__x0000__x0000__x0000__x0000__x0000__x0000__x0000__x0000__x0000__x0000__x0000__x0000__x0000__x0000__x0000__x0000__x0000__x0000__x0000__x0000__x0000__x0000__x0000__x0000__x0000__x0000__x0000_…		ADM2	14.7151	103.694	google map	Kato-Katz	60	>90	23	1	4.35
381	Thailand	Community-based cross-sectional study of carcinogenic human liver fluke in elderly from Surin province, Thailand	Kaewpitoon SJ, Rujirakul R, Ueng-Arporn N, Matrakool L, Namwichaisiriku N, Churproong S, Wongkaewpothong P, Nimkuntod P, Sripa B, Kaewpitoon N	Asian Pacific Journal of Cancer Prevention	2012	13	9	4285	4288	community	Cross-sectional study	Jan	Dec	2011	2011	Surin	Si Narong	_x0000__x0000__x0000__x0000__x0000__x0000__x0000__x0000__x0000__x0000__x0000__x0000__x0000__x0000__x0000__x0000__x0000__x0000__x0000__x0000__x0000__x0000__x0000__x0000__x0000__x0000__x0000__x0000__x0000__x0000__x0000__x0000__x0000__x0000__x0000__x0000__x0000__x0000__x0000__x0000__x0000__x0000__x0000__x0000__x0000__x0000__x0000__x0000__x0000__x0000__x0000__x0000__x0000__x0000__x0000__x0000__x0000_…		ADM2	14.7795	103.885	google map	Kato-Katz	60	>90	20	3	15
382	Thailand	Community-based cross-sectional study of carcinogenic human liver fluke in elderly from Surin province, Thailand	Kaewpitoon SJ, Rujirakul R, Ueng-Arporn N, Matrakool L, Namwichaisiriku N, Churproong S, Wongkaewpothong P, Nimkuntod P, Sripa B, Kaewpitoon N	Asian Pacific Journal of Cancer Prevention	2012	13	9	4285	4288	community	Cross-sectional study	Jan	Feb	2011	2011	Surin	Mueang Surin	_x0000__x0000__x0000__x0000__x0000__x0000__x0000__x0000__x0000__x0000__x0000__x0000__x0000__x0000__x0000__x0000__x0000__x0000__x0000__x0000__x0000__x0000__x0000__x0000__x0000__x0000__x0000__x0000__x0000__x0000__x0000__x0000__x0000__x0000__x0000__x0000__x0000__x0000__x0000__x0000__x0000__x0000__x0000__x0000__x0000__x0000__x0000__x0000__x0000__x0000__x0000__x0000__x0000__x0000__x0000__x0000__x0000_…		ADM2	14.8837	103.513	google map	Kato-Katz	60	>90	12	1	8.33
383	Thailand	Community-based cross-sectional study of carcinogenic human liver fluke in elderly from Surin province, Thailand	Kaewpitoon SJ, Rujirakul R, Ueng-Arporn N, Matrakool L, Namwichaisiriku N, Churproong S, Wongkaewpothong P, Nimkuntod P, Sripa B, Kaewpitoon N	Asian Pacific Journal of Cancer Prevention	2012	13	9	4285	4288	community	Cross-sectional study	Jan	Dec	2011	2011	Surin	Sikhoraphum	_x0000__x0000__x0000__x0000__x0000__x0000__x0000__x0000__x0000__x0000__x0000__x0000__x0000__x0000__x0000__x0000__x0000__x0000__x0000__x0000__x0000__x0000__x0000__x0000__x0000__x0000__x0000__x0000__x0000__x0000__x0000__x0000__x0000__x0000__x0000__x0000__x0000__x0000__x0000__x0000__x0000__x0000__x0000__x0000__x0000__x0000__x0000__x0000__x0000__x0000__x0000__x0000__x0000__x0000__x0000__x0000__x0000_…		ADM2	14.9479	103.783	google map	Kato-Katz	60	>90	18	0	0
384	Thailand	Community-based cross-sectional study of carcinogenic human liver fluke in elderly from Surin province, Thailand	Kaewpitoon SJ, Rujirakul R, Ueng-Arporn N, Matrakool L, Namwichaisiriku N, Churproong S, Wongkaewpothong P, Nimkuntod P, Sripa B, Kaewpitoon N	Asian Pacific Journal of Cancer Prevention	2012	13	9	4285	4288	community	Cross-sectional study	Jan	Dec	2011	2011	Surin	Khwao Sinarin	_x0000__x0000__x0000__x0000__x0000__x0000__x0000__x0000__x0000__x0000__x0000__x0000__x0000__x0000__x0000__x0000__x0000__x0000__x0000__x0000__x0000__x0000__x0000__x0000__x0000__x0000__x0000__x0000__x0000__x0000__x0000__x0000__x0000__x0000__x0000__x0000__x0000__x0000__x0000__x0000__x0000__x0000__x0000__x0000__x0000__x0000__x0000__x0000__x0000__x0000__x0000__x0000__x0000__x0000__x0000__x0000__x0000_…		ADM2	15.0052	103.618	google map	Kato-Katz	60	>90	22	1	4.55
385	Thailand	Community-based cross-sectional study of carcinogenic human liver fluke in elderly from Surin province, Thailand	Kaewpitoon SJ, Rujirakul R, Ueng-Arporn N, Matrakool L, Namwichaisiriku N, Churproong S, Wongkaewpothong P, Nimkuntod P, Sripa B, Kaewpitoon N	Asian Pacific Journal of Cancer Prevention	2012	13	9	4285	4288	community	Cross-sectional study	Jan	Dec	2011	2011	Surin	Samrong Thap	_x0000__x0000__x0000__x0000__x0000__x0000__x0000__x0000__x0000__x0000__x0000__x0000__x0000__x0000__x0000__x0000__x0000__x0000__x0000__x0000__x0000__x0000__x0000__x0000__x0000__x0000__x0000__x0000__x0000__x0000__x0000__x0000__x0000__x0000__x0000__x0000__x0000__x0000__x0000__x0000__x0000__x0000__x0000__x0000__x0000__x0000__x0000__x0000__x0000__x0000__x0000__x0000__x0000__x0000__x0000__x0000__x0000_…		ADM2	15.0421	103.944	google map	Kato-Katz	60	>90	21	4	19.05
386	Thailand	Community-based cross-sectional study of carcinogenic human liver fluke in elderly from Surin province, Thailand	Kaewpitoon SJ, Rujirakul R, Ueng-Arporn N, Matrakool L, Namwichaisiriku N, Churproong S, Wongkaewpothong P, Nimkuntod P, Sripa B, Kaewpitoon N	Asian Pacific Journal of Cancer Prevention	2012	13	9	4285	4288	community	Cross-sectional study	Jan	Dec	2011	2011	Surin	Chom Phra	_x0000__x0000__x0000__x0000__x0000__x0000__x0000__x0000__x0000__x0000__x0000__x0000__x0000__x0000__x0000__x0000__x0000__x0000__x0000__x0000__x0000__x0000__x0000__x0000__x0000__x0000__x0000__x0000__x0000__x0000__x0000__x0000__x0000__x0000__x0000__x0000__x0000__x0000__x0000__x0000__x0000__x0000__x0000__x0000__x0000__x0000__x0000__x0000__x0000__x0000__x0000__x0000__x0000__x0000__x0000__x0000__x0000_…		ADM2	15.1388	103.582	google map	Kato-Katz	60	>90	17	0	0
387	Thailand	Community-based cross-sectional study of carcinogenic human liver fluke in elderly from Surin province, Thailand	Kaewpitoon SJ, Rujirakul R, Ueng-Arporn N, Matrakool L, Namwichaisiriku N, Churproong S, Wongkaewpothong P, Nimkuntod P, Sripa B, Kaewpitoon N	Asian Pacific Journal of Cancer Prevention	2012	13	9	4285	4288	community	Cross-sectional study	Jan	Dec	2011	2011	Surin	Sanom	_x0000__x0000__x0000__x0000__x0000__x0000__x0000__x0000__x0000__x0000__x0000__x0000__x0000__x0000__x0000__x0000__x0000__x0000__x0000__x0000__x0000__x0000__x0000__x0000__x0000__x0000__x0000__x0000__x0000__x0000__x0000__x0000__x0000__x0000__x0000__x0000__x0000__x0000__x0000__x0000__x0000__x0000__x0000__x0000__x0000__x0000__x0000__x0000__x0000__x0000__x0000__x0000__x0000__x0000__x0000__x0000__x0000_…		ADM2	15.1775	103.784	google map	Kato-Katz	60	>90	22	0	0
388	Thailand	Community-based cross-sectional study of carcinogenic human liver fluke in elderly from Surin province, Thailand	Kaewpitoon SJ, Rujirakul R, Ueng-Arporn N, Matrakool L, Namwichaisiriku N, Churproong S, Wongkaewpothong P, Nimkuntod P, Sripa B, Kaewpitoon N	Asian Pacific Journal of Cancer Prevention	2012	13	9	4285	4288	community	Cross-sectional study	Jan	Dec	2011	2011	Surin	Non Narai	_x0000__x0000__x0000__x0000__x0000__x0000__x0000__x0000__x0000__x0000__x0000__x0000__x0000__x0000__x0000__x0000__x0000__x0000__x0000__x0000__x0000__x0000__x0000__x0000__x0000__x0000__x0000__x0000__x0000__x0000__x0000__x0000__x0000__x0000__x0000__x0000__x0000__x0000__x0000__x0000__x0000__x0000__x0000__x0000__x0000__x0000__x0000__x0000__x0000__x0000__x0000__x0000__x0000__x0000__x0000__x0000__x0000_…		ADM2	15.1946	103.909	google map	Kato-Katz	60	>90	19	0	0
389	Thailand	Community-based cross-sectional study of carcinogenic human liver fluke in elderly from Surin province, Thailand	Kaewpitoon SJ, Rujirakul R, Ueng-Arporn N, Matrakool L, Namwichaisiriku N, Churproong S, Wongkaewpothong P, Nimkuntod P, Sripa B, Kaewpitoon N	Asian Pacific Journal of Cancer Prevention	2012	13	9	4285	4288	community	Cross-sectional study	Jan	Dec	2011	2011	Surin	Tha Tum	_x0000__x0000__x0000__x0000__x0000__x0000__x0000__x0000__x0000__x0000__x0000__x0000__x0000__x0000__x0000__x0000__x0000__x0000__x0000__x0000__x0000__x0000__x0000__x0000__x0000__x0000__x0000__x0000__x0000__x0000__x0000__x0000__x0000__x0000__x0000__x0000__x0000__x0000__x0000__x0000__x0000__x0000__x0000__x0000__x0000__x0000__x0000__x0000__x0000__x0000__x0000__x0000__x0000__x0000__x0000__x0000__x0000_…		ADM2	15.3092	103.648	google map	Kato-Katz	60	>90	23	9	39.13
390	Thailand	Community-based cross-sectional study of carcinogenic human liver fluke in elderly from Surin province, Thailand	Kaewpitoon SJ, Rujirakul R, Ueng-Arporn N, Matrakool L, Namwichaisiriku N, Churproong S, Wongkaewpothong P, Nimkuntod P, Sripa B, Kaewpitoon N	Asian Pacific Journal of Cancer Prevention	2012	13	9	4285	4288	community	Cross-sectional study	Jan	Jan	2011	2011	Surin	Rattanaburi	_x0000__x0000__x0000__x0000__x0000__x0000__x0000__x0000__x0000__x0000__x0000__x0000__x0000__x0000__x0000__x0000__x0000__x0000__x0000__x0000__x0000__x0000__x0000__x0000__x0000__x0000__x0000__x0000__x0000__x0000__x0000__x0000__x0000__x0000__x0000__x0000__x0000__x0000__x0000__x0000__x0000__x0000__x0000__x0000__x0000__x0000__x0000__x0000__x0000__x0000__x0000__x0000__x0000__x0000__x0000__x0000__x0000_…		ADM2	15.3393	103.904	google map	Kato-Katz	60	>90	15	2	13.33
391	Thailand	Community-based cross-sectional study of carcinogenic human liver fluke in elderly from Surin province, Thailand	Kaewpitoon SJ, Rujirakul R, Ueng-Arporn N, Matrakool L, Namwichaisiriku N, Churproong S, Wongkaewpothong P, Nimkuntod P, Sripa B, Kaewpitoon N	Asian Pacific Journal of Cancer Prevention	2012	13	9	4285	4288	community	Cross-sectional study	Jan	Apr	2011	2011	Surin	Chumphon Buri	_x0000__x0000__x0000__x0000__x0000__x0000__x0000__x0000__x0000__x0000__x0000__x0000__x0000__x0000__x0000__x0000__x0000__x0000__x0000__x0000__x0000__x0000__x0000__x0000__x0000__x0000__x0000__x0000__x0000__x0000__x0000__x0000__x0000__x0000__x0000__x0000__x0000__x0000__x0000__x0000__x0000__x0000__x0000__x0000__x0000__x0000__x0000__x0000__x0000__x0000__x0000__x0000__x0000__x0000__x0000__x0000__x0000_…		ADM2	15.3833	103.368	google map	Kato-Katz	60	>90	17	1	5.88
392	Thailand	Comparison of stool examination techniques to detect Opisthorchis viverrini in low intensity infection	Charoensuk L, Subrungruang I, Mungthin M, Pinlaor S, Suwannahitatorn P	Acta Tropica	2018	191	_x0000__x0000__x0000__x0000__x0000_	13	16	community	Cross-sectional study	_x0000__x0000__x0000__x0000__x0000__x0000__x0000__x0000__x0000__x0000_	_x0000__x0000__x0000__x0000__x0000__x0000__x0000__x0000__x0000__x0000__x0000_	2015	2015	Sa Kaeo Province	Khao Chakan Districts	_x0000__x0000__x0000__x0000__x0000__x0000__x0000__x0000__x0000__x0000__x0000__x0000__x0000__x0000__x0000__x0000__x0000__x0000__x0000__x0000__x0000__x0000__x0000__x0000__x0000__x0000__x0000__x0000__x0000__x0000__x0000__x0000__x0000__x0000__x0000__x0000__x0000__x0000__x0000__x0000__x0000__x0000__x0000__x0000__x0000__x0000__x0000__x0000__x0000__x0000__x0000__x0000__x0000__x0000__x0000__x0000__x0000_…		ADM2	13.6224	102.024	google map	Combined (direct simple smear technique, Kato-Katz technique, FECT and FPCK)	1	≥50			34.4
393	Thailand	Comparison of stool examination techniques to detect Opisthorchis viverrini in low intensity infection	Charoensuk L, Subrungruang I, Mungthin M, Pinlaor S, Suwannahitatorn P	Acta Tropica	2018	191	_x0000__x0000__x0000__x0000__x0000_	13	16	community	Cross-sectional study	_x0000__x0000__x0000__x0000__x0000__x0000__x0000__x0000__x0000__x0000_	_x0000__x0000__x0000__x0000__x0000__x0000__x0000__x0000__x0000__x0000__x0000_	2015	2015	Chachoengsao Province	Sanam Chai Khet	_x0000__x0000__x0000__x0000__x0000__x0000__x0000__x0000__x0000__x0000__x0000__x0000__x0000__x0000__x0000__x0000__x0000__x0000__x0000__x0000__x0000__x0000__x0000__x0000__x0000__x0000__x0000__x0000__x0000__x0000__x0000__x0000__x0000__x0000__x0000__x0000__x0000__x0000__x0000__x0000__x0000__x0000__x0000__x0000__x0000__x0000__x0000__x0000__x0000__x0000__x0000__x0000__x0000__x0000__x0000__x0000__x0000_…		ADM2	13.6276	101.652	google map	Combined (direct simple smear technique, Kato-Katz technique, FECT and FPCK)	1	≥50			34.4
394	Thailand	Cross-sectional study of Opisthorchis viverrini infection and cholangiocarcinoma in communities within a high-risk area in northeast Thailand	Haswell-Elkins MR, Mairiang E, Mairiang P, Chaiyakum J, Chamadol N, Loapaiboon V, Sithithaworn P, Elkins DB	International Journal of Cancer	1994	59	4	505	509	community	Cross-sectional study	_x0000__x0000__x0000__x0000__x0000__x0000__x0000__x0000__x0000__x0000_	_x0000__x0000__x0000__x0000__x0000__x0000__x0000__x0000__x0000__x0000__x0000_	1990	1991	Khon Kaen province	Nongrua	_x0000__x0000__x0000__x0000__x0000__x0000__x0000__x0000__x0000__x0000__x0000__x0000__x0000__x0000__x0000__x0000__x0000__x0000__x0000__x0000__x0000__x0000__x0000__x0000__x0000__x0000__x0000__x0000__x0000__x0000__x0000__x0000__x0000__x0000__x0000__x0000__x0000__x0000__x0000__x0000__x0000__x0000__x0000__x0000__x0000__x0000__x0000__x0000__x0000__x0000__x0000__x0000__x0000__x0000__x0000__x0000__x0000_…		ADM2	16.4922	102.446	google map	FECT	24	>50	626	1	0.16
395	Thailand	Cross-sectional study of Opisthorchis viverrini infection and cholangiocarcinoma in communities within a high-risk area in northeast Thailand	Haswell-Elkins MR, Mairiang E, Mairiang P, Chaiyakum J, Chamadol N, Loapaiboon V, Sithithaworn P, Elkins DB	International Journal of Cancer	1994	59	4	505	509	community	Cross-sectional study	_x0000__x0000__x0000__x0000__x0000__x0000__x0000__x0000__x0000__x0000_	_x0000__x0000__x0000__x0000__x0000__x0000__x0000__x0000__x0000__x0000__x0000_	1990	1991	Khon Kaen province	Phuwiang	_x0000__x0000__x0000__x0000__x0000__x0000__x0000__x0000__x0000__x0000__x0000__x0000__x0000__x0000__x0000__x0000__x0000__x0000__x0000__x0000__x0000__x0000__x0000__x0000__x0000__x0000__x0000__x0000__x0000__x0000__x0000__x0000__x0000__x0000__x0000__x0000__x0000__x0000__x0000__x0000__x0000__x0000__x0000__x0000__x0000__x0000__x0000__x0000__x0000__x0000__x0000__x0000__x0000__x0000__x0000__x0000__x0000_…		ADM2	16.6695	102.465	google map	FECT	24	>50	806	11	1.36
396	Thailand	Evaluation of a short term effect of praziquantel treatment in opisthorchiasis-induced hepatobiliary inflammation by urinary 8-oxodG	Wangboon C, Worasith C, Thanan R, Eamudomkarn C, Techasen A, Sithithaworn J, Loilome W, Chamadol N, Pinlaor S, Jumnainsong A, Yongvanit P, Khuntikeo N, Bethony JM, Sithithaworn P	Acta Tropica	2019	189	_x0000__x0000__x0000__x0000__x0000_	124	128	community	Baseline of a randomized clinical trial	_x0000__x0000__x0000__x0000__x0000__x0000__x0000__x0000__x0000__x0000_	_x0000__x0000__x0000__x0000__x0000__x0000__x0000__x0000__x0000__x0000__x0000_			Khon Kaen Province	Chi River wetland	_x0000__x0000__x0000__x0000__x0000__x0000__x0000__x0000__x0000__x0000__x0000__x0000__x0000__x0000__x0000__x0000__x0000__x0000__x0000__x0000__x0000__x0000__x0000__x0000__x0000__x0000__x0000__x0000__x0000__x0000__x0000__x0000__x0000__x0000__x0000__x0000__x0000__x0000__x0000__x0000__x0000__x0000__x0000__x0000__x0000__x0000__x0000__x0000__x0000__x0000__x0000__x0000__x0000__x0000__x0000__x0000__x0000_…		ADM2	16.4092	102.905	google map	FECT	30		752	187	24.87
397	Thailand	Haplorchis taichui as a possible etiologic agent of irritable bowel syndrome-like symptoms	Watthanakulpanich D, Waikagul J, Maipanich W, Nuamtanong S, Sanguankiat S, Pubampen S, Praevanit R, Mongkhonmu S, Nawa Y	The Korean journal of parasitology	2010	48	3	225	229	community	Cross-sectional study	_x0000__x0000__x0000__x0000__x0000__x0000__x0000__x0000__x0000__x0000_	_x0000__x0000__x0000__x0000__x0000__x0000__x0000__x0000__x0000__x0000__x0000_			Nan Province	Chalerm Phrakiet District	_x0000__x0000__x0000__x0000__x0000__x0000__x0000__x0000__x0000__x0000__x0000__x0000__x0000__x0000__x0000__x0000__x0000__x0000__x0000__x0000__x0000__x0000__x0000__x0000__x0000__x0000__x0000__x0000__x0000__x0000__x0000__x0000__x0000__x0000__x0000__x0000__x0000__x0000__x0000__x0000__x0000__x0000__x0000__x0000__x0000__x0000__x0000__x0000__x0000__x0000__x0000__x0000__x0000__x0000__x0000__x0000__x0000_…		ADM2	19.5004	101.128	google map	Others (modified cellophane thick-smear method)			2540	0	0
398	Thailand	High prevalence of haplorchiasis in Nan and Lampang provinces, Thailand, proven by adult worm recovery from suspected opisthorchiasis cases	Wijit A, Morakote N, Klinchid J	The Korean journal of parasitology	2013	51	6	767	769	community	Cross-sectional study	_x0000__x0000__x0000__x0000__x0000__x0000__x0000__x0000__x0000__x0000_	_x0000__x0000__x0000__x0000__x0000__x0000__x0000__x0000__x0000__x0000__x0000_			Lampang Province	Chae Hom District	_x0000__x0000__x0000__x0000__x0000__x0000__x0000__x0000__x0000__x0000__x0000__x0000__x0000__x0000__x0000__x0000__x0000__x0000__x0000__x0000__x0000__x0000__x0000__x0000__x0000__x0000__x0000__x0000__x0000__x0000__x0000__x0000__x0000__x0000__x0000__x0000__x0000__x0000__x0000__x0000__x0000__x0000__x0000__x0000__x0000__x0000__x0000__x0000__x0000__x0000__x0000__x0000__x0000__x0000__x0000__x0000__x0000_…		ADM2	18.7494	99.6502	google map	Kato-Katz			100	0	0
399	Thailand	High prevalence of haplorchiasis in Nan and Lampang provinces, Thailand, proven by adult worm recovery from suspected opisthorchiasis cases	Wijit A, Morakote N, Klinchid J	The Korean journal of parasitology	2013	51	6	767	769	community	Cross-sectional study	_x0000__x0000__x0000__x0000__x0000__x0000__x0000__x0000__x0000__x0000_	_x0000__x0000__x0000__x0000__x0000__x0000__x0000__x0000__x0000__x0000__x0000_			Nan Province	Bo Kluea District	_x0000__x0000__x0000__x0000__x0000__x0000__x0000__x0000__x0000__x0000__x0000__x0000__x0000__x0000__x0000__x0000__x0000__x0000__x0000__x0000__x0000__x0000__x0000__x0000__x0000__x0000__x0000__x0000__x0000__x0000__x0000__x0000__x0000__x0000__x0000__x0000__x0000__x0000__x0000__x0000__x0000__x0000__x0000__x0000__x0000__x0000__x0000__x0000__x0000__x0000__x0000__x0000__x0000__x0000__x0000__x0000__x0000_…		ADM2	19.0928	101.199	google map	Kato-Katz			50	0	0
400	Thailand	Intestinal parasitic infections among school children in Thailand	Warunee N, Choomanee L, Sataporn P, Rapeeporn Y, Nuttapong W, Sompong S, Thongdee S, Bang-On S, Rachada K	Tropical Biomedicine	2007	24	2	83	88	school-based	Cross-sectional study	Nov	Dec	2004	2004	Nakhon Prathom	Phuttamonthon Distric	_x0000__x0000__x0000__x0000__x0000__x0000__x0000__x0000__x0000__x0000__x0000__x0000__x0000__x0000__x0000__x0000__x0000__x0000__x0000__x0000__x0000__x0000__x0000__x0000__x0000__x0000__x0000__x0000__x0000__x0000__x0000__x0000__x0000__x0000__x0000__x0000__x0000__x0000__x0000__x0000__x0000__x0000__x0000__x0000__x0000__x0000__x0000__x0000__x0000__x0000__x0000__x0000__x0000__x0000__x0000__x0000__x0000_…		ADM2	13.8254	100.29	google map	FECT	7	12	1920	1	0.05
401	Thailand	Liver fluke prevention and control in the northeast of Thailand through action research	Wongba N, Thaewnongiew K, Phathee K, Laithavewat L, Duangsong R, Promthet S, Tangsawad S	Asian Pacific Journal of Cancer Prevention	2011	12	5	1367	1370	community	Baseline of a follow-up treatment	_x0000__x0000__x0000__x0000__x0000__x0000__x0000__x0000__x0000__x0000_	_x0000__x0000__x0000__x0000__x0000__x0000__x0000__x0000__x0000__x0000__x0000_			Khon Kaen	Ban Phai district	_x0000__x0000__x0000__x0000__x0000__x0000__x0000__x0000__x0000__x0000__x0000__x0000__x0000__x0000__x0000__x0000__x0000__x0000__x0000__x0000__x0000__x0000__x0000__x0000__x0000__x0000__x0000__x0000__x0000__x0000__x0000__x0000__x0000__x0000__x0000__x0000__x0000__x0000__x0000__x0000__x0000__x0000__x0000__x0000__x0000__x0000__x0000__x0000__x0000__x0000__x0000__x0000__x0000__x0000__x0000__x0000__x0000_…		ADM2	16.0459	102.774	google map	Kato-Katz			96		11.7
402	Thailand	Mothers' Opisthorchis viverrini infection status and raw fish dish consumption in Lao People's Democratic Republic: determinants of child infection status	Araki H, Ong K, Lorphachan L, Soundala P, Iwagami M, Shibanuma A, Hongvanthong B, Brey PT, Kano S, Jimba M	Tropical Medicine and Health	2018	46	_x0000__x0000__x0000__x0000__x0000_	29	_x0000__x0000__x0000__x0000__x0000__x0000_	community	Cross-sectional study	Aug	Sep	2015	2015	Khammouane province	Yommalath district	_x0000__x0000__x0000__x0000__x0000__x0000__x0000__x0000__x0000__x0000__x0000__x0000__x0000__x0000__x0000__x0000__x0000__x0000__x0000__x0000__x0000__x0000__x0000__x0000__x0000__x0000__x0000__x0000__x0000__x0000__x0000__x0000__x0000__x0000__x0000__x0000__x0000__x0000__x0000__x0000__x0000__x0000__x0000__x0000__x0000__x0000__x0000__x0000__x0000__x0000__x0000__x0000__x0000__x0000__x0000__x0000__x0000_…		ADM2	17.5603	105.265	google map	Kato-Katz	5	15	679		87.9				135	85.4		100	79.4
403	Thailand	Nurses and Television as Sources of Information Effecting Behavioral Improvement Regarding Liver Flukes in Nakhon Ratchasima Province, Thailand	Kaewpitoon SJ, Kaewpitoon N, Rujirakul R, Wakkuwattapong P, Matrakul L, Tongtawee T, Loyd RA, Norkaew J, Kujapun J, Chavengkun W, Ponphimai S, Polsripradist P, Eksanti T, Phatisena T	Asian Pacific Journal of Cancer Prevention	2016	17	3	1097	1102	community	Cross-sectional study	Jul	Nov	2015	2015	Nakhon Ratchasima province	Chum Phuang district	_x0000__x0000__x0000__x0000__x0000__x0000__x0000__x0000__x0000__x0000__x0000__x0000__x0000__x0000__x0000__x0000__x0000__x0000__x0000__x0000__x0000__x0000__x0000__x0000__x0000__x0000__x0000__x0000__x0000__x0000__x0000__x0000__x0000__x0000__x0000__x0000__x0000__x0000__x0000__x0000__x0000__x0000__x0000__x0000__x0000__x0000__x0000__x0000__x0000__x0000__x0000__x0000__x0000__x0000__x0000__x0000__x0000_…		ADM2	15.2597	102.757	google map	Others (MiniParasep SF concentration technique)	30	>60	80		1.25
404	Thailand	Nutritional Status among Schoolchildren in the Risk Areas of Liver Fluke Infection, Surin Province, Thailand	Uengarporn N, Matrakool L, Kaewpitoon SJ, Rujirakul R, Churproong S, Kaewpitoon N	Journal of the Medical Association of Thailand	2016	99	7	17	23	community	Cross-sectional study	Sep	Jul	2013	2014	Surin province	Phanom Dong Rak	_x0000__x0000__x0000__x0000__x0000__x0000__x0000__x0000__x0000__x0000__x0000__x0000__x0000__x0000__x0000__x0000__x0000__x0000__x0000__x0000__x0000__x0000__x0000__x0000__x0000__x0000__x0000__x0000__x0000__x0000__x0000__x0000__x0000__x0000__x0000__x0000__x0000__x0000__x0000__x0000__x0000__x0000__x0000__x0000__x0000__x0000__x0000__x0000__x0000__x0000__x0000__x0000__x0000__x0000__x0000__x0000__x0000_…		ADM2	14.4276	103.311	google map	Kato-Katz	6	14	21		3.33
405	Thailand	Nutritional Status among Schoolchildren in the Risk Areas of Liver Fluke Infection, Surin Province, Thailand	Uengarporn N, Matrakool L, Kaewpitoon SJ, Rujirakul R, Churproong S, Kaewpitoon N	Journal of the Medical Association of Thailand	2016	99	7	17	23	community	Cross-sectional study	Sep	Jul	2013	2014	Surin province	Kap Choeng	_x0000__x0000__x0000__x0000__x0000__x0000__x0000__x0000__x0000__x0000__x0000__x0000__x0000__x0000__x0000__x0000__x0000__x0000__x0000__x0000__x0000__x0000__x0000__x0000__x0000__x0000__x0000__x0000__x0000__x0000__x0000__x0000__x0000__x0000__x0000__x0000__x0000__x0000__x0000__x0000__x0000__x0000__x0000__x0000__x0000__x0000__x0000__x0000__x0000__x0000__x0000__x0000__x0000__x0000__x0000__x0000__x0000_…		ADM2	14.4682	103.58	google map	Kato-Katz	6	14	36		0
406	Thailand	Nutritional Status among Schoolchildren in the Risk Areas of Liver Fluke Infection, Surin Province, Thailand	Uengarporn N, Matrakool L, Kaewpitoon SJ, Rujirakul R, Churproong S, Kaewpitoon N	Journal of the Medical Association of Thailand	2016	99	7	17	23	community	Cross-sectional study	Sep	Jul	2013	2014	Surin province	Buachet	_x0000__x0000__x0000__x0000__x0000__x0000__x0000__x0000__x0000__x0000__x0000__x0000__x0000__x0000__x0000__x0000__x0000__x0000__x0000__x0000__x0000__x0000__x0000__x0000__x0000__x0000__x0000__x0000__x0000__x0000__x0000__x0000__x0000__x0000__x0000__x0000__x0000__x0000__x0000__x0000__x0000__x0000__x0000__x0000__x0000__x0000__x0000__x0000__x0000__x0000__x0000__x0000__x0000__x0000__x0000__x0000__x0000_…		ADM2	14.4778	103.98	google map	Kato-Katz	6	14	38		13.33
407	Thailand	Nutritional Status among Schoolchildren in the Risk Areas of Liver Fluke Infection, Surin Province, Thailand	Uengarporn N, Matrakool L, Kaewpitoon SJ, Rujirakul R, Churproong S, Kaewpitoon N	Journal of the Medical Association of Thailand	2016	99	7	17	23	community	Cross-sectional study	Sep	Jul	2013	2014	Surin province	Sangkha	_x0000__x0000__x0000__x0000__x0000__x0000__x0000__x0000__x0000__x0000__x0000__x0000__x0000__x0000__x0000__x0000__x0000__x0000__x0000__x0000__x0000__x0000__x0000__x0000__x0000__x0000__x0000__x0000__x0000__x0000__x0000__x0000__x0000__x0000__x0000__x0000__x0000__x0000__x0000__x0000__x0000__x0000__x0000__x0000__x0000__x0000__x0000__x0000__x0000__x0000__x0000__x0000__x0000__x0000__x0000__x0000__x0000_…		ADM2	14.572	103.838	google map	Kato-Katz	6	14	27		16.67
408	Thailand	Nutritional Status among Schoolchildren in the Risk Areas of Liver Fluke Infection, Surin Province, Thailand	Uengarporn N, Matrakool L, Kaewpitoon SJ, Rujirakul R, Churproong S, Kaewpitoon N	Journal of the Medical Association of Thailand	2016	99	7	17	23	community	Cross-sectional study	Sep	Jul	2013	2014	Surin province	Prasat	_x0000__x0000__x0000__x0000__x0000__x0000__x0000__x0000__x0000__x0000__x0000__x0000__x0000__x0000__x0000__x0000__x0000__x0000__x0000__x0000__x0000__x0000__x0000__x0000__x0000__x0000__x0000__x0000__x0000__x0000__x0000__x0000__x0000__x0000__x0000__x0000__x0000__x0000__x0000__x0000__x0000__x0000__x0000__x0000__x0000__x0000__x0000__x0000__x0000__x0000__x0000__x0000__x0000__x0000__x0000__x0000__x0000_…		ADM2	14.6279	103.415	google map	Kato-Katz	6	14	40		0
409	Thailand	Nutritional Status among Schoolchildren in the Risk Areas of Liver Fluke Infection, Surin Province, Thailand	Uengarporn N, Matrakool L, Kaewpitoon SJ, Rujirakul R, Churproong S, Kaewpitoon N	Journal of the Medical Association of Thailand	2016	99	7	17	23	community	Cross-sectional study	Sep	Jul	2013	2014	Surin province	Lamduan	_x0000__x0000__x0000__x0000__x0000__x0000__x0000__x0000__x0000__x0000__x0000__x0000__x0000__x0000__x0000__x0000__x0000__x0000__x0000__x0000__x0000__x0000__x0000__x0000__x0000__x0000__x0000__x0000__x0000__x0000__x0000__x0000__x0000__x0000__x0000__x0000__x0000__x0000__x0000__x0000__x0000__x0000__x0000__x0000__x0000__x0000__x0000__x0000__x0000__x0000__x0000__x0000__x0000__x0000__x0000__x0000__x0000_…		ADM2	14.7151	103.694	google map	Kato-Katz	6	14	23		3.33
410	Thailand	Nutritional Status among Schoolchildren in the Risk Areas of Liver Fluke Infection, Surin Province, Thailand	Uengarporn N, Matrakool L, Kaewpitoon SJ, Rujirakul R, Churproong S, Kaewpitoon N	Journal of the Medical Association of Thailand	2016	99	7	17	23	community	Cross-sectional study	Sep	Jul	2013	2014	Surin province	Si Narong	_x0000__x0000__x0000__x0000__x0000__x0000__x0000__x0000__x0000__x0000__x0000__x0000__x0000__x0000__x0000__x0000__x0000__x0000__x0000__x0000__x0000__x0000__x0000__x0000__x0000__x0000__x0000__x0000__x0000__x0000__x0000__x0000__x0000__x0000__x0000__x0000__x0000__x0000__x0000__x0000__x0000__x0000__x0000__x0000__x0000__x0000__x0000__x0000__x0000__x0000__x0000__x0000__x0000__x0000__x0000__x0000__x0000_…		ADM2	14.7795	103.885	google map	Kato-Katz	6	14	21		13.33
411	Thailand	Nutritional Status among Schoolchildren in the Risk Areas of Liver Fluke Infection, Surin Province, Thailand	Uengarporn N, Matrakool L, Kaewpitoon SJ, Rujirakul R, Churproong S, Kaewpitoon N	Journal of the Medical Association of Thailand	2016	99	7	17	23	community	Cross-sectional study	Sep	Jul	2013	2014	Surin province	Mueang Surin	_x0000__x0000__x0000__x0000__x0000__x0000__x0000__x0000__x0000__x0000__x0000__x0000__x0000__x0000__x0000__x0000__x0000__x0000__x0000__x0000__x0000__x0000__x0000__x0000__x0000__x0000__x0000__x0000__x0000__x0000__x0000__x0000__x0000__x0000__x0000__x0000__x0000__x0000__x0000__x0000__x0000__x0000__x0000__x0000__x0000__x0000__x0000__x0000__x0000__x0000__x0000__x0000__x0000__x0000__x0000__x0000__x0000_…		ADM2	14.8837	103.513	google map	Kato-Katz	6	14	14		3.33
412	Thailand	Nutritional Status among Schoolchildren in the Risk Areas of Liver Fluke Infection, Surin Province, Thailand	Uengarporn N, Matrakool L, Kaewpitoon SJ, Rujirakul R, Churproong S, Kaewpitoon N	Journal of the Medical Association of Thailand	2016	99	7	17	23	community	Cross-sectional study	Sep	Jul	2013	2014	Surin province	Sikhoraphum	_x0000__x0000__x0000__x0000__x0000__x0000__x0000__x0000__x0000__x0000__x0000__x0000__x0000__x0000__x0000__x0000__x0000__x0000__x0000__x0000__x0000__x0000__x0000__x0000__x0000__x0000__x0000__x0000__x0000__x0000__x0000__x0000__x0000__x0000__x0000__x0000__x0000__x0000__x0000__x0000__x0000__x0000__x0000__x0000__x0000__x0000__x0000__x0000__x0000__x0000__x0000__x0000__x0000__x0000__x0000__x0000__x0000_…		ADM2	14.9479	103.783	google map	Kato-Katz	6	14	20		0
413	Thailand	Nutritional Status among Schoolchildren in the Risk Areas of Liver Fluke Infection, Surin Province, Thailand	Uengarporn N, Matrakool L, Kaewpitoon SJ, Rujirakul R, Churproong S, Kaewpitoon N	Journal of the Medical Association of Thailand	2016	99	7	17	23	community	Cross-sectional study	Sep	Jul	2013	2014	Surin province	Khwao Sinarin	_x0000__x0000__x0000__x0000__x0000__x0000__x0000__x0000__x0000__x0000__x0000__x0000__x0000__x0000__x0000__x0000__x0000__x0000__x0000__x0000__x0000__x0000__x0000__x0000__x0000__x0000__x0000__x0000__x0000__x0000__x0000__x0000__x0000__x0000__x0000__x0000__x0000__x0000__x0000__x0000__x0000__x0000__x0000__x0000__x0000__x0000__x0000__x0000__x0000__x0000__x0000__x0000__x0000__x0000__x0000__x0000__x0000_…		ADM2	15.0052	103.618	google map	Kato-Katz	6	14	34		3.33
414	Thailand	Nutritional Status among Schoolchildren in the Risk Areas of Liver Fluke Infection, Surin Province, Thailand	Uengarporn N, Matrakool L, Kaewpitoon SJ, Rujirakul R, Churproong S, Kaewpitoon N	Journal of the Medical Association of Thailand	2016	99	7	17	23	community	Cross-sectional study	Sep	Jul	2013	2014	Surin province	Samrong Thap	_x0000__x0000__x0000__x0000__x0000__x0000__x0000__x0000__x0000__x0000__x0000__x0000__x0000__x0000__x0000__x0000__x0000__x0000__x0000__x0000__x0000__x0000__x0000__x0000__x0000__x0000__x0000__x0000__x0000__x0000__x0000__x0000__x0000__x0000__x0000__x0000__x0000__x0000__x0000__x0000__x0000__x0000__x0000__x0000__x0000__x0000__x0000__x0000__x0000__x0000__x0000__x0000__x0000__x0000__x0000__x0000__x0000_…		ADM2	15.0421	103.944	google map	Kato-Katz	6	14	29		13.33
415	Thailand	Nutritional Status among Schoolchildren in the Risk Areas of Liver Fluke Infection, Surin Province, Thailand	Uengarporn N, Matrakool L, Kaewpitoon SJ, Rujirakul R, Churproong S, Kaewpitoon N	Journal of the Medical Association of Thailand	2016	99	7	17	23	community	Cross-sectional study	Sep	Jul	2013	2014	Surin province	Chom Phra	_x0000__x0000__x0000__x0000__x0000__x0000__x0000__x0000__x0000__x0000__x0000__x0000__x0000__x0000__x0000__x0000__x0000__x0000__x0000__x0000__x0000__x0000__x0000__x0000__x0000__x0000__x0000__x0000__x0000__x0000__x0000__x0000__x0000__x0000__x0000__x0000__x0000__x0000__x0000__x0000__x0000__x0000__x0000__x0000__x0000__x0000__x0000__x0000__x0000__x0000__x0000__x0000__x0000__x0000__x0000__x0000__x0000_…		ADM2	15.1388	103.582	google map	Kato-Katz	6	14	23		3.33
416	Thailand	Nutritional Status among Schoolchildren in the Risk Areas of Liver Fluke Infection, Surin Province, Thailand	Uengarporn N, Matrakool L, Kaewpitoon SJ, Rujirakul R, Churproong S, Kaewpitoon N	Journal of the Medical Association of Thailand	2016	99	7	17	23	community	Cross-sectional study	Sep	Jul	2013	2014	Surin province	Sanom	_x0000__x0000__x0000__x0000__x0000__x0000__x0000__x0000__x0000__x0000__x0000__x0000__x0000__x0000__x0000__x0000__x0000__x0000__x0000__x0000__x0000__x0000__x0000__x0000__x0000__x0000__x0000__x0000__x0000__x0000__x0000__x0000__x0000__x0000__x0000__x0000__x0000__x0000__x0000__x0000__x0000__x0000__x0000__x0000__x0000__x0000__x0000__x0000__x0000__x0000__x0000__x0000__x0000__x0000__x0000__x0000__x0000_…		ADM2	15.1775	103.784	google map	Kato-Katz	6	14	33		3.33
417	Thailand	Nutritional Status among Schoolchildren in the Risk Areas of Liver Fluke Infection, Surin Province, Thailand	Uengarporn N, Matrakool L, Kaewpitoon SJ, Rujirakul R, Churproong S, Kaewpitoon N	Journal of the Medical Association of Thailand	2016	99	7	17	23	community	Cross-sectional study	Sep	Jul	2013	2014	Surin province	Non Narai	_x0000__x0000__x0000__x0000__x0000__x0000__x0000__x0000__x0000__x0000__x0000__x0000__x0000__x0000__x0000__x0000__x0000__x0000__x0000__x0000__x0000__x0000__x0000__x0000__x0000__x0000__x0000__x0000__x0000__x0000__x0000__x0000__x0000__x0000__x0000__x0000__x0000__x0000__x0000__x0000__x0000__x0000__x0000__x0000__x0000__x0000__x0000__x0000__x0000__x0000__x0000__x0000__x0000__x0000__x0000__x0000__x0000_…		ADM2	15.1946	103.909	google map	Kato-Katz	6	14	14		3.33
418	Thailand	Nutritional Status among Schoolchildren in the Risk Areas of Liver Fluke Infection, Surin Province, Thailand	Uengarporn N, Matrakool L, Kaewpitoon SJ, Rujirakul R, Churproong S, Kaewpitoon N	Journal of the Medical Association of Thailand	2016	99	7	17	23	community	Cross-sectional study	Sep	Jul	2013	2014	Surin province	Tha Tum	_x0000__x0000__x0000__x0000__x0000__x0000__x0000__x0000__x0000__x0000__x0000__x0000__x0000__x0000__x0000__x0000__x0000__x0000__x0000__x0000__x0000__x0000__x0000__x0000__x0000__x0000__x0000__x0000__x0000__x0000__x0000__x0000__x0000__x0000__x0000__x0000__x0000__x0000__x0000__x0000__x0000__x0000__x0000__x0000__x0000__x0000__x0000__x0000__x0000__x0000__x0000__x0000__x0000__x0000__x0000__x0000__x0000_…		ADM2	15.3092	103.648	google map	Kato-Katz	6	14	39		16.67
419	Thailand	Nutritional Status among Schoolchildren in the Risk Areas of Liver Fluke Infection, Surin Province, Thailand	Uengarporn N, Matrakool L, Kaewpitoon SJ, Rujirakul R, Churproong S, Kaewpitoon N	Journal of the Medical Association of Thailand	2016	99	7	17	23	community	Cross-sectional study	Sep	Jul	2013	2014	Surin province	Rattanaburi	_x0000__x0000__x0000__x0000__x0000__x0000__x0000__x0000__x0000__x0000__x0000__x0000__x0000__x0000__x0000__x0000__x0000__x0000__x0000__x0000__x0000__x0000__x0000__x0000__x0000__x0000__x0000__x0000__x0000__x0000__x0000__x0000__x0000__x0000__x0000__x0000__x0000__x0000__x0000__x0000__x0000__x0000__x0000__x0000__x0000__x0000__x0000__x0000__x0000__x0000__x0000__x0000__x0000__x0000__x0000__x0000__x0000_…		ADM2	15.3393	103.904	google map	Kato-Katz	6	14	35		10
420	Thailand	Nutritional Status among Schoolchildren in the Risk Areas of Liver Fluke Infection, Surin Province, Thailand	Uengarporn N, Matrakool L, Kaewpitoon SJ, Rujirakul R, Churproong S, Kaewpitoon N	Journal of the Medical Association of Thailand	2016	99	7	17	23	community	Cross-sectional study	Sep	Jul	2013	2014	Surin province	Chumphon Buri	_x0000__x0000__x0000__x0000__x0000__x0000__x0000__x0000__x0000__x0000__x0000__x0000__x0000__x0000__x0000__x0000__x0000__x0000__x0000__x0000__x0000__x0000__x0000__x0000__x0000__x0000__x0000__x0000__x0000__x0000__x0000__x0000__x0000__x0000__x0000__x0000__x0000__x0000__x0000__x0000__x0000__x0000__x0000__x0000__x0000__x0000__x0000__x0000__x0000__x0000__x0000__x0000__x0000__x0000__x0000__x0000__x0000_…		ADM2	15.3833	103.368	google map	Kato-Katz	6	14	15		6.67
421	Thailand	Opisthorchis viverrini Infection Among People in the Border Areas of Three Provinces, Northeast of Thailand	Kaewpitoon SJ, Rujirakul R, Wakkuwattapong R, Matrakool L, Tongtawee T, Panpimanmas S, Pengsaa P, Jomkoa D, Joosiri A, Kaewpitoon N	Asian Pacific Journal of Cancer Prevention	2016	17	6	2973	2977	community	Cross-sectional study	Oct	Mar	2015	2016	Nakhon Ratchasima	Kaeng Sanam Nang	_x0000__x0000__x0000__x0000__x0000__x0000__x0000__x0000__x0000__x0000__x0000__x0000__x0000__x0000__x0000__x0000__x0000__x0000__x0000__x0000__x0000__x0000__x0000__x0000__x0000__x0000__x0000__x0000__x0000__x0000__x0000__x0000__x0000__x0000__x0000__x0000__x0000__x0000__x0000__x0000__x0000__x0000__x0000__x0000__x0000__x0000__x0000__x0000__x0000__x0000__x0000__x0000__x0000__x0000__x0000__x0000__x0000_…		ADM2	15.7003	102.249	google map	Kato-Katz	40	61	319	3	1.8
422	Thailand	Opisthorchis viverrini Infection Among People in the Border Areas of Three Provinces, Northeast of Thailand	Kaewpitoon SJ, Rujirakul R, Wakkuwattapong R, Matrakool L, Tongtawee T, Panpimanmas S, Pengsaa P, Jomkoa D, Joosiri A, Kaewpitoon N	Asian Pacific Journal of Cancer Prevention	2016	17	6	2973	2977	community	Cross-sectional study	Oct	Mar	2015	2016	Khon Kaen	Waeng Noi	_x0000__x0000__x0000__x0000__x0000__x0000__x0000__x0000__x0000__x0000__x0000__x0000__x0000__x0000__x0000__x0000__x0000__x0000__x0000__x0000__x0000__x0000__x0000__x0000__x0000__x0000__x0000__x0000__x0000__x0000__x0000__x0000__x0000__x0000__x0000__x0000__x0000__x0000__x0000__x0000__x0000__x0000__x0000__x0000__x0000__x0000__x0000__x0000__x0000__x0000__x0000__x0000__x0000__x0000__x0000__x0000__x0000_…		ADM2	15.8057	102.416	google map	Kato-Katz	40	61	282	0	0
423	Thailand	Opisthorchis viverrini Infection Among People in the Border Areas of Three Provinces, Northeast of Thailand	Kaewpitoon SJ, Rujirakul R, Wakkuwattapong R, Matrakool L, Tongtawee T, Panpimanmas S, Pengsaa P, Jomkoa D, Joosiri A, Kaewpitoon N	Asian Pacific Journal of Cancer Prevention	2016	17	6	2973	2977	community	Cross-sectional study	Oct	Mar	2015	2016	Chaiyaphum	Khon Sawan district	_x0000__x0000__x0000__x0000__x0000__x0000__x0000__x0000__x0000__x0000__x0000__x0000__x0000__x0000__x0000__x0000__x0000__x0000__x0000__x0000__x0000__x0000__x0000__x0000__x0000__x0000__x0000__x0000__x0000__x0000__x0000__x0000__x0000__x0000__x0000__x0000__x0000__x0000__x0000__x0000__x0000__x0000__x0000__x0000__x0000__x0000__x0000__x0000__x0000__x0000__x0000__x0000__x0000__x0000__x0000__x0000__x0000_…		ADM2	15.9312	102.274	google map	Kato-Katz	40	61	377	14	8.43
424	Thailand	Opisthorchis viverrini infection in Thailand: symptoms and signs of infection--a population-based study	Pungpak S, Chalermrut K, Harinasuta T, Viravan C, Schelp PF, Hempfling A, Schlattmann P, Bunnag D	Transactions of the Royal Society of Tropical Medicine and Hygiene	1994	88	5	561	564	community	Baseline of a randomized clinical trial	Mar	Mar	1990	1992	Prachinburi province	Kabinburi District	_x0000__x0000__x0000__x0000__x0000__x0000__x0000__x0000__x0000__x0000__x0000__x0000__x0000__x0000__x0000__x0000__x0000__x0000__x0000__x0000__x0000__x0000__x0000__x0000__x0000__x0000__x0000__x0000__x0000__x0000__x0000__x0000__x0000__x0000__x0000__x0000__x0000__x0000__x0000__x0000__x0000__x0000__x0000__x0000__x0000__x0000__x0000__x0000__x0000__x0000__x0000__x0000__x0000__x0000__x0000__x0000__x0000_…		ADM2	13.8914	101.793	google map	Not stated or missing			1224	410	33.5
425	Thailand	Overweight Relation to Liver Fluke Infection among Rural Participants from 4 Districts of Nakhon Ratchasima Province, Thailand	Kaewpitoon SJ, Rujirakul R, Wakkuwattapong P, Matrakool L, Tongtawee T, Panpimanmas S, Kujapun J, Norkaew J, Photipim M, Ponphimai S, Chavengkun W, Kompor P, Padchasuwan N, Sawaspol S, Phandee MC, Phandee W, Phanurak W, Kaewpitoon N	Asian Pacific Journal of Cancer Prevention	2016	17	5	2565	2571	community	Cross-sectional study	Jun	Mar	2015	2016	Nakhon Ratchasima	Chum Phuang	_x0000__x0000__x0000__x0000__x0000__x0000__x0000__x0000__x0000__x0000__x0000__x0000__x0000__x0000__x0000__x0000__x0000__x0000__x0000__x0000__x0000__x0000__x0000__x0000__x0000__x0000__x0000__x0000__x0000__x0000__x0000__x0000__x0000__x0000__x0000__x0000__x0000__x0000__x0000__x0000__x0000__x0000__x0000__x0000__x0000__x0000__x0000__x0000__x0000__x0000__x0000__x0000__x0000__x0000__x0000__x0000__x0000_…		ADM2	15.2597	102.757	google map	Kato-Katz	≤40	≥61	163	3	1.84
426	Thailand	Overweight Relation to Liver Fluke Infection among Rural Participants from 4 Districts of Nakhon Ratchasima Province, Thailand	Kaewpitoon SJ, Rujirakul R, Wakkuwattapong P, Matrakool L, Tongtawee T, Panpimanmas S, Kujapun J, Norkaew J, Photipim M, Ponphimai S, Chavengkun W, Kompor P, Padchasuwan N, Sawaspol S, Phandee MC, Phandee W, Phanurak W, Kaewpitoon N	Asian Pacific Journal of Cancer Prevention	2016	17	5	2565	2571	community	Cross-sectional study	Jun	Mar	2015	2016	Nakhon Ratchasima	Mueang Yang district	_x0000__x0000__x0000__x0000__x0000__x0000__x0000__x0000__x0000__x0000__x0000__x0000__x0000__x0000__x0000__x0000__x0000__x0000__x0000__x0000__x0000__x0000__x0000__x0000__x0000__x0000__x0000__x0000__x0000__x0000__x0000__x0000__x0000__x0000__x0000__x0000__x0000__x0000__x0000__x0000__x0000__x0000__x0000__x0000__x0000__x0000__x0000__x0000__x0000__x0000__x0000__x0000__x0000__x0000__x0000__x0000__x0000_…		ADM2	15.4386	102.893	google map	Kato-Katz	≤40	≥61	71	2	2.82
427	Thailand	Overweight Relation to Liver Fluke Infection among Rural Participants from 4 Districts of Nakhon Ratchasima Province, Thailand	Kaewpitoon SJ, Rujirakul R, Wakkuwattapong P, Matrakool L, Tongtawee T, Panpimanmas S, Kujapun J, Norkaew J, Photipim M, Ponphimai S, Chavengkun W, Kompor P, Padchasuwan N, Sawaspol S, Phandee MC, Phandee W, Phanurak W, Kaewpitoon N	Asian Pacific Journal of Cancer Prevention	2016	17	5	2565	2571	community	Cross-sectional study	Jun	Mar	2015	2016	Nakhon Ratchasima	Bua Yai district	_x0000__x0000__x0000__x0000__x0000__x0000__x0000__x0000__x0000__x0000__x0000__x0000__x0000__x0000__x0000__x0000__x0000__x0000__x0000__x0000__x0000__x0000__x0000__x0000__x0000__x0000__x0000__x0000__x0000__x0000__x0000__x0000__x0000__x0000__x0000__x0000__x0000__x0000__x0000__x0000__x0000__x0000__x0000__x0000__x0000__x0000__x0000__x0000__x0000__x0000__x0000__x0000__x0000__x0000__x0000__x0000__x0000_…		ADM2	15.5854	102.385	google map	Kato-Katz	≤40	≥61	121	3	2.48
428	Thailand	Overweight Relation to Liver Fluke Infection among Rural Participants from 4 Districts of Nakhon Ratchasima Province, Thailand	Kaewpitoon SJ, Rujirakul R, Wakkuwattapong P, Matrakool L, Tongtawee T, Panpimanmas S, Kujapun J, Norkaew J, Photipim M, Ponphimai S, Chavengkun W, Kompor P, Padchasuwan N, Sawaspol S, Phandee MC, Phandee W, Phanurak W, Kaewpitoon N	Asian Pacific Journal of Cancer Prevention	2016	17	5	2565	2571	community	Cross-sectional study	Jun	Mar	2015	2016	Nakhon Ratchasima	Kaeng Sanam Nang district	_x0000__x0000__x0000__x0000__x0000__x0000__x0000__x0000__x0000__x0000__x0000__x0000__x0000__x0000__x0000__x0000__x0000__x0000__x0000__x0000__x0000__x0000__x0000__x0000__x0000__x0000__x0000__x0000__x0000__x0000__x0000__x0000__x0000__x0000__x0000__x0000__x0000__x0000__x0000__x0000__x0000__x0000__x0000__x0000__x0000__x0000__x0000__x0000__x0000__x0000__x0000__x0000__x0000__x0000__x0000__x0000__x0000_…		ADM2	15.7003	102.249	google map	Kato-Katz	≤40	≥61	375	4	1.07
429	Thailand	Prevalence and Associated Risk Factors of Intestinal Parasites in Humans and Domestic Animals across Borders of Thailand and Lao Pdr: Focus on Hookworm and Threadworm	Niamnuy N, Kaewthamasorn M, Congpuong K, Phaytanavanh B, Lohsoonthorn VKanungnit,Phaytanavanh, Bounthanh,Lohsoonthorn, Vitool	The Southeast Asian Journal of Tropical Medicine and Public Health	2016	47	5	901	911	community	Cross-sectional study	_x0000__x0000__x0000__x0000__x0000__x0000__x0000__x0000__x0000__x0000_	_x0000__x0000__x0000__x0000__x0000__x0000__x0000__x0000__x0000__x0000__x0000_			Ubon Ratchathani	Sirindhorn,Warin Chamrab,Khong Chiam	_x0000__x0000__x0000__x0000__x0000__x0000__x0000__x0000__x0000__x0000__x0000__x0000__x0000__x0000__x0000__x0000__x0000__x0000__x0000__x0000__x0000__x0000__x0000__x0000__x0000__x0000__x0000__x0000__x0000__x0000__x0000__x0000__x0000__x0000__x0000__x0000__x0000__x0000__x0000__x0000__x0000__x0000__x0000__x0000__x0000__x0000__x0000__x0000__x0000__x0000__x0000__x0000__x0000__x0000__x0000__x0000__x0000_…		ADM2	15.1122	105.438	google map	FECT	≤15	≥61	429		4.4
430	Thailand	Prevalence and intensity of Opisthorchis viverrini in rural community near the Mekong River on the Thai-Laos border in northeast Thailand	Maleewong W, Intapan P, Wongwajana S, Sitthithaworn P, Pipitgool V, Wongkham C, Daenseegaew W	Journal of the Medical Association of Thailand	1992	75	4	231	235	community	Cross-sectional study	Apr	Jun	1989	1989	Nakhon Phanom	That Phanom district	_x0000__x0000__x0000__x0000__x0000__x0000__x0000__x0000__x0000__x0000__x0000__x0000__x0000__x0000__x0000__x0000__x0000__x0000__x0000__x0000__x0000__x0000__x0000__x0000__x0000__x0000__x0000__x0000__x0000__x0000__x0000__x0000__x0000__x0000__x0000__x0000__x0000__x0000__x0000__x0000__x0000__x0000__x0000__x0000__x0000__x0000__x0000__x0000__x0000__x0000__x0000__x0000__x0000__x0000__x0000__x0000__x0000_…		ADM2	16.9643	104.704	google map	Kato-Katz			2412	1603	66.4			1120		65.9	1292		66.9
431	Thailand	Prevalence of Opisthorchis viverrini infection and incidence of cholangiocarcinoma in Khon Kaen, Northeast Thailand	Sriamporn S, Pisani P, Pipitgool V, Suwanrungruang K, Kamsa-ard S, Parkin DM	Tropical Medicine & International Health	2004	9	5	588	594	community	Cohort study	_x0000__x0000__x0000__x0000__x0000__x0000__x0000__x0000__x0000__x0000_	_x0000__x0000__x0000__x0000__x0000__x0000__x0000__x0000__x0000__x0000__x0000_	1996	2001	Khon Kaen	Nong Song Hong	_x0000__x0000__x0000__x0000__x0000__x0000__x0000__x0000__x0000__x0000__x0000__x0000__x0000__x0000__x0000__x0000__x0000__x0000__x0000__x0000__x0000__x0000__x0000__x0000__x0000__x0000__x0000__x0000__x0000__x0000__x0000__x0000__x0000__x0000__x0000__x0000__x0000__x0000__x0000__x0000__x0000__x0000__x0000__x0000__x0000__x0000__x0000__x0000__x0000__x0000__x0000__x0000__x0000__x0000__x0000__x0000__x0000_…		ADM2	15.7645	102.79	google map	Stoll's	35	69	471	77	16.3
432	Thailand	Prevalence of Opisthorchis viverrini infection and incidence of cholangiocarcinoma in Khon Kaen, Northeast Thailand	Sriamporn S, Pisani P, Pipitgool V, Suwanrungruang K, Kamsa-ard S, Parkin DM	Tropical Medicine & International Health	2004	9	5	588	594	community	Cohort study	_x0000__x0000__x0000__x0000__x0000__x0000__x0000__x0000__x0000__x0000_	_x0000__x0000__x0000__x0000__x0000__x0000__x0000__x0000__x0000__x0000__x0000_	1996	2001	Khon Kean	Waeng Noi	_x0000__x0000__x0000__x0000__x0000__x0000__x0000__x0000__x0000__x0000__x0000__x0000__x0000__x0000__x0000__x0000__x0000__x0000__x0000__x0000__x0000__x0000__x0000__x0000__x0000__x0000__x0000__x0000__x0000__x0000__x0000__x0000__x0000__x0000__x0000__x0000__x0000__x0000__x0000__x0000__x0000__x0000__x0000__x0000__x0000__x0000__x0000__x0000__x0000__x0000__x0000__x0000__x0000__x0000__x0000__x0000__x0000_…		ADM2	15.8057	102.416	google map	Stoll's	35	69	647	119	18.4
433	Thailand	Prevalence of Opisthorchis viverrini infection and incidence of cholangiocarcinoma in Khon Kaen, Northeast Thailand	Sriamporn S, Pisani P, Pipitgool V, Suwanrungruang K, Kamsa-ard S, Parkin DM	Tropical Medicine & International Health	2004	9	5	588	594	community	Cohort study	_x0000__x0000__x0000__x0000__x0000__x0000__x0000__x0000__x0000__x0000_	_x0000__x0000__x0000__x0000__x0000__x0000__x0000__x0000__x0000__x0000__x0000_	1996	2001	Khon Kaen	Phon	_x0000__x0000__x0000__x0000__x0000__x0000__x0000__x0000__x0000__x0000__x0000__x0000__x0000__x0000__x0000__x0000__x0000__x0000__x0000__x0000__x0000__x0000__x0000__x0000__x0000__x0000__x0000__x0000__x0000__x0000__x0000__x0000__x0000__x0000__x0000__x0000__x0000__x0000__x0000__x0000__x0000__x0000__x0000__x0000__x0000__x0000__x0000__x0000__x0000__x0000__x0000__x0000__x0000__x0000__x0000__x0000__x0000_…		ADM2	15.8068	102.591	google map	Stoll's	35	69	1026	147	14.3
434	Thailand	Prevalence of Opisthorchis viverrini infection and incidence of cholangiocarcinoma in Khon Kaen, Northeast Thailand	Sriamporn S, Pisani P, Pipitgool V, Suwanrungruang K, Kamsa-ard S, Parkin DM	Tropical Medicine & International Health	2004	9	5	588	594	community	Cohort study	_x0000__x0000__x0000__x0000__x0000__x0000__x0000__x0000__x0000__x0000_	_x0000__x0000__x0000__x0000__x0000__x0000__x0000__x0000__x0000__x0000__x0000_	1996	2001	Khon Kaen	Puai Noi	_x0000__x0000__x0000__x0000__x0000__x0000__x0000__x0000__x0000__x0000__x0000__x0000__x0000__x0000__x0000__x0000__x0000__x0000__x0000__x0000__x0000__x0000__x0000__x0000__x0000__x0000__x0000__x0000__x0000__x0000__x0000__x0000__x0000__x0000__x0000__x0000__x0000__x0000__x0000__x0000__x0000__x0000__x0000__x0000__x0000__x0000__x0000__x0000__x0000__x0000__x0000__x0000__x0000__x0000__x0000__x0000__x0000_…		ADM2	15.893	102.869	google map	Stoll's	35	69	363	46	12.7
435	Thailand	Prevalence of Opisthorchis viverrini infection and incidence of cholangiocarcinoma in Khon Kaen, Northeast Thailand	Sriamporn S, Pisani P, Pipitgool V, Suwanrungruang K, Kamsa-ard S, Parkin DM	Tropical Medicine & International Health	2004	9	5	588	594	community	Cohort study	_x0000__x0000__x0000__x0000__x0000__x0000__x0000__x0000__x0000__x0000_	_x0000__x0000__x0000__x0000__x0000__x0000__x0000__x0000__x0000__x0000__x0000_	1996	2001	Khon Kaen	Waeng Yai	_x0000__x0000__x0000__x0000__x0000__x0000__x0000__x0000__x0000__x0000__x0000__x0000__x0000__x0000__x0000__x0000__x0000__x0000__x0000__x0000__x0000__x0000__x0000__x0000__x0000__x0000__x0000__x0000__x0000__x0000__x0000__x0000__x0000__x0000__x0000__x0000__x0000__x0000__x0000__x0000__x0000__x0000__x0000__x0000__x0000__x0000__x0000__x0000__x0000__x0000__x0000__x0000__x0000__x0000__x0000__x0000__x0000_…		ADM2	15.9238	102.458	google map	Stoll's	35	69	292	85	29.1
436	Thailand	Prevalence of Opisthorchis viverrini infection and incidence of cholangiocarcinoma in Khon Kaen, Northeast Thailand	Sriamporn S, Pisani P, Pipitgool V, Suwanrungruang K, Kamsa-ard S, Parkin DM	Tropical Medicine & International Health	2004	9	5	588	594	community	Cohort study	_x0000__x0000__x0000__x0000__x0000__x0000__x0000__x0000__x0000__x0000_	_x0000__x0000__x0000__x0000__x0000__x0000__x0000__x0000__x0000__x0000__x0000_	1990	1995	Khon Kaen	Chonnabot	_x0000__x0000__x0000__x0000__x0000__x0000__x0000__x0000__x0000__x0000__x0000__x0000__x0000__x0000__x0000__x0000__x0000__x0000__x0000__x0000__x0000__x0000__x0000__x0000__x0000__x0000__x0000__x0000__x0000__x0000__x0000__x0000__x0000__x0000__x0000__x0000__x0000__x0000__x0000__x0000__x0000__x0000__x0000__x0000__x0000__x0000__x0000__x0000__x0000__x0000__x0000__x0000__x0000__x0000__x0000__x0000__x0000_…		ADM2	16.0224	102.559	google map	Stoll's	35	69	4059	1191	29.3
437	Thailand	Prevalence of Opisthorchis viverrini infection and incidence of cholangiocarcinoma in Khon Kaen, Northeast Thailand	Sriamporn S, Pisani P, Pipitgool V, Suwanrungruang K, Kamsa-ard S, Parkin DM	Tropical Medicine & International Health	2004	9	5	588	594	community	Cohort study	_x0000__x0000__x0000__x0000__x0000__x0000__x0000__x0000__x0000__x0000_	_x0000__x0000__x0000__x0000__x0000__x0000__x0000__x0000__x0000__x0000__x0000_	1996	2001	Khon Kaen	Ban Phai	_x0000__x0000__x0000__x0000__x0000__x0000__x0000__x0000__x0000__x0000__x0000__x0000__x0000__x0000__x0000__x0000__x0000__x0000__x0000__x0000__x0000__x0000__x0000__x0000__x0000__x0000__x0000__x0000__x0000__x0000__x0000__x0000__x0000__x0000__x0000__x0000__x0000__x0000__x0000__x0000__x0000__x0000__x0000__x0000__x0000__x0000__x0000__x0000__x0000__x0000__x0000__x0000__x0000__x0000__x0000__x0000__x0000_…		ADM2	16.0459	102.774	google map	Stoll's	35	69	719	237	33
438	Thailand	Prevalence of Opisthorchis viverrini infection and incidence of cholangiocarcinoma in Khon Kaen, Northeast Thailand	Sriamporn S, Pisani P, Pipitgool V, Suwanrungruang K, Kamsa-ard S, Parkin DM	Tropical Medicine & International Health	2004	9	5	588	594	community	Cohort study	_x0000__x0000__x0000__x0000__x0000__x0000__x0000__x0000__x0000__x0000_	_x0000__x0000__x0000__x0000__x0000__x0000__x0000__x0000__x0000__x0000__x0000_	1990	1995	Khon Kaen	Mancha Khiri	_x0000__x0000__x0000__x0000__x0000__x0000__x0000__x0000__x0000__x0000__x0000__x0000__x0000__x0000__x0000__x0000__x0000__x0000__x0000__x0000__x0000__x0000__x0000__x0000__x0000__x0000__x0000__x0000__x0000__x0000__x0000__x0000__x0000__x0000__x0000__x0000__x0000__x0000__x0000__x0000__x0000__x0000__x0000__x0000__x0000__x0000__x0000__x0000__x0000__x0000__x0000__x0000__x0000__x0000__x0000__x0000__x0000_…		ADM2	16.2127	102.52	google map	Stoll's	35	69	3884	809	29.3
439	Thailand	Prevalence of Opisthorchis viverrini infection and incidence of cholangiocarcinoma in Khon Kaen, Northeast Thailand	Sriamporn S, Pisani P, Pipitgool V, Suwanrungruang K, Kamsa-ard S, Parkin DM	Tropical Medicine & International Health	2004	9	5	588	594	community	Cohort study	_x0000__x0000__x0000__x0000__x0000__x0000__x0000__x0000__x0000__x0000_	_x0000__x0000__x0000__x0000__x0000__x0000__x0000__x0000__x0000__x0000__x0000_	1996	2001	Khon Kaen	Phra Yuen	_x0000__x0000__x0000__x0000__x0000__x0000__x0000__x0000__x0000__x0000__x0000__x0000__x0000__x0000__x0000__x0000__x0000__x0000__x0000__x0000__x0000__x0000__x0000__x0000__x0000__x0000__x0000__x0000__x0000__x0000__x0000__x0000__x0000__x0000__x0000__x0000__x0000__x0000__x0000__x0000__x0000__x0000__x0000__x0000__x0000__x0000__x0000__x0000__x0000__x0000__x0000__x0000__x0000__x0000__x0000__x0000__x0000_…		ADM2	16.3088	102.67	google map	Stoll's	35	69	336	53	15.77
440	Thailand	Prevalence of Opisthorchis viverrini infection and incidence of cholangiocarcinoma in Khon Kaen, Northeast Thailand	Sriamporn S, Pisani P, Pipitgool V, Suwanrungruang K, Kamsa-ard S, Parkin DM	Tropical Medicine & International Health	2004	9	5	588	594	community	Cohort study	_x0000__x0000__x0000__x0000__x0000__x0000__x0000__x0000__x0000__x0000_	_x0000__x0000__x0000__x0000__x0000__x0000__x0000__x0000__x0000__x0000__x0000_	1990	1995	Khon Kaen	Muang	_x0000__x0000__x0000__x0000__x0000__x0000__x0000__x0000__x0000__x0000__x0000__x0000__x0000__x0000__x0000__x0000__x0000__x0000__x0000__x0000__x0000__x0000__x0000__x0000__x0000__x0000__x0000__x0000__x0000__x0000__x0000__x0000__x0000__x0000__x0000__x0000__x0000__x0000__x0000__x0000__x0000__x0000__x0000__x0000__x0000__x0000__x0000__x0000__x0000__x0000__x0000__x0000__x0000__x0000__x0000__x0000__x0000_…		ADM2	16.461	102.808	google map	Stoll's	35	69	149	43	28.9
441	Thailand	Prevalence of Opisthorchis viverrini infection and incidence of cholangiocarcinoma in Khon Kaen, Northeast Thailand	Sriamporn S, Pisani P, Pipitgool V, Suwanrungruang K, Kamsa-ard S, Parkin DM	Tropical Medicine & International Health	2004	9	5	588	594	community	Cohort study	_x0000__x0000__x0000__x0000__x0000__x0000__x0000__x0000__x0000__x0000_	_x0000__x0000__x0000__x0000__x0000__x0000__x0000__x0000__x0000__x0000__x0000_	1996	2001	Khon Kaen	Muang	_x0000__x0000__x0000__x0000__x0000__x0000__x0000__x0000__x0000__x0000__x0000__x0000__x0000__x0000__x0000__x0000__x0000__x0000__x0000__x0000__x0000__x0000__x0000__x0000__x0000__x0000__x0000__x0000__x0000__x0000__x0000__x0000__x0000__x0000__x0000__x0000__x0000__x0000__x0000__x0000__x0000__x0000__x0000__x0000__x0000__x0000__x0000__x0000__x0000__x0000__x0000__x0000__x0000__x0000__x0000__x0000__x0000_…		ADM2	16.461	102.808	google map	Stoll's	35	69	1003	250	24.92
442	Thailand	Prevalence of Opisthorchis viverrini infection and incidence of cholangiocarcinoma in Khon Kaen, Northeast Thailand	Sriamporn S, Pisani P, Pipitgool V, Suwanrungruang K, Kamsa-ard S, Parkin DM	Tropical Medicine & International Health	2004	9	5	588	594	community	Cohort study	_x0000__x0000__x0000__x0000__x0000__x0000__x0000__x0000__x0000__x0000_	_x0000__x0000__x0000__x0000__x0000__x0000__x0000__x0000__x0000__x0000__x0000_	1990	1995	Khon Kean	Ban Fang	_x0000__x0000__x0000__x0000__x0000__x0000__x0000__x0000__x0000__x0000__x0000__x0000__x0000__x0000__x0000__x0000__x0000__x0000__x0000__x0000__x0000__x0000__x0000__x0000__x0000__x0000__x0000__x0000__x0000__x0000__x0000__x0000__x0000__x0000__x0000__x0000__x0000__x0000__x0000__x0000__x0000__x0000__x0000__x0000__x0000__x0000__x0000__x0000__x0000__x0000__x0000__x0000__x0000__x0000__x0000__x0000__x0000_…		ADM2	16.4919	102.618	google map	Stoll's	35	69	65	46	70.8
443	Thailand	Prevalence of Opisthorchis viverrini infection and incidence of cholangiocarcinoma in Khon Kaen, Northeast Thailand	Sriamporn S, Pisani P, Pipitgool V, Suwanrungruang K, Kamsa-ard S, Parkin DM	Tropical Medicine & International Health	2004	9	5	588	594	community	Cohort study	_x0000__x0000__x0000__x0000__x0000__x0000__x0000__x0000__x0000__x0000_	_x0000__x0000__x0000__x0000__x0000__x0000__x0000__x0000__x0000__x0000__x0000_	1996	2001	Khon Kean	Ban Fang	_x0000__x0000__x0000__x0000__x0000__x0000__x0000__x0000__x0000__x0000__x0000__x0000__x0000__x0000__x0000__x0000__x0000__x0000__x0000__x0000__x0000__x0000__x0000__x0000__x0000__x0000__x0000__x0000__x0000__x0000__x0000__x0000__x0000__x0000__x0000__x0000__x0000__x0000__x0000__x0000__x0000__x0000__x0000__x0000__x0000__x0000__x0000__x0000__x0000__x0000__x0000__x0000__x0000__x0000__x0000__x0000__x0000_…		ADM2	16.4919	102.618	google map	Stoll's	35	69	369	134	36.31
444	Thailand	Prevalence of Opisthorchis viverrini infection and incidence of cholangiocarcinoma in Khon Kaen, Northeast Thailand	Sriamporn S, Pisani P, Pipitgool V, Suwanrungruang K, Kamsa-ard S, Parkin DM	Tropical Medicine & International Health	2004	9	5	588	594	community	Cohort study	_x0000__x0000__x0000__x0000__x0000__x0000__x0000__x0000__x0000__x0000_	_x0000__x0000__x0000__x0000__x0000__x0000__x0000__x0000__x0000__x0000__x0000_	1990	1995	Khon Kaen	Nong Rua	_x0000__x0000__x0000__x0000__x0000__x0000__x0000__x0000__x0000__x0000__x0000__x0000__x0000__x0000__x0000__x0000__x0000__x0000__x0000__x0000__x0000__x0000__x0000__x0000__x0000__x0000__x0000__x0000__x0000__x0000__x0000__x0000__x0000__x0000__x0000__x0000__x0000__x0000__x0000__x0000__x0000__x0000__x0000__x0000__x0000__x0000__x0000__x0000__x0000__x0000__x0000__x0000__x0000__x0000__x0000__x0000__x0000_…		ADM2	16.4922	102.446	google map	Stoll's	35	69	128	47	36.72
445	Thailand	Prevalence of Opisthorchis viverrini infection and incidence of cholangiocarcinoma in Khon Kaen, Northeast Thailand	Sriamporn S, Pisani P, Pipitgool V, Suwanrungruang K, Kamsa-ard S, Parkin DM	Tropical Medicine & International Health	2004	9	5	588	594	community	Cohort study	_x0000__x0000__x0000__x0000__x0000__x0000__x0000__x0000__x0000__x0000_	_x0000__x0000__x0000__x0000__x0000__x0000__x0000__x0000__x0000__x0000__x0000_	1996	2001	Khon Kaen	Chum Phae	_x0000__x0000__x0000__x0000__x0000__x0000__x0000__x0000__x0000__x0000__x0000__x0000__x0000__x0000__x0000__x0000__x0000__x0000__x0000__x0000__x0000__x0000__x0000__x0000__x0000__x0000__x0000__x0000__x0000__x0000__x0000__x0000__x0000__x0000__x0000__x0000__x0000__x0000__x0000__x0000__x0000__x0000__x0000__x0000__x0000__x0000__x0000__x0000__x0000__x0000__x0000__x0000__x0000__x0000__x0000__x0000__x0000_…		ADM2	16.6164	102.096	google map	Stoll's	35	69	992	254	25.6
446	Thailand	Prevalence of Opisthorchis viverrini infection and incidence of cholangiocarcinoma in Khon Kaen, Northeast Thailand	Sriamporn S, Pisani P, Pipitgool V, Suwanrungruang K, Kamsa-ard S, Parkin DM	Tropical Medicine & International Health	2004	9	5	588	594	community	Cohort study	_x0000__x0000__x0000__x0000__x0000__x0000__x0000__x0000__x0000__x0000_	_x0000__x0000__x0000__x0000__x0000__x0000__x0000__x0000__x0000__x0000__x0000_	1990	1995	Khon Kaen	Phu Wiang	_x0000__x0000__x0000__x0000__x0000__x0000__x0000__x0000__x0000__x0000__x0000__x0000__x0000__x0000__x0000__x0000__x0000__x0000__x0000__x0000__x0000__x0000__x0000__x0000__x0000__x0000__x0000__x0000__x0000__x0000__x0000__x0000__x0000__x0000__x0000__x0000__x0000__x0000__x0000__x0000__x0000__x0000__x0000__x0000__x0000__x0000__x0000__x0000__x0000__x0000__x0000__x0000__x0000__x0000__x0000__x0000__x0000_…		ADM2	16.6695	102.465	google map	Stoll's	35	69	336	138	41.1
447	Thailand	Prevalence of Opisthorchis viverrini infection and incidence of cholangiocarcinoma in Khon Kaen, Northeast Thailand	Sriamporn S, Pisani P, Pipitgool V, Suwanrungruang K, Kamsa-ard S, Parkin DM	Tropical Medicine & International Health	2004	9	5	588	594	community	Cohort study	_x0000__x0000__x0000__x0000__x0000__x0000__x0000__x0000__x0000__x0000_	_x0000__x0000__x0000__x0000__x0000__x0000__x0000__x0000__x0000__x0000__x0000_	1990	1995	Khon Kaen	Nam Phong	_x0000__x0000__x0000__x0000__x0000__x0000__x0000__x0000__x0000__x0000__x0000__x0000__x0000__x0000__x0000__x0000__x0000__x0000__x0000__x0000__x0000__x0000__x0000__x0000__x0000__x0000__x0000__x0000__x0000__x0000__x0000__x0000__x0000__x0000__x0000__x0000__x0000__x0000__x0000__x0000__x0000__x0000__x0000__x0000__x0000__x0000__x0000__x0000__x0000__x0000__x0000__x0000__x0000__x0000__x0000__x0000__x0000_…		ADM2	16.6998	102.881	google map	Stoll's	35	69	133	31	23.3
448	Thailand	Prevalence of Opisthorchis viverrini infection and incidence of cholangiocarcinoma in Khon Kaen, Northeast Thailand	Sriamporn S, Pisani P, Pipitgool V, Suwanrungruang K, Kamsa-ard S, Parkin DM	Tropical Medicine & International Health	2004	9	5	588	594	community	Cohort study	_x0000__x0000__x0000__x0000__x0000__x0000__x0000__x0000__x0000__x0000_	_x0000__x0000__x0000__x0000__x0000__x0000__x0000__x0000__x0000__x0000__x0000_	1996	2001	Khon Kaen	Nam Phong	_x0000__x0000__x0000__x0000__x0000__x0000__x0000__x0000__x0000__x0000__x0000__x0000__x0000__x0000__x0000__x0000__x0000__x0000__x0000__x0000__x0000__x0000__x0000__x0000__x0000__x0000__x0000__x0000__x0000__x0000__x0000__x0000__x0000__x0000__x0000__x0000__x0000__x0000__x0000__x0000__x0000__x0000__x0000__x0000__x0000__x0000__x0000__x0000__x0000__x0000__x0000__x0000__x0000__x0000__x0000__x0000__x0000_…		ADM2	16.6998	102.881	google map	Stoll's	35	69	1122	160	14.3
449	Thailand	Prevalence of Opisthorchis viverrini infection and incidence of cholangiocarcinoma in Khon Kaen, Northeast Thailand	Sriamporn S, Pisani P, Pipitgool V, Suwanrungruang K, Kamsa-ard S, Parkin DM	Tropical Medicine & International Health	2004	9	5	588	594	community	Cohort study	_x0000__x0000__x0000__x0000__x0000__x0000__x0000__x0000__x0000__x0000_	_x0000__x0000__x0000__x0000__x0000__x0000__x0000__x0000__x0000__x0000__x0000_	1996	2001	Khon Kaen	Phu Pha Man	_x0000__x0000__x0000__x0000__x0000__x0000__x0000__x0000__x0000__x0000__x0000__x0000__x0000__x0000__x0000__x0000__x0000__x0000__x0000__x0000__x0000__x0000__x0000__x0000__x0000__x0000__x0000__x0000__x0000__x0000__x0000__x0000__x0000__x0000__x0000__x0000__x0000__x0000__x0000__x0000__x0000__x0000__x0000__x0000__x0000__x0000__x0000__x0000__x0000__x0000__x0000__x0000__x0000__x0000__x0000__x0000__x0000_…		ADM2	16.7191	101.872	google map	Stoll's	35	69	117	48	41
450	Thailand	Prevalence of Opisthorchis viverrini infection and incidence of cholangiocarcinoma in Khon Kaen, Northeast Thailand	Sriamporn S, Pisani P, Pipitgool V, Suwanrungruang K, Kamsa-ard S, Parkin DM	Tropical Medicine & International Health	2004	9	5	588	594	community	Cohort study	_x0000__x0000__x0000__x0000__x0000__x0000__x0000__x0000__x0000__x0000_	_x0000__x0000__x0000__x0000__x0000__x0000__x0000__x0000__x0000__x0000__x0000_	1996	2001	Khon Kaen	kranuan	_x0000__x0000__x0000__x0000__x0000__x0000__x0000__x0000__x0000__x0000__x0000__x0000__x0000__x0000__x0000__x0000__x0000__x0000__x0000__x0000__x0000__x0000__x0000__x0000__x0000__x0000__x0000__x0000__x0000__x0000__x0000__x0000__x0000__x0000__x0000__x0000__x0000__x0000__x0000__x0000__x0000__x0000__x0000__x0000__x0000__x0000__x0000__x0000__x0000__x0000__x0000__x0000__x0000__x0000__x0000__x0000__x0000_…		ADM2	16.7532	103.08	google map	Stoll's	35	69	97	2	2.1
451	Thailand	Prevalence of Opisthorchis viverrini infection and incidence of cholangiocarcinoma in Khon Kaen, Northeast Thailand	Sriamporn S, Pisani P, Pipitgool V, Suwanrungruang K, Kamsa-ard S, Parkin DM	Tropical Medicine & International Health	2004	9	5	588	594	community	Cohort study	_x0000__x0000__x0000__x0000__x0000__x0000__x0000__x0000__x0000__x0000_	_x0000__x0000__x0000__x0000__x0000__x0000__x0000__x0000__x0000__x0000__x0000_	1996	2001	Khon kaen	Si Chomphu	_x0000__x0000__x0000__x0000__x0000__x0000__x0000__x0000__x0000__x0000__x0000__x0000__x0000__x0000__x0000__x0000__x0000__x0000__x0000__x0000__x0000__x0000__x0000__x0000__x0000__x0000__x0000__x0000__x0000__x0000__x0000__x0000__x0000__x0000__x0000__x0000__x0000__x0000__x0000__x0000__x0000__x0000__x0000__x0000__x0000__x0000__x0000__x0000__x0000__x0000__x0000__x0000__x0000__x0000__x0000__x0000__x0000_…		ADM2	16.7612	102.125	google map	Stoll's	35	69	830	212	25.54
452	Thailand	Prevalence of Opisthorchis viverrini infection and incidence of cholangiocarcinoma in Khon Kaen, Northeast Thailand	Sriamporn S, Pisani P, Pipitgool V, Suwanrungruang K, Kamsa-ard S, Parkin DM	Tropical Medicine & International Health	2004	9	5	588	594	community	Cohort study	_x0000__x0000__x0000__x0000__x0000__x0000__x0000__x0000__x0000__x0000_	_x0000__x0000__x0000__x0000__x0000__x0000__x0000__x0000__x0000__x0000__x0000_	1996	2001	Khon Kaen	Ubol Ratana	_x0000__x0000__x0000__x0000__x0000__x0000__x0000__x0000__x0000__x0000__x0000__x0000__x0000__x0000__x0000__x0000__x0000__x0000__x0000__x0000__x0000__x0000__x0000__x0000__x0000__x0000__x0000__x0000__x0000__x0000__x0000__x0000__x0000__x0000__x0000__x0000__x0000__x0000__x0000__x0000__x0000__x0000__x0000__x0000__x0000__x0000__x0000__x0000__x0000__x0000__x0000__x0000__x0000__x0000__x0000__x0000__x0000_…		ADM2	16.7788	102.676	google map	Stoll's	35	69	563	102	18.1
453	Thailand	Prevalence of Opisthorchis viverrini infection and incidence of cholangiocarcinoma in Khon Kaen, Northeast Thailand	Sriamporn S, Pisani P, Pipitgool V, Suwanrungruang K, Kamsa-ard S, Parkin DM	Tropical Medicine & International Health	2004	9	5	588	594	community	Cohort study	_x0000__x0000__x0000__x0000__x0000__x0000__x0000__x0000__x0000__x0000_	_x0000__x0000__x0000__x0000__x0000__x0000__x0000__x0000__x0000__x0000__x0000_	1996	2001	Khon Kaen	Khaosuankwang	_x0000__x0000__x0000__x0000__x0000__x0000__x0000__x0000__x0000__x0000__x0000__x0000__x0000__x0000__x0000__x0000__x0000__x0000__x0000__x0000__x0000__x0000__x0000__x0000__x0000__x0000__x0000__x0000__x0000__x0000__x0000__x0000__x0000__x0000__x0000__x0000__x0000__x0000__x0000__x0000__x0000__x0000__x0000__x0000__x0000__x0000__x0000__x0000__x0000__x0000__x0000__x0000__x0000__x0000__x0000__x0000__x0000_…		ADM2	16.918	102.781	google map	Stoll's	35	69	692	142	20.5
454	Thailand	Prevalence of Opisthorchis viverrini Infection in Nakhon Ratchasima Province, Northeast Thailand	Kaewpitoon SJ, Rujirakul R, Kaewpitoon N	Asian Pacific Journal of Cancer Prevention	2012	13	10	5245	5249	community	Cross-sectional study	Oct	Sep	2010	2011	Nakhon Ratchasima	Soeng Sang	_x0000__x0000__x0000__x0000__x0000__x0000__x0000__x0000__x0000__x0000__x0000__x0000__x0000__x0000__x0000__x0000__x0000__x0000__x0000__x0000__x0000__x0000__x0000__x0000__x0000__x0000__x0000__x0000__x0000__x0000__x0000__x0000__x0000__x0000__x0000__x0000__x0000__x0000__x0000__x0000__x0000__x0000__x0000__x0000__x0000__x0000__x0000__x0000__x0000__x0000__x0000__x0000__x0000__x0000__x0000__x0000__x0000_…		ADM2	14.3532	102.487	google map	Kato-Katz	12	90	40	0	0
455	Thailand	Prevalence of Opisthorchis viverrini Infection in Nakhon Ratchasima Province, Northeast Thailand	Kaewpitoon SJ, Rujirakul R, Kaewpitoon N	Asian Pacific Journal of Cancer Prevention	2012	13	10	5245	5249	community	Cross-sectional study	Oct	Sep	2010	2011	Nakhon Ratchasima	Khon Buri	_x0000__x0000__x0000__x0000__x0000__x0000__x0000__x0000__x0000__x0000__x0000__x0000__x0000__x0000__x0000__x0000__x0000__x0000__x0000__x0000__x0000__x0000__x0000__x0000__x0000__x0000__x0000__x0000__x0000__x0000__x0000__x0000__x0000__x0000__x0000__x0000__x0000__x0000__x0000__x0000__x0000__x0000__x0000__x0000__x0000__x0000__x0000__x0000__x0000__x0000__x0000__x0000__x0000__x0000__x0000__x0000__x0000_…		ADM2	14.3777	102.218	google map	Kato-Katz	12	90	40	1	2.5
456	Thailand	Prevalence of Opisthorchis viverrini Infection in Nakhon Ratchasima Province, Northeast Thailand	Kaewpitoon SJ, Rujirakul R, Kaewpitoon N	Asian Pacific Journal of Cancer Prevention	2012	13	10	5245	5249	community	Cross-sectional study	Oct	Sep	2010	2011	Nakhon Ratchasima	Wang Nam Khiao	_x0000__x0000__x0000__x0000__x0000__x0000__x0000__x0000__x0000__x0000__x0000__x0000__x0000__x0000__x0000__x0000__x0000__x0000__x0000__x0000__x0000__x0000__x0000__x0000__x0000__x0000__x0000__x0000__x0000__x0000__x0000__x0000__x0000__x0000__x0000__x0000__x0000__x0000__x0000__x0000__x0000__x0000__x0000__x0000__x0000__x0000__x0000__x0000__x0000__x0000__x0000__x0000__x0000__x0000__x0000__x0000__x0000_…		ADM2	14.4491	101.855	google map	Kato-Katz	12	90	36	0	0
457	Thailand	Prevalence of Opisthorchis viverrini Infection in Nakhon Ratchasima Province, Northeast Thailand	Kaewpitoon SJ, Rujirakul R, Kaewpitoon N	Asian Pacific Journal of Cancer Prevention	2012	13	10	5245	5249	community	Cross-sectional study	Oct	Sep	2010	2011	Nakhon Ratchasima	Pak Chong	_x0000__x0000__x0000__x0000__x0000__x0000__x0000__x0000__x0000__x0000__x0000__x0000__x0000__x0000__x0000__x0000__x0000__x0000__x0000__x0000__x0000__x0000__x0000__x0000__x0000__x0000__x0000__x0000__x0000__x0000__x0000__x0000__x0000__x0000__x0000__x0000__x0000__x0000__x0000__x0000__x0000__x0000__x0000__x0000__x0000__x0000__x0000__x0000__x0000__x0000__x0000__x0000__x0000__x0000__x0000__x0000__x0000_…		ADM2	14.6192	101.448	google map	Kato-Katz	12	90	36	0	0
458	Thailand	Prevalence of Opisthorchis viverrini Infection in Nakhon Ratchasima Province, Northeast Thailand	Kaewpitoon SJ, Rujirakul R, Kaewpitoon N	Asian Pacific Journal of Cancer Prevention	2012	13	10	5245	5249	community	Cross-sectional study	Oct	Sep	2010	2011	Nakhon Ratchasima	Pak Thong Chai	_x0000__x0000__x0000__x0000__x0000__x0000__x0000__x0000__x0000__x0000__x0000__x0000__x0000__x0000__x0000__x0000__x0000__x0000__x0000__x0000__x0000__x0000__x0000__x0000__x0000__x0000__x0000__x0000__x0000__x0000__x0000__x0000__x0000__x0000__x0000__x0000__x0000__x0000__x0000__x0000__x0000__x0000__x0000__x0000__x0000__x0000__x0000__x0000__x0000__x0000__x0000__x0000__x0000__x0000__x0000__x0000__x0000_…		ADM2	14.6641	101.939	google map	Kato-Katz	12	90	40	0	0
459	Thailand	Prevalence of Opisthorchis viverrini Infection in Nakhon Ratchasima Province, Northeast Thailand	Kaewpitoon SJ, Rujirakul R, Kaewpitoon N	Asian Pacific Journal of Cancer Prevention	2012	13	10	5245	5249	community	Cross-sectional study	Oct	Sep	2010	2011	Nakhon Ratchasima	Nong Bun Mak	_x0000__x0000__x0000__x0000__x0000__x0000__x0000__x0000__x0000__x0000__x0000__x0000__x0000__x0000__x0000__x0000__x0000__x0000__x0000__x0000__x0000__x0000__x0000__x0000__x0000__x0000__x0000__x0000__x0000__x0000__x0000__x0000__x0000__x0000__x0000__x0000__x0000__x0000__x0000__x0000__x0000__x0000__x0000__x0000__x0000__x0000__x0000__x0000__x0000__x0000__x0000__x0000__x0000__x0000__x0000__x0000__x0000_…		ADM2	14.713	102.373	google map	Kato-Katz	12	90	36	0	0
460	Thailand	Prevalence of Opisthorchis viverrini Infection in Nakhon Ratchasima Province, Northeast Thailand	Kaewpitoon SJ, Rujirakul R, Kaewpitoon N	Asian Pacific Journal of Cancer Prevention	2012	13	10	5245	5249	community	Cross-sectional study	Oct	Sep	2010	2011	Nakhon Ratchasima	Chok Chai	_x0000__x0000__x0000__x0000__x0000__x0000__x0000__x0000__x0000__x0000__x0000__x0000__x0000__x0000__x0000__x0000__x0000__x0000__x0000__x0000__x0000__x0000__x0000__x0000__x0000__x0000__x0000__x0000__x0000__x0000__x0000__x0000__x0000__x0000__x0000__x0000__x0000__x0000__x0000__x0000__x0000__x0000__x0000__x0000__x0000__x0000__x0000__x0000__x0000__x0000__x0000__x0000__x0000__x0000__x0000__x0000__x0000_…		ADM2	14.759	102.204	google map	Kato-Katz	12	90	36	0	0
461	Thailand	Prevalence of Opisthorchis viverrini Infection in Nakhon Ratchasima Province, Northeast Thailand	Kaewpitoon SJ, Rujirakul R, Kaewpitoon N	Asian Pacific Journal of Cancer Prevention	2012	13	10	5245	5249	community	Cross-sectional study	Oct	Sep	2010	2011	Nakhon Ratchasima	Sung Noen	_x0000__x0000__x0000__x0000__x0000__x0000__x0000__x0000__x0000__x0000__x0000__x0000__x0000__x0000__x0000__x0000__x0000__x0000__x0000__x0000__x0000__x0000__x0000__x0000__x0000__x0000__x0000__x0000__x0000__x0000__x0000__x0000__x0000__x0000__x0000__x0000__x0000__x0000__x0000__x0000__x0000__x0000__x0000__x0000__x0000__x0000__x0000__x0000__x0000__x0000__x0000__x0000__x0000__x0000__x0000__x0000__x0000_…		ADM2	14.8566	101.83	google map	Kato-Katz	12	90	36	0	0
462	Thailand	Prevalence of Opisthorchis viverrini Infection in Nakhon Ratchasima Province, Northeast Thailand	Kaewpitoon SJ, Rujirakul R, Kaewpitoon N	Asian Pacific Journal of Cancer Prevention	2012	13	10	5245	5249	community	Cross-sectional study	Oct	Sep	2010	2011	Nakhon Ratchasima	Sikhio	_x0000__x0000__x0000__x0000__x0000__x0000__x0000__x0000__x0000__x0000__x0000__x0000__x0000__x0000__x0000__x0000__x0000__x0000__x0000__x0000__x0000__x0000__x0000__x0000__x0000__x0000__x0000__x0000__x0000__x0000__x0000__x0000__x0000__x0000__x0000__x0000__x0000__x0000__x0000__x0000__x0000__x0000__x0000__x0000__x0000__x0000__x0000__x0000__x0000__x0000__x0000__x0000__x0000__x0000__x0000__x0000__x0000_…		ADM2	14.9403	101.603	google map	Kato-Katz	12	90	36	0	0
463	Thailand	Prevalence of Opisthorchis viverrini Infection in Nakhon Ratchasima Province, Northeast Thailand	Kaewpitoon SJ, Rujirakul R, Kaewpitoon N	Asian Pacific Journal of Cancer Prevention	2012	13	10	5245	5249	community	Cross-sectional study	Oct	Sep	2010	2011	Nakhon Ratchasima	Chakkarat	_x0000__x0000__x0000__x0000__x0000__x0000__x0000__x0000__x0000__x0000__x0000__x0000__x0000__x0000__x0000__x0000__x0000__x0000__x0000__x0000__x0000__x0000__x0000__x0000__x0000__x0000__x0000__x0000__x0000__x0000__x0000__x0000__x0000__x0000__x0000__x0000__x0000__x0000__x0000__x0000__x0000__x0000__x0000__x0000__x0000__x0000__x0000__x0000__x0000__x0000__x0000__x0000__x0000__x0000__x0000__x0000__x0000_…		ADM2	14.9517	102.437	google map	Kato-Katz	12	90	36	1	2.78
464	Thailand	Prevalence of Opisthorchis viverrini Infection in Nakhon Ratchasima Province, Northeast Thailand	Kaewpitoon SJ, Rujirakul R, Kaewpitoon N	Asian Pacific Journal of Cancer Prevention	2012	13	10	5245	5249	community	Cross-sectional study	Oct	Sep	2010	2011	Nakhon Ratchasima	Mueang Nakhon Ratchasima	_x0000__x0000__x0000__x0000__x0000__x0000__x0000__x0000__x0000__x0000__x0000__x0000__x0000__x0000__x0000__x0000__x0000__x0000__x0000__x0000__x0000__x0000__x0000__x0000__x0000__x0000__x0000__x0000__x0000__x0000__x0000__x0000__x0000__x0000__x0000__x0000__x0000__x0000__x0000__x0000__x0000__x0000__x0000__x0000__x0000__x0000__x0000__x0000__x0000__x0000__x0000__x0000__x0000__x0000__x0000__x0000__x0000_…		ADM2	14.9692	102.096	google map	Kato-Katz	12	90	40	1	2.5
465	Thailand	Prevalence of Opisthorchis viverrini Infection in Nakhon Ratchasima Province, Northeast Thailand	Kaewpitoon SJ, Rujirakul R, Kaewpitoon N	Asian Pacific Journal of Cancer Prevention	2012	13	10	5245	5249	community	Cross-sectional study	Oct	Sep	2010	2011	Nakhon Ratchasima	Chaloem Phra Kiat	_x0000__x0000__x0000__x0000__x0000__x0000__x0000__x0000__x0000__x0000__x0000__x0000__x0000__x0000__x0000__x0000__x0000__x0000__x0000__x0000__x0000__x0000__x0000__x0000__x0000__x0000__x0000__x0000__x0000__x0000__x0000__x0000__x0000__x0000__x0000__x0000__x0000__x0000__x0000__x0000__x0000__x0000__x0000__x0000__x0000__x0000__x0000__x0000__x0000__x0000__x0000__x0000__x0000__x0000__x0000__x0000__x0000_…		ADM2	14.9754	102.287	google map	Kato-Katz	12	90	36	1	2.78
[truncated: 624 more rows]

## Sheet: Variable Declaration
Column Number	Variable Name	Explanation of variables
1	DataID	IDs of data
2	Country	The country where the survey was conducted
3	Title	Title of paper
[truncated: 35 more rows]
