# Supplementary material for: Model-based spatial-temporal mapping of opisthorchiasis in endemic countries of Southeast Asia
Source: eLife. 2021 Jan 12;10:e59755. doi: 10.7554/eLife.59755 (PMC7870142; doi:10.7554/eLife.59755)
Supplement: Figure 3—source data 1. [file elife-59755-fig3-data1.xlsx]

## Sheet: Median predicted prevalence
Longitude	Latitude	Median predicted prevalence of 1978	Median predicted prevalence of 1983	Median predicted prevalence of 1988	Median predicted prevalence of 1993	Median predicted prevalence of 1998	Median predicted prevalence of 2003	Median predicted prevalence of 2008	Median predicted prevalence of 2013	Median predicted prevalence of 2018
100.021	12.8958	0.102766	0.0909066	0.101438	0.115026	0.0940656	0.0319864	0.0086087	0.00653122	0.00712854
100.021	12.9375	0.119947	0.111514	0.120033	0.140806	0.119054	0.0403217	0.0100447	0.0066929	0.00727061
100.021	12.9792	0.125515	0.102342	0.120748	0.141945	0.127931	0.0420662	0.0102658	0.00727947	0.00865548
100.021	13.0208	0.103991	0.0862966	0.0965215	0.11682	0.108416	0.0360554	0.00978168	0.00640092	0.00768741
100.021	13.0625	0.116279	0.095309	0.112797	0.143161	0.123136	0.0444813	0.0103791	0.00741438	0.00952969
100.021	13.1042	0.113796	0.0877359	0.099795	0.136933	0.133287	0.0456595	0.00975782	0.00670059	0.00879091
100.021	13.1458	0.120389	0.0810726	0.0908205	0.136593	0.135942	0.0432878	0.00876417	0.00717593	0.0077763
100.021	13.3958	0.117788	0.0767538	0.0761052	0.131014	0.132883	0.0303775	0.00526515	0.00619409	0.00799608
100.021	13.4375	0.126415	0.081722	0.0765919	0.133977	0.130408	0.0272916	0.00507519	0.00617199	0.00790693
100.021	13.4792	0.123529	0.0694148	0.0705399	0.120672	0.114091	0.0246964	0.00485112	0.00575155	0.00770401
100.021	13.5208	0.120026	0.0703232	0.0667052	0.122014	0.106092	0.0214743	0.00494595	0.00656384	0.00816462
100.021	13.5625	0.15118	0.0872473	0.0852676	0.158604	0.118405	0.0269223	0.00681822	0.0094171	0.0111026
100.021	13.6042	0.156272	0.0874255	0.0824823	0.144509	0.117562	0.0240258	0.00662988	0.0101431	0.0110698
100.021	13.6458	0.148276	0.0825588	0.0898138	0.145482	0.113517	0.024877	0.00656717	0.0108061	0.0118368
100.021	13.6875	0.122868	0.0717529	0.0778554	0.13321	0.0970033	0.0194452	0.00501089	0.00879447	0.00894668
100.021	13.7292	0.116857	0.0732805	0.0775164	0.128127	0.0932257	0.0210264	0.0056561	0.00824366	0.00934092
100.021	13.7708	0.106631	0.0688165	0.0714097	0.118994	0.0896726	0.0182488	0.0056877	0.00696183	0.00759567
100.021	13.8125	0.102659	0.0590659	0.0636893	0.109564	0.0885645	0.0183643	0.00568881	0.00749277	0.00691911
100.021	13.8542	0.101188	0.0586543	0.0663078	0.116793	0.101296	0.0228072	0.00691222	0.00764935	0.00703051
100.021	13.8958	0.118249	0.0685036	0.0726896	0.137304	0.131998	0.0271756	0.00871831	0.00886713	0.00689445
100.021	13.9375	0.122568	0.0711956	0.0726409	0.152477	0.132	0.0271722	0.00980759	0.00935935	0.00605001
100.021	13.9792	0.136601	0.0790671	0.0889334	0.175309	0.155733	0.033218	0.0123842	0.0106894	0.00651871
100.021	14.0208	0.115585	0.071035	0.0772028	0.146106	0.121877	0.0334219	0.012682	0.00864407	0.00528256
100.021	14.0625	0.0903828	0.05628	0.0645765	0.114791	0.104034	0.0311993	0.011978	0.007219	0.00396918
100.021	14.1042	0.0893797	0.0582841	0.070626	0.119895	0.100849	0.0370076	0.0142495	0.00777862	0.00391601
100.021	14.1458	0.0883789	0.0592403	0.069709	0.108835	0.0929499	0.0411026	0.0178121	0.00755118	0.00332229
100.021	14.1875	0.0796473	0.0591531	0.0688142	0.0969089	0.0864529	0.040902	0.0203212	0.00659528	0.00281536
100.021	14.2292	0.0773885	0.0536665	0.0621512	0.0850382	0.0786277	0.0456521	0.021071	0.00722067	0.00286901
100.021	14.2708	0.0799526	0.0580843	0.0659632	0.0876142	0.0773825	0.0479147	0.0267747	0.00805831	0.00298403
100.021	14.3125	0.0824111	0.0654658	0.069833	0.0912717	0.0825735	0.0522062	0.0337747	0.00923761	0.00348526
100.021	14.3542	0.0900697	0.068726	0.0689721	0.0958986	0.0843701	0.0549163	0.0411166	0.0103534	0.00377914
100.021	14.3958	0.0907358	0.0641952	0.0679041	0.0890408	0.082924	0.0641701	0.0469286	0.0112008	0.00377428
100.021	14.4375	0.082368	0.0635174	0.0660992	0.089169	0.0797515	0.0661733	0.0466497	0.0106397	0.0037437
100.021	14.4792	0.0965599	0.0798156	0.0804007	0.110729	0.100663	0.0804115	0.0564608	0.0132084	0.00407219
100.021	14.5208	0.0958945	0.0784609	0.0807273	0.108081	0.0963846	0.0806748	0.0571084	0.0127511	0.00374945
100.021	14.5625	0.112869	0.0866904	0.08544	0.122129	0.111717	0.0919351	0.0716364	0.0147369	0.00419443
100.021	14.6042	0.101302	0.0809808	0.0846429	0.122218	0.110131	0.0891957	0.0648182	0.0130917	0.00348082
100.021	14.6458	0.0874842	0.0827613	0.0741812	0.110974	0.108188	0.0814924	0.0603194	0.0108759	0.00290508
100.021	14.6875	0.10102	0.0925431	0.0847749	0.11982	0.111328	0.0864864	0.0554316	0.0103521	0.00284398
100.021	14.7292	0.101412	0.0881436	0.0833743	0.116348	0.107297	0.0775291	0.0462133	0.00888328	0.00261492
100.021	14.7708	0.102324	0.0849797	0.0705102	0.106217	0.0973298	0.0697216	0.0393659	0.00760182	0.00238218
100.021	14.8125	0.101183	0.0792085	0.0719911	0.0987469	0.100322	0.0630041	0.0375024	0.00710557	0.00222253
100.021	14.8542	0.0991101	0.0797008	0.0703303	0.0904264	0.0915657	0.0553402	0.0295202	0.00648042	0.00200997
100.021	14.8958	0.0933266	0.0789784	0.0668798	0.0972165	0.0917174	0.0551178	0.0281323	0.00606019	0.00202471
100.021	14.9375	0.0759482	0.0621914	0.0546006	0.0873076	0.0763995	0.0422149	0.0208664	0.00461852	0.00180201
100.021	14.9792	0.0873784	0.0793681	0.0743532	0.110492	0.0994538	0.0485239	0.025847	0.00540113	0.00226309
100.021	15.0208	0.076988	0.0695856	0.0654655	0.10067	0.089874	0.0422266	0.0216618	0.00531402	0.00211992
100.021	15.0625	0.0845429	0.0720498	0.0658985	0.127081	0.0977216	0.0429326	0.0243162	0.00661585	0.00269613
100.021	15.1042	0.097107	0.0803475	0.0674704	0.138498	0.105347	0.0474833	0.0278097	0.00813262	0.00364614
100.021	15.1458	0.0950906	0.081239	0.0761227	0.164027	0.122983	0.0518634	0.0353791	0.0121372	0.00582924
100.021	15.1875	0.126531	0.109245	0.0969748	0.23362	0.191772	0.0826903	0.0641401	0.0276907	0.0131079
100.021	15.2292	0.132852	0.110593	0.107107	0.24286	0.230334	0.100767	0.0853882	0.0439	0.0259495
100.021	15.2708	0.134873	0.113388	0.117222	0.257998	0.241884	0.126323	0.134449	0.087941	0.0609025
100.021	15.3125	0.143555	0.116323	0.125663	0.300723	0.274353	0.157825	0.201945	0.15616	0.129979
100.021	15.3542	0.154025	0.122127	0.12649	0.319579	0.301125	0.202178	0.264902	0.238511	0.228068
100.021	15.3958	0.123307	0.0960307	0.101972	0.282225	0.27818	0.178	0.275994	0.284667	0.274752
100.021	15.4375	0.137025	0.109291	0.117021	0.332051	0.306023	0.217766	0.307412	0.350868	0.342964
100.021	15.4792	0.130909	0.0995834	0.117139	0.3346	0.325927	0.224405	0.350591	0.39037	0.394957
100.021	15.5208	0.126111	0.0898652	0.111977	0.329398	0.318899	0.221018	0.324628	0.354385	0.33563
100.021	15.5625	0.157389	0.129758	0.146543	0.413115	0.404853	0.287768	0.401645	0.43095	0.422394
100.021	15.6042	0.138213	0.100407	0.111045	0.377787	0.369366	0.258586	0.352304	0.392037	0.343602
100.021	15.6458	0.205498	0.132773	0.149371	0.43045	0.437237	0.303778	0.436093	0.447971	0.393135
100.021	15.6875	0.206853	0.130809	0.131985	0.360532	0.353472	0.25911	0.340397	0.334395	0.308367
100.021	15.7292	0.256563	0.161542	0.152583	0.339976	0.329753	0.245101	0.300602	0.279508	0.23174
100.021	15.7708	0.272546	0.172272	0.151417	0.284413	0.293925	0.202476	0.243916	0.19965	0.156243
100.021	15.8125	0.391983	0.25539	0.217521	0.332042	0.318645	0.245166	0.250152	0.201988	0.169298
100.021	15.8542	0.445472	0.298332	0.235053	0.324596	0.296422	0.25852	0.245166	0.175453	0.144189
100.021	15.8958	0.335059	0.220615	0.178399	0.238807	0.226078	0.218889	0.187808	0.134371	0.0986076
100.021	15.9375	0.323557	0.213783	0.183438	0.224116	0.210429	0.241724	0.189837	0.143688	0.106397
100.021	15.9792	0.386084	0.27686	0.218564	0.231632	0.240796	0.279987	0.239041	0.163286	0.134509
100.021	16.0208	0.359756	0.242393	0.191497	0.200623	0.211964	0.304685	0.233347	0.155228	0.121569
100.021	16.0625	0.32716	0.225891	0.180633	0.163307	0.197824	0.312121	0.235967	0.146666	0.116728
100.021	16.1042	0.295171	0.191751	0.162255	0.145759	0.177079	0.302329	0.227656	0.129916	0.112623
100.021	16.1458	0.216887	0.145187	0.137456	0.118071	0.146432	0.311397	0.228649	0.122307	0.102431
100.021	16.1875	0.0826184	0.0596614	0.0752771	0.0764339	0.110604	0.254488	0.191224	0.110313	0.0922326
100.021	16.2292	0.0220228	0.0194434	0.0358355	0.0368802	0.067374	0.17897	0.126651	0.0779815	0.070077
100.021	16.2708	0.0160366	0.0149454	0.0266983	0.0321633	0.0589974	0.175563	0.112824	0.0750151	0.0638302
100.021	16.3125	0.0148922	0.0121636	0.0255072	0.0280208	0.0547057	0.197133	0.107498	0.0743614	0.0647437
100.021	16.3542	0.0211753	0.0163939	0.0359179	0.0269371	0.0584584	0.199223	0.107929	0.071497	0.0681087
100.021	16.3958	0.0517543	0.0352949	0.0579356	0.0379425	0.0706724	0.22053	0.123589	0.0807287	0.0751555
100.021	16.4375	0.112486	0.0689334	0.0838252	0.0522145	0.0839382	0.237693	0.127388	0.0831931	0.0749913
100.021	16.4792	0.141319	0.0901722	0.112371	0.0640173	0.0848684	0.251111	0.114944	0.0687075	0.0664644
100.021	16.5208	0.190475	0.127348	0.143063	0.0773629	0.0913838	0.256009	0.125101	0.0621691	0.0557216
100.021	16.5625	0.230859	0.16251	0.165457	0.0862979	0.106008	0.270812	0.122108	0.0593971	0.0428809
100.021	16.6042	0.253872	0.181513	0.182662	0.101553	0.114752	0.261638	0.115479	0.0475793	0.0341536
100.021	16.6458	0.275275	0.197949	0.188082	0.102737	0.11677	0.246922	0.0992199	0.0388105	0.0269488
100.021	16.6875	0.298148	0.230008	0.188286	0.11632	0.123916	0.234558	0.0935544	0.0293346	0.0194675
100.021	16.7292	0.261617	0.217857	0.220639	0.136764	0.151191	0.270911	0.107719	0.0328495	0.0230029
100.021	16.7708	0.315194	0.263584	0.266169	0.166127	0.178429	0.27552	0.0992356	0.0300387	0.0192233
100.021	16.8125	0.386763	0.339584	0.306396	0.1825	0.182677	0.27292	0.090519	0.0259512	0.015696
100.021	16.8542	0.370128	0.315863	0.305302	0.169475	0.1684	0.219902	0.0690315	0.0183357	0.0103743
100.021	16.8958	0.407545	0.346149	0.344247	0.180874	0.184414	0.233168	0.0689804	0.0166824	0.00899618
100.021	16.9375	0.48141	0.428356	0.433297	0.257797	0.231542	0.290632	0.0752741	0.0186909	0.00857277
100.021	16.9792	0.49579	0.444994	0.483758	0.29676	0.247282	0.293053	0.0753323	0.0160376	0.00704988
100.021	17.0208	0.449313	0.441129	0.500976	0.294819	0.284276	0.300495	0.0735814	0.0126849	0.00598726
100.021	17.0625	0.364301	0.37628	0.462727	0.303723	0.263321	0.281922	0.0694669	0.0113529	0.00478216
100.021	17.1042	0.306452	0.329266	0.438053	0.297291	0.255695	0.249494	0.0596777	0.0096755	0.00431706
100.021	17.1458	0.257881	0.300868	0.441871	0.288201	0.245234	0.263362	0.060636	0.00965362	0.00425344
100.021	17.1875	0.205968	0.261616	0.40478	0.27781	0.228558	0.255527	0.0537984	0.00764664	0.00359843
100.021	17.2292	0.16747	0.205583	0.375405	0.2562	0.218293	0.240756	0.0459976	0.0061597	0.00288625
100.021	17.2708	0.116643	0.190842	0.340276	0.241438	0.230943	0.226379	0.0443608	0.00579834	0.00241164
100.021	17.3125	0.0909105	0.136768	0.298833	0.226538	0.213064	0.217866	0.0401382	0.00557889	0.00220669
100.021	17.3542	0.065918	0.112147	0.246654	0.194677	0.186674	0.18775	0.0377079	0.00505269	0.00206173
100.021	17.3958	0.0538193	0.0981235	0.225488	0.181763	0.180168	0.192029	0.0361538	0.00462042	0.00205337
100.021	17.4375	0.042284	0.080648	0.205552	0.179456	0.179218	0.188657	0.0363064	0.00448958	0.0018094
100.021	17.4792	0.0439399	0.0758697	0.213701	0.172	0.174973	0.186647	0.0382739	0.00500054	0.00208241
100.021	17.5208	0.0477081	0.0883356	0.214672	0.181912	0.182499	0.195769	0.0462412	0.00597878	0.00288338
100.021	17.5625	0.0485606	0.0944288	0.222214	0.180241	0.196341	0.194222	0.0499999	0.00734085	0.00363359
100.021	17.6042	0.0383472	0.0748861	0.183121	0.148615	0.162889	0.175834	0.0475208	0.00712904	0.00352751
100.021	17.6458	0.0403718	0.0878448	0.195698	0.174707	0.172039	0.199015	0.0586905	0.00993313	0.00478307
100.021	17.6875	0.0385241	0.0734881	0.174483	0.161284	0.163032	0.194559	0.0508986	0.00912413	0.00510976
100.021	17.7292	0.0320676	0.0622119	0.167305	0.133686	0.12374	0.179365	0.0475228	0.0102516	0.00571136
100.021	17.7708	0.0299355	0.0571619	0.141113	0.109791	0.101782	0.147402	0.0422327	0.0118781	0.00594451
100.021	17.8125	0.0330886	0.0568832	0.141507	0.106291	0.109401	0.154059	0.0539309	0.0168345	0.00812556
100.021	17.8542	0.0381604	0.0562951	0.144467	0.10851	0.112346	0.15987	0.0617595	0.0219129	0.0129567
100.021	17.8958	0.0422512	0.0624942	0.141039	0.115464	0.117183	0.171346	0.0811506	0.0284697	0.0180043
100.021	17.9375	0.0480856	0.0639844	0.1534	0.107589	0.122902	0.182887	0.0983131	0.0338862	0.0236003
100.021	17.9792	0.0694577	0.0985189	0.223295	0.168095	0.188707	0.261192	0.158756	0.0630193	0.0475374
100.021	18.0208	0.0733908	0.0926069	0.21315	0.155577	0.162784	0.231755	0.13246	0.0635416	0.050261
100.021	18.0625	0.0581129	0.0841712	0.195522	0.142506	0.136805	0.218423	0.131377	0.0637884	0.0483219
100.021	18.1042	0.0543018	0.0846654	0.192365	0.136521	0.12656	0.214384	0.132106	0.0738274	0.0581258
100.021	18.1458	0.0654475	0.0975743	0.187449	0.137171	0.146413	0.250425	0.156518	0.0839278	0.0752702
100.021	18.1875	0.0739346	0.106794	0.221115	0.14465	0.159086	0.265326	0.160519	0.10221	0.0883336
100.021	18.2292	0.0744757	0.110432	0.233131	0.145274	0.149632	0.251885	0.163322	0.108972	0.0972647
100.021	18.2708	0.111934	0.149219	0.282449	0.188957	0.196552	0.309091	0.203476	0.141353	0.152075
100.021	18.3125	0.0759853	0.102977	0.196923	0.124395	0.133965	0.239174	0.135035	0.103906	0.110284
100.021	18.3542	0.0758364	0.102326	0.191642	0.121899	0.125019	0.231853	0.129156	0.112284	0.113868
100.021	18.3958	0.0744397	0.0979692	0.170761	0.116856	0.117362	0.215783	0.128307	0.103731	0.125609
100.021	18.4375	0.0706685	0.102707	0.161027	0.110775	0.119494	0.213377	0.125317	0.106731	0.144135
100.021	18.4792	0.0699206	0.0918582	0.15653	0.0979466	0.104708	0.213046	0.114948	0.112757	0.147186
100.021	18.5208	0.0624965	0.0831647	0.149136	0.0847579	0.0942423	0.172239	0.0886228	0.0971723	0.121367
100.021	18.5625	0.0619409	0.0850778	0.138936	0.0773429	0.0960333	0.172445	0.0741261	0.0863554	0.110769
100.021	18.6042	0.0631763	0.0815328	0.13334	0.0721744	0.0952793	0.164095	0.0718921	0.0814257	0.119223
100.021	18.6458	0.0573139	0.0854352	0.11536	0.0604091	0.0840521	0.16018	0.063304	0.0731075	0.110998
100.021	18.6875	0.0636988	0.0826664	0.118004	0.0603228	0.080871	0.153001	0.0661995	0.0654002	0.096994
100.021	18.7292	0.0752684	0.106237	0.158243	0.0740404	0.099831	0.169226	0.070384	0.0695089	0.11835
100.021	18.7708	0.0662446	0.0870544	0.150727	0.0710636	0.0807988	0.158436	0.0603185	0.0590492	0.105107
100.021	18.8125	0.060723	0.0753482	0.137395	0.058202	0.0667989	0.133617	0.0503979	0.0476519	0.0711312
100.021	18.8542	0.0657866	0.0895962	0.145687	0.0600981	0.0650865	0.136941	0.0524179	0.0474007	0.0761845
100.021	18.8958	0.071168	0.0973323	0.142453	0.0518811	0.0675116	0.139712	0.0523741	0.0446704	0.0741578
100.021	18.9375	0.0749166	0.0954755	0.146157	0.0509166	0.0774801	0.161953	0.0525314	0.0462964	0.0755669
100.021	18.9792	0.0705406	0.102214	0.153645	0.0557135	0.0780055	0.161713	0.050899	0.0470278	0.0677116
100.021	19.0208	0.08678	0.127976	0.177596	0.0628945	0.0859638	0.189498	0.0717386	0.0579964	0.0767742
100.021	19.0625	0.0847798	0.126464	0.178104	0.0668713	0.0854404	0.194134	0.0780749	0.0593734	0.0863678
100.021	19.1042	0.0941071	0.12957	0.184268	0.0709322	0.0890598	0.202842	0.0939204	0.0672014	0.0844868
100.021	19.1458	0.0891127	0.127232	0.180346	0.0672561	0.0891333	0.203659	0.10025	0.0767119	0.0891851
100.021	19.1875	0.088602	0.127374	0.181936	0.0662963	0.0865087	0.226777	0.111224	0.0789271	0.0930444
100.021	19.2292	0.104613	0.134216	0.211854	0.0770538	0.103942	0.26461	0.145322	0.103739	0.115129
100.021	19.2708	0.105089	0.137148	0.221331	0.0866171	0.107669	0.292456	0.182546	0.129306	0.128085
100.021	19.3125	0.107794	0.147022	0.24205	0.106163	0.128064	0.317815	0.211408	0.148764	0.135332
100.021	19.3542	0.072363	0.121684	0.199686	0.0890344	0.106761	0.298789	0.198635	0.138586	0.114866
100.021	19.3958	0.0769522	0.122168	0.207603	0.0912529	0.114459	0.312967	0.2172	0.142535	0.115323
100.021	19.4375	0.0785358	0.126454	0.202519	0.101286	0.125127	0.329263	0.234193	0.156811	0.138211
100.021	19.4792	0.0897161	0.119528	0.211976	0.109867	0.125455	0.333014	0.228755	0.160593	0.138865
100.021	19.5208	0.0876542	0.120351	0.19493	0.0966483	0.128999	0.338374	0.216919	0.16503	0.140402
100.021	19.5625	0.0953139	0.117601	0.215634	0.0961219	0.13442	0.366616	0.241433	0.172408	0.13854
100.021	19.6042	0.0946682	0.121167	0.213657	0.114616	0.151172	0.391084	0.256844	0.181046	0.15666
100.021	19.6458	0.0959	0.128657	0.206507	0.125691	0.158335	0.389737	0.256872	0.183015	0.156706
100.021	19.6875	0.0984152	0.137604	0.205046	0.119669	0.162628	0.388356	0.26548	0.174818	0.134503
100.021	19.7292	0.0975027	0.136636	0.206214	0.122723	0.168003	0.380876	0.261142	0.158083	0.113306
100.021	19.7708	0.0878181	0.124435	0.200324	0.125678	0.170846	0.394311	0.263973	0.146094	0.103983
100.021	19.8125	0.0910745	0.138994	0.208971	0.137116	0.179763	0.430029	0.267003	0.140862	0.0891375
100.021	19.8542	0.0968745	0.141893	0.213461	0.132874	0.182397	0.438902	0.274607	0.130655	0.085128
100.021	19.8958	0.108244	0.133154	0.21641	0.140549	0.185398	0.452421	0.276849	0.135002	0.0965072
100.021	19.9375	0.104419	0.137649	0.217087	0.14412	0.19562	0.465147	0.271345	0.137983	0.0927485
100.021	19.9792	0.0946265	0.134906	0.21552	0.149467	0.202762	0.444899	0.27972	0.14598	0.108878
100.021	20.0208	0.0921892	0.125901	0.204083	0.14842	0.196251	0.439633	0.27668	0.148483	0.107612
100.021	20.0625	0.0835255	0.112481	0.186498	0.133469	0.175025	0.429717	0.280533	0.139417	0.108541
100.021	20.1042	0.080168	0.10835	0.177774	0.129068	0.169888	0.385468	0.248466	0.12275	0.084457
100.021	20.1458	0.0702809	0.10013	0.187219	0.117852	0.155256	0.311572	0.202321	0.0980395	0.0719461
100.021	20.1875	0.0645253	0.0888838	0.148382	0.110068	0.132501	0.249309	0.150468	0.0754296	0.0614116
100.021	20.2292	0.0639394	0.0869112	0.146895	0.0944894	0.11592	0.197727	0.125549	0.0610315	0.0524919
100.021	20.2708	0.0564816	0.0768736	0.123294	0.0825214	0.0990205	0.168593	0.0971689	0.0514203	0.0423292
100.021	20.3125	0.0498025	0.0688416	0.11809	0.0807836	0.0944979	0.137487	0.0868801	0.0453288	0.0318962
100.021	20.3542	0.0517811	0.0669246	0.101942	0.0720298	0.0888881	0.141026	0.0772837	0.0441158	0.0321589
100.021	20.3958	0.0541124	0.0656857	0.0863358	0.0608107	0.0746494	0.117337	0.0605206	0.0342703	0.0275435
100.021	6.5625	0.0331272	0.0231036	0.0206575	0.0241282	0.0138548	0.0132083	0.0131899	0.0107518	0.00938946
100.021	6.60417	0.0342771	0.0224087	0.0199856	0.0228187	0.0128704	0.0108252	0.0114878	0.009595	0.0077556
100.021	6.64583	0.0298102	0.0219588	0.0197939	0.0236809	0.0114281	0.0101406	0.00975348	0.00794506	0.00688493
100.021	6.6875	0.027335	0.0185147	0.016511	0.0188393	0.008297	0.00616707	0.00672338	0.00553521	0.00489007
100.021	6.72917	0.0261747	0.0182687	0.0167661	0.0177544	0.00802449	0.00549024	0.00582485	0.00496984	0.00405181
100.021	6.77083	0.027904	0.0210334	0.019999	0.0210358	0.00834966	0.0057775	0.0064782	0.00528383	0.00447599
100.021	6.8125	0.0313736	0.0208027	0.0199066	0.0218972	0.00886652	0.00562719	0.00666866	0.00577498	0.00479111
100.021	6.85417	0.0328457	0.02164	0.0204394	0.0211803	0.00831658	0.00601875	0.00647144	0.00592679	0.00492339
100.021	6.89583	0.0330299	0.0199363	0.0197245	0.0197786	0.00815731	0.00572088	0.00745206	0.00616118	0.00466058
100.021	6.9375	0.0278519	0.0183657	0.017604	0.0187608	0.00687777	0.00485058	0.00694244	0.0054545	0.0037989
100.021	6.97917	0.0281362	0.01925	0.0167691	0.0178544	0.00685707	0.00555382	0.00836742	0.006029	0.00392405
100.021	7.02083	0.021877	0.0149581	0.015487	0.0144193	0.00533791	0.00444024	0.00730216	0.00535556	0.00335845
100.021	7.0625	0.0194741	0.0139939	0.0131737	0.013394	0.00482864	0.00396388	0.00585898	0.00462353	0.00296272
100.021	7.10417	0.016186	0.0109862	0.00989139	0.0111418	0.00364585	0.00291314	0.00448327	0.00332947	0.00226204
100.021	7.14583	0.0159238	0.0108585	0.0103871	0.0125399	0.00415435	0.00281971	0.00407976	0.00309742	0.00211982
100.021	7.1875	0.0162322	0.0118306	0.0114558	0.0120289	0.00434672	0.00277121	0.00398236	0.00300735	0.00228588
100.021	7.22917	0.0180442	0.010522	0.0111249	0.0112225	0.00390575	0.00276656	0.00357722	0.0027982	0.00224716
100.021	7.27083	0.0281645	0.0163963	0.0160673	0.015907	0.00563882	0.00424419	0.00479136	0.00460892	0.00343044
100.021	7.3125	0.0283447	0.0183345	0.0178153	0.0168178	0.0056199	0.00418891	0.00563075	0.00491063	0.00371774
100.021	7.35417	0.0302359	0.018756	0.0190685	0.0168641	0.00576229	0.00381665	0.00590899	0.00500264	0.00391815
100.021	7.39583	0.0332205	0.0219082	0.0221309	0.0190656	0.0067456	0.00430708	0.00611295	0.00538779	0.00411834
100.021	7.4375	0.0357727	0.0258021	0.0255009	0.0216457	0.00758142	0.0052419	0.00670652	0.00610501	0.00470571
100.021	7.47917	0.0350159	0.0271083	0.0274775	0.0216808	0.00781977	0.00537338	0.00663265	0.00563962	0.00477347
100.021	7.52083	0.0433591	0.0364973	0.0381412	0.0310445	0.0112343	0.00674761	0.00857491	0.00770726	0.00618315
100.021	7.5625	0.047831	0.0342525	0.0386411	0.0329675	0.0114645	0.00653606	0.00853183	0.00750277	0.0062441
100.021	7.60417	0.0512299	0.0347043	0.0365098	0.0357687	0.0118327	0.00653589	0.0086818	0.00734315	0.00620978
100.021	7.64583	0.0478972	0.0367408	0.0348297	0.0357926	0.0116507	0.00663641	0.00912264	0.00813804	0.00694388
100.021	7.6875	0.0461568	0.0383952	0.0368411	0.0361423	0.0120111	0.00730292	0.00921705	0.00813122	0.00692401
100.021	7.72917	0.0498051	0.0428627	0.0430857	0.0401298	0.0136258	0.00810931	0.0108055	0.00861779	0.00633795
100.021	7.77083	0.0480764	0.0443269	0.0439062	0.0349049	0.0125075	0.00766208	0.0103549	0.00765003	0.00654889
100.021	7.8125	0.0564642	0.0466262	0.0448682	0.0310071	0.0115377	0.00768169	0.00896376	0.00749444	0.00663821
100.021	7.85417	0.0499652	0.0388651	0.0380255	0.0297471	0.0108642	0.00707385	0.00838172	0.00672637	0.00558714
100.021	7.89583	0.0464345	0.0349223	0.0327965	0.0269359	0.0101517	0.00668162	0.00753711	0.00638722	0.00548474
100.021	7.9375	0.0337858	0.0277462	0.0234422	0.0220223	0.0079405	0.00562614	0.00560149	0.00501229	0.00436397
100.021	7.97917	0.0358026	0.0276716	0.0229935	0.0214569	0.0080781	0.0059965	0.00578276	0.00496329	0.00438741
100.021	8.02083	0.0354407	0.0275029	0.0253223	0.0227573	0.00879574	0.00631654	0.00614619	0.00506445	0.00468293
100.021	8.0625	0.0321202	0.0261021	0.0271297	0.0238133	0.00941026	0.00667889	0.00596861	0.00587349	0.00557846
100.021	8.10417	0.0248843	0.0228806	0.0255947	0.0218773	0.00908914	0.0064415	0.00583967	0.00605657	0.00566729
100.021	8.14583	0.025233	0.0234269	0.0268884	0.0234367	0.00884235	0.00670304	0.00605473	0.00579728	0.00499313
100.021	8.1875	0.033662	0.0316138	0.0369147	0.0313702	0.0117655	0.00810647	0.0077742	0.00742927	0.00652577
100.021	8.22917	0.0313592	0.0321585	0.0360307	0.028827	0.0122216	0.00759993	0.00780148	0.00677573	0.00568533
100.021	8.27083	0.0350942	0.0334241	0.0372406	0.0289905	0.0138105	0.00727826	0.00842909	0.00557762	0.00626762
100.021	8.3125	0.0345972	0.0343254	0.0340335	0.0250598	0.0138683	0.0071707	0.00763825	0.00531034	0.00608783
100.021	8.35417	0.0331837	0.0387869	0.0343321	0.0270422	0.0143197	0.00694749	0.00848524	0.00551024	0.00665974
100.021	8.39583	0.0291072	0.0343627	0.0329003	0.0283167	0.012919	0.00766419	0.00776628	0.00571211	0.00628844
100.021	8.4375	0.0225159	0.0257679	0.0268132	0.0217232	0.00993654	0.00632831	0.00543629	0.00491883	0.00551788
100.021	8.47917	0.0249565	0.028495	0.0289441	0.0262624	0.0112263	0.00688186	0.00549092	0.00569598	0.00632438
100.021	8.52083	0.0285102	0.0328129	0.0399009	0.0323865	0.0136636	0.007948	0.00703711	0.00651105	0.0075892
100.021	9.4375	0.0427496	0.0430905	0.0374728	0.0394385	0.030763	0.0246084	0.0250843	0.0217633	0.0211427
100.021	9.47917	0.0190133	0.0191935	0.017403	0.0173167	0.0140868	0.014087	0.0124092	0.00999452	0.0103515
100.021	9.52083	0.0215992	0.0182517	0.0192672	0.0190796	0.017127	0.0165919	0.0133147	0.0115073	0.0124067
100.021	9.5625	0.0383104	0.033657	0.0397453	0.0385075	0.0332095	0.0302756	0.0258129	0.0248413	0.0220134
100.021	9.72917	0.0170046	0.0184537	0.018377	0.0174447	0.0156122	0.0126996	0.0150034	0.013218	0.0140283
100.021	9.77083	0.0170343	0.0172852	0.0183979	0.0174019	0.017212	0.0140134	0.0138157	0.0137896	0.0142142
100.062	13.0208	0.112267	0.0995583	0.11157	0.131291	0.113609	0.0424989	0.0106468	0.00777041	0.00940792
100.062	13.0625	0.1114	0.0939706	0.105171	0.13397	0.127755	0.042661	0.0103366	0.00771039	0.00935634
100.062	13.1042	0.110842	0.0836964	0.0952445	0.131418	0.132058	0.0440473	0.00953791	0.00762976	0.00928639
100.062	13.1458	0.114968	0.0791866	0.0825458	0.1339	0.143181	0.0413882	0.0088489	0.00747718	0.00876877
100.062	13.4375	0.121783	0.0824601	0.0729207	0.131257	0.129528	0.0268546	0.00532049	0.00603077	0.00738546
100.062	13.4792	0.145844	0.0865706	0.0757439	0.135432	0.132438	0.0258695	0.00621559	0.00683107	0.00841704
100.062	13.5208	0.117509	0.0677954	0.0594393	0.107105	0.0997346	0.0190125	0.00491989	0.0057888	0.00699435
100.062	13.5625	0.124233	0.072443	0.0633914	0.115015	0.0964886	0.0181068	0.00511499	0.00652679	0.00809499
100.062	13.6042	0.128463	0.0729015	0.0644554	0.126989	0.0959707	0.0191167	0.00509494	0.00766216	0.00912849
100.062	13.6458	0.127723	0.0692499	0.065997	0.117337	0.0962159	0.0177022	0.00502155	0.00762395	0.00882299
100.062	13.6875	0.149946	0.0833703	0.0843403	0.152632	0.116026	0.0230417	0.00602349	0.00896344	0.0103976
100.062	13.7292	0.152738	0.0811559	0.0894515	0.152693	0.124125	0.0225115	0.00642247	0.00978236	0.00980772
100.062	13.7708	0.140481	0.078653	0.0821322	0.144472	0.114375	0.0203221	0.00660648	0.00827478	0.00819001
100.062	13.8125	0.106998	0.0556552	0.0569287	0.104366	0.0855274	0.0148183	0.00485258	0.00600825	0.00522466
100.062	13.8542	0.106712	0.0556086	0.0585955	0.11361	0.100713	0.0169774	0.00542597	0.0066315	0.00584176
100.062	13.8958	0.116355	0.0646488	0.0642883	0.135036	0.124005	0.0217752	0.00738706	0.00853503	0.00615784
100.062	13.9375	0.138044	0.079668	0.0855524	0.169057	0.156887	0.0258329	0.00993283	0.00995929	0.00626362
100.062	13.9792	0.13506	0.081266	0.0863324	0.174571	0.145723	0.029861	0.0115017	0.0105612	0.00596243
100.062	14.0208	0.132992	0.0742053	0.0781069	0.153303	0.122896	0.0345385	0.0135098	0.00925227	0.00530347
100.062	14.0625	0.0976949	0.0583165	0.0637415	0.123309	0.0968763	0.0303955	0.0115199	0.00775786	0.0037759
100.062	14.1042	0.0888441	0.0544544	0.0654786	0.116362	0.0982942	0.0335922	0.0129379	0.00712649	0.00350375
100.062	14.1458	0.0829719	0.0580327	0.0630403	0.109905	0.0902753	0.0350447	0.0140185	0.00687487	0.00299182
100.062	14.1875	0.0882639	0.0632569	0.0717203	0.108794	0.08966	0.0377789	0.0162578	0.00692571	0.00306742
100.062	14.2292	0.0814073	0.0545401	0.0630635	0.0899611	0.0828689	0.0394775	0.018127	0.00685273	0.00267764
100.062	14.2708	0.0889819	0.0590397	0.0700419	0.0915797	0.0868706	0.0478146	0.0247672	0.00760582	0.00296849
100.062	14.3125	0.0908967	0.0593751	0.0654318	0.0907361	0.0866005	0.0501698	0.0285128	0.00759983	0.00296667
100.062	14.3542	0.0885173	0.0590502	0.0600534	0.0848177	0.0852046	0.0486521	0.0325709	0.00858286	0.00296778
100.062	14.3958	0.0860092	0.0603163	0.0631458	0.0839459	0.0787999	0.0542418	0.0393206	0.00875058	0.00318981
100.062	14.4375	0.0850135	0.0646683	0.0631539	0.0903247	0.0763388	0.0575559	0.0432133	0.0100096	0.00313589
100.062	14.4792	0.0871197	0.0706788	0.0720401	0.0999926	0.0876971	0.0652781	0.0484899	0.0110798	0.00311123
100.062	14.5208	0.0925696	0.0730659	0.0763545	0.103229	0.0921954	0.0734013	0.0507125	0.0113087	0.00356511
100.062	14.5625	0.110857	0.0905156	0.0862073	0.118293	0.111272	0.0885564	0.0632707	0.0133246	0.00367127
100.062	14.6042	0.106995	0.0899757	0.0803214	0.112069	0.111164	0.0912315	0.0642911	0.0127245	0.00339233
100.062	14.6458	0.103859	0.0895287	0.083605	0.122027	0.111013	0.0868847	0.0571521	0.0108424	0.00278996
100.062	14.6875	0.108121	0.0944428	0.0830481	0.124689	0.113401	0.0835778	0.0531049	0.00961296	0.00277325
100.062	14.7292	0.105361	0.0804366	0.0750516	0.112698	0.103233	0.0704454	0.0414857	0.00712905	0.00232941
100.062	14.7708	0.100111	0.0811627	0.0676492	0.101054	0.101562	0.0627006	0.0347933	0.00643078	0.00207834
100.062	14.8125	0.107619	0.0759158	0.0650688	0.0981855	0.101658	0.056866	0.0318143	0.00602604	0.00194718
100.062	14.8542	0.0940327	0.0731268	0.0605007	0.0908626	0.0967291	0.0528917	0.0284653	0.00530517	0.00176931
100.062	14.8958	0.0970957	0.0767835	0.0637923	0.108238	0.095432	0.0504148	0.0267502	0.00557189	0.00185793
100.062	14.9375	0.0920636	0.0776807	0.0726423	0.110294	0.0965609	0.0499614	0.0233135	0.00527168	0.00195281
100.062	14.9792	0.0885434	0.0765254	0.0699689	0.109748	0.0974544	0.0490816	0.0224942	0.00506237	0.00203833
100.062	15.0208	0.0724102	0.0674007	0.050805	0.0970147	0.0928449	0.0386777	0.0171057	0.00409778	0.00176728
100.062	15.0625	0.0786101	0.067847	0.0605989	0.11726	0.103548	0.0397262	0.0208308	0.00532449	0.00240966
100.062	15.1042	0.0903458	0.0742285	0.0640164	0.151226	0.116762	0.0425581	0.0252927	0.00654878	0.00305053
100.062	15.1458	0.0917322	0.0799166	0.0685025	0.164201	0.12441	0.0516296	0.0322552	0.0104255	0.00478895
100.062	15.1875	0.0899329	0.0768462	0.0756485	0.192155	0.159439	0.0644794	0.0441475	0.0177696	0.00862974
100.062	15.2292	0.0992866	0.081839	0.0800594	0.204978	0.177021	0.073772	0.0632108	0.0308437	0.0178394
100.062	15.2708	0.102215	0.0842097	0.0956704	0.219694	0.207647	0.0912045	0.100112	0.0626387	0.0436378
100.062	15.3125	0.11431	0.0889171	0.100134	0.268409	0.235475	0.131579	0.167028	0.129161	0.0966554
100.062	15.3542	0.111216	0.0855593	0.0996278	0.280452	0.258919	0.155052	0.20354	0.192098	0.163335
100.062	15.3958	0.104913	0.0841159	0.0998514	0.287385	0.283044	0.1658	0.237806	0.248543	0.229241
100.062	15.4375	0.127309	0.104643	0.125795	0.346909	0.344949	0.228974	0.349091	0.351752	0.348569
100.062	15.4792	0.137231	0.0999431	0.132675	0.364903	0.365703	0.240887	0.349202	0.39302	0.391768
100.062	15.5208	0.141563	0.110632	0.119631	0.385946	0.373913	0.266109	0.352379	0.392599	0.379698
100.062	15.5625	0.14754	0.114265	0.117516	0.374667	0.39401	0.27383	0.345586	0.391777	0.368961
100.062	15.6042	0.178443	0.123884	0.129288	0.386423	0.405444	0.266853	0.366236	0.360755	0.345552
100.062	15.6458	0.268957	0.184656	0.164808	0.45361	0.442429	0.316333	0.461348	0.421027	0.389346
100.062	15.6875	0.249575	0.160775	0.146058	0.380749	0.343207	0.259921	0.348982	0.349959	0.301101
100.062	15.7292	0.335213	0.200382	0.166701	0.367685	0.375344	0.254033	0.331815	0.320052	0.273943
100.062	15.7708	0.416919	0.257095	0.200332	0.345724	0.355129	0.266873	0.3095	0.270709	0.226466
100.062	15.8125	0.46446	0.300227	0.219651	0.357121	0.344687	0.256697	0.262999	0.211513	0.178944
100.062	15.8542	0.518013	0.341185	0.259454	0.355358	0.324429	0.25523	0.235802	0.174852	0.136606
100.062	15.8958	0.508349	0.337404	0.248612	0.325658	0.323436	0.290383	0.2379	0.180554	0.128907
100.062	15.9375	0.495019	0.324189	0.24619	0.301017	0.271046	0.3155	0.256388	0.181319	0.142717
100.062	15.9792	0.526239	0.347547	0.24103	0.257508	0.248266	0.297393	0.217634	0.150398	0.119941
100.062	16.0208	0.48345	0.304271	0.209078	0.18241	0.204001	0.254106	0.176029	0.12121	0.0912282
100.062	16.0625	0.496317	0.303068	0.231408	0.181073	0.195099	0.324157	0.212488	0.13114	0.103945
100.062	16.1042	0.46959	0.273841	0.211893	0.163757	0.1776	0.330135	0.212146	0.128234	0.102564
100.062	16.1458	0.302952	0.181043	0.150167	0.131448	0.146163	0.30692	0.206821	0.119652	0.0958519
100.062	16.1875	0.102122	0.065153	0.0723273	0.0676374	0.0913001	0.21742	0.147467	0.0936836	0.0745104
100.062	16.2292	0.0324214	0.0242408	0.0365821	0.0417278	0.0650727	0.191926	0.119075	0.0692434	0.0690309
100.062	16.2708	0.0119575	0.0101098	0.0201484	0.0262358	0.0499872	0.168745	0.0988817	0.0648861	0.0630467
100.062	16.3125	0.010453	0.00891368	0.0179441	0.0229286	0.0459159	0.166029	0.0950333	0.060312	0.0554194
100.062	16.3542	0.0214356	0.0154224	0.0295656	0.0262671	0.0526954	0.185633	0.0895962	0.0659289	0.0648034
100.062	16.3958	0.052083	0.0333491	0.0515691	0.0368234	0.0671794	0.196781	0.0974328	0.0745513	0.0653855
100.062	16.4375	0.12106	0.0687812	0.0876455	0.0505343	0.0781002	0.229607	0.105938	0.0769668	0.0733381
100.062	16.4792	0.188076	0.109325	0.119291	0.0620047	0.0796671	0.230541	0.107892	0.0678956	0.0635802
100.062	16.5208	0.238945	0.146141	0.15107	0.072657	0.0816474	0.245806	0.108461	0.0598046	0.0556314
100.062	16.5625	0.282121	0.190491	0.180845	0.0824749	0.100861	0.243038	0.103312	0.0510255	0.0434885
100.062	16.6042	0.303259	0.207313	0.206279	0.086062	0.102185	0.241269	0.101038	0.0443256	0.0321899
100.062	16.6458	0.376355	0.264383	0.255393	0.122957	0.132968	0.279306	0.107277	0.0412367	0.0334226
100.062	16.6875	0.298021	0.233478	0.216896	0.126125	0.132032	0.26831	0.0940999	0.0372951	0.0276463
100.062	16.7292	0.212754	0.188982	0.210496	0.124797	0.14113	0.250868	0.103049	0.0359147	0.0242612
100.062	16.7708	0.213874	0.190885	0.222005	0.132417	0.15333	0.268121	0.100953	0.03167	0.022084
100.062	16.8125	0.278186	0.255101	0.282753	0.165112	0.179566	0.282166	0.086754	0.0278776	0.0186056
100.062	16.8542	0.290615	0.269034	0.287908	0.159665	0.15603	0.226341	0.0663104	0.0188954	0.0117282
100.062	16.8958	0.368713	0.321084	0.337024	0.18658	0.188705	0.237009	0.0675609	0.0172241	0.00916727
100.062	16.9375	0.446454	0.39533	0.40443	0.230204	0.196412	0.261704	0.0642596	0.015372	0.00742911
100.062	16.9792	0.491026	0.440618	0.440836	0.247316	0.220451	0.257488	0.0633585	0.0132123	0.00594478
100.062	17.0208	0.47489	0.458611	0.517233	0.302255	0.281413	0.300067	0.0850263	0.0142366	0.00609125
100.062	17.0625	0.397515	0.392563	0.482974	0.311406	0.286118	0.294282	0.0752807	0.0125416	0.00520089
100.062	17.1042	0.331021	0.35696	0.468956	0.300641	0.261266	0.282272	0.0660639	0.0108343	0.00499554
100.062	17.1458	0.266531	0.326499	0.466413	0.313768	0.250209	0.278848	0.0628942	0.0106096	0.00496047
100.062	17.1875	0.207353	0.267666	0.425806	0.272355	0.243457	0.26641	0.0603327	0.00945525	0.00396893
100.062	17.2292	0.153505	0.223516	0.404862	0.25964	0.225385	0.256597	0.0558873	0.00757264	0.00353995
100.062	17.2708	0.10599	0.164343	0.349624	0.23872	0.227144	0.233553	0.0537797	0.00724647	0.00302217
100.062	17.3125	0.0723435	0.126669	0.300367	0.206123	0.212263	0.230636	0.046335	0.00610748	0.00282177
100.062	17.3542	0.0529987	0.101003	0.229926	0.194201	0.195085	0.219574	0.0469243	0.00555762	0.00244388
100.062	17.3958	0.0416929	0.0850138	0.21444	0.181662	0.174873	0.208311	0.040709	0.00523314	0.0023304
100.062	17.4375	0.0407557	0.0770103	0.20285	0.178057	0.172603	0.20823	0.0415802	0.00550534	0.00213064
100.062	17.4792	0.0428071	0.0732381	0.194818	0.17085	0.175791	0.202833	0.0469268	0.00612532	0.00227717
100.062	17.5208	0.0435029	0.0790329	0.202245	0.167742	0.184506	0.201514	0.0495188	0.00681689	0.00325579
100.062	17.5625	0.0435807	0.0839998	0.199955	0.173146	0.197327	0.213125	0.0568982	0.00898381	0.00426391
100.062	17.6042	0.0322765	0.0659888	0.166674	0.126711	0.152337	0.163141	0.0481306	0.00781885	0.00360537
100.062	17.6458	0.0311464	0.0685234	0.173382	0.142803	0.155956	0.187556	0.0544687	0.00974635	0.004298
100.062	17.6875	0.0311166	0.0658566	0.161495	0.145019	0.149917	0.183238	0.0519372	0.0106464	0.00513775
100.062	17.7292	0.0290593	0.0648874	0.160433	0.145494	0.148681	0.19621	0.053024	0.0112902	0.00605316
100.062	17.7708	0.032877	0.0668399	0.157435	0.1369	0.131005	0.184786	0.0578186	0.0147848	0.00731142
100.062	17.8125	0.0402096	0.0749863	0.17493	0.138367	0.130772	0.184753	0.0665735	0.0206564	0.0112526
100.062	17.8542	0.0356165	0.0584944	0.136978	0.111704	0.107835	0.165776	0.0596333	0.0202436	0.0111382
100.062	17.8958	0.0372332	0.0628214	0.136721	0.104995	0.112704	0.162719	0.0682732	0.0241279	0.0150795
100.062	17.9375	0.0512867	0.0727967	0.160879	0.112241	0.126055	0.202634	0.0988979	0.0307587	0.0218488
100.062	17.9792	0.0604517	0.0917864	0.207275	0.151343	0.157074	0.24973	0.129195	0.0532463	0.0379245
100.062	18.0208	0.0866456	0.114357	0.240883	0.182199	0.203802	0.278475	0.159579	0.0759177	0.0581939
100.062	18.0625	0.0835379	0.132638	0.2664	0.205157	0.197032	0.302968	0.177144	0.0915783	0.0692882
100.062	18.1042	0.0824592	0.133431	0.281323	0.210489	0.192673	0.310555	0.192971	0.101526	0.0813171
100.062	18.1458	0.0617064	0.10056	0.213514	0.148404	0.144349	0.238109	0.136318	0.0746998	0.0646089
100.062	18.1875	0.0766096	0.122106	0.224492	0.146675	0.147275	0.248335	0.148193	0.0839055	0.0907007
100.062	18.2292	0.076759	0.121199	0.230569	0.143165	0.15365	0.252891	0.150881	0.0931683	0.095788
100.062	18.2708	0.0738201	0.112194	0.217412	0.141916	0.146728	0.235525	0.139883	0.0933083	0.101703
100.062	18.3125	0.0733899	0.102087	0.198778	0.124146	0.135289	0.233314	0.132433	0.109348	0.115695
100.062	18.3542	0.0738583	0.0939848	0.183143	0.121141	0.130683	0.215183	0.129158	0.110975	0.120325
100.062	18.3958	0.0751978	0.0941599	0.178335	0.112534	0.11611	0.215557	0.126483	0.110024	0.13601
100.062	18.4375	0.0626919	0.0917442	0.181007	0.110867	0.114838	0.21278	0.117007	0.105517	0.148011
100.062	18.4792	0.0619761	0.0863816	0.162871	0.107386	0.107875	0.220052	0.103376	0.103172	0.147707
100.062	18.5208	0.0608066	0.0858421	0.159558	0.0992899	0.106739	0.205557	0.101041	0.103106	0.141998
100.062	18.5625	0.0657487	0.0852473	0.152006	0.0917712	0.102041	0.198502	0.0903128	0.106012	0.140535
100.062	18.6042	0.0597443	0.0812259	0.145934	0.0861755	0.0978497	0.178503	0.0842479	0.099999	0.131724
100.062	18.6458	0.0584315	0.0809489	0.139914	0.0663844	0.0883166	0.181455	0.0772061	0.083163	0.12652
100.062	18.6875	0.0628782	0.0841789	0.136024	0.064881	0.0931548	0.164999	0.0734545	0.0762749	0.118078
100.062	18.7292	0.0561973	0.085098	0.141891	0.0632249	0.0887075	0.158751	0.0673082	0.069974	0.0930158
100.062	18.7708	0.0552223	0.0771937	0.135784	0.0659342	0.0817311	0.160177	0.0604903	0.0566387	0.088785
100.062	18.8125	0.0627549	0.0865947	0.148655	0.0655268	0.0811671	0.155634	0.0606643	0.0560779	0.0974327
100.062	18.8542	0.0658676	0.0835374	0.148659	0.0628348	0.0713302	0.151935	0.0561362	0.0561724	0.0834045
100.062	18.8958	0.068074	0.0975732	0.14331	0.0604665	0.0733929	0.158043	0.0565859	0.0512645	0.082186
100.062	18.9375	0.0726657	0.0923238	0.141947	0.0564839	0.0805655	0.165175	0.0619279	0.0575317	0.0832419
100.062	18.9792	0.0702806	0.0971353	0.154555	0.0606431	0.078906	0.174585	0.0656736	0.0594737	0.0749235
100.062	19.0208	0.0672225	0.0976125	0.150955	0.057302	0.0764013	0.178691	0.067237	0.0575515	0.071683
100.062	19.0625	0.0671645	0.100417	0.147511	0.0560706	0.0760061	0.186935	0.0793283	0.059713	0.0730112
100.062	19.1042	0.074684	0.105633	0.144824	0.0571236	0.0767872	0.2005	0.0858758	0.0613183	0.0778427
100.062	19.1458	0.0783165	0.103234	0.141359	0.0568904	0.0795185	0.201041	0.0914295	0.0686023	0.0796973
100.062	19.1875	0.0993538	0.128193	0.198852	0.0776528	0.0993451	0.267587	0.140593	0.0986383	0.10461
100.062	19.2292	0.0732575	0.106295	0.178814	0.0647301	0.0827173	0.227876	0.123709	0.0915651	0.0913879
100.062	19.2708	0.0684698	0.113246	0.196247	0.0734989	0.0900381	0.248683	0.146643	0.109863	0.105794
100.062	19.3125	0.0756683	0.114077	0.197564	0.0846117	0.101969	0.285075	0.180059	0.117762	0.109618
100.062	19.3542	0.0719089	0.115835	0.194418	0.0834643	0.103574	0.28909	0.201432	0.129992	0.11071
100.062	19.3958	0.0707325	0.119283	0.1891	0.0923977	0.108961	0.312186	0.215252	0.140935	0.116472
100.062	19.4375	0.070444	0.117494	0.19175	0.100568	0.119482	0.330863	0.215329	0.149872	0.125361
100.062	19.4792	0.0803996	0.125613	0.205532	0.112011	0.132126	0.346775	0.228381	0.16408	0.146054
100.062	19.5208	0.0843345	0.119514	0.194614	0.104558	0.130899	0.356254	0.23827	0.176789	0.151417
100.062	19.5625	0.0900686	0.126205	0.210015	0.100588	0.141315	0.358183	0.244947	0.17491	0.152095
100.062	19.6042	0.0922991	0.117022	0.199046	0.107423	0.149275	0.376836	0.22854	0.180642	0.15549
100.062	19.6458	0.0940528	0.127612	0.191817	0.119267	0.154761	0.393241	0.251206	0.190367	0.146849
100.062	19.6875	0.0949524	0.133113	0.207474	0.115759	0.164555	0.396622	0.27045	0.17631	0.133792
100.062	19.7292	0.0949317	0.130455	0.202604	0.122425	0.158853	0.380162	0.269192	0.162361	0.118062
100.062	19.7708	0.0939929	0.120784	0.211229	0.126894	0.173294	0.415054	0.270422	0.155907	0.112318
100.062	19.8125	0.0917835	0.114781	0.199012	0.133412	0.180537	0.399902	0.277669	0.137271	0.100075
100.062	19.8542	0.0925207	0.126268	0.20572	0.117335	0.194708	0.389598	0.281613	0.134184	0.0979858
100.062	19.8958	0.0934406	0.119786	0.207166	0.132764	0.203662	0.445006	0.280594	0.129466	0.107467
100.062	19.9375	0.0939957	0.119285	0.206183	0.14588	0.20667	0.447202	0.279911	0.13588	0.114078
100.062	19.9792	0.0840275	0.122719	0.212613	0.148584	0.209595	0.461995	0.288595	0.161172	0.116912
100.062	20.0208	0.0801918	0.10914	0.183878	0.141811	0.196088	0.430685	0.290588	0.148153	0.112456
100.062	20.0625	0.0779176	0.11299	0.182098	0.132464	0.191626	0.41536	0.262846	0.143482	0.110802
100.062	20.1042	0.0756558	0.114171	0.181249	0.119772	0.177611	0.344903	0.219074	0.115437	0.0891016
100.062	20.1458	0.0662849	0.0999981	0.166914	0.108717	0.145053	0.295913	0.169253	0.0913724	0.0740575
100.062	20.1875	0.0604398	0.0889277	0.144164	0.098007	0.118023	0.224681	0.134675	0.0704243	0.0587478
100.062	20.2292	0.0557067	0.0802695	0.123001	0.0826104	0.0997002	0.172127	0.0984332	0.0578482	0.0471433
100.062	20.2708	0.0500048	0.0676856	0.111412	0.0710454	0.0868772	0.132425	0.071773	0.0370541	0.0349499
100.062	20.3125	0.051817	0.0653847	0.118669	0.0696847	0.0838876	0.120408	0.0686974	0.0381913	0.0291509
100.062	20.3542	0.0499907	0.0635439	0.0890736	0.0656261	0.0797781	0.118367	0.0584175	0.0314602	0.0245616
100.062	6.52083	0.0327394	0.020888	0.0202782	0.0218047	0.0128923	0.0124272	0.0132434	0.011157	0.00888326
100.062	6.5625	0.0310165	0.0217964	0.0218896	0.021709	0.0122581	0.0113297	0.0114437	0.00971184	0.00767198
100.062	6.60417	0.0273106	0.0189025	0.0168198	0.0183317	0.0104403	0.00888665	0.00933835	0.00799463	0.00622941
100.062	6.64583	0.0317912	0.0220605	0.0209073	0.0235479	0.0130919	0.00979032	0.00934282	0.00865818	0.00685638
100.062	6.6875	0.037906	0.023001	0.0238242	0.0246124	0.0135163	0.00921585	0.00923805	0.00852954	0.00694695
100.062	6.72917	0.0289398	0.0186604	0.017642	0.0188061	0.00896766	0.00678618	0.00680653	0.00610295	0.00527193
100.062	6.77083	0.0256625	0.0163238	0.0149265	0.0176308	0.0084127	0.00570533	0.00631059	0.005676	0.00477086
100.062	6.8125	0.0292533	0.0191492	0.0163962	0.021009	0.00901087	0.00633022	0.00736725	0.00632791	0.00491204
100.062	6.85417	0.0295599	0.0187578	0.01637	0.0187163	0.00810457	0.00573258	0.00754971	0.00641881	0.00492926
100.062	6.89583	0.0153291	0.0094747	0.00816712	0.0093225	0.0041081	0.00278791	0.00389638	0.00320665	0.00241859
100.062	6.9375	0.0160277	0.00984681	0.00963334	0.00976348	0.00366402	0.00301261	0.00415866	0.00352717	0.00258203
100.062	6.97917	0.0152292	0.00947022	0.00934237	0.00915556	0.00382807	0.00316211	0.00470545	0.00356411	0.00250653
100.062	7.02083	0.015613	0.00914582	0.00944909	0.009218	0.00343579	0.00287202	0.00467223	0.00340981	0.00235539
100.062	7.0625	0.0151212	0.010176	0.00929172	0.00985662	0.00356145	0.00300068	0.00457024	0.00365047	0.00236392
100.062	7.10417	0.0156527	0.0109453	0.00928942	0.0110526	0.004006	0.00303118	0.00443251	0.00318023	0.00211741
100.062	7.14583	0.0150748	0.0107411	0.00936868	0.0109461	0.00401683	0.00292681	0.00431479	0.00329275	0.00223301
100.062	7.1875	0.0149628	0.0102303	0.00941119	0.0114789	0.00432363	0.00263541	0.00382245	0.00278922	0.00212009
100.062	7.22917	0.0243733	0.0185802	0.0163099	0.018859	0.00703436	0.00427581	0.0060639	0.00457897	0.00330076
100.062	7.27083	0.029958	0.0202189	0.0172943	0.0202633	0.00699607	0.0046811	0.00657101	0.00520674	0.00401563
100.062	7.3125	0.0324212	0.0209771	0.0183431	0.0207107	0.00654203	0.00470624	0.00620586	0.00538677	0.00418478
100.062	7.35417	0.0279413	0.0195817	0.0202968	0.017747	0.00625284	0.00373338	0.00605149	0.00475598	0.00416053
100.062	7.39583	0.0445288	0.0311829	0.0313932	0.0296851	0.0101178	0.00613986	0.00896042	0.00826693	0.00681641
100.062	7.4375	0.0459089	0.0323981	0.0319411	0.0294247	0.00995004	0.00648324	0.0080646	0.00774018	0.00653306
100.062	7.47917	0.0476219	0.0360367	0.0361011	0.0294893	0.0104132	0.00636145	0.00830182	0.00716834	0.00623723
100.062	7.52083	0.0436804	0.0376378	0.0360946	0.0281833	0.0108655	0.00595561	0.00802279	0.00686035	0.00690336
100.062	7.5625	0.0437736	0.0348724	0.0359878	0.0311396	0.0106042	0.00626836	0.00835416	0.00756496	0.00664497
100.062	7.60417	0.0383647	0.0266106	0.0257696	0.0255324	0.00858089	0.00514485	0.00632173	0.00559596	0.00502392
100.062	7.64583	0.0434708	0.03597	0.0325837	0.0300466	0.0104719	0.0064691	0.00804459	0.0073834	0.00601351
100.062	7.6875	0.0465826	0.0387056	0.0356678	0.0346008	0.012976	0.00766035	0.00877341	0.00824303	0.00749292
100.062	7.72917	0.0471449	0.0422413	0.0381421	0.0347758	0.0132653	0.00780241	0.0100126	0.00841169	0.0066524
100.062	7.77083	0.0384032	0.031006	0.0313666	0.0255912	0.00991007	0.00571597	0.00765533	0.00645995	0.00529663
100.062	7.8125	0.0411037	0.0312154	0.0309737	0.0251594	0.00885385	0.00584736	0.00684172	0.00618753	0.00517368
100.062	7.85417	0.047827	0.0404499	0.038314	0.0315426	0.011617	0.00851298	0.00929946	0.00807036	0.00633341
100.062	7.89583	0.0357392	0.0288613	0.0291754	0.0209651	0.00877038	0.00644456	0.00647976	0.00563325	0.00496264
100.062	7.9375	0.0374715	0.029993	0.0277758	0.022256	0.00929786	0.00656078	0.00646364	0.00619715	0.00586803
100.062	7.97917	0.0355205	0.0268452	0.0259682	0.0232106	0.0100125	0.00698482	0.00638077	0.00589226	0.0055946
100.062	8.02083	0.0305671	0.0242375	0.0261798	0.0224095	0.0098099	0.00686639	0.00614148	0.00579937	0.0056823
100.062	8.0625	0.0382433	0.0332808	0.0363479	0.0302162	0.0132204	0.00883905	0.00802309	0.00822139	0.00771607
100.062	8.10417	0.0320098	0.0306389	0.0350116	0.0307944	0.0128739	0.00897846	0.00774446	0.0080114	0.00766241
100.062	8.14583	0.0276153	0.0280995	0.0347219	0.0279081	0.0117184	0.00760935	0.00809607	0.00796883	0.00744909
100.062	8.1875	0.0285627	0.0308716	0.0377748	0.0279504	0.0111703	0.00803174	0.00754986	0.00664378	0.00723776
100.062	8.22917	0.0268564	0.0295145	0.0373351	0.0272098	0.0125484	0.00772003	0.00707175	0.00607535	0.00730326
100.062	8.27083	0.028031	0.0326201	0.0355405	0.0251658	0.013218	0.00761543	0.0077973	0.00610477	0.00636671
100.062	8.3125	0.0324082	0.0335245	0.0348784	0.0236305	0.0143111	0.00710684	0.00795138	0.00583687	0.0061939
100.062	8.35417	0.0315031	0.0341758	0.0343903	0.0272608	0.0143202	0.00702638	0.00782773	0.00574252	0.00646415
100.062	8.39583	0.022683	0.0267906	0.027195	0.0249238	0.0118808	0.00713735	0.00632343	0.00570245	0.00577466
100.062	8.4375	0.0249264	0.0282852	0.0299371	0.028262	0.0126959	0.00753867	0.00683081	0.00679485	0.00633729
100.062	9.47917	0.0369793	0.0374876	0.0362392	0.035106	0.0309141	0.0259259	0.0233176	0.0213968	0.0217729
100.062	9.5625	0.0387523	0.0334917	0.0372616	0.0323071	0.029675	0.0266924	0.0263405	0.0236252	0.0274831
100.062	9.6875	0.0195747	0.0189807	0.0204202	0.0175247	0.0151614	0.0138287	0.0146229	0.0148931	0.0152314
100.062	9.72917	0.0166983	0.0175642	0.019341	0.0173129	0.0154875	0.0129685	0.0163593	0.0146008	0.0137774
100.104	13.4375	0.133403	0.0897433	0.0752462	0.144863	0.142873	0.0280809	0.00615447	0.00654607	0.00797148
100.104	13.4792	0.126543	0.0806325	0.0683622	0.129915	0.123629	0.0228744	0.00484314	0.00580566	0.00649276
100.104	13.5208	0.123823	0.0700189	0.057926	0.113612	0.104924	0.0189579	0.00467525	0.00521328	0.00609187
100.104	13.5625	0.115025	0.0636212	0.0550817	0.102685	0.0985612	0.0168838	0.00436862	0.00598715	0.00659589
100.104	13.6042	0.120827	0.0621221	0.0527243	0.111078	0.0983138	0.0167071	0.00437275	0.00601926	0.00741627
100.104	13.6458	0.128081	0.0616706	0.0583097	0.11208	0.0876762	0.0143247	0.004175	0.00586648	0.0067146
100.104	13.6875	0.151789	0.073664	0.0748377	0.133778	0.108752	0.018555	0.0053	0.00779157	0.0085116
100.104	13.7292	0.147358	0.0757579	0.0758033	0.143285	0.114239	0.0191453	0.00557784	0.00811205	0.00781597
100.104	13.7708	0.133653	0.0676526	0.0690227	0.136191	0.11309	0.0162723	0.00544879	0.00706369	0.00658474
100.104	13.8125	0.0991989	0.0484575	0.0486218	0.102791	0.0833945	0.0117404	0.00369573	0.00480196	0.00458064
100.104	13.8542	0.102082	0.0498985	0.0497523	0.114943	0.10151	0.0138486	0.0044923	0.00563545	0.00457099
100.104	13.8958	0.122436	0.0640667	0.0640832	0.141013	0.12494	0.017197	0.00633858	0.00753207	0.00489219
100.104	13.9375	0.135943	0.0780799	0.0793702	0.163607	0.149099	0.0234345	0.00850266	0.0107334	0.00615465
100.104	13.9792	0.127846	0.0743208	0.0765126	0.162066	0.139116	0.026835	0.00982262	0.00980701	0.00538747
100.104	14.0208	0.119785	0.0751054	0.0761805	0.147237	0.130989	0.0298321	0.011492	0.00895762	0.0052279
100.104	14.0625	0.090906	0.0555816	0.0628661	0.109772	0.10002	0.0250207	0.00941825	0.00710028	0.0041271
100.104	14.1042	0.0888669	0.0554194	0.0624496	0.111861	0.0952386	0.0274822	0.0107413	0.00653372	0.00364529
100.104	14.1458	0.0864731	0.0594486	0.0598075	0.111404	0.0903669	0.0306326	0.0117002	0.00611377	0.00284558
100.104	14.1875	0.0820361	0.0603526	0.0627831	0.107765	0.0921176	0.0318352	0.0143685	0.0058608	0.00259822
100.104	14.2292	0.0838963	0.0589326	0.0627856	0.0960607	0.0903891	0.0372088	0.0168865	0.0061322	0.00278892
100.104	14.2708	0.0921874	0.0620653	0.0648229	0.101998	0.0911909	0.0435048	0.0221	0.00685155	0.00290656
100.104	14.3125	0.091345	0.0618877	0.0656952	0.0943967	0.0847083	0.0434742	0.0248553	0.00768376	0.0027876
100.104	14.3542	0.0951074	0.0657307	0.0632884	0.0874582	0.0845768	0.0451789	0.0287566	0.00762862	0.00286611
100.104	14.3958	0.0848291	0.0622379	0.0578559	0.0837076	0.0768222	0.0462533	0.032944	0.00805258	0.00270136
100.104	14.4375	0.0767409	0.0562878	0.0528317	0.0790219	0.0643112	0.0454388	0.0319817	0.00809063	0.00236142
100.104	14.4792	0.0842561	0.0636019	0.0639192	0.0957511	0.077511	0.0562399	0.0407005	0.00915122	0.00265579
100.104	14.5208	0.102075	0.0757969	0.0763424	0.109186	0.0938353	0.068121	0.0488004	0.0111065	0.00331235
100.104	14.5625	0.114216	0.0847641	0.0841801	0.123987	0.10443	0.0774732	0.0592871	0.0124018	0.0033057
100.104	14.6042	0.115364	0.0915521	0.0834725	0.123068	0.10494	0.0842789	0.0635628	0.0110442	0.00284319
100.104	14.6458	0.105121	0.088614	0.0786139	0.120994	0.105532	0.0810968	0.0589021	0.00994223	0.00247744
100.104	14.6875	0.097827	0.0842491	0.072695	0.11205	0.0973893	0.0695133	0.0470737	0.00852731	0.0022689
100.104	14.7292	0.0984559	0.0797498	0.0672748	0.10113	0.0951774	0.0646445	0.0392521	0.00661217	0.00218884
100.104	14.7708	0.0896701	0.0717275	0.0618552	0.0917268	0.0923004	0.0582555	0.029038	0.00535538	0.00183617
100.104	14.8125	0.0981536	0.0707874	0.0622624	0.0936155	0.0972126	0.0564092	0.0283388	0.00496983	0.00174166
100.104	14.8542	0.0974151	0.0716783	0.059328	0.0972648	0.103428	0.0512196	0.0266527	0.00463294	0.00166969
100.104	14.8958	0.0974447	0.0761163	0.0654	0.108118	0.107839	0.0497931	0.0247695	0.00462239	0.00171654
100.104	14.9375	0.09425	0.0809268	0.0651843	0.10839	0.103317	0.0508499	0.0221935	0.00465529	0.00182223
100.104	14.9792	0.0935917	0.0790895	0.0660009	0.119845	0.102003	0.0507423	0.0204291	0.00487026	0.00184078
100.104	15.0208	0.0739103	0.0616589	0.0496247	0.0917611	0.0850005	0.0356911	0.0140211	0.00349155	0.0015335
100.104	15.0625	0.0873133	0.066626	0.0573337	0.116615	0.10539	0.0402267	0.019069	0.00467416	0.00202156
100.104	15.1042	0.090554	0.0722372	0.0646257	0.14015	0.121612	0.0438085	0.0236347	0.00602209	0.0027842
100.104	15.1458	0.0879634	0.0760509	0.0690404	0.160967	0.13317	0.0483012	0.0289429	0.00831247	0.00406858
100.104	15.1875	0.0909341	0.0696682	0.0682051	0.172351	0.150089	0.0558857	0.0366073	0.014569	0.00759214
100.104	15.2292	0.0896659	0.076739	0.0745267	0.193744	0.174217	0.0678383	0.0535304	0.0242941	0.0139516
100.104	15.2708	0.106072	0.081071	0.0791763	0.222428	0.193216	0.088236	0.0791002	0.047153	0.0295324
100.104	15.3125	0.105411	0.0854784	0.0830934	0.255105	0.233423	0.127607	0.131656	0.0920114	0.0642188
100.104	15.3542	0.116389	0.0881099	0.102001	0.293274	0.292396	0.161059	0.19811	0.167292	0.135174
100.104	15.3958	0.116133	0.0967675	0.111795	0.338307	0.347407	0.194639	0.264987	0.270341	0.238894
100.104	15.4375	0.123699	0.0955101	0.112078	0.346125	0.351972	0.224763	0.310479	0.305518	0.271727
100.104	15.4792	0.138636	0.106971	0.124826	0.386902	0.397561	0.265762	0.355833	0.379274	0.334626
100.104	15.5208	0.165195	0.11785	0.133341	0.429305	0.432588	0.289019	0.401942	0.420837	0.390108
100.104	15.5625	0.184741	0.128162	0.122946	0.40086	0.393794	0.280603	0.368291	0.387844	0.353531
100.104	15.6042	0.204553	0.130325	0.137811	0.409078	0.396891	0.273149	0.366299	0.36103	0.31453
100.104	15.6458	0.297271	0.201293	0.173107	0.448487	0.452732	0.307285	0.414376	0.376023	0.353425
100.104	15.6875	0.281772	0.173592	0.137286	0.355203	0.354609	0.230369	0.310475	0.274988	0.252311
100.104	15.7292	0.382581	0.217591	0.180336	0.372974	0.365743	0.258521	0.303774	0.283718	0.256227
100.104	15.7708	0.466003	0.264096	0.190093	0.354517	0.349256	0.254312	0.268055	0.253922	0.218147
100.104	15.8125	0.531128	0.325005	0.224541	0.364286	0.357013	0.263166	0.255866	0.214404	0.179667
100.104	15.8542	0.610992	0.394393	0.267604	0.359627	0.360951	0.267482	0.235656	0.179318	0.155315
100.104	15.8958	0.587497	0.396815	0.278954	0.333442	0.34338	0.271005	0.237708	0.16987	0.142329
100.104	15.9375	0.611339	0.394733	0.268197	0.315473	0.301316	0.293327	0.239991	0.169672	0.127606
100.104	15.9792	0.645721	0.421177	0.272167	0.272975	0.274832	0.310112	0.229829	0.143692	0.107289
100.104	16.0208	0.626332	0.393333	0.256392	0.204288	0.211157	0.26979	0.175897	0.111897	0.0891946
100.104	16.0625	0.662387	0.426719	0.28187	0.220828	0.223562	0.332139	0.208381	0.12518	0.102929
100.104	16.1042	0.631895	0.379673	0.25569	0.188057	0.196991	0.321671	0.195191	0.115871	0.0923118
100.104	16.1458	0.401799	0.21907	0.172971	0.137622	0.155831	0.304537	0.185714	0.108837	0.0902129
100.104	16.1875	0.14622	0.0794689	0.0784747	0.0716689	0.0922531	0.229951	0.148382	0.0811466	0.071526
100.104	16.2292	0.0480505	0.0302409	0.0393069	0.0443017	0.065766	0.196231	0.110189	0.067861	0.0666249
100.104	16.2708	0.014401	0.0112452	0.0214953	0.0253758	0.049224	0.159873	0.0884692	0.0587582	0.0612728
100.104	16.3125	0.00856256	0.00712526	0.0151855	0.0177284	0.0387387	0.142705	0.0706382	0.0531834	0.0530907
100.104	16.3542	0.021216	0.0160824	0.0274114	0.0250623	0.0486282	0.170491	0.0798828	0.0562589	0.0556375
100.104	16.3958	0.0518284	0.0348865	0.0486093	0.0360717	0.0580271	0.1794	0.0796044	0.0623662	0.0580905
100.104	16.4375	0.117998	0.0718488	0.0831083	0.045861	0.0643986	0.195785	0.0896124	0.0637226	0.0620582
100.104	16.4792	0.236008	0.131411	0.130351	0.0580072	0.0778852	0.225801	0.0981744	0.064826	0.0662602
100.104	16.5208	0.296178	0.173781	0.156651	0.0710379	0.0774362	0.238028	0.10193	0.058204	0.0590975
100.104	16.5625	0.344452	0.213448	0.183615	0.0842682	0.0891541	0.226108	0.10038	0.0526272	0.0419082
100.104	16.6042	0.37287	0.241022	0.220743	0.0981617	0.107663	0.240369	0.0944464	0.0404683	0.0351961
100.104	16.6458	0.338583	0.245893	0.237792	0.11089	0.1331	0.26418	0.0985956	0.0435213	0.0357971
100.104	16.6875	0.240976	0.191527	0.214232	0.11655	0.128741	0.262762	0.0985995	0.037731	0.0319251
100.104	16.7292	0.170007	0.152687	0.190845	0.110698	0.135277	0.253602	0.101127	0.0371164	0.0264858
100.104	16.7708	0.131466	0.131424	0.181858	0.110663	0.140662	0.254545	0.0936494	0.0349342	0.0231429
100.104	16.8125	0.188299	0.197417	0.248336	0.140274	0.176231	0.28341	0.0970455	0.0325775	0.0214427
100.104	16.8542	0.195659	0.197809	0.234362	0.145303	0.152087	0.228142	0.0737958	0.0209247	0.0137187
100.104	16.8958	0.256859	0.253855	0.299905	0.173122	0.166698	0.240982	0.0723146	0.0184629	0.0103606
100.104	16.9375	0.322448	0.309979	0.359197	0.214605	0.185648	0.244818	0.0654054	0.0154652	0.00733929
100.104	16.9792	0.460481	0.437133	0.465959	0.268753	0.225314	0.268751	0.0732794	0.014739	0.00725357
100.104	17.0208	0.479318	0.481154	0.540583	0.333298	0.272666	0.319294	0.0951544	0.0158978	0.0079289
100.104	17.0625	0.405223	0.409123	0.515022	0.318774	0.277338	0.312371	0.085599	0.016023	0.00710307
100.104	17.1042	0.33323	0.366002	0.49968	0.315722	0.272354	0.30123	0.0754402	0.0148504	0.00644699
100.104	17.1458	0.262151	0.32864	0.491281	0.297983	0.252517	0.277732	0.069135	0.0118764	0.00553364
100.104	17.1875	0.201653	0.264563	0.439064	0.290197	0.23383	0.268108	0.0606631	0.00996899	0.00445878
100.104	17.2292	0.155321	0.216623	0.392524	0.263678	0.230265	0.249816	0.0578418	0.00930827	0.00395196
100.104	17.2708	0.0915409	0.162462	0.336887	0.234559	0.217387	0.250225	0.0579416	0.00807825	0.00339783
100.104	17.3125	0.0617676	0.120583	0.274746	0.198634	0.201253	0.241118	0.057617	0.00710358	0.00316263
100.104	17.3542	0.046201	0.0892597	0.22079	0.175929	0.183184	0.223341	0.0555966	0.0066518	0.00302195
100.104	17.3958	0.034471	0.0685694	0.199819	0.165338	0.165117	0.214428	0.0457762	0.00599463	0.00270313
100.104	17.4375	0.0356539	0.0644742	0.186485	0.161594	0.174207	0.205946	0.0486841	0.00604508	0.00253181
100.104	17.4792	0.0375192	0.0671748	0.170935	0.158739	0.180109	0.219397	0.0505091	0.00715881	0.00261842
100.104	17.5208	0.0371531	0.0668878	0.175491	0.16347	0.175997	0.21963	0.0504885	0.00764077	0.00325645
100.104	17.5625	0.0331866	0.0689631	0.177157	0.153597	0.175664	0.213129	0.0570061	0.00861815	0.00416083
100.104	17.6042	0.0278496	0.0522629	0.139336	0.115252	0.1301	0.1752	0.0505131	0.00828001	0.00355721
100.104	17.6458	0.0269178	0.0566792	0.148692	0.118239	0.139033	0.191912	0.0556898	0.0101513	0.00472493
100.104	17.6875	0.0268814	0.0654541	0.164599	0.142339	0.145543	0.220623	0.0615153	0.0131779	0.00620734
100.104	17.7292	0.0293839	0.0683798	0.167404	0.150555	0.166809	0.22426	0.0594932	0.0127637	0.00622671
100.104	17.7708	0.0362901	0.0740323	0.183246	0.156907	0.152943	0.214018	0.0622973	0.016252	0.00760334
100.104	17.8125	0.0385085	0.0770131	0.172486	0.13285	0.149963	0.198619	0.0660018	0.0193424	0.010141
100.104	17.8542	0.0357888	0.0657868	0.14378	0.121477	0.123231	0.171389	0.0646854	0.0209408	0.010696
100.104	17.8958	0.0398318	0.0690675	0.160833	0.110643	0.125217	0.179018	0.0869322	0.0248561	0.0142906
100.104	17.9375	0.0428975	0.0707552	0.15864	0.106008	0.117764	0.194582	0.0882929	0.0307946	0.0197754
100.104	17.9792	0.0611963	0.101077	0.207022	0.143117	0.155283	0.248255	0.122592	0.0485482	0.033141
100.104	18.0208	0.0741528	0.114032	0.232509	0.167041	0.180312	0.28368	0.140096	0.0628207	0.0449384
100.104	18.0625	0.0784111	0.115847	0.247399	0.171672	0.185703	0.274951	0.146201	0.0736095	0.0563473
100.104	18.1042	0.0816617	0.131449	0.269304	0.197075	0.195406	0.301923	0.170767	0.0924126	0.0738947
100.104	18.1458	0.0690906	0.114982	0.232123	0.161254	0.165196	0.272896	0.147712	0.0859272	0.0693491
100.104	18.1875	0.0858139	0.129883	0.254611	0.17453	0.177392	0.285461	0.168192	0.0961254	0.0915332
100.104	18.2292	0.0808649	0.111745	0.238532	0.149531	0.150121	0.255012	0.154036	0.0958164	0.0910444
100.104	18.2708	0.0770936	0.109642	0.216898	0.144302	0.142199	0.232333	0.146903	0.096927	0.100843
100.104	18.3125	0.0653013	0.0962855	0.210306	0.135278	0.134869	0.228739	0.127316	0.10414	0.10611
100.104	18.3542	0.0646222	0.0946598	0.202102	0.124249	0.132104	0.227356	0.123746	0.104131	0.123151
100.104	18.3958	0.0729866	0.103769	0.198253	0.135062	0.125256	0.248984	0.128016	0.123608	0.137893
100.104	18.4375	0.0664059	0.0938076	0.179395	0.119899	0.11716	0.219245	0.111754	0.106485	0.128291
100.104	18.4792	0.0653729	0.0891274	0.178681	0.116254	0.117754	0.227643	0.111309	0.106703	0.144945
100.104	18.5208	0.0641503	0.0893357	0.171337	0.103901	0.113465	0.229007	0.108766	0.109213	0.160349
100.104	18.5625	0.0626342	0.0828653	0.167748	0.109343	0.115551	0.216883	0.0983033	0.114396	0.156135
100.104	18.6042	0.0604953	0.0868607	0.16138	0.10358	0.11272	0.196749	0.0981933	0.119185	0.156311
100.104	18.6458	0.0646965	0.0888965	0.157865	0.0819125	0.104652	0.195303	0.0948409	0.0975035	0.144917
100.104	18.6875	0.0674084	0.0874319	0.15653	0.078932	0.101905	0.203264	0.0896563	0.089838	0.132039
100.104	18.7292	0.0552663	0.0808203	0.166114	0.078707	0.102122	0.183553	0.0804036	0.0733172	0.111397
100.104	18.7708	0.0559319	0.0852664	0.161859	0.0723568	0.10106	0.181128	0.0760907	0.0675608	0.109798
100.104	18.8125	0.0632481	0.0913019	0.168606	0.0656012	0.0926407	0.182827	0.0717307	0.0664313	0.104499
100.104	18.8542	0.0675824	0.091984	0.151498	0.0662367	0.0846846	0.174995	0.0696886	0.0654708	0.105619
100.104	18.8958	0.0633569	0.0940324	0.148673	0.0652504	0.0824766	0.166944	0.0721966	0.0630618	0.0921104
100.104	18.9375	0.0672055	0.0956025	0.147353	0.0631976	0.0816254	0.180359	0.0714036	0.0675342	0.0928012
100.104	18.9792	0.0696209	0.0959857	0.159642	0.0656162	0.0861858	0.188116	0.0776887	0.067926	0.087945
100.104	19.0208	0.0715233	0.0966831	0.162437	0.0695845	0.0896027	0.19911	0.0808685	0.0720606	0.0913161
100.104	19.0625	0.0817915	0.110899	0.168208	0.0770355	0.0938009	0.214182	0.104716	0.0785698	0.0905882
100.104	19.1042	0.0816709	0.109754	0.162009	0.0725105	0.0931602	0.231728	0.116891	0.0873491	0.0986638
100.104	19.1458	0.0766921	0.106503	0.171885	0.0714812	0.0990378	0.234787	0.121747	0.0829621	0.105225
100.104	19.1875	0.0990924	0.133229	0.202554	0.0852678	0.118279	0.278026	0.157365	0.112056	0.123522
100.104	19.2292	0.0770107	0.110257	0.183049	0.0761449	0.0995071	0.268128	0.151866	0.107799	0.113886
100.104	19.2708	0.0781612	0.119788	0.192876	0.0831579	0.104998	0.296978	0.176475	0.124803	0.124598
100.104	19.3125	0.0773381	0.113753	0.19288	0.0864121	0.111158	0.309926	0.206469	0.140376	0.13503
100.104	19.3542	0.0672807	0.108092	0.191833	0.0834664	0.111658	0.304413	0.204185	0.138581	0.11288
100.104	19.3958	0.0662789	0.103378	0.199356	0.0862557	0.109888	0.300267	0.202028	0.143254	0.121876
100.104	19.4375	0.0683077	0.108728	0.187793	0.0961641	0.118847	0.324591	0.216859	0.154773	0.12789
100.104	19.4792	0.0696868	0.107693	0.188208	0.100602	0.126515	0.338752	0.213996	0.151364	0.135702
100.104	19.5208	0.0776824	0.111277	0.19289	0.0992071	0.134146	0.333068	0.228973	0.16134	0.151354
100.104	19.5625	0.0802458	0.120738	0.207748	0.112501	0.142807	0.376076	0.239519	0.172578	0.156726
100.104	19.6042	0.0836472	0.117393	0.209759	0.119112	0.134573	0.358727	0.242749	0.175233	0.155937
100.104	19.6458	0.0904842	0.110981	0.203325	0.115699	0.126309	0.361004	0.235385	0.168832	0.160473
100.104	19.6875	0.086858	0.116766	0.201513	0.112257	0.144716	0.371103	0.255688	0.167615	0.137153
100.104	19.7292	0.092493	0.120824	0.210412	0.117479	0.15522	0.370068	0.281848	0.15965	0.120955
100.104	19.7708	0.0978109	0.130118	0.18544	0.124172	0.172161	0.392047	0.260766	0.160153	0.121624
100.104	19.8125	0.0949261	0.118618	0.196787	0.117068	0.183497	0.406451	0.262691	0.150293	0.117923
100.104	19.8542	0.096371	0.12091	0.197071	0.125961	0.206343	0.412158	0.263567	0.144298	0.11777
100.104	19.8958	0.0933307	0.113423	0.192204	0.122759	0.200948	0.432626	0.258272	0.150741	0.116401
100.104	19.9375	0.0842503	0.113685	0.206311	0.133806	0.199025	0.432255	0.278231	0.150349	0.113051
100.104	19.9792	0.0805857	0.111407	0.2065	0.139422	0.19669	0.45592	0.273519	0.151643	0.108774
100.104	20.0208	0.0799238	0.108792	0.183234	0.13181	0.18645	0.429248	0.269466	0.149709	0.10965
100.104	20.0625	0.0810168	0.108972	0.183234	0.122549	0.197754	0.367099	0.249901	0.145593	0.104181
100.104	20.1042	0.0773076	0.101302	0.170696	0.112118	0.162801	0.302316	0.194714	0.108724	0.0947081
100.104	20.1458	0.060522	0.0934961	0.150292	0.0973055	0.140606	0.257667	0.148809	0.0897952	0.0748656
100.104	20.1875	0.0595952	0.087757	0.136643	0.0939771	0.116977	0.208109	0.121038	0.0663696	0.0517948
100.104	20.2292	0.0478501	0.0789487	0.123134	0.0770012	0.0900359	0.169671	0.0870241	0.0458634	0.0422102
100.104	20.2708	0.044108	0.0702115	0.106736	0.0658746	0.0756868	0.119068	0.0577455	0.0310725	0.0287115
100.104	20.3125	0.0459889	0.06451	0.108694	0.0669623	0.0730093	0.105352	0.0496243	0.0248785	0.0248921
100.104	20.3542	0.0530029	0.0585409	0.0900104	0.0613482	0.0692856	0.087801	0.0454992	0.0248108	0.0214047
100.104	6.52083	0.0321098	0.0226705	0.022104	0.0232434	0.0132619	0.0107996	0.0125835	0.0100844	0.00854566
100.104	6.5625	0.0303921	0.0219405	0.0203835	0.0204394	0.0122484	0.00954655	0.0112431	0.0100571	0.00734054
100.104	6.60417	0.015743	0.0104444	0.00994659	0.0104532	0.00629535	0.00475771	0.0052669	0.00451027	0.00368923
100.104	6.64583	0.0314847	0.020805	0.0188567	0.022986	0.0116413	0.00838538	0.00905744	0.00836753	0.00666765
100.104	6.6875	0.0358403	0.0206874	0.0206261	0.0231183	0.0132918	0.00933707	0.00981954	0.00859482	0.00724646
100.104	6.72917	0.0187512	0.0107684	0.0104321	0.011418	0.00661618	0.00489745	0.00511396	0.00474384	0.00410965
100.104	6.77083	0.0203152	0.013293	0.0118053	0.013262	0.00777525	0.00539417	0.00614118	0.00538446	0.00435334
100.104	6.8125	0.0209895	0.0137766	0.0115135	0.0155271	0.00802622	0.00543752	0.00700089	0.00575751	0.00440068
100.104	6.85417	0.0262391	0.0157402	0.0136403	0.0174261	0.00825192	0.00571964	0.0076329	0.00637656	0.0048911
100.104	6.89583	0.0153132	0.00891529	0.00819381	0.00932975	0.00421	0.00322779	0.0046708	0.00360544	0.00280495
100.104	6.9375	0.0183022	0.0119778	0.0112029	0.0122016	0.00513643	0.00430092	0.00658055	0.00511308	0.00353642
100.104	6.97917	0.0145596	0.00825572	0.00844885	0.00874597	0.00356492	0.00324863	0.00510722	0.00370424	0.00260257
100.104	7.02083	0.0196278	0.0119455	0.0118756	0.0127587	0.00465436	0.004223	0.00675138	0.00485705	0.00341808
100.104	7.0625	0.0140674	0.00932047	0.00824447	0.00969867	0.00353938	0.00294033	0.00430869	0.00327227	0.00238111
100.104	7.10417	0.0166149	0.0101136	0.00821074	0.0107511	0.00399214	0.00292952	0.00505025	0.00315761	0.00216972
100.104	7.14583	0.021071	0.0134386	0.0117455	0.0145507	0.00600559	0.00416704	0.00702007	0.00434779	0.00297517
100.104	7.1875	0.0254561	0.0171868	0.0156563	0.0187436	0.00801228	0.00495494	0.00667257	0.00478133	0.00346596
100.104	7.22917	0.0276714	0.0193741	0.0161573	0.0205452	0.00808953	0.00479998	0.00651498	0.00463082	0.00363394
100.104	7.27083	0.0284058	0.0200291	0.0166994	0.0220735	0.00750373	0.0046836	0.00655137	0.00503668	0.00413753
100.104	7.3125	0.0316725	0.020551	0.018516	0.0225632	0.00727152	0.00483782	0.0058204	0.0052298	0.00400348
100.104	7.35417	0.033214	0.0218196	0.0216101	0.0230685	0.00757808	0.00483678	0.00619779	0.00554499	0.00410745
100.104	7.39583	0.046786	0.0321284	0.0297351	0.0311186	0.0100331	0.006256	0.00772461	0.00746377	0.00607725
100.104	7.4375	0.0475551	0.0340125	0.0321333	0.0330709	0.0106616	0.00626611	0.00793531	0.00761584	0.00642261
100.104	7.47917	0.0463248	0.034596	0.0305095	0.0300343	0.0101557	0.0064407	0.00804105	0.00763199	0.006512
100.104	7.52083	0.042448	0.0339658	0.0303265	0.0267543	0.0105441	0.00587606	0.00781884	0.00721463	0.00638535
100.104	7.5625	0.0432709	0.0348994	0.0291206	0.0280582	0.0104968	0.00617346	0.00811601	0.00719794	0.00586702
100.104	7.60417	0.0328737	0.0251447	0.0236517	0.0226723	0.00804341	0.00504667	0.00615813	0.00573257	0.00465884
100.104	7.64583	0.0442146	0.0312857	0.0279367	0.0248655	0.00988256	0.00592649	0.00736288	0.00690436	0.00609462
100.104	7.6875	0.0496408	0.0346972	0.0325536	0.0299562	0.0117425	0.00744951	0.00813465	0.00787494	0.00707986
100.104	7.72917	0.0454775	0.0376822	0.0346874	0.0318786	0.0132365	0.00730657	0.00874152	0.00881705	0.00683142
100.104	7.77083	0.0317792	0.028455	0.0294124	0.0239107	0.0096877	0.00614851	0.00739029	0.00700439	0.00530119
100.104	7.8125	0.0387502	0.0279141	0.0328593	0.024838	0.0103462	0.00674893	0.00743495	0.00719245	0.00602233
100.104	7.85417	0.0442286	0.0378824	0.0378294	0.0294274	0.0126429	0.00845707	0.00926763	0.0090416	0.00814007
100.104	7.89583	0.0381343	0.0293518	0.0288438	0.0238611	0.00974616	0.0065686	0.00737658	0.00690942	0.00658029
100.104	7.9375	0.0351683	0.0253624	0.0265562	0.0227139	0.0098885	0.00656934	0.00654836	0.00704334	0.00600324
100.104	7.97917	0.0328703	0.0226876	0.0274638	0.0230959	0.0104718	0.00655702	0.00649415	0.00687421	0.00651672
100.104	8.02083	0.0327761	0.0205388	0.0258893	0.0228236	0.0108885	0.00688118	0.00604123	0.00712534	0.00634755
100.104	8.0625	0.0321063	0.0292878	0.0331248	0.0290276	0.0119777	0.0086912	0.00846096	0.0085942	0.00771988
100.104	8.10417	0.0301278	0.0295681	0.0330079	0.0283497	0.0127593	0.00868643	0.0080856	0.00806589	0.0083517
100.104	8.14583	0.0275851	0.0297535	0.0332074	0.0273921	0.0116684	0.00882294	0.00795092	0.00844171	0.00774899
100.104	8.1875	0.0288921	0.0289907	0.0342436	0.0293446	0.0121801	0.00843632	0.00717672	0.0078535	0.00757717
100.104	8.22917	0.0275277	0.0291474	0.0371493	0.0274166	0.0125759	0.00820943	0.00788264	0.00673788	0.00782597
100.104	8.27083	0.0291779	0.033164	0.0353206	0.0274636	0.0130087	0.00826268	0.00792671	0.00725291	0.00715892
100.104	8.3125	0.0308219	0.0337394	0.0359264	0.0257158	0.0124414	0.00850161	0.00859429	0.00681897	0.00673908
100.104	8.35417	0.0313739	0.0349876	0.0342904	0.0259715	0.0132278	0.00788971	0.008358	0.00663421	0.00699921
100.104	8.39583	0.0232558	0.026986	0.0271478	0.023573	0.0110576	0.00688731	0.00593113	0.00593814	0.00568627
100.146	13.4792	0.0239144	0.0264165	0.0266302	0.0187259	0.00958597	0.00656053	0.00713575	0.00575179	0.00582956
100.146	13.5208	0.128347	0.0776055	0.0662786	0.137663	0.133966	0.0235127	0.00533916	0.00628155	0.00674579
100.146	13.5625	0.13353	0.0697182	0.0609947	0.122834	0.122551	0.0215611	0.0046845	0.00591034	0.00624969
100.146	13.6042	0.119297	0.0584625	0.0539455	0.112248	0.107999	0.0175444	0.00412839	0.00533145	0.00598716
100.146	13.6458	0.120838	0.0602253	0.0531696	0.113645	0.109223	0.0166218	0.00399514	0.00547273	0.00633566
100.146	13.6875	0.153221	0.0719798	0.0655922	0.143147	0.119534	0.0186352	0.00501498	0.00672002	0.00764587
100.146	13.7292	0.148576	0.070693	0.0614599	0.139223	0.109316	0.015355	0.00485715	0.00648214	0.00708564
100.146	13.7708	0.126251	0.05159	0.0515682	0.108418	0.0897443	0.0117965	0.00356421	0.00520566	0.00509645
100.146	13.8125	0.110894	0.0508124	0.0478296	0.108391	0.0855966	0.0111932	0.00352048	0.0048758	0.00446914
100.146	13.8542	0.124615	0.053329	0.0537103	0.119649	0.0935826	0.0124361	0.00397893	0.00519875	0.00437084
100.146	13.8958	0.141557	0.0604948	0.0660823	0.15179	0.12391	0.0165697	0.00497172	0.00664069	0.00493148
100.146	13.9375	0.142919	0.0670428	0.0662422	0.153959	0.140601	0.0174814	0.00626507	0.00783299	0.0053468
100.146	13.9792	0.130952	0.0713438	0.067169	0.156063	0.140004	0.0210642	0.00731684	0.00891826	0.00543329
100.146	14.0208	0.0967233	0.0525908	0.0564535	0.12197	0.105818	0.0182772	0.00675808	0.00656133	0.00409302
100.146	14.0625	0.119883	0.0667675	0.0722477	0.149767	0.123809	0.0231888	0.00923619	0.00836464	0.00486514
100.146	14.1042	0.095999	0.05287	0.060955	0.121117	0.101277	0.0207093	0.00913031	0.00664605	0.00399191
100.146	14.1458	0.0913464	0.0576353	0.058829	0.116722	0.0912577	0.0232167	0.00936206	0.00597512	0.00323507
100.146	14.1875	0.111592	0.0756888	0.0728455	0.144427	0.114571	0.0331812	0.0128839	0.00706184	0.00370198
100.146	14.2292	0.0889025	0.0590375	0.0603707	0.116142	0.0941827	0.0270727	0.0119141	0.00587133	0.00260961
100.146	14.2708	0.0919364	0.0604044	0.0569612	0.108952	0.0931085	0.0318938	0.014844	0.00581198	0.00262695
100.146	14.3125	0.0912115	0.0589118	0.0631713	0.0971961	0.0840359	0.0347432	0.0167009	0.00601146	0.00251943
100.146	14.3542	0.0880024	0.0610352	0.0604944	0.0963229	0.0750073	0.0363198	0.0182281	0.00621531	0.00253304
100.146	14.3958	0.0938828	0.0639274	0.0616087	0.0931683	0.0743265	0.0401666	0.0199697	0.00664314	0.00252639
100.146	14.4375	0.107932	0.0747129	0.0733542	0.118172	0.089392	0.0487041	0.0333127	0.0086449	0.00315223
100.146	14.4792	0.101801	0.0741945	0.0622739	0.104155	0.0814563	0.0545937	0.0334014	0.00847343	0.00276529
100.146	14.5208	0.0800358	0.0565	0.0508725	0.0807551	0.0685589	0.0449256	0.0284725	0.00677706	0.00223581
100.146	14.5625	0.0988049	0.0716229	0.0652606	0.102814	0.0849093	0.0563829	0.0385397	0.00941101	0.00274989
100.146	14.6042	0.100781	0.0756818	0.0729443	0.106656	0.101324	0.0626823	0.0456594	0.00971777	0.00265963
100.146	14.6458	0.106765	0.0825536	0.0746139	0.108688	0.102614	0.0755503	0.0597845	0.00914551	0.00242011
100.146	14.6875	0.0993061	0.0821618	0.0680655	0.112164	0.104723	0.076604	0.057316	0.00960252	0.00214649
100.146	14.7292	0.0925551	0.0778207	0.0639779	0.100015	0.0960737	0.0677616	0.0457513	0.00811713	0.00212358
100.146	14.7708	0.0951583	0.0808386	0.0641493	0.101737	0.0946947	0.0601777	0.034895	0.00686905	0.00193202
100.146	14.8125	0.10016	0.0744096	0.0628796	0.100435	0.0962324	0.0540501	0.029616	0.00535712	0.00199215
100.146	14.8542	0.103532	0.0787605	0.0675058	0.0999455	0.0980081	0.0569649	0.0265102	0.00532408	0.00194286
100.146	14.8958	0.108644	0.0753545	0.0638896	0.101335	0.106689	0.0521643	0.0237098	0.00465559	0.00179349
100.146	14.9375	0.106372	0.0803234	0.0701162	0.117401	0.115574	0.0496841	0.0210911	0.00427136	0.00176046
100.146	14.9792	0.098823	0.0834652	0.0689348	0.116107	0.1168	0.0497299	0.0201658	0.00444781	0.00174611
100.146	15.0208	0.0978264	0.0808748	0.065468	0.124984	0.112899	0.0471101	0.020639	0.00430422	0.0018096
100.146	15.0625	0.100255	0.0791032	0.0640702	0.129926	0.116499	0.043314	0.0185492	0.00406746	0.00193004
100.146	15.1042	0.0959095	0.0818463	0.0684742	0.147233	0.129052	0.0478811	0.0203651	0.00516169	0.00227029
100.146	15.1458	0.111029	0.0860022	0.0812965	0.174117	0.154653	0.0563417	0.0256711	0.00635304	0.00307877
100.146	15.1875	0.0796603	0.066184	0.0635868	0.144243	0.129056	0.0455123	0.02354	0.00626385	0.00320955
100.146	15.2292	0.0945304	0.079423	0.0745225	0.180692	0.168871	0.0626174	0.0370125	0.0131838	0.0066852
100.146	15.2708	0.0996923	0.0782449	0.0879734	0.224973	0.197192	0.0778545	0.0552249	0.0253202	0.0124696
100.146	15.3125	0.119059	0.0851564	0.096565	0.282428	0.237612	0.100134	0.092219	0.052501	0.0280542
100.146	15.3542	0.135103	0.0962888	0.106078	0.312118	0.279548	0.130234	0.13763	0.0957152	0.0557259
100.146	15.3958	0.129868	0.0982972	0.113648	0.339011	0.327016	0.17341	0.188805	0.158503	0.11084
100.146	15.4375	0.119735	0.106086	0.122421	0.36777	0.361166	0.208433	0.260642	0.225812	0.184301
100.146	15.4792	0.113072	0.0932729	0.122336	0.374186	0.356911	0.199392	0.259556	0.24409	0.214188
100.146	15.5208	0.12715	0.105679	0.132054	0.41948	0.409325	0.221671	0.321274	0.317831	0.28823
100.146	15.5625	0.163262	0.127813	0.146113	0.471583	0.431077	0.28108	0.366193	0.391958	0.340483
100.146	15.6042	0.164798	0.11452	0.121533	0.390051	0.377252	0.232836	0.319942	0.312642	0.282522
100.146	15.6458	0.207353	0.128682	0.123322	0.398503	0.360626	0.218003	0.330144	0.315924	0.268025
100.146	15.6875	0.258972	0.154225	0.12686	0.37282	0.345434	0.214846	0.299793	0.2875	0.237507
100.146	15.7292	0.284153	0.178361	0.143135	0.356878	0.33046	0.210381	0.302122	0.246538	0.206421
100.146	15.7708	0.410154	0.256231	0.196756	0.396607	0.35549	0.27075	0.297772	0.261796	0.23729
100.146	15.8125	0.486657	0.314971	0.210541	0.391766	0.381597	0.271769	0.290999	0.248417	0.214886
100.146	15.8542	0.591004	0.374844	0.246896	0.382679	0.380033	0.270368	0.265208	0.224724	0.186769
100.146	15.8958	0.664145	0.446585	0.288412	0.399043	0.368888	0.276338	0.25499	0.191076	0.164977
100.146	15.9375	0.682723	0.455771	0.302226	0.357469	0.345986	0.270014	0.238196	0.161257	0.146568
100.146	15.9792	0.710563	0.466103	0.308837	0.331749	0.319057	0.29336	0.239033	0.157978	0.13476
100.146	16.0208	0.735067	0.488984	0.304864	0.291862	0.290112	0.305934	0.241062	0.132806	0.111298
100.146	16.0625	0.767602	0.50224	0.324257	0.277054	0.264214	0.323094	0.21134	0.130792	0.107652
100.146	16.1042	0.760891	0.510606	0.294848	0.219556	0.206363	0.314923	0.178734	0.103684	0.0850707
100.146	16.1458	0.727956	0.444951	0.264047	0.176433	0.188512	0.299042	0.160144	0.0889201	0.078214
100.146	16.1875	0.447295	0.226868	0.151902	0.114091	0.133046	0.256029	0.13894	0.0811414	0.0705449
100.146	16.2292	0.197601	0.0972802	0.0810601	0.0757243	0.09144	0.222325	0.124019	0.0734569	0.0692735
100.146	16.2708	0.0686371	0.0366298	0.0438224	0.0440175	0.0653786	0.182685	0.0990532	0.0620593	0.0551948
100.146	16.3125	0.0220009	0.0145074	0.0230591	0.0258274	0.0464541	0.155432	0.0803268	0.0512469	0.0526075
100.146	16.3542	0.0131015	0.00975164	0.0182144	0.0197276	0.0396651	0.138651	0.0678231	0.0463743	0.0511332
100.146	16.3958	0.0239437	0.017174	0.0284632	0.024519	0.0479067	0.149833	0.0739982	0.0474492	0.052042
100.146	16.4375	0.0521876	0.0324861	0.0459272	0.0336723	0.0528806	0.161434	0.0709711	0.0513756	0.053559
100.146	16.4792	0.126339	0.0704179	0.0784584	0.0429011	0.0546046	0.18629	0.0821211	0.0535029	0.060209
100.146	16.5208	0.267919	0.146796	0.13091	0.0581585	0.0703222	0.213556	0.0927624	0.0618314	0.0619045
100.146	16.5625	0.360341	0.209623	0.155581	0.0702899	0.0767928	0.205105	0.09546	0.05103	0.059333
100.146	16.6042	0.406392	0.241895	0.195477	0.0851106	0.0836832	0.207704	0.0903577	0.0489263	0.0398846
100.146	16.6458	0.33781	0.215998	0.19127	0.0872012	0.088242	0.214815	0.0841626	0.0435886	0.0355234
100.146	16.6875	0.281956	0.206761	0.21786	0.106069	0.122091	0.242478	0.104158	0.0465046	0.0401115
100.146	16.7292	0.197263	0.165119	0.194163	0.101828	0.129137	0.239962	0.101732	0.0437986	0.0348607
100.146	16.7708	0.129116	0.121466	0.163199	0.0946718	0.128425	0.232526	0.0977647	0.0410537	0.0302774
100.146	16.8125	0.078166	0.0864181	0.141354	0.0835364	0.113129	0.217586	0.0846664	0.0345738	0.022994
100.146	16.8542	0.090077	0.103097	0.165306	0.0955784	0.118838	0.211652	0.0754584	0.0243684	0.0177193
100.146	16.8958	0.122674	0.139042	0.198804	0.124781	0.140785	0.223334	0.0703734	0.0217616	0.0141144
100.146	16.9375	0.165126	0.18544	0.251534	0.150456	0.155074	0.226324	0.0683321	0.0182313	0.011587
100.146	16.9792	0.235372	0.25057	0.311468	0.197004	0.165742	0.245717	0.0700234	0.0164321	0.00846389
100.146	17.0208	0.466975	0.462526	0.491404	0.307494	0.276359	0.350172	0.101276	0.02012	0.012075
100.146	17.0625	0.472123	0.478519	0.552093	0.341259	0.284959	0.335693	0.0977875	0.0186933	0.0103368
100.146	17.1042	0.397413	0.410784	0.54121	0.346654	0.277394	0.330201	0.0900305	0.0183908	0.00956186
100.146	17.1458	0.320644	0.360179	0.502821	0.319821	0.252323	0.308598	0.0846737	0.0155891	0.00824539
100.146	17.1875	0.256603	0.310927	0.477577	0.303398	0.262615	0.282444	0.0785437	0.0134046	0.00695448
100.146	17.2292	0.194765	0.283474	0.479991	0.289699	0.254956	0.291488	0.0721901	0.0121598	0.00566177
100.146	17.2708	0.147412	0.241664	0.426436	0.276166	0.248925	0.29191	0.0684045	0.0115582	0.00518407
100.146	17.3125	0.0987038	0.176786	0.333614	0.239674	0.242188	0.281075	0.0658523	0.0104446	0.00471762
100.146	17.3542	0.051344	0.0934868	0.2466	0.172085	0.176087	0.223211	0.0515712	0.00740685	0.0033779
100.146	17.3958	0.0424741	0.0864688	0.221502	0.167795	0.202864	0.246978	0.0605678	0.00752919	0.00342473
100.146	17.4375	0.0383331	0.0694805	0.20499	0.16587	0.180132	0.248966	0.0610749	0.0079902	0.00326836
100.146	17.4792	0.0320014	0.0604497	0.175726	0.148197	0.17112	0.235105	0.0581526	0.0073676	0.00318631
100.146	17.5208	0.0320513	0.0560907	0.177578	0.144897	0.175157	0.225804	0.0582055	0.0083974	0.00312816
100.146	17.5625	0.0316118	0.0598665	0.184853	0.149202	0.177831	0.237699	0.0620481	0.00977315	0.00387652
100.146	17.6042	0.0285851	0.0524831	0.16261	0.125647	0.147082	0.209517	0.0613383	0.00920096	0.00382329
100.146	17.6458	0.0306258	0.0621564	0.168556	0.13609	0.164736	0.240428	0.0700801	0.0125384	0.00545444
100.146	17.6875	0.0239941	0.0494279	0.130446	0.105275	0.128611	0.194781	0.0594456	0.0122794	0.00519485
100.146	17.7292	0.0320147	0.0648034	0.162882	0.125433	0.158007	0.22432	0.070082	0.0145408	0.00706471
100.146	17.7708	0.0280941	0.0569012	0.150696	0.134676	0.148563	0.196918	0.0553674	0.0131333	0.00612014
100.146	17.8125	0.0330207	0.0700447	0.152903	0.132752	0.146435	0.195557	0.0582138	0.0147596	0.00758639
100.146	17.8542	0.0314635	0.0568484	0.137077	0.112258	0.123659	0.167338	0.060427	0.0151337	0.00774872
100.146	17.8958	0.038394	0.0649886	0.140725	0.114809	0.124685	0.181557	0.0638559	0.0205424	0.00980385
100.146	17.9375	0.0405768	0.0766648	0.153064	0.10994	0.11554	0.20013	0.079019	0.0232655	0.0141062
100.146	17.9792	0.0420744	0.0809139	0.156757	0.111196	0.132466	0.206545	0.0884383	0.0298545	0.0184571
100.146	18.0208	0.0455103	0.0746735	0.154404	0.120175	0.122539	0.210181	0.0887686	0.0357238	0.0250536
100.146	18.0625	0.0677604	0.106064	0.227343	0.160214	0.173111	0.280478	0.129743	0.055454	0.0387109
100.146	18.1042	0.0767533	0.116303	0.244756	0.166782	0.190707	0.290963	0.138359	0.0669975	0.0493942
100.146	18.1458	0.0748711	0.129493	0.259793	0.172171	0.198676	0.295998	0.152391	0.0829481	0.0594943
100.146	18.1875	0.0685036	0.114928	0.212781	0.150149	0.154589	0.271573	0.134596	0.0840708	0.0605496
100.146	18.2292	0.104437	0.156611	0.286651	0.202089	0.223552	0.343645	0.18837	0.124673	0.105896
100.146	18.2708	0.113488	0.164497	0.305731	0.222393	0.233386	0.338336	0.212339	0.137818	0.134889
100.146	18.3125	0.0904347	0.137594	0.247713	0.167193	0.186114	0.29764	0.175485	0.123457	0.117498
100.146	18.3542	0.0859703	0.127948	0.251599	0.16171	0.171338	0.280501	0.163137	0.124236	0.128665
100.146	18.3958	0.0997562	0.15748	0.295434	0.191516	0.204996	0.32841	0.183427	0.157656	0.154124
100.146	18.4375	0.0934252	0.150104	0.287829	0.172573	0.196292	0.307485	0.159853	0.148353	0.166273
100.146	18.4792	0.102464	0.155683	0.280055	0.170191	0.189011	0.327379	0.152424	0.155221	0.181061
100.146	18.5208	0.0899769	0.116289	0.21588	0.144424	0.152246	0.276649	0.13471	0.135317	0.167426
100.146	18.5625	0.0756076	0.114939	0.217468	0.140621	0.145048	0.269748	0.125282	0.133747	0.166303
100.146	18.6042	0.0730488	0.0988098	0.170305	0.116674	0.129608	0.23975	0.105188	0.124373	0.154559
100.146	18.6458	0.0783044	0.109601	0.208166	0.127633	0.152988	0.257779	0.128432	0.135947	0.170875
100.146	18.6875	0.0682235	0.0920977	0.186482	0.100277	0.123568	0.232451	0.111285	0.111262	0.147048
100.146	18.7292	0.0646791	0.0874468	0.18329	0.0953208	0.121607	0.225134	0.105142	0.0999246	0.13926
100.146	18.7708	0.0651979	0.0873414	0.192717	0.095378	0.116021	0.217073	0.102557	0.0927547	0.14126
100.146	18.8125	0.0627326	0.0936058	0.18808	0.0949483	0.109483	0.213483	0.0955718	0.0860952	0.130434
100.146	18.8542	0.0675249	0.100987	0.177486	0.0793584	0.111702	0.229175	0.0961459	0.0839069	0.12042
100.146	18.8958	0.0744447	0.101743	0.176545	0.0807523	0.0979912	0.229578	0.0991275	0.0897613	0.118083
100.146	18.9375	0.0680476	0.095436	0.170562	0.070329	0.0998563	0.22202	0.108529	0.0840803	0.110373
100.146	18.9792	0.0648313	0.0918219	0.164429	0.0747213	0.0925714	0.217435	0.104161	0.0827692	0.0979979
100.146	19.0208	0.0709648	0.0967075	0.151923	0.0696715	0.0904677	0.201446	0.0921269	0.0802842	0.0950963
100.146	19.0625	0.0715957	0.0944796	0.168323	0.0750671	0.0919782	0.210767	0.105186	0.0816812	0.095709
100.146	19.1042	0.0758608	0.101833	0.16555	0.0778715	0.102176	0.233385	0.114511	0.0891572	0.102169
100.146	19.1458	0.0817073	0.105756	0.1796	0.0782967	0.102334	0.256802	0.125218	0.0944537	0.10755
100.146	19.1875	0.0835486	0.111532	0.180407	0.0769922	0.106363	0.275146	0.137297	0.0946221	0.11761
100.146	19.2292	0.0850439	0.115661	0.1795	0.0788723	0.104974	0.282373	0.150552	0.105624	0.122918
100.146	19.2708	0.0814183	0.113857	0.197191	0.0855919	0.108286	0.30483	0.172279	0.116903	0.127972
100.146	19.3125	0.08035	0.119217	0.202664	0.085495	0.111865	0.304444	0.200661	0.135594	0.141935
100.146	19.3542	0.0707663	0.104573	0.173231	0.0766232	0.0999545	0.289542	0.189893	0.126584	0.126785
100.146	19.3958	0.0753752	0.118624	0.197347	0.086485	0.116664	0.319623	0.218235	0.138024	0.148397
100.146	19.4375	0.0849521	0.134045	0.242169	0.110053	0.133903	0.361854	0.250546	0.16859	0.159456
100.146	19.4792	0.0852739	0.130785	0.240589	0.114894	0.143222	0.378592	0.265413	0.18515	0.161395
100.146	19.5208	0.0934143	0.137004	0.2351	0.127446	0.160454	0.407712	0.261392	0.19441	0.182511
100.146	19.5625	0.0971767	0.145594	0.259092	0.133486	0.169084	0.414415	0.277142	0.187582	0.175891
100.146	19.6042	0.104649	0.151642	0.283348	0.144782	0.171047	0.447582	0.322112	0.20646	0.186647
100.146	19.6458	0.105255	0.152263	0.273792	0.144385	0.163704	0.419454	0.323294	0.21087	0.190562
100.146	19.6875	0.0846271	0.117248	0.21372	0.112818	0.141014	0.382454	0.264363	0.18063	0.146783
100.146	19.7292	0.102824	0.132521	0.251848	0.128721	0.169457	0.444987	0.299562	0.203835	0.174683
100.146	19.7708	0.114152	0.150154	0.235358	0.143184	0.199455	0.437733	0.302782	0.201246	0.167027
100.146	19.8125	0.111448	0.156435	0.232002	0.147601	0.21941	0.418976	0.284471	0.189798	0.159934
100.146	19.8542	0.0906095	0.120306	0.189384	0.113969	0.183285	0.381155	0.23388	0.143674	0.118906
100.146	19.8958	0.09294	0.111843	0.19125	0.117622	0.194084	0.394392	0.253454	0.141839	0.117733
100.146	19.9375	0.0911964	0.103649	0.194626	0.119502	0.180355	0.409444	0.237352	0.134977	0.113152
100.146	19.9792	0.0783714	0.107157	0.211395	0.1246	0.178338	0.419557	0.238017	0.140143	0.116627
100.146	20.0208	0.0716188	0.106946	0.189052	0.129004	0.176055	0.371284	0.243087	0.136478	0.109418
100.146	20.0625	0.0772428	0.106267	0.182299	0.114144	0.170177	0.373665	0.241196	0.133681	0.109079
100.146	20.1042	0.0757294	0.0964876	0.163777	0.118484	0.172309	0.364547	0.228665	0.134785	0.104002
100.146	20.1458	0.0757828	0.095829	0.155406	0.106399	0.145847	0.287358	0.177037	0.106517	0.0820136
100.146	20.1875	0.0615982	0.0863561	0.140059	0.0973946	0.124575	0.241969	0.153671	0.0834602	0.061149
100.146	20.2292	0.0548622	0.0793848	0.127527	0.0847513	0.104837	0.193257	0.116992	0.0627555	0.0505188
100.146	20.2708	0.0461876	0.0724577	0.10929	0.0782989	0.0871193	0.148162	0.0829367	0.0439647	0.0347136
100.146	20.3125	0.043476	0.0713341	0.110813	0.0672962	0.0790272	0.110339	0.0532197	0.0295069	0.026248
100.146	20.3542	0.0430307	0.0645145	0.111566	0.0658567	0.0747341	0.0952236	0.0428009	0.0204768	0.020993
100.146	20.3958	0.0445871	0.0562353	0.0894272	0.0593358	0.0597341	0.0747496	0.0315235	0.0202565	0.018338
100.146	20.4375	0.0488702	0.0568812	0.0729531	0.0447684	0.0478627	0.0551776	0.0267563	0.0174321	0.0174113
100.146	20.4792	0.0464427	0.0532835	0.061248	0.0452185	0.0379923	0.0425536	0.0218306	0.0146574	0.0135735
100.146	6.47917	0.0419651	0.0517454	0.047983	0.032622	0.0303981	0.0358828	0.0179234	0.0127626	0.0117502
100.146	6.52083	0.0132308	0.0102834	0.00943631	0.0126721	0.00679254	0.00644111	0.00736013	0.00560175	0.00492313
100.146	6.5625	0.0131078	0.00890724	0.00868648	0.0103811	0.00559399	0.0051331	0.0059987	0.00471271	0.00395203
100.146	6.60417	0.0201431	0.0137616	0.0119811	0.0123819	0.00781702	0.00667147	0.00783806	0.00638303	0.00502012
100.146	6.64583	0.0152747	0.00940924	0.00922727	0.00987469	0.00558283	0.00472102	0.0054208	0.00470654	0.00382786
100.146	6.6875	0.0151335	0.00864902	0.00784764	0.00937141	0.00529983	0.00438058	0.0047286	0.0041125	0.00371338
100.146	6.72917	0.0179506	0.0104735	0.00977654	0.0118333	0.00671359	0.00506699	0.00600046	0.0053191	0.00437081
100.146	6.77083	0.0158089	0.00817485	0.00787592	0.00892227	0.00514251	0.0037985	0.00516707	0.00442902	0.00378696
100.146	6.8125	0.0235428	0.0125531	0.0115535	0.0133696	0.00795632	0.00631255	0.0083495	0.00693499	0.00530028
100.146	6.85417	0.011806	0.00758523	0.00633391	0.00829263	0.00432011	0.0032635	0.00485218	0.0038612	0.00283058
100.146	6.89583	0.019652	0.0127834	0.0107931	0.0131335	0.00741857	0.00506798	0.00793643	0.00627325	0.00472121
100.146	6.9375	0.0210834	0.013035	0.0116944	0.0127379	0.00765853	0.00490992	0.00784072	0.00640834	0.00457989
100.146	6.97917	0.0131466	0.00752092	0.00678847	0.00839923	0.00402871	0.00317779	0.00538078	0.00358076	0.00270917
100.146	7.02083	0.0176753	0.0107657	0.0094702	0.0114089	0.00509364	0.00443654	0.00656477	0.00479719	0.00365085
100.146	7.0625	0.0234923	0.0138665	0.0124372	0.0144054	0.00692522	0.00571481	0.00791862	0.00611119	0.00419414
100.146	7.10417	0.0225044	0.0136661	0.0114359	0.0145748	0.00608916	0.00547221	0.00827132	0.00584348	0.00356871
100.146	7.14583	0.0251121	0.0155813	0.0118778	0.01508	0.00693887	0.00599802	0.00861252	0.00577683	0.00377819
100.146	7.1875	0.0267602	0.0165729	0.0132413	0.0162405	0.00759733	0.00576717	0.00824459	0.00587639	0.00380905
100.146	7.22917	0.0269281	0.0169898	0.0146401	0.018896	0.00809627	0.00538172	0.00780031	0.00525052	0.00368088
100.146	7.27083	0.029984	0.0187196	0.0163113	0.0222862	0.0087578	0.00543757	0.0071721	0.00534652	0.00409698
100.146	7.3125	0.0391849	0.0252152	0.0241041	0.03046	0.0110992	0.00716844	0.00809484	0.00696486	0.00531615
100.146	7.35417	0.0371932	0.0278444	0.0247716	0.0335086	0.011286	0.00704644	0.00820667	0.00674408	0.00505522
100.146	7.39583	0.0409669	0.0305258	0.0303587	0.0318628	0.0117703	0.00631325	0.00801466	0.00689389	0.00543833
100.146	7.4375	0.0319946	0.0245105	0.0220449	0.0262249	0.00924984	0.00489448	0.00599588	0.00554353	0.00428106
100.146	7.47917	0.0431189	0.0317038	0.0275882	0.0307896	0.0111848	0.00642107	0.00841351	0.00707091	0.00566721
100.146	7.52083	0.0436801	0.0287795	0.0267039	0.026744	0.0117024	0.00665751	0.00795584	0.00719811	0.00592609
100.146	7.5625	0.0348867	0.0234251	0.021023	0.0219591	0.00888957	0.0054096	0.00621886	0.00548059	0.00538069
100.146	7.60417	0.04795	0.0308223	0.0282951	0.0305747	0.0125111	0.00754709	0.00870302	0.00789358	0.00662766
100.146	7.64583	0.047729	0.0320612	0.0288658	0.0297932	0.0120467	0.00669393	0.00945834	0.00820172	0.0067947
100.146	7.6875	0.0353578	0.029209	0.0247416	0.026405	0.010193	0.00644777	0.00827166	0.00758627	0.00602301
100.146	7.72917	0.0368709	0.0270248	0.0253744	0.0258404	0.0103967	0.00615022	0.00769749	0.00704951	0.00575491
100.146	7.77083	0.0386022	0.0278926	0.0269196	0.0258757	0.0108719	0.00654521	0.00829495	0.00719287	0.00563581
100.146	7.8125	0.0344531	0.0268429	0.0290583	0.0286289	0.0111149	0.00700666	0.00905029	0.00825494	0.00613827
100.146	7.85417	0.0376229	0.0258911	0.0316443	0.0243242	0.0114872	0.00685447	0.00807859	0.00790362	0.00631531
100.146	7.89583	0.0366782	0.0264424	0.0280873	0.0230634	0.0114804	0.00680016	0.00774262	0.00731786	0.00687798
100.146	7.9375	0.036719	0.0264219	0.0259471	0.0242595	0.0114218	0.00709636	0.00740749	0.00737486	0.00712387
100.146	7.97917	0.0355714	0.0234976	0.0239219	0.0245996	0.0102769	0.00673616	0.00710661	0.00764321	0.00688329
100.146	8.02083	0.0356257	0.0234749	0.0259654	0.0242118	0.0107749	0.00659292	0.00706078	0.00723721	0.00651158
100.146	8.0625	0.0328394	0.0235299	0.0275346	0.0239938	0.0111401	0.0072472	0.00735967	0.00704049	0.0067506
100.146	8.10417	0.0326814	0.0283859	0.03321	0.028158	0.0126728	0.00884852	0.00832787	0.00811435	0.00793725
100.146	8.14583	0.0290726	0.0273469	0.0325572	0.0244855	0.0116451	0.00859499	0.00789348	0.0075069	0.00733261
100.146	8.1875	0.0262137	0.0260184	0.0318656	0.0245864	0.0116944	0.00803992	0.0073534	0.00772833	0.00793931
100.146	8.22917	0.0258461	0.0252427	0.0291236	0.026652	0.0114425	0.0089239	0.00705475	0.00783239	0.00775433
100.146	8.27083	0.0285523	0.0310772	0.0342383	0.0262123	0.0132416	0.00860134	0.00788258	0.00752639	0.00805207
100.146	8.3125	0.030253	0.0323245	0.0352677	0.0285321	0.0128483	0.00918987	0.00903607	0.00798637	0.00863069
100.146	8.35417	0.031043	0.0315786	0.0390598	0.0259949	0.0128072	0.0092414	0.00965167	0.00730089	0.00786271
100.188	13.4792	0.114047	0.0627472	0.050509	0.115761	0.124039	0.0199546	0.00436301	0.00488233	0.00549755
100.188	13.5208	0.126138	0.0625923	0.0513941	0.118971	0.123621	0.0189416	0.00438181	0.0051733	0.0055975
100.188	13.5625	0.114212	0.0533646	0.0488511	0.113177	0.113227	0.0171128	0.00385655	0.00474182	0.0053053
100.188	13.6042	0.132111	0.0553452	0.0506201	0.123272	0.115713	0.0167701	0.00398548	0.00512456	0.00569034
100.188	13.6458	0.154376	0.0707354	0.060277	0.150144	0.127557	0.0178638	0.0047611	0.00631788	0.00645148
100.188	13.6875	0.117489	0.0500168	0.0439526	0.119112	0.0895667	0.0106496	0.00329314	0.00502244	0.00451054
100.188	13.7292	0.137379	0.0577538	0.0529286	0.14228	0.100834	0.0136999	0.00384616	0.00554644	0.00523504
100.188	13.7708	0.129146	0.0534752	0.0490301	0.118901	0.090859	0.01153	0.00348714	0.00475911	0.00444426
100.188	13.8125	0.100941	0.0390762	0.0397512	0.0986391	0.0750075	0.00885035	0.00284111	0.00380959	0.00309081
100.188	13.8542	0.154929	0.0567878	0.0615005	0.14762	0.106976	0.0137063	0.00462308	0.0057345	0.00460025
100.188	13.8958	0.150446	0.0642013	0.0603704	0.14996	0.124162	0.0142196	0.00516463	0.00643697	0.00447
100.188	13.9375	0.113491	0.0536242	0.0500363	0.119498	0.0997209	0.0136915	0.00488163	0.00588799	0.00392135
100.188	13.9792	0.112808	0.0677804	0.0689477	0.157152	0.131202	0.0210727	0.00717534	0.00734616	0.00506487
100.188	14.0208	0.116282	0.063886	0.0659166	0.153237	0.126854	0.0224987	0.00833606	0.00711921	0.00461257
100.188	14.0625	0.0922329	0.0505175	0.0572626	0.121578	0.0947329	0.0191418	0.00755988	0.00526976	0.00301719
100.188	14.1042	0.0931614	0.0561558	0.0561508	0.122543	0.0865316	0.0201272	0.00828204	0.00523565	0.00278052
100.188	14.1458	0.0914351	0.0617638	0.0562964	0.123418	0.0857203	0.0229655	0.0093872	0.00516005	0.00259676
100.188	14.1875	0.0877328	0.0576844	0.0580886	0.114106	0.0801288	0.0248594	0.0100607	0.00530656	0.00245039
100.188	14.2292	0.0906876	0.0580457	0.0551295	0.11407	0.0867602	0.0279627	0.0117805	0.00540091	0.00244024
100.188	14.2708	0.0933827	0.056224	0.0593837	0.107082	0.0830518	0.0310033	0.0138522	0.0053871	0.00239933
100.188	14.3125	0.0975357	0.0599211	0.0621654	0.10222	0.076156	0.0332729	0.0159017	0.00573362	0.00249639
100.188	14.3542	0.0915796	0.0619689	0.0637127	0.0934717	0.0691773	0.033451	0.0177667	0.00578222	0.00228201
100.188	14.3958	0.0791146	0.056155	0.0515486	0.0777314	0.0626821	0.0348389	0.0193476	0.00558264	0.00196207
100.188	14.4375	0.0863773	0.0631698	0.0551157	0.0834248	0.0696544	0.0464413	0.0258694	0.00626665	0.00231473
100.188	14.4792	0.102294	0.0763352	0.0670572	0.101014	0.0883687	0.0511134	0.0304086	0.00780116	0.00266663
100.188	14.5208	0.111088	0.078715	0.0777304	0.109715	0.0923865	0.0561902	0.0368687	0.00904621	0.00268908
100.188	14.5625	0.11331	0.0818044	0.0764003	0.115493	0.0984253	0.0610685	0.044821	0.00928269	0.00259924
100.188	14.6042	0.103538	0.0839594	0.0706682	0.115856	0.102731	0.069023	0.0512035	0.00867985	0.00232171
100.188	14.6458	0.105375	0.0853762	0.0717086	0.119181	0.10498	0.0760617	0.0574678	0.00972035	0.00245689
100.188	14.6875	0.107569	0.0854761	0.0703395	0.119742	0.110849	0.0714642	0.0455288	0.0087739	0.00242799
100.188	14.7292	0.101463	0.0851822	0.0731199	0.111919	0.103437	0.0597527	0.0362729	0.00760179	0.00231831
100.188	14.7708	0.0961235	0.0801067	0.0644708	0.101078	0.102032	0.0529459	0.0262292	0.0059172	0.00202194
100.188	14.8125	0.0978042	0.0773488	0.0612706	0.0992623	0.0968357	0.0490191	0.0213165	0.00480581	0.00203841
100.188	14.8542	0.111024	0.078275	0.0643765	0.105982	0.107967	0.0501473	0.0208694	0.0047111	0.00215713
100.188	14.8958	0.112679	0.0790526	0.071834	0.120808	0.11668	0.0489792	0.0186509	0.00440674	0.00198275
100.188	14.9375	0.110924	0.0800182	0.0703502	0.133452	0.119239	0.047173	0.0171553	0.00401404	0.00174508
100.188	14.9792	0.113042	0.0809894	0.0660484	0.13428	0.117991	0.0463766	0.0173917	0.00397097	0.00188198
100.188	15.0208	0.103649	0.0796805	0.068754	0.142199	0.120339	0.0443584	0.0173489	0.00446383	0.00205461
100.188	15.0625	0.0936931	0.0777145	0.0728123	0.149049	0.13385	0.0456541	0.0194747	0.00503125	0.00225036
100.188	15.1042	0.100796	0.0743002	0.0777216	0.166455	0.150566	0.0512424	0.0215456	0.00571657	0.00268399
100.188	15.1458	0.0906857	0.0648535	0.0675551	0.155296	0.131081	0.044764	0.0212873	0.00555218	0.00271175
100.188	15.1875	0.0806877	0.0617331	0.063541	0.159856	0.139383	0.0491418	0.0291815	0.00910265	0.00452825
100.188	15.2292	0.0928728	0.068667	0.0851141	0.222833	0.191053	0.0775413	0.0480455	0.0201405	0.0100244
100.188	15.2708	0.0839122	0.0634875	0.075823	0.234347	0.213736	0.0842558	0.0642774	0.0352809	0.0174402
100.188	15.3125	0.117751	0.0846423	0.0994717	0.322053	0.269699	0.109641	0.114448	0.0699382	0.0394507
100.188	15.3542	0.0949925	0.0806862	0.0968488	0.295827	0.2771	0.130036	0.136905	0.0966422	0.0594448
100.188	15.3958	0.103467	0.0875191	0.101798	0.344168	0.327008	0.155116	0.190348	0.154777	0.115525
100.188	15.4375	0.0971184	0.0875156	0.105671	0.354844	0.332758	0.168026	0.212514	0.182131	0.148725
100.188	15.4792	0.110482	0.0840038	0.105707	0.343302	0.336235	0.169933	0.241659	0.22142	0.167983
100.188	15.5208	0.13516	0.0972887	0.11611	0.378668	0.399239	0.194712	0.265734	0.27886	0.222904
100.188	15.5625	0.157052	0.105221	0.116448	0.368498	0.348012	0.201444	0.264584	0.249897	0.234224
100.188	15.6042	0.208928	0.126016	0.130663	0.371342	0.365354	0.202304	0.284531	0.254047	0.21853
100.188	15.6458	0.244167	0.154832	0.129514	0.34816	0.337225	0.201071	0.264538	0.248843	0.204781
100.188	15.6875	0.340287	0.215083	0.165655	0.386646	0.375391	0.247851	0.299447	0.249683	0.200373
100.188	15.7292	0.36367	0.233876	0.161616	0.342513	0.319949	0.21008	0.242633	0.186036	0.169105
100.188	15.7708	0.482089	0.289962	0.197874	0.338198	0.330835	0.234689	0.228533	0.184903	0.162903
100.188	15.8125	0.569904	0.345179	0.22811	0.339531	0.306556	0.220194	0.212693	0.171062	0.139641
100.188	15.8542	0.70143	0.464275	0.310585	0.402518	0.360594	0.266992	0.243477	0.166355	0.142661
100.188	15.8958	0.76408	0.527801	0.31996	0.371324	0.354634	0.277177	0.237198	0.151333	0.135535
100.188	15.9375	0.786909	0.553145	0.332782	0.372876	0.327092	0.2999	0.222321	0.138864	0.11941
100.188	15.9792	0.816257	0.565785	0.343604	0.333546	0.297822	0.31539	0.225911	0.137336	0.111394
100.188	16.0208	0.812156	0.549373	0.314684	0.256088	0.243188	0.283671	0.180523	0.10975	0.0868417
100.188	16.0625	0.836835	0.576781	0.324014	0.241054	0.225167	0.296141	0.163512	0.0993933	0.085539
100.188	16.1042	0.804111	0.525955	0.296335	0.186393	0.179562	0.290978	0.145662	0.0866079	0.0771646
100.188	16.1458	0.561302	0.292356	0.181305	0.123855	0.13401	0.242208	0.137425	0.0764281	0.0645285
100.188	16.1875	0.284674	0.131933	0.102508	0.0814657	0.0960938	0.204712	0.108295	0.0692197	0.0612348
100.188	16.2292	0.108827	0.0534158	0.0542993	0.048908	0.0696009	0.171344	0.0859103	0.0568483	0.0566514
100.188	16.2708	0.0357374	0.0212994	0.0279772	0.0290084	0.0462089	0.141223	0.0723703	0.050274	0.048463
100.188	16.3125	0.0301576	0.0189344	0.027136	0.0263895	0.0436873	0.145067	0.0716369	0.046582	0.0473427
100.188	16.3542	0.0564554	0.0327402	0.0422772	0.0333124	0.0513839	0.155493	0.0723254	0.046451	0.0494573
100.188	16.3958	0.0977214	0.055745	0.0594206	0.0377218	0.0524613	0.164803	0.0727874	0.0468558	0.0495793
100.188	16.4375	0.166674	0.0936081	0.0835055	0.0462644	0.0543621	0.165405	0.0732669	0.04821	0.0545239
100.188	16.4792	0.30843	0.1757	0.134489	0.0646623	0.0748068	0.206828	0.0933488	0.0561899	0.0666947
100.188	16.5208	0.485697	0.273527	0.209188	0.0861901	0.085555	0.219652	0.0975099	0.0569187	0.0672951
100.188	16.5625	0.416509	0.25461	0.211829	0.0909051	0.087566	0.222547	0.0981663	0.0547607	0.0545937
100.188	16.6042	0.316923	0.20898	0.198056	0.0938077	0.0946028	0.228874	0.0982362	0.0514487	0.0484364
100.188	16.6458	0.22953	0.169439	0.185128	0.0950249	0.1029	0.228212	0.0998088	0.0449528	0.0393026
100.188	16.6875	0.158264	0.133972	0.162155	0.0928377	0.118541	0.232466	0.0984795	0.0433022	0.036688
100.188	16.7292	0.103323	0.100196	0.140203	0.0881869	0.117657	0.235102	0.0924327	0.0414505	0.0358491
100.188	16.7708	0.0602012	0.0700477	0.122945	0.0788767	0.101346	0.208183	0.0860363	0.0348738	0.0262353
100.188	16.8125	0.0645774	0.0810303	0.156751	0.105747	0.117001	0.221009	0.0898504	0.0327148	0.024661
100.188	16.8542	0.0924789	0.118677	0.19966	0.139354	0.144731	0.243913	0.0839573	0.0300759	0.0205347
100.188	16.8958	0.12589	0.155617	0.261576	0.167582	0.164133	0.25303	0.0844463	0.0238784	0.0153771
100.188	16.9375	0.230897	0.259964	0.363388	0.216279	0.21641	0.303173	0.0947948	0.0235831	0.0144365
100.188	16.9792	0.396126	0.415936	0.484798	0.298048	0.268597	0.340694	0.109739	0.0243731	0.0144939
100.188	17.0208	0.440297	0.450898	0.54205	0.346755	0.28136	0.345843	0.103979	0.0231237	0.0133
100.188	17.0625	0.372592	0.390026	0.52518	0.327685	0.270912	0.323323	0.0890189	0.0185596	0.0105866
100.188	17.1042	0.297893	0.352638	0.527968	0.312263	0.258	0.320915	0.0867734	0.0167055	0.00908539
100.188	17.1458	0.25207	0.33136	0.523197	0.300451	0.265182	0.324916	0.0883739	0.0163179	0.00922684
100.188	17.1875	0.199083	0.282283	0.480751	0.282295	0.257176	0.315713	0.0773876	0.0143985	0.0074078
100.188	17.2292	0.117759	0.192409	0.384592	0.235107	0.228443	0.27491	0.0614409	0.0121394	0.00543871
100.188	17.2708	0.0724831	0.138798	0.290199	0.217548	0.213325	0.251598	0.0599577	0.0107726	0.00514745
100.188	17.3125	0.0406657	0.0800833	0.208246	0.164867	0.164829	0.221102	0.0522188	0.00826566	0.0037835
100.188	17.3542	0.0243875	0.0500906	0.158667	0.12878	0.153488	0.202719	0.0456187	0.00741071	0.00313468
100.188	17.3958	0.0259328	0.0520361	0.150145	0.126183	0.150122	0.216374	0.0487832	0.00705248	0.00298788
100.188	17.4375	0.0261628	0.0489846	0.146467	0.118578	0.151439	0.212787	0.0515877	0.00733867	0.00307393
100.188	17.4792	0.023745	0.0457722	0.144553	0.117238	0.13921	0.217405	0.0516275	0.00733785	0.00311425
100.188	17.5208	0.0202066	0.0406984	0.128563	0.111488	0.132004	0.185736	0.0508486	0.0074535	0.00320249
100.188	17.5625	0.025052	0.0465405	0.147148	0.119883	0.160286	0.236545	0.0694955	0.0120253	0.00467589
100.188	17.6042	0.0249854	0.0460084	0.154498	0.112996	0.142025	0.240849	0.0690516	0.013916	0.0058799
100.188	17.6458	0.0325533	0.0618847	0.167848	0.122549	0.1575	0.259691	0.0864855	0.0174191	0.00830263
100.188	17.6875	0.0330612	0.0695402	0.169838	0.137943	0.158082	0.255795	0.07912	0.018112	0.00842525
100.188	17.7292	0.0238378	0.0456846	0.116198	0.100817	0.108318	0.177062	0.0483186	0.0101411	0.00490715
100.188	17.7708	0.0268906	0.0504804	0.11202	0.0963665	0.109736	0.164145	0.043485	0.0112626	0.00535182
100.188	17.8125	0.031021	0.0584161	0.129756	0.101478	0.113578	0.193921	0.0541543	0.0159975	0.00737282
100.188	17.8542	0.0390977	0.0718183	0.137927	0.0991566	0.118693	0.20622	0.0709298	0.0207836	0.0102397
100.188	17.8958	0.0420893	0.07851	0.153394	0.104504	0.120106	0.190896	0.0787034	0.0240021	0.0135059
100.188	17.9375	0.0441743	0.0769156	0.163125	0.101386	0.129041	0.210347	0.0833315	0.0291269	0.0158417
100.188	17.9792	0.0469547	0.0788532	0.165059	0.111786	0.133576	0.211866	0.0825611	0.0343184	0.0238907
100.188	18.0208	0.0531293	0.0823663	0.17179	0.114097	0.140735	0.212247	0.0931823	0.0382452	0.0262447
100.188	18.0625	0.0604523	0.093285	0.210333	0.139066	0.165841	0.249955	0.118182	0.0542627	0.0365685
100.188	18.1042	0.0704907	0.1229	0.245528	0.170438	0.188793	0.297475	0.161002	0.0769077	0.0562419
100.188	18.1458	0.0672606	0.101221	0.20813	0.147132	0.154735	0.265201	0.139568	0.0709135	0.0572027
100.188	18.1875	0.0763971	0.115367	0.201781	0.155687	0.162164	0.277378	0.145217	0.0862637	0.0735125
100.188	18.2292	0.107466	0.162157	0.29349	0.220422	0.218712	0.361992	0.204471	0.135052	0.118803
100.188	18.2708	0.1045	0.168406	0.314215	0.216845	0.233862	0.356402	0.213043	0.150184	0.131179
100.188	18.3125	0.101446	0.167229	0.308399	0.207291	0.230346	0.351037	0.202541	0.148337	0.15281
100.188	18.3542	0.0993864	0.153576	0.312483	0.181783	0.213955	0.337581	0.181823	0.154437	0.156808
100.188	18.3958	0.0986457	0.149692	0.292416	0.160659	0.189599	0.311983	0.17006	0.15404	0.159218
100.188	18.4375	0.0983915	0.136445	0.26523	0.165733	0.191515	0.302831	0.163033	0.151846	0.171305
100.188	18.4792	0.108715	0.136665	0.264784	0.172745	0.202755	0.33046	0.160692	0.156787	0.203846
100.188	18.5208	0.103329	0.136289	0.243522	0.171835	0.189802	0.32494	0.154945	0.158711	0.19914
100.188	18.5625	0.0786026	0.107399	0.180647	0.130672	0.138654	0.245781	0.117716	0.112221	0.145624
100.188	18.6042	0.0754265	0.0945828	0.201231	0.117789	0.136294	0.247551	0.114113	0.104124	0.153577
100.188	18.6458	0.0689215	0.0994797	0.201034	0.11554	0.150854	0.271332	0.119072	0.110007	0.153375
100.188	18.6875	0.0745564	0.0978146	0.21891	0.122735	0.160178	0.276676	0.126852	0.113389	0.168345
100.188	18.7292	0.0697834	0.0928822	0.203421	0.111822	0.134513	0.254627	0.11524	0.113429	0.150102
100.188	18.7708	0.0765976	0.0936427	0.199555	0.108988	0.131686	0.257733	0.119473	0.10177	0.135966
100.188	18.8125	0.078563	0.106022	0.201211	0.0949986	0.123442	0.264465	0.115726	0.102148	0.135578
100.188	18.8542	0.0756544	0.109068	0.206378	0.0897149	0.123065	0.254099	0.120349	0.100199	0.124727
100.188	18.8958	0.0730073	0.105964	0.196474	0.0919392	0.118884	0.247906	0.122212	0.100792	0.130151
100.188	18.9375	0.0642781	0.0982913	0.18039	0.0871536	0.115532	0.2285	0.121754	0.0901321	0.111324
100.188	18.9792	0.0691606	0.107566	0.172987	0.0802582	0.106971	0.223461	0.108725	0.0963749	0.109432
100.188	19.0208	0.071194	0.0994537	0.171978	0.0788022	0.0974392	0.240547	0.109635	0.101372	0.112561
100.188	19.0625	0.074306	0.0981196	0.179947	0.082967	0.113093	0.268388	0.134282	0.107633	0.11607
100.188	19.1042	0.0826847	0.109847	0.177231	0.0870448	0.115722	0.279134	0.140146	0.109498	0.130169
100.188	19.1458	0.0777958	0.116478	0.184775	0.0850872	0.119878	0.294295	0.157926	0.109531	0.124328
100.188	19.1875	0.0784559	0.11524	0.19542	0.0852435	0.119931	0.307406	0.17411	0.121047	0.13572
100.188	19.2292	0.0766804	0.112732	0.212995	0.0959102	0.124092	0.328381	0.202215	0.138279	0.151685
100.188	19.2708	0.0765284	0.112199	0.200347	0.0866945	0.122425	0.322247	0.200682	0.131365	0.143411
100.188	19.3125	0.0883151	0.127068	0.218237	0.100209	0.122967	0.343838	0.22994	0.161974	0.161475
100.188	19.3542	0.0711047	0.0997456	0.163979	0.0760841	0.095103	0.272052	0.189413	0.121492	0.134213
100.188	19.3958	0.0767604	0.10739	0.201542	0.0880382	0.114431	0.310207	0.214407	0.151706	0.141246
100.188	19.4375	0.0672059	0.0964122	0.183139	0.0886798	0.101992	0.315533	0.211482	0.161241	0.133848
100.188	19.4792	0.0888932	0.1303	0.244243	0.120702	0.14587	0.40701	0.265802	0.201505	0.178877
100.188	19.5208	0.0915325	0.140602	0.261591	0.130477	0.162291	0.404539	0.293588	0.199503	0.185121
100.188	19.5625	0.0836298	0.119189	0.225322	0.107844	0.137353	0.364652	0.261574	0.179571	0.153816
100.188	19.6042	0.0881741	0.120294	0.232427	0.109521	0.147893	0.364658	0.26397	0.194032	0.163434
100.188	19.6458	0.0815816	0.114034	0.223785	0.114771	0.15933	0.372261	0.256672	0.175397	0.154894
100.188	19.6875	0.0750607	0.100011	0.208112	0.0932823	0.127294	0.352971	0.224811	0.143219	0.123498
100.188	19.7292	0.0892215	0.121298	0.215528	0.11104	0.168742	0.388705	0.244484	0.145802	0.137408
100.188	19.7708	0.0972613	0.131543	0.199534	0.121583	0.19297	0.382205	0.241328	0.137998	0.13845
100.188	19.8125	0.0941666	0.119745	0.181493	0.113089	0.197264	0.396098	0.220912	0.131778	0.131326
100.188	19.8542	0.0886104	0.12561	0.183838	0.131313	0.204198	0.390173	0.230648	0.130197	0.111423
100.188	19.8958	0.0840384	0.104112	0.203672	0.121891	0.172004	0.350782	0.185326	0.121955	0.0965688
100.188	19.9375	0.0792256	0.0989569	0.199615	0.121673	0.158695	0.344072	0.193294	0.116134	0.0943802
100.188	19.9792	0.072171	0.105511	0.195405	0.114571	0.153021	0.320721	0.198842	0.116159	0.0903596
100.188	20.0208	0.0692919	0.107721	0.174904	0.106404	0.146874	0.301611	0.187298	0.116693	0.0863481
100.188	20.0625	0.066827	0.101466	0.164366	0.100763	0.152972	0.278348	0.166754	0.0966852	0.0776762
100.188	20.1042	0.0669654	0.094261	0.153912	0.100332	0.132124	0.239416	0.141361	0.0803977	0.0661178
100.188	20.1458	0.060297	0.0842233	0.138574	0.0893886	0.10426	0.191808	0.108836	0.0613374	0.0481815
100.188	20.1875	0.0526388	0.0800144	0.12698	0.0831411	0.0881944	0.145221	0.086639	0.0459705	0.0381226
100.188	20.2292	0.0451915	0.0715166	0.107005	0.0748777	0.0732608	0.112956	0.0605429	0.0283724	0.027778
100.188	20.2708	0.0433116	0.0604545	0.0985982	0.0659084	0.0620351	0.0804587	0.0404834	0.0213911	0.0187106
100.188	20.3125	0.0401845	0.0567408	0.0893716	0.0579828	0.0563723	0.0620819	0.0280417	0.0157863	0.015297
100.188	20.3542	0.0399109	0.0494187	0.0753773	0.0513612	0.0476548	0.0503306	0.0236599	0.0132936	0.0126726
100.188	20.3958	0.0397628	0.0486452	0.0669398	0.0452653	0.0405192	0.0409579	0.0185521	0.0124988	0.0110925
100.188	20.4375	0.0433528	0.0512663	0.0574544	0.0402515	0.0342725	0.0327049	0.0160468	0.0117941	0.0116007
100.188	20.4792	0.0402136	0.0482909	0.0482582	0.0332941	0.0285406	0.0254077	0.0137954	0.0099457	0.00959943
100.188	20.5208	0.0403774	0.0423378	0.0411136	0.0313899	0.0249239	0.0219601	0.0119705	0.00987185	0.00878462
100.188	20.5625	0.0339071	0.0310614	0.034043	0.0244048	0.0178891	0.0189392	0.0104004	0.00766044	0.00737462
100.188	20.6042	0.0257822	0.0268663	0.0284044	0.0175898	0.0166033	0.0162767	0.00862209	0.00678724	0.00659192
100.188	6.72917	0.0132064	0.00713336	0.00615875	0.00750009	0.00442674	0.00364196	0.00552057	0.00459931	0.00359729
100.188	6.77083	0.0128278	0.00696441	0.00597135	0.00723586	0.00440321	0.00338622	0.00546267	0.00490377	0.00347458
100.188	6.8125	0.0121078	0.00649664	0.00593152	0.00705855	0.00424679	0.00350325	0.00573732	0.00441619	0.00338264
100.188	6.85417	0.0119845	0.00648425	0.00574622	0.00712174	0.00429957	0.00319456	0.00523415	0.00427169	0.00327442
100.188	6.89583	0.0113608	0.00685222	0.00634552	0.00696629	0.00448391	0.00308219	0.00523002	0.00424055	0.00310369
100.188	6.9375	0.011881	0.00725672	0.00631934	0.0071278	0.00428065	0.00317442	0.00519751	0.00358995	0.00267459
100.188	6.97917	0.012392	0.0068488	0.00641827	0.00774464	0.00397298	0.0034755	0.00490349	0.00385274	0.00256744
100.188	7.02083	0.012264	0.00651566	0.00612072	0.00718225	0.0036843	0.00343113	0.00492485	0.00351192	0.002347
100.188	7.0625	0.0225659	0.0123517	0.0110715	0.0128294	0.00693829	0.00615276	0.00854567	0.00634464	0.0041959
100.188	7.10417	0.0242474	0.0131507	0.0119337	0.0147711	0.00775311	0.00676745	0.00917299	0.00632622	0.00389245
100.188	7.14583	0.0257452	0.0152609	0.0134871	0.0173639	0.00873341	0.00638805	0.00870077	0.00620615	0.00397364
100.188	7.1875	0.0269888	0.0168579	0.0136316	0.0193218	0.00854756	0.00571991	0.0076857	0.00546289	0.00379155
100.188	7.22917	0.0360289	0.0228403	0.0179897	0.0251264	0.0106368	0.00682505	0.0083528	0.00626781	0.00475958
100.188	7.27083	0.0372391	0.02536	0.0218346	0.0282584	0.0116793	0.00727025	0.0088242	0.0066221	0.0051647
100.188	7.3125	0.0418317	0.0295236	0.0265365	0.0308677	0.0119008	0.00735273	0.00858741	0.00661831	0.00521398
100.188	7.35417	0.0423227	0.0289022	0.0264383	0.0298163	0.0109889	0.00651424	0.00823297	0.00715316	0.00527273
100.188	7.39583	0.0403637	0.0277971	0.0244721	0.0314356	0.0107789	0.00656254	0.00882123	0.0073546	0.00506479
100.188	7.4375	0.032814	0.0222194	0.021161	0.0245988	0.00858263	0.00559855	0.00734028	0.00568216	0.00448194
100.188	7.47917	0.0344241	0.0232946	0.0225424	0.0246102	0.00896306	0.00587949	0.00736688	0.00576784	0.00503496
100.188	7.52083	0.0340641	0.0225049	0.0203426	0.0230098	0.0102262	0.00633513	0.00697886	0.00652401	0.00536905
100.188	7.5625	0.0381046	0.0246095	0.0212861	0.0243493	0.0103359	0.00682384	0.00744438	0.00733439	0.00589295
100.188	7.72917	0.0380875	0.0243453	0.0247023	0.026014	0.0106333	0.00708841	0.0099826	0.00839216	0.00722264
100.188	7.77083	0.0356323	0.0276522	0.0261589	0.0265795	0.0115808	0.00751741	0.00938835	0.00846473	0.00734587
100.188	7.8125	0.0367752	0.0255527	0.029582	0.0230857	0.0121026	0.00724672	0.00884133	0.00779958	0.00659832
100.188	7.85417	0.0341965	0.0255113	0.0298567	0.0243737	0.0117287	0.00804084	0.00816645	0.00769929	0.00656795
100.188	7.89583	0.0324455	0.0278959	0.0282801	0.0247267	0.0116785	0.00796442	0.00868957	0.00777858	0.00738355
100.188	7.9375	0.0323901	0.0267573	0.027062	0.0242999	0.0111596	0.00712606	0.00810354	0.00773443	0.00739147
100.188	7.97917	0.039677	0.0312791	0.0315567	0.0315456	0.0133661	0.00943849	0.00988659	0.00982363	0.00878637
100.188	8.02083	0.0358337	0.0291985	0.0318147	0.0289697	0.0115346	0.00901918	0.00857001	0.0085039	0.00798725
100.188	8.0625	0.0367863	0.0311905	0.0331532	0.0291475	0.013111	0.0108206	0.00900038	0.00883024	0.00866993
100.188	8.10417	0.0347103	0.0284952	0.031585	0.028076	0.0134267	0.00924532	0.00964978	0.00879398	0.00789559
100.188	8.14583	0.0276061	0.0289366	0.0289125	0.0254191	0.0125165	0.0085866	0.00787115	0.00869998	0.0072244
100.188	8.1875	0.0241911	0.0270067	0.0263937	0.0226938	0.0119363	0.00826706	0.00698281	0.0075221	0.0073293
100.188	8.22917	0.0179266	0.0201297	0.0226195	0.0190077	0.00971558	0.00660609	0.00616263	0.00514191	0.00606098
100.188	8.27083	0.0215669	0.0215588	0.0244982	0.0192837	0.0093664	0.00722562	0.00675911	0.00603337	0.00652078
100.188	8.3125	0.0258146	0.0251575	0.0318892	0.0249751	0.0125647	0.00937706	0.00916558	0.00721885	0.00704798
100.188	8.35417	0.0203594	0.0198394	0.0240731	0.0178382	0.00841727	0.00690906	0.00636811	0.00521357	0.00548873
100.188	8.39583	0.0237723	0.023016	0.0294728	0.0220797	0.0109844	0.00860026	0.00700533	0.00561855	0.00716971
100.188	8.4375	0.02663	0.0263686	0.0287023	0.023875	0.013602	0.00948538	0.00777801	0.00613094	0.00726492
100.188	8.47917	0.026635	0.0270573	0.031272	0.0248447	0.0148283	0.0102656	0.00826986	0.00705481	0.0078965
100.229	13.4792	0.116802	0.0596498	0.0448322	0.114603	0.122407	0.0208399	0.00448643	0.0050861	0.00542356
100.229	13.5208	0.104086	0.0475428	0.0401696	0.103781	0.102599	0.015155	0.00337662	0.0039881	0.00459627
100.229	13.5625	0.129444	0.0519193	0.0489658	0.125601	0.123013	0.0191567	0.00410158	0.00516558	0.00520487
100.229	13.6042	0.134636	0.0557084	0.0493426	0.137372	0.128896	0.0181253	0.00414638	0.00556583	0.00552672
100.229	13.6458	0.14296	0.0574546	0.0513798	0.140292	0.127278	0.0165502	0.00418086	0.00574508	0.00556825
100.229	13.6875	0.127665	0.0518817	0.0439165	0.1283	0.107221	0.0130309	0.00353457	0.00520239	0.00491674
100.229	13.7292	0.0976001	0.0365371	0.0318904	0.0951257	0.0704365	0.00756936	0.00236353	0.00365521	0.00338957
100.229	13.7708	0.0975158	0.0356218	0.0299913	0.0880591	0.0640912	0.00693967	0.00233352	0.00349437	0.00291815
100.229	13.8125	0.113706	0.0419749	0.0373492	0.107752	0.0767521	0.00815293	0.00286446	0.00396956	0.00337688
100.229	13.8542	0.153602	0.0567732	0.0482338	0.140152	0.101282	0.0107063	0.00381295	0.00545472	0.00411512
100.229	13.8958	0.153165	0.0625539	0.0617081	0.149323	0.108765	0.0131092	0.00513712	0.00626806	0.0044069
100.229	13.9375	0.135574	0.0640475	0.0626895	0.153259	0.115091	0.0170473	0.00607282	0.00684988	0.00438288
100.229	13.9792	0.128839	0.0626721	0.0673183	0.170225	0.139974	0.0227723	0.0083643	0.0078446	0.00516602
100.229	14.0208	0.0990675	0.05213	0.0547837	0.139068	0.103343	0.0177999	0.00645809	0.00526546	0.00341324
100.229	14.0625	0.1014	0.0567753	0.0555369	0.134502	0.0932165	0.0174458	0.0060432	0.00506158	0.00286263
100.229	14.1042	0.0946927	0.0552617	0.0598512	0.131849	0.0844966	0.0193461	0.00715029	0.00462718	0.00257164
100.229	14.1458	0.0922321	0.0588039	0.0564888	0.119657	0.0822531	0.0215228	0.00754788	0.00425704	0.00236965
100.229	14.1875	0.0898027	0.054278	0.0566584	0.114047	0.0875003	0.0238472	0.00814098	0.00431248	0.00235491
100.229	14.2292	0.0903995	0.0560634	0.0527281	0.103734	0.0891368	0.0232489	0.0104219	0.00459885	0.00245645
100.229	14.2708	0.0923434	0.0564893	0.0532539	0.114098	0.0760168	0.0264731	0.0107986	0.0048418	0.00224163
100.229	14.3125	0.0886495	0.0597489	0.0560289	0.0959566	0.0744839	0.028518	0.0124855	0.00508585	0.00227088
100.229	14.3542	0.094504	0.0608435	0.0573535	0.0897331	0.0733634	0.0341968	0.0146293	0.00509823	0.00212904
100.229	14.3958	0.0919421	0.061095	0.0546702	0.0850704	0.0729786	0.0377939	0.0181682	0.00538866	0.00209221
100.229	14.4375	0.089692	0.0651743	0.0551718	0.0799916	0.079176	0.0401643	0.0217841	0.00547082	0.00203475
100.229	14.4792	0.0841979	0.0638145	0.0568202	0.086712	0.0739684	0.0430893	0.0220344	0.00561316	0.00204096
100.229	14.5208	0.110933	0.0794589	0.0717088	0.112516	0.0902171	0.0566294	0.0344753	0.00773419	0.00256981
100.229	14.5625	0.104585	0.0791949	0.0708045	0.111361	0.0893255	0.0605477	0.0387364	0.00781314	0.00230652
100.229	14.6042	0.102726	0.0802687	0.0703266	0.115005	0.0966643	0.0692344	0.0508504	0.00896428	0.00271502
100.229	14.6458	0.111027	0.0829197	0.0736553	0.122773	0.110632	0.0775493	0.05556	0.0103123	0.00270325
100.229	14.6875	0.105852	0.0842501	0.0728557	0.119673	0.107292	0.0689502	0.0429101	0.00895135	0.00266947
100.229	14.7292	0.104881	0.0834372	0.0743362	0.124332	0.112265	0.0658787	0.0328171	0.00767197	0.00257132
100.229	14.7708	0.106554	0.0860702	0.0759616	0.121097	0.113926	0.0585957	0.0274821	0.00679013	0.00253526
100.229	14.8125	0.105344	0.0800226	0.0674842	0.106926	0.104223	0.0476733	0.0198486	0.00510181	0.0022201
100.229	14.8542	0.108309	0.0804864	0.0653406	0.108816	0.108196	0.0469496	0.0177753	0.00467246	0.0024416
100.229	14.8958	0.115019	0.086277	0.076914	0.123967	0.112376	0.0480926	0.0172716	0.00453508	0.00229794
100.229	14.9375	0.0928914	0.0642606	0.0563836	0.113194	0.0918462	0.0361632	0.0119715	0.00310491	0.00168436
100.229	14.9792	0.113254	0.0746867	0.066862	0.141217	0.125449	0.042327	0.0150384	0.00369285	0.00197657
100.229	15.0208	0.106958	0.0770074	0.0717372	0.155224	0.124478	0.0449735	0.0158909	0.00417183	0.00220158
100.229	15.0625	0.104535	0.0784834	0.0779704	0.160676	0.141737	0.049113	0.0178003	0.00464572	0.00220423
100.229	15.1042	0.0938514	0.0751575	0.0785164	0.174957	0.142107	0.0475739	0.0202674	0.00571226	0.00243003
100.229	15.1458	0.0870246	0.0566263	0.0642064	0.171704	0.131534	0.0412079	0.0219098	0.00593229	0.00285977
100.229	15.1875	0.103848	0.0793199	0.0883736	0.222926	0.200449	0.0689371	0.0327078	0.0110946	0.0054217
100.229	15.2292	0.092774	0.0697833	0.0766844	0.233918	0.212199	0.0759807	0.0438324	0.0169392	0.00873269
100.229	15.2708	0.0777626	0.0559881	0.0675797	0.223388	0.211318	0.0795722	0.0598564	0.0267916	0.0135113
100.229	15.3125	0.0872578	0.0578252	0.0725346	0.260393	0.241674	0.0957029	0.080717	0.0437145	0.0248559
100.229	15.3542	0.089929	0.0713375	0.0890292	0.291737	0.273267	0.119433	0.112819	0.0693115	0.0457234
100.229	15.3958	0.0938496	0.0834271	0.0943685	0.321979	0.320653	0.136217	0.158637	0.109621	0.0823858
100.229	15.4375	0.107306	0.0868617	0.102243	0.337974	0.324003	0.161776	0.182762	0.153172	0.122938
100.229	15.4792	0.0962316	0.0763841	0.0899851	0.309194	0.283644	0.140287	0.171527	0.172956	0.121475
100.229	15.5208	0.144715	0.103443	0.113874	0.375309	0.372229	0.198075	0.277346	0.268604	0.191954
100.229	15.5625	0.189564	0.122131	0.132357	0.403714	0.378939	0.221994	0.267846	0.253082	0.206871
100.229	15.6042	0.23414	0.143245	0.150218	0.414187	0.37535	0.227004	0.277833	0.239776	0.210606
100.229	15.6458	0.27368	0.175278	0.15325	0.383899	0.357135	0.224574	0.281466	0.233073	0.203259
100.229	15.6875	0.344968	0.201483	0.159965	0.381624	0.368143	0.231945	0.291258	0.224516	0.172469
100.229	15.7292	0.398621	0.256582	0.178536	0.351531	0.336761	0.230324	0.235404	0.174134	0.140224
100.229	15.7708	0.485055	0.306406	0.204434	0.347882	0.336118	0.239977	0.217829	0.165492	0.134959
100.229	15.8125	0.561186	0.35337	0.233548	0.345957	0.31295	0.237768	0.210811	0.141054	0.103647
100.229	15.8542	0.669485	0.403119	0.263356	0.33638	0.299834	0.22119	0.186558	0.120999	0.0934135
100.229	15.8958	0.74661	0.483313	0.288688	0.324443	0.270769	0.252638	0.180358	0.111682	0.0962535
100.229	15.9375	0.780532	0.513162	0.301891	0.304434	0.260402	0.238875	0.173938	0.107881	0.0781747
100.229	15.9792	0.841288	0.610183	0.366722	0.325165	0.290076	0.305867	0.214905	0.119008	0.0900899
100.229	16.0208	0.865517	0.619414	0.381711	0.283855	0.270733	0.338361	0.193569	0.106184	0.0899962
100.229	16.0625	0.886017	0.657551	0.362607	0.272074	0.247459	0.331593	0.172943	0.107842	0.0846546
100.229	16.1042	0.837377	0.581989	0.330955	0.206411	0.216882	0.315968	0.159224	0.0989803	0.0809131
100.229	16.1458	0.711192	0.432996	0.258014	0.158139	0.161896	0.267535	0.136814	0.0863957	0.0697821
100.229	16.1875	0.44146	0.223791	0.149687	0.101954	0.114026	0.234751	0.115227	0.0740838	0.0677236
100.229	16.2292	0.197299	0.0947584	0.0820407	0.0654119	0.0815105	0.190745	0.0964196	0.0596108	0.0634895
100.229	16.2708	0.0701966	0.037441	0.044086	0.0399418	0.0592147	0.163441	0.0827363	0.0524027	0.0549235
100.229	16.3125	0.0817915	0.0445491	0.0521345	0.0403077	0.0577207	0.166976	0.0850169	0.0522275	0.0526972
100.229	16.3542	0.138798	0.0738245	0.0705102	0.046349	0.0619157	0.18922	0.0856788	0.0523657	0.0571792
100.229	16.3958	0.231877	0.121168	0.100386	0.0567689	0.0678496	0.19535	0.0811115	0.0558172	0.0581795
100.229	16.4375	0.358128	0.189984	0.142255	0.069521	0.0765357	0.205687	0.0873865	0.0555503	0.0560421
100.229	16.4792	0.399989	0.215513	0.142318	0.062732	0.0590783	0.16343	0.0694725	0.0413128	0.0467802
100.229	16.5208	0.470919	0.270033	0.203327	0.0788855	0.078054	0.204546	0.0921155	0.0601954	0.0685015
100.229	16.5625	0.312203	0.188228	0.162184	0.0595793	0.066168	0.173228	0.0761476	0.0425733	0.0503646
100.229	16.6042	0.214231	0.15009	0.148476	0.0658561	0.0691801	0.171434	0.0769241	0.0387163	0.0409382
100.229	16.6458	0.148649	0.116775	0.138825	0.0673357	0.0780634	0.175035	0.0760155	0.0395041	0.0341689
100.229	16.6875	0.125728	0.111956	0.146797	0.0882668	0.105746	0.224859	0.0932581	0.0478371	0.0461645
100.229	16.7292	0.0813368	0.082204	0.133767	0.0908267	0.11263	0.222038	0.0923894	0.0441632	0.039291
100.229	16.7708	0.0479615	0.0567924	0.122462	0.086063	0.101573	0.197888	0.081981	0.035486	0.029751
100.229	16.8125	0.034191	0.0476524	0.115327	0.0867283	0.102002	0.190046	0.0791168	0.0303895	0.0247939
100.229	16.8542	0.0476077	0.0691249	0.138033	0.116193	0.119199	0.198255	0.0766948	0.0265168	0.0205088
100.229	16.8958	0.0853581	0.113566	0.220691	0.142533	0.141641	0.246073	0.0813558	0.0268134	0.0185738
100.229	16.9375	0.178854	0.217114	0.340941	0.191771	0.191903	0.306127	0.10332	0.026356	0.0185778
100.229	16.9792	0.310432	0.332461	0.435381	0.278157	0.237764	0.329981	0.105642	0.0251397	0.0153799
100.229	17.0208	0.44308	0.441216	0.52279	0.342286	0.30058	0.335048	0.113024	0.0233838	0.0161648
100.229	17.0625	0.364777	0.40671	0.543916	0.345535	0.289114	0.33373	0.111034	0.0213546	0.0137722
100.229	17.1042	0.319983	0.383567	0.569764	0.356649	0.287113	0.342261	0.0983233	0.020846	0.0116301
100.229	17.1458	0.283926	0.357863	0.548181	0.318985	0.292074	0.33998	0.10234	0.0189775	0.0111846
100.229	17.1875	0.229049	0.302358	0.485138	0.293641	0.248913	0.307457	0.0840026	0.0157009	0.00777058
100.229	17.2292	0.0980463	0.164931	0.356182	0.225194	0.214247	0.265274	0.0680405	0.0148966	0.00729357
100.229	17.2708	0.0475227	0.0962781	0.261571	0.187855	0.186912	0.243727	0.0604767	0.0119928	0.00650012
100.229	17.3125	0.0241844	0.0501047	0.171559	0.133492	0.143521	0.197827	0.0486082	0.00840904	0.00421463
100.229	17.3542	0.0157772	0.0376191	0.138724	0.129401	0.139301	0.206673	0.0478418	0.00807742	0.00424172
100.229	17.3958	0.0169343	0.0366945	0.129499	0.101968	0.134104	0.177599	0.0435784	0.00732516	0.0035335
100.229	17.4375	0.0192049	0.0391391	0.130783	0.103336	0.134349	0.206888	0.0490167	0.00841922	0.00354634
100.229	17.4792	0.019324	0.0351865	0.116495	0.102695	0.121435	0.196132	0.0504833	0.00842006	0.00357652
100.229	17.5208	0.0193167	0.0419457	0.120252	0.108327	0.130505	0.195845	0.0610015	0.00987738	0.00400136
100.229	17.5625	0.0197109	0.0406158	0.122824	0.0995169	0.138416	0.226264	0.0679977	0.0120793	0.0047319
100.229	17.6042	0.0242839	0.0462581	0.139166	0.109449	0.143519	0.251428	0.072494	0.0139265	0.00588474
100.229	17.6458	0.0285676	0.0493148	0.147743	0.109496	0.129454	0.247836	0.073123	0.0137032	0.00641975
100.229	17.6875	0.0330222	0.0586725	0.16155	0.125644	0.137838	0.244431	0.0771434	0.014243	0.00773308
100.229	17.7292	0.0281031	0.0548481	0.126676	0.10288	0.117405	0.21406	0.0588221	0.011305	0.006191
100.229	17.7708	0.0276845	0.0496627	0.111049	0.081997	0.101908	0.18523	0.0489202	0.0108749	0.0059488
100.229	17.8125	0.0314587	0.0580275	0.126022	0.0874329	0.116651	0.191197	0.0555174	0.014771	0.00754742
100.229	17.8542	0.040423	0.0669497	0.138748	0.0875606	0.123226	0.208364	0.071115	0.0202706	0.00992275
100.229	17.8958	0.0462848	0.0793131	0.156858	0.0955078	0.129603	0.198569	0.0769967	0.0237312	0.0128552
100.229	17.9375	0.0501155	0.0755819	0.169903	0.100858	0.144007	0.20921	0.0846739	0.0276487	0.0176009
100.229	17.9792	0.0507635	0.0806584	0.163657	0.10188	0.144585	0.207296	0.0887058	0.0309658	0.0212983
100.229	18.0208	0.0520525	0.0810507	0.168612	0.113269	0.147091	0.218911	0.0936015	0.0367135	0.0254976
100.229	18.0625	0.0569489	0.0913363	0.19779	0.128226	0.149026	0.231917	0.109876	0.0480687	0.0305179
100.229	18.1042	0.0524888	0.0899178	0.179393	0.121212	0.149137	0.226529	0.118985	0.0512832	0.034078
100.229	18.1458	0.080243	0.111335	0.235903	0.172998	0.188073	0.300793	0.161312	0.0759183	0.0594128
100.229	18.1875	0.0734859	0.105778	0.205399	0.156098	0.175931	0.275544	0.150501	0.0800263	0.0623373
100.229	18.2292	0.0919651	0.147619	0.279125	0.18931	0.198437	0.329635	0.196487	0.115256	0.0978353
100.229	18.2708	0.0922903	0.165197	0.305286	0.21344	0.203997	0.345451	0.19658	0.139789	0.115246
100.229	18.3125	0.100773	0.168888	0.31634	0.204361	0.224071	0.342491	0.204951	0.152363	0.136271
100.229	18.3542	0.096698	0.150751	0.300818	0.178991	0.205811	0.306679	0.183892	0.14392	0.144762
100.229	18.3958	0.0742267	0.114637	0.214631	0.132682	0.151037	0.242292	0.128884	0.112732	0.114938
100.229	18.4375	0.0654055	0.10347	0.212454	0.140753	0.158996	0.250477	0.125208	0.114451	0.123704
100.229	18.4792	0.0737516	0.103701	0.203995	0.136484	0.169279	0.264227	0.121323	0.115584	0.140979
100.229	18.5208	0.0819126	0.099141	0.20249	0.141795	0.160852	0.289729	0.126881	0.119036	0.152988
100.229	18.5625	0.0813554	0.104785	0.205577	0.140395	0.16632	0.300898	0.128796	0.113353	0.138631
100.229	18.6042	0.0791331	0.104996	0.21644	0.13281	0.164963	0.277722	0.120745	0.111081	0.132297
100.229	18.6458	0.0762579	0.102675	0.204543	0.134633	0.162744	0.299155	0.123066	0.114345	0.141232
100.229	18.6875	0.0699467	0.110147	0.200526	0.126165	0.167286	0.29942	0.129353	0.10417	0.150137
100.229	18.7292	0.0832922	0.104053	0.2188	0.128821	0.16814	0.318642	0.132373	0.125942	0.164558
100.229	18.7708	0.0811411	0.107014	0.204211	0.123771	0.155279	0.31523	0.131582	0.119665	0.167512
100.229	18.8125	0.0848743	0.122447	0.221262	0.112518	0.140028	0.309548	0.135652	0.112378	0.145813
100.229	18.8542	0.0868448	0.116803	0.221924	0.110691	0.12934	0.306476	0.143175	0.10711	0.145272
100.229	18.8958	0.0826433	0.112751	0.19749	0.110147	0.135051	0.287848	0.127077	0.104323	0.135184
100.229	18.9375	0.0805461	0.110665	0.191979	0.0920501	0.131898	0.268676	0.131901	0.103719	0.115566
100.229	18.9792	0.0764877	0.11292	0.182071	0.0837907	0.119307	0.263827	0.122954	0.109981	0.114358
100.229	19.0208	0.0783265	0.102412	0.165411	0.0747225	0.100503	0.248618	0.109217	0.10001	0.116132
100.229	19.0625	0.0776759	0.1037	0.171048	0.0824457	0.115235	0.274017	0.124073	0.112495	0.114835
100.229	19.1042	0.080669	0.103591	0.178708	0.0887752	0.113426	0.282021	0.153813	0.113259	0.132213
100.229	19.1458	0.0786498	0.108499	0.192839	0.0905002	0.12196	0.28583	0.164758	0.122259	0.125768
100.229	19.1875	0.0771227	0.111978	0.205419	0.0918746	0.125831	0.315504	0.181595	0.129637	0.147252
100.229	19.2292	0.0734947	0.107916	0.205738	0.0923383	0.1229	0.311444	0.188194	0.132038	0.140712
100.229	19.2708	0.0666101	0.100688	0.188064	0.0856297	0.111167	0.281883	0.158944	0.117607	0.134678
100.229	19.3125	0.0729922	0.101833	0.196744	0.0879276	0.113886	0.283824	0.185006	0.131077	0.135516
100.229	19.3542	0.080946	0.108562	0.203205	0.0861393	0.110159	0.289207	0.198621	0.147494	0.151105
100.229	19.3958	0.0805177	0.104415	0.211137	0.0913063	0.110187	0.298177	0.194524	0.147209	0.162045
100.229	19.4375	0.0719688	0.103887	0.201701	0.0933325	0.110427	0.305444	0.208164	0.158168	0.151724
100.229	19.4792	0.0626943	0.100952	0.187542	0.0897795	0.107925	0.277503	0.199124	0.150328	0.134678
100.229	19.5208	0.0702089	0.111368	0.211035	0.102127	0.125747	0.301681	0.212121	0.162188	0.152683
100.229	19.5625	0.081566	0.110076	0.225461	0.105594	0.139223	0.339693	0.215741	0.162989	0.163894
100.229	19.6042	0.092884	0.105991	0.237317	0.115192	0.158842	0.327053	0.225118	0.158847	0.16418
100.229	19.6458	0.0883231	0.111481	0.22548	0.106055	0.157351	0.328792	0.219717	0.160171	0.161723
100.229	19.6875	0.0793741	0.107535	0.196673	0.0902235	0.136006	0.315382	0.19939	0.133492	0.116444
100.229	19.7292	0.0897045	0.122819	0.187819	0.108054	0.149365	0.324196	0.216424	0.118596	0.126774
100.229	19.7708	0.0936982	0.120736	0.190008	0.115647	0.173034	0.337996	0.203939	0.114409	0.120279
100.229	19.8125	0.0856828	0.117574	0.186735	0.114983	0.190837	0.354978	0.20426	0.123498	0.120263
100.229	19.8542	0.0790877	0.118997	0.183103	0.121539	0.187369	0.368934	0.187041	0.117169	0.0982398
100.229	19.8958	0.0777957	0.102299	0.185183	0.117914	0.163853	0.297949	0.153994	0.107002	0.0918985
100.229	19.9375	0.0713	0.0960585	0.164518	0.111145	0.147294	0.276102	0.146891	0.0941663	0.0700432
100.229	19.9792	0.0653999	0.103299	0.171306	0.108356	0.134796	0.270217	0.156844	0.0918716	0.0741942
100.229	20.0208	0.0663133	0.100529	0.161861	0.113123	0.128526	0.25478	0.149302	0.0804012	0.068562
100.229	20.0625	0.0604051	0.0958292	0.149344	0.0943647	0.114124	0.224999	0.129497	0.0665765	0.0564277
100.229	20.1042	0.0568209	0.0934715	0.151151	0.0835188	0.105185	0.18561	0.106368	0.0579987	0.0506437
100.229	20.1458	0.0571903	0.0833606	0.135626	0.0750494	0.0867336	0.148256	0.0862593	0.0438105	0.0410921
100.229	20.1875	0.0503687	0.0731139	0.118935	0.0675135	0.0717116	0.115772	0.0627558	0.0324047	0.0303334
100.229	20.2292	0.0474239	0.06362	0.107649	0.0647199	0.0604347	0.0895831	0.0448689	0.0247596	0.0210656
100.229	20.2708	0.0419622	0.0548627	0.0875612	0.0617099	0.0506333	0.0631209	0.0305936	0.0164551	0.0161867
100.229	20.3125	0.0378931	0.0507819	0.0747933	0.0523202	0.0443965	0.04807	0.0228297	0.0134889	0.0127504
100.229	20.3542	0.0393178	0.0448069	0.0576486	0.0430414	0.0409872	0.0357842	0.0186804	0.0110535	0.0103477
100.229	20.3958	0.0372252	0.0447142	0.0545954	0.0427993	0.0355919	0.0304196	0.015888	0.00972435	0.00871516
100.229	20.4375	0.0363989	0.0405504	0.0523835	0.0369318	0.0290671	0.0262326	0.0116565	0.00808769	0.00756827
100.229	20.4792	0.0327974	0.0397296	0.0490356	0.0273615	0.0235645	0.0191087	0.00922372	0.0069147	0.00606128
100.229	20.5208	0.0313756	0.0350547	0.0380408	0.0239023	0.0196955	0.0150611	0.00828169	0.00585637	0.00538176
100.229	20.5625	0.0288149	0.0317228	0.0321014	0.0224954	0.0162998	0.0145009	0.00799039	0.00573222	0.00541169
100.229	20.6042	0.0233053	0.0256156	0.0248222	0.0181048	0.0135443	0.0121995	0.0078249	0.00520895	0.00494508
100.229	20.6458	0.0217902	0.025777	0.0223747	0.0136174	0.0107504	0.0110416	0.00626968	0.00534476	0.00527481
100.229	20.6875	0.0208676	0.021443	0.0201081	0.0117711	0.00949082	0.00962706	0.0056047	0.00524895	0.00457301
100.229	6.72917	0.0130651	0.00686173	0.00595025	0.00812743	0.00499887	0.00454476	0.00675554	0.00622456	0.00483733
100.229	6.77083	0.0114408	0.00593682	0.00509338	0.00692976	0.00418801	0.00353719	0.00652903	0.00497296	0.00379481
100.229	6.8125	0.0130361	0.00756305	0.00584587	0.00865919	0.00485417	0.00414135	0.00769523	0.00652747	0.00440636
100.229	6.85417	0.014282	0.00781433	0.00635766	0.00920874	0.00532343	0.00449436	0.00773011	0.00651795	0.00425402
100.229	6.89583	0.013207	0.00724724	0.00639085	0.00788528	0.00505035	0.00399401	0.00643819	0.00525823	0.00403365
100.229	6.9375	0.011506	0.0062149	0.00560743	0.00742407	0.00481587	0.00327282	0.00549628	0.00380163	0.00264736
100.229	6.97917	0.0111925	0.00619212	0.0056534	0.00733237	0.00442857	0.00340418	0.00510649	0.00368994	0.00260625
100.229	7.02083	0.016111	0.00899502	0.00731987	0.0102371	0.00584075	0.00505584	0.00701077	0.00525784	0.0033646
100.229	7.0625	0.0272428	0.0154836	0.0141083	0.0168401	0.0102219	0.00861428	0.0120873	0.00848632	0.00592876
100.229	7.10417	0.0309212	0.0170921	0.0144901	0.0182877	0.0106554	0.0093853	0.0124678	0.00862248	0.00533127
100.229	7.14583	0.0307582	0.018947	0.0173404	0.0193229	0.0115454	0.00891401	0.0113951	0.00775354	0.00533474
100.229	7.1875	0.0349855	0.0211882	0.0174061	0.0235422	0.0128305	0.00828632	0.0106178	0.0079605	0.00525595
100.229	7.22917	0.0377847	0.0240893	0.0189501	0.0228198	0.0124567	0.00849554	0.0100247	0.00727925	0.00571937
100.229	7.27083	0.0358156	0.0254287	0.0196487	0.0248309	0.0122584	0.007597	0.00945505	0.00746183	0.00522212
100.229	7.3125	0.0317057	0.020741	0.0183209	0.0217329	0.00900997	0.00574086	0.00702235	0.00577527	0.00414169
100.229	7.35417	0.0401427	0.0273454	0.0233073	0.0301267	0.0112135	0.00719985	0.00890509	0.00720429	0.00540037
100.229	7.39583	0.0391661	0.0258597	0.0242688	0.0292574	0.0124141	0.00730855	0.010417	0.00771079	0.0055627
100.229	7.4375	0.0314718	0.0207543	0.0202113	0.0227601	0.00824244	0.00586641	0.00869021	0.0063049	0.00464515
100.229	7.47917	0.0324195	0.0211643	0.0200596	0.0230313	0.00941621	0.00617107	0.00848641	0.00671482	0.00511655
100.229	7.77083	0.0337761	0.0240797	0.023629	0.0234484	0.0109487	0.00842994	0.00976131	0.0089525	0.00754702
100.229	7.8125	0.0321186	0.0223491	0.0248358	0.024206	0.0109598	0.00752534	0.00887091	0.00823603	0.00704259
100.229	7.85417	0.0309554	0.0243662	0.0266139	0.0242902	0.0111781	0.00884962	0.00868473	0.00799733	0.00756644
100.229	7.89583	0.0359437	0.0315869	0.035197	0.0293101	0.014112	0.0119599	0.011933	0.0102903	0.0100573
100.229	7.9375	0.036992	0.0323986	0.0326871	0.0279537	0.0136848	0.0103056	0.0114315	0.0106516	0.00968658
100.229	7.97917	0.0396422	0.033642	0.0312947	0.0295855	0.012638	0.00978468	0.0101977	0.0101025	0.00976183
100.229	8.02083	0.0397897	0.0342223	0.0321751	0.0283015	0.0124786	0.00983087	0.0103197	0.00972005	0.0091093
100.229	8.0625	0.0330529	0.0271639	0.0237165	0.021751	0.00976068	0.00778224	0.00751513	0.00696392	0.00666775
100.229	8.10417	0.0326139	0.0322746	0.0325902	0.0267086	0.0120991	0.0103489	0.0103025	0.00839088	0.00751922
100.229	8.14583	0.0314445	0.029437	0.0316832	0.0258809	0.0144947	0.0106159	0.00972672	0.00892985	0.00784871
100.229	8.1875	0.0231648	0.0214759	0.0222891	0.0187579	0.0102262	0.00807571	0.00652476	0.00611412	0.00601384
100.229	8.22917	0.0215629	0.0211059	0.0214164	0.018923	0.0102076	0.00717062	0.00622592	0.00531472	0.00585443
100.229	8.27083	0.0263654	0.023986	0.0271138	0.0258469	0.0124471	0.0092238	0.00866707	0.00728199	0.00884198
100.229	8.3125	0.0186847	0.0197712	0.0227871	0.019495	0.0100008	0.00716116	0.00715161	0.00570452	0.00668938
100.229	8.35417	0.0170169	0.0177674	0.023276	0.0158719	0.00997481	0.00722956	0.00666808	0.00499589	0.00684378
100.229	8.39583	0.0214549	0.020835	0.0244147	0.0175501	0.0111802	0.00777856	0.00660079	0.00590379	0.00729924
100.271	13.5625	0.0956366	0.0359207	0.030131	0.10164	0.100345	0.0144475	0.00312038	0.00382357	0.00379385
100.271	13.6042	0.100715	0.03658	0.0300302	0.101541	0.101349	0.0134875	0.00297439	0.00374372	0.00361884
100.271	13.6458	0.0986306	0.0352499	0.0296075	0.0946524	0.0930687	0.0117374	0.00288156	0.00376548	0.00339826
100.271	13.6875	0.0868382	0.0317222	0.027033	0.0902331	0.07383	0.00949226	0.00265786	0.00372482	0.00323175
100.271	13.7292	0.0830683	0.0318656	0.0268955	0.0848271	0.0664298	0.00750328	0.00237556	0.00325829	0.00283722
100.271	13.7708	0.093456	0.0328854	0.0278566	0.0898788	0.0609104	0.00636007	0.00219647	0.00326878	0.00258979
100.271	13.8125	0.119693	0.0408388	0.0318823	0.103097	0.06789	0.00667818	0.00238115	0.00384462	0.00332972
100.271	13.8542	0.15214	0.0509327	0.0433207	0.131159	0.0993497	0.0100466	0.00366029	0.00575727	0.00365168
100.271	13.8958	0.149891	0.0556294	0.0495756	0.150617	0.118964	0.0132446	0.00490999	0.00620485	0.00408992
100.271	13.9375	0.150488	0.0615378	0.0605246	0.167921	0.1407	0.0193479	0.00792963	0.00801213	0.00428469
100.271	13.9792	0.153382	0.0632379	0.0656026	0.180408	0.152973	0.0258913	0.0108977	0.00955672	0.00468091
100.271	14.0208	0.115943	0.0500206	0.0536651	0.143217	0.113558	0.0204899	0.00781891	0.00621017	0.00329355
100.271	14.0625	0.107737	0.0539769	0.0545374	0.133694	0.103682	0.0201135	0.00720128	0.00554155	0.00292537
100.271	14.1042	0.10215	0.0503555	0.0556868	0.130069	0.0926738	0.0206346	0.0072111	0.0046817	0.00254408
100.271	14.1458	0.125242	0.0683627	0.0663584	0.144968	0.113287	0.0282103	0.00912957	0.00505892	0.00320132
100.271	14.1875	0.121943	0.0667095	0.0689264	0.141392	0.104497	0.0286427	0.00986518	0.00472041	0.0029238
100.271	14.2292	0.0876399	0.0533015	0.0535352	0.11229	0.0861834	0.0224907	0.00868246	0.00423078	0.00216224
100.271	14.2708	0.0891362	0.0552554	0.0560591	0.106376	0.0765426	0.0241651	0.00901327	0.00442999	0.00221364
100.271	14.3125	0.0925872	0.0539674	0.0511477	0.0978037	0.0715632	0.0260098	0.00955786	0.00461702	0.00189655
100.271	14.3542	0.0886854	0.059302	0.0540802	0.0882835	0.077252	0.0293397	0.0122654	0.00449729	0.00186666
100.271	14.3958	0.0856381	0.0632087	0.0525114	0.0834422	0.0696759	0.0338875	0.01412	0.00444198	0.00177336
100.271	14.4375	0.0866801	0.0625171	0.0511381	0.0820451	0.0677748	0.0361747	0.0159688	0.00467225	0.00174185
100.271	14.4792	0.105156	0.0761133	0.0675338	0.106963	0.0887964	0.0480177	0.0235877	0.00604073	0.00217853
100.271	14.5208	0.108147	0.0753417	0.0706314	0.108103	0.0923329	0.0572252	0.0292635	0.00726039	0.00236818
100.271	14.5625	0.107654	0.0730919	0.0730952	0.108979	0.0944259	0.0618148	0.0373891	0.00842047	0.00263193
100.271	14.6042	0.107264	0.0764641	0.0747667	0.111559	0.0985271	0.0706035	0.0469306	0.0104773	0.00269859
100.271	14.6458	0.0897159	0.0632253	0.0593639	0.0955481	0.0871792	0.062632	0.0410472	0.00889209	0.00230906
100.271	14.6875	0.107752	0.0813464	0.0754066	0.118172	0.106959	0.0673564	0.0404484	0.00936933	0.00289675
100.271	14.7292	0.105564	0.083623	0.0745343	0.119423	0.109212	0.0604797	0.0311632	0.00783959	0.00279567
100.271	14.7708	0.107579	0.0835883	0.0759196	0.118881	0.119221	0.0550639	0.0239941	0.00684488	0.00284202
100.271	14.8125	0.111541	0.0880711	0.0783272	0.125921	0.117549	0.0531098	0.019519	0.00582025	0.00283887
100.271	14.8542	0.113884	0.0862869	0.0744581	0.122442	0.114148	0.0485294	0.0165127	0.00508643	0.0028219
100.271	14.8958	0.119263	0.0834848	0.0735181	0.122414	0.116922	0.0463145	0.0149623	0.00461188	0.00286642
100.271	14.9375	0.120146	0.0809835	0.0751452	0.139336	0.122528	0.0429133	0.0137538	0.00392141	0.00261529
100.271	14.9792	0.114246	0.0767706	0.0690939	0.144421	0.126992	0.0434795	0.0139223	0.00401948	0.0024949
100.271	15.0208	0.0859624	0.0606261	0.056907	0.121384	0.106488	0.033895	0.011863	0.00376981	0.00188437
100.271	15.0625	0.0804996	0.0598838	0.0642023	0.129105	0.115155	0.0354277	0.0145792	0.00401595	0.00212794
100.271	15.1042	0.0798058	0.0571457	0.060107	0.141473	0.121329	0.0392483	0.017329	0.00454912	0.00219375
100.271	15.1458	0.0873788	0.0626461	0.0712532	0.187425	0.15507	0.0494423	0.0249472	0.0073745	0.00307925
100.271	15.1875	0.0977335	0.0761128	0.0880763	0.228476	0.203346	0.0658673	0.0358359	0.0127286	0.00572716
100.271	15.2292	0.0961318	0.0711625	0.0810893	0.250846	0.224677	0.0817186	0.048371	0.0198023	0.00931198
100.271	15.2708	0.0849618	0.0671835	0.0709677	0.252932	0.234884	0.0876307	0.0634535	0.0275815	0.0132042
100.271	15.3125	0.080862	0.061319	0.0723437	0.263628	0.230104	0.0891093	0.0795195	0.0371274	0.0199495
100.271	15.3542	0.0796132	0.0702901	0.0786879	0.282332	0.260432	0.104209	0.108035	0.0524031	0.0322915
100.271	15.3958	0.0835487	0.0735193	0.092117	0.320211	0.287787	0.12763	0.142114	0.086945	0.0537128
100.271	15.4375	0.110646	0.0933012	0.110603	0.373203	0.357154	0.160854	0.187221	0.135371	0.0945813
100.271	15.4792	0.124521	0.0971834	0.118766	0.387375	0.359885	0.1834	0.202132	0.196636	0.130147
100.271	15.5208	0.148842	0.106633	0.125196	0.388589	0.357874	0.212427	0.256168	0.245863	0.178465
100.271	15.5625	0.173297	0.113781	0.11851	0.361688	0.345928	0.20245	0.238926	0.205593	0.160742
100.271	15.6042	0.230056	0.146609	0.140115	0.389711	0.370525	0.21467	0.250723	0.214532	0.17164
100.271	15.6458	0.336187	0.212258	0.184763	0.451681	0.401726	0.26321	0.29681	0.262376	0.194774
100.271	15.6875	0.342897	0.223031	0.177159	0.405985	0.35947	0.244743	0.257652	0.202492	0.165219
100.271	15.7292	0.38825	0.247969	0.182233	0.349569	0.309353	0.235605	0.214771	0.159982	0.122241
100.271	15.7708	0.457541	0.279761	0.200842	0.3348	0.309957	0.227137	0.185061	0.139744	0.104571
100.271	15.8125	0.557707	0.329492	0.228268	0.313205	0.293108	0.228537	0.18655	0.128443	0.0892527
100.271	15.8542	0.727505	0.456318	0.313292	0.382899	0.316013	0.269485	0.211246	0.14391	0.11286
100.271	15.8958	0.805362	0.567006	0.347654	0.365535	0.31544	0.301868	0.20083	0.128849	0.108546
100.271	15.9375	0.817296	0.545368	0.310482	0.285518	0.235627	0.270109	0.156467	0.0886802	0.0728218
100.271	15.9792	0.867946	0.63911	0.378544	0.299106	0.27072	0.307972	0.18853	0.0979466	0.0756569
100.271	16.0208	0.883999	0.649205	0.36508	0.272462	0.245565	0.304721	0.173968	0.0979242	0.0752851
100.271	16.0625	0.846136	0.574466	0.32698	0.235479	0.222018	0.3023	0.154428	0.0928268	0.0736086
100.271	16.1042	0.786611	0.499357	0.281823	0.177972	0.192009	0.273723	0.142268	0.083161	0.0693917
100.271	16.1458	0.712798	0.420026	0.247037	0.144241	0.153331	0.252446	0.129572	0.0737957	0.0699091
100.271	16.1875	0.567493	0.290874	0.172374	0.108923	0.119463	0.23044	0.11302	0.0674906	0.065673
100.271	16.2292	0.288035	0.134758	0.0996619	0.0684997	0.0874277	0.185817	0.0937193	0.0559655	0.0608925
100.271	16.2708	0.109933	0.0583995	0.0525735	0.0438272	0.0598212	0.160236	0.0754262	0.0475264	0.0488778
100.271	16.3125	0.170411	0.085979	0.0731443	0.0486104	0.065455	0.166165	0.0820197	0.0493457	0.0506447
100.271	16.3542	0.272263	0.13755	0.0996963	0.0585707	0.0681523	0.187684	0.0837402	0.0537141	0.0588305
100.271	16.3958	0.397274	0.205466	0.141265	0.0702486	0.068783	0.201209	0.0871339	0.0566239	0.0590753
100.271	16.4375	0.406012	0.223192	0.144353	0.0698364	0.0689356	0.192592	0.0791381	0.0500786	0.0580905
100.271	16.4792	0.421755	0.240565	0.159457	0.069446	0.0706482	0.191246	0.0794546	0.0505984	0.060584
100.271	16.5208	0.423438	0.256178	0.194361	0.0751743	0.0741214	0.194503	0.0913361	0.0625069	0.0707219
100.271	16.5625	0.361005	0.229762	0.201105	0.0774558	0.0802941	0.203259	0.105054	0.0633581	0.0732278
100.271	16.6042	0.250918	0.175814	0.178217	0.0791398	0.0869344	0.213115	0.0997399	0.0555413	0.0663025
100.271	16.6458	0.161759	0.128905	0.158444	0.085775	0.0876633	0.210077	0.0894351	0.0544323	0.0557621
100.271	16.6875	0.096137	0.0917834	0.131588	0.0809745	0.08804	0.200358	0.0837722	0.0492092	0.0463373
100.271	16.7292	0.0517364	0.0554301	0.102394	0.0697568	0.0821494	0.178086	0.0772979	0.039139	0.0332265
100.271	16.7708	0.0303803	0.0380463	0.0866571	0.0686398	0.0831841	0.164192	0.0653024	0.0334364	0.0262703
100.271	16.8125	0.0167659	0.0261957	0.0700271	0.0600481	0.0703368	0.142969	0.0573993	0.0235236	0.019899
100.271	16.8542	0.0217796	0.0358344	0.0917456	0.0758866	0.087414	0.152706	0.0602445	0.0223385	0.0164152
100.271	16.8958	0.0544927	0.0732513	0.17529	0.117602	0.118621	0.217108	0.0712223	0.0251305	0.0183539
100.271	16.9375	0.139981	0.168239	0.304138	0.192984	0.189376	0.312157	0.0985603	0.0303942	0.023299
100.271	16.9792	0.26	0.285818	0.411915	0.256631	0.239164	0.330152	0.106507	0.0299004	0.0208128
100.271	17.0208	0.416743	0.43813	0.55021	0.357704	0.290044	0.360173	0.118581	0.0277534	0.0204876
100.271	17.0625	0.38546	0.428336	0.551836	0.321768	0.273068	0.330642	0.106339	0.0221741	0.0145342
100.271	17.1042	0.367277	0.418107	0.554594	0.328317	0.27607	0.340573	0.100308	0.0231873	0.0127464
100.271	17.1458	0.340559	0.381217	0.542092	0.323769	0.287135	0.337821	0.0932916	0.0212576	0.0118245
100.271	17.1875	0.299464	0.364789	0.530528	0.313018	0.260689	0.329637	0.0875817	0.0191587	0.0100249
100.271	17.2292	0.125808	0.200893	0.399787	0.241552	0.236754	0.304257	0.0778793	0.0186695	0.0105537
100.271	17.2708	0.0234974	0.0462189	0.140699	0.103349	0.111455	0.158114	0.0353653	0.00807452	0.00413313
100.271	17.3125	0.0108892	0.0249886	0.0992986	0.0777799	0.090781	0.135812	0.0304239	0.00674323	0.00348022
100.271	17.3542	0.0139609	0.0341944	0.14622	0.128655	0.159182	0.229239	0.059597	0.0119637	0.00648849
100.271	17.3958	0.0138459	0.0306891	0.123064	0.0995535	0.133167	0.193065	0.0537923	0.00959565	0.00479691
100.271	17.4375	0.0108374	0.0227721	0.0879955	0.0821074	0.0984159	0.151043	0.0418679	0.00723981	0.00356371
100.271	17.4792	0.0148744	0.0314226	0.115685	0.103004	0.110305	0.206716	0.0572351	0.00950855	0.00387676
100.271	17.5208	0.0169387	0.0384102	0.108808	0.106926	0.135727	0.2082	0.0714308	0.0115688	0.00475849
100.271	17.5625	0.0209199	0.0374092	0.106173	0.0995017	0.133913	0.231327	0.0736149	0.0116424	0.00512507
100.271	17.6042	0.0223791	0.0448689	0.112972	0.102126	0.137787	0.244186	0.0715205	0.0129402	0.00542622
100.271	17.6458	0.0389208	0.0667152	0.176609	0.136818	0.192005	0.315207	0.0979511	0.0192884	0.00878406
100.271	17.6875	0.0365147	0.0601833	0.154216	0.125653	0.150109	0.259524	0.0842687	0.015721	0.00728643
100.271	17.7292	0.054127	0.089355	0.195994	0.156572	0.192063	0.350928	0.115687	0.0193353	0.0111143
100.271	17.7708	0.0550772	0.0865282	0.183802	0.139256	0.175235	0.309561	0.100536	0.0189984	0.0104843
100.271	17.8125	0.0437406	0.0716052	0.148873	0.103898	0.134013	0.251642	0.0743976	0.0175641	0.0103634
100.271	17.8542	0.0380952	0.0665675	0.148019	0.0867465	0.107374	0.226666	0.0710983	0.0189205	0.0099995
100.271	17.8958	0.0457868	0.0747308	0.152991	0.0895763	0.120899	0.235413	0.0780446	0.0233076	0.0133469
100.271	17.9375	0.0486102	0.0786485	0.165737	0.09754	0.142615	0.216756	0.0915204	0.0255332	0.0163022
100.271	17.9792	0.0524865	0.086696	0.176903	0.10889	0.15238	0.219337	0.093145	0.0290744	0.0197856
100.271	18.0208	0.0586436	0.0921785	0.16362	0.111807	0.15189	0.223497	0.0956349	0.0325983	0.0214891
100.271	18.0625	0.0594687	0.0962937	0.185895	0.120858	0.144569	0.24651	0.113559	0.0442303	0.0287432
100.271	18.1042	0.0602193	0.100978	0.194623	0.124773	0.149837	0.25742	0.130795	0.0513529	0.0331069
100.271	18.1458	0.0626245	0.0969118	0.206793	0.132224	0.158908	0.246539	0.138212	0.0569601	0.040763
100.271	18.1875	0.066255	0.110472	0.202832	0.14715	0.160234	0.264356	0.136558	0.0695491	0.05144
100.271	18.2292	0.102658	0.1635	0.280429	0.198378	0.214006	0.348374	0.18792	0.116764	0.0898326
100.271	18.2708	0.106424	0.163113	0.302382	0.200858	0.215674	0.340983	0.189892	0.129027	0.100405
100.271	18.3125	0.080539	0.140298	0.271034	0.153485	0.19069	0.280328	0.14768	0.11332	0.0855105
100.271	18.3542	0.0986868	0.151837	0.294754	0.187188	0.207747	0.313456	0.171323	0.148443	0.133981
100.271	18.3958	0.0719352	0.112073	0.221773	0.139087	0.167451	0.26036	0.12211	0.118534	0.11096
100.271	18.4375	0.0782563	0.114484	0.228802	0.151726	0.196435	0.290152	0.135766	0.117322	0.126068
100.271	18.4792	0.0893688	0.11197	0.23103	0.161251	0.186242	0.307136	0.144932	0.130794	0.133256
100.271	18.5208	0.0918223	0.102132	0.229371	0.158459	0.195838	0.301731	0.138865	0.120231	0.146328
100.271	18.5625	0.0891648	0.103102	0.219539	0.160439	0.189331	0.32792	0.144677	0.122362	0.140903
100.271	18.6042	0.0875034	0.105174	0.22306	0.147343	0.194108	0.317946	0.130659	0.11914	0.137521
100.271	18.6458	0.0819807	0.108462	0.218927	0.140902	0.195724	0.325247	0.140052	0.118143	0.144113
100.271	18.6875	0.0762108	0.115786	0.21646	0.137249	0.196987	0.347898	0.152663	0.118186	0.151088
100.271	18.7292	0.0765194	0.112376	0.227662	0.133354	0.17534	0.343	0.141629	0.123112	0.15102
100.271	18.7708	0.0859505	0.118622	0.232371	0.144439	0.165529	0.344813	0.158208	0.129843	0.158977
100.271	18.8125	0.081998	0.117951	0.227355	0.133671	0.168297	0.347638	0.150066	0.113603	0.170231
100.271	18.8542	0.0831142	0.122603	0.22415	0.132534	0.157786	0.331059	0.142941	0.112909	0.146106
100.271	18.8958	0.111024	0.142785	0.261017	0.153553	0.187848	0.381849	0.1772	0.146845	0.172464
100.271	18.9375	0.0970604	0.134661	0.220858	0.128403	0.178865	0.335907	0.154533	0.131461	0.146864
100.271	18.9792	0.095546	0.137033	0.218715	0.117251	0.170199	0.327674	0.15983	0.147716	0.151392
100.271	19.0208	0.0778892	0.108434	0.175975	0.0823224	0.12508	0.267013	0.125165	0.114013	0.123454
100.271	19.0625	0.0759834	0.105733	0.171731	0.0821719	0.11567	0.265794	0.128792	0.108823	0.128828
100.271	19.1042	0.0768996	0.10769	0.176353	0.0858517	0.113109	0.27967	0.152336	0.120317	0.130097
100.271	19.1458	0.0707913	0.104903	0.183938	0.0896222	0.120221	0.299147	0.158321	0.122447	0.133902
100.271	19.1875	0.0733977	0.110015	0.203456	0.0908257	0.121882	0.304456	0.165805	0.123704	0.134243
100.271	19.2292	0.0750248	0.108054	0.202936	0.0899539	0.115597	0.297252	0.172909	0.137549	0.139559
100.271	19.2708	0.0724629	0.101558	0.198458	0.0929708	0.115187	0.29018	0.161131	0.133295	0.134634
100.271	19.3125	0.0740175	0.0952893	0.197429	0.089613	0.113778	0.294756	0.159006	0.129317	0.132202
100.271	19.3542	0.0747506	0.0982164	0.185808	0.0866565	0.119964	0.286848	0.16459	0.132097	0.136946
100.271	19.3958	0.0799243	0.112149	0.19334	0.0949231	0.113899	0.286241	0.176561	0.140768	0.158604
100.271	19.4375	0.0697625	0.102989	0.192984	0.088457	0.11338	0.270038	0.185277	0.137348	0.153757
100.271	19.4792	0.0576806	0.0950025	0.175532	0.0843701	0.106217	0.245863	0.17841	0.136826	0.134365
100.271	19.5208	0.0806014	0.119456	0.220165	0.118218	0.149791	0.306499	0.198886	0.159588	0.174135
100.271	19.5625	0.0785222	0.105455	0.199591	0.109808	0.138299	0.295779	0.183551	0.139038	0.151349
100.271	19.6042	0.0869277	0.103458	0.193519	0.101357	0.157322	0.30626	0.181553	0.145413	0.135688
100.271	19.6458	0.0870813	0.103354	0.204523	0.104191	0.157071	0.299293	0.186429	0.145724	0.129305
100.271	19.6875	0.0843986	0.109643	0.196155	0.100426	0.154666	0.296456	0.182009	0.131192	0.126617
100.271	19.7292	0.0899059	0.120515	0.178718	0.115603	0.159218	0.297844	0.193448	0.125847	0.135294
100.271	19.7708	0.0867572	0.114694	0.183483	0.125904	0.165939	0.304899	0.196182	0.131135	0.12903
100.271	19.8125	0.0775738	0.117786	0.182781	0.131398	0.186462	0.341321	0.184916	0.129878	0.115942
100.271	19.8542	0.0776149	0.0998508	0.16979	0.127079	0.171228	0.308026	0.171532	0.102925	0.0879243
100.271	19.8958	0.0655878	0.0826906	0.166712	0.122212	0.146733	0.274511	0.137341	0.0793516	0.0737733
100.271	19.9375	0.0652977	0.0915544	0.158309	0.108138	0.129404	0.232907	0.125382	0.0702221	0.0562179
100.271	19.9792	0.0646893	0.0891025	0.154749	0.107148	0.117557	0.206051	0.117741	0.0629667	0.0544499
100.271	20.0208	0.0592149	0.0863939	0.150255	0.0979903	0.108242	0.195414	0.105717	0.0554405	0.055305
100.271	20.0625	0.0589178	0.0882852	0.132425	0.0880327	0.0969455	0.175411	0.0891479	0.0468975	0.0521389
100.271	20.1042	0.054042	0.0798318	0.127889	0.0740174	0.0773569	0.134301	0.0767625	0.0414167	0.0388684
100.271	20.1458	0.0500545	0.0720477	0.113606	0.0661155	0.0714022	0.115203	0.0660591	0.0317115	0.0291795
100.271	20.1875	0.0494176	0.059877	0.10496	0.0592539	0.0610955	0.0806837	0.043583	0.0206576	0.0202618
100.271	20.2292	0.0464299	0.0579218	0.0888337	0.0556388	0.0497647	0.0671375	0.0344455	0.0170953	0.0163369
100.271	20.2708	0.0451416	0.0506729	0.0800656	0.0514487	0.0412377	0.0464389	0.0240422	0.014005	0.0128706
100.271	20.3125	0.0371898	0.0488907	0.0681253	0.0449169	0.0400459	0.0409837	0.0204412	0.0121441	0.0105017
100.271	20.3542	0.0351467	0.0440336	0.0515368	0.038926	0.0331247	0.0305628	0.0154574	0.00871909	0.00872658
100.271	20.3958	0.0352373	0.0399691	0.0484384	0.0325812	0.028537	0.0242781	0.0102757	0.00711067	0.00706164
100.271	20.4375	0.0329963	0.0378483	0.0496976	0.0299201	0.0250961	0.0196015	0.00861295	0.00598889	0.00579546
100.271	20.4792	0.0337272	0.0378205	0.0433237	0.0262516	0.017753	0.0144795	0.00718342	0.00469763	0.00459522
100.271	20.5208	0.0310247	0.0346322	0.0360824	0.0199798	0.0143336	0.0121549	0.00610132	0.003795	0.00377874
100.271	20.5625	0.0274791	0.0298408	0.0328719	0.0208313	0.0137248	0.0102862	0.00643009	0.00410728	0.00390902
100.271	20.6042	0.026244	0.0254396	0.0240119	0.0173669	0.011678	0.0100821	0.00611193	0.00427479	0.00446413
100.271	20.6458	0.0238291	0.0243879	0.0214604	0.0144752	0.00985641	0.00937801	0.00513856	0.00471063	0.00453318
100.271	20.6875	0.019934	0.0214386	0.018201	0.0114833	0.00804282	0.00732855	0.00457116	0.00434242	0.00412123
100.271	20.7292	0.0166094	0.0187438	0.0165089	0.0094343	0.00705734	0.00605254	0.00418333	0.00380746	0.00349451
100.271	6.72917	0.0170933	0.00914232	0.00696769	0.0105671	0.00683014	0.00619397	0.00997497	0.00898101	0.00691349
100.271	6.77083	0.0141016	0.00708088	0.00590767	0.00896891	0.00536218	0.00489877	0.00799143	0.00738521	0.00486919
100.271	6.8125	0.013001	0.00682226	0.00513021	0.00837588	0.00441292	0.0042127	0.00805149	0.00661856	0.00463769
100.271	6.85417	0.013353	0.0077764	0.00586115	0.00931028	0.0051142	0.00498128	0.00896353	0.00713182	0.00455856
100.271	6.89583	0.0152639	0.00790054	0.00603179	0.0102558	0.00611478	0.00529962	0.0089716	0.0062825	0.00450002
100.271	6.9375	0.0200527	0.0102322	0.00851475	0.0136417	0.00866402	0.00648583	0.0114732	0.00781617	0.00553795
100.271	6.97917	0.0191615	0.0104586	0.00930647	0.0134128	0.00863085	0.00665657	0.00887118	0.00735007	0.00500518
100.271	7.02083	0.017532	0.00955238	0.00832971	0.0111203	0.00730418	0.00716748	0.00834256	0.00669717	0.00470135
100.271	7.0625	0.0247777	0.0133195	0.0112168	0.0143391	0.00947374	0.00911105	0.0106081	0.00762626	0.00549391
100.271	7.10417	0.026759	0.0163197	0.013399	0.0165526	0.0108845	0.00932782	0.0110802	0.00819506	0.00594761
100.271	7.14583	0.0330383	0.0186151	0.0160491	0.0180852	0.0120305	0.0102311	0.0114218	0.00770074	0.00540064
100.271	7.1875	0.0392748	0.0201612	0.0175797	0.0207965	0.0129598	0.00959195	0.0114985	0.00811681	0.00548078
100.271	7.22917	0.0363397	0.0204063	0.0165616	0.0215333	0.011511	0.00869406	0.00987747	0.00748456	0.00524964
100.271	7.27083	0.0356818	0.0245874	0.0192033	0.0254331	0.0131826	0.00822882	0.0105714	0.00804522	0.00605808
100.271	7.3125	0.0361865	0.0261519	0.0212813	0.026992	0.0121545	0.00748867	0.00944843	0.00772244	0.00572338
100.271	7.35417	0.0306202	0.0219119	0.018417	0.0231507	0.00925206	0.00605759	0.00795517	0.00661748	0.00509353
100.271	7.39583	0.0342511	0.0202866	0.0190379	0.0239226	0.01015	0.00656682	0.00903253	0.00701753	0.00492608
100.271	7.52083	0.0338531	0.024253	0.0193749	0.0232938	0.0102118	0.00735106	0.0109033	0.00705649	0.00579548
100.271	7.5625	0.0338042	0.021324	0.0183722	0.022061	0.00955887	0.00726209	0.0100264	0.00725763	0.00617368
100.271	7.60417	0.0346695	0.023889	0.0205429	0.0235556	0.0105318	0.00814228	0.0104661	0.00794483	0.00684257
100.271	7.77083	0.0330545	0.0215078	0.0211403	0.0207771	0.00979715	0.00881197	0.00898031	0.00943885	0.00757305
100.271	7.8125	0.0285612	0.0208622	0.0205684	0.0203904	0.00968532	0.00862429	0.00838248	0.00822975	0.00767302
100.271	7.85417	0.0278328	0.0228055	0.0227203	0.021447	0.0106248	0.00863127	0.0087785	0.00833988	0.00835614
100.271	7.89583	0.028296	0.0251625	0.0257724	0.0221373	0.0109735	0.00892355	0.00925687	0.00919446	0.0085329
100.271	7.9375	0.0394192	0.0315542	0.0357723	0.0259738	0.0120535	0.0107962	0.0115905	0.0118684	0.0113224
100.271	7.97917	0.0385574	0.0336023	0.0350397	0.0279405	0.0129376	0.0102805	0.010736	0.0117116	0.0113041
100.271	8.02083	0.0266487	0.0272464	0.0246782	0.0206303	0.010675	0.00844861	0.00842896	0.00894906	0.00849595
100.271	8.0625	0.02974	0.0254003	0.0253409	0.020465	0.0104748	0.00831072	0.00783369	0.00788564	0.0081601
100.271	8.10417	0.0229197	0.0240081	0.0218891	0.0174919	0.00943559	0.00759788	0.00792289	0.00717593	0.00670707
100.271	8.14583	0.021663	0.021115	0.0213275	0.019036	0.0108454	0.00690793	0.00712304	0.00701539	0.00573065
100.271	8.1875	0.0230484	0.0222125	0.0229687	0.0192517	0.0112936	0.00740204	0.0065565	0.00625434	0.00670357
100.271	8.22917	0.0205798	0.0225578	0.0216549	0.0202028	0.0116919	0.00695242	0.00724899	0.00582745	0.00716613
100.271	8.27083	0.024993	0.0271084	0.0273699	0.0237367	0.0133519	0.0102529	0.00937497	0.00785205	0.0101433
100.312	13.5208	0.0988782	0.0384593	0.0301761	0.104438	0.112981	0.0173537	0.00379942	0.00391437	0.00394364
100.312	13.5625	0.103489	0.0388059	0.0309178	0.111438	0.125561	0.0169446	0.0033411	0.00401218	0.00375926
100.312	13.6042	0.0906078	0.0309113	0.0234571	0.0887887	0.101196	0.012426	0.00287025	0.00349418	0.00328
100.312	13.6458	0.086108	0.03079	0.0233088	0.0892024	0.0871808	0.0110206	0.00276826	0.00354164	0.00338988
100.312	13.6875	0.0806458	0.0271331	0.0227185	0.083818	0.0740994	0.0086972	0.00254562	0.00342542	0.00309794
100.312	13.7292	0.0778754	0.0259987	0.0214326	0.0774349	0.0629926	0.00733886	0.00225238	0.00324556	0.00272464
100.312	13.7708	0.0843869	0.0253732	0.0214528	0.085268	0.0571769	0.00581293	0.00208219	0.00285854	0.00215293
100.312	13.8125	0.0904221	0.0290617	0.0237227	0.0866641	0.0625103	0.00608269	0.00239762	0.0032808	0.00232533
100.312	13.8542	0.154173	0.0482381	0.0418024	0.143044	0.108175	0.0125702	0.00483348	0.00614091	0.00370962
100.312	13.8958	0.170134	0.0571366	0.0492033	0.170131	0.134997	0.0178548	0.00686448	0.00754719	0.00423265
100.312	13.9375	0.168569	0.0626297	0.0614285	0.186144	0.171706	0.0260272	0.0107312	0.00943403	0.00501554
100.312	13.9792	0.15888	0.060973	0.0617087	0.182517	0.177825	0.0303166	0.0111443	0.0099109	0.00478107
100.312	14.0208	0.153652	0.0693215	0.0674254	0.177978	0.161486	0.0312286	0.0119491	0.00930198	0.00434805
100.312	14.0625	0.141176	0.0686757	0.0672367	0.185208	0.146597	0.0299586	0.0121086	0.0080966	0.00420055
100.312	14.1042	0.136462	0.0643082	0.0666037	0.165753	0.1339	0.0297201	0.011888	0.00683056	0.0037521
100.312	14.1458	0.137195	0.0655448	0.0710768	0.162211	0.124717	0.0324854	0.0113104	0.00613669	0.00337714
100.312	14.1875	0.123746	0.0673076	0.0703749	0.155063	0.110274	0.0292036	0.00980489	0.00511005	0.00286653
100.312	14.2292	0.0922123	0.0530076	0.0528293	0.103625	0.0765427	0.0215557	0.00779992	0.00359218	0.00197309
100.312	14.2708	0.0923099	0.0553359	0.0555237	0.104098	0.0765032	0.0208691	0.00827198	0.00398778	0.00211897
100.312	14.3125	0.0854317	0.0536709	0.0520595	0.0892202	0.0693413	0.0239975	0.00873127	0.00391433	0.00189418
100.312	14.3542	0.0856868	0.0588041	0.0556045	0.0846771	0.0675661	0.0259052	0.00985782	0.00358647	0.00171858
100.312	14.3958	0.0823465	0.0582095	0.0530606	0.0839599	0.0658229	0.0283738	0.0114804	0.00372127	0.00159786
100.312	14.4375	0.078782	0.0562263	0.0503517	0.0861212	0.0621058	0.0307789	0.0132985	0.00394726	0.00153782
100.312	14.4792	0.101382	0.0745321	0.0653966	0.0992647	0.0822857	0.0461905	0.0222196	0.0062663	0.00235134
100.312	14.5208	0.106706	0.0760497	0.0716932	0.108072	0.0913395	0.0578715	0.031562	0.00769888	0.00271919
100.312	14.5625	0.106935	0.0726338	0.0713721	0.115202	0.0954421	0.0635069	0.0387957	0.00904404	0.00305603
100.312	14.6042	0.106837	0.0758981	0.073641	0.11565	0.105714	0.0735262	0.0472309	0.0112445	0.00330629
100.312	14.6458	0.0911183	0.0637761	0.0609765	0.09436	0.085935	0.0593995	0.0379626	0.0089827	0.00263539
100.312	14.6875	0.113365	0.0825854	0.0797505	0.120151	0.113686	0.0689916	0.0385072	0.00989129	0.00339894
100.312	14.7292	0.109069	0.0807919	0.0766413	0.119229	0.110373	0.0614798	0.0304594	0.00820211	0.00328058
100.312	14.7708	0.116041	0.0817459	0.0777191	0.12167	0.109692	0.0560995	0.0240429	0.00689135	0.00325266
100.312	14.8125	0.119752	0.0847051	0.0776331	0.12847	0.118873	0.0534907	0.0198728	0.006013	0.00319374
100.312	14.8542	0.120041	0.0846037	0.0744168	0.13015	0.124665	0.0474338	0.0154964	0.00515526	0.00303614
100.312	14.8958	0.119372	0.0819231	0.0733138	0.126718	0.122587	0.0436659	0.0123615	0.00458788	0.00330085
100.312	14.9375	0.0932512	0.06556	0.0580993	0.109359	0.0965871	0.0325885	0.00869184	0.00316838	0.00222774
100.312	14.9792	0.0911952	0.0653924	0.0608153	0.117017	0.106588	0.0328213	0.0104415	0.00358165	0.00243012
100.312	15.0208	0.100875	0.0774245	0.0743608	0.146808	0.131301	0.0430086	0.0158197	0.00482767	0.00281645
100.312	15.0625	0.0918756	0.0687518	0.0703487	0.147595	0.131498	0.0416785	0.0183004	0.00535498	0.00293227
100.312	15.1042	0.0953312	0.0764096	0.0834621	0.187296	0.171952	0.053327	0.0256754	0.00729903	0.00415247
100.312	15.1458	0.0947507	0.0754204	0.0867878	0.238197	0.208429	0.0606358	0.0320468	0.00993844	0.00437528
100.312	15.1875	0.0942615	0.0757894	0.0905715	0.258667	0.228324	0.0755133	0.0432587	0.0145402	0.00695322
100.312	15.2292	0.0934611	0.0723338	0.0879623	0.27136	0.234858	0.0859295	0.0546519	0.0201361	0.0107247
100.312	15.2708	0.0734771	0.0554798	0.0671571	0.216284	0.209437	0.0731327	0.0540206	0.022669	0.0127557
100.312	15.3125	0.0801559	0.0660669	0.0738935	0.275187	0.25079	0.0915074	0.072835	0.0386594	0.0204932
100.312	15.3542	0.0852593	0.0713138	0.0805455	0.310649	0.278842	0.11273	0.103779	0.0538112	0.0309859
100.312	15.3958	0.0963441	0.0814276	0.10191	0.346396	0.329066	0.148876	0.146975	0.0849071	0.0479704
100.312	15.4375	0.108899	0.0875455	0.10166	0.357276	0.340308	0.146412	0.171603	0.111375	0.0710196
100.312	15.4792	0.114023	0.0873441	0.105951	0.360087	0.316796	0.153365	0.180361	0.15783	0.100698
100.312	15.5208	0.136498	0.0958728	0.111991	0.360764	0.32555	0.165666	0.203615	0.187757	0.129127
100.312	15.5625	0.169394	0.122271	0.125253	0.364977	0.351139	0.194648	0.222502	0.196709	0.13493
100.312	15.6042	0.242682	0.150469	0.138139	0.381601	0.352551	0.223764	0.239558	0.194845	0.141993
100.312	15.6458	0.281757	0.164943	0.14469	0.370929	0.350792	0.211585	0.241866	0.182295	0.144272
100.312	15.6875	0.314586	0.202708	0.166301	0.365979	0.342572	0.220851	0.22945	0.164713	0.128131
100.312	15.7292	0.379722	0.24275	0.19703	0.362217	0.329271	0.218006	0.195216	0.141961	0.115971
100.312	15.7708	0.481025	0.290341	0.211427	0.343264	0.309896	0.217995	0.180085	0.120356	0.0968397
100.312	15.8125	0.642469	0.428123	0.30037	0.37035	0.343155	0.27737	0.21924	0.142698	0.107677
100.312	15.8542	0.72552	0.493635	0.314856	0.342761	0.301722	0.256295	0.200389	0.123995	0.102213
100.312	15.8958	0.81102	0.565981	0.327151	0.334442	0.283481	0.269449	0.186316	0.0971508	0.0920912
100.312	15.9375	0.847304	0.588751	0.316496	0.291402	0.232373	0.244659	0.148455	0.0757789	0.0656864
100.312	15.9792	0.867088	0.592509	0.326018	0.264958	0.217659	0.234587	0.145074	0.0717098	0.0575642
100.312	16.0208	0.84785	0.590977	0.335295	0.260194	0.21696	0.267113	0.160616	0.084231	0.0703582
100.312	16.0625	0.789909	0.515708	0.284954	0.205927	0.192468	0.261627	0.131249	0.0788102	0.0643279
100.312	16.1042	0.723029	0.428254	0.243947	0.168189	0.159865	0.256838	0.123105	0.0743573	0.0621092
100.312	16.1458	0.63451	0.343104	0.202336	0.123464	0.134726	0.236302	0.117935	0.0646468	0.0599474
100.312	16.1875	0.534337	0.266816	0.15207	0.0892534	0.111311	0.207563	0.0972242	0.0596039	0.0574476
100.312	16.2292	0.394181	0.182652	0.108551	0.0688849	0.0898275	0.185072	0.0852266	0.0534638	0.0557675
100.312	16.2708	0.209769	0.100258	0.0733026	0.0505869	0.0688047	0.16563	0.0760729	0.0478932	0.0505337
100.312	16.3125	0.32469	0.152617	0.110176	0.0573101	0.0737049	0.17235	0.0789476	0.0487737	0.0529268
100.312	16.3542	0.344848	0.171232	0.119949	0.0608968	0.067162	0.184391	0.081461	0.0507933	0.0578009
100.312	16.3958	0.359614	0.186533	0.126088	0.0630863	0.0609468	0.183341	0.078549	0.0546102	0.0536008
100.312	16.4375	0.343262	0.185261	0.123129	0.0555605	0.0569922	0.155145	0.0687128	0.0438414	0.0505534
100.312	16.4792	0.355711	0.203459	0.144782	0.0558178	0.0565908	0.154179	0.074002	0.0472219	0.0561904
100.312	16.5208	0.374846	0.224689	0.179303	0.0662833	0.0638088	0.181196	0.0827153	0.061734	0.0704973
100.312	16.5625	0.338442	0.211827	0.182534	0.0722871	0.0659258	0.18868	0.0944575	0.0691396	0.082159
100.312	16.6042	0.2431	0.164865	0.171542	0.0760601	0.0790254	0.199295	0.0932661	0.0635311	0.0774199
100.312	16.6458	0.152711	0.122612	0.159302	0.0819082	0.0866208	0.202838	0.092578	0.0542535	0.0644933
100.312	16.6875	0.0986783	0.0943885	0.130561	0.0827704	0.0873649	0.201514	0.0940402	0.054397	0.0591554
100.312	16.7292	0.0602571	0.067425	0.117472	0.084176	0.0942247	0.203756	0.0942855	0.0560483	0.050929
100.312	16.7708	0.0345624	0.0470198	0.104624	0.0845647	0.098019	0.1969	0.0837812	0.0481026	0.0412078
100.312	16.8125	0.0152385	0.0248713	0.0748081	0.0620971	0.076045	0.155779	0.0646005	0.0312913	0.0254334
100.312	16.8542	0.017862	0.0292199	0.0906157	0.079273	0.0917696	0.177412	0.0685223	0.0304555	0.0238198
100.312	16.8958	0.0398919	0.0583996	0.160343	0.112405	0.127233	0.237691	0.0821978	0.0321227	0.023849
100.312	16.9375	0.0841444	0.108238	0.234254	0.153093	0.158181	0.276722	0.0875124	0.0330155	0.0230199
100.312	16.9792	0.151151	0.184163	0.345052	0.203604	0.198678	0.292495	0.0968524	0.0308205	0.021234
100.312	17.0208	0.267469	0.292499	0.468329	0.269519	0.229611	0.308076	0.107694	0.0283121	0.0212335
100.312	17.0625	0.441924	0.461362	0.582028	0.350042	0.285016	0.352623	0.110066	0.0282928	0.0178341
100.312	17.1042	0.384555	0.411956	0.523987	0.289178	0.243624	0.301589	0.0786719	0.0200182	0.0117402
100.312	17.1458	0.399876	0.458952	0.56801	0.352922	0.290037	0.350878	0.0976242	0.0247622	0.0147242
100.312	17.1875	0.400181	0.476342	0.593826	0.374108	0.313892	0.388604	0.11212	0.0280863	0.0152201
100.312	17.2292	0.164407	0.237844	0.417791	0.274858	0.251107	0.331033	0.0884377	0.0233195	0.0127879
100.312	17.2708	0.038373	0.0737156	0.197148	0.144783	0.145947	0.216857	0.0533137	0.0124549	0.00745747
100.312	17.3125	0.0113629	0.0239468	0.108355	0.0857516	0.100418	0.162999	0.038142	0.00878232	0.005348
100.312	17.3542	0.00544046	0.0129903	0.0661215	0.0575041	0.0834075	0.135421	0.031996	0.00683851	0.00370411
100.312	17.3958	0.0108587	0.0263155	0.117512	0.101247	0.145531	0.232935	0.0633936	0.0130973	0.00671115
100.312	17.4375	0.0153433	0.0353699	0.152264	0.125544	0.16084	0.24512	0.0758681	0.0145534	0.00783119
100.312	17.4792	0.0174263	0.0350453	0.134587	0.113097	0.137465	0.234553	0.0695997	0.0119507	0.00586893
100.312	17.5208	0.0139336	0.0278826	0.100512	0.0913517	0.10873	0.191854	0.0633594	0.0110711	0.00445795
100.312	17.5625	0.0180029	0.0344808	0.100188	0.0963945	0.123394	0.204403	0.0594792	0.0127529	0.00546591
100.312	17.6042	0.0258865	0.0487124	0.136911	0.115691	0.162591	0.266291	0.0824385	0.0161356	0.0073027
100.312	17.6458	0.0289669	0.0457216	0.135557	0.109641	0.140376	0.24317	0.0771218	0.0154891	0.00653387
100.312	17.6875	0.0359907	0.0634801	0.153293	0.126226	0.15555	0.276695	0.0897919	0.0167012	0.00845501
100.312	17.7292	0.0521088	0.0909874	0.198271	0.140962	0.188933	0.307646	0.115561	0.0210589	0.0106799
100.312	17.7708	0.0552862	0.100618	0.208373	0.13974	0.183527	0.327436	0.111599	0.0199163	0.0113479
100.312	17.8125	0.0539096	0.09394	0.186865	0.12527	0.176331	0.309943	0.0970133	0.0213426	0.0121846
100.312	17.8542	0.0376704	0.0664202	0.133258	0.0828013	0.119558	0.241225	0.0682735	0.0186453	0.00892557
100.312	17.8958	0.0458133	0.0780546	0.153031	0.0892901	0.130515	0.23804	0.077266	0.023041	0.0117067
100.312	17.9375	0.0502233	0.079535	0.145494	0.105502	0.132231	0.239592	0.0863151	0.0282145	0.0160202
100.312	17.9792	0.0565633	0.0925702	0.167306	0.108754	0.149082	0.254324	0.0990293	0.031908	0.0177082
100.312	18.0208	0.0593756	0.0966493	0.172857	0.118617	0.133537	0.254487	0.100183	0.0319636	0.0206079
100.312	18.0625	0.0637864	0.105798	0.184184	0.125466	0.150443	0.246387	0.112502	0.0399719	0.0255317
100.312	18.1042	0.0665912	0.113469	0.193494	0.129136	0.156464	0.26243	0.129543	0.0482786	0.0303513
100.312	18.1458	0.0677869	0.116239	0.204416	0.139797	0.171154	0.273064	0.135795	0.0569257	0.0389057
100.312	18.1875	0.0701195	0.11525	0.198212	0.151184	0.168216	0.276594	0.131409	0.065182	0.0480514
100.312	18.2292	0.0854006	0.145932	0.226709	0.154733	0.176599	0.291294	0.136946	0.0791105	0.0614349
100.312	18.2708	0.108089	0.17085	0.288786	0.17672	0.206985	0.323856	0.157899	0.10431	0.0851233
100.312	18.3125	0.0926339	0.157911	0.278251	0.170967	0.194209	0.293798	0.138701	0.11221	0.0874926
100.312	18.3542	0.097076	0.155568	0.286833	0.189582	0.221725	0.332883	0.169851	0.13094	0.12349
100.312	18.3958	0.0787947	0.11453	0.232063	0.153571	0.171851	0.284392	0.132248	0.106064	0.108361
100.312	18.4375	0.0830579	0.113388	0.232929	0.162432	0.178634	0.312721	0.141354	0.121725	0.111793
100.312	18.4792	0.0919661	0.114215	0.243101	0.172699	0.19898	0.31893	0.143327	0.127166	0.138035
100.312	18.5208	0.0939008	0.112711	0.242404	0.165309	0.217167	0.32219	0.154727	0.116439	0.150938
100.312	18.5625	0.0918346	0.111807	0.249978	0.167337	0.231738	0.350193	0.15185	0.118138	0.150909
100.312	18.6042	0.0959409	0.115769	0.248535	0.169718	0.23673	0.355239	0.153186	0.126141	0.150915
100.312	18.6458	0.0967225	0.122379	0.240585	0.159623	0.221965	0.364218	0.162151	0.12891	0.152546
100.312	18.6875	0.0888175	0.121927	0.230351	0.159029	0.221692	0.382981	0.173295	0.130176	0.16957
100.312	18.7292	0.0851875	0.124928	0.237383	0.14171	0.200342	0.404893	0.159704	0.132957	0.164109
100.312	18.7708	0.0908329	0.125791	0.239288	0.151761	0.204938	0.387305	0.175253	0.131787	0.174212
100.312	18.8125	0.0867148	0.1194	0.250032	0.151993	0.204123	0.371275	0.172537	0.125119	0.183308
100.312	18.8542	0.0883384	0.119048	0.228791	0.138018	0.181283	0.356153	0.15937	0.120381	0.159925
100.312	18.8958	0.0858254	0.116878	0.213721	0.114796	0.163473	0.330411	0.147261	0.117413	0.149679
100.312	18.9375	0.0903874	0.120533	0.209432	0.110916	0.149283	0.324238	0.143083	0.120429	0.135349
100.312	18.9792	0.0791408	0.114336	0.2008	0.103638	0.146104	0.314292	0.139389	0.13091	0.146006
100.312	19.0208	0.0749142	0.117343	0.193636	0.0911801	0.140736	0.30075	0.139396	0.127714	0.147311
100.312	19.0625	0.076338	0.116228	0.18594	0.0881964	0.123267	0.289879	0.137744	0.122355	0.14681
100.312	19.1042	0.0745592	0.110694	0.191638	0.090086	0.125682	0.293033	0.146595	0.126782	0.150601
100.312	19.1458	0.0695271	0.106788	0.181918	0.0955531	0.13086	0.299331	0.157406	0.132548	0.144546
100.312	19.1875	0.0743222	0.112829	0.181133	0.0894629	0.120814	0.304292	0.165423	0.129363	0.143317
100.312	19.2292	0.0769015	0.10785	0.187914	0.0941693	0.11961	0.286584	0.162243	0.129368	0.14173
100.312	19.2708	0.075267	0.102132	0.188145	0.0939262	0.113059	0.276365	0.144088	0.138267	0.129976
100.312	19.3125	0.0782177	0.0944948	0.186315	0.0906064	0.111084	0.271561	0.146252	0.128847	0.131357
100.312	19.3542	0.0722248	0.0922096	0.178684	0.0863089	0.105933	0.258469	0.13486	0.121061	0.123604
100.312	19.3958	0.0700545	0.0925841	0.17497	0.078386	0.106054	0.255073	0.145288	0.127197	0.138716
100.312	19.4375	0.0737756	0.0948432	0.17873	0.0804821	0.11005	0.243985	0.149424	0.12983	0.140556
100.312	19.4792	0.0662211	0.101058	0.17551	0.0833918	0.106645	0.225749	0.15154	0.12511	0.133883
100.312	19.5208	0.0612652	0.0857127	0.159314	0.088121	0.111944	0.228253	0.13506	0.116796	0.119594
100.312	19.5625	0.071202	0.0865108	0.165484	0.0915875	0.125243	0.259705	0.14954	0.11615	0.126472
100.312	19.6042	0.0858076	0.0980632	0.18582	0.105194	0.138328	0.27805	0.157818	0.124566	0.127543
100.312	19.6458	0.079966	0.101143	0.170822	0.101147	0.147953	0.272042	0.156264	0.128878	0.120495
100.312	19.6875	0.0901484	0.107839	0.179119	0.103579	0.152261	0.285375	0.163703	0.121871	0.133853
100.312	19.7292	0.0808318	0.107786	0.166701	0.117916	0.151809	0.268116	0.167579	0.117689	0.133618
100.312	19.7708	0.0867143	0.110572	0.170501	0.132315	0.164018	0.286537	0.190253	0.118114	0.123735
100.312	19.8125	0.0791692	0.10517	0.180101	0.133491	0.178191	0.298476	0.169904	0.120571	0.116826
100.312	19.8542	0.0762329	0.101289	0.183122	0.134906	0.172875	0.264215	0.153337	0.0921597	0.0826313
100.312	19.8958	0.0703171	0.102057	0.171404	0.120375	0.139492	0.24112	0.129144	0.0774723	0.0689805
100.312	19.9375	0.0639174	0.0857489	0.159208	0.108415	0.124783	0.205095	0.105863	0.0600385	0.0618843
100.312	19.9792	0.0636524	0.0898449	0.152508	0.101383	0.108461	0.182636	0.0918351	0.0482183	0.0483471
100.312	20.0208	0.0613349	0.0829673	0.144101	0.0890056	0.0967316	0.156476	0.0853598	0.0412712	0.0431838
100.312	20.0625	0.0567681	0.0759643	0.111985	0.0696631	0.0746878	0.116556	0.0631899	0.033888	0.029955
100.312	20.1042	0.0577385	0.0684973	0.103351	0.0695027	0.0642452	0.101156	0.0546396	0.0287946	0.0269494
100.312	20.1458	0.0488089	0.0623188	0.0924777	0.0582693	0.0595866	0.081811	0.0440531	0.0211198	0.0217834
100.312	20.1875	0.0428696	0.0563749	0.0878306	0.0521429	0.0469524	0.0664735	0.0321308	0.0172994	0.0164026
100.312	20.2292	0.0433738	0.0506871	0.0785941	0.0464659	0.0382491	0.0476482	0.0224097	0.0121202	0.0123624
100.312	20.2708	0.0402368	0.0474709	0.0716973	0.0422132	0.0376679	0.039526	0.0179864	0.0107656	0.0102429
100.312	20.3125	0.0324439	0.0439942	0.059061	0.0401971	0.0319395	0.0306026	0.0138706	0.00930136	0.00870143
100.312	20.3542	0.0304939	0.0376436	0.0510072	0.0351569	0.025955	0.0217089	0.0104643	0.00683717	0.00722091
100.312	20.3958	0.0315594	0.0346378	0.0426801	0.0301691	0.0228198	0.0158726	0.0069648	0.00521692	0.00586839
100.312	20.4375	0.032703	0.0351189	0.0425499	0.0267655	0.0200329	0.0143712	0.00633655	0.0043846	0.00470869
100.312	20.4792	0.0306905	0.0342688	0.0402963	0.0228841	0.0149973	0.0114383	0.00565234	0.00343147	0.00334686
100.312	20.5208	0.0308872	0.0314655	0.0367163	0.0187241	0.0120923	0.00968716	0.00523617	0.00310466	0.00310045
100.312	20.5625	0.030427	0.0288817	0.0332634	0.0172931	0.011965	0.00911332	0.00508093	0.00338807	0.00336612
100.312	20.6042	0.0258345	0.0249142	0.0251386	0.01638	0.0104087	0.00838486	0.00476269	0.00336969	0.00334553
100.312	20.6458	0.0223459	0.0218911	0.0200505	0.0147342	0.00865653	0.00778817	0.0041343	0.00337403	0.00352474
100.312	20.6875	0.0208168	0.0204361	0.0180473	0.0114636	0.00724906	0.00599902	0.00381109	0.00339812	0.00379627
100.312	20.7292	0.016675	0.0171858	0.0147412	0.00897768	0.00589941	0.00527522	0.0031888	0.00349942	0.00309938
100.312	20.7708	0.015565	0.0161471	0.0142871	0.00914067	0.00528896	0.00446675	0.00335008	0.00320415	0.00299013
100.312	6.6875	0.0163793	0.00832447	0.00665404	0.00995853	0.00666844	0.0061919	0.0103405	0.00863853	0.00671813
100.312	6.72917	0.0192047	0.00918758	0.00753384	0.0120999	0.00795592	0.00694522	0.0124378	0.00989627	0.00786581
100.312	6.77083	0.0189798	0.00843385	0.00713107	0.0116029	0.00644341	0.00665702	0.0119634	0.00912876	0.00674224
100.312	6.8125	0.0196772	0.00916109	0.00773561	0.0127337	0.00701946	0.00792468	0.0129665	0.0100521	0.00706652
100.312	6.85417	0.0198425	0.0102037	0.00743099	0.0123186	0.00705978	0.00764244	0.0128767	0.00976758	0.00645566
100.312	6.89583	0.0203985	0.0104092	0.00818168	0.0132156	0.00827096	0.00768093	0.0129985	0.00904485	0.00654878
100.312	6.9375	0.0274946	0.0148418	0.0109079	0.0178644	0.0111585	0.00964205	0.0156388	0.010457	0.00784867
100.312	6.97917	0.0273663	0.0151244	0.0111324	0.0172293	0.0105532	0.0103659	0.0141891	0.0102024	0.00696408
100.312	7.02083	0.0172376	0.00889228	0.00644214	0.0103106	0.00590065	0.00656159	0.00777914	0.00597059	0.00369616
100.312	7.0625	0.0200869	0.0112721	0.00852886	0.0110372	0.00786467	0.00767984	0.00891911	0.00654284	0.00409613
100.312	7.10417	0.028696	0.0158325	0.013362	0.0175446	0.011529	0.0113809	0.0124681	0.00933436	0.00612033
100.312	7.14583	0.0305592	0.0163485	0.0148601	0.016998	0.01179	0.0102054	0.0123282	0.00891767	0.00598716
100.312	7.1875	0.0345524	0.0174029	0.0165191	0.0194719	0.0118885	0.00985242	0.0123559	0.0088854	0.00688467
100.312	7.22917	0.0353101	0.0185722	0.0163797	0.0198508	0.012639	0.0093352	0.0117847	0.00822147	0.00680691
100.312	7.27083	0.0374662	0.0227011	0.01838	0.0238094	0.0124416	0.00930951	0.0121258	0.00919291	0.00717611
100.312	7.3125	0.0326467	0.019855	0.0155944	0.0213717	0.00977137	0.00632839	0.00901182	0.00660642	0.00556551
100.312	7.35417	0.0298411	0.0212013	0.0187096	0.0217235	0.00956501	0.00631445	0.00927777	0.00769117	0.00601543
100.312	7.39583	0.0326149	0.019085	0.0211054	0.022852	0.0106795	0.00735845	0.0103196	0.00765952	0.00612687
100.312	7.4375	0.0295597	0.0203819	0.0180741	0.022504	0.0100404	0.00764299	0.0114375	0.00756173	0.00540357
100.312	7.52083	0.0327686	0.0199025	0.0157148	0.0226375	0.0086137	0.00680112	0.0104694	0.00777218	0.00595952
100.312	7.5625	0.0327615	0.0210737	0.0158826	0.0202538	0.0101496	0.00736552	0.00987368	0.00752824	0.00588789
100.312	7.60417	0.0285762	0.0193751	0.0166275	0.0210275	0.0105207	0.007959	0.0101226	0.00831407	0.00632187
100.312	7.64583	0.0312711	0.0190758	0.0172693	0.0198317	0.0109834	0.00820497	0.0101815	0.00937838	0.00661665
100.312	7.6875	0.0320803	0.0186474	0.0183048	0.0184927	0.0103059	0.0091047	0.00956074	0.00855966	0.00691786
100.312	7.72917	0.0295989	0.0207284	0.0183515	0.0209967	0.0101333	0.00896773	0.00950646	0.00862036	0.00669218
100.312	7.77083	0.0271781	0.0187479	0.0176613	0.0182616	0.00906414	0.00784989	0.00815569	0.00847838	0.0070365
100.312	7.8125	0.0250851	0.0190688	0.0192653	0.018089	0.0093645	0.0082905	0.00847118	0.00840715	0.00765349
100.312	7.85417	0.0240566	0.0197986	0.020085	0.017867	0.00985175	0.0085004	0.00833173	0.0089162	0.00828352
100.312	7.89583	0.023222	0.0217166	0.021179	0.01897	0.00964269	0.00863761	0.00795939	0.00901234	0.00857656
100.312	7.9375	0.0258842	0.0220924	0.021945	0.0183887	0.00874603	0.00771935	0.00787455	0.00830692	0.00859377
100.312	7.97917	0.0301596	0.0306958	0.0278814	0.0221407	0.0109128	0.00951405	0.00947546	0.0093535	0.0119321
100.312	8.02083	0.0313935	0.0311619	0.0273383	0.0211957	0.0108315	0.0103806	0.00947131	0.00990688	0.0108663
100.312	8.0625	0.0262834	0.0245852	0.0269409	0.018593	0.00952168	0.00849827	0.00711162	0.00919179	0.00849096
100.354	13.5208	0.102778	0.0399528	0.0286571	0.11097	0.117521	0.018208	0.0040119	0.00405956	0.00419153
100.354	13.5625	0.0869772	0.0301687	0.0249499	0.0899589	0.107031	0.0143434	0.00301667	0.00322389	0.00309286
100.354	13.6042	0.0878606	0.0267536	0.019935	0.0924334	0.100902	0.0122382	0.00288	0.00320542	0.00288278
100.354	13.6458	0.0829654	0.0270821	0.0187868	0.0863171	0.0898066	0.0107129	0.00299475	0.00335154	0.00293811
100.354	13.6875	0.0779508	0.0228072	0.0176039	0.0831528	0.0702071	0.00910323	0.00243864	0.00313327	0.00268822
100.354	13.7292	0.0786801	0.0234888	0.0182171	0.0823154	0.0721933	0.00827096	0.00269697	0.00339997	0.00258107
100.354	13.7708	0.0823455	0.0242397	0.0192978	0.0837354	0.0674546	0.00801143	0.00274128	0.00342434	0.00230371
100.354	13.8125	0.0955359	0.0271069	0.0228734	0.0949554	0.077002	0.00854432	0.00351899	0.00408668	0.00248678
100.354	13.8542	0.159037	0.0464459	0.0407017	0.16296	0.132557	0.0192273	0.00718768	0.00791858	0.00426927
100.354	13.8958	0.182187	0.0567622	0.0527597	0.191972	0.159088	0.0233253	0.0100661	0.00944839	0.00477323
100.354	13.9375	0.155436	0.0515053	0.0532281	0.18436	0.168058	0.0276811	0.0122958	0.00936824	0.00431419
100.354	13.9792	0.155383	0.0582007	0.06057	0.200912	0.17031	0.0309906	0.0132043	0.0102268	0.00444467
100.354	14.0208	0.156409	0.0707429	0.0690931	0.20711	0.172068	0.0341119	0.01362	0.0104068	0.00453572
100.354	14.0625	0.120521	0.0538013	0.0545364	0.158528	0.124719	0.0256067	0.0105652	0.00693829	0.00337643
100.354	14.1042	0.115528	0.0556366	0.0515238	0.143689	0.113485	0.0254877	0.00936234	0.00586547	0.00274213
100.354	14.1458	0.1292	0.0707307	0.0652318	0.170482	0.128293	0.03123	0.0113982	0.00664103	0.00325666
100.354	14.1875	0.120608	0.0636316	0.0659496	0.152093	0.109839	0.0267662	0.0103015	0.00530878	0.0031927
100.354	14.2292	0.0933755	0.0536066	0.0548916	0.10699	0.0777859	0.0207655	0.00724184	0.00351698	0.00202523
100.354	14.2708	0.0952667	0.0524228	0.0532439	0.0967215	0.0729102	0.0213524	0.00783486	0.00367042	0.00193537
100.354	14.3125	0.0901193	0.0545511	0.0510737	0.0907273	0.0730153	0.0237784	0.00820187	0.00357093	0.00191335
100.354	14.3542	0.0846565	0.0583892	0.0556943	0.0910536	0.0686074	0.0246694	0.00888682	0.003334	0.00171433
100.354	14.3958	0.107715	0.0723906	0.0646984	0.104628	0.0808822	0.032672	0.0135692	0.00437425	0.0018906
100.354	14.4375	0.0990174	0.0709099	0.0642573	0.0960703	0.0786851	0.0360072	0.0153558	0.00506049	0.00199889
100.354	14.4792	0.0980401	0.0755527	0.0664863	0.100843	0.0818703	0.0441995	0.0205474	0.00624326	0.00249139
100.354	14.5208	0.10525	0.0731533	0.0696339	0.103168	0.0834215	0.0535157	0.0281148	0.0076274	0.00281791
100.354	14.5625	0.109554	0.0728139	0.0718867	0.117348	0.0930764	0.0631275	0.038438	0.00926456	0.00329509
100.354	14.6042	0.102044	0.0683473	0.065183	0.108406	0.0977358	0.0670152	0.0428351	0.0103741	0.00332787
100.354	14.6458	0.0934302	0.0594746	0.0574786	0.0947712	0.0888424	0.0593213	0.0380512	0.00927676	0.00293939
100.354	14.6875	0.0872833	0.0611473	0.0575286	0.0940759	0.0883516	0.0513546	0.0285599	0.00771219	0.0027536
100.354	14.7292	0.0886153	0.0610674	0.0578783	0.0936367	0.0850313	0.0476911	0.02247	0.00645446	0.00276173
100.354	14.7708	0.0865274	0.0616984	0.0590028	0.0983406	0.0860605	0.0437278	0.0173824	0.00561727	0.00277038
100.354	14.8125	0.111053	0.0783977	0.0720265	0.120902	0.112242	0.0512963	0.0176533	0.00635552	0.00352725
100.354	14.8542	0.112187	0.0784824	0.0699921	0.123278	0.116511	0.046797	0.0136732	0.0054459	0.00351158
100.354	14.8958	0.119389	0.0835354	0.0704992	0.129023	0.116398	0.0410217	0.0110764	0.00463058	0.00371902
100.354	14.9375	0.114428	0.0860412	0.0728742	0.143217	0.129212	0.04113	0.0120047	0.00503366	0.00390289
100.354	14.9792	0.108971	0.0830592	0.0754631	0.145347	0.132539	0.0445539	0.0151846	0.00552254	0.00387172
100.354	15.0208	0.0894869	0.0723002	0.0676092	0.147023	0.12239	0.0439424	0.0172158	0.00561851	0.00352921
100.354	15.0625	0.090003	0.0756868	0.0668012	0.155203	0.133414	0.0476101	0.0229039	0.00691963	0.00395664
100.354	15.1042	0.0927392	0.0841394	0.0856498	0.22004	0.181469	0.0606068	0.0323519	0.0102323	0.0058993
100.354	15.1458	0.0945196	0.0745237	0.0877471	0.240033	0.221759	0.0686688	0.0380072	0.0130583	0.00687406
100.354	15.1875	0.0953893	0.0741789	0.0877864	0.254647	0.231749	0.0747741	0.0440226	0.0161362	0.0082107
100.354	15.2292	0.0709589	0.0587252	0.0738636	0.220234	0.203514	0.0671647	0.0446019	0.0193591	0.00957777
100.354	15.2708	0.0572746	0.0519078	0.0669265	0.208135	0.200503	0.0683029	0.0487046	0.0233489	0.0131181
100.354	15.3125	0.0692503	0.0555392	0.0677725	0.253414	0.232123	0.0841459	0.0739268	0.0359405	0.021119
100.354	15.3542	0.0846197	0.0743464	0.0866968	0.32149	0.299499	0.119858	0.112232	0.0613556	0.0394401
100.354	15.3958	0.0845045	0.0777964	0.0889061	0.315674	0.304969	0.129121	0.127603	0.0738528	0.0472037
100.354	15.4375	0.0970165	0.0797715	0.0934901	0.323848	0.296389	0.123868	0.133736	0.0905053	0.0490634
100.354	15.4792	0.110726	0.089331	0.106621	0.353394	0.303278	0.14119	0.175245	0.139323	0.0891725
100.354	15.5208	0.13181	0.107664	0.12898	0.36242	0.347265	0.171082	0.208432	0.16474	0.125322
100.354	15.5625	0.178658	0.137455	0.134486	0.363199	0.353048	0.186995	0.205481	0.176759	0.118872
100.354	15.6042	0.239932	0.165242	0.15232	0.364807	0.349848	0.203615	0.206244	0.16883	0.123849
100.354	15.6458	0.331486	0.212003	0.196446	0.408375	0.401157	0.242619	0.254163	0.17429	0.13818
100.354	15.6875	0.386267	0.255311	0.214118	0.401626	0.392677	0.25281	0.23899	0.163918	0.134462
100.354	15.7292	0.460734	0.308819	0.241673	0.414176	0.387539	0.250283	0.22796	0.148875	0.125172
100.354	15.7708	0.577547	0.379496	0.277004	0.38814	0.369002	0.252272	0.216929	0.128737	0.104423
100.354	15.8125	0.615705	0.412133	0.273834	0.337321	0.290455	0.250962	0.182455	0.106437	0.0782192
100.354	15.8542	0.720338	0.47614	0.298237	0.32439	0.257046	0.24125	0.168647	0.0971916	0.0768514
100.354	15.8958	0.811311	0.559478	0.327806	0.283564	0.243086	0.236595	0.161125	0.0812959	0.0666919
100.354	15.9375	0.886586	0.672183	0.388432	0.338087	0.275954	0.272507	0.177334	0.0817323	0.0795408
100.354	15.9792	0.840002	0.58532	0.367568	0.283863	0.229499	0.263772	0.159129	0.0766647	0.0666183
100.354	16.0208	0.789848	0.513035	0.314633	0.229971	0.200332	0.254498	0.143086	0.0762484	0.0601407
100.354	16.0625	0.72583	0.439884	0.271963	0.186174	0.175572	0.249888	0.137304	0.0688438	0.0550909
100.354	16.1042	0.637724	0.356568	0.20457	0.14725	0.146089	0.233934	0.11215	0.0711825	0.0544538
100.354	16.1458	0.550548	0.28513	0.177555	0.113029	0.119179	0.21293	0.101797	0.061917	0.0550909
100.354	16.1875	0.449202	0.228001	0.135787	0.0871782	0.100306	0.193847	0.0888144	0.0563567	0.0534965
100.354	16.2292	0.349787	0.167405	0.101645	0.0633788	0.0776542	0.181185	0.0782072	0.0503512	0.0501288
100.354	16.2708	0.293936	0.133643	0.0906829	0.0545232	0.0661413	0.166796	0.0715064	0.0507062	0.0461912
100.354	16.3125	0.305517	0.145958	0.100403	0.0543833	0.0643394	0.166927	0.0718922	0.0480744	0.0525957
100.354	16.3542	0.320286	0.162291	0.108425	0.0563066	0.0589605	0.155589	0.0790821	0.0504965	0.0573521
100.354	16.3958	0.329646	0.176782	0.124334	0.0540332	0.0562709	0.161053	0.0775397	0.0504479	0.0544287
100.354	16.4375	0.294949	0.159463	0.112369	0.045428	0.0469803	0.129756	0.0616211	0.0405093	0.0466883
100.354	16.4792	0.300703	0.176687	0.134682	0.0464282	0.0486875	0.135983	0.0682411	0.0464747	0.0561006
100.354	16.5208	0.333077	0.199562	0.171774	0.060102	0.0582542	0.168585	0.0846642	0.064667	0.073846
100.354	16.5625	0.328968	0.205967	0.187575	0.0729529	0.0628587	0.171172	0.0978635	0.0768608	0.0897537
100.354	16.6042	0.242132	0.171243	0.17406	0.0777288	0.0727502	0.186355	0.100675	0.074413	0.0868779
100.354	16.6458	0.161199	0.128662	0.163868	0.0826589	0.0854269	0.19779	0.0934209	0.0704755	0.077195
100.354	16.6875	0.099244	0.0944062	0.152479	0.0821123	0.0930223	0.194393	0.0933762	0.0704746	0.0699713
100.354	16.7292	0.0602013	0.0689875	0.13397	0.0868481	0.0943682	0.195102	0.0890624	0.0630074	0.0566339
100.354	16.7708	0.0359294	0.0479305	0.111153	0.0852458	0.0953013	0.191615	0.0834616	0.0542355	0.049542
100.354	16.8125	0.020398	0.0313731	0.0914254	0.0752121	0.0891412	0.193073	0.0867421	0.0511706	0.0398677
100.354	16.8542	0.0133098	0.0233923	0.0809953	0.0703461	0.0920447	0.17593	0.0757256	0.0370593	0.0305017
100.354	16.8958	0.0265711	0.0431248	0.128454	0.0995661	0.117949	0.225706	0.0904024	0.0408626	0.0305384
100.354	16.9375	0.0527817	0.0763114	0.196185	0.136518	0.14545	0.265672	0.0997498	0.0402939	0.0290407
100.354	16.9792	0.0997286	0.126496	0.275293	0.174829	0.171171	0.286778	0.0985568	0.038848	0.0273829
100.354	17.0208	0.187089	0.221243	0.39222	0.246012	0.210088	0.317033	0.111513	0.0361762	0.0251138
100.354	17.0625	0.314273	0.357333	0.490326	0.283244	0.252761	0.329792	0.106595	0.031658	0.0230578
100.354	17.1042	0.488838	0.519597	0.589216	0.355317	0.311284	0.370802	0.108727	0.0309895	0.0205592
100.354	17.1458	0.519846	0.562933	0.636734	0.393051	0.321835	0.391721	0.124105	0.0354327	0.0194269
100.354	17.1875	0.458382	0.522688	0.609252	0.39312	0.32106	0.405824	0.127586	0.0345775	0.0201695
100.354	17.2292	0.221749	0.304804	0.495866	0.322694	0.29199	0.37865	0.122482	0.0304063	0.0183125
100.354	17.2708	0.0740016	0.1246	0.318486	0.221948	0.227158	0.320848	0.0832807	0.0228625	0.0135707
100.354	17.3125	0.0269663	0.0561817	0.216238	0.166538	0.191982	0.289899	0.0828151	0.0211551	0.0131814
100.354	17.3542	0.0113987	0.027433	0.138012	0.111574	0.154994	0.25316	0.0675324	0.0167694	0.010076
100.354	17.3958	0.00926092	0.0226382	0.105145	0.0824775	0.122849	0.201343	0.0541012	0.0116225	0.00642472
100.354	17.4375	0.009782	0.0207969	0.0967882	0.0778127	0.113613	0.182006	0.0481375	0.010183	0.00510627
100.354	17.4792	0.0180825	0.0388416	0.147722	0.130626	0.162432	0.261237	0.0819456	0.016715	0.00814975
100.354	17.5208	0.0142442	0.0268586	0.098979	0.0878058	0.112628	0.185045	0.0572977	0.0116563	0.00514145
100.354	17.5625	0.0210585	0.0370696	0.125329	0.111475	0.141667	0.228394	0.0698592	0.0161311	0.00702598
100.354	17.6042	0.0186057	0.0346542	0.10236	0.0901353	0.111188	0.198517	0.0634786	0.0136632	0.00593078
100.354	17.6458	0.0159161	0.0277407	0.0793924	0.0635442	0.0818349	0.144458	0.0432919	0.0088434	0.00442645
100.354	17.6875	0.042838	0.0701899	0.171012	0.135387	0.172256	0.279402	0.0986906	0.0207248	0.0104216
100.354	17.7292	0.0363158	0.0696698	0.159275	0.104154	0.136043	0.245016	0.0840726	0.01572	0.00817608
100.354	17.7708	0.0445849	0.0851121	0.176869	0.11716	0.155317	0.283914	0.0944718	0.018036	0.00907172
100.354	17.8125	0.0556536	0.10047	0.201001	0.130341	0.180399	0.338598	0.106701	0.0223386	0.0125846
100.354	17.8542	0.0398146	0.0737813	0.148768	0.096716	0.135126	0.27568	0.0813411	0.0196122	0.00991873
100.354	17.8958	0.047293	0.08202	0.143514	0.0950239	0.141533	0.255367	0.084929	0.0239288	0.0116298
100.354	17.9375	0.0563155	0.0826263	0.16399	0.0932085	0.142026	0.233148	0.0873062	0.0262547	0.0141006
100.354	17.9792	0.0587462	0.087695	0.170168	0.0975975	0.14155	0.260613	0.0865431	0.0282933	0.0156299
100.354	18.0208	0.0646811	0.0984036	0.188561	0.122329	0.150853	0.268728	0.0971105	0.0320695	0.0216588
100.354	18.0625	0.0687602	0.116102	0.190419	0.14024	0.162587	0.266401	0.120737	0.0385594	0.0252309
100.354	18.1042	0.0732108	0.126167	0.204356	0.143397	0.166112	0.276113	0.121906	0.0434439	0.0284514
100.354	18.1458	0.0767578	0.13041	0.214469	0.151286	0.179318	0.284843	0.133076	0.048824	0.0344129
100.354	18.1875	0.0843386	0.134825	0.223416	0.161773	0.178211	0.299623	0.139892	0.0595519	0.0430346
100.354	18.2292	0.0867821	0.146912	0.236575	0.170674	0.17291	0.269254	0.127797	0.0635284	0.0545066
100.354	18.2708	0.083869	0.155973	0.230308	0.159439	0.170249	0.271239	0.12444	0.0705229	0.0650477
100.354	18.3125	0.0836974	0.143438	0.249122	0.155137	0.179404	0.273257	0.12579	0.0837697	0.0724175
100.354	18.3542	0.0780565	0.12922	0.232653	0.143749	0.177283	0.280827	0.134188	0.0912505	0.0836358
100.354	18.3958	0.0869766	0.130303	0.238235	0.16218	0.186435	0.310302	0.142866	0.0998033	0.0996151
100.354	18.4375	0.0955055	0.129854	0.24858	0.169434	0.20196	0.337509	0.143336	0.111801	0.110613
100.354	18.4792	0.0908804	0.138236	0.244723	0.171462	0.218046	0.364276	0.15762	0.121261	0.126271
100.354	18.5208	0.0983732	0.13648	0.25623	0.179965	0.240164	0.346785	0.167417	0.120963	0.138816
100.354	18.5625	0.0946361	0.119424	0.26679	0.183865	0.244355	0.346115	0.162953	0.117542	0.158233
100.354	18.6042	0.0940995	0.12705	0.264891	0.166605	0.237144	0.384466	0.163782	0.139482	0.155463
100.354	18.6458	0.0922459	0.139473	0.25905	0.193745	0.255167	0.407993	0.190264	0.139034	0.17117
100.354	18.6875	0.102646	0.132964	0.258504	0.181582	0.241024	0.437049	0.206453	0.145955	0.175493
100.354	18.7292	0.0895145	0.130655	0.244406	0.169299	0.237898	0.438714	0.191165	0.162059	0.1906
100.354	18.7708	0.0885021	0.134864	0.25476	0.163539	0.23405	0.432477	0.189574	0.140683	0.194733
100.354	18.8125	0.0881895	0.139139	0.263245	0.166685	0.233418	0.404868	0.201432	0.139718	0.193757
100.354	18.8542	0.0914605	0.131288	0.256465	0.143639	0.206601	0.394308	0.188735	0.143282	0.185281
100.354	18.8958	0.0955663	0.130296	0.241189	0.13289	0.186852	0.366104	0.169928	0.136295	0.158125
100.354	18.9375	0.0972632	0.125338	0.222257	0.126367	0.179698	0.345883	0.161846	0.135566	0.15039
100.354	18.9792	0.0915369	0.133025	0.217575	0.116753	0.17	0.345051	0.153477	0.14164	0.154901
100.354	19.0208	0.083255	0.130601	0.205885	0.117496	0.158612	0.325342	0.152316	0.139777	0.167664
100.354	19.0625	0.0829142	0.11637	0.205921	0.100386	0.144035	0.301589	0.147212	0.135751	0.164435
100.354	19.1042	0.0750052	0.113629	0.201037	0.100012	0.132221	0.31279	0.147597	0.125296	0.163887
100.354	19.1458	0.0731895	0.109185	0.198357	0.103571	0.143966	0.310514	0.149131	0.131617	0.156669
100.354	19.1875	0.0688013	0.11151	0.18489	0.100743	0.13136	0.309413	0.147874	0.12812	0.149575
100.354	19.2292	0.0702608	0.111114	0.176595	0.0954371	0.124089	0.283998	0.146943	0.124846	0.130787
100.354	19.2708	0.0720323	0.096945	0.17569	0.0890025	0.105131	0.259549	0.134693	0.124897	0.113498
100.354	19.3125	0.073388	0.100067	0.178792	0.0949971	0.11133	0.276161	0.140718	0.13023	0.12697
100.354	19.3542	0.0810487	0.100591	0.176712	0.0888577	0.108492	0.261396	0.128387	0.124084	0.135188
100.354	19.3958	0.0772569	0.0847009	0.169937	0.0900535	0.114164	0.243909	0.133131	0.125354	0.133894
100.354	19.4375	0.0731589	0.0928844	0.167394	0.0842798	0.112945	0.24513	0.13604	0.128969	0.137874
100.354	19.4792	0.0735806	0.0940248	0.166423	0.0816315	0.112133	0.229754	0.143713	0.134551	0.137579
100.354	19.5208	0.0631978	0.0837791	0.169712	0.0878746	0.111667	0.239181	0.127418	0.115612	0.119192
100.354	19.5625	0.0707277	0.0917029	0.154984	0.0963607	0.124507	0.247848	0.132892	0.113627	0.128072
100.354	19.6042	0.0903092	0.106237	0.167987	0.10699	0.14601	0.26332	0.14233	0.11953	0.12979
100.354	19.6458	0.0804255	0.107635	0.178078	0.104323	0.147702	0.259038	0.142058	0.116873	0.121351
100.354	19.6875	0.0868611	0.107408	0.179395	0.110077	0.152874	0.264776	0.145899	0.117926	0.11661
100.354	19.7292	0.0826179	0.107725	0.176787	0.120925	0.155254	0.26531	0.166177	0.1063	0.115982
100.354	19.7708	0.0764387	0.107204	0.177042	0.128616	0.159199	0.245302	0.14953	0.108247	0.104613
100.354	19.8125	0.0672521	0.0998065	0.166403	0.116667	0.147238	0.224837	0.12349	0.0816543	0.0866781
100.354	19.8542	0.0741077	0.0930993	0.164655	0.10487	0.129777	0.206024	0.109184	0.0689053	0.0720901
100.354	19.8958	0.0628381	0.0894395	0.145207	0.098728	0.115949	0.188066	0.0903115	0.0564389	0.0576595
100.354	19.9375	0.0613129	0.0897889	0.146408	0.0945461	0.098629	0.169323	0.0709617	0.0468537	0.047088
100.354	19.9792	0.0598174	0.0862265	0.130882	0.097091	0.0870169	0.139039	0.0615912	0.0372138	0.0381024
100.354	20.0208	0.0582959	0.0787214	0.123327	0.0769406	0.070987	0.120874	0.0566093	0.029713	0.0324169
100.354	20.0625	0.0516928	0.0733483	0.098477	0.067469	0.0612572	0.0859966	0.0434692	0.0240515	0.0238527
100.354	20.1042	0.049859	0.0711063	0.0899801	0.0583411	0.0543566	0.0747473	0.0356387	0.0194321	0.0195266
100.354	20.1458	0.0415505	0.0505967	0.0799472	0.0459824	0.042017	0.0549069	0.0278739	0.0151784	0.0148549
100.354	20.1875	0.0394561	0.0485881	0.0752008	0.0471915	0.0395239	0.05378	0.0217888	0.0126526	0.0119639
100.354	20.2292	0.0360087	0.042329	0.0684422	0.0415256	0.033889	0.0380726	0.0169075	0.00978272	0.0100098
100.354	20.2708	0.0326409	0.0401831	0.0628749	0.0359529	0.0293703	0.0309021	0.0124137	0.00832702	0.00723832
100.354	20.3125	0.0307015	0.0376261	0.0507301	0.0316546	0.0243849	0.021651	0.0097578	0.00634859	0.00634747
100.354	20.3542	0.02907	0.0363801	0.0452064	0.0271686	0.0208668	0.0154115	0.00687222	0.00467507	0.00530111
100.354	20.3958	0.0303823	0.031596	0.0412288	0.0262885	0.0172911	0.0130116	0.00566876	0.00395599	0.00432143
100.354	20.4375	0.0283923	0.0290471	0.0388818	0.0235125	0.015466	0.0112319	0.00479732	0.00341071	0.0034703
100.354	20.4792	0.0314829	0.0312891	0.0360287	0.0198189	0.0129672	0.0090687	0.00424116	0.00265034	0.00260759
100.354	20.5208	0.03224	0.0274283	0.0308137	0.0171133	0.010143	0.00768416	0.00375718	0.00248187	0.00236608
100.354	20.5625	0.02753	0.0268895	0.0275989	0.0160822	0.0106588	0.0074368	0.00389865	0.00270706	0.00285165
100.354	20.6042	0.0230609	0.0243294	0.022139	0.0138242	0.00812963	0.00696893	0.00359667	0.00269138	0.00281474
100.354	20.6458	0.0209629	0.020654	0.0199846	0.0117457	0.00684958	0.00551071	0.00311327	0.00265091	0.00316109
100.354	20.6875	0.0180307	0.0206861	0.0157397	0.00963756	0.00625187	0.00459475	0.00286682	0.00280286	0.00308851
100.354	20.7292	0.0154417	0.01582	0.013097	0.00814973	0.0048088	0.00420647	0.00272032	0.00265401	0.0026973
100.354	20.7708	0.0148602	0.0152384	0.0127659	0.00836771	0.00452191	0.00374407	0.00300262	0.00294861	0.00288674
100.354	6.5625	0.0155498	0.00896885	0.00752964	0.0110942	0.00822007	0.0107551	0.0140249	0.0116459	0.00787059
100.354	6.60417	0.016868	0.00864223	0.0074196	0.0105288	0.00814142	0.00973099	0.0153471	0.0107261	0.00760722
100.354	6.64583	0.0143349	0.00777854	0.0066277	0.0104199	0.00722147	0.00830497	0.0127359	0.00949884	0.00672941
100.354	6.6875	0.0161137	0.00808744	0.00591022	0.00975799	0.00694852	0.00767825	0.011879	0.00932774	0.00657744
100.354	6.72917	0.0201789	0.00918578	0.00734141	0.0129328	0.00810577	0.00860499	0.0152319	0.0112444	0.00787636
100.354	6.77083	0.0222511	0.00822771	0.00709451	0.01261	0.00714426	0.0087368	0.0141841	0.010738	0.00745837
100.354	6.8125	0.0195092	0.00798867	0.00717966	0.011349	0.00654793	0.00847186	0.0137646	0.0101544	0.00703128
100.354	6.85417	0.0204142	0.0101326	0.0077699	0.0128	0.00776007	0.0089254	0.0144167	0.0103408	0.00735833
100.354	6.89583	0.0224876	0.0107041	0.00813061	0.0134747	0.00890979	0.00850972	0.0146414	0.0101543	0.00669243
100.354	6.9375	0.0278954	0.0133155	0.00983709	0.016943	0.011366	0.0107377	0.0176254	0.0119911	0.00753882
100.354	6.97917	0.0287976	0.0153138	0.0102045	0.0158037	0.0112857	0.0111067	0.0156522	0.0110426	0.00699432
100.354	7.02083	0.0217318	0.0114054	0.00801581	0.010807	0.00784603	0.00820827	0.0112745	0.00763264	0.00460026
100.354	7.0625	0.0210394	0.0101496	0.00822707	0.0105688	0.00793953	0.00900241	0.0104937	0.00714969	0.00412986
100.354	7.10417	0.0222487	0.0102225	0.0100488	0.01188	0.00926951	0.00885275	0.0105978	0.0072993	0.00487669
100.354	7.14583	0.0250048	0.0117704	0.0109784	0.013131	0.0100879	0.00974786	0.0114842	0.00792809	0.00559624
100.354	7.1875	0.0283421	0.0155705	0.0141849	0.0168045	0.0119586	0.0101982	0.0131924	0.00823448	0.00717481
100.354	7.22917	0.0359289	0.0190544	0.0180431	0.0217318	0.014774	0.0110099	0.0137782	0.00962557	0.008497
100.354	7.27083	0.0366002	0.0234515	0.0192314	0.0252573	0.0142118	0.0107312	0.0141411	0.00998152	0.00815405
100.354	7.3125	0.03056	0.0176284	0.0165361	0.0221792	0.0109298	0.00700744	0.010042	0.00766505	0.00606773
100.354	7.35417	0.0261138	0.0176275	0.0166031	0.0221039	0.0105272	0.0067062	0.00961029	0.00793561	0.00584815
100.354	7.39583	0.0257737	0.0173927	0.0171976	0.0210539	0.0111129	0.00718225	0.0101433	0.00807321	0.00602989
100.354	7.4375	0.0289012	0.0174932	0.0165938	0.0184356	0.0101091	0.00733038	0.0112308	0.00738546	0.00594548
100.354	7.47917	0.0275675	0.0197786	0.0167346	0.0201257	0.00910474	0.00791268	0.012319	0.00738222	0.00592828
100.354	7.52083	0.0315632	0.0220455	0.0176441	0.0233397	0.0107767	0.00870088	0.0133768	0.0084806	0.00627481
100.354	7.5625	0.0316041	0.0185452	0.0160343	0.022268	0.010616	0.00801486	0.010557	0.00752716	0.00625483
100.354	7.60417	0.0244351	0.0177569	0.0141494	0.0176739	0.0109912	0.00861856	0.0103036	0.00840361	0.0055662
100.354	7.64583	0.0325811	0.0218017	0.0200638	0.0243335	0.0127594	0.0108766	0.0136402	0.0114086	0.00848781
100.354	7.6875	0.0271947	0.0169242	0.015742	0.0191936	0.00980187	0.00852208	0.0103547	0.00933379	0.00664379
100.354	7.72917	0.0245039	0.014661	0.0154295	0.0172053	0.00891518	0.00747783	0.00863077	0.00791416	0.00633376
100.354	7.77083	0.0212409	0.0149617	0.0151262	0.0145871	0.00797917	0.00688991	0.00733367	0.00788878	0.00637689
100.354	7.8125	0.0203725	0.0155712	0.016058	0.0148192	0.00829757	0.00770863	0.00753179	0.00854223	0.00678701
100.396	13.5208	0.114315	0.0370382	0.0313266	0.11793	0.130453	0.0186376	0.00412101	0.00389267	0.00408325
100.396	13.5625	0.0998309	0.033987	0.0277876	0.101177	0.12015	0.017232	0.00370258	0.00360222	0.00355606
100.396	13.6042	0.0996407	0.030511	0.0232006	0.109274	0.11304	0.0160537	0.00377152	0.0038445	0.00337967
100.396	13.6458	0.0760477	0.0222884	0.0160618	0.0842633	0.0845931	0.0119684	0.00295291	0.00332396	0.00274289
100.396	13.6875	0.0802805	0.0213579	0.0166281	0.0852788	0.0888567	0.011707	0.00333012	0.0035474	0.0028479
100.396	13.7292	0.0814567	0.0220751	0.0169004	0.0862211	0.0962513	0.0123314	0.00356676	0.00389524	0.00272177
100.396	13.7708	0.085666	0.0240908	0.0177994	0.0885124	0.0922821	0.011184	0.00416221	0.00409635	0.00282545
100.396	13.8125	0.0994958	0.0272646	0.0218458	0.104484	0.103496	0.0130385	0.00532921	0.00509266	0.00280143
100.396	13.8542	0.120727	0.0339064	0.0278231	0.140998	0.130467	0.0187707	0.00768848	0.00720037	0.00360915
100.396	13.8958	0.14633	0.0423353	0.037774	0.172452	0.158624	0.0248866	0.0110798	0.00891577	0.00401268
100.396	13.9375	0.146212	0.0450129	0.0448089	0.180334	0.156967	0.0267291	0.0125692	0.00903995	0.00364137
100.396	13.9792	0.177604	0.0608464	0.0580127	0.208291	0.175029	0.0326577	0.0145415	0.00986958	0.00445345
100.396	14.0208	0.170611	0.0676686	0.0654767	0.202298	0.173195	0.0337756	0.0137516	0.00917987	0.00445718
100.396	14.0625	0.159055	0.0666293	0.0683815	0.190299	0.161994	0.0331668	0.0129066	0.00846026	0.00398788
100.396	14.1042	0.145252	0.0662435	0.0635508	0.17764	0.135617	0.0317768	0.0114556	0.00677573	0.00341834
100.396	14.1458	0.105334	0.0493388	0.0461537	0.13126	0.100713	0.022886	0.00779994	0.00472533	0.00240149
100.396	14.1875	0.0993975	0.0519234	0.0478189	0.118789	0.0886028	0.0225259	0.00756097	0.00406155	0.00232544
100.396	14.2292	0.0960335	0.0515852	0.0547327	0.109315	0.0758723	0.0210188	0.0071919	0.00370176	0.00219421
100.396	14.2708	0.121745	0.0660383	0.0691627	0.130196	0.0839133	0.0265637	0.00889133	0.00449166	0.002421
100.396	14.3125	0.114856	0.0690095	0.0647528	0.122082	0.0831214	0.0291691	0.00991069	0.0044256	0.00232693
100.396	14.3542	0.0871163	0.0558328	0.0510231	0.0926403	0.0657294	0.022649	0.00849461	0.00315411	0.00173079
100.396	14.3958	0.10543	0.0702164	0.0665688	0.106867	0.0784636	0.0315506	0.0121243	0.00411125	0.001992
100.396	14.4375	0.103926	0.065575	0.0604164	0.107346	0.079827	0.0341079	0.0128286	0.00467651	0.00225213
100.396	14.4792	0.0986462	0.066041	0.0617171	0.111064	0.0790644	0.0372504	0.0165917	0.00553262	0.00242276
100.396	14.5208	0.10668	0.0708753	0.0675758	0.117367	0.0852781	0.0473519	0.0238138	0.00725535	0.00301622
100.396	14.5625	0.0887482	0.0573483	0.054419	0.0909131	0.074105	0.0443208	0.0245423	0.00693417	0.00262077
100.396	14.6042	0.0875924	0.0550094	0.0505499	0.0861367	0.0743784	0.0502021	0.0295527	0.00793326	0.00262545
100.396	14.6458	0.106046	0.0760508	0.0671036	0.115911	0.100263	0.0683208	0.0439198	0.0113302	0.00388443
100.396	14.6875	0.0840718	0.0606492	0.0528944	0.0907397	0.0806709	0.0531168	0.0301086	0.00815332	0.00327782
100.396	14.7292	0.111582	0.080297	0.0721132	0.118809	0.105538	0.0592472	0.0312767	0.00953193	0.00434541
100.396	14.7708	0.103408	0.0739994	0.0684779	0.11808	0.107646	0.052165	0.0239841	0.00810635	0.00407613
100.396	14.8125	0.0846475	0.0596098	0.0536834	0.0966459	0.0830788	0.0385837	0.0149807	0.00545577	0.00324094
100.396	14.8542	0.0835166	0.0595155	0.0524134	0.0934786	0.0836738	0.0328743	0.0115802	0.00444919	0.00316221
100.396	14.8958	0.0983087	0.0697565	0.0608285	0.115538	0.0987827	0.0385455	0.0123654	0.00515699	0.00399968
100.396	14.9375	0.0995536	0.0732075	0.0661115	0.131084	0.106995	0.0414337	0.0134552	0.00563154	0.00431235
100.396	14.9792	0.106179	0.0871725	0.0814827	0.169142	0.151059	0.0528847	0.0183707	0.00770328	0.00526504
100.396	15.0208	0.106038	0.0854975	0.079355	0.182218	0.146227	0.0585335	0.0246123	0.00926596	0.00560031
100.396	15.0625	0.103855	0.08634	0.0859445	0.199117	0.161105	0.0613976	0.0312988	0.0113424	0.0062685
100.396	15.1042	0.104083	0.0851042	0.0877725	0.24789	0.201353	0.0679825	0.0392579	0.0147287	0.0082379
100.396	15.1458	0.0850876	0.0682165	0.0734411	0.22874	0.186535	0.0649262	0.0373932	0.0157633	0.00882505
100.396	15.1875	0.0708297	0.0568111	0.0726238	0.225427	0.187247	0.0624718	0.0414568	0.0186535	0.008773
100.396	15.2292	0.0703407	0.0590084	0.0749678	0.233269	0.208051	0.0703049	0.0494104	0.0229708	0.0109463
100.396	15.2708	0.0758712	0.0630076	0.0810976	0.243264	0.220854	0.0781636	0.068554	0.0319924	0.0191511
100.396	15.3125	0.0478754	0.0363265	0.0474265	0.176165	0.164416	0.058672	0.0497251	0.0251104	0.0162089
100.396	15.3542	0.0821392	0.0665924	0.088142	0.316408	0.285092	0.120809	0.113932	0.0656197	0.0443894
100.396	15.3958	0.0907255	0.0682057	0.0828251	0.307235	0.27848	0.127929	0.121128	0.0757909	0.047106
100.396	15.4375	0.0826461	0.0725402	0.0832299	0.283099	0.258351	0.107206	0.113572	0.0867256	0.0497002
100.396	15.4792	0.100356	0.0858695	0.103576	0.308653	0.294807	0.143046	0.157692	0.107352	0.0748351
100.396	15.5208	0.125724	0.102707	0.123135	0.32581	0.327473	0.173531	0.192531	0.139277	0.108493
100.396	15.5625	0.18083	0.138733	0.148821	0.345936	0.320255	0.184091	0.196652	0.136967	0.105422
100.396	15.6042	0.239104	0.159848	0.16513	0.353428	0.333875	0.186348	0.186916	0.145411	0.0986699
100.396	15.6458	0.314212	0.207376	0.206736	0.393456	0.375794	0.228445	0.210742	0.1455	0.113557
100.396	15.6875	0.358258	0.249178	0.234319	0.397909	0.38769	0.244591	0.234119	0.14953	0.120406
100.396	15.7292	0.396068	0.258683	0.212268	0.338188	0.326383	0.228137	0.198451	0.121096	0.0922367
100.396	15.7708	0.522571	0.321873	0.225498	0.344191	0.295863	0.24435	0.180982	0.107378	0.0822185
100.396	15.8125	0.601846	0.393366	0.266413	0.318903	0.284123	0.248343	0.171219	0.0992959	0.0706892
100.396	15.8542	0.713081	0.435337	0.285527	0.29543	0.263019	0.233889	0.166512	0.0862443	0.0687385
100.396	15.8958	0.795562	0.531703	0.299965	0.289738	0.257996	0.255053	0.153432	0.0741924	0.0632264
100.396	15.9375	0.843948	0.579355	0.32622	0.277763	0.242971	0.270286	0.170948	0.0723485	0.0625991
100.396	15.9792	0.81455	0.541774	0.278482	0.238876	0.197621	0.23592	0.154605	0.0700648	0.0500413
100.396	16.0208	0.725011	0.434599	0.233369	0.166909	0.147214	0.208413	0.116494	0.0562002	0.0402216
100.396	16.0625	0.690974	0.406691	0.247628	0.165356	0.159858	0.238662	0.127982	0.0643391	0.046662
100.396	16.1042	0.617957	0.346718	0.209741	0.136359	0.137519	0.231551	0.120968	0.0642483	0.0500786
100.396	16.1458	0.529946	0.28295	0.174445	0.107516	0.11518	0.223652	0.109211	0.0618966	0.0508019
100.396	16.1875	0.428358	0.212542	0.13408	0.0866986	0.0938148	0.199358	0.0942277	0.0525269	0.0475859
100.396	16.2292	0.288498	0.133034	0.0882852	0.0538312	0.0628093	0.148062	0.0656003	0.0385026	0.0355972
100.396	16.2708	0.28847	0.139896	0.0956471	0.053342	0.0638173	0.157861	0.0721399	0.0467717	0.0463669
100.396	16.3125	0.270007	0.130027	0.0892908	0.0465187	0.0540841	0.14082	0.0661576	0.0457499	0.0497694
100.396	16.3542	0.274126	0.13917	0.0978482	0.0480129	0.0490507	0.131445	0.0709951	0.0444338	0.0517497
100.396	16.3958	0.283437	0.150971	0.106464	0.0478581	0.046448	0.129548	0.0675955	0.0434413	0.0490274
100.396	16.4375	0.273002	0.151026	0.112598	0.043163	0.0423789	0.126721	0.0604478	0.0403163	0.0485221
100.396	16.4792	0.252192	0.146177	0.117618	0.0421943	0.0419596	0.120036	0.0635101	0.0430585	0.0508029
100.396	16.5208	0.273785	0.162	0.137444	0.0536727	0.052006	0.138829	0.0814809	0.0642404	0.0686402
100.396	16.5625	0.266899	0.171073	0.148197	0.059552	0.0565019	0.138627	0.0849375	0.0771319	0.0906964
100.396	16.6042	0.210926	0.15343	0.149869	0.0654203	0.0612282	0.145247	0.0875606	0.0767812	0.0866256
100.396	16.6458	0.13557	0.116565	0.135494	0.0640245	0.0643953	0.154442	0.0831284	0.0675525	0.0766655
100.396	16.6875	0.0823827	0.0823959	0.135288	0.0646644	0.071591	0.152573	0.0798552	0.0586548	0.0632729
100.396	16.7292	0.052266	0.0601599	0.116937	0.065366	0.0794494	0.162495	0.0840448	0.0568833	0.0581299
[truncated: 58,966 more rows]
