# Supplementary material for: Model-based spatial-temporal mapping of opisthorchiasis in endemic countries of Southeast Asia
Source: eLife. 2021 Jan 12;10:e59755. doi: 10.7554/eLife.59755 (PMC7870142; doi:10.7554/eLife.59755)
Supplement: Figure 4—source data 1. [file elife-59755-fig4-data1.xlsx]

## Sheet: SD of estimated error
Longitude	Latitude	SD of 1978	SD of 1983	SD of 1988	SD of 1993	SD of 1998	SD of 2003	SD of 2008	SD of 2013	SD of 2018
100.021	12.8958	0.29406	0.274406	0.276097	0.2897	0.278836	0.212704	0.144348	0.13669	0.163724
100.021	12.9375	0.296804	0.278254	0.280235	0.290044	0.279976	0.21491	0.138508	0.127724	0.163894
100.021	12.9792	0.284777	0.265755	0.267957	0.273479	0.268537	0.198812	0.11506	0.0998	0.145156
100.021	13.0208	0.272031	0.253413	0.254422	0.260075	0.261906	0.185912	0.0941209	0.079439	0.130339
100.021	13.0625	0.268593	0.248025	0.245897	0.256575	0.263396	0.183475	0.0890676	0.066426	0.121646
100.021	13.1042	0.262982	0.23983	0.234447	0.252545	0.263358	0.178486	0.083317	0.0585554	0.11641
100.021	13.1458	0.268505	0.241612	0.23407	0.259672	0.272548	0.186637	0.0898188	0.068012	0.126632
100.021	13.3958	0.156795	0.118783	0.119948	0.155726	0.178425	0.0505238	0.0129151	0.0107585	0.0333571
100.021	13.4375	0.149253	0.108259	0.109589	0.148913	0.172206	0.0447038	0.0116495	0.0108829	0.0310868
100.021	13.4792	0.157784	0.109163	0.106597	0.156248	0.173541	0.0478337	0.0133153	0.0146345	0.0358788
100.021	13.5208	0.191871	0.14288	0.133859	0.189429	0.195819	0.0682551	0.023425	0.029655	0.0590779
100.021	13.5625	0.245523	0.20056	0.192966	0.244613	0.240778	0.114278	0.0498351	0.0583063	0.102444
100.021	13.6042	0.273208	0.229494	0.22567	0.274435	0.266433	0.145084	0.0735331	0.0847376	0.140717
100.021	13.6458	0.269309	0.227503	0.221562	0.273493	0.264139	0.13859	0.0710412	0.0837762	0.136681
100.021	13.6875	0.233755	0.187737	0.177157	0.23766	0.230582	0.0950356	0.0387093	0.0578243	0.0939195
100.021	13.7292	0.219352	0.167531	0.158467	0.220977	0.216562	0.0815553	0.0300038	0.0438742	0.0736684
100.021	13.7708	0.214283	0.15776	0.152954	0.213437	0.211396	0.0808168	0.0319244	0.0406817	0.062374
100.021	13.8125	0.195671	0.145024	0.143283	0.198168	0.195352	0.0755006	0.0254517	0.0296201	0.0499733
100.021	13.8542	0.207059	0.16295	0.161387	0.208763	0.207654	0.086169	0.0275814	0.0299905	0.0558894
100.021	13.8958	0.213934	0.17427	0.172647	0.216757	0.218044	0.0947154	0.0305065	0.0333928	0.0601527
100.021	13.9375	0.230558	0.190778	0.189703	0.232154	0.233202	0.114239	0.0411953	0.0437481	0.0707053
100.021	13.9792	0.247901	0.20653	0.209365	0.252265	0.252528	0.142458	0.0613671	0.0580369	0.082022
100.021	14.0208	0.233674	0.190533	0.198721	0.248297	0.247732	0.13602	0.0671106	0.0546769	0.0717553
100.021	14.0625	0.230331	0.188177	0.19814	0.250298	0.249263	0.143469	0.083919	0.0641118	0.0728255
100.021	14.1042	0.251919	0.217319	0.223209	0.271295	0.270015	0.176776	0.125142	0.0925963	0.0971697
100.021	14.1458	0.272799	0.244149	0.247026	0.290032	0.286312	0.210647	0.168668	0.120746	0.1224
100.021	14.1875	0.271935	0.24479	0.248424	0.28858	0.281744	0.214965	0.17722	0.122033	0.121304
100.021	14.2292	0.245021	0.214651	0.217657	0.26052	0.250274	0.184056	0.150414	0.095325	0.0916576
100.021	14.2708	0.222922	0.189438	0.191522	0.235058	0.222252	0.162829	0.133915	0.0751302	0.0683423
100.021	14.3125	0.207431	0.173994	0.176088	0.216381	0.202915	0.154108	0.130808	0.0616616	0.0509758
100.021	14.3542	0.203209	0.171076	0.173263	0.209468	0.198227	0.159954	0.140138	0.0604224	0.0421611
100.021	14.3958	0.211379	0.178577	0.179912	0.213732	0.205851	0.174601	0.158604	0.0707429	0.0489548
100.021	14.4375	0.192567	0.157304	0.159451	0.190061	0.182538	0.149943	0.139686	0.0518007	0.0345553
100.021	14.4792	0.201281	0.164022	0.167575	0.19367	0.183919	0.147354	0.142618	0.0472089	0.0316926
100.021	14.5208	0.207779	0.172299	0.176421	0.201324	0.188222	0.152729	0.149386	0.045297	0.0300201
100.021	14.5625	0.198688	0.167878	0.172567	0.199177	0.187069	0.160506	0.151635	0.0394432	0.0264295
100.021	14.6042	0.201026	0.176831	0.179251	0.204752	0.198442	0.177462	0.165714	0.0475783	0.0323958
100.021	14.6458	0.198736	0.176487	0.179699	0.204242	0.199876	0.176265	0.161941	0.0449643	0.0303022
100.021	14.6875	0.208179	0.182748	0.188298	0.213773	0.206831	0.175578	0.161486	0.0416011	0.0286622
100.021	14.7292	0.224259	0.197335	0.202143	0.227236	0.218638	0.183087	0.168	0.0471784	0.0368737
100.021	14.7708	0.231708	0.206155	0.207692	0.231717	0.224464	0.185957	0.168075	0.0537715	0.0440003
100.021	14.8125	0.242911	0.217299	0.21465	0.2381	0.234372	0.192449	0.169524	0.0637798	0.0513109
100.021	14.8542	0.260058	0.230913	0.223326	0.245827	0.247966	0.20335	0.172479	0.0752129	0.0597909
100.021	14.8958	0.258121	0.225017	0.211879	0.237603	0.242161	0.192746	0.157377	0.0655426	0.0542366
100.021	14.9375	0.237533	0.200546	0.183337	0.214707	0.214969	0.162119	0.126366	0.0427183	0.0400558
100.021	14.9792	0.251517	0.21097	0.194151	0.231936	0.225119	0.171047	0.132776	0.0451025	0.0424267
100.021	15.0208	0.224147	0.180198	0.169175	0.208815	0.204405	0.147328	0.114701	0.0357572	0.0328544
100.021	15.0625	0.219161	0.171215	0.16709	0.203403	0.203959	0.14474	0.11885	0.039956	0.0333507
100.021	15.1042	0.237385	0.191047	0.187526	0.222495	0.221843	0.162751	0.142965	0.0617027	0.0488443
100.021	15.1458	0.24094	0.198357	0.19954	0.23493	0.232183	0.17285	0.159025	0.0795857	0.0670826
100.021	15.1875	0.224259	0.186914	0.198548	0.234257	0.23239	0.175644	0.167227	0.0866235	0.0763099
100.021	15.2292	0.214122	0.183587	0.197028	0.239549	0.235703	0.185841	0.179408	0.109987	0.102431
100.021	15.2708	0.219441	0.182177	0.191505	0.238918	0.241659	0.191737	0.189873	0.124024	0.110583
100.021	15.3125	0.23433	0.195902	0.206507	0.252681	0.257571	0.210218	0.217984	0.14852	0.123161
100.021	15.3542	0.262407	0.223932	0.235948	0.277579	0.276143	0.241641	0.257546	0.191501	0.146842
100.021	15.3958	0.245789	0.204427	0.222298	0.27826	0.271679	0.24086	0.251316	0.177259	0.104717
100.021	15.4375	0.240503	0.205901	0.228261	0.280062	0.273356	0.251197	0.264406	0.198178	0.129226
100.021	15.4792	0.249478	0.216372	0.243454	0.293292	0.290687	0.272611	0.290869	0.251043	0.222299
100.021	15.5208	0.248152	0.218279	0.244869	0.288073	0.287864	0.268353	0.292033	0.256341	0.240845
100.021	15.5625	0.277571	0.256017	0.273695	0.304474	0.305316	0.293198	0.311972	0.284005	0.282269
100.021	15.6042	0.289588	0.270165	0.28194	0.316296	0.31707	0.304393	0.324898	0.302821	0.308425
100.021	15.6458	0.318572	0.305004	0.308478	0.331303	0.332854	0.325986	0.33917	0.323077	0.330438
100.021	15.6875	0.31509	0.297955	0.297384	0.323451	0.321369	0.315464	0.328387	0.310421	0.318156
100.021	15.7292	0.303528	0.284873	0.284512	0.3053	0.301606	0.299739	0.308355	0.285351	0.294031
100.021	15.7708	0.295817	0.272136	0.272967	0.288548	0.284476	0.284223	0.288577	0.259966	0.271548
100.021	15.8125	0.305487	0.2864	0.290087	0.293954	0.291488	0.295386	0.29463	0.264464	0.277518
100.021	15.8542	0.311018	0.292215	0.297866	0.296937	0.294695	0.299938	0.295464	0.26458	0.279851
100.021	15.8958	0.307468	0.277752	0.283704	0.285834	0.285609	0.288885	0.282497	0.251816	0.271623
100.021	15.9375	0.323216	0.291634	0.298485	0.302028	0.302956	0.308445	0.296743	0.272593	0.290772
100.021	15.9792	0.333463	0.308075	0.315933	0.317472	0.319075	0.326923	0.311693	0.290632	0.307911
100.021	16.0208	0.307359	0.28133	0.292002	0.293187	0.297015	0.311627	0.293734	0.271165	0.292717
100.021	16.0625	0.279748	0.253512	0.268885	0.26648	0.275537	0.301091	0.279197	0.255187	0.278674
100.021	16.1042	0.265199	0.235198	0.255674	0.24631	0.263109	0.300379	0.27464	0.25012	0.272569
100.021	16.1458	0.253383	0.218645	0.245741	0.232253	0.258364	0.30452	0.275961	0.251557	0.27274
100.021	16.1875	0.175863	0.147687	0.205775	0.192867	0.235607	0.297694	0.257148	0.230689	0.255944
100.021	16.2292	0.0985652	0.0795373	0.161126	0.154581	0.206536	0.288832	0.241102	0.208833	0.237753
100.021	16.2708	0.0580718	0.0558481	0.140433	0.136465	0.187822	0.275907	0.225282	0.192071	0.21919
100.021	16.3125	0.048566	0.0581468	0.13879	0.136803	0.188255	0.271585	0.223822	0.189757	0.21246
100.021	16.3542	0.073684	0.0809818	0.155746	0.148306	0.196255	0.274653	0.227832	0.190929	0.211479
100.021	16.3958	0.128158	0.126361	0.188141	0.168739	0.208885	0.281242	0.235546	0.192815	0.212713
100.021	16.4375	0.184042	0.175887	0.229175	0.198457	0.227992	0.29302	0.250043	0.20499	0.2236
100.021	16.4792	0.174517	0.173125	0.235714	0.201559	0.224809	0.287417	0.242618	0.195424	0.213489
100.021	16.5208	0.196696	0.198409	0.258741	0.221714	0.239738	0.295767	0.253804	0.208962	0.226079
100.021	16.5625	0.20267	0.211515	0.274673	0.238857	0.249845	0.301985	0.261002	0.216482	0.230199
100.021	16.6042	0.162927	0.197488	0.279279	0.248527	0.255674	0.302376	0.257751	0.21237	0.226433
100.021	16.6458	0.127554	0.195965	0.292049	0.266005	0.272214	0.312917	0.266578	0.220618	0.236972
100.021	16.6875	0.120854	0.211721	0.310919	0.291393	0.295364	0.330034	0.286223	0.237061	0.253462
100.021	16.7292	0.116087	0.215374	0.319034	0.308993	0.313809	0.339319	0.304866	0.249862	0.263641
100.021	16.7708	0.1063	0.218412	0.31681	0.311122	0.314353	0.335574	0.296316	0.231925	0.239013
100.021	16.8125	0.102523	0.225864	0.316593	0.315655	0.316245	0.333812	0.288271	0.217011	0.212681
100.021	16.8542	0.108714	0.222818	0.311717	0.307286	0.304592	0.324813	0.26574	0.189671	0.179259
100.021	16.8958	0.12926	0.230019	0.312577	0.308983	0.304903	0.32224	0.259995	0.176984	0.171645
100.021	16.9375	0.157307	0.2456	0.318325	0.321229	0.317027	0.32884	0.271709	0.178673	0.180689
100.021	16.9792	0.184153	0.258145	0.325163	0.327255	0.323289	0.332179	0.274188	0.174373	0.181528
100.021	17.0208	0.175099	0.247584	0.316826	0.318972	0.312175	0.31871	0.250211	0.147149	0.15534
100.021	17.0625	0.187246	0.240836	0.306481	0.299165	0.293098	0.300675	0.220338	0.119018	0.127909
100.021	17.1042	0.213635	0.24573	0.301636	0.28089	0.280027	0.288369	0.199293	0.100428	0.105234
100.021	17.1458	0.242651	0.260312	0.305149	0.274015	0.279432	0.285697	0.196164	0.0945455	0.0952068
100.021	17.1875	0.263044	0.275844	0.314458	0.277216	0.28463	0.290494	0.200627	0.0981689	0.0957321
100.021	17.2292	0.278357	0.291608	0.327214	0.289046	0.295712	0.304286	0.214117	0.110549	0.104923
100.021	17.2708	0.252019	0.268359	0.309837	0.263854	0.271853	0.284448	0.187827	0.0824509	0.0799361
100.021	17.3125	0.225043	0.242734	0.290392	0.239209	0.251156	0.268411	0.165242	0.0607742	0.0613147
100.021	17.3542	0.205453	0.222676	0.27892	0.228706	0.244805	0.26431	0.15367	0.0481197	0.0515747
100.021	17.3958	0.206314	0.222923	0.285876	0.247313	0.265958	0.283307	0.169007	0.0530838	0.0512163
100.021	17.4375	0.211136	0.227162	0.293301	0.267239	0.285009	0.3034	0.189572	0.0677392	0.0558151
100.021	17.4792	0.202788	0.21672	0.284161	0.259164	0.277279	0.29808	0.181682	0.0587779	0.0432412
100.021	17.5208	0.202326	0.213392	0.279186	0.257079	0.272574	0.294545	0.18223	0.0626874	0.0459508
100.021	17.5625	0.208006	0.215634	0.280845	0.261859	0.273066	0.295687	0.195883	0.0776887	0.0599896
100.021	17.6042	0.201423	0.207457	0.274284	0.257186	0.264925	0.288918	0.199967	0.0902144	0.0715419
100.021	17.6458	0.219748	0.225923	0.285962	0.274552	0.281619	0.302606	0.232389	0.128047	0.102495
100.021	17.6875	0.233008	0.241541	0.294083	0.2848	0.291502	0.314968	0.256288	0.160846	0.132623
100.021	17.7292	0.237574	0.246784	0.294253	0.282061	0.291961	0.316013	0.264738	0.171348	0.151935
100.021	17.7708	0.212676	0.22672	0.278455	0.26203	0.271092	0.302723	0.249645	0.154138	0.140685
100.021	17.8125	0.195988	0.211913	0.26999	0.250833	0.258364	0.297682	0.242111	0.142175	0.135697
100.021	17.8542	0.191269	0.20847	0.269436	0.247152	0.253592	0.296124	0.24007	0.143521	0.143922
100.021	17.8958	0.203586	0.223248	0.278827	0.25346	0.259687	0.3002	0.2473	0.16529	0.171094
100.021	17.9375	0.231861	0.249605	0.294338	0.268312	0.274445	0.311755	0.266058	0.201159	0.211326
100.021	17.9792	0.281048	0.294043	0.321868	0.300752	0.305685	0.338116	0.306023	0.255555	0.268027
100.021	18.0208	0.242119	0.258545	0.296601	0.263564	0.276687	0.314554	0.27925	0.229418	0.245013
100.021	18.0625	0.210526	0.228691	0.275213	0.228547	0.247952	0.292541	0.254943	0.210242	0.229354
100.021	18.1042	0.19826	0.214099	0.266013	0.211066	0.231563	0.281235	0.246668	0.206833	0.230188
100.021	18.1458	0.211356	0.222445	0.273087	0.221158	0.237554	0.28635	0.255503	0.224029	0.250221
100.021	18.1875	0.229718	0.238125	0.282334	0.240047	0.252653	0.298138	0.267693	0.243298	0.270617
100.021	18.2292	0.226574	0.235363	0.276635	0.234722	0.247895	0.296574	0.263641	0.238941	0.269916
100.021	18.2708	0.240656	0.247784	0.28296	0.242291	0.252533	0.296746	0.270089	0.24987	0.284994
100.021	18.3125	0.200861	0.212071	0.255828	0.202167	0.210163	0.266297	0.23227	0.208701	0.255515
100.021	18.3542	0.200502	0.21326	0.256916	0.194317	0.202817	0.258141	0.222464	0.203662	0.255152
100.021	18.3958	0.215402	0.227842	0.268518	0.202546	0.21393	0.263566	0.229143	0.217452	0.269577
100.021	18.4375	0.239469	0.249671	0.286146	0.2253	0.237619	0.279361	0.25009	0.2453	0.292036
100.021	18.4792	0.267363	0.274108	0.305386	0.254643	0.266821	0.300939	0.2763	0.277195	0.316207
100.021	18.5208	0.263628	0.268341	0.295595	0.239771	0.255843	0.29778	0.258824	0.260553	0.308505
100.021	18.5625	0.24517	0.253423	0.283688	0.216347	0.234223	0.281734	0.232528	0.233635	0.290513
100.021	18.6042	0.24237	0.248544	0.282086	0.212496	0.227711	0.277036	0.219412	0.221347	0.283425
100.021	18.6458	0.25211	0.252391	0.287168	0.221888	0.233657	0.284641	0.218163	0.225587	0.286735
100.021	18.6875	0.250935	0.249083	0.280855	0.20407	0.219186	0.275689	0.207049	0.214571	0.278981
100.021	18.7292	0.274478	0.272008	0.295724	0.211667	0.230758	0.289366	0.227126	0.233129	0.294933
100.021	18.7708	0.290084	0.285971	0.303064	0.213269	0.239456	0.299215	0.239248	0.24418	0.303036
100.021	18.8125	0.283506	0.279448	0.297033	0.201464	0.232202	0.296884	0.235069	0.238037	0.293744
100.021	18.8542	0.257893	0.257057	0.281843	0.180265	0.206825	0.276515	0.211282	0.214742	0.273348
100.021	18.8958	0.232161	0.234856	0.26707	0.163937	0.183456	0.255469	0.187623	0.192404	0.255508
100.021	18.9375	0.223139	0.224977	0.260074	0.161052	0.174093	0.245569	0.178301	0.182211	0.247769
100.021	18.9792	0.231224	0.228003	0.259867	0.169725	0.180045	0.247988	0.183617	0.186195	0.250416
100.021	19.0208	0.261748	0.252882	0.279284	0.204033	0.213994	0.271676	0.213271	0.215637	0.276391
100.021	19.0625	0.245983	0.240092	0.27151	0.187304	0.194758	0.25766	0.198275	0.200154	0.261338
100.021	19.1042	0.237769	0.231405	0.269003	0.181709	0.185191	0.249635	0.191864	0.190863	0.252723
100.021	19.1458	0.203635	0.201164	0.244063	0.151253	0.151317	0.226955	0.173255	0.159671	0.222018
100.021	19.1875	0.187288	0.188268	0.230718	0.136165	0.134457	0.219033	0.17011	0.145017	0.204659
100.021	19.2292	0.197932	0.197876	0.238712	0.145937	0.146567	0.235947	0.191793	0.158199	0.214804
100.021	19.2708	0.218063	0.216772	0.255723	0.169243	0.176455	0.262134	0.223737	0.185463	0.237255
100.021	19.3125	0.244669	0.242427	0.279724	0.203614	0.213021	0.288722	0.261218	0.224658	0.266551
100.021	19.3542	0.249604	0.24665	0.289288	0.215692	0.222372	0.299028	0.275874	0.240636	0.277715
100.021	19.3958	0.243715	0.242266	0.280966	0.208316	0.217484	0.291748	0.27233	0.235717	0.273546
100.021	19.4375	0.231926	0.231341	0.268789	0.199276	0.214099	0.28138	0.265157	0.229244	0.266578
100.021	19.4792	0.231203	0.234239	0.270269	0.207844	0.226624	0.28654	0.271922	0.237862	0.269832
100.021	19.5208	0.24283	0.25244	0.287055	0.232223	0.251181	0.303431	0.290263	0.258652	0.287589
100.021	19.5625	0.250027	0.258604	0.293538	0.243731	0.260021	0.309534	0.300506	0.270412	0.297283
100.021	19.6042	0.261455	0.266735	0.302411	0.255359	0.270829	0.318745	0.313622	0.286948	0.307478
100.021	19.6458	0.252673	0.257803	0.295729	0.247421	0.264577	0.313468	0.308397	0.280684	0.298368
100.021	19.6875	0.242322	0.247467	0.2891	0.241169	0.261942	0.308908	0.30145	0.272375	0.289759
100.021	19.7292	0.240004	0.245157	0.289147	0.245198	0.270276	0.312567	0.30163	0.27274	0.289173
100.021	19.7708	0.246981	0.249814	0.294834	0.25673	0.285583	0.323536	0.307758	0.278975	0.293925
100.021	19.8125	0.268183	0.266053	0.309162	0.278944	0.307748	0.339238	0.321324	0.293911	0.306463
100.021	19.8542	0.259186	0.258138	0.304332	0.274262	0.301624	0.334409	0.316602	0.28845	0.29949
100.021	19.8958	0.231562	0.236921	0.289871	0.251322	0.277845	0.314512	0.301295	0.272638	0.282992
100.021	19.9375	0.219299	0.225562	0.284363	0.235486	0.261936	0.304017	0.293929	0.263282	0.275196
100.021	19.9792	0.233994	0.234348	0.290255	0.239044	0.264606	0.310115	0.301432	0.268955	0.280896
100.021	20.0208	0.22601	0.218917	0.278947	0.223395	0.247414	0.295659	0.287758	0.255247	0.276688
100.021	20.0625	0.239729	0.22879	0.278691	0.230902	0.253331	0.297269	0.294135	0.259754	0.286402
100.021	20.1042	0.218292	0.204519	0.259385	0.211199	0.230248	0.286923	0.276239	0.236725	0.269114
100.021	20.1458	0.221469	0.205826	0.258457	0.215241	0.229423	0.293419	0.274539	0.23472	0.26489
100.021	20.1875	0.221569	0.206038	0.252871	0.211263	0.229125	0.28979	0.26678	0.223031	0.251607
100.021	20.2292	0.236509	0.221636	0.262586	0.222648	0.23963	0.293476	0.267822	0.220587	0.249667
100.021	20.2708	0.228715	0.211194	0.248358	0.213056	0.224273	0.279363	0.254063	0.202502	0.238205
100.021	20.3125	0.237766	0.22039	0.252801	0.221866	0.227601	0.279446	0.254059	0.204725	0.24299
100.021	20.3542	0.247857	0.234124	0.262092	0.234457	0.234621	0.280581	0.255145	0.211277	0.246506
100.021	20.3958	0.256197	0.240935	0.264753	0.238469	0.236455	0.275953	0.250622	0.211001	0.241822
100.021	6.5625	0.194128	0.145882	0.165263	0.152853	0.131589	0.118806	0.109196	0.102597	0.131497
100.021	6.60417	0.183314	0.132343	0.15129	0.137443	0.111581	0.0995339	0.0964764	0.0863472	0.114197
100.021	6.64583	0.144905	0.09823	0.115919	0.0985859	0.0744976	0.0656255	0.0658158	0.05663	0.0794194
100.021	6.6875	0.102734	0.0668892	0.0834692	0.0646104	0.0482187	0.0404184	0.0397269	0.0324563	0.0497453
100.021	6.72917	0.08778	0.0586934	0.0763089	0.0575417	0.0416974	0.033899	0.0303473	0.0236771	0.0405024
100.021	6.77083	0.078188	0.0529647	0.0701827	0.0567782	0.0359686	0.0279821	0.0239989	0.0199677	0.0350599
100.021	6.8125	0.0758335	0.0519839	0.0685484	0.0626444	0.032011	0.026366	0.0238794	0.0190839	0.0356942
100.021	6.85417	0.0949905	0.0685542	0.0819628	0.0800622	0.0371111	0.0319506	0.0325901	0.0249751	0.0476047
100.021	6.89583	0.131085	0.0970736	0.106095	0.107951	0.0519369	0.0426783	0.0494982	0.0412313	0.0700533
100.021	6.9375	0.144274	0.101493	0.100829	0.11489	0.0585532	0.0424905	0.0526001	0.0451409	0.0700247
100.021	6.97917	0.175327	0.122795	0.119521	0.142273	0.0882305	0.0562496	0.0708688	0.0623295	0.0830666
100.021	7.02083	0.167945	0.122448	0.112405	0.132121	0.0888085	0.060677	0.0739793	0.0595926	0.0810908
100.021	7.0625	0.156258	0.111097	0.0999351	0.118366	0.0841139	0.05792	0.0686475	0.0499318	0.0715157
100.021	7.10417	0.148182	0.0980753	0.0903078	0.106678	0.0779262	0.0545169	0.062354	0.0412282	0.0601948
100.021	7.14583	0.16857	0.111541	0.109575	0.121719	0.086913	0.0643703	0.0753761	0.052669	0.0651512
100.021	7.1875	0.15789	0.105742	0.105904	0.115775	0.0762192	0.0532608	0.0661019	0.0507643	0.0583656
100.021	7.22917	0.134182	0.0896058	0.091301	0.0995609	0.0571114	0.0348014	0.0460427	0.0390372	0.0452898
100.021	7.27083	0.146891	0.10398	0.105325	0.110794	0.057949	0.0357577	0.0469123	0.0416327	0.0565138
100.021	7.3125	0.154116	0.110443	0.111164	0.114632	0.0602094	0.0358986	0.043976	0.0390785	0.0649003
100.021	7.35417	0.159275	0.11406	0.114321	0.119603	0.0671176	0.0377235	0.0420276	0.0385499	0.0689338
100.021	7.39583	0.134229	0.0951575	0.0975856	0.108361	0.054527	0.0292407	0.0331133	0.0331462	0.0556669
100.021	7.4375	0.132406	0.0975431	0.105217	0.114463	0.0515477	0.0288377	0.0306122	0.0365596	0.0602402
100.021	7.47917	0.154089	0.121836	0.134344	0.135292	0.0602492	0.0360407	0.0345925	0.0492061	0.0841167
100.021	7.52083	0.17821	0.143249	0.15628	0.154271	0.0729561	0.0395587	0.0396359	0.0523331	0.0871132
100.021	7.5625	0.187472	0.1548	0.165526	0.157876	0.0770091	0.0390716	0.0459136	0.0499998	0.0792551
100.021	7.60417	0.17417	0.144518	0.152012	0.138061	0.0672561	0.0362873	0.0443888	0.0411571	0.0632638
100.021	7.64583	0.17873	0.152514	0.151848	0.131404	0.0690669	0.0432249	0.0548728	0.0465143	0.0629915
100.021	7.6875	0.19628	0.173038	0.166833	0.142017	0.0821535	0.0591811	0.0766229	0.0599162	0.0730082
100.021	7.72917	0.226296	0.204099	0.198085	0.173651	0.111857	0.0910962	0.11212	0.0833918	0.0968848
100.021	7.77083	0.22183	0.200736	0.193139	0.17638	0.1151	0.0904936	0.116526	0.0872569	0.103472
100.021	7.8125	0.220521	0.19792	0.190936	0.180764	0.120047	0.0898191	0.119678	0.0949549	0.113221
100.021	7.85417	0.230677	0.203988	0.199715	0.192309	0.130682	0.0980011	0.128555	0.108246	0.125214
100.021	7.89583	0.217435	0.192433	0.188145	0.180716	0.123094	0.0920965	0.122189	0.101796	0.116282
100.021	7.9375	0.196387	0.171474	0.167584	0.161443	0.106758	0.0794811	0.110402	0.0909755	0.105794
100.021	7.97917	0.202011	0.17527	0.172744	0.164107	0.110945	0.0827051	0.113421	0.0947624	0.109803
100.021	8.02083	0.217318	0.185817	0.185118	0.173315	0.12334	0.0908291	0.119447	0.10244	0.119844
100.021	8.0625	0.221759	0.18749	0.18904	0.171876	0.122407	0.0906406	0.115408	0.100061	0.1247
100.021	8.10417	0.220722	0.184712	0.188597	0.166502	0.116948	0.0907362	0.105258	0.097746	0.127736
100.021	8.14583	0.219714	0.182723	0.185575	0.15964	0.110037	0.089127	0.093974	0.0953599	0.129076
100.021	8.1875	0.227184	0.193358	0.193595	0.160325	0.110904	0.0886302	0.0862904	0.0943165	0.131542
100.021	8.22917	0.225736	0.194055	0.200457	0.162882	0.118605	0.0935883	0.0882808	0.0976941	0.134724
100.021	8.27083	0.237351	0.205408	0.218434	0.184118	0.141602	0.115626	0.105951	0.116591	0.151457
100.021	8.3125	0.253094	0.22088	0.236941	0.207849	0.168353	0.141903	0.128216	0.139331	0.174067
100.021	8.35417	0.246438	0.214317	0.229119	0.201592	0.16444	0.13223	0.118297	0.129316	0.162925
100.021	8.39583	0.224941	0.193656	0.202542	0.179499	0.143819	0.104565	0.09123	0.10531	0.136854
100.021	8.4375	0.199839	0.169378	0.170194	0.152992	0.116242	0.0780378	0.0711945	0.082436	0.109478
100.021	8.47917	0.20428	0.171719	0.169078	0.157962	0.116352	0.0865652	0.0853875	0.0840132	0.107523
100.021	8.52083	0.221511	0.186647	0.182972	0.176625	0.134335	0.113441	0.115629	0.101797	0.12527
100.021	9.4375	0.291538	0.272408	0.283921	0.292386	0.268776	0.241443	0.223976	0.208944	0.239368
100.021	9.47917	0.251491	0.236876	0.241964	0.252362	0.222371	0.192834	0.17829	0.167696	0.197212
100.021	9.52083	0.26129	0.247267	0.253843	0.258522	0.233703	0.209585	0.190404	0.186388	0.216896
100.021	9.5625	0.301809	0.290682	0.301684	0.299359	0.280033	0.267376	0.246058	0.241929	0.270367
100.021	9.72917	0.267919	0.251723	0.251545	0.255338	0.229059	0.221631	0.221546	0.205992	0.223709
100.021	9.77083	0.264255	0.247582	0.247781	0.252394	0.223567	0.215252	0.217363	0.20503	0.222197
100.062	13.0208	0.284731	0.261125	0.263444	0.271596	0.273845	0.198901	0.109643	0.0973217	0.146849
100.062	13.0625	0.273453	0.247574	0.248514	0.261833	0.268446	0.186961	0.0978251	0.0775738	0.126252
100.062	13.1042	0.268902	0.242228	0.240014	0.260351	0.270192	0.186042	0.0938118	0.0700308	0.12078
100.062	13.1458	0.275364	0.246409	0.241152	0.27054	0.280978	0.196914	0.100898	0.0784339	0.131796
100.062	13.4375	0.195491	0.150237	0.145945	0.185833	0.206924	0.0724923	0.0222586	0.0230546	0.0492841
100.062	13.4792	0.200584	0.15076	0.147054	0.195045	0.212981	0.0746003	0.0251745	0.0277281	0.0557123
100.062	13.5208	0.204421	0.151362	0.145058	0.202011	0.213003	0.076338	0.0307576	0.0358466	0.0649025
100.062	13.5625	0.233693	0.1845	0.176356	0.236145	0.237546	0.102077	0.0495372	0.0573966	0.0938952
100.062	13.6042	0.249779	0.202869	0.194686	0.255148	0.249575	0.118303	0.0564427	0.0678136	0.112495
100.062	13.6458	0.252491	0.204454	0.196487	0.259365	0.249414	0.112088	0.052199	0.0670117	0.109399
100.062	13.6875	0.244016	0.196353	0.185401	0.250234	0.238893	0.095275	0.039749	0.0583368	0.0924653
100.062	13.7292	0.221659	0.172383	0.161364	0.228288	0.220913	0.0735769	0.026279	0.044081	0.071091
100.062	13.7708	0.209763	0.156523	0.149267	0.215485	0.210919	0.0682281	0.0235879	0.0364666	0.0574797
100.062	13.8125	0.180724	0.127416	0.127669	0.187419	0.184862	0.0579687	0.0172175	0.0262976	0.0427106
100.062	13.8542	0.184601	0.139416	0.139531	0.192034	0.189767	0.0652406	0.0182056	0.0239292	0.0460583
100.062	13.8958	0.217986	0.173996	0.172453	0.221181	0.223047	0.0952647	0.0311675	0.0324536	0.0668101
100.062	13.9375	0.239821	0.194228	0.19267	0.240142	0.244294	0.123012	0.0473222	0.046102	0.0791853
100.062	13.9792	0.232685	0.18791	0.191377	0.241412	0.245499	0.125307	0.0552842	0.0443253	0.0726791
100.062	14.0208	0.231185	0.185446	0.192685	0.246737	0.24957	0.132182	0.0702651	0.0500642	0.0686118
100.062	14.0625	0.22645	0.180676	0.186708	0.243594	0.242124	0.132246	0.0797179	0.0569558	0.0638996
100.062	14.1042	0.24552	0.203923	0.206296	0.258781	0.254347	0.15668	0.109494	0.0777119	0.0799067
100.062	14.1458	0.257776	0.219581	0.223234	0.269556	0.263411	0.180273	0.133774	0.0927562	0.095512
100.062	14.1875	0.26025	0.224564	0.23078	0.272904	0.264496	0.190599	0.145305	0.0973492	0.10053
100.062	14.2292	0.237352	0.201106	0.206092	0.247754	0.235763	0.164944	0.124496	0.0794094	0.0793281
100.062	14.2708	0.230625	0.195639	0.198431	0.235487	0.22035	0.157093	0.122207	0.0731488	0.0696254
100.062	14.3125	0.217051	0.184653	0.185628	0.218504	0.201604	0.148168	0.120978	0.0630952	0.0567754
100.062	14.3542	0.201942	0.169748	0.171509	0.202302	0.188016	0.142638	0.123378	0.0550803	0.0433798
100.062	14.3958	0.207295	0.17309	0.175233	0.203682	0.196139	0.156248	0.141969	0.0649765	0.0448813
100.062	14.4375	0.210221	0.174768	0.175943	0.20184	0.198988	0.160323	0.149753	0.0671646	0.0459308
100.062	14.4792	0.213598	0.175795	0.176316	0.198904	0.195039	0.154842	0.147178	0.0584053	0.0424643
100.062	14.5208	0.191771	0.154229	0.155138	0.180475	0.177511	0.140595	0.13153	0.0410637	0.0314746
100.062	14.5625	0.185355	0.152689	0.152118	0.180013	0.179006	0.149036	0.138018	0.035475	0.0290652
100.062	14.6042	0.194769	0.165067	0.16375	0.191802	0.19343	0.16959	0.156973	0.0441463	0.0307731
100.062	14.6458	0.203167	0.173062	0.176012	0.202127	0.205101	0.179914	0.164261	0.0488711	0.0300481
100.062	14.6875	0.204574	0.173673	0.180522	0.205259	0.20507	0.173411	0.156876	0.0425852	0.0243924
100.062	14.7292	0.214599	0.183717	0.189438	0.213677	0.210935	0.176008	0.157646	0.0438831	0.0288447
100.062	14.7708	0.243109	0.215107	0.217208	0.239005	0.235519	0.200116	0.178014	0.0617065	0.0458518
100.062	14.8125	0.262781	0.238583	0.236705	0.256858	0.254322	0.21754	0.190278	0.0815816	0.0617039
100.062	14.8542	0.259363	0.234295	0.227538	0.250464	0.251253	0.207078	0.176747	0.0769029	0.061928
100.062	14.8958	0.242001	0.213841	0.201695	0.231091	0.231763	0.180444	0.148032	0.0546164	0.0493823
100.062	14.9375	0.233638	0.200213	0.184805	0.220306	0.218141	0.163656	0.127578	0.0411605	0.0427922
100.062	14.9792	0.234353	0.195903	0.181066	0.223768	0.2145	0.157825	0.119976	0.0384359	0.0427897
100.062	15.0208	0.2209	0.179191	0.168025	0.2153	0.20085	0.140825	0.108831	0.0365157	0.0391172
100.062	15.0625	0.210822	0.167855	0.167245	0.208927	0.201261	0.136525	0.113358	0.0409897	0.0407648
100.062	15.1042	0.214538	0.171218	0.175142	0.212772	0.208031	0.141283	0.121579	0.0486627	0.0408732
100.062	15.1458	0.208624	0.163893	0.174603	0.213591	0.209167	0.140058	0.121892	0.0468328	0.0385618
100.062	15.1875	0.201072	0.157618	0.175536	0.217379	0.216191	0.146225	0.140654	0.0599688	0.0515487
100.062	15.2292	0.211659	0.168292	0.182802	0.234594	0.23559	0.170455	0.170759	0.0935402	0.0798164
100.062	15.2708	0.217767	0.169837	0.177673	0.235646	0.239879	0.176694	0.18025	0.103275	0.0863664
100.062	15.3125	0.248183	0.200184	0.204367	0.258226	0.266954	0.211237	0.216122	0.145713	0.127335
100.062	15.3542	0.227681	0.179749	0.186673	0.251747	0.255491	0.214155	0.227405	0.142186	0.0989219
100.062	15.3958	0.226542	0.180713	0.195106	0.263395	0.261919	0.234231	0.248714	0.168372	0.112789
100.062	15.4375	0.247063	0.201241	0.218541	0.280977	0.277341	0.26324	0.274571	0.210459	0.165144
100.062	15.4792	0.246342	0.207366	0.231227	0.28589	0.282367	0.265856	0.28327	0.233668	0.206044
100.062	15.5208	0.254676	0.221112	0.247643	0.292835	0.292805	0.273361	0.29622	0.259492	0.251877
100.062	15.5625	0.266725	0.238403	0.262249	0.300813	0.300686	0.283942	0.307031	0.277451	0.282157
100.062	15.6042	0.277422	0.253997	0.267394	0.299639	0.299814	0.285058	0.304711	0.281589	0.288471
100.062	15.6458	0.304968	0.286608	0.292012	0.312861	0.315089	0.305409	0.318192	0.299661	0.308563
100.062	15.6875	0.305422	0.285205	0.284565	0.30993	0.308731	0.300112	0.312187	0.291481	0.300574
100.062	15.7292	0.308795	0.293139	0.291903	0.31093	0.307493	0.304305	0.313529	0.292051	0.302898
100.062	15.7708	0.305682	0.291303	0.290745	0.301998	0.299204	0.30052	0.306585	0.281178	0.293121
100.062	15.8125	0.307913	0.292543	0.292395	0.297616	0.295269	0.300165	0.302354	0.272625	0.285479
100.062	15.8542	0.315102	0.303266	0.303418	0.304413	0.302046	0.308197	0.305408	0.273279	0.286884
100.062	15.8958	0.314741	0.296912	0.300334	0.301755	0.299674	0.30639	0.303092	0.275964	0.292455
100.062	15.9375	0.324905	0.30302	0.308115	0.308048	0.308708	0.31606	0.308059	0.28702	0.303637
100.062	15.9792	0.30717	0.291106	0.299541	0.296106	0.296872	0.306793	0.291689	0.268203	0.289716
100.062	16.0208	0.291566	0.27533	0.284465	0.278181	0.28057	0.29684	0.27477	0.247886	0.274876
100.062	16.0625	0.255563	0.252047	0.268109	0.258188	0.266981	0.290353	0.266001	0.241721	0.270742
100.062	16.1042	0.242032	0.23681	0.258338	0.241901	0.256795	0.29189	0.263537	0.238765	0.267552
100.062	16.1458	0.224219	0.204883	0.23806	0.215993	0.242714	0.289173	0.252613	0.227542	0.258155
100.062	16.1875	0.142765	0.120419	0.183267	0.161411	0.204577	0.272079	0.219545	0.191219	0.227105
100.062	16.2292	0.0739842	0.0671071	0.147799	0.135272	0.185273	0.268814	0.212698	0.17943	0.216346
100.062	16.2708	0.0370396	0.0399838	0.125603	0.124613	0.178132	0.2703	0.21509	0.179686	0.214058
100.062	16.3125	0.0318079	0.0414111	0.122557	0.124796	0.175447	0.264453	0.211767	0.175945	0.203888
100.062	16.3542	0.0481328	0.0592886	0.136031	0.127409	0.172193	0.25702	0.20334	0.166744	0.190354
100.062	16.3958	0.0861954	0.0944337	0.166162	0.146274	0.184336	0.262965	0.210884	0.169364	0.191728
100.062	16.4375	0.148433	0.150458	0.214786	0.183688	0.213006	0.281889	0.234376	0.190564	0.213277
100.062	16.4792	0.160797	0.170746	0.238441	0.20343	0.224868	0.286285	0.239847	0.195655	0.218474
100.062	16.5208	0.174417	0.191464	0.258706	0.22052	0.236641	0.291962	0.248184	0.20497	0.227089
100.062	16.5625	0.163785	0.196726	0.268746	0.231439	0.241812	0.295056	0.25129	0.206454	0.226564
100.062	16.6042	0.119675	0.189102	0.276027	0.242175	0.249579	0.298668	0.251801	0.207106	0.226149
100.062	16.6458	0.101169	0.208103	0.299566	0.274201	0.278234	0.317314	0.273753	0.231411	0.249959
100.062	16.6875	0.0974047	0.199384	0.299767	0.279729	0.282933	0.318934	0.277432	0.230198	0.248815
100.062	16.7292	0.0865744	0.187837	0.299041	0.286058	0.291448	0.321677	0.284486	0.230956	0.248097
100.062	16.7708	0.0761742	0.187729	0.298533	0.290555	0.296362	0.320919	0.282926	0.222534	0.233944
100.062	16.8125	0.0708128	0.198729	0.299872	0.295136	0.297871	0.318912	0.275295	0.208943	0.208143
100.062	16.8542	0.0806505	0.205057	0.301888	0.293661	0.292313	0.315761	0.259399	0.188023	0.180773
100.062	16.8958	0.109621	0.227863	0.314109	0.308253	0.304451	0.323419	0.263418	0.183689	0.18127
100.062	16.9375	0.145562	0.251384	0.327621	0.326449	0.321448	0.334212	0.272973	0.183757	0.188007
100.062	16.9792	0.169629	0.265212	0.33587	0.337433	0.331644	0.339725	0.277527	0.181883	0.190583
100.062	17.0208	0.169924	0.25424	0.324313	0.327201	0.31938	0.32729	0.263964	0.163767	0.173972
100.062	17.0625	0.193361	0.249375	0.314321	0.308956	0.30144	0.311324	0.235015	0.136386	0.146886
100.062	17.1042	0.22083	0.25301	0.308853	0.292864	0.289959	0.299226	0.213759	0.116732	0.124917
100.062	17.1458	0.247359	0.264971	0.310031	0.28554	0.288566	0.295319	0.208693	0.108901	0.114
100.062	17.1875	0.263687	0.276691	0.315809	0.284183	0.290399	0.296304	0.208235	0.107455	0.110043
100.062	17.2292	0.269082	0.284009	0.322829	0.287299	0.294798	0.301924	0.213516	0.111399	0.111846
100.062	17.2708	0.234478	0.257174	0.309918	0.2675	0.281115	0.291651	0.195891	0.0947802	0.0934947
100.062	17.3125	0.204444	0.228579	0.290448	0.244044	0.25975	0.275369	0.172429	0.0712548	0.0714834
100.062	17.3542	0.186448	0.212456	0.281186	0.237835	0.256474	0.27461	0.164736	0.0595222	0.0599076
100.062	17.3958	0.184679	0.211359	0.283849	0.251539	0.273565	0.290099	0.177478	0.0640881	0.0588773
100.062	17.4375	0.180853	0.202711	0.27905	0.250816	0.273771	0.294126	0.181896	0.061815	0.0471978
100.062	17.4792	0.177581	0.194807	0.272255	0.24622	0.267555	0.292122	0.18009	0.057567	0.0399572
100.062	17.5208	0.172067	0.186779	0.262525	0.240178	0.258341	0.283417	0.173846	0.0548364	0.0399516
100.062	17.5625	0.178363	0.190799	0.263587	0.245218	0.258767	0.284349	0.186992	0.0671326	0.0538566
100.062	17.6042	0.174615	0.183526	0.254992	0.237418	0.24846	0.276839	0.187115	0.0761115	0.0643759
100.062	17.6458	0.200354	0.209153	0.27243	0.257543	0.265331	0.29244	0.21933	0.11237	0.095972
100.062	17.6875	0.230838	0.239124	0.293073	0.280154	0.288342	0.3128	0.255188	0.154006	0.134279
100.062	17.7292	0.259219	0.26493	0.310514	0.300536	0.310013	0.330973	0.286283	0.193268	0.177026
100.062	17.7708	0.239969	0.248608	0.298597	0.284932	0.293157	0.321008	0.274214	0.178825	0.164771
100.062	17.8125	0.219009	0.231103	0.287067	0.269396	0.275828	0.311509	0.26159	0.161998	0.152228
100.062	17.8542	0.187209	0.200665	0.264625	0.240361	0.245364	0.289653	0.232509	0.136904	0.133532
100.062	17.8958	0.187652	0.202503	0.263868	0.235165	0.241616	0.286085	0.23073	0.144249	0.145169
100.062	17.9375	0.213581	0.22743	0.277089	0.247133	0.257067	0.296113	0.249473	0.177376	0.180992
100.062	17.9792	0.251377	0.262288	0.29861	0.26866	0.279376	0.31501	0.279174	0.221747	0.228141
100.062	18.0208	0.246166	0.261702	0.298717	0.2621	0.268182	0.311474	0.27853	0.223567	0.237398
100.062	18.0625	0.226353	0.245376	0.287596	0.23716	0.251557	0.295962	0.265509	0.215713	0.235194
100.062	18.1042	0.222419	0.240936	0.285936	0.228593	0.245949	0.290145	0.263806	0.223798	0.247237
100.062	18.1458	0.21047	0.224176	0.2743	0.21884	0.234445	0.286189	0.256047	0.2185	0.246209
100.062	18.1875	0.243099	0.251489	0.293299	0.251621	0.262958	0.307399	0.279114	0.253537	0.280398
100.062	18.2292	0.238166	0.245157	0.285835	0.242486	0.253265	0.300724	0.270725	0.247497	0.278619
100.062	18.2708	0.218055	0.22657	0.269702	0.219629	0.227912	0.281319	0.249719	0.225154	0.265183
100.062	18.3125	0.206644	0.218126	0.262248	0.204905	0.212138	0.26704	0.234267	0.209328	0.258571
100.062	18.3542	0.208719	0.221041	0.263423	0.200259	0.211876	0.263745	0.23	0.208956	0.262729
100.062	18.3958	0.22409	0.236071	0.274471	0.212437	0.228687	0.272885	0.241814	0.229046	0.279619
100.062	18.4375	0.24815	0.258527	0.292758	0.238285	0.255092	0.289276	0.263822	0.259592	0.302264
100.062	18.4792	0.275688	0.282762	0.312725	0.267601	0.283567	0.309003	0.288091	0.28995	0.325539
100.062	18.5208	0.258801	0.269711	0.301695	0.246707	0.266298	0.298853	0.267732	0.26869	0.310764
100.062	18.5625	0.240151	0.252458	0.289503	0.221789	0.244047	0.283934	0.239872	0.23853	0.290671
100.062	18.6042	0.235392	0.244285	0.283821	0.214246	0.233715	0.276616	0.221048	0.218479	0.278505
100.062	18.6458	0.244351	0.247675	0.285397	0.221729	0.236448	0.281466	0.216443	0.218171	0.280112
100.062	18.6875	0.253704	0.253741	0.287527	0.220541	0.235532	0.284023	0.216858	0.220606	0.283924
100.062	18.7292	0.264	0.26129	0.289847	0.20919	0.230481	0.285896	0.219745	0.224662	0.288211
100.062	18.7708	0.276412	0.272177	0.295921	0.206659	0.233723	0.293696	0.230554	0.233507	0.294173
100.062	18.8125	0.264399	0.261199	0.288419	0.193668	0.222675	0.288465	0.226633	0.224871	0.28251
100.062	18.8542	0.256525	0.256146	0.285074	0.19118	0.219514	0.289362	0.228167	0.222545	0.276845
100.062	18.8958	0.236556	0.239138	0.274689	0.179565	0.20244	0.275003	0.210798	0.205243	0.263716
100.062	18.9375	0.226975	0.228443	0.267998	0.176079	0.191402	0.264443	0.19957	0.193841	0.255759
100.062	18.9792	0.232947	0.230911	0.26652	0.182391	0.193321	0.263259	0.202949	0.195727	0.257504
100.062	19.0208	0.232472	0.227991	0.26056	0.175206	0.186955	0.256863	0.200126	0.191411	0.253617
100.062	19.0625	0.205059	0.205413	0.242746	0.141932	0.155194	0.232803	0.175498	0.166465	0.229931
100.062	19.1042	0.195088	0.195993	0.240393	0.135139	0.143143	0.223585	0.167493	0.158657	0.221613
100.062	19.1458	0.184357	0.183979	0.234056	0.13034	0.133587	0.217701	0.163254	0.149855	0.211284
100.062	19.1875	0.180816	0.184627	0.234251	0.131023	0.133315	0.221731	0.174099	0.150412	0.209436
100.062	19.2292	0.162567	0.168001	0.216723	0.113851	0.116208	0.212157	0.165643	0.130891	0.188425
100.062	19.2708	0.184611	0.18728	0.233156	0.135111	0.141543	0.236459	0.195051	0.153535	0.20895
100.062	19.3125	0.219532	0.218542	0.263598	0.174945	0.182657	0.268026	0.237194	0.197798	0.244608
100.062	19.3542	0.238387	0.236703	0.281881	0.202887	0.20815	0.286549	0.262938	0.230816	0.270352
100.062	19.3958	0.226276	0.226644	0.270452	0.191977	0.200499	0.276395	0.256683	0.226215	0.266096
100.062	19.4375	0.211527	0.214796	0.258109	0.1792	0.194522	0.267143	0.251602	0.219873	0.256631
100.062	19.4792	0.217161	0.225491	0.267529	0.194272	0.214481	0.278841	0.267781	0.237118	0.263672
100.062	19.5208	0.229114	0.24181	0.282918	0.217368	0.236833	0.294051	0.28607	0.256826	0.279418
100.062	19.5625	0.231217	0.241025	0.281278	0.221041	0.237229	0.296664	0.291465	0.262747	0.283528
100.062	19.6042	0.247982	0.252259	0.291028	0.23619	0.25154	0.309369	0.307008	0.281047	0.29674
100.062	19.6458	0.258108	0.261519	0.299495	0.247616	0.263104	0.318201	0.317437	0.292482	0.305051
100.062	19.6875	0.246205	0.252199	0.294219	0.243861	0.260379	0.312879	0.310559	0.282996	0.296038
100.062	19.7292	0.243193	0.25057	0.29516	0.248957	0.267134	0.314371	0.309442	0.281073	0.294045
100.062	19.7708	0.252042	0.257096	0.30193	0.262015	0.282523	0.323648	0.315772	0.28755	0.299758
100.062	19.8125	0.254077	0.256055	0.30321	0.267696	0.286964	0.328405	0.31581	0.287667	0.298761
100.062	19.8542	0.260309	0.259919	0.307321	0.275841	0.293923	0.331971	0.316302	0.289794	0.300349
100.062	19.8958	0.232684	0.241417	0.293648	0.254361	0.272533	0.311992	0.301816	0.281341	0.288194
100.062	19.9375	0.228288	0.237123	0.290413	0.246824	0.264869	0.305271	0.298387	0.282815	0.290219
100.062	19.9792	0.246059	0.246959	0.297871	0.25643	0.273908	0.314633	0.306383	0.291315	0.300464
100.062	20.0208	0.238126	0.237412	0.291949	0.244763	0.261545	0.300558	0.294887	0.276172	0.294307
100.062	20.0625	0.238837	0.228238	0.281519	0.238136	0.249437	0.298757	0.294928	0.260031	0.287463
100.062	20.1042	0.225972	0.21389	0.267632	0.224172	0.230755	0.29352	0.281998	0.239263	0.272531
100.062	20.1458	0.2199	0.204464	0.255	0.212796	0.21924	0.285882	0.265901	0.220858	0.253924
100.062	20.1875	0.217661	0.19629	0.242756	0.200211	0.211015	0.273454	0.249625	0.200411	0.234885
100.062	20.2292	0.234199	0.207803	0.247802	0.207445	0.218431	0.275714	0.248132	0.195584	0.232788
100.062	20.2708	0.244225	0.2182	0.248141	0.212027	0.219968	0.275521	0.243856	0.190731	0.231701
100.062	20.3125	0.251954	0.230456	0.254498	0.224251	0.226984	0.278623	0.246862	0.197452	0.238989
100.062	20.3542	0.252218	0.236117	0.257994	0.230619	0.228002	0.271678	0.239524	0.196824	0.237183
100.062	6.52083	0.198053	0.153562	0.162371	0.156087	0.136785	0.132531	0.126001	0.117895	0.147333
100.062	6.5625	0.177716	0.132627	0.142739	0.135254	0.114423	0.104784	0.104915	0.0921019	0.121348
100.062	6.60417	0.158417	0.113413	0.126527	0.115506	0.0916467	0.0820616	0.087321	0.0693127	0.0973267
100.062	6.64583	0.17582	0.130727	0.140613	0.131762	0.0964998	0.0875798	0.0979896	0.0700464	0.102794
100.062	6.6875	0.169591	0.126836	0.136627	0.127149	0.087672	0.0779214	0.0848581	0.0586891	0.092455
100.062	6.72917	0.126431	0.0901408	0.102828	0.0896484	0.0599935	0.053663	0.0507585	0.03704	0.0600192
100.062	6.77083	0.0946346	0.0623647	0.0710265	0.0667268	0.0440589	0.0396573	0.0337999	0.0261039	0.0419464
100.062	6.8125	0.0989885	0.0617952	0.0681604	0.0730828	0.0433487	0.0402562	0.0362936	0.027173	0.0469815
100.062	6.85417	0.114625	0.0706974	0.0753372	0.0865796	0.0464406	0.0435279	0.0435114	0.0324383	0.0606818
100.062	6.89583	0.111654	0.0709594	0.0709571	0.080706	0.0380042	0.0385021	0.0407843	0.0308217	0.0587113
100.062	6.9375	0.14946	0.102607	0.099928	0.115685	0.0588639	0.049914	0.0589373	0.0523998	0.0825303
100.062	6.97917	0.173779	0.120194	0.113033	0.136852	0.0832909	0.0591786	0.0704451	0.0655069	0.0905633
100.062	7.02083	0.169351	0.11984	0.10832	0.130287	0.0853938	0.0601709	0.0725077	0.0634084	0.086622
100.062	7.0625	0.166381	0.11413	0.102395	0.123176	0.0840676	0.0580109	0.0695517	0.0569549	0.0762995
100.062	7.10417	0.172541	0.113427	0.106523	0.123888	0.0860522	0.0605381	0.0720865	0.0540409	0.0716607
100.062	7.14583	0.174728	0.111152	0.108684	0.122838	0.0862328	0.0610227	0.0752381	0.0506933	0.0648346
100.062	7.1875	0.157618	0.100079	0.102194	0.112782	0.0684534	0.0479372	0.0619735	0.0460843	0.057716
100.062	7.22917	0.153731	0.101366	0.105379	0.114555	0.0621679	0.042258	0.0576626	0.0448881	0.0566046
100.062	7.27083	0.139598	0.09185	0.0960788	0.102987	0.0494394	0.0339322	0.045882	0.0363523	0.052704
100.062	7.3125	0.143292	0.0948151	0.0995195	0.10358	0.0506018	0.0324151	0.0415134	0.0328266	0.0594095
100.062	7.35417	0.132697	0.0855201	0.0908768	0.0965549	0.0479421	0.0270126	0.0314103	0.0246204	0.0537342
100.062	7.39583	0.139351	0.0958238	0.100814	0.114492	0.0569213	0.0317615	0.031529	0.0291294	0.0549484
100.062	7.4375	0.146548	0.107897	0.113758	0.128175	0.0626768	0.0352249	0.0321504	0.0361833	0.0658629
100.062	7.47917	0.18019	0.142882	0.149534	0.160749	0.0834221	0.0497978	0.0433434	0.0532547	0.0953858
100.062	7.52083	0.208079	0.169613	0.176698	0.184296	0.101002	0.0605105	0.055312	0.0676165	0.113929
100.062	7.5625	0.181567	0.144876	0.155167	0.159138	0.0788281	0.043332	0.0397261	0.0434934	0.081343
100.062	7.60417	0.150795	0.117992	0.125945	0.123573	0.0568354	0.03081	0.0283172	0.0271868	0.0573568
100.062	7.64583	0.168486	0.138771	0.140402	0.126868	0.0637054	0.0383949	0.0434861	0.038663	0.0663286
100.062	7.6875	0.194477	0.16789	0.16329	0.140433	0.0789982	0.0554722	0.0708103	0.05787	0.0832492
100.062	7.72917	0.222506	0.196909	0.190075	0.164729	0.100831	0.0833981	0.10434	0.0825487	0.108699
100.062	7.77083	0.222534	0.195589	0.187577	0.16736	0.104428	0.090493	0.11395	0.0891226	0.116634
100.062	7.8125	0.224819	0.195979	0.188473	0.173788	0.110327	0.091957	0.119594	0.0966567	0.125968
100.062	7.85417	0.235493	0.208421	0.200295	0.187154	0.124702	0.103099	0.130859	0.107468	0.135055
100.062	7.89583	0.206051	0.177163	0.168447	0.157312	0.103939	0.083842	0.111834	0.0883585	0.112914
100.062	7.9375	0.206876	0.17611	0.168639	0.156212	0.105886	0.085323	0.113537	0.0890771	0.111418
100.062	7.97917	0.213133	0.177701	0.171654	0.157118	0.109525	0.0876871	0.116034	0.0923648	0.113451
100.062	8.02083	0.225852	0.186875	0.180953	0.164591	0.120195	0.0948775	0.12093	0.0997373	0.121485
100.062	8.0625	0.259293	0.223001	0.214156	0.19747	0.155406	0.124051	0.142956	0.126665	0.152543
100.062	8.10417	0.262875	0.229669	0.22018	0.199791	0.159433	0.126789	0.139838	0.130956	0.162347
100.062	8.14583	0.255561	0.222242	0.212225	0.187523	0.144326	0.114059	0.121618	0.121518	0.155606
100.062	8.1875	0.249652	0.21537	0.206024	0.177511	0.129119	0.105882	0.105097	0.112124	0.148431
100.062	8.22917	0.246628	0.211842	0.209417	0.177871	0.132638	0.11179	0.103201	0.113531	0.15187
100.062	8.27083	0.234702	0.20285	0.210011	0.178908	0.140715	0.115507	0.102353	0.113892	0.148989
100.062	8.3125	0.234295	0.204273	0.217358	0.192369	0.158041	0.127093	0.111529	0.123476	0.156144
100.062	8.35417	0.233702	0.203163	0.21675	0.194614	0.161754	0.125764	0.109982	0.122943	0.156253
100.062	8.39583	0.218533	0.186561	0.193142	0.1729	0.136875	0.10077	0.0921471	0.105317	0.137057
100.062	8.4375	0.228525	0.196203	0.196494	0.179105	0.136666	0.105735	0.103802	0.109774	0.139137
100.062	9.47917	0.290906	0.273419	0.284855	0.291985	0.26714	0.239702	0.227091	0.219542	0.247234
100.062	9.5625	0.29246	0.277657	0.287076	0.290678	0.270358	0.249935	0.232848	0.227873	0.255509
100.062	9.6875	0.273697	0.258919	0.258787	0.260109	0.240984	0.229719	0.226472	0.209608	0.234324
100.062	9.72917	0.28033	0.261666	0.262383	0.266897	0.246633	0.242365	0.238917	0.223589	0.246663
100.104	13.4375	0.250619	0.204519	0.19657	0.238007	0.253559	0.120071	0.050119	0.0532859	0.0865651
100.104	13.4792	0.228195	0.178017	0.172919	0.221385	0.237847	0.0991528	0.0400254	0.043902	0.0734022
100.104	13.5208	0.196107	0.140441	0.137454	0.194648	0.21063	0.0699265	0.0249684	0.0305392	0.051736
100.104	13.5625	0.188438	0.134591	0.128346	0.193495	0.20235	0.0641985	0.0233966	0.0288537	0.0509414
100.104	13.6042	0.207239	0.15513	0.143012	0.213034	0.213116	0.0742146	0.0276615	0.0382352	0.0685417
100.104	13.6458	0.217596	0.165476	0.155659	0.224815	0.221991	0.0704926	0.0263778	0.0441164	0.0748348
100.104	13.6875	0.222694	0.170415	0.160079	0.23091	0.222828	0.0684835	0.0243268	0.0430088	0.0722112
100.104	13.7292	0.222599	0.168302	0.157704	0.228901	0.218982	0.0666486	0.0226194	0.0387653	0.0629293
100.104	13.7708	0.206001	0.151194	0.143245	0.2136	0.205734	0.057233	0.019765	0.0309007	0.0493324
100.104	13.8125	0.18931	0.131574	0.131113	0.194739	0.187507	0.0528307	0.0172497	0.0270549	0.0424796
100.104	13.8542	0.180481	0.132103	0.131286	0.189237	0.183903	0.0555044	0.0158288	0.0231276	0.0431351
100.104	13.8958	0.212254	0.167223	0.165107	0.218305	0.218467	0.0868971	0.0273648	0.0308904	0.0639495
100.104	13.9375	0.243208	0.194757	0.194619	0.246443	0.250836	0.124348	0.0509354	0.0447082	0.0841503
100.104	13.9792	0.219797	0.173174	0.177234	0.231116	0.233206	0.107643	0.0490889	0.0333769	0.0598336
100.104	14.0208	0.216852	0.168055	0.172805	0.231351	0.229968	0.107266	0.056482	0.0363352	0.0509005
100.104	14.0625	0.217501	0.169559	0.172935	0.231804	0.226843	0.114174	0.0666718	0.0438905	0.0492791
100.104	14.1042	0.230506	0.184102	0.188381	0.241004	0.235106	0.13473	0.0857693	0.0568865	0.0618203
100.104	14.1458	0.237733	0.191848	0.19956	0.246967	0.240629	0.150544	0.0984752	0.0651611	0.0729941
100.104	14.1875	0.246804	0.203142	0.212591	0.256188	0.247709	0.166227	0.114415	0.0734808	0.0818539
100.104	14.2292	0.224023	0.182637	0.190016	0.231844	0.221154	0.14553	0.0989703	0.0615702	0.0661689
100.104	14.2708	0.211137	0.173369	0.177265	0.214822	0.202053	0.134612	0.0944031	0.0554998	0.0562373
100.104	14.3125	0.205874	0.171988	0.173947	0.205681	0.191768	0.132633	0.100464	0.0523692	0.0503722
100.104	14.3542	0.2124	0.179071	0.181498	0.206965	0.194659	0.14287	0.119063	0.0562905	0.0490267
100.104	14.3958	0.225106	0.189622	0.192188	0.21239	0.205604	0.160726	0.144431	0.0690625	0.0536497
100.104	14.4375	0.230065	0.193003	0.193243	0.21184	0.212673	0.172599	0.160337	0.0814493	0.0616068
100.104	14.4792	0.218932	0.178545	0.177147	0.196273	0.199004	0.159395	0.147054	0.0641028	0.0516149
100.104	14.5208	0.201151	0.162584	0.15873	0.179	0.186567	0.149194	0.135833	0.0472707	0.0419458
100.104	14.5625	0.196165	0.161679	0.155014	0.176826	0.186906	0.153566	0.140026	0.0398045	0.037829
100.104	14.6042	0.209081	0.175259	0.169318	0.194296	0.203092	0.17319	0.158973	0.0487445	0.0379147
100.104	14.6458	0.22048	0.186266	0.185081	0.210873	0.218751	0.189193	0.170985	0.0584241	0.0373698
100.104	14.6875	0.212664	0.177925	0.180131	0.203437	0.209764	0.176224	0.155055	0.0484108	0.0285942
100.104	14.7292	0.224037	0.190772	0.192061	0.214977	0.220299	0.183949	0.16006	0.0514571	0.0314325
100.104	14.7708	0.242616	0.212923	0.210055	0.232474	0.235995	0.198568	0.172664	0.0630411	0.0447446
100.104	14.8125	0.264355	0.239524	0.235056	0.256103	0.255988	0.217581	0.185978	0.0817013	0.061946
100.104	14.8542	0.257038	0.231919	0.224404	0.247828	0.247333	0.203507	0.168843	0.070403	0.0567846
100.104	14.8958	0.240757	0.215042	0.203421	0.233505	0.231122	0.181194	0.146943	0.052307	0.048222
100.104	14.9375	0.232138	0.203413	0.190651	0.227392	0.22101	0.166763	0.129956	0.0429791	0.0465036
100.104	14.9792	0.231168	0.198684	0.18903	0.231108	0.219955	0.161538	0.121865	0.0421827	0.0491002
100.104	15.0208	0.226605	0.19164	0.184471	0.230245	0.212369	0.150376	0.114539	0.04315	0.0495445
100.104	15.0625	0.207702	0.169972	0.172358	0.218047	0.203234	0.135419	0.108189	0.0394907	0.042858
100.104	15.1042	0.180889	0.139932	0.151875	0.19648	0.187364	0.113642	0.0957139	0.0272505	0.0248765
100.104	15.1458	0.176024	0.13896	0.158154	0.200866	0.194894	0.116207	0.0985531	0.0282419	0.0251032
100.104	15.1875	0.168729	0.131768	0.156617	0.201207	0.20141	0.122531	0.11231	0.0371145	0.0335312
100.104	15.2292	0.179853	0.13744	0.15355	0.212511	0.213673	0.141334	0.136216	0.0566417	0.0497252
100.104	15.2708	0.201646	0.151098	0.16375	0.228644	0.227246	0.161658	0.161217	0.0818711	0.0737342
100.104	15.3125	0.214796	0.162835	0.174347	0.241269	0.239672	0.184153	0.189896	0.107736	0.0994594
100.104	15.3542	0.223568	0.175038	0.183969	0.256288	0.254551	0.220127	0.230658	0.151905	0.135299
100.104	15.3958	0.253097	0.206553	0.215333	0.28523	0.2878	0.27144	0.281257	0.227497	0.216549
100.104	15.4375	0.242154	0.195779	0.216052	0.279872	0.280228	0.259781	0.270258	0.213188	0.200428
100.104	15.4792	0.255654	0.215867	0.240061	0.291148	0.292057	0.273275	0.286234	0.245095	0.240672
100.104	15.5208	0.283285	0.247063	0.27249	0.311115	0.314278	0.298376	0.314436	0.290382	0.294026
100.104	15.5625	0.271248	0.23728	0.258469	0.294054	0.296681	0.279873	0.296495	0.272186	0.278921
100.104	15.6042	0.275304	0.243147	0.257587	0.289259	0.291336	0.274057	0.288347	0.268436	0.277258
100.104	15.6458	0.30018	0.272419	0.280771	0.302463	0.304665	0.290801	0.301349	0.285805	0.295396
100.104	15.6875	0.301388	0.271716	0.273236	0.300675	0.300238	0.286343	0.296546	0.27939	0.287667
100.104	15.7292	0.303728	0.281251	0.281159	0.300568	0.299053	0.290136	0.29907	0.277741	0.287129
100.104	15.7708	0.31082	0.292518	0.290431	0.304469	0.300547	0.299016	0.306246	0.282476	0.292469
100.104	15.8125	0.31609	0.302546	0.299686	0.308043	0.304632	0.309335	0.313376	0.286696	0.296609
100.104	15.8542	0.318415	0.314239	0.310774	0.315618	0.313577	0.320135	0.318758	0.28948	0.299819
100.104	15.8958	0.319444	0.310574	0.30879	0.314593	0.311224	0.319498	0.317046	0.289755	0.303496
100.104	15.9375	0.304108	0.296366	0.300221	0.300185	0.297786	0.308249	0.299828	0.274687	0.293817
100.104	15.9792	0.271933	0.276759	0.288405	0.281223	0.28084	0.294095	0.276905	0.25225	0.277034
100.104	16.0208	0.251142	0.264388	0.27912	0.266104	0.268781	0.286456	0.260655	0.233858	0.264062
100.104	16.0625	0.207765	0.249581	0.274309	0.259412	0.266342	0.288868	0.261609	0.237359	0.270343
100.104	16.1042	0.192116	0.236425	0.266481	0.245715	0.254604	0.290588	0.259344	0.233597	0.267155
100.104	16.1458	0.177356	0.194588	0.235656	0.207902	0.231707	0.278968	0.235663	0.209393	0.248775
100.104	16.1875	0.111092	0.114063	0.179932	0.153561	0.194432	0.258982	0.202339	0.171098	0.217168
100.104	16.2292	0.0582443	0.0652307	0.144425	0.128322	0.175447	0.255777	0.195676	0.159629	0.204686
100.104	16.2708	0.0330746	0.0388017	0.124887	0.120008	0.170848	0.260488	0.202236	0.165586	0.205595
100.104	16.3125	0.0256713	0.0325643	0.117951	0.118584	0.167082	0.257731	0.202247	0.165935	0.200434
100.104	16.3542	0.0354023	0.0465005	0.129703	0.117933	0.159452	0.245898	0.188795	0.153759	0.182111
100.104	16.3958	0.0560081	0.0729919	0.156235	0.13535	0.170486	0.250271	0.19499	0.15702	0.183318
100.104	16.4375	0.0979503	0.11976	0.201212	0.170985	0.198841	0.270089	0.218327	0.178547	0.205139
100.104	16.4792	0.143816	0.173082	0.249032	0.214053	0.233487	0.291517	0.244135	0.206397	0.231472
100.104	16.5208	0.145164	0.192082	0.267011	0.228558	0.243721	0.295793	0.250393	0.212987	0.236957
100.104	16.5625	0.116165	0.194212	0.273935	0.235201	0.24717	0.297535	0.2504	0.210119	0.233991
100.104	16.6042	0.0859219	0.197284	0.284213	0.2479	0.256748	0.304384	0.253869	0.213101	0.23566
100.104	16.6458	0.0781797	0.193244	0.285759	0.256133	0.261976	0.306986	0.261013	0.218016	0.23917
100.104	16.6875	0.069675	0.174588	0.279599	0.255167	0.259368	0.303319	0.259107	0.212145	0.232908
100.104	16.7292	0.0613056	0.161606	0.279274	0.26212	0.268304	0.305525	0.265872	0.214897	0.23378
100.104	16.7708	0.0507497	0.153286	0.279867	0.268702	0.277071	0.308543	0.270535	0.215323	0.230462
100.104	16.8125	0.0473721	0.171411	0.285396	0.276142	0.281532	0.308081	0.266474	0.206468	0.209311
100.104	16.8542	0.0506839	0.17462	0.28631	0.271086	0.272583	0.302501	0.249107	0.182618	0.179063
100.104	16.8958	0.0783658	0.202842	0.302225	0.288438	0.287046	0.311884	0.254834	0.179325	0.179498
100.104	16.9375	0.118636	0.232809	0.318599	0.31019	0.307826	0.324423	0.264947	0.180619	0.185987
100.104	16.9792	0.139969	0.251358	0.328222	0.326901	0.320529	0.329036	0.263888	0.173317	0.183346
100.104	17.0208	0.153927	0.24577	0.319496	0.325219	0.318729	0.326617	0.260169	0.163969	0.174265
100.104	17.0625	0.189815	0.245703	0.31148	0.312788	0.307465	0.315946	0.239268	0.142294	0.153337
100.104	17.1042	0.217202	0.249972	0.305031	0.298022	0.29528	0.302929	0.218707	0.123	0.135351
100.104	17.1458	0.241038	0.259952	0.304729	0.288347	0.289591	0.296746	0.20913	0.112267	0.124223
100.104	17.1875	0.258248	0.271872	0.31105	0.286513	0.290702	0.296971	0.210328	0.110493	0.121294
100.104	17.2292	0.254631	0.270736	0.313992	0.282517	0.290103	0.297403	0.210578	0.107452	0.11719
100.104	17.2708	0.214776	0.240657	0.30132	0.26103	0.2752	0.28752	0.19206	0.0889763	0.0976771
100.104	17.3125	0.191441	0.223617	0.295721	0.259418	0.276721	0.290707	0.189453	0.0855106	0.0902342
100.104	17.3542	0.178908	0.214752	0.290948	0.261502	0.279254	0.295175	0.19002	0.0815622	0.0801988
100.104	17.3958	0.171944	0.208647	0.288191	0.26587	0.287055	0.30331	0.196377	0.0830678	0.0732706
100.104	17.4375	0.153502	0.181478	0.26881	0.240382	0.266494	0.288406	0.180147	0.0618721	0.0416484
100.104	17.4792	0.16185	0.180851	0.265433	0.240871	0.263951	0.291628	0.185238	0.0655418	0.0432906
100.104	17.5208	0.149976	0.166295	0.249471	0.230387	0.249232	0.276642	0.17273	0.05583	0.0410082
100.104	17.5625	0.151763	0.166118	0.244787	0.230235	0.24554	0.272542	0.178506	0.0603035	0.0523971
100.104	17.6042	0.151245	0.162672	0.237234	0.222659	0.237628	0.267853	0.1809	0.0679409	0.0633607
100.104	17.6458	0.177484	0.189345	0.256586	0.243242	0.255813	0.285219	0.21157	0.103092	0.0943928
100.104	17.6875	0.217571	0.230105	0.287043	0.275647	0.286296	0.312851	0.256069	0.151442	0.140669
100.104	17.7292	0.239476	0.248322	0.297574	0.282443	0.291073	0.321699	0.27265	0.171227	0.154028
100.104	17.7708	0.237475	0.246097	0.296023	0.279172	0.285888	0.318236	0.268587	0.17021	0.151793
100.104	17.8125	0.215028	0.225497	0.281783	0.260226	0.266797	0.30284	0.248057	0.151178	0.136123
100.104	17.8542	0.185244	0.19565	0.258939	0.230649	0.237935	0.280489	0.220262	0.126743	0.118538
100.104	17.8958	0.182916	0.192529	0.254814	0.22305	0.232432	0.275898	0.217704	0.129536	0.12629
100.104	17.9375	0.196912	0.206315	0.258587	0.224681	0.239656	0.278449	0.22941	0.150096	0.149362
100.104	17.9792	0.234647	0.243921	0.281727	0.247601	0.26368	0.2993	0.262681	0.195416	0.197304
100.104	18.0208	0.226465	0.238924	0.278903	0.234977	0.245679	0.292179	0.258483	0.195151	0.205038
100.104	18.0625	0.211925	0.22704	0.272963	0.217374	0.226151	0.280903	0.249153	0.187228	0.207821
100.104	18.1042	0.207277	0.223949	0.271429	0.20687	0.220249	0.274338	0.246548	0.191855	0.21945
100.104	18.1458	0.201703	0.216753	0.267284	0.203848	0.218789	0.274209	0.243635	0.193613	0.22553
100.104	18.1875	0.238425	0.247896	0.289972	0.241818	0.255088	0.300239	0.269868	0.235301	0.265858
100.104	18.2292	0.227881	0.24075	0.281613	0.231592	0.240929	0.28867	0.259195	0.231183	0.265067
100.104	18.2708	0.206336	0.220044	0.261323	0.20486	0.212925	0.266364	0.234472	0.207606	0.251275
100.104	18.3125	0.196159	0.210176	0.250862	0.189728	0.198409	0.251663	0.219964	0.195175	0.245833
100.104	18.3542	0.199425	0.212583	0.251867	0.188859	0.203003	0.251244	0.220197	0.200661	0.253086
100.104	18.3958	0.218663	0.230898	0.267471	0.211371	0.228862	0.267892	0.239841	0.228414	0.276531
100.104	18.4375	0.23686	0.248055	0.283507	0.235379	0.253783	0.285871	0.259139	0.25426	0.296619
100.104	18.4792	0.251352	0.262192	0.296617	0.249642	0.268801	0.296306	0.27241	0.270331	0.307784
100.104	18.5208	0.25063	0.262544	0.297696	0.244616	0.266216	0.294826	0.267322	0.265618	0.304092
100.104	18.5625	0.246581	0.255909	0.295593	0.233588	0.257512	0.289182	0.252126	0.248104	0.295647
100.104	18.6042	0.246644	0.252369	0.293257	0.229563	0.250721	0.286157	0.236876	0.230385	0.287102
100.104	18.6458	0.254097	0.256517	0.294218	0.23574	0.252627	0.2903	0.231397	0.226945	0.288074
100.104	18.6875	0.267753	0.268162	0.302631	0.247601	0.261897	0.29949	0.238934	0.23875	0.298369
100.104	18.7292	0.275343	0.273439	0.302428	0.234939	0.253709	0.299368	0.237476	0.239987	0.300362
100.104	18.7708	0.262481	0.260882	0.292814	0.214752	0.236664	0.290662	0.228786	0.22668	0.286977
100.104	18.8125	0.248753	0.247815	0.284289	0.200563	0.222409	0.283675	0.222994	0.21475	0.274574
100.104	18.8542	0.241534	0.242573	0.28152	0.196903	0.217584	0.284247	0.223908	0.211974	0.269587
100.104	18.8958	0.245012	0.246591	0.286535	0.203122	0.222795	0.293402	0.234273	0.219836	0.274674
100.104	18.9375	0.246099	0.245741	0.28715	0.205881	0.221642	0.293643	0.235094	0.219633	0.27555
100.104	18.9792	0.250427	0.248272	0.285681	0.210127	0.222419	0.291994	0.236831	0.219725	0.27817
100.104	19.0208	0.233119	0.232446	0.269456	0.1865	0.202079	0.275071	0.220968	0.20107	0.261742
100.104	19.0625	0.20524	0.20801	0.249282	0.149631	0.170028	0.250247	0.195753	0.175838	0.237166
100.104	19.1042	0.188725	0.193371	0.241034	0.129564	0.148449	0.23548	0.182246	0.163405	0.224321
100.104	19.1458	0.191272	0.192947	0.243876	0.133817	0.145513	0.236742	0.185802	0.166656	0.225675
100.104	19.1875	0.201607	0.20157	0.251777	0.14977	0.157661	0.246042	0.201631	0.178224	0.233574
100.104	19.2292	0.184572	0.184767	0.237291	0.134495	0.139657	0.235019	0.190318	0.160283	0.214182
100.104	19.2708	0.200862	0.200725	0.250392	0.15232	0.159083	0.248793	0.210772	0.175412	0.225721
100.104	19.3125	0.216027	0.214557	0.264233	0.171579	0.17839	0.260566	0.230502	0.196581	0.241437
100.104	19.3542	0.206978	0.207466	0.257847	0.166957	0.175602	0.25693	0.229825	0.200622	0.244929
100.104	19.3958	0.220023	0.222567	0.268105	0.18786	0.197269	0.273055	0.251558	0.228631	0.266055
100.104	19.4375	0.208283	0.216119	0.259448	0.178799	0.193909	0.269329	0.252696	0.227439	0.259189
100.104	19.4792	0.213153	0.225199	0.269548	0.19296	0.212735	0.28175	0.271129	0.244803	0.266474
100.104	19.5208	0.219422	0.230823	0.275389	0.205827	0.223701	0.288248	0.282596	0.256618	0.27474
100.104	19.5625	0.229529	0.237249	0.277811	0.216828	0.232431	0.295118	0.291913	0.268417	0.284329
100.104	19.6042	0.24611	0.250569	0.287943	0.231994	0.247634	0.309309	0.307425	0.285874	0.297796
100.104	19.6458	0.270068	0.273408	0.308592	0.257139	0.271885	0.328631	0.329445	0.309366	0.316602
100.104	19.6875	0.262323	0.268599	0.306902	0.258478	0.270941	0.325003	0.325061	0.302174	0.309345
100.104	19.7292	0.260267	0.268347	0.307767	0.264689	0.275667	0.325638	0.32306	0.299211	0.306102
100.104	19.7708	0.250997	0.257655	0.303377	0.259919	0.269703	0.322303	0.319502	0.292961	0.299544
100.104	19.8125	0.253944	0.257006	0.304105	0.265109	0.274075	0.323405	0.317546	0.290659	0.296347
100.104	19.8542	0.271689	0.271734	0.315004	0.281495	0.292063	0.329979	0.320956	0.294471	0.302597
100.104	19.8958	0.267483	0.268946	0.313109	0.275955	0.287405	0.322308	0.314325	0.292043	0.30206
100.104	19.9375	0.254224	0.254476	0.30158	0.260952	0.272704	0.31268	0.305355	0.288312	0.301879
100.104	19.9792	0.248615	0.245076	0.296416	0.255356	0.266053	0.310987	0.304625	0.288052	0.305211
100.104	20.0208	0.247082	0.244224	0.295466	0.255008	0.262868	0.310278	0.301217	0.2813	0.302458
100.104	20.0625	0.259006	0.252404	0.299049	0.264105	0.267073	0.31833	0.306888	0.274492	0.300732
100.104	20.1042	0.246389	0.2394	0.285751	0.249484	0.250856	0.30947	0.294363	0.251255	0.283352
100.104	20.1458	0.230305	0.217901	0.260439	0.22219	0.222829	0.284223	0.262641	0.215249	0.251097
100.104	20.1875	0.232217	0.212207	0.250273	0.212279	0.213785	0.271225	0.244217	0.195944	0.233734
100.104	20.2292	0.244483	0.218015	0.250342	0.21396	0.217142	0.270994	0.237827	0.188059	0.22783
100.104	20.2708	0.260405	0.232663	0.255399	0.222804	0.226637	0.277479	0.239392	0.190124	0.23135
100.104	20.3125	0.271688	0.247268	0.263307	0.236611	0.237699	0.284562	0.245397	0.19969	0.241317
100.104	20.3542	0.262891	0.24026	0.256867	0.229284	0.223697	0.265647	0.227008	0.182575	0.226934
100.104	6.52083	0.202669	0.157164	0.155337	0.152676	0.136845	0.138145	0.139616	0.126496	0.156418
100.104	6.5625	0.180396	0.135469	0.136607	0.131294	0.11477	0.108152	0.116789	0.0980256	0.128748
100.104	6.60417	0.123721	0.0819415	0.0948561	0.0863398	0.071021	0.0652005	0.0743185	0.0490848	0.0707788
100.104	6.64583	0.169203	0.125131	0.133441	0.127812	0.0969372	0.0836814	0.10109	0.0666898	0.102582
100.104	6.6875	0.180613	0.135906	0.14333	0.142865	0.0993372	0.0855387	0.0986678	0.0655874	0.103168
100.104	6.72917	0.12257	0.0833908	0.0931805	0.0904877	0.0579641	0.0528154	0.0494166	0.0335948	0.0512361
100.104	6.77083	0.118767	0.0767263	0.0799359	0.0827102	0.0548614	0.0494302	0.0434265	0.0322891	0.0484307
100.104	6.8125	0.125228	0.0766219	0.0761795	0.0853503	0.0559263	0.0505986	0.0461905	0.0337249	0.0554463
100.104	6.85417	0.150812	0.0936845	0.0904208	0.106737	0.0675099	0.0577816	0.0592854	0.0467086	0.0797233
100.104	6.89583	0.147439	0.0920765	0.0853378	0.105426	0.0613233	0.0526449	0.0571421	0.047227	0.0813685
100.104	6.9375	0.193582	0.135025	0.126863	0.153639	0.0963899	0.0740857	0.0845853	0.0786339	0.115283
100.104	6.97917	0.207529	0.146426	0.138072	0.166217	0.107891	0.0813615	0.0947613	0.0878843	0.121742
100.104	7.02083	0.200447	0.140009	0.129089	0.156367	0.103534	0.0734892	0.0883408	0.0814037	0.107896
100.104	7.0625	0.164024	0.107035	0.09345	0.115649	0.0752593	0.0526818	0.0663929	0.0566819	0.0752786
100.104	7.10417	0.159033	0.0987302	0.0899373	0.107212	0.07161	0.0493797	0.0639734	0.0459906	0.0624845
100.104	7.14583	0.176264	0.111755	0.105032	0.121544	0.0828529	0.0553087	0.0763626	0.0480564	0.063049
100.104	7.1875	0.166517	0.106182	0.103033	0.115953	0.0683525	0.0447035	0.0632025	0.0442234	0.0589884
100.104	7.22917	0.160662	0.104327	0.10706	0.116019	0.0597125	0.0447009	0.059217	0.0420854	0.0581704
100.104	7.27083	0.145062	0.0934962	0.0970776	0.105163	0.0493962	0.039082	0.0511651	0.0346912	0.0547481
100.104	7.3125	0.143397	0.0923038	0.09722	0.103378	0.0489345	0.0363273	0.0468668	0.031786	0.0605618
100.104	7.35417	0.136743	0.0850825	0.0914732	0.0999515	0.0490657	0.0312628	0.037492	0.0241356	0.0555171
100.104	7.39583	0.13652	0.0858587	0.093526	0.10899	0.0543077	0.0323233	0.0300994	0.023558	0.0528257
100.104	7.4375	0.14931	0.10239	0.110749	0.125482	0.0642415	0.0381176	0.0314948	0.0324176	0.0676162
100.104	7.47917	0.172866	0.132543	0.137837	0.149167	0.0791927	0.0470837	0.0438271	0.0479013	0.090416
100.104	7.52083	0.18469	0.149623	0.154917	0.162809	0.0887731	0.0532331	0.0547273	0.0558636	0.0984117
100.104	7.5625	0.16792	0.1338	0.141048	0.14733	0.0741233	0.0430661	0.0405671	0.0383479	0.0768538
100.104	7.60417	0.148892	0.117351	0.120965	0.122051	0.0579479	0.0355746	0.0309447	0.025926	0.0604803
100.104	7.64583	0.176247	0.144942	0.146287	0.135849	0.0714002	0.0476185	0.0495424	0.0419872	0.080758
100.104	7.6875	0.207244	0.177049	0.173294	0.151657	0.0889892	0.0647541	0.0779569	0.0660254	0.106408
100.104	7.72917	0.234862	0.205049	0.198075	0.171916	0.107073	0.0906705	0.110132	0.0928553	0.131817
100.104	7.77083	0.247464	0.216709	0.208562	0.183806	0.117809	0.111748	0.131469	0.110072	0.14642
100.104	7.8125	0.249677	0.21833	0.209303	0.189546	0.123134	0.11375	0.136813	0.114352	0.15189
100.104	7.85417	0.24659	0.217831	0.20703	0.186625	0.128143	0.113694	0.135824	0.112428	0.148199
100.104	7.89583	0.224831	0.192696	0.182034	0.163102	0.113315	0.0973189	0.11895	0.0941119	0.12531
100.104	7.9375	0.221052	0.185026	0.175403	0.155919	0.111317	0.0937274	0.116252	0.0910576	0.117931
100.104	7.97917	0.229854	0.18846	0.179149	0.159184	0.117254	0.0977958	0.12036	0.0969315	0.120218
100.104	8.02083	0.242831	0.199644	0.188538	0.169116	0.129971	0.108343	0.1277	0.108059	0.131176
100.104	8.0625	0.271505	0.234072	0.217631	0.199179	0.16293	0.138461	0.150758	0.137721	0.166018
100.104	8.10417	0.289711	0.256316	0.234924	0.220978	0.186014	0.160298	0.170592	0.163415	0.193773
100.104	8.14583	0.279639	0.246317	0.225981	0.208855	0.170924	0.146753	0.151694	0.149849	0.184268
100.104	8.1875	0.257668	0.222092	0.208027	0.186017	0.144964	0.124147	0.123952	0.124708	0.160628
100.104	8.22917	0.239083	0.203471	0.196054	0.17154	0.133963	0.115306	0.108272	0.10999	0.146585
100.104	8.27083	0.22669	0.193826	0.195042	0.172727	0.13842	0.116477	0.10402	0.109453	0.143299
100.104	8.3125	0.226444	0.196776	0.204042	0.189926	0.157193	0.127277	0.110798	0.120929	0.151634
100.104	8.35417	0.225773	0.197519	0.206164	0.196256	0.165708	0.131414	0.113716	0.12512	0.157395
100.104	8.39583	0.208606	0.177589	0.182039	0.171356	0.139775	0.108178	0.100042	0.108002	0.135966
100.146	13.4792	0.213412	0.18745	0.190966	0.193525	0.166393	0.134428	0.118969	0.126963	0.154591
100.146	13.5208	0.214906	0.164156	0.159425	0.207868	0.22597	0.0841144	0.0302621	0.0325112	0.0521676
100.146	13.5625	0.17274	0.120257	0.120143	0.176676	0.19637	0.0540346	0.0163912	0.0184435	0.031683
100.146	13.6042	0.153841	0.101929	0.0998307	0.163453	0.17926	0.0448409	0.0135408	0.0147373	0.027992
100.146	13.6458	0.165488	0.113307	0.106906	0.175831	0.184939	0.0467202	0.0147405	0.0170213	0.0346846
100.146	13.6875	0.197206	0.142416	0.134575	0.205375	0.209013	0.0543415	0.0175565	0.0252081	0.0501814
100.146	13.7292	0.211311	0.152326	0.142105	0.212795	0.212041	0.0536637	0.0172055	0.0289988	0.0556851
100.146	13.7708	0.182241	0.122121	0.113827	0.186031	0.183481	0.0359829	0.0111317	0.0198634	0.0358155
100.146	13.8125	0.18491	0.125665	0.118246	0.190117	0.182334	0.0378936	0.0127533	0.0194507	0.0331321
100.146	13.8542	0.212245	0.154526	0.149821	0.217049	0.204437	0.0579807	0.0219351	0.0291827	0.0450929
100.146	13.8958	0.218166	0.164061	0.160925	0.222751	0.214188	0.0678562	0.0248365	0.0325186	0.0514878
100.146	13.9375	0.201493	0.154215	0.148692	0.207603	0.209543	0.0680088	0.0230878	0.0250897	0.0530548
100.146	13.9792	0.211245	0.165012	0.165157	0.219645	0.221006	0.086805	0.035576	0.026489	0.055665
100.146	14.0208	0.199186	0.151573	0.156577	0.212155	0.210131	0.0841783	0.0369563	0.0220943	0.0415927
100.146	14.0625	0.219412	0.168877	0.174593	0.229887	0.229331	0.102939	0.0542806	0.032918	0.0471983
100.146	14.1042	0.21204	0.164149	0.170715	0.223769	0.222648	0.10815	0.0594704	0.035428	0.0439642
100.146	14.1458	0.212036	0.164515	0.173011	0.22143	0.220313	0.115023	0.064146	0.0388627	0.048989
100.146	14.1875	0.241505	0.192009	0.201386	0.24461	0.24352	0.145708	0.0881688	0.0541159	0.0679259
100.146	14.2292	0.243431	0.19526	0.206001	0.247973	0.242374	0.15185	0.0957801	0.0592785	0.0720217
100.146	14.2708	0.219068	0.175004	0.182816	0.222028	0.216338	0.132697	0.0826578	0.0506929	0.0590563
100.146	14.3125	0.203567	0.162956	0.167398	0.203022	0.196622	0.122157	0.0787465	0.0460948	0.0500768
100.146	14.3542	0.199949	0.159972	0.163023	0.195028	0.188592	0.122372	0.0857135	0.0453533	0.0463645
100.146	14.3958	0.20867	0.16781	0.170627	0.198791	0.19474	0.13375	0.104396	0.0523953	0.0478747
100.146	14.4375	0.241319	0.202628	0.205014	0.224313	0.225412	0.170488	0.146572	0.0815633	0.0693088
100.146	14.4792	0.252191	0.212342	0.213799	0.229145	0.228575	0.185574	0.169412	0.0934585	0.0792928
100.146	14.5208	0.21168	0.168934	0.165491	0.184274	0.188682	0.146516	0.129802	0.0566877	0.0474011
100.146	14.5625	0.209846	0.17073	0.162725	0.177973	0.190709	0.152059	0.1338	0.0502377	0.0477874
100.146	14.6042	0.216334	0.181549	0.169149	0.186129	0.20111	0.164986	0.146167	0.0483408	0.0474786
100.146	14.6458	0.232031	0.198152	0.186359	0.208815	0.220639	0.185894	0.166348	0.0600182	0.049942
100.146	14.6875	0.244748	0.212256	0.203839	0.228946	0.238596	0.204919	0.182195	0.0743019	0.0533094
100.146	14.7292	0.225669	0.191503	0.186841	0.210425	0.219248	0.181573	0.155179	0.0550439	0.0377308
100.146	14.7708	0.212162	0.176865	0.17659	0.199862	0.206947	0.165614	0.134811	0.042882	0.0285246
100.146	14.8125	0.211246	0.178015	0.177409	0.202831	0.207666	0.162215	0.127309	0.038791	0.0275491
100.146	14.8542	0.225432	0.197638	0.193584	0.220561	0.222563	0.172302	0.133292	0.0444862	0.0363773
100.146	14.8958	0.234861	0.20988	0.202211	0.229277	0.229785	0.17562	0.131355	0.0479322	0.0422748
100.146	14.9375	0.227434	0.202082	0.188212	0.213078	0.215471	0.157374	0.109692	0.0344544	0.0309162
100.146	14.9792	0.212278	0.187446	0.173327	0.202499	0.199929	0.136266	0.0903141	0.0264069	0.0282091
100.146	15.0208	0.211742	0.184269	0.177225	0.210518	0.200454	0.13231	0.0876361	0.0292761	0.0345427
100.146	15.0625	0.224351	0.194339	0.19163	0.228221	0.212712	0.142895	0.101434	0.0394662	0.0457964
100.146	15.1042	0.205737	0.17304	0.175495	0.220955	0.204509	0.133822	0.0997511	0.0328612	0.0329762
100.146	15.1458	0.185373	0.155285	0.165303	0.21366	0.202279	0.126383	0.101377	0.0238464	0.0209196
100.146	15.1875	0.160198	0.139538	0.155392	0.203726	0.196731	0.114107	0.0934234	0.02408	0.0186632
100.146	15.2292	0.155195	0.1314	0.150962	0.199997	0.198866	0.123237	0.106379	0.0307604	0.0254318
100.146	15.2708	0.166819	0.128957	0.146599	0.205165	0.204618	0.135588	0.123751	0.0438552	0.0409997
100.146	15.3125	0.209403	0.162653	0.175885	0.236008	0.23183	0.174593	0.16768	0.0841845	0.083146
100.146	15.3542	0.220907	0.17431	0.185806	0.245023	0.240778	0.198778	0.200009	0.117251	0.119767
100.146	15.3958	0.225002	0.18227	0.192845	0.255988	0.249931	0.224229	0.234035	0.163773	0.160615
100.146	15.4375	0.23655	0.18827	0.203371	0.266655	0.266982	0.249109	0.261639	0.20604	0.198913
100.146	15.4792	0.227236	0.177755	0.200656	0.264524	0.266198	0.246414	0.261293	0.210534	0.205892
100.146	15.5208	0.24345	0.201992	0.229396	0.279186	0.281376	0.267029	0.281704	0.249428	0.250364
100.146	15.5625	0.274901	0.237104	0.260909	0.300583	0.306215	0.292487	0.306472	0.290871	0.299169
100.146	15.6042	0.265681	0.227688	0.24338	0.284967	0.288791	0.271101	0.287056	0.27085	0.282554
100.146	15.6458	0.277575	0.238568	0.249422	0.283021	0.285598	0.268134	0.280311	0.265636	0.279095
100.146	15.6875	0.298465	0.258777	0.265215	0.294333	0.296712	0.277689	0.286735	0.274635	0.287918
100.146	15.7292	0.317498	0.281319	0.282403	0.307166	0.307927	0.290306	0.295967	0.286039	0.298192
100.146	15.7708	0.316447	0.289392	0.289305	0.304828	0.304515	0.294051	0.298589	0.282944	0.293955
100.146	15.8125	0.318597	0.297469	0.295316	0.306983	0.304756	0.301044	0.303329	0.283031	0.293864
100.146	15.8542	0.322971	0.310646	0.306281	0.315494	0.312889	0.315394	0.316515	0.293687	0.302634
100.146	15.8958	0.325826	0.326518	0.321719	0.328545	0.327877	0.333965	0.332786	0.308845	0.31653
100.146	15.9375	0.319982	0.323207	0.319203	0.326857	0.324508	0.332764	0.328802	0.302529	0.314018
100.146	15.9792	0.281099	0.296871	0.301177	0.301451	0.298547	0.310306	0.299007	0.271235	0.291488
100.146	16.0208	0.233259	0.269427	0.287595	0.278331	0.276953	0.293248	0.271452	0.244915	0.272518
100.146	16.0625	0.18082	0.249829	0.282618	0.266752	0.268155	0.288461	0.259678	0.233577	0.265827
100.146	16.1042	0.156304	0.247642	0.282014	0.263318	0.266924	0.291381	0.257208	0.230176	0.267154
100.146	16.1458	0.140455	0.236577	0.274669	0.251431	0.252909	0.292149	0.255307	0.226866	0.263329
100.146	16.1875	0.122701	0.183837	0.228615	0.198136	0.218505	0.2683	0.219057	0.186778	0.233885
100.146	16.2292	0.0836985	0.121096	0.184154	0.157336	0.193223	0.2536	0.197071	0.158867	0.212302
100.146	16.2708	0.0570512	0.0742511	0.151585	0.133436	0.176928	0.250031	0.190247	0.148962	0.200558
100.146	16.3125	0.0352257	0.0427904	0.122966	0.108619	0.157066	0.245834	0.185317	0.146326	0.189739
100.146	16.3542	0.0277428	0.0340043	0.115262	0.101782	0.147969	0.240833	0.181428	0.145239	0.182098
100.146	16.3958	0.0353671	0.0457378	0.136464	0.116074	0.154772	0.239452	0.18059	0.147698	0.182404
100.146	16.4375	0.0459275	0.0672726	0.163097	0.137272	0.171442	0.248566	0.191239	0.158704	0.191022
100.146	16.4792	0.0653541	0.107735	0.204504	0.171761	0.200302	0.269416	0.215177	0.181367	0.211429
100.146	16.5208	0.104071	0.169843	0.25799	0.222543	0.242367	0.296093	0.248572	0.216301	0.243002
100.146	16.5625	0.108268	0.202381	0.282651	0.245136	0.259885	0.305931	0.260192	0.2291	0.253459
100.146	16.6042	0.0736536	0.204589	0.288289	0.248317	0.262236	0.307008	0.255929	0.220936	0.246604
100.146	16.6458	0.0670834	0.186637	0.276444	0.236889	0.249667	0.298826	0.24615	0.206504	0.231128
100.146	16.6875	0.0556825	0.175542	0.271752	0.237404	0.247057	0.297475	0.249976	0.205687	0.229785
100.146	16.7292	0.0498524	0.155826	0.264825	0.234947	0.24202	0.293328	0.248248	0.200435	0.22322
100.146	16.7708	0.0422081	0.138017	0.261763	0.237903	0.24559	0.293759	0.25148	0.201313	0.221047
100.146	16.8125	0.0320812	0.11978	0.25899	0.242406	0.252586	0.297741	0.256868	0.204907	0.222144
100.146	16.8542	0.0288187	0.124281	0.260126	0.239952	0.24809	0.293152	0.245809	0.189119	0.195722
100.146	16.8958	0.0328542	0.14593	0.273817	0.250593	0.255847	0.295861	0.244976	0.181332	0.18171
100.146	16.9375	0.0535602	0.175932	0.292476	0.270327	0.273103	0.304703	0.251166	0.178929	0.181286
100.146	16.9792	0.0804003	0.206822	0.30748	0.290978	0.292141	0.311771	0.253362	0.173642	0.180682
100.146	17.0208	0.13401	0.243372	0.319062	0.320223	0.314775	0.323191	0.263648	0.180921	0.191268
100.146	17.0625	0.155766	0.241577	0.313269	0.31672	0.310673	0.317955	0.249907	0.162568	0.172075
100.146	17.1042	0.192718	0.243521	0.3072	0.308012	0.303955	0.311266	0.234751	0.142819	0.150784
100.146	17.1458	0.233906	0.258282	0.307472	0.30577	0.304317	0.311091	0.230686	0.135318	0.146078
100.146	17.1875	0.25785	0.271205	0.309523	0.304004	0.305122	0.310757	0.230495	0.133601	0.144678
100.146	17.2292	0.274273	0.284196	0.316649	0.304791	0.309274	0.31328	0.237233	0.136769	0.147409
100.146	17.2708	0.260197	0.274241	0.315421	0.294878	0.303414	0.30856	0.230596	0.126932	0.136872
100.146	17.3125	0.21769	0.244117	0.305571	0.274164	0.287827	0.298178	0.212783	0.106125	0.11588
100.146	17.3542	0.172024	0.211661	0.291715	0.258812	0.274918	0.292128	0.19248	0.0881746	0.0947218
100.146	17.3958	0.179446	0.224237	0.302493	0.2851	0.299259	0.315485	0.218871	0.109011	0.108005
100.146	17.4375	0.164426	0.210028	0.294268	0.276762	0.295576	0.312616	0.214366	0.0991519	0.0855277
100.146	17.4792	0.140793	0.176156	0.270867	0.245795	0.271892	0.293873	0.192026	0.0741823	0.0485756
100.146	17.5208	0.151169	0.17437	0.263733	0.242517	0.266763	0.294145	0.193801	0.0764692	0.0527697
100.146	17.5625	0.148051	0.168934	0.25515	0.239816	0.258897	0.286076	0.190533	0.072202	0.0575143
100.146	17.6042	0.138462	0.155972	0.239294	0.228261	0.244399	0.273473	0.182916	0.0643042	0.0602206
100.146	17.6458	0.15891	0.17527	0.251874	0.243964	0.258704	0.283369	0.207616	0.0870291	0.0865807
100.146	17.6875	0.168488	0.183982	0.255354	0.245266	0.260654	0.289135	0.218401	0.107142	0.104952
100.146	17.7292	0.197795	0.213101	0.273281	0.259416	0.272925	0.30278	0.242082	0.130495	0.122845
100.146	17.7708	0.211711	0.224839	0.27836	0.255115	0.26503	0.306313	0.248759	0.141772	0.123973
100.146	17.8125	0.210674	0.222254	0.277733	0.250748	0.258148	0.302704	0.245223	0.142114	0.122424
100.146	17.8542	0.190341	0.202111	0.26449	0.234195	0.243277	0.284933	0.223894	0.125915	0.111048
100.146	17.8958	0.192468	0.201867	0.265659	0.235965	0.246982	0.283785	0.22126	0.125374	0.116218
100.146	17.9375	0.187287	0.19506	0.256325	0.225251	0.237531	0.276685	0.214579	0.123777	0.119438
100.146	17.9792	0.198823	0.206611	0.258529	0.227207	0.243233	0.279717	0.227659	0.14155	0.139543
100.146	18.0208	0.214691	0.224425	0.265156	0.23126	0.25001	0.286219	0.245162	0.166238	0.166254
100.146	18.0625	0.216327	0.226484	0.263269	0.21849	0.237015	0.280675	0.244143	0.173906	0.181418
100.146	18.1042	0.213827	0.224034	0.266073	0.213092	0.223913	0.276755	0.243012	0.178643	0.196853
100.146	18.1458	0.207294	0.219931	0.265563	0.203976	0.21441	0.270925	0.238463	0.180315	0.206998
100.146	18.1875	0.200353	0.215423	0.265269	0.198114	0.214608	0.269639	0.232578	0.180435	0.212457
100.146	18.2292	0.241963	0.253728	0.29302	0.239169	0.253117	0.294656	0.263169	0.225915	0.259119
100.146	18.2708	0.24043	0.25446	0.288974	0.23631	0.246087	0.285306	0.259831	0.228071	0.267222
100.146	18.3125	0.229589	0.242786	0.27701	0.224887	0.232693	0.27293	0.247382	0.217799	0.262805
100.146	18.3542	0.218407	0.230197	0.26283	0.210181	0.21929	0.260765	0.234511	0.207427	0.257486
100.146	18.3958	0.236462	0.243902	0.272753	0.229818	0.241585	0.273267	0.252587	0.23218	0.279342
100.146	18.4375	0.24687	0.252527	0.282926	0.248571	0.262536	0.288498	0.266463	0.253117	0.295974
100.146	18.4792	0.255743	0.2613	0.293527	0.261615	0.277226	0.299434	0.277909	0.269042	0.308106
100.146	18.5208	0.241173	0.25119	0.287996	0.244137	0.264267	0.292478	0.267171	0.260501	0.29726
100.146	18.5625	0.250485	0.260492	0.296392	0.250333	0.27167	0.299409	0.27375	0.267763	0.3016
100.146	18.6042	0.23691	0.243905	0.28624	0.228629	0.25398	0.286786	0.248903	0.24158	0.286232
100.146	18.6458	0.251804	0.254833	0.296691	0.239647	0.262428	0.293914	0.25024	0.24225	0.293397
100.146	18.6875	0.266317	0.265522	0.303356	0.250047	0.268147	0.300493	0.249673	0.243681	0.298961
100.146	18.7292	0.286821	0.285935	0.319653	0.271938	0.286162	0.316851	0.264702	0.263595	0.31565
100.146	18.7708	0.281105	0.281565	0.313745	0.259585	0.276362	0.31173	0.256711	0.254938	0.309067
100.146	18.8125	0.262222	0.262949	0.300404	0.239196	0.256833	0.298889	0.241264	0.23403	0.291323
100.146	18.8542	0.24994	0.250052	0.292397	0.227306	0.243293	0.292334	0.234726	0.221067	0.28038
100.146	18.8958	0.245939	0.246406	0.290486	0.223839	0.2387	0.29363	0.236936	0.219015	0.27724
100.146	18.9375	0.251008	0.250715	0.294067	0.226274	0.241241	0.301624	0.24627	0.2265	0.281768
100.146	18.9792	0.265831	0.262501	0.302506	0.235138	0.251186	0.313955	0.264358	0.242094	0.294071
100.146	19.0208	0.275681	0.271461	0.307499	0.241644	0.257835	0.320366	0.276135	0.251907	0.304034
100.146	19.0625	0.245027	0.245954	0.284527	0.207362	0.228095	0.300058	0.252391	0.222659	0.277046
100.146	19.1042	0.213098	0.21786	0.261826	0.169986	0.195883	0.277397	0.225929	0.194253	0.250416
100.146	19.1458	0.195061	0.200257	0.250538	0.145856	0.1713	0.260934	0.21028	0.180125	0.236013
100.146	19.1875	0.196981	0.201069	0.252052	0.144404	0.164022	0.257725	0.211628	0.184053	0.236903
100.146	19.2292	0.218742	0.21721	0.264314	0.166203	0.178172	0.268167	0.227522	0.203352	0.251444
100.146	19.2708	0.222818	0.219273	0.267773	0.174035	0.181592	0.270692	0.230936	0.206557	0.252496
100.146	19.3125	0.226969	0.223806	0.272957	0.182238	0.188749	0.273477	0.236411	0.210992	0.254297
100.146	19.3542	0.192149	0.194183	0.250139	0.151829	0.159554	0.249035	0.209637	0.181177	0.228037
100.146	19.3958	0.196326	0.199748	0.252392	0.158805	0.168504	0.252555	0.221712	0.196228	0.239224
100.146	19.4375	0.220965	0.227304	0.270928	0.194538	0.204281	0.275386	0.25483	0.237925	0.272555
100.146	19.4792	0.232069	0.24339	0.281413	0.214362	0.224498	0.290337	0.275733	0.260892	0.287574
100.146	19.5208	0.243469	0.254892	0.293791	0.231022	0.244528	0.30082	0.2946	0.278269	0.298442
100.146	19.5625	0.245148	0.251287	0.288417	0.230984	0.244181	0.299622	0.297663	0.281683	0.299884
100.146	19.6042	0.257813	0.260799	0.292109	0.241562	0.255143	0.308338	0.307838	0.294623	0.309197
100.146	19.6458	0.273914	0.275928	0.305321	0.257836	0.270914	0.32312	0.323184	0.311172	0.321338
100.146	19.6875	0.2828	0.28619	0.319005	0.27119	0.282964	0.33591	0.337858	0.322554	0.32729
100.146	19.7292	0.299506	0.302853	0.333793	0.295948	0.300592	0.344352	0.348436	0.33576	0.339499
100.146	19.7708	0.283803	0.289341	0.326147	0.285243	0.287451	0.33712	0.342185	0.326335	0.330573
100.146	19.8125	0.275745	0.279926	0.320648	0.279771	0.28007	0.332824	0.337823	0.318053	0.321069
100.146	19.8542	0.266543	0.268388	0.310853	0.271483	0.275295	0.327661	0.326427	0.300091	0.30271
100.146	19.8958	0.282198	0.281162	0.319065	0.284889	0.292607	0.33118	0.324903	0.298841	0.306217
100.146	19.9375	0.285344	0.282735	0.318858	0.284327	0.295919	0.329233	0.319329	0.293088	0.306181
100.146	19.9792	0.264657	0.260237	0.30107	0.264253	0.275213	0.317158	0.306243	0.281534	0.30117
100.146	20.0208	0.258517	0.252785	0.296962	0.258133	0.267287	0.315194	0.302562	0.281358	0.303843
100.146	20.0625	0.263984	0.259906	0.304816	0.269506	0.273802	0.323134	0.306275	0.284275	0.308198
100.146	20.1042	0.285279	0.284264	0.323791	0.297354	0.298428	0.341607	0.325974	0.296397	0.321205
100.146	20.1458	0.265011	0.261684	0.300518	0.267978	0.268071	0.317919	0.299078	0.258902	0.2905
100.146	20.1875	0.252396	0.245228	0.278927	0.244593	0.241789	0.293853	0.269051	0.224299	0.261485
100.146	20.2292	0.251812	0.237858	0.267894	0.233236	0.228641	0.278703	0.246428	0.202298	0.241129
100.146	20.2708	0.261372	0.240849	0.266126	0.233335	0.22955	0.276687	0.237339	0.193735	0.233314
100.146	20.3125	0.274749	0.251414	0.269172	0.240456	0.237958	0.28249	0.238694	0.196878	0.236644
100.146	20.3542	0.289827	0.267394	0.278448	0.253462	0.24906	0.289842	0.245529	0.204358	0.244839
100.146	20.3958	0.274485	0.252197	0.262196	0.229827	0.220883	0.26023	0.218262	0.170757	0.216091
100.146	20.4375	0.264776	0.242155	0.254724	0.218077	0.199115	0.236065	0.196486	0.145368	0.197501
100.146	20.4792	0.262082	0.239994	0.254473	0.218668	0.190655	0.222757	0.186999	0.137388	0.19097
100.146	6.47917	0.268394	0.249017	0.260963	0.229323	0.20002	0.221239	0.189816	0.146189	0.196112
100.146	6.52083	0.185358	0.132659	0.129334	0.135564	0.123887	0.117935	0.132896	0.119786	0.143447
100.146	6.5625	0.152956	0.103204	0.100705	0.105167	0.0969797	0.0859666	0.103714	0.0865561	0.104554
100.146	6.60417	0.150998	0.104103	0.10234	0.105983	0.0943878	0.0812475	0.101954	0.0794015	0.0984991
100.146	6.64583	0.123566	0.0807882	0.0845362	0.09128	0.0744292	0.0658651	0.0817494	0.0495478	0.0679931
100.146	6.6875	0.111115	0.0714664	0.078881	0.087906	0.0671151	0.0593562	0.0695255	0.0351015	0.0537723
100.146	6.72917	0.115929	0.0767837	0.084649	0.0897671	0.0652206	0.0535057	0.0613851	0.0358827	0.0532899
100.146	6.77083	0.113838	0.0726597	0.0768647	0.0821176	0.0548462	0.0406974	0.047075	0.0330503	0.0447468
100.146	6.8125	0.135609	0.0867523	0.0846779	0.0933261	0.0591477	0.0441459	0.0505336	0.0399791	0.0548227
100.146	6.85417	0.10612	0.0596775	0.0545424	0.0660175	0.0399234	0.0297453	0.0325004	0.0240628	0.0397124
100.146	6.89583	0.151186	0.0936741	0.0850058	0.100182	0.0600409	0.0478782	0.0584043	0.0438017	0.0715194
100.146	6.9375	0.177421	0.117402	0.105894	0.124232	0.0735437	0.0595657	0.0771747	0.0639471	0.0965037
100.146	6.97917	0.18304	0.1235	0.111176	0.130878	0.0741976	0.0610418	0.0811874	0.0711876	0.102808
100.146	7.02083	0.203619	0.139514	0.124431	0.153028	0.096815	0.0775934	0.0919996	0.0866195	0.121273
100.146	7.0625	0.205493	0.140253	0.123241	0.152485	0.101776	0.0778447	0.0939823	0.087407	0.117085
100.146	7.10417	0.186498	0.122063	0.104901	0.127526	0.0864452	0.0606288	0.0817602	0.0698428	0.0913059
100.146	7.14583	0.18435	0.118743	0.105272	0.123405	0.0849228	0.0567986	0.0838303	0.0592353	0.0769333
100.146	7.1875	0.176013	0.111038	0.0993596	0.117743	0.0758244	0.048602	0.0756595	0.0478444	0.064587
100.146	7.22917	0.15619	0.0962029	0.0875736	0.103104	0.0573762	0.0363015	0.0537544	0.0374015	0.0547026
100.146	7.27083	0.153144	0.0972527	0.092642	0.105336	0.0536175	0.0412343	0.0530733	0.0367194	0.0560468
100.146	7.3125	0.180901	0.126454	0.13004	0.139927	0.0759204	0.0681295	0.073407	0.0496245	0.0740787
100.146	7.35417	0.183684	0.127663	0.13477	0.14629	0.0811991	0.0690809	0.071571	0.0528521	0.0837694
100.146	7.39583	0.171203	0.111945	0.122478	0.135773	0.0751638	0.0559838	0.0586191	0.0392539	0.0717331
100.146	7.4375	0.140386	0.0835958	0.0942086	0.110948	0.0601291	0.0377008	0.0400004	0.0250901	0.0532802
100.146	7.47917	0.144781	0.0945514	0.100374	0.118342	0.0638147	0.040221	0.0416697	0.0336773	0.0638237
100.146	7.52083	0.159235	0.118739	0.119853	0.133502	0.0733932	0.0485144	0.0540939	0.0457999	0.0789002
100.146	7.5625	0.160889	0.124665	0.127559	0.13515	0.07436	0.0488453	0.0564606	0.0454513	0.0792493
100.146	7.60417	0.162242	0.130397	0.131561	0.135803	0.0725446	0.0461353	0.0525021	0.0392486	0.0728967
100.146	7.64583	0.161213	0.132877	0.130776	0.126348	0.0675295	0.0439562	0.0490769	0.0340659	0.0673917
100.146	7.6875	0.168768	0.140307	0.133962	0.120071	0.0663023	0.0457738	0.0530947	0.0366946	0.0712232
100.146	7.72917	0.197854	0.165934	0.157417	0.135981	0.0803059	0.0621813	0.0768358	0.057276	0.0982515
100.146	7.77083	0.232806	0.198397	0.188815	0.165005	0.103606	0.0926158	0.110889	0.0907972	0.131646
100.146	7.8125	0.265046	0.232172	0.221758	0.200581	0.134264	0.128715	0.147471	0.127733	0.166175
100.146	7.85417	0.258309	0.226447	0.214441	0.192561	0.132757	0.123823	0.144358	0.123523	0.163123
100.146	7.89583	0.239435	0.207785	0.19479	0.17302	0.122639	0.108774	0.128618	0.106198	0.14439
100.146	7.9375	0.229709	0.19699	0.182965	0.162218	0.11974	0.101734	0.121296	0.0979121	0.131205
100.146	7.97917	0.225318	0.18914	0.175492	0.155075	0.117525	0.0969069	0.117538	0.0943197	0.122367
100.146	8.02083	0.231836	0.190957	0.177148	0.158098	0.122797	0.0996438	0.120969	0.0997186	0.123997
100.146	8.0625	0.240972	0.198648	0.183719	0.166495	0.132685	0.108306	0.127212	0.108979	0.133746
100.146	8.10417	0.265229	0.228472	0.209405	0.193761	0.160617	0.135033	0.148128	0.135704	0.166612
100.146	8.14583	0.276853	0.243228	0.221832	0.208723	0.17484	0.14928	0.159118	0.153426	0.18591
100.146	8.1875	0.268024	0.233704	0.218743	0.202284	0.165489	0.144058	0.151582	0.148125	0.178592
100.146	8.22917	0.251351	0.215409	0.20551	0.189548	0.154398	0.137371	0.140412	0.135732	0.165009
100.146	8.27083	0.238969	0.201572	0.194083	0.18007	0.148645	0.131505	0.127776	0.122287	0.153576
100.146	8.3125	0.229765	0.193026	0.191312	0.181865	0.152101	0.132084	0.122802	0.120287	0.149662
100.146	8.35417	0.228531	0.196919	0.200308	0.197743	0.167909	0.140381	0.126531	0.131379	0.158117
100.188	13.4792	0.187194	0.130609	0.126714	0.181091	0.201632	0.0640704	0.0199364	0.0205405	0.0327742
100.188	13.5208	0.161085	0.110139	0.109805	0.168381	0.188218	0.0468655	0.0138578	0.0136678	0.0251281
100.188	13.5625	0.141419	0.0901951	0.0899433	0.151409	0.169745	0.0376873	0.0124492	0.0107556	0.0243879
100.188	13.6042	0.146465	0.0946972	0.0931368	0.156626	0.171888	0.0365873	0.011936	0.0110119	0.0232509
100.188	13.6458	0.182369	0.120375	0.114869	0.183677	0.193167	0.0436289	0.0142295	0.015595	0.0312837
100.188	13.6875	0.211815	0.140106	0.125447	0.194665	0.198539	0.0465071	0.0156215	0.0232073	0.0420737
100.188	13.7292	0.210172	0.136536	0.126325	0.196862	0.195775	0.0426743	0.0145212	0.0207661	0.0384764
100.188	13.7708	0.183146	0.118505	0.111221	0.18221	0.176747	0.0317678	0.0114322	0.0161508	0.0287697
100.188	13.8125	0.17102	0.111546	0.106769	0.174824	0.162953	0.0282531	0.00962351	0.0141303	0.0259807
100.188	13.8542	0.203118	0.141309	0.140569	0.204456	0.197514	0.0430465	0.0180619	0.0218133	0.0411557
100.188	13.8958	0.181094	0.123811	0.12081	0.185238	0.187613	0.0412588	0.0162336	0.0157813	0.0357146
100.188	13.9375	0.174519	0.124854	0.129187	0.187609	0.187814	0.0530152	0.0193786	0.0143354	0.031415
100.188	13.9792	0.231548	0.17573	0.187315	0.239597	0.238892	0.102168	0.0508904	0.0330959	0.0538417
100.188	14.0208	0.23264	0.177785	0.189727	0.23828	0.241105	0.112682	0.0583771	0.0365513	0.0516477
100.188	14.0625	0.20396	0.152415	0.166973	0.211374	0.215873	0.099049	0.0474081	0.0259323	0.0363678
100.188	14.1042	0.207526	0.158839	0.170518	0.212528	0.217679	0.107307	0.0531367	0.0302324	0.0419733
100.188	14.1458	0.228229	0.178527	0.188619	0.22961	0.232026	0.126334	0.0687272	0.0416231	0.0554336
100.188	14.1875	0.253244	0.202596	0.213736	0.251418	0.248815	0.149595	0.0888504	0.0546441	0.0704937
100.188	14.2292	0.230866	0.184277	0.191861	0.227391	0.225839	0.134091	0.0787854	0.0487466	0.0597479
100.188	14.2708	0.217068	0.172911	0.177237	0.210667	0.210363	0.127914	0.0782189	0.0470613	0.0532229
100.188	14.3125	0.216073	0.170462	0.173054	0.204815	0.206482	0.13176	0.087737	0.0506157	0.053277
100.188	14.3542	0.215061	0.167723	0.170767	0.201277	0.201569	0.134025	0.0984904	0.0538223	0.0512942
100.188	14.3958	0.207661	0.15877	0.162222	0.192392	0.185119	0.128114	0.105912	0.0520181	0.044003
100.188	14.4375	0.224072	0.177718	0.179832	0.203758	0.194495	0.145319	0.13135	0.0649105	0.0533793
100.188	14.4792	0.204838	0.159492	0.158572	0.1793	0.179532	0.130778	0.113971	0.0498132	0.0433288
100.188	14.5208	0.198051	0.158272	0.15257	0.167885	0.177208	0.129461	0.108402	0.0396142	0.0371928
100.188	14.5625	0.210111	0.174006	0.165853	0.182362	0.194134	0.147466	0.124168	0.0425487	0.0373212
100.188	14.6042	0.225802	0.190444	0.183604	0.204691	0.214071	0.171558	0.147011	0.0546685	0.0409946
100.188	14.6458	0.226073	0.190889	0.18627	0.211014	0.219551	0.180964	0.156456	0.0557188	0.0405948
100.188	14.6875	0.222677	0.186238	0.181837	0.208149	0.215619	0.170679	0.135385	0.0479134	0.0381823
100.188	14.7292	0.193708	0.157245	0.158548	0.183156	0.189991	0.139733	0.101174	0.0301336	0.023657
100.188	14.7708	0.175115	0.140375	0.144188	0.169291	0.175253	0.121572	0.080175	0.0215597	0.0176643
100.188	14.8125	0.177303	0.14674	0.146075	0.175274	0.1802	0.121295	0.0758337	0.0201595	0.0189367
100.188	14.8542	0.201826	0.178061	0.171327	0.202928	0.206198	0.140317	0.0893555	0.02815	0.0288543
100.188	14.8958	0.194398	0.170666	0.159372	0.186188	0.191288	0.12291	0.0694693	0.0201279	0.0203819
100.188	14.9375	0.206791	0.185958	0.174018	0.189992	0.19251	0.12308	0.0678629	0.0184369	0.0186891
100.188	14.9792	0.205526	0.185746	0.179869	0.198298	0.193051	0.117599	0.066111	0.0202513	0.0233962
100.188	15.0208	0.196856	0.17488	0.174423	0.201267	0.191389	0.11105	0.0673398	0.0234258	0.0243865
100.188	15.0625	0.182264	0.157388	0.158427	0.19924	0.187802	0.106053	0.0706651	0.0204455	0.0171479
100.188	15.1042	0.17381	0.15462	0.160853	0.208694	0.197938	0.116923	0.0862749	0.0183316	0.0145626
100.188	15.1458	0.185355	0.172541	0.181189	0.232672	0.226516	0.147604	0.115353	0.0351012	0.0241017
100.188	15.1875	0.155015	0.1337	0.147061	0.205796	0.199133	0.122816	0.104024	0.0291427	0.0225721
100.188	15.2292	0.178146	0.139682	0.156222	0.219395	0.212351	0.145141	0.126907	0.0477474	0.0453835
100.188	15.2708	0.213376	0.167998	0.181719	0.251605	0.239215	0.177961	0.163334	0.0854221	0.0958625
100.188	15.3125	0.233038	0.197007	0.200892	0.26439	0.255392	0.2135	0.211186	0.136526	0.14352
100.188	15.3542	0.211536	0.168776	0.182478	0.249058	0.240669	0.202126	0.210696	0.145584	0.150937
100.188	15.3958	0.222635	0.176997	0.194502	0.262075	0.259779	0.23217	0.245034	0.195139	0.195969
100.188	15.4375	0.222754	0.178942	0.199374	0.26859	0.269885	0.247621	0.261766	0.221146	0.223694
100.188	15.4792	0.234323	0.18794	0.209911	0.272146	0.273923	0.256177	0.273755	0.247364	0.254688
100.188	15.5208	0.273428	0.230696	0.249904	0.299854	0.301881	0.286182	0.306151	0.29656	0.309967
100.188	15.5625	0.275675	0.232606	0.244301	0.290491	0.292257	0.275581	0.294524	0.285693	0.300258
100.188	15.6042	0.279106	0.235465	0.24194	0.277805	0.277278	0.26422	0.277797	0.266989	0.282376
100.188	15.6458	0.287608	0.24318	0.245751	0.276833	0.274985	0.26029	0.270803	0.258491	0.272297
100.188	15.6875	0.314437	0.276842	0.275099	0.299058	0.301222	0.284799	0.28965	0.279949	0.292257
100.188	15.7292	0.307389	0.269562	0.26565	0.288223	0.284719	0.273895	0.277727	0.259538	0.272328
100.188	15.7708	0.313603	0.285009	0.278845	0.294765	0.289585	0.287225	0.288061	0.264072	0.27724
100.188	15.8125	0.320206	0.303024	0.292499	0.305192	0.301115	0.303011	0.302321	0.274877	0.286724
100.188	15.8542	0.323582	0.325425	0.31905	0.325958	0.325056	0.330457	0.32798	0.303831	0.311476
100.188	15.8958	0.303814	0.320093	0.31897	0.323201	0.323105	0.330698	0.325464	0.296198	0.306981
100.188	15.9375	0.259111	0.295121	0.303609	0.30252	0.301302	0.311024	0.298046	0.266743	0.287465
100.188	15.9792	0.202828	0.267525	0.294324	0.285334	0.284733	0.298415	0.275114	0.245083	0.273988
100.188	16.0208	0.155463	0.247914	0.287697	0.270737	0.269993	0.291691	0.259266	0.226582	0.261541
100.188	16.0625	0.104562	0.240104	0.289723	0.271677	0.2689	0.296619	0.260417	0.227424	0.264412
100.188	16.1042	0.0965928	0.24251	0.286537	0.267963	0.264769	0.300081	0.259162	0.227747	0.26612
100.188	16.1458	0.0971899	0.200464	0.239169	0.209373	0.222129	0.271554	0.220335	0.184566	0.232235
100.188	16.1875	0.0772692	0.13843	0.187249	0.149416	0.181144	0.245331	0.187063	0.146057	0.198819
100.188	16.2292	0.0558884	0.0833999	0.14324	0.105407	0.150496	0.230198	0.168103	0.125907	0.174987
100.188	16.2708	0.035973	0.0481136	0.114523	0.0835543	0.134496	0.227692	0.164884	0.126189	0.167985
100.188	16.3125	0.0327366	0.0442073	0.113274	0.0802768	0.125184	0.219697	0.155895	0.120457	0.156855
100.188	16.3542	0.0418688	0.0613124	0.136818	0.0968241	0.132686	0.218924	0.155548	0.123258	0.157005
100.188	16.3958	0.0505945	0.0851996	0.169443	0.127276	0.15913	0.236633	0.174251	0.143644	0.177728
100.188	16.4375	0.0604825	0.121418	0.215586	0.173607	0.201601	0.268596	0.210561	0.180736	0.213501
100.188	16.4792	0.0664361	0.182722	0.274695	0.237299	0.257913	0.306893	0.261486	0.233792	0.260939
100.188	16.5208	0.0655225	0.229875	0.309593	0.275357	0.287638	0.325252	0.283616	0.259722	0.283346
100.188	16.5625	0.0556689	0.211523	0.296021	0.259354	0.274086	0.314757	0.268245	0.238853	0.264375
100.188	16.6042	0.048521	0.185865	0.277481	0.239559	0.255181	0.302441	0.25337	0.21725	0.243916
100.188	16.6458	0.042684	0.161593	0.262592	0.224826	0.239198	0.292618	0.244567	0.201292	0.228687
100.188	16.6875	0.0381771	0.140899	0.254217	0.218689	0.23066	0.287532	0.24256	0.194068	0.219236
100.188	16.7292	0.0327762	0.123944	0.251179	0.220625	0.231837	0.288694	0.246575	0.196576	0.217073
100.188	16.7708	0.0247656	0.105952	0.247196	0.223916	0.236123	0.293195	0.251594	0.200991	0.218314
100.188	16.8125	0.0242738	0.116142	0.260541	0.238096	0.250369	0.300978	0.260244	0.207033	0.218126
100.188	16.8542	0.0272281	0.13758	0.275529	0.248634	0.258808	0.303357	0.260104	0.200203	0.204461
100.188	16.8958	0.0421246	0.166513	0.293929	0.270182	0.277591	0.311041	0.265022	0.198054	0.20287
100.188	16.9375	0.0708744	0.201489	0.302788	0.286712	0.288275	0.307855	0.254633	0.181661	0.190189
100.188	16.9792	0.157507	0.242807	0.313526	0.31029	0.30689	0.317585	0.256052	0.181706	0.193754
100.188	17.0208	0.194512	0.25339	0.31319	0.314353	0.310692	0.319746	0.248346	0.171328	0.182553
100.188	17.0625	0.210008	0.250104	0.306009	0.304082	0.301779	0.311663	0.231799	0.147302	0.155612
100.188	17.1042	0.240197	0.261424	0.305368	0.303377	0.303099	0.311629	0.232762	0.140909	0.149207
100.188	17.1458	0.271202	0.281387	0.313635	0.311751	0.314708	0.319134	0.248591	0.15366	0.160244
100.188	17.1875	0.294038	0.299691	0.326848	0.32375	0.328746	0.330571	0.266087	0.170453	0.176495
100.188	17.2292	0.255279	0.271945	0.317167	0.303571	0.311421	0.316581	0.240324	0.141	0.145691
100.188	17.2708	0.190701	0.226335	0.299947	0.274305	0.289559	0.300397	0.216069	0.111169	0.115653
100.188	17.3125	0.130249	0.181773	0.280623	0.253016	0.274116	0.291782	0.198094	0.0916735	0.0940103
100.188	17.3542	0.109201	0.164751	0.274646	0.256186	0.279423	0.300023	0.202683	0.0951975	0.0894587
100.188	17.3958	0.120014	0.170417	0.274279	0.256218	0.280386	0.301687	0.203586	0.0928543	0.0776631
100.188	17.4375	0.127976	0.168213	0.268716	0.246999	0.274374	0.298047	0.199334	0.084454	0.0649534
100.188	17.4792	0.132819	0.160771	0.25668	0.23796	0.26637	0.294603	0.195937	0.0817235	0.0641072
100.188	17.5208	0.134293	0.158674	0.249155	0.235189	0.257898	0.288659	0.192874	0.0804989	0.0709257
100.188	17.5625	0.144361	0.168472	0.254296	0.246422	0.262399	0.290002	0.206834	0.0886836	0.0897749
100.188	17.6042	0.1515	0.172842	0.254592	0.249226	0.26343	0.290277	0.217701	0.0998329	0.104614
100.188	17.6458	0.169606	0.189117	0.260918	0.250857	0.266992	0.294291	0.229076	0.109318	0.109976
100.188	17.6875	0.185629	0.20535	0.265736	0.247919	0.264809	0.298827	0.235563	0.117619	0.112213
100.188	17.7292	0.181521	0.199032	0.256214	0.225711	0.239774	0.288236	0.221606	0.114851	0.0996954
100.188	17.7708	0.180554	0.195842	0.255707	0.221046	0.232019	0.283219	0.217055	0.115056	0.0974397
100.188	17.8125	0.177402	0.191436	0.256172	0.221901	0.232359	0.279271	0.214055	0.114609	0.0995738
100.188	17.8542	0.185299	0.195977	0.261289	0.230136	0.242718	0.281972	0.216682	0.11878	0.109448
100.188	17.8958	0.206651	0.214884	0.274108	0.246372	0.261246	0.293146	0.229323	0.132397	0.129222
100.188	17.9375	0.213593	0.221987	0.272322	0.245425	0.262407	0.293332	0.238685	0.147288	0.144841
100.188	17.9792	0.225189	0.234931	0.275741	0.246757	0.265485	0.297548	0.254414	0.169382	0.169103
100.188	18.0208	0.203534	0.215702	0.253774	0.213883	0.235839	0.277524	0.231583	0.156094	0.160714
100.188	18.0625	0.205568	0.216908	0.253868	0.204429	0.223704	0.271427	0.229601	0.164959	0.178317
100.188	18.1042	0.225009	0.234119	0.274879	0.224053	0.234203	0.282169	0.247428	0.193581	0.215545
100.188	18.1458	0.215048	0.226098	0.273248	0.212233	0.228116	0.277516	0.235948	0.188218	0.215517
100.188	18.1875	0.22047	0.234498	0.280675	0.215316	0.234834	0.278513	0.23617	0.195533	0.230059
100.188	18.2292	0.236562	0.25148	0.286697	0.228028	0.242855	0.276873	0.246671	0.210876	0.254571
100.188	18.2708	0.254014	0.26344	0.290646	0.243847	0.254574	0.281474	0.260618	0.228588	0.275168
100.188	18.3125	0.263827	0.268999	0.292321	0.253171	0.262529	0.287625	0.268792	0.241108	0.287606
100.188	18.3542	0.263443	0.266392	0.290749	0.258971	0.268433	0.293164	0.271569	0.250393	0.294407
100.188	18.3958	0.264244	0.266358	0.293976	0.269251	0.279532	0.302192	0.27737	0.262573	0.303615
100.188	18.4375	0.244647	0.247916	0.283118	0.249717	0.264135	0.290958	0.26223	0.249484	0.289866
100.188	18.4792	0.243018	0.248098	0.285573	0.246507	0.264398	0.292037	0.264346	0.253144	0.289541
100.188	18.5208	0.253148	0.260107	0.296742	0.256423	0.276655	0.302296	0.276389	0.265741	0.299306
100.188	18.5625	0.234076	0.23914	0.281663	0.231926	0.256916	0.29031	0.251525	0.240359	0.282422
100.188	18.6042	0.244752	0.245509	0.287478	0.236571	0.260286	0.293861	0.248796	0.237148	0.285632
100.188	18.6458	0.266989	0.264609	0.303291	0.255118	0.274754	0.305394	0.258268	0.249388	0.298181
100.188	18.6875	0.289652	0.288376	0.32248	0.27617	0.29198	0.321001	0.274277	0.268824	0.315779
100.188	18.7292	0.28039	0.282113	0.31495	0.264189	0.281229	0.31213	0.257249	0.250319	0.305161
100.188	18.7708	0.261511	0.263903	0.301994	0.245719	0.265088	0.300118	0.241203	0.228393	0.28794
100.188	18.8125	0.24969	0.250848	0.29409	0.234879	0.254319	0.294675	0.233797	0.214565	0.277475
100.188	18.8542	0.245824	0.246795	0.291485	0.2308	0.24949	0.29639	0.235444	0.211237	0.273821
100.188	18.8958	0.252271	0.252501	0.295536	0.233565	0.252083	0.305224	0.246779	0.219655	0.279397
100.188	18.9375	0.265764	0.263875	0.303936	0.240664	0.26056	0.316791	0.265067	0.235286	0.291833
100.188	18.9792	0.275908	0.271205	0.308391	0.244267	0.263785	0.323348	0.279232	0.251308	0.304042
100.188	19.0208	0.250825	0.251785	0.290613	0.217479	0.239875	0.307677	0.261477	0.231013	0.283143
100.188	19.0625	0.22197	0.227187	0.270221	0.185134	0.213121	0.290725	0.242211	0.207793	0.260192
100.188	19.1042	0.207751	0.21233	0.2604	0.164508	0.194061	0.279933	0.232558	0.198524	0.248882
100.188	19.1458	0.212885	0.215131	0.263798	0.16588	0.191101	0.280129	0.237726	0.206468	0.252096
100.188	19.1875	0.235365	0.234083	0.27768	0.186571	0.20578	0.289971	0.254374	0.227854	0.267156
100.188	19.2292	0.264922	0.25931	0.298672	0.21786	0.23314	0.307751	0.278075	0.255899	0.289274
100.188	19.2708	0.233112	0.23179	0.279245	0.191825	0.20416	0.285638	0.249039	0.227509	0.266219
100.188	19.3125	0.212493	0.216812	0.268637	0.180526	0.192969	0.272194	0.23599	0.216434	0.257006
100.188	19.3542	0.184097	0.195145	0.250783	0.15967	0.174508	0.261655	0.22427	0.199014	0.239091
100.188	19.3958	0.204739	0.219503	0.266542	0.188472	0.203925	0.279729	0.253956	0.232678	0.267447
100.188	19.4375	0.229151	0.247049	0.287441	0.222482	0.233515	0.300607	0.281408	0.267543	0.292795
100.188	19.4792	0.255531	0.267066	0.303081	0.248764	0.25882	0.311473	0.303603	0.292152	0.313245
100.188	19.5208	0.263472	0.269693	0.30082	0.252053	0.262034	0.312413	0.309611	0.298855	0.315495
100.188	19.5625	0.255945	0.263631	0.296188	0.244416	0.255795	0.313991	0.311158	0.296934	0.308262
100.188	19.6042	0.267265	0.273775	0.305803	0.256862	0.266922	0.323308	0.322334	0.30956	0.316601
100.188	19.6458	0.28455	0.289464	0.322439	0.279247	0.285078	0.335818	0.337353	0.326034	0.329592
100.188	19.6875	0.279844	0.28328	0.319442	0.276554	0.282463	0.337216	0.337244	0.320215	0.323527
100.188	19.7292	0.268686	0.274007	0.314632	0.272428	0.27546	0.332665	0.331298	0.312869	0.31606
100.188	19.7708	0.258511	0.263498	0.309602	0.267369	0.267366	0.327832	0.324203	0.301951	0.304125
100.188	19.8125	0.260653	0.261295	0.308279	0.268639	0.269707	0.325834	0.318332	0.292761	0.296951
100.188	19.8542	0.277596	0.273689	0.31483	0.280459	0.286808	0.330744	0.317741	0.292784	0.303039
100.188	19.8958	0.274871	0.270908	0.304669	0.267694	0.278826	0.323491	0.305	0.276077	0.292971
100.188	19.9375	0.267708	0.263007	0.297853	0.258819	0.269893	0.316177	0.294912	0.265553	0.289214
100.188	19.9792	0.262603	0.25773	0.296651	0.256449	0.265694	0.313762	0.289976	0.264763	0.292353
100.188	20.0208	0.266871	0.261702	0.300508	0.263883	0.269498	0.31889	0.291588	0.267772	0.296084
100.188	20.0625	0.268173	0.265363	0.302759	0.268617	0.269457	0.319021	0.293014	0.262903	0.293691
100.188	20.1042	0.256577	0.252309	0.288978	0.250905	0.249445	0.302442	0.273257	0.235501	0.271675
100.188	20.1458	0.24022	0.235228	0.26589	0.224564	0.218836	0.27347	0.238112	0.196157	0.238559
100.188	20.1875	0.242296	0.231413	0.256353	0.21509	0.20623	0.257113	0.214479	0.172933	0.219301
100.188	20.2292	0.251366	0.234426	0.253336	0.213277	0.205295	0.250896	0.201056	0.160414	0.207609
100.188	20.2708	0.266626	0.246505	0.257574	0.221967	0.216834	0.256723	0.204247	0.164376	0.210191
100.188	20.3125	0.271825	0.251212	0.256767	0.221117	0.214203	0.250341	0.199753	0.156039	0.202984
100.188	20.3542	0.264988	0.245573	0.250876	0.206195	0.192126	0.227597	0.182951	0.13221	0.180984
100.188	20.3958	0.261223	0.243772	0.251498	0.201047	0.175929	0.211584	0.172815	0.118912	0.168698
100.188	20.4375	0.260133	0.24135	0.253133	0.204618	0.165219	0.201117	0.166381	0.11163	0.162713
100.188	20.4792	0.264656	0.244888	0.258285	0.217441	0.173119	0.201349	0.168077	0.11405	0.163212
100.188	20.5208	0.261663	0.238073	0.25036	0.213569	0.166493	0.191992	0.159616	0.109109	0.155689
100.188	20.5625	0.250863	0.22491	0.234592	0.200652	0.153337	0.17616	0.144468	0.10091	0.144525
100.188	20.6042	0.247961	0.220691	0.227783	0.195674	0.155818	0.172791	0.139829	0.105786	0.150259
100.188	6.72917	0.104227	0.0627168	0.0599057	0.0711041	0.0544774	0.0368993	0.0521221	0.0383833	0.0460354
100.188	6.77083	0.127472	0.0770598	0.0723526	0.0844207	0.0560034	0.0397879	0.0595243	0.0459985	0.0527185
100.188	6.8125	0.130089	0.0780922	0.0698822	0.0803689	0.0494575	0.0356419	0.0568054	0.0424618	0.054901
100.188	6.85417	0.14309	0.0888043	0.0778797	0.0871309	0.0527862	0.0380376	0.0648996	0.0466937	0.0649545
100.188	6.89583	0.159149	0.100991	0.0885534	0.0974875	0.0585583	0.0445983	0.0749514	0.0552096	0.0805457
100.188	6.9375	0.151672	0.0917553	0.0786955	0.0883192	0.0525505	0.042836	0.0647926	0.0503813	0.0840171
100.188	6.97917	0.159418	0.0969258	0.0798615	0.0962258	0.0570145	0.0483803	0.0657606	0.0585872	0.0920765
100.188	7.02083	0.178955	0.111807	0.0916114	0.116385	0.072335	0.0611363	0.0790037	0.0733429	0.10269
100.188	7.0625	0.196881	0.124408	0.106346	0.127945	0.0867196	0.0673378	0.0966845	0.0791252	0.104317
100.188	7.10417	0.197186	0.124651	0.109328	0.129337	0.0871408	0.0652828	0.0999645	0.0702159	0.0923592
100.188	7.14583	0.18095	0.111082	0.0953682	0.11588	0.0720086	0.0508853	0.0821942	0.0542804	0.0772459
100.188	7.1875	0.159362	0.0960926	0.0817561	0.100383	0.0562992	0.0414442	0.0601972	0.042196	0.0660784
100.188	7.22917	0.166841	0.107207	0.0970563	0.112543	0.0626211	0.0518972	0.0629183	0.0482776	0.071936
100.188	7.27083	0.185065	0.127133	0.125818	0.13871	0.0793007	0.072659	0.0749166	0.058996	0.0838051
100.188	7.3125	0.219084	0.157042	0.166282	0.179798	0.11412	0.100224	0.0935472	0.0789082	0.108546
100.188	7.35417	0.191872	0.128623	0.141757	0.157794	0.095723	0.0806365	0.0786509	0.0604577	0.0874039
100.188	7.39583	0.156297	0.0964841	0.108932	0.129316	0.0745574	0.0587047	0.0647021	0.0446491	0.0689437
100.188	7.4375	0.135404	0.0840528	0.0887191	0.110045	0.0609647	0.0465867	0.0548376	0.0356524	0.0594803
100.188	7.47917	0.155006	0.111198	0.110699	0.130524	0.0751783	0.0562957	0.0667679	0.047973	0.0734229
100.188	7.52083	0.167974	0.129583	0.129962	0.142699	0.0856647	0.0633001	0.0758146	0.0544813	0.080536
100.188	7.5625	0.159898	0.126772	0.124852	0.130091	0.0745328	0.0538715	0.0658142	0.0434178	0.0693079
100.188	7.72917	0.227068	0.192406	0.180764	0.161243	0.103778	0.0928217	0.111009	0.0879159	0.12413
100.188	7.77083	0.244297	0.209448	0.196723	0.180129	0.122492	0.110642	0.128337	0.10729	0.143496
100.188	7.8125	0.2439	0.210475	0.194637	0.177837	0.127921	0.112688	0.133304	0.112085	0.148451
100.188	7.85417	0.236563	0.205438	0.187324	0.170713	0.129219	0.1101	0.131169	0.109211	0.143991
100.188	7.89583	0.227139	0.195463	0.175952	0.160536	0.126809	0.104437	0.124894	0.102267	0.133525
100.188	7.9375	0.223673	0.189303	0.169642	0.155956	0.126547	0.101103	0.122189	0.100348	0.128011
100.188	7.97917	0.239495	0.201482	0.181122	0.169452	0.141856	0.112469	0.135132	0.115732	0.139955
100.188	8.02083	0.244001	0.204256	0.184297	0.174396	0.1466	0.116772	0.137303	0.119998	0.146113
100.188	8.0625	0.261666	0.224219	0.203242	0.195683	0.166843	0.136647	0.151519	0.141281	0.170992
100.188	8.10417	0.268428	0.231318	0.213929	0.20162	0.169098	0.140879	0.1512	0.147357	0.177538
100.188	8.14583	0.265861	0.22879	0.218227	0.199275	0.163229	0.138739	0.146586	0.147693	0.176305
100.188	8.1875	0.242235	0.205348	0.199709	0.182744	0.150542	0.132556	0.136574	0.131076	0.158054
100.188	8.22917	0.217528	0.180474	0.180246	0.169651	0.142688	0.127764	0.127768	0.118333	0.142004
100.188	8.27083	0.215955	0.179618	0.18303	0.18135	0.157921	0.136881	0.131669	0.124606	0.148722
100.188	8.3125	0.231632	0.200882	0.204194	0.209452	0.186076	0.157285	0.147317	0.146147	0.169216
100.188	8.35417	0.217277	0.195712	0.19937	0.209591	0.187338	0.154163	0.141201	0.14378	0.168489
100.188	8.39583	0.217515	0.19836	0.201578	0.210646	0.191076	0.156383	0.149742	0.144829	0.168356
100.188	8.4375	0.218125	0.197345	0.204698	0.208351	0.188887	0.157416	0.155486	0.1445	0.16541
100.188	8.47917	0.215973	0.190276	0.203967	0.200051	0.177376	0.151698	0.149473	0.136071	0.154335
100.229	13.4792	0.185854	0.118546	0.116702	0.178881	0.201998	0.0699489	0.0192014	0.0189611	0.0340513
100.229	13.5208	0.135857	0.0782135	0.0810204	0.140386	0.164999	0.0388974	0.0103166	0.00957595	0.0191861
100.229	13.5625	0.138465	0.0837731	0.0858188	0.14853	0.168914	0.036796	0.0116826	0.00900841	0.0233497
100.229	13.6042	0.130266	0.0791841	0.0827674	0.143816	0.160134	0.0306345	0.00874252	0.00732722	0.0163531
100.229	13.6458	0.162163	0.0985576	0.0968936	0.164506	0.17349	0.0353588	0.0106512	0.0100625	0.0215566
100.229	13.6875	0.202632	0.125883	0.112955	0.185844	0.185888	0.0380991	0.012914	0.0147593	0.0303563
100.229	13.7292	0.175355	0.0992131	0.0861792	0.157864	0.154339	0.0212942	0.00708446	0.00977983	0.0190833
100.229	13.7708	0.139996	0.0765254	0.0709982	0.138868	0.133658	0.0129431	0.00444006	0.00666365	0.0113966
100.229	13.8125	0.150435	0.086681	0.0805879	0.152907	0.143017	0.0123499	0.00504197	0.0084985	0.013184
100.229	13.8542	0.165177	0.0943784	0.095165	0.168142	0.162043	0.0150716	0.00759097	0.0108189	0.0222449
100.229	13.8958	0.172405	0.10028	0.105295	0.173763	0.175794	0.0296429	0.0121958	0.0130319	0.0275619
100.229	13.9375	0.186255	0.122043	0.132027	0.192323	0.193711	0.0477019	0.0194108	0.0159041	0.0320146
100.229	13.9792	0.226109	0.164005	0.178483	0.234707	0.234986	0.0947634	0.0470686	0.0316893	0.0473476
100.229	14.0208	0.210094	0.148693	0.170098	0.21788	0.220209	0.0939126	0.0428516	0.0246205	0.0353575
100.229	14.0625	0.214989	0.158358	0.17886	0.219004	0.224179	0.105415	0.0461047	0.0253159	0.0356463
100.229	14.1042	0.222059	0.169789	0.185196	0.223779	0.229204	0.11497	0.0521349	0.0295356	0.0411264
100.229	14.1458	0.240052	0.188694	0.200173	0.238071	0.240848	0.129809	0.0654616	0.039857	0.0539045
100.229	14.1875	0.265641	0.21457	0.22448	0.260424	0.258446	0.154003	0.0852957	0.0545428	0.0725251
100.229	14.2292	0.249517	0.201795	0.208322	0.2427	0.242183	0.144832	0.0798957	0.052586	0.0654563
100.229	14.2708	0.235917	0.189694	0.193844	0.227207	0.228708	0.139049	0.0796818	0.0520244	0.0599483
100.229	14.3125	0.214523	0.165707	0.170631	0.206442	0.204	0.12345	0.0724104	0.0419058	0.0475962
100.229	14.3542	0.20353	0.152096	0.15896	0.195645	0.186175	0.116818	0.078199	0.0387012	0.0395778
100.229	14.3958	0.207796	0.156123	0.162931	0.195603	0.17982	0.120308	0.0957779	0.0440977	0.0381994
100.229	14.4375	0.213488	0.164314	0.168309	0.195408	0.179484	0.125126	0.108628	0.0496967	0.0405826
100.229	14.4792	0.187395	0.143668	0.144403	0.166871	0.161078	0.105622	0.0860066	0.033491	0.0280295
100.229	14.5208	0.197935	0.161523	0.158517	0.178048	0.181185	0.122061	0.0957246	0.036307	0.0318742
100.229	14.5625	0.19134	0.157586	0.156155	0.171961	0.179936	0.125729	0.100209	0.033683	0.0267333
100.229	14.6042	0.182427	0.149035	0.150253	0.167398	0.176282	0.129924	0.109968	0.0302645	0.022045
100.229	14.6458	0.184488	0.150901	0.152716	0.175853	0.183295	0.139412	0.118643	0.0317672	0.0216605
100.229	14.6875	0.179087	0.143497	0.14563	0.171275	0.177514	0.127416	0.0945575	0.0261146	0.0199304
100.229	14.7292	0.178296	0.14131	0.144129	0.17179	0.178227	0.120427	0.0772973	0.0226711	0.0210161
100.229	14.7708	0.160789	0.12639	0.132582	0.160278	0.168075	0.102911	0.0571606	0.0159869	0.0171246
100.229	14.8125	0.141675	0.113087	0.118433	0.147097	0.156223	0.0869257	0.0428578	0.0110425	0.0136117
100.229	14.8542	0.153919	0.130471	0.129313	0.161432	0.171083	0.0942721	0.0446708	0.0122938	0.0166268
100.229	14.8958	0.16111	0.140312	0.135198	0.163188	0.17392	0.0929315	0.0408143	0.0120345	0.015886
100.229	14.9375	0.160778	0.142535	0.137927	0.153391	0.158234	0.0793453	0.0332362	0.00863933	0.0104768
100.229	14.9792	0.207565	0.193304	0.189073	0.200109	0.198591	0.116516	0.0583025	0.0165506	0.0185186
100.229	15.0208	0.189897	0.175533	0.17616	0.194525	0.191793	0.102628	0.0552182	0.0146502	0.014573
100.229	15.0625	0.178622	0.162212	0.164944	0.19984	0.194283	0.102305	0.0616949	0.0148358	0.0138544
100.229	15.1042	0.19645	0.17585	0.179229	0.228249	0.216239	0.130054	0.0887469	0.023956	0.0248665
100.229	15.1458	0.159688	0.147018	0.160579	0.212256	0.200191	0.116948	0.087844	0.02166	0.0182838
100.229	15.1875	0.182513	0.157679	0.175581	0.235026	0.225387	0.149432	0.131279	0.039249	0.0338104
100.229	15.2292	0.170545	0.14197	0.160467	0.223992	0.212813	0.143235	0.128175	0.0411663	0.0414791
100.229	15.2708	0.189529	0.157598	0.178	0.247251	0.233538	0.165403	0.153659	0.073242	0.0778292
100.229	15.3125	0.202166	0.173202	0.197421	0.260241	0.251753	0.202253	0.201096	0.135725	0.137356
100.229	15.3542	0.192957	0.16113	0.190474	0.251453	0.244561	0.201814	0.207959	0.153456	0.159651
100.229	15.3958	0.209465	0.169822	0.197011	0.261644	0.259609	0.224706	0.235231	0.193562	0.200719
100.229	15.4375	0.216387	0.174128	0.198897	0.26196	0.262659	0.236297	0.250754	0.214988	0.227035
100.229	15.4792	0.21982	0.176033	0.200202	0.26436	0.266811	0.238158	0.257714	0.234294	0.248048
100.229	15.5208	0.263378	0.219133	0.239567	0.287909	0.288358	0.270773	0.294401	0.284235	0.299019
100.229	15.5625	0.279423	0.233667	0.243438	0.28299	0.284854	0.271803	0.289729	0.281608	0.296899
100.229	15.6042	0.278747	0.230667	0.232563	0.265959	0.266941	0.257177	0.270758	0.258655	0.27364
100.229	15.6458	0.28544	0.236617	0.234188	0.264335	0.263725	0.252928	0.261987	0.24598	0.259911
100.229	15.6875	0.304532	0.261154	0.254773	0.28248	0.285075	0.268818	0.27163	0.256859	0.269448
100.229	15.7292	0.304276	0.26149	0.253569	0.279819	0.277389	0.266327	0.267498	0.245532	0.258782
100.229	15.7708	0.306899	0.273416	0.262929	0.283673	0.278725	0.27628	0.275763	0.247085	0.260995
100.229	15.8125	0.312432	0.29306	0.278307	0.294338	0.289585	0.291812	0.289539	0.25843	0.270511
100.229	15.8542	0.305823	0.30142	0.290721	0.298968	0.296258	0.301175	0.296463	0.259607	0.270642
100.229	15.8958	0.289112	0.303993	0.302911	0.303038	0.302652	0.309369	0.301877	0.25972	0.272843
100.229	15.9375	0.239905	0.274848	0.283579	0.27815	0.274515	0.287656	0.268743	0.222456	0.245708
100.229	15.9792	0.161751	0.2407	0.280365	0.270467	0.265334	0.282319	0.257627	0.216305	0.245672
100.229	16.0208	0.106031	0.219715	0.279321	0.26514	0.257605	0.280014	0.248415	0.209263	0.243045
100.229	16.0625	0.0781391	0.221988	0.287412	0.272895	0.262653	0.290515	0.254809	0.217169	0.252066
100.229	16.1042	0.0779407	0.228663	0.277121	0.254415	0.245366	0.285528	0.243592	0.206855	0.24629
100.229	16.1458	0.0838486	0.220725	0.253611	0.220575	0.220545	0.274556	0.224699	0.188289	0.232036
100.229	16.1875	0.0616393	0.169893	0.204962	0.157021	0.179969	0.249821	0.190722	0.150645	0.198211
100.229	16.2292	0.0512813	0.112181	0.162556	0.109968	0.152477	0.234811	0.17175	0.130664	0.177243
100.229	16.2708	0.0406392	0.0685456	0.133551	0.0884367	0.140143	0.232753	0.170745	0.131867	0.175561
100.229	16.3125	0.0417195	0.0740542	0.137934	0.0853926	0.128343	0.220283	0.153947	0.117637	0.159635
100.229	16.3542	0.0464459	0.097554	0.160613	0.102748	0.13515	0.219522	0.151282	0.119071	0.158576
100.229	16.3958	0.0485406	0.131021	0.199266	0.141516	0.169119	0.24229	0.175845	0.14438	0.182443
100.229	16.4375	0.0495861	0.174628	0.245424	0.192977	0.215705	0.275063	0.215154	0.184063	0.220085
100.229	16.4792	0.0634938	0.195563	0.270405	0.224095	0.239827	0.29262	0.23658	0.207063	0.239957
100.229	16.5208	0.0624222	0.222812	0.300938	0.263462	0.274015	0.316717	0.273873	0.250128	0.277147
100.229	16.5625	0.0593752	0.188035	0.279534	0.239965	0.253993	0.303692	0.254769	0.226436	0.254349
100.229	16.6042	0.0494657	0.162075	0.264693	0.22681	0.243021	0.298295	0.246201	0.213735	0.24181
100.229	16.6458	0.038896	0.136277	0.247042	0.208278	0.224903	0.287064	0.234906	0.193155	0.223687
100.229	16.6875	0.0357846	0.134752	0.251452	0.21411	0.230573	0.289584	0.245296	0.201838	0.227555
100.229	16.7292	0.0292933	0.117083	0.246292	0.212176	0.228914	0.289379	0.248253	0.202185	0.223007
100.229	16.7708	0.0220131	0.10079	0.242736	0.214643	0.232073	0.294374	0.254403	0.207306	0.224776
100.229	16.8125	0.0176514	0.0946686	0.247292	0.222942	0.241448	0.301652	0.262805	0.213794	0.228659
100.229	16.8542	0.0203842	0.110531	0.263006	0.232031	0.249095	0.303051	0.260703	0.203485	0.213505
100.229	16.8958	0.0310527	0.14293	0.282052	0.252054	0.263684	0.30292	0.257036	0.192117	0.2027
100.229	16.9375	0.089177	0.196512	0.298975	0.278182	0.280182	0.304616	0.251382	0.183676	0.196975
100.229	16.9792	0.184546	0.247754	0.314023	0.304694	0.302252	0.318501	0.253854	0.185113	0.199721
100.229	17.0208	0.239449	0.276152	0.321622	0.321873	0.320281	0.331544	0.262152	0.191412	0.20584
100.229	17.0625	0.243407	0.271822	0.314093	0.313222	0.313384	0.324397	0.251095	0.1729	0.186024
100.229	17.1042	0.253368	0.27251	0.309096	0.308257	0.310285	0.318465	0.246982	0.159888	0.169419
100.229	17.1458	0.260911	0.275224	0.309018	0.305776	0.309495	0.31307	0.244089	0.151651	0.157605
100.229	17.1875	0.271717	0.284129	0.317278	0.309049	0.312762	0.314502	0.242553	0.147658	0.15152
100.229	17.2292	0.212805	0.24603	0.307849	0.293995	0.302038	0.310325	0.236914	0.134033	0.138337
100.229	17.2708	0.133352	0.184075	0.284281	0.267003	0.283541	0.298374	0.218919	0.111974	0.11703
100.229	17.3125	0.0709835	0.128484	0.256685	0.238036	0.265108	0.287597	0.200013	0.0931092	0.09464
100.229	17.3542	0.0626671	0.120423	0.258475	0.245544	0.277162	0.301743	0.215341	0.105937	0.0999929
100.229	17.3958	0.0701515	0.117358	0.2454	0.230503	0.264106	0.293123	0.201432	0.0941032	0.0804723
100.229	17.4375	0.100859	0.140994	0.253646	0.23736	0.269911	0.298431	0.20535	0.093678	0.0806636
100.229	17.4792	0.129111	0.160573	0.259995	0.243516	0.275745	0.303558	0.210241	0.0958539	0.0887979
100.229	17.5208	0.14983	0.179319	0.269229	0.25677	0.279888	0.311129	0.223468	0.107393	0.106954
100.229	17.5625	0.149082	0.177809	0.266219	0.258325	0.275729	0.305674	0.227129	0.111991	0.118825
100.229	17.6042	0.146292	0.171766	0.255966	0.245854	0.262543	0.294255	0.22098	0.104571	0.110117
100.229	17.6458	0.152128	0.175491	0.248583	0.231286	0.251328	0.288515	0.216466	0.0990049	0.100616
100.229	17.6875	0.175013	0.196514	0.257649	0.234059	0.254908	0.296176	0.22735	0.107958	0.104502
100.229	17.7292	0.192076	0.207542	0.263401	0.233229	0.252106	0.299662	0.230066	0.11526	0.104202
100.229	17.7708	0.186606	0.200285	0.258551	0.225727	0.240866	0.290116	0.219614	0.11215	0.0988688
100.229	17.8125	0.179642	0.194464	0.256996	0.224963	0.237286	0.282386	0.215019	0.111589	0.0992707
100.229	17.8542	0.18798	0.20139	0.263155	0.234237	0.247461	0.284503	0.221216	0.119853	0.110821
100.229	17.8958	0.210073	0.219286	0.274735	0.249132	0.265942	0.295043	0.235955	0.136606	0.130629
100.229	17.9375	0.236649	0.246546	0.292259	0.269924	0.286894	0.311884	0.259127	0.166344	0.161179
100.229	17.9792	0.246486	0.257668	0.297271	0.27385	0.290797	0.317742	0.272703	0.188356	0.185635
100.229	18.0208	0.225593	0.238574	0.27605	0.246727	0.26772	0.301131	0.253381	0.17528	0.175965
100.229	18.0625	0.216117	0.229069	0.266178	0.230279	0.252118	0.290335	0.241008	0.173073	0.18101
100.229	18.1042	0.214954	0.224927	0.266292	0.220699	0.239016	0.28378	0.234493	0.176996	0.194578
100.229	18.1458	0.252652	0.258276	0.296625	0.25012	0.264929	0.302557	0.264319	0.220421	0.243165
100.229	18.1875	0.235268	0.247754	0.289522	0.231628	0.248562	0.287222	0.243244	0.204376	0.234971
100.229	18.2292	0.24252	0.257782	0.291867	0.236836	0.252589	0.282982	0.247235	0.212449	0.253079
100.229	18.2708	0.262928	0.270961	0.296561	0.253104	0.265287	0.288926	0.262205	0.229949	0.276494
100.229	18.3125	0.289951	0.291261	0.311443	0.279455	0.28834	0.307115	0.286164	0.259683	0.303644
100.229	18.3542	0.292069	0.292348	0.313171	0.288753	0.296566	0.316352	0.29175	0.271498	0.313166
100.229	18.3958	0.250605	0.254568	0.284315	0.249272	0.259428	0.291755	0.255116	0.236656	0.280753
100.229	18.4375	0.232439	0.236542	0.273651	0.231727	0.245959	0.281233	0.241987	0.226881	0.266471
100.229	18.4792	0.227528	0.231758	0.271237	0.226323	0.246542	0.281527	0.241595	0.22795	0.264822
100.229	18.5208	0.236708	0.242653	0.280737	0.239482	0.262588	0.29312	0.257528	0.243372	0.279957
100.229	18.5625	0.249584	0.254868	0.292483	0.2531	0.276495	0.304277	0.270131	0.256397	0.294538
100.229	18.6042	0.257563	0.258027	0.297326	0.254401	0.278041	0.307276	0.266714	0.252936	0.295397
100.229	18.6458	0.268946	0.26619	0.304933	0.258313	0.280428	0.310396	0.265701	0.251363	0.297553
100.229	18.6875	0.278968	0.277353	0.314606	0.263358	0.282415	0.314188	0.264774	0.251051	0.302555
100.229	18.7292	0.277925	0.27851	0.312167	0.260186	0.280308	0.308097	0.249955	0.234418	0.295026
100.229	18.7708	0.263061	0.26392	0.301518	0.2457	0.268816	0.297943	0.23217	0.211919	0.279099
100.229	18.8125	0.250446	0.250952	0.293135	0.234728	0.259598	0.292834	0.22349	0.195733	0.265936
100.229	18.8542	0.247308	0.247806	0.291343	0.231499	0.255761	0.29601	0.227027	0.191883	0.262401
100.229	18.8958	0.254225	0.253974	0.29702	0.235944	0.259491	0.305851	0.241931	0.201802	0.270261
100.229	18.9375	0.259176	0.256861	0.300019	0.236227	0.259638	0.312088	0.25366	0.214571	0.280024
100.229	18.9792	0.255696	0.253711	0.295691	0.227943	0.250805	0.309945	0.256346	0.222851	0.284438
100.229	19.0208	0.246232	0.248789	0.291363	0.219502	0.239511	0.302044	0.250835	0.22424	0.280758
100.229	19.0625	0.217294	0.221949	0.268367	0.183677	0.210114	0.282881	0.228072	0.196537	0.255295
100.229	19.1042	0.201878	0.205774	0.254491	0.157261	0.187681	0.270277	0.216479	0.183155	0.239629
100.229	19.1458	0.204346	0.206763	0.255815	0.153902	0.182961	0.270408	0.221805	0.188967	0.24142
100.229	19.1875	0.22514	0.226014	0.271119	0.17525	0.200954	0.282153	0.241339	0.214059	0.261243
100.229	19.2292	0.23811	0.237475	0.280891	0.191238	0.213757	0.289938	0.255002	0.230516	0.272502
100.229	19.2708	0.218675	0.222858	0.267642	0.178659	0.194989	0.276219	0.243515	0.217845	0.257271
100.229	19.3125	0.194269	0.20618	0.255024	0.162798	0.176952	0.259942	0.226104	0.202276	0.243517
100.229	19.3542	0.183452	0.199503	0.250416	0.16239	0.176868	0.257629	0.22737	0.203275	0.242417
100.229	19.3958	0.195157	0.212554	0.259552	0.182439	0.197916	0.272014	0.249275	0.227186	0.261255
100.229	19.4375	0.222652	0.239756	0.282447	0.216926	0.231356	0.295341	0.277806	0.263052	0.289827
100.229	19.4792	0.228755	0.243042	0.283496	0.222172	0.236269	0.30134	0.286316	0.270648	0.292366
100.229	19.5208	0.231007	0.243189	0.279734	0.219665	0.234117	0.299912	0.291055	0.272809	0.290703
100.229	19.5625	0.239073	0.252417	0.285808	0.227624	0.240091	0.30455	0.300165	0.283845	0.295726
100.229	19.6042	0.257575	0.269762	0.301599	0.249759	0.257075	0.316183	0.314174	0.302425	0.309565
100.229	19.6458	0.264813	0.274733	0.308069	0.262251	0.266633	0.322759	0.319791	0.307532	0.314093
100.229	19.6875	0.262031	0.268867	0.306467	0.262804	0.267338	0.325035	0.319116	0.302786	0.308735
100.229	19.7292	0.27418	0.27762	0.315836	0.280851	0.281777	0.334843	0.326719	0.310771	0.314792
100.229	19.7708	0.263793	0.267085	0.31055	0.274223	0.273555	0.329959	0.318742	0.298827	0.302856
100.229	19.8125	0.266587	0.266657	0.310663	0.274895	0.275727	0.328826	0.314823	0.291831	0.298358
100.229	19.8542	0.271502	0.269443	0.308159	0.271888	0.277035	0.327374	0.308063	0.282967	0.295635
100.229	19.8958	0.267497	0.265439	0.296482	0.25733	0.266634	0.319806	0.293084	0.263565	0.285254
100.229	19.9375	0.277407	0.272795	0.304201	0.262254	0.272739	0.319874	0.288761	0.259067	0.288157
100.229	19.9792	0.272691	0.269822	0.305258	0.263228	0.272592	0.31579	0.283252	0.259446	0.291197
100.229	20.0208	0.277104	0.270012	0.305146	0.266882	0.273239	0.317604	0.283167	0.261051	0.291853
100.229	20.0625	0.255728	0.252353	0.287336	0.244912	0.244398	0.293887	0.257679	0.229514	0.263802
100.229	20.1042	0.250025	0.246755	0.280002	0.233351	0.228776	0.281072	0.241091	0.20739	0.248344
100.229	20.1458	0.241765	0.239281	0.267125	0.217131	0.209303	0.261634	0.215701	0.179883	0.224769
100.229	20.1875	0.241296	0.235533	0.256233	0.207103	0.193911	0.242461	0.191435	0.153625	0.202944
100.229	20.2292	0.252138	0.239729	0.255279	0.207797	0.193323	0.235097	0.179933	0.142511	0.192809
100.229	20.2708	0.267961	0.251076	0.260062	0.217133	0.204528	0.240193	0.183111	0.146449	0.193625
100.229	20.3125	0.261107	0.244183	0.247734	0.201966	0.181551	0.216191	0.163742	0.121695	0.168643
100.229	20.3542	0.253197	0.238317	0.241333	0.189844	0.160012	0.192266	0.149362	0.100977	0.148927
100.229	20.3958	0.254588	0.242234	0.247457	0.191394	0.15421	0.184093	0.148895	0.0948803	0.14303
100.229	20.4375	0.261224	0.250753	0.257819	0.200915	0.156983	0.186485	0.15507	0.09825	0.144036
100.229	20.4792	0.26577	0.25237	0.261532	0.213613	0.162258	0.188746	0.156963	0.100559	0.14315
100.229	20.5208	0.265781	0.247596	0.256304	0.213472	0.158817	0.183754	0.15034	0.0990908	0.13924
100.229	20.5625	0.262429	0.242982	0.247372	0.204642	0.147217	0.173438	0.139655	0.0980832	0.138626
100.229	20.6042	0.259402	0.237135	0.237677	0.197514	0.145721	0.16501	0.13105	0.0992075	0.144679
100.229	20.6458	0.25052	0.222536	0.221888	0.187074	0.14622	0.154661	0.118201	0.0950533	0.14427
100.229	20.6875	0.251223	0.219395	0.215152	0.187101	0.153758	0.15505	0.117169	0.100229	0.148983
100.229	6.72917	0.12714	0.0809793	0.072365	0.0810313	0.0651132	0.0504889	0.0787262	0.0601429	0.0594968
100.229	6.77083	0.140998	0.0874321	0.0806147	0.0892091	0.0652298	0.0547049	0.0848855	0.0638636	0.063145
100.229	6.8125	0.176969	0.115109	0.105448	0.119998	0.0831345	0.0754105	0.107928	0.0832264	0.0868848
100.229	6.85417	0.176678	0.11466	0.100198	0.111387	0.0759222	0.0677656	0.102576	0.077518	0.0896583
100.229	6.89583	0.151644	0.0897854	0.0751438	0.0821452	0.0575426	0.045836	0.0778267	0.055635	0.0791336
100.229	6.9375	0.136779	0.0738807	0.0597757	0.0647489	0.046119	0.0340644	0.0606541	0.0419815	0.0725748
100.229	6.97917	0.147278	0.0785977	0.062083	0.0720949	0.0485944	0.0386171	0.0659225	0.0484064	0.0813373
100.229	7.02083	0.188415	0.109573	0.0892586	0.10998	0.0717805	0.0658003	0.100678	0.0783211	0.109698
100.229	7.0625	0.234103	0.149126	0.131381	0.157454	0.112354	0.104754	0.142745	0.11285	0.137194
100.229	7.10417	0.234055	0.151756	0.132784	0.157444	0.111383	0.100588	0.142206	0.108805	0.126713
100.229	7.14583	0.211944	0.131898	0.111596	0.135897	0.0884619	0.0787094	0.115981	0.0871422	0.106834
100.229	7.1875	0.195607	0.121597	0.102643	0.123628	0.0768745	0.070428	0.0964406	0.0752899	0.0967563
100.229	7.22917	0.190915	0.124263	0.109831	0.1264	0.077777	0.0728003	0.0872941	0.0735296	0.0953387
100.229	7.27083	0.184546	0.124759	0.119878	0.13426	0.0792571	0.0727559	0.0774737	0.065409	0.086557
100.229	7.3125	0.178791	0.124015	0.129004	0.145086	0.083641	0.0762692	0.0725647	0.057358	0.0802676
100.229	7.35417	0.17705	0.118395	0.129062	0.148293	0.0895877	0.0790219	0.0796554	0.0588873	0.0804552
100.229	7.39583	0.169832	0.11097	0.12295	0.147017	0.0923218	0.0803182	0.0868591	0.0640988	0.0864972
100.229	7.4375	0.161288	0.106427	0.114695	0.142255	0.0882869	0.074521	0.0861439	0.0618888	0.0834106
100.229	7.47917	0.17817	0.132203	0.136673	0.160331	0.104847	0.0836808	0.0990834	0.0741427	0.0949101
100.229	7.77083	0.222761	0.185694	0.171068	0.160193	0.109943	0.0943495	0.110648	0.0900645	0.122034
100.229	7.8125	0.220494	0.185312	0.167344	0.157116	0.11549	0.0976227	0.114662	0.0938953	0.125245
100.229	7.85417	0.231192	0.199164	0.177469	0.168175	0.133726	0.111813	0.130576	0.10984	0.139957
100.229	7.89583	0.247995	0.214256	0.190245	0.182717	0.154472	0.128966	0.149797	0.13192	0.158077
100.229	7.9375	0.242642	0.207091	0.183366	0.177706	0.154251	0.126056	0.147124	0.130595	0.153576
100.229	7.97917	0.244719	0.206783	0.184561	0.180534	0.15941	0.128201	0.148716	0.135011	0.156477
100.229	8.02083	0.250509	0.210197	0.189955	0.18765	0.166897	0.134994	0.152101	0.141994	0.164788
100.229	8.0625	0.248909	0.205926	0.189108	0.188183	0.165692	0.135407	0.14655	0.138778	0.164893
100.229	8.10417	0.267638	0.224984	0.210875	0.199947	0.173962	0.144393	0.150127	0.151483	0.176877
100.229	8.14583	0.275346	0.235593	0.224972	0.208062	0.177774	0.148812	0.154139	0.162238	0.186625
100.229	8.1875	0.237872	0.199579	0.19554	0.178811	0.152156	0.1309	0.134245	0.132115	0.156431
100.229	8.22917	0.221103	0.186744	0.18708	0.177261	0.153446	0.134495	0.13627	0.129464	0.148827
100.229	8.27083	0.235881	0.204838	0.206626	0.207755	0.184198	0.15916	0.158717	0.15361	0.172049
100.229	8.3125	0.224376	0.200526	0.205583	0.212502	0.194338	0.16288	0.157098	0.152997	0.173217
100.229	8.35417	0.233123	0.216024	0.221182	0.232599	0.214235	0.181658	0.170084	0.168222	0.191468
100.229	8.39583	0.219916	0.205365	0.213519	0.222055	0.205444	0.170353	0.162825	0.158494	0.178745
100.271	13.5625	0.107157	0.0558347	0.060562	0.117035	0.134396	0.0226592	0.00582224	0.00500407	0.0109453
100.271	13.6042	0.110165	0.057516	0.0637818	0.121329	0.134081	0.0212689	0.00545203	0.00488185	0.00940025
100.271	13.6458	0.124229	0.0665951	0.065532	0.127208	0.133287	0.0203863	0.00589874	0.00574405	0.0103594
100.271	13.6875	0.160702	0.0911349	0.0787443	0.147126	0.144534	0.0201108	0.00714017	0.00757481	0.0125559
100.271	13.7292	0.152788	0.0816832	0.0655944	0.139151	0.129055	0.0111423	0.00480958	0.00694109	0.00974819
100.271	13.7708	0.142338	0.0730791	0.0606887	0.134619	0.121575	0.00734962	0.00429419	0.00677578	0.0107367
100.271	13.8125	0.174895	0.095234	0.0826481	0.162232	0.147171	0.0091607	0.00637084	0.0107723	0.0198834
100.271	13.8542	0.165933	0.0942676	0.0904211	0.162031	0.15088	0.0100158	0.00776632	0.0130397	0.0210829
100.271	13.8958	0.175795	0.0985667	0.104588	0.177807	0.178266	0.0251343	0.0139738	0.0181596	0.0277044
100.271	13.9375	0.173251	0.107463	0.116966	0.185507	0.187375	0.0426374	0.0198857	0.0155135	0.0263882
100.271	13.9792	0.202429	0.136288	0.149836	0.213857	0.214964	0.0792919	0.0387551	0.0236492	0.0331003
100.271	14.0208	0.186592	0.119778	0.137545	0.194807	0.198415	0.0724392	0.0312911	0.0168655	0.0234749
100.271	14.0625	0.201229	0.135233	0.151615	0.204311	0.210495	0.0856145	0.0347496	0.0196154	0.0274511
100.271	14.1042	0.225671	0.163024	0.177381	0.224747	0.22964	0.107443	0.0453707	0.0274589	0.0381455
100.271	14.1458	0.267823	0.212891	0.222905	0.263188	0.264143	0.15015	0.0736775	0.0481344	0.0643779
100.271	14.1875	0.293525	0.245571	0.253215	0.28833	0.285779	0.18358	0.0984591	0.069781	0.0908255
100.271	14.2292	0.262286	0.211966	0.220195	0.255363	0.251857	0.14941	0.0737288	0.0508311	0.0674708
100.271	14.2708	0.234684	0.183372	0.192068	0.229304	0.223107	0.127295	0.0588566	0.0384658	0.0513653
100.271	14.3125	0.213473	0.160595	0.170043	0.21112	0.199976	0.114847	0.0550971	0.0322458	0.0406851
100.271	14.3542	0.205247	0.150488	0.160316	0.202375	0.185412	0.110982	0.0652652	0.0326763	0.0347765
100.271	14.3958	0.21268	0.159224	0.166116	0.203111	0.182228	0.116273	0.0850463	0.0398301	0.0351259
100.271	14.4375	0.215079	0.165834	0.167913	0.200257	0.181733	0.117711	0.0932298	0.0429949	0.0349872
100.271	14.4792	0.213236	0.171915	0.170235	0.201247	0.192579	0.121973	0.0920059	0.0429976	0.0346693
100.271	14.5208	0.184436	0.150466	0.150601	0.176507	0.175209	0.109101	0.0819972	0.0306521	0.0233722
100.271	14.5625	0.152668	0.124615	0.128454	0.146139	0.151665	0.0942906	0.0747482	0.0194364	0.015673
100.271	14.6042	0.140738	0.116007	0.121899	0.139305	0.146213	0.097073	0.084232	0.0167655	0.0126803
100.271	14.6458	0.128456	0.103842	0.110631	0.131941	0.135686	0.0895472	0.0777066	0.0146542	0.00949785
100.271	14.6875	0.133338	0.106936	0.113686	0.139829	0.144778	0.0899088	0.0646439	0.0137784	0.0100767
100.271	14.7292	0.129791	0.101963	0.10989	0.138383	0.143936	0.0815655	0.0479911	0.0114156	0.0104308
100.271	14.7708	0.131035	0.101797	0.111121	0.141079	0.148708	0.0777302	0.0378036	0.0101148	0.0128515
100.271	14.8125	0.129895	0.102004	0.112637	0.14278	0.153593	0.0735698	0.0307314	0.00871263	0.0155293
100.271	14.8542	0.120873	0.101265	0.10978	0.139785	0.153886	0.0668964	0.0249454	0.00692506	0.0140169
100.271	14.8958	0.131233	0.115174	0.119152	0.146243	0.162377	0.0699437	0.0239343	0.00743946	0.0146864
100.271	14.9375	0.146337	0.130321	0.134011	0.149548	0.160502	0.0723951	0.0248096	0.00729772	0.0120284
100.271	14.9792	0.158887	0.14664	0.150779	0.165936	0.169014	0.0802785	0.0328157	0.0088613	0.0117117
100.271	15.0208	0.15112	0.143421	0.148997	0.169413	0.163162	0.0741996	0.0385425	0.00855461	0.00927666
100.271	15.0625	0.174326	0.16435	0.167843	0.19817	0.184938	0.0935541	0.0590772	0.0127079	0.0121139
100.271	15.1042	0.173005	0.160361	0.164627	0.209471	0.190955	0.0995206	0.0683908	0.0171442	0.016739
100.271	15.1458	0.19664	0.171283	0.181079	0.23677	0.220292	0.131456	0.0949002	0.0343859	0.030422
100.271	15.1875	0.188216	0.165819	0.182855	0.236883	0.226154	0.149784	0.122194	0.0372237	0.0333527
100.271	15.2292	0.196497	0.170531	0.18885	0.240253	0.231389	0.162688	0.140716	0.0484623	0.0486857
100.271	15.2708	0.18041	0.155874	0.181459	0.247492	0.23597	0.166793	0.156459	0.0698739	0.0758769
100.271	15.3125	0.17956	0.157108	0.187546	0.253257	0.243154	0.181737	0.180531	0.10954	0.116419
100.271	15.3542	0.190719	0.163623	0.196942	0.256952	0.247945	0.200003	0.205458	0.155883	0.165209
100.271	15.3958	0.208635	0.170452	0.203902	0.263983	0.25939	0.218648	0.231003	0.195606	0.208395
100.271	15.4375	0.222625	0.186905	0.215717	0.267176	0.266779	0.234405	0.25062	0.222525	0.241326
100.271	15.4792	0.228626	0.18848	0.214432	0.260918	0.261751	0.239659	0.25988	0.236139	0.252213
100.271	15.5208	0.252882	0.206724	0.228348	0.272509	0.271299	0.255997	0.280692	0.262885	0.277229
100.271	15.5625	0.255215	0.206259	0.217725	0.259517	0.259117	0.243661	0.263295	0.245391	0.260443
100.271	15.6042	0.283018	0.233104	0.234406	0.267678	0.269791	0.257303	0.269189	0.252543	0.267511
100.271	15.6458	0.298047	0.252373	0.249225	0.271419	0.273399	0.26595	0.270861	0.252717	0.266749
100.271	15.6875	0.308267	0.261427	0.254339	0.280984	0.283634	0.27021	0.268931	0.247248	0.260673
100.271	15.7292	0.311215	0.26264	0.252131	0.281703	0.280719	0.267921	0.265392	0.237715	0.250582
100.271	15.7708	0.311803	0.270953	0.257228	0.284035	0.279609	0.273727	0.270116	0.236268	0.248734
100.271	15.8125	0.304445	0.279575	0.265823	0.286283	0.280218	0.280176	0.272036	0.231837	0.244133
100.271	15.8542	0.272126	0.282831	0.284689	0.292614	0.290067	0.294156	0.282119	0.236953	0.248578
100.271	15.8958	0.245095	0.28119	0.299599	0.298539	0.298421	0.304161	0.292356	0.245283	0.257453
100.271	15.9375	0.220547	0.265959	0.287322	0.280083	0.27457	0.28659	0.264976	0.212084	0.22975
100.271	15.9792	0.152056	0.235309	0.281916	0.273143	0.264958	0.28323	0.255406	0.20499	0.228048
100.271	16.0208	0.118221	0.222309	0.279465	0.267339	0.257381	0.279957	0.243824	0.194886	0.223521
100.271	16.0625	0.105686	0.213872	0.26092	0.236193	0.227723	0.261044	0.218976	0.170654	0.206068
100.271	16.1042	0.0918929	0.208773	0.244772	0.209224	0.203747	0.250307	0.202176	0.156991	0.197764
100.271	16.1458	0.0788829	0.207743	0.236625	0.195041	0.193996	0.252937	0.200733	0.157835	0.201368
100.271	16.1875	0.0708792	0.195312	0.223821	0.175602	0.185339	0.256312	0.200084	0.157571	0.201582
100.271	16.2292	0.0389949	0.137894	0.181119	0.126773	0.158453	0.24182	0.180385	0.139336	0.183379
100.271	16.2708	0.0380478	0.0881277	0.149176	0.100343	0.147832	0.239536	0.178622	0.140504	0.184025
100.271	16.3125	0.0381379	0.107413	0.16045	0.0968587	0.134663	0.224091	0.153979	0.117261	0.163017
100.271	16.3542	0.0381347	0.137972	0.188206	0.119152	0.145004	0.227654	0.151179	0.121217	0.165319
100.271	16.3958	0.0471898	0.174103	0.225178	0.159403	0.179518	0.249895	0.175181	0.146194	0.186398
100.271	16.4375	0.0446983	0.178576	0.238031	0.179999	0.195626	0.260007	0.194205	0.161997	0.20141
100.271	16.4792	0.0502215	0.190829	0.260494	0.211989	0.221855	0.281349	0.2267	0.194369	0.229433
100.271	16.5208	0.0599226	0.20215	0.277203	0.232707	0.240538	0.294422	0.247709	0.219112	0.253345
100.271	16.5625	0.0712313	0.196654	0.277247	0.234223	0.243495	0.295183	0.249779	0.222055	0.255978
100.271	16.6042	0.0539824	0.171098	0.262025	0.219174	0.231539	0.287427	0.240189	0.208704	0.244144
100.271	16.6458	0.0428181	0.148301	0.251947	0.210053	0.224839	0.285092	0.238524	0.202469	0.237094
100.271	16.6875	0.0338967	0.126436	0.244844	0.205346	0.223964	0.286824	0.242485	0.203516	0.232081
100.271	16.7292	0.0245658	0.10236	0.234605	0.200869	0.222727	0.2875	0.245455	0.205089	0.227431
100.271	16.7708	0.0173733	0.0879997	0.23009	0.201581	0.224435	0.290694	0.250458	0.208095	0.227884
100.271	16.8125	0.0114743	0.0752878	0.228252	0.205552	0.229075	0.296036	0.257858	0.213548	0.232269
100.271	16.8542	0.0136135	0.0867478	0.245123	0.217063	0.240324	0.299399	0.258651	0.206324	0.224295
100.271	16.8958	0.0335595	0.127565	0.27011	0.233882	0.250602	0.296912	0.248851	0.189368	0.208158
100.271	16.9375	0.11399	0.204385	0.303744	0.27722	0.281581	0.312498	0.26048	0.196742	0.214859
100.271	16.9792	0.19982	0.254653	0.317452	0.304226	0.302849	0.325053	0.262896	0.197111	0.214752
100.271	17.0208	0.247135	0.281886	0.322264	0.322652	0.322057	0.33475	0.26879	0.20122	0.221018
100.271	17.0625	0.222031	0.264608	0.309634	0.3067	0.306042	0.319307	0.23677	0.16521	0.18367
100.271	17.1042	0.208425	0.251087	0.298445	0.294745	0.294562	0.303787	0.221872	0.139984	0.154583
100.271	17.1458	0.219349	0.253736	0.299186	0.291807	0.29237	0.297506	0.220334	0.130522	0.140796
100.271	17.1875	0.245536	0.270069	0.310935	0.300339	0.300751	0.304148	0.231143	0.136316	0.143534
100.271	17.2292	0.174071	0.224811	0.300908	0.282344	0.288518	0.298501	0.226272	0.124581	0.132591
100.271	17.2708	0.0673887	0.122833	0.248685	0.234027	0.252926	0.277789	0.190035	0.093405	0.102748
100.271	17.3125	0.0300103	0.0813512	0.22467	0.216298	0.248117	0.280762	0.196591	0.0941996	0.0982346
100.271	17.3542	0.0405051	0.103416	0.257522	0.253224	0.287801	0.313178	0.245891	0.134275	0.128814
100.271	17.3958	0.0446706	0.0922106	0.234826	0.228831	0.266685	0.299557	0.223503	0.113511	0.103637
100.271	17.4375	0.0601606	0.0966715	0.220641	0.212425	0.25284	0.290026	0.204226	0.0995156	0.0899571
100.271	17.4792	0.112569	0.149626	0.25669	0.24665	0.27925	0.311098	0.22812	0.114382	0.113034
100.271	17.5208	0.165951	0.198937	0.287189	0.276439	0.298603	0.331145	0.254061	0.134919	0.138072
100.271	17.5625	0.157898	0.188495	0.27731	0.263818	0.284181	0.319282	0.242333	0.125091	0.129647
100.271	17.6042	0.152449	0.179693	0.263142	0.243873	0.265049	0.304509	0.227517	0.110421	0.112179
100.271	17.6458	0.183642	0.208864	0.274095	0.252749	0.273701	0.310493	0.244835	0.119171	0.117666
100.271	17.6875	0.191916	0.211163	0.269787	0.243693	0.267073	0.309517	0.241462	0.117744	0.11145
100.271	17.7292	0.240403	0.250316	0.299255	0.27527	0.294675	0.332441	0.274402	0.153428	0.138089
100.271	17.7708	0.243355	0.251167	0.2989	0.275782	0.292404	0.330666	0.272284	0.157573	0.141584
100.271	17.8125	0.213607	0.22487	0.278461	0.253567	0.268265	0.30657	0.243574	0.132586	0.120985
100.271	17.8542	0.2029	0.216484	0.271201	0.246385	0.260985	0.294358	0.234572	0.127514	0.119518
100.271	17.8958	0.215196	0.224949	0.276589	0.253836	0.270642	0.298187	0.243996	0.139203	0.132866
100.271	17.9375	0.233166	0.242323	0.289305	0.267863	0.284375	0.308961	0.260859	0.16153	0.155405
100.271	17.9792	0.252291	0.262756	0.304093	0.281995	0.296507	0.320624	0.276527	0.188142	0.182284
100.271	18.0208	0.235345	0.250082	0.289492	0.258897	0.277135	0.306789	0.257613	0.176708	0.175259
100.271	18.0625	0.22383	0.236907	0.275762	0.240851	0.260277	0.294736	0.241828	0.170917	0.176534
100.271	18.1042	0.224315	0.23301	0.273728	0.232528	0.250701	0.289754	0.234049	0.175385	0.190965
100.271	18.1458	0.240269	0.24484	0.286396	0.239656	0.254883	0.296903	0.243101	0.195075	0.219163
100.271	18.1875	0.237723	0.247218	0.288964	0.234475	0.249412	0.289455	0.237932	0.197929	0.228355
100.271	18.2292	0.252485	0.264449	0.297839	0.248619	0.261786	0.289483	0.252882	0.218357	0.256023
100.271	18.2708	0.267239	0.273722	0.300586	0.260671	0.271269	0.295422	0.264769	0.232989	0.275353
100.271	18.3125	0.279712	0.28173	0.30563	0.273664	0.283521	0.309839	0.274272	0.247041	0.288852
100.271	18.3542	0.295919	0.296838	0.317768	0.291556	0.300963	0.317483	0.292372	0.270088	0.31179
100.271	18.3958	0.261824	0.266553	0.293837	0.257299	0.269288	0.295733	0.261005	0.239222	0.282475
100.271	18.4375	0.252409	0.256211	0.287358	0.2467	0.261584	0.289181	0.253293	0.233158	0.271817
100.271	18.4792	0.254826	0.258173	0.289169	0.248803	0.269456	0.295458	0.259292	0.239692	0.275788
100.271	18.5208	0.257516	0.263089	0.293718	0.258028	0.280523	0.305226	0.270298	0.252351	0.287861
100.271	18.5625	0.273717	0.279025	0.309357	0.279433	0.299455	0.321297	0.291041	0.276318	0.31007
100.271	18.6042	0.268093	0.268996	0.304268	0.266801	0.290844	0.316618	0.278482	0.261474	0.30203
100.271	18.6458	0.269706	0.267617	0.304322	0.260537	0.284639	0.312492	0.268155	0.247898	0.297326
100.271	18.6875	0.281893	0.280304	0.316277	0.26979	0.288866	0.316221	0.265982	0.247842	0.300517
100.271	18.7292	0.273819	0.272411	0.307389	0.257916	0.280669	0.304547	0.242134	0.217074	0.283096
100.271	18.7708	0.275134	0.272892	0.307318	0.258185	0.280444	0.304111	0.23366	0.205075	0.277543
100.271	18.8125	0.263861	0.261503	0.299383	0.24779	0.272207	0.29986	0.225658	0.187209	0.263689
100.271	18.8542	0.261276	0.259657	0.299303	0.245003	0.270039	0.303465	0.231311	0.183351	0.261107
100.271	18.8958	0.271272	0.271086	0.309215	0.256512	0.280534	0.312317	0.250758	0.200392	0.274831
100.271	18.9375	0.262271	0.261089	0.302311	0.242713	0.267171	0.308848	0.247901	0.203125	0.277539
100.271	18.9792	0.253773	0.255184	0.297776	0.23308	0.257298	0.303891	0.248682	0.20979	0.277958
100.271	19.0208	0.234695	0.236394	0.283355	0.211	0.233861	0.291474	0.232772	0.201245	0.265558
100.271	19.0625	0.22908	0.23012	0.277189	0.199596	0.223253	0.285709	0.228564	0.203082	0.263887
100.271	19.1042	0.214466	0.215667	0.26245	0.17249	0.202309	0.27357	0.217421	0.188186	0.249536
100.271	19.1458	0.211065	0.213587	0.25972	0.162954	0.19527	0.270925	0.220309	0.189478	0.248467
100.271	19.1875	0.224885	0.226838	0.271368	0.177519	0.209731	0.28067	0.238432	0.212678	0.265051
100.271	19.2292	0.213783	0.219029	0.266233	0.168718	0.1987	0.27298	0.233845	0.207632	0.260026
100.271	19.2708	0.196362	0.207245	0.254816	0.156614	0.180405	0.259821	0.224731	0.19699	0.24801
100.271	19.3125	0.197738	0.212478	0.256637	0.164274	0.181461	0.259116	0.230708	0.20676	0.249402
100.271	19.3542	0.183871	0.202463	0.249338	0.158693	0.172234	0.251026	0.225951	0.204018	0.244039
100.271	19.3958	0.1861	0.204788	0.250665	0.168963	0.182619	0.258775	0.237204	0.216843	0.250812
100.271	19.4375	0.208966	0.225051	0.268405	0.198881	0.214222	0.282722	0.263366	0.24753	0.275751
100.271	19.4792	0.21964	0.233573	0.274548	0.21001	0.225881	0.294832	0.276982	0.260264	0.283953
100.271	19.5208	0.236266	0.247484	0.282236	0.218961	0.234458	0.300246	0.291327	0.273756	0.292578
100.271	19.5625	0.235163	0.252493	0.286746	0.222527	0.234173	0.300496	0.295071	0.279483	0.291842
100.271	19.6042	0.249236	0.2667	0.298864	0.242466	0.248947	0.309122	0.304523	0.292899	0.302504
100.271	19.6458	0.248071	0.261893	0.2973	0.24666	0.250853	0.31082	0.302075	0.28717	0.298828
100.271	19.6875	0.257534	0.266058	0.304049	0.262271	0.263555	0.319608	0.306428	0.291459	0.302107
100.271	19.7292	0.275305	0.279576	0.317102	0.28517	0.284593	0.333368	0.317517	0.304144	0.311802
100.271	19.7708	0.285032	0.286671	0.323322	0.295509	0.295769	0.340413	0.323073	0.308224	0.315744
100.271	19.8125	0.287718	0.288256	0.323277	0.294077	0.29684	0.339145	0.321525	0.303158	0.313436
100.271	19.8542	0.276711	0.275699	0.308726	0.273855	0.278067	0.328738	0.30334	0.280205	0.297676
100.271	19.8958	0.272447	0.270493	0.300245	0.260963	0.268201	0.32157	0.28738	0.260782	0.28941
100.271	19.9375	0.282327	0.277665	0.309298	0.267537	0.27631	0.321022	0.283286	0.256961	0.292881
100.271	19.9792	0.288964	0.285244	0.318948	0.277295	0.286592	0.323406	0.284702	0.263737	0.300388
100.271	20.0208	0.274713	0.270053	0.304341	0.259318	0.262913	0.303365	0.26093	0.241001	0.276564
100.271	20.0625	0.253543	0.252654	0.285412	0.234354	0.230361	0.274781	0.231837	0.206031	0.244754
100.271	20.1042	0.247213	0.246473	0.276439	0.22036	0.209505	0.256735	0.210367	0.179864	0.223621
100.271	20.1458	0.255017	0.251414	0.277052	0.220594	0.207084	0.255527	0.204222	0.173774	0.217262
100.271	20.1875	0.249663	0.244522	0.262924	0.207842	0.186908	0.231412	0.177767	0.14546	0.190885
100.271	20.2292	0.260013	0.248921	0.262484	0.209966	0.18578	0.223147	0.168092	0.134091	0.182217
100.271	20.2708	0.272572	0.257413	0.265637	0.216352	0.192247	0.22434	0.168028	0.133385	0.180589
100.271	20.3125	0.259886	0.24667	0.24965	0.19671	0.157774	0.191288	0.144256	0.105059	0.148965
100.271	20.3542	0.251733	0.240361	0.241881	0.186913	0.138366	0.167762	0.132433	0.0884011	0.131593
100.271	20.3958	0.250613	0.240617	0.243326	0.187398	0.134113	0.158886	0.129634	0.0811275	0.123728
100.271	20.4375	0.258475	0.249646	0.254606	0.199911	0.143407	0.165857	0.136626	0.084524	0.125181
100.271	20.4792	0.271318	0.26133	0.267286	0.21823	0.160235	0.180359	0.149078	0.0962172	0.133318
100.271	20.5208	0.277335	0.263738	0.26903	0.224787	0.165981	0.184521	0.150774	0.101742	0.138402
100.271	20.5625	0.264852	0.245882	0.248459	0.201938	0.138588	0.15822	0.12631	0.0821395	0.12625
100.271	20.6042	0.258131	0.233443	0.23187	0.186742	0.125614	0.138159	0.109683	0.0735472	0.123693
100.271	20.6458	0.251278	0.220548	0.215916	0.176684	0.124114	0.126654	0.0974171	0.0715077	0.122128
100.271	20.6875	0.24815	0.214665	0.206817	0.17425	0.130586	0.125082	0.0942131	0.0757836	0.124775
100.271	20.7292	0.252223	0.217416	0.205456	0.178626	0.143676	0.132491	0.100648	0.087192	0.134284
100.271	6.72917	0.154553	0.0981709	0.0866888	0.0970448	0.0792582	0.0715298	0.102182	0.076483	0.0728594
100.271	6.77083	0.158592	0.0975198	0.088186	0.0971278	0.0734608	0.070572	0.102523	0.0753035	0.0747554
100.271	6.8125	0.17627	0.109748	0.0994193	0.113567	0.0814241	0.0808591	0.114701	0.0865336	0.0916969
100.271	6.85417	0.169094	0.100543	0.0855391	0.0982672	0.0725786	0.0701428	0.103598	0.0755776	0.0875104
100.271	6.89583	0.155297	0.0864115	0.0674257	0.0776424	0.0592393	0.055518	0.086388	0.0610209	0.0824842
100.271	6.9375	0.171076	0.0951752	0.0726975	0.0857583	0.0663518	0.0620784	0.0977652	0.0694516	0.0981633
100.271	6.97917	0.189686	0.107045	0.0827676	0.0997169	0.0746514	0.0740507	0.117556	0.0848454	0.111419
100.271	7.02083	0.207397	0.120514	0.0967764	0.117937	0.082491	0.0871718	0.133393	0.100296	0.121006
100.271	7.0625	0.250496	0.159414	0.136983	0.166377	0.119292	0.125917	0.170625	0.138502	0.151561
100.271	7.10417	0.254851	0.165121	0.140584	0.171786	0.122198	0.126968	0.17283	0.141806	0.15088
100.271	7.14583	0.229344	0.141395	0.118523	0.146596	0.0979054	0.101233	0.142367	0.114314	0.12649
100.271	7.1875	0.200189	0.121477	0.102383	0.126276	0.0817942	0.0814863	0.108762	0.0873682	0.103636
100.271	7.22917	0.173926	0.108096	0.0940175	0.114993	0.0716759	0.0675923	0.0809196	0.0679307	0.0835054
100.271	7.27083	0.172428	0.115205	0.109289	0.128706	0.0773856	0.0700903	0.0754099	0.0647888	0.0792821
100.271	7.3125	0.181591	0.126704	0.130886	0.15323	0.093347	0.0818961	0.0796019	0.0643692	0.0821067
100.271	7.35417	0.152059	0.0999382	0.107534	0.129157	0.0783925	0.0648219	0.0651464	0.0445088	0.0609082
100.271	7.39583	0.150239	0.0950024	0.104228	0.132439	0.0851357	0.0700567	0.0743369	0.0491554	0.068451
100.271	7.52083	0.205926	0.168252	0.17544	0.190129	0.138641	0.116381	0.129988	0.110817	0.12714
100.271	7.5625	0.183784	0.151237	0.153273	0.162387	0.105691	0.0904398	0.104786	0.0839231	0.101758
100.271	7.60417	0.178978	0.14908	0.148254	0.150628	0.0917952	0.0766518	0.0944071	0.0730619	0.0915458
100.271	7.77083	0.210845	0.171024	0.156121	0.151756	0.106063	0.0892753	0.101807	0.0858077	0.112112
100.271	7.8125	0.208938	0.172101	0.15287	0.149492	0.112388	0.0943276	0.107493	0.089168	0.115444
100.271	7.85417	0.221987	0.188243	0.164074	0.16268	0.132532	0.110882	0.125335	0.106308	0.132841
100.271	7.89583	0.242527	0.210149	0.182768	0.181867	0.157982	0.132804	0.147754	0.131966	0.157771
100.271	7.9375	0.261212	0.226199	0.198927	0.198544	0.181221	0.152027	0.167464	0.157491	0.182314
100.271	7.97917	0.26128	0.223933	0.200128	0.200734	0.18692	0.155601	0.169331	0.163277	0.186947
100.271	8.02083	0.252954	0.21188	0.193612	0.19642	0.183046	0.15185	0.16094	0.156836	0.181075
100.271	8.0625	0.253355	0.208827	0.195632	0.195194	0.179928	0.150162	0.154775	0.151837	0.175979
100.271	8.10417	0.252391	0.206922	0.1974	0.189215	0.169673	0.143432	0.143297	0.143583	0.166983
100.271	8.14583	0.260843	0.219544	0.211556	0.196597	0.173818	0.146676	0.146937	0.154229	0.178648
100.271	8.1875	0.25719	0.220318	0.215421	0.201299	0.176851	0.149658	0.154362	0.158584	0.18271
100.271	8.22917	0.241261	0.209319	0.209292	0.201023	0.177278	0.151396	0.158107	0.156804	0.175197
100.271	8.27083	0.246264	0.222392	0.223742	0.223374	0.197807	0.169923	0.176473	0.172738	0.189189
100.312	13.5208	0.164364	0.0875121	0.0862754	0.159366	0.177112	0.0495753	0.0142857	0.0132092	0.0251275
100.312	13.5625	0.145827	0.0729245	0.0756403	0.146573	0.158659	0.0334909	0.00900498	0.00834648	0.0153019
100.312	13.6042	0.133978	0.0644639	0.0671992	0.13479	0.144662	0.0239504	0.00626369	0.00620406	0.0108604
100.312	13.6458	0.139406	0.073406	0.0670362	0.13376	0.13978	0.0207243	0.00640584	0.0066485	0.0101055
100.312	13.6875	0.172348	0.0992503	0.0838829	0.154877	0.153775	0.023428	0.0090606	0.00978553	0.012423
100.312	13.7292	0.159635	0.0831562	0.0690097	0.144052	0.13443	0.0108138	0.00600923	0.00797065	0.0106516
100.312	13.7708	0.169639	0.0830748	0.070238	0.155916	0.136549	0.0112656	0.00807408	0.0125435	0.021049
100.312	13.8125	0.156468	0.0701648	0.058762	0.145879	0.13017	0.00772561	0.0055656	0.0089493	0.0164387
100.312	13.8542	0.158897	0.0861163	0.0785709	0.16835	0.16284	0.0111145	0.0120711	0.0138948	0.0162257
100.312	13.8958	0.159965	0.0872968	0.0894093	0.177514	0.18114	0.0249115	0.0176998	0.016188	0.0200381
100.312	13.9375	0.175391	0.105037	0.1089	0.190483	0.196463	0.0510151	0.0275766	0.0182948	0.0244519
100.312	13.9792	0.188708	0.114972	0.120803	0.197295	0.202723	0.0664115	0.0334545	0.0194752	0.0242243
100.312	14.0208	0.200074	0.122529	0.1297	0.202228	0.208177	0.0728802	0.0330213	0.0191385	0.0243882
100.312	14.0625	0.223334	0.145155	0.153643	0.220844	0.225945	0.0906048	0.0384946	0.0238795	0.0315052
100.312	14.1042	0.250105	0.177272	0.185349	0.244764	0.248063	0.117591	0.0516351	0.0329774	0.0439649
100.312	14.1458	0.260157	0.19635	0.204275	0.255931	0.25608	0.131854	0.0618109	0.0371037	0.0490465
100.312	14.1875	0.271299	0.215695	0.225232	0.268904	0.265099	0.1488	0.0736211	0.0439102	0.0588008
100.312	14.2292	0.241188	0.185461	0.198247	0.23855	0.23259	0.117132	0.0484126	0.0301499	0.0437427
100.312	14.2708	0.22196	0.165889	0.178189	0.221059	0.210781	0.106759	0.0389497	0.026028	0.0380651
100.312	14.3125	0.217357	0.159389	0.171437	0.218389	0.200885	0.109524	0.044885	0.0315498	0.0381107
100.312	14.3542	0.223981	0.167065	0.175977	0.223484	0.200585	0.118445	0.0652037	0.041149	0.0419324
100.312	14.3958	0.231804	0.18023	0.183212	0.225107	0.201502	0.125639	0.0866582	0.0480345	0.0445177
100.312	14.4375	0.230657	0.1848	0.182484	0.220967	0.201323	0.126445	0.0916596	0.0496543	0.0422946
100.312	14.4792	0.205704	0.164312	0.162885	0.200901	0.187437	0.115508	0.0854616	0.0394267	0.0285078
100.312	14.5208	0.162955	0.130674	0.132605	0.165128	0.159198	0.0944703	0.0716388	0.0233824	0.0170208
100.312	14.5625	0.126871	0.105924	0.11175	0.1359	0.136974	0.0801876	0.065334	0.0132959	0.0123882
100.312	14.6042	0.114506	0.0999401	0.107664	0.130137	0.133451	0.083045	0.0755455	0.0113129	0.0104693
100.312	14.6458	0.101057	0.0865145	0.0947027	0.118837	0.121126	0.0719815	0.0642831	0.00919791	0.00733729
100.312	14.6875	0.103164	0.0897346	0.0985421	0.126253	0.129704	0.0712866	0.0517043	0.00849698	0.00675665
100.312	14.7292	0.0960426	0.0829371	0.0927495	0.121456	0.126057	0.0607889	0.0347964	0.00656906	0.00629184
100.312	14.7708	0.0959629	0.0826837	0.0938075	0.12292	0.12966	0.0563872	0.0256358	0.00575075	0.00749291
100.312	14.8125	0.102249	0.0882201	0.100705	0.129766	0.139576	0.0566362	0.0213879	0.005625	0.0106389
100.312	14.8542	0.111955	0.0961714	0.109654	0.139026	0.151765	0.0585887	0.0191953	0.00577668	0.0157444
100.312	14.8958	0.115253	0.103682	0.115608	0.143294	0.159411	0.0585412	0.0171645	0.0056534	0.0174394
100.312	14.9375	0.11153	0.100458	0.113809	0.130153	0.141964	0.0493784	0.0131655	0.00467457	0.0103325
100.312	14.9792	0.107199	0.101717	0.118891	0.138402	0.144054	0.0509038	0.0183824	0.00515176	0.00797001
100.312	15.0208	0.150487	0.140957	0.150693	0.179867	0.177578	0.0826541	0.039528	0.00940471	0.0113046
100.312	15.0625	0.182088	0.169114	0.173393	0.209317	0.200701	0.109623	0.0621707	0.0163241	0.016616
100.312	15.1042	0.201333	0.186552	0.193415	0.235569	0.221117	0.132132	0.087646	0.028852	0.0271548
100.312	15.1458	0.216988	0.198927	0.212544	0.260535	0.243414	0.16176	0.118778	0.0495502	0.0450788
100.312	15.1875	0.205603	0.18607	0.201675	0.252456	0.242981	0.165776	0.133281	0.0482851	0.0507227
100.312	15.2292	0.204137	0.182368	0.203399	0.259075	0.249703	0.176808	0.153765	0.0610801	0.0694842
100.312	15.2708	0.179722	0.15925	0.187789	0.256357	0.241532	0.171203	0.158769	0.0796133	0.0864089
100.312	15.3125	0.191756	0.167781	0.20286	0.266924	0.253376	0.188834	0.189322	0.121955	0.130799
100.312	15.3542	0.209604	0.177683	0.215335	0.272588	0.263582	0.206882	0.215746	0.166348	0.177649
100.312	15.3958	0.249706	0.215789	0.247373	0.294457	0.289864	0.249005	0.262858	0.232562	0.244376
100.312	15.4375	0.230056	0.192197	0.222527	0.27067	0.26883	0.237899	0.25227	0.219789	0.236037
100.312	15.4792	0.228984	0.185757	0.21233	0.26078	0.26088	0.240101	0.257431	0.223713	0.237274
100.312	15.5208	0.246751	0.198934	0.220223	0.266173	0.265368	0.25005	0.270967	0.242329	0.25274
100.312	15.5625	0.255296	0.208003	0.220943	0.256632	0.254202	0.242147	0.259503	0.230306	0.242993
100.312	15.6042	0.276175	0.228333	0.23364	0.264439	0.262332	0.250324	0.259621	0.232025	0.245207
100.312	15.6458	0.303473	0.254934	0.253112	0.284265	0.284109	0.270108	0.268932	0.242014	0.255903
100.312	15.6875	0.319738	0.272086	0.26509	0.295139	0.294291	0.280814	0.274066	0.245932	0.258266
100.312	15.7292	0.327335	0.280469	0.270463	0.300027	0.297509	0.28497	0.27686	0.24558	0.256773
100.312	15.7708	0.3231	0.282719	0.270683	0.297623	0.293442	0.285454	0.275013	0.236381	0.247793
100.312	15.8125	0.29019	0.281496	0.278435	0.295652	0.292713	0.290936	0.272177	0.225692	0.237697
100.312	15.8542	0.260084	0.275274	0.283529	0.293586	0.291357	0.291675	0.268517	0.215233	0.226511
100.312	15.8958	0.235612	0.275773	0.299055	0.299183	0.29744	0.300698	0.27883	0.226097	0.236697
100.312	15.9375	0.22309	0.275946	0.303269	0.295307	0.290652	0.30008	0.273848	0.21944	0.232243
100.312	15.9792	0.188499	0.258363	0.292546	0.281867	0.274119	0.291839	0.253869	0.198456	0.214283
100.312	16.0208	0.161985	0.238138	0.27356	0.254032	0.248231	0.272443	0.232418	0.177404	0.199344
100.312	16.0625	0.151137	0.221718	0.247578	0.214797	0.210946	0.245097	0.198693	0.14442	0.173789
100.312	16.1042	0.129541	0.204367	0.227278	0.18554	0.184146	0.229759	0.179103	0.128576	0.165109
100.312	16.1458	0.100056	0.190884	0.216729	0.16943	0.170734	0.230816	0.175647	0.127753	0.168649
100.312	16.1875	0.0676905	0.183324	0.216517	0.165848	0.171924	0.24456	0.187306	0.141602	0.183337
100.312	16.2292	0.0537267	0.17211	0.21496	0.163952	0.178264	0.259523	0.201705	0.160456	0.201647
100.312	16.2708	0.0369619	0.129569	0.188047	0.136814	0.167884	0.255567	0.195474	0.156832	0.199816
100.312	16.3125	0.0453038	0.157267	0.203421	0.137052	0.161247	0.245364	0.173751	0.134565	0.180943
100.312	16.3542	0.041723	0.15574	0.196938	0.122687	0.142401	0.22523	0.143212	0.111416	0.158352
100.312	16.3958	0.0422059	0.156514	0.200579	0.130228	0.145847	0.221708	0.141292	0.109899	0.15371
100.312	16.4375	0.0455215	0.155421	0.208909	0.147612	0.15748	0.231037	0.158371	0.121472	0.163356
100.312	16.4792	0.0498605	0.168212	0.233767	0.18013	0.184605	0.256455	0.19533	0.156848	0.196734
100.312	16.5208	0.0625469	0.183738	0.254187	0.201909	0.205415	0.272075	0.220615	0.185837	0.227839
100.312	16.5625	0.0979367	0.193183	0.266844	0.216587	0.220643	0.282407	0.236086	0.203677	0.246119
100.312	16.6042	0.0735261	0.169104	0.252374	0.202991	0.210431	0.273228	0.226899	0.191217	0.234112
100.312	16.6458	0.0527091	0.144926	0.240473	0.192055	0.202655	0.268261	0.223547	0.182804	0.22553
100.312	16.6875	0.0398587	0.128254	0.2383	0.192863	0.207842	0.273373	0.231687	0.189216	0.227594
100.312	16.7292	0.0303102	0.115273	0.241823	0.20188	0.222144	0.285461	0.24589	0.206262	0.237817
100.312	16.7708	0.0221316	0.103111	0.247068	0.214	0.237983	0.300422	0.262895	0.22444	0.251189
100.312	16.8125	0.0122111	0.0807769	0.238964	0.214662	0.240968	0.305277	0.269088	0.228767	0.252951
100.312	16.8542	0.0129626	0.085548	0.246435	0.218077	0.243505	0.304413	0.26541	0.218593	0.243977
100.312	16.8958	0.0257305	0.114876	0.261039	0.222153	0.242588	0.295887	0.247221	0.193397	0.221154
100.312	16.9375	0.0601321	0.158567	0.276158	0.239797	0.250817	0.295135	0.233652	0.176684	0.20368
100.312	16.9792	0.123315	0.204847	0.289548	0.265573	0.268348	0.302437	0.226817	0.168689	0.194948
100.312	17.0208	0.182726	0.243202	0.30225	0.290426	0.291316	0.313689	0.232342	0.170279	0.197542
100.312	17.0625	0.182357	0.251273	0.301219	0.298668	0.297894	0.311883	0.228749	0.163967	0.187456
100.312	17.1042	0.152518	0.235548	0.294846	0.283252	0.278116	0.292013	0.198748	0.126033	0.145377
100.312	17.1458	0.168592	0.239592	0.295874	0.289866	0.286537	0.294492	0.216998	0.130377	0.144858
100.312	17.1875	0.206498	0.25583	0.305457	0.301493	0.299046	0.304952	0.23984	0.143631	0.155257
100.312	17.2292	0.134098	0.210843	0.298424	0.27881	0.283183	0.298815	0.22734	0.124837	0.135719
100.312	17.2708	0.0529641	0.128875	0.264413	0.246528	0.265312	0.291996	0.21068	0.108856	0.118345
100.312	17.3125	0.0234306	0.0853384	0.24164	0.238973	0.272231	0.302386	0.23124	0.125447	0.128133
100.312	17.3542	0.0152875	0.0599906	0.216465	0.223587	0.266977	0.300612	0.232867	0.12669	0.125217
100.312	17.3958	0.0347952	0.08748	0.241917	0.245008	0.283845	0.31154	0.252119	0.141999	0.13297
100.312	17.4375	0.0620751	0.112603	0.248264	0.246264	0.282379	0.3104	0.246014	0.133955	0.126312
100.312	17.4792	0.0935256	0.136139	0.251877	0.241308	0.275948	0.309221	0.234267	0.119602	0.117087
100.312	17.5208	0.124016	0.155865	0.256611	0.236355	0.268229	0.309086	0.224063	0.109152	0.113624
100.312	17.5625	0.132515	0.160855	0.255965	0.231791	0.259834	0.304091	0.220691	0.102966	0.107329
100.312	17.6042	0.146633	0.171861	0.255209	0.226522	0.252555	0.296771	0.220055	0.100085	0.101624
100.312	17.6458	0.154706	0.174586	0.246017	0.213633	0.239074	0.289362	0.214416	0.0949783	0.0919321
100.312	17.6875	0.187784	0.204716	0.264937	0.233344	0.255216	0.303566	0.236455	0.112334	0.101886
100.312	17.7292	0.233911	0.24303	0.292953	0.26523	0.283643	0.326685	0.267266	0.14561	0.128063
100.312	17.7708	0.247431	0.25139	0.296112	0.27122	0.286466	0.327621	0.272756	0.153105	0.135541
100.312	17.8125	0.230517	0.234878	0.281213	0.25817	0.26949	0.309552	0.253912	0.137304	0.12691
100.312	17.8542	0.195085	0.201457	0.254421	0.230499	0.240844	0.282209	0.221121	0.107597	0.103802
100.312	17.8958	0.204487	0.210053	0.262972	0.240424	0.253139	0.287765	0.2326	0.119463	0.118554
100.312	17.9375	0.221214	0.229278	0.279921	0.258258	0.272236	0.300339	0.252535	0.142156	0.142958
100.312	17.9792	0.232009	0.24098	0.286815	0.26308	0.275809	0.301744	0.255854	0.156318	0.154809
100.312	18.0208	0.22991	0.242393	0.285459	0.252097	0.266987	0.297047	0.246184	0.159944	0.160182
100.312	18.0625	0.222699	0.239331	0.282454	0.237973	0.254873	0.289389	0.234937	0.163816	0.169217
100.312	18.1042	0.21978	0.229702	0.275932	0.226122	0.242085	0.280209	0.221798	0.164839	0.177624
100.312	18.1458	0.234442	0.238262	0.285088	0.231742	0.247207	0.286416	0.227997	0.179426	0.201565
100.312	18.1875	0.238686	0.243378	0.289943	0.2326	0.249629	0.287359	0.23099	0.189064	0.218117
100.312	18.2292	0.233031	0.241822	0.285098	0.229385	0.248007	0.28196	0.23309	0.195292	0.229353
100.312	18.2708	0.261336	0.26484	0.29811	0.257354	0.270481	0.297632	0.260601	0.230379	0.262775
100.312	18.3125	0.269182	0.268846	0.297023	0.26314	0.275028	0.303634	0.266501	0.239542	0.272714
100.312	18.3542	0.284438	0.28523	0.308169	0.279241	0.288329	0.308468	0.281412	0.258561	0.294684
100.312	18.3958	0.256729	0.262647	0.29407	0.255023	0.273048	0.29437	0.261921	0.240648	0.278379
100.312	18.4375	0.245884	0.252269	0.287394	0.245294	0.266676	0.287059	0.255836	0.236553	0.26936
100.312	18.4792	0.245384	0.249354	0.285225	0.243531	0.268351	0.289294	0.256114	0.237424	0.266808
100.312	18.5208	0.25772	0.261905	0.293566	0.257392	0.282323	0.30185	0.270195	0.25175	0.279479
100.312	18.5625	0.279226	0.282354	0.310953	0.282415	0.302649	0.320227	0.293402	0.277315	0.304248
100.312	18.6042	0.277685	0.277924	0.307921	0.276138	0.299341	0.321232	0.284775	0.263774	0.302671
100.312	18.6458	0.281507	0.280732	0.311381	0.276725	0.298594	0.321423	0.276187	0.253223	0.302577
100.312	18.6875	0.293376	0.293212	0.324029	0.287439	0.304979	0.324688	0.274402	0.25316	0.304816
100.312	18.7292	0.282391	0.280421	0.312118	0.274054	0.294647	0.310942	0.249348	0.217833	0.284816
100.312	18.7708	0.28582	0.28081	0.312228	0.272813	0.292351	0.310919	0.240242	0.201686	0.278044
100.312	18.8125	0.286889	0.281504	0.313637	0.271572	0.290626	0.313161	0.239961	0.194246	0.274386
100.312	18.8542	0.28033	0.276287	0.311071	0.264764	0.285452	0.312636	0.239756	0.1835	0.267487
100.312	18.8958	0.256696	0.254914	0.295516	0.240502	0.264358	0.299503	0.218483	0.155604	0.251731
100.312	18.9375	0.25184	0.251831	0.293912	0.232079	0.26121	0.300285	0.225863	0.171521	0.2639
100.312	18.9792	0.236805	0.238546	0.284288	0.217144	0.245435	0.290113	0.219035	0.169401	0.253861
100.312	19.0208	0.235393	0.2356	0.281761	0.212994	0.238158	0.287208	0.222837	0.184773	0.255742
100.312	19.0625	0.247112	0.243136	0.285953	0.217939	0.240522	0.292659	0.236645	0.212481	0.27295
100.312	19.1042	0.243117	0.239125	0.279231	0.203532	0.231494	0.288163	0.236456	0.212205	0.271882
100.312	19.1458	0.236269	0.235714	0.276244	0.191015	0.224798	0.284619	0.23916	0.212567	0.271139
100.312	19.1875	0.240489	0.240896	0.28303	0.19548	0.231644	0.290281	0.25207	0.227818	0.279813
100.312	19.2292	0.209672	0.216422	0.264322	0.166633	0.200913	0.267362	0.22739	0.202328	0.259248
100.312	19.2708	0.186285	0.2004	0.250678	0.150421	0.177232	0.251164	0.213689	0.188351	0.245887
100.312	19.3125	0.182363	0.201746	0.249334	0.154025	0.172563	0.248453	0.217746	0.194185	0.244783
100.312	19.3542	0.193866	0.213874	0.258288	0.170095	0.183323	0.257227	0.232443	0.21404	0.254365
100.312	19.3958	0.193515	0.214015	0.258562	0.175797	0.185825	0.26056	0.240593	0.224053	0.258461
100.312	19.4375	0.210306	0.227959	0.270367	0.19854	0.209358	0.280553	0.261591	0.247269	0.276103
100.312	19.4792	0.22648	0.240054	0.281639	0.216602	0.228247	0.297464	0.278941	0.264071	0.289449
100.312	19.5208	0.222316	0.238249	0.278164	0.206558	0.219845	0.291222	0.279353	0.262272	0.283312
100.312	19.5625	0.240306	0.257702	0.294217	0.227137	0.236955	0.300435	0.292806	0.281123	0.296174
100.312	19.6042	0.240228	0.256732	0.293631	0.234744	0.23928	0.300251	0.290339	0.27606	0.292608
100.312	19.6458	0.244153	0.25588	0.294459	0.244247	0.245018	0.30463	0.289455	0.272328	0.290414
100.312	19.6875	0.261365	0.268126	0.305529	0.266292	0.265862	0.317935	0.298295	0.283014	0.299393
100.312	19.7292	0.278889	0.282453	0.317845	0.286011	0.286995	0.33129	0.309939	0.295843	0.309122
100.312	19.7708	0.301193	0.301927	0.333395	0.308368	0.311091	0.346966	0.326538	0.312973	0.32492
100.312	19.8125	0.305145	0.304688	0.333414	0.308629	0.31199	0.348136	0.327379	0.310838	0.325839
100.312	19.8542	0.29532	0.291757	0.320248	0.290618	0.293904	0.338458	0.308558	0.289652	0.313781
100.312	19.8958	0.291871	0.287387	0.315376	0.280989	0.285959	0.332407	0.293852	0.27367	0.308682
100.312	19.9375	0.294489	0.289082	0.318986	0.28136	0.28923	0.32802	0.286134	0.264929	0.30568
100.312	19.9792	0.303799	0.298089	0.328809	0.288488	0.297938	0.32817	0.286549	0.266542	0.306141
100.312	20.0208	0.285602	0.282651	0.311704	0.265654	0.267582	0.301112	0.255631	0.234713	0.275287
100.312	20.0625	0.261751	0.262742	0.290925	0.235214	0.228855	0.265837	0.21838	0.194744	0.236725
100.312	20.1042	0.257234	0.257362	0.283094	0.222058	0.204098	0.243377	0.193929	0.167792	0.211443
100.312	20.1458	0.262795	0.2585	0.279578	0.218172	0.192851	0.232844	0.181628	0.156362	0.196908
100.312	20.1875	0.270202	0.261399	0.278697	0.220788	0.19107	0.229367	0.175	0.150463	0.191064
100.312	20.2292	0.273193	0.260624	0.272962	0.21769	0.183315	0.214823	0.160406	0.133518	0.179119
100.312	20.2708	0.275374	0.261245	0.268387	0.214382	0.173459	0.202444	0.151721	0.120936	0.166594
100.312	20.3125	0.263209	0.251351	0.253075	0.197856	0.139501	0.170068	0.132232	0.098802	0.139113
100.312	20.3542	0.256378	0.245996	0.245474	0.190752	0.122198	0.15034	0.122551	0.0855707	0.123464
100.312	20.3958	0.25555	0.246318	0.245769	0.193484	0.122389	0.145449	0.120212	0.0800764	0.116598
100.312	20.4375	0.259769	0.249236	0.251626	0.198688	0.130001	0.145787	0.119612	0.0762713	0.11304
100.312	20.4792	0.265077	0.249977	0.255684	0.200649	0.134873	0.144292	0.114996	0.0700802	0.107583
100.312	20.5208	0.268752	0.249069	0.254698	0.20304	0.133953	0.141182	0.111816	0.0662116	0.108272
100.312	20.5625	0.26871	0.245142	0.24727	0.196806	0.128178	0.134851	0.109337	0.0629078	0.114143
100.312	20.6042	0.267831	0.240754	0.236868	0.186134	0.121521	0.122502	0.101262	0.0619745	0.117694
100.312	20.6458	0.261396	0.230601	0.21966	0.17496	0.116928	0.108732	0.0901395	0.0601869	0.114394
100.312	20.6875	0.255579	0.223272	0.207437	0.171327	0.119934	0.105333	0.0878154	0.0643758	0.114332
100.312	20.7292	0.256004	0.223596	0.204684	0.174235	0.132052	0.111497	0.0930871	0.0758335	0.121419
100.312	20.7708	0.25103	0.221064	0.199546	0.175894	0.134218	0.110787	0.0994105	0.079815	0.122363
100.312	6.6875	0.133947	0.078435	0.0625096	0.0845249	0.0705953	0.0625175	0.0908009	0.0716974	0.0696995
100.312	6.72917	0.14788	0.087114	0.0741907	0.0897106	0.0721853	0.0684108	0.0964582	0.0717434	0.0729387
100.312	6.77083	0.159822	0.0947602	0.0812745	0.0946691	0.0721702	0.0725308	0.101167	0.0746783	0.0831616
100.312	6.8125	0.17405	0.103564	0.0875054	0.10445	0.0772159	0.0773668	0.109959	0.0827627	0.094942
100.312	6.85417	0.169542	0.0976885	0.0766856	0.0951163	0.0718648	0.0682801	0.102823	0.0745197	0.0894897
100.312	6.89583	0.153679	0.0818213	0.057092	0.0725967	0.0538692	0.0535819	0.0839613	0.0571941	0.080024
100.312	6.9375	0.168864	0.0894267	0.0611022	0.0795514	0.0618433	0.06108	0.0967076	0.0687936	0.0937949
100.312	6.97917	0.187476	0.0993629	0.0708241	0.0920996	0.0696885	0.0735446	0.115101	0.0834075	0.104894
100.312	7.02083	0.182214	0.0945486	0.0696057	0.0907717	0.061669	0.0738469	0.114028	0.0817156	0.098914
100.312	7.0625	0.232063	0.136166	0.110572	0.140152	0.0990784	0.111348	0.157766	0.126358	0.134193
100.312	7.10417	0.2517	0.160356	0.13362	0.167294	0.119905	0.129774	0.174648	0.143481	0.151357
100.312	7.14583	0.227305	0.139389	0.118349	0.149269	0.103051	0.111876	0.149518	0.119974	0.130617
100.312	7.1875	0.198063	0.120841	0.103217	0.130771	0.0897564	0.0928864	0.117778	0.0929762	0.10766
100.312	7.22917	0.178528	0.113422	0.0994978	0.126237	0.0849154	0.0824929	0.0946308	0.0782095	0.0914859
100.312	7.27083	0.178001	0.121452	0.1144	0.141636	0.0933236	0.0851054	0.088753	0.0760935	0.0883451
100.312	7.3125	0.17426	0.123393	0.124794	0.151776	0.0979755	0.0864985	0.0797425	0.0690951	0.082197
100.312	7.35417	0.164195	0.112305	0.119221	0.143838	0.0961969	0.0803171	0.0747127	0.0578527	0.072824
100.312	7.39583	0.161654	0.109088	0.117874	0.15088	0.105524	0.0853575	0.0839623	0.0600692	0.0782032
100.312	7.4375	0.173264	0.125209	0.134252	0.174431	0.123741	0.103549	0.103207	0.0763684	0.0968263
100.312	7.52083	0.187216	0.152031	0.155097	0.178184	0.127728	0.105918	0.114477	0.101787	0.118888
100.312	7.5625	0.19203	0.159736	0.160883	0.171537	0.115782	0.100019	0.1112	0.101317	0.122186
100.312	7.60417	0.190625	0.159336	0.157839	0.164365	0.108293	0.091821	0.107167	0.0943279	0.118517
100.312	7.64583	0.200553	0.165365	0.160986	0.164114	0.113899	0.0931432	0.106609	0.0977255	0.123048
100.312	7.6875	0.220297	0.180717	0.173036	0.175843	0.131339	0.109524	0.115684	0.114802	0.140499
100.312	7.72917	0.212362	0.171165	0.158241	0.162092	0.117741	0.0972614	0.105646	0.101885	0.126675
100.312	7.77083	0.202763	0.162461	0.145253	0.149525	0.110773	0.09151	0.101284	0.0930009	0.1177
100.312	7.8125	0.207482	0.170472	0.148475	0.153223	0.122811	0.101171	0.111168	0.0989159	0.125281
100.312	7.85417	0.218975	0.184107	0.158226	0.163707	0.140906	0.116901	0.126916	0.113252	0.140927
100.312	7.89583	0.236577	0.203038	0.174131	0.179252	0.163031	0.137326	0.146408	0.134486	0.162878
100.312	7.9375	0.256195	0.224478	0.195354	0.198236	0.187122	0.16121	0.16796	0.159951	0.18891
100.312	7.97917	0.273816	0.240268	0.214099	0.217136	0.209348	0.183171	0.18729	0.184915	0.214563
100.312	8.02083	0.274456	0.238103	0.217245	0.22095	0.215423	0.190556	0.189703	0.189955	0.221008
100.312	8.0625	0.258264	0.219293	0.204416	0.20427	0.194436	0.170696	0.169058	0.167671	0.194158
100.354	13.5208	0.188878	0.0979057	0.0895812	0.174097	0.192421	0.0663797	0.019904	0.0207429	0.0332252
100.354	13.5625	0.15464	0.0674683	0.0644524	0.145123	0.157733	0.0370368	0.00955846	0.0095679	0.0150048
100.354	13.6042	0.148643	0.0615111	0.0597573	0.140968	0.151668	0.032651	0.00874971	0.00809308	0.0145497
100.354	13.6458	0.166431	0.0847964	0.074786	0.153265	0.159425	0.0303925	0.0105905	0.0101874	0.0162056
100.354	13.6875	0.205034	0.120597	0.105674	0.185981	0.185896	0.039618	0.0176034	0.0197955	0.0281171
100.354	13.7292	0.173072	0.0873797	0.0747718	0.160405	0.158167	0.0192244	0.00899675	0.00992152	0.0151725
100.354	13.7708	0.160287	0.0723123	0.06113	0.154476	0.145989	0.0155351	0.00839679	0.00824643	0.0191371
100.354	13.8125	0.150737	0.066325	0.0555207	0.152677	0.145865	0.0146183	0.00852853	0.00762077	0.0168203
100.354	13.8542	0.159179	0.084366	0.0758482	0.178926	0.180769	0.0214037	0.0179309	0.0133505	0.0164454
100.354	13.8958	0.178509	0.10248	0.0971535	0.199444	0.206032	0.0415213	0.0306039	0.0226665	0.0224164
100.354	13.9375	0.191142	0.110113	0.106834	0.201963	0.2116	0.0697239	0.0444753	0.0254266	0.0266743
100.354	13.9792	0.197945	0.113595	0.11084	0.202891	0.210876	0.0686013	0.0395891	0.0230872	0.0234009
100.354	14.0208	0.215045	0.127611	0.127792	0.215513	0.219989	0.0786111	0.0415969	0.0244836	0.0256654
100.354	14.0625	0.201311	0.115166	0.120126	0.201909	0.201744	0.0675589	0.0337492	0.0180672	0.0185083
100.354	14.1042	0.210074	0.128591	0.13655	0.209323	0.20603	0.0748483	0.0361007	0.0183595	0.0186945
100.354	14.1458	0.239531	0.168762	0.177791	0.238811	0.233043	0.104219	0.0495132	0.0253633	0.0293152
100.354	14.1875	0.242602	0.178802	0.190053	0.243845	0.234912	0.110884	0.0494361	0.0249015	0.0334184
100.354	14.2292	0.20932	0.149905	0.162719	0.212742	0.204367	0.0811958	0.027821	0.015999	0.0231647
100.354	14.2708	0.190508	0.134761	0.148365	0.19584	0.186642	0.0730494	0.021942	0.0138217	0.0203654
100.354	14.3125	0.181662	0.12363	0.137682	0.188741	0.173326	0.0721098	0.0236757	0.0154302	0.0196452
100.354	14.3542	0.193944	0.134627	0.144219	0.196564	0.174895	0.0855827	0.0396566	0.0252556	0.0237771
100.354	14.3958	0.236041	0.18524	0.186684	0.230958	0.206445	0.124066	0.0811323	0.0479022	0.0452128
100.354	14.4375	0.230466	0.186048	0.186266	0.226685	0.206446	0.130014	0.0885742	0.0487936	0.0429995
100.354	14.4792	0.18997	0.149947	0.151523	0.192328	0.177221	0.106815	0.0727031	0.0321047	0.023214
100.354	14.5208	0.1482	0.119531	0.123704	0.158241	0.150892	0.087626	0.0622774	0.0184099	0.0151913
100.354	14.5625	0.118058	0.102467	0.108794	0.136162	0.135111	0.0786814	0.0622086	0.0111414	0.0121515
100.354	14.6042	0.106826	0.0960063	0.103845	0.130236	0.131683	0.0814796	0.0729961	0.0102753	0.0102179
100.354	14.6458	0.0997251	0.0869762	0.0960181	0.123114	0.124789	0.0739372	0.064682	0.00902147	0.00837899
100.354	14.6875	0.0862473	0.0770565	0.0854911	0.113261	0.115273	0.0591268	0.0418134	0.00627106	0.00578753
100.354	14.7292	0.0798824	0.0731795	0.081963	0.109451	0.11241	0.050284	0.0277109	0.00491116	0.00505445
100.354	14.7708	0.0780991	0.0728219	0.0826011	0.109368	0.113533	0.0451543	0.0192336	0.00423053	0.00534036
100.354	14.8125	0.092128	0.0888975	0.100102	0.125865	0.134803	0.0521495	0.0184587	0.00508379	0.00869065
100.354	14.8542	0.101589	0.0958655	0.108783	0.134841	0.146129	0.0528817	0.0160915	0.00535227	0.0127635
100.354	14.8958	0.11587	0.106744	0.12171	0.147639	0.160853	0.0567098	0.0153412	0.00606572	0.0202434
100.354	14.9375	0.113738	0.106845	0.1257	0.148211	0.161148	0.0562778	0.015631	0.00650496	0.0176071
100.354	14.9792	0.116971	0.111695	0.131504	0.152816	0.161815	0.0641466	0.0219529	0.00809073	0.0129231
100.354	15.0208	0.135349	0.127283	0.143282	0.170987	0.173594	0.0818264	0.0356377	0.0120853	0.013866
100.354	15.0625	0.175386	0.162673	0.174163	0.210396	0.20598	0.116836	0.0661997	0.0234261	0.0246779
100.354	15.1042	0.194543	0.182599	0.198809	0.238731	0.227319	0.143148	0.0981812	0.039811	0.0391063
100.354	15.1458	0.205576	0.189977	0.209239	0.257143	0.244836	0.165714	0.12484	0.0566883	0.0567186
100.354	15.1875	0.21976	0.196757	0.219235	0.274538	0.266483	0.192769	0.15976	0.0789503	0.0842575
100.354	15.2292	0.194674	0.171585	0.20294	0.269473	0.259142	0.181544	0.15817	0.0787923	0.0894624
100.354	15.2708	0.191744	0.167072	0.202672	0.275704	0.261273	0.185169	0.173294	0.107325	0.112643
100.354	15.3125	0.196691	0.170682	0.205936	0.272413	0.258675	0.194406	0.194143	0.132679	0.136192
100.354	15.3542	0.210005	0.179467	0.21762	0.270384	0.260694	0.210491	0.220556	0.170704	0.177887
100.354	15.3958	0.227715	0.191296	0.226253	0.27624	0.269254	0.230845	0.244611	0.206072	0.216968
100.354	15.4375	0.243893	0.200133	0.230186	0.283328	0.281454	0.250611	0.259653	0.221112	0.233506
100.354	15.4792	0.254374	0.207835	0.230963	0.280955	0.281749	0.261736	0.272838	0.237182	0.245271
100.354	15.5208	0.270374	0.223519	0.240162	0.283141	0.284166	0.269706	0.282218	0.251408	0.256133
100.354	15.5625	0.27515	0.229113	0.240646	0.27418	0.273334	0.261359	0.272186	0.236297	0.243599
100.354	15.6042	0.287329	0.242629	0.24871	0.279344	0.275889	0.262939	0.268775	0.231111	0.239956
100.354	15.6458	0.314126	0.274639	0.275406	0.299606	0.295616	0.283399	0.282269	0.250115	0.259762
100.354	15.6875	0.338711	0.300708	0.297416	0.320449	0.316569	0.303223	0.295967	0.266951	0.276924
100.354	15.7292	0.348135	0.31293	0.308097	0.329156	0.324733	0.313229	0.303008	0.274434	0.282232
100.354	15.7708	0.326392	0.301694	0.296099	0.316844	0.313688	0.303896	0.284024	0.242808	0.256666
100.354	15.8125	0.301608	0.290139	0.285464	0.305109	0.304302	0.295352	0.266107	0.21247	0.227375
100.354	15.8542	0.2749	0.28676	0.29087	0.303205	0.302489	0.29761	0.264846	0.20881	0.220842
100.354	15.8958	0.252647	0.28945	0.306744	0.309135	0.30759	0.307973	0.27647	0.223045	0.233105
100.354	15.9375	0.224209	0.289224	0.326298	0.324079	0.322297	0.327093	0.301797	0.254221	0.262678
100.354	15.9792	0.219572	0.277215	0.303632	0.292999	0.289532	0.302576	0.26791	0.215719	0.229165
100.354	16.0208	0.209277	0.259129	0.277832	0.2572	0.253002	0.275963	0.233163	0.179077	0.199396
100.354	16.0625	0.193926	0.236037	0.250747	0.220592	0.216739	0.249101	0.200494	0.147744	0.175331
100.354	16.1042	0.170261	0.210509	0.227665	0.190192	0.188319	0.230721	0.178668	0.127965	0.161569
100.354	16.1458	0.134328	0.187549	0.21503	0.170455	0.173534	0.228479	0.173755	0.124248	0.162721
100.354	16.1875	0.0868042	0.171385	0.21245	0.163364	0.171477	0.239594	0.182946	0.136373	0.17774
100.354	16.2292	0.0500777	0.16389	0.2155	0.166366	0.179235	0.258443	0.199922	0.159369	0.201868
100.354	16.2708	0.0496914	0.158839	0.21361	0.162133	0.179612	0.264583	0.203285	0.163172	0.206448
100.354	16.3125	0.0448383	0.15028	0.192845	0.12415	0.145983	0.233564	0.159036	0.113906	0.159987
100.354	16.3542	0.0446873	0.145825	0.182634	0.106628	0.124676	0.210244	0.124355	0.082758	0.130976
100.354	16.3958	0.0506941	0.146684	0.185984	0.114192	0.127592	0.207319	0.119736	0.0781861	0.123404
100.354	16.4375	0.0572697	0.14233	0.191154	0.128009	0.13571	0.213457	0.133139	0.0887054	0.129383
100.354	16.4792	0.0463404	0.150021	0.209781	0.149651	0.150935	0.231324	0.163071	0.118071	0.16158
100.354	16.5208	0.0687081	0.171204	0.23697	0.177842	0.175913	0.254444	0.199474	0.157627	0.205143
100.354	16.5625	0.120149	0.196376	0.264228	0.209478	0.207266	0.278239	0.233681	0.198913	0.247041
100.354	16.6042	0.100608	0.178209	0.254807	0.202163	0.202791	0.272011	0.228012	0.191641	0.238994
100.354	16.6458	0.0740812	0.156157	0.245304	0.194029	0.198856	0.267103	0.224992	0.184282	0.229823
100.354	16.6875	0.0520141	0.135891	0.240705	0.191867	0.202061	0.269367	0.22917	0.186114	0.229401
100.354	16.7292	0.0370311	0.121824	0.244297	0.200502	0.215487	0.281399	0.242371	0.201828	0.240816
100.354	16.7708	0.0259258	0.110403	0.252315	0.214359	0.233683	0.297611	0.2608	0.221725	0.256224
100.354	16.8125	0.0172597	0.0888366	0.241441	0.210321	0.236006	0.303836	0.264289	0.22582	0.258424
100.354	16.8542	0.00971231	0.0705513	0.22598	0.199365	0.222828	0.294036	0.251713	0.210122	0.242252
100.354	16.8958	0.0151565	0.0905834	0.238972	0.201119	0.221501	0.285785	0.234444	0.18614	0.222723
100.354	16.9375	0.0303944	0.122907	0.251727	0.211462	0.22589	0.280782	0.214805	0.164031	0.200718
100.354	16.9792	0.0705847	0.166385	0.268719	0.238407	0.244942	0.287064	0.209665	0.156728	0.191108
100.354	17.0208	0.115766	0.205493	0.283023	0.263813	0.267055	0.295878	0.214281	0.157119	0.190322
100.354	17.0625	0.109244	0.219725	0.285739	0.272446	0.271646	0.292904	0.206527	0.144596	0.175397
100.354	17.1042	0.109268	0.235055	0.295123	0.293824	0.290075	0.302076	0.225282	0.15339	0.180548
100.354	17.1458	0.11903	0.23829	0.296934	0.301618	0.297623	0.306807	0.240187	0.155375	0.177178
100.354	17.1875	0.158155	0.247985	0.303964	0.306271	0.302973	0.313309	0.252287	0.156855	0.174252
100.354	17.2292	0.111931	0.218242	0.303218	0.291584	0.292613	0.312164	0.250737	0.14849	0.161926
100.354	17.2708	0.0648665	0.165874	0.293893	0.279526	0.293566	0.31717	0.255443	0.152593	0.160161
100.354	17.3125	0.0351108	0.121202	0.277015	0.273963	0.299291	0.320671	0.266828	0.163551	0.161316
100.354	17.3542	0.0200185	0.0849088	0.251923	0.261313	0.29458	0.318694	0.264394	0.157436	0.151627
100.354	17.3958	0.0195472	0.0654637	0.217194	0.222277	0.263779	0.297139	0.22908	0.117881	0.114867
100.354	17.4375	0.0289179	0.065292	0.197452	0.191968	0.237377	0.279819	0.201299	0.0922951	0.0840349
100.354	17.4792	0.0761557	0.117672	0.236969	0.220955	0.259214	0.296073	0.221312	0.106144	0.099385
100.354	17.5208	0.0993976	0.129797	0.235201	0.204115	0.243057	0.292484	0.203103	0.0883361	0.0887407
100.354	17.5625	0.122589	0.150203	0.246207	0.211142	0.245241	0.293292	0.208804	0.087833	0.0934121
100.354	17.6042	0.116294	0.136395	0.221262	0.179291	0.211459	0.26922	0.18181	0.0661981	0.0687757
100.354	17.6458	0.113738	0.125512	0.198524	0.157495	0.185821	0.248456	0.161412	0.0571149	0.0546436
100.354	17.6875	0.185313	0.201084	0.260858	0.225242	0.244847	0.293748	0.228131	0.104109	0.0952452
100.354	17.7292	0.190154	0.201747	0.254234	0.219624	0.235142	0.289652	0.219325	0.0956574	0.080864
100.354	17.7708	0.213505	0.21799	0.265093	0.233186	0.246917	0.296153	0.233573	0.108632	0.0922278
100.354	17.8125	0.233238	0.233838	0.274242	0.24919	0.259976	0.301114	0.249984	0.129514	0.118755
100.354	17.8542	0.214177	0.214876	0.257848	0.234436	0.244772	0.290458	0.23	0.112832	0.111003
100.354	17.8958	0.216943	0.216897	0.264525	0.241343	0.253721	0.294229	0.235069	0.121892	0.124497
100.354	17.9375	0.221751	0.223639	0.274334	0.251074	0.26444	0.299491	0.245448	0.13529	0.13942
100.354	17.9792	0.218162	0.224939	0.272569	0.246344	0.258526	0.288541	0.237279	0.136855	0.140375
100.354	18.0208	0.228063	0.237237	0.279488	0.246323	0.258661	0.288665	0.23689	0.148485	0.152319
100.354	18.0625	0.222165	0.235564	0.280288	0.234727	0.248154	0.284432	0.227561	0.153945	0.160439
100.354	18.1042	0.230233	0.243325	0.290928	0.238142	0.250494	0.288677	0.234101	0.174782	0.185899
100.354	18.1458	0.240517	0.24451	0.293801	0.239444	0.254268	0.289011	0.235342	0.185842	0.202265
100.354	18.1875	0.256708	0.256737	0.302298	0.249138	0.26787	0.298913	0.24805	0.206053	0.227391
100.354	18.2292	0.247249	0.252423	0.294476	0.243526	0.262919	0.295162	0.248251	0.211039	0.235188
100.354	18.2708	0.247051	0.249419	0.288956	0.243735	0.261101	0.295267	0.251701	0.220002	0.243417
100.354	18.3125	0.24727	0.247123	0.282021	0.240105	0.255668	0.291777	0.252477	0.222768	0.248305
100.354	18.3542	0.2582	0.260427	0.289266	0.251467	0.264987	0.296638	0.263565	0.235961	0.264083
100.354	18.3958	0.252554	0.257409	0.289961	0.24965	0.268436	0.292753	0.263244	0.240073	0.26852
100.354	18.4375	0.253817	0.259271	0.295993	0.258825	0.280473	0.296836	0.269265	0.252188	0.279062
100.354	18.4792	0.252405	0.256955	0.295599	0.259729	0.281866	0.298541	0.269318	0.254628	0.278183
100.354	18.5208	0.264117	0.268393	0.301782	0.269854	0.291088	0.307415	0.279082	0.265146	0.285032
100.354	18.5625	0.283775	0.286662	0.313746	0.287653	0.305975	0.321209	0.296159	0.281708	0.300618
100.354	18.6042	0.280771	0.282239	0.310387	0.282908	0.304423	0.319897	0.284472	0.262976	0.295002
100.354	18.6458	0.290872	0.29212	0.320017	0.289918	0.311999	0.326675	0.282189	0.258054	0.302061
100.354	18.6875	0.301273	0.300994	0.328166	0.297313	0.317006	0.330627	0.279598	0.253897	0.30759
100.354	18.7292	0.293682	0.290352	0.319518	0.287981	0.307989	0.320788	0.259803	0.221384	0.291127
100.354	18.7708	0.298344	0.2916	0.320631	0.289251	0.306119	0.320478	0.253015	0.20523	0.285121
100.354	18.8125	0.313233	0.305315	0.333193	0.300364	0.312309	0.330005	0.263292	0.216706	0.293816
100.354	18.8542	0.288023	0.284963	0.315688	0.272866	0.290082	0.312015	0.230663	0.164296	0.266491
100.354	18.8958	0.270897	0.271287	0.305101	0.253344	0.276484	0.303216	0.21859	0.147129	0.258647
100.354	18.9375	0.262062	0.265532	0.302133	0.242913	0.273507	0.302557	0.22648	0.16442	0.266792
100.354	18.9792	0.246808	0.250802	0.291084	0.228349	0.258401	0.292568	0.219382	0.160548	0.254264
100.354	19.0208	0.245795	0.246882	0.287909	0.224203	0.252294	0.292008	0.226549	0.179355	0.25724
100.354	19.0625	0.25756	0.253619	0.291797	0.22838	0.25471	0.298925	0.243766	0.211689	0.275048
100.354	19.1042	0.275343	0.268389	0.29984	0.237979	0.263887	0.308676	0.26496	0.244303	0.296535
100.354	19.1458	0.270372	0.265667	0.298898	0.226818	0.259562	0.307387	0.270283	0.247629	0.297895
100.354	19.1875	0.256076	0.254097	0.292736	0.210639	0.246963	0.29858	0.262733	0.240668	0.290678
100.354	19.2292	0.224779	0.228737	0.272709	0.180627	0.216201	0.274323	0.233836	0.213837	0.268614
100.354	19.2708	0.198416	0.210374	0.258084	0.16357	0.191483	0.256179	0.21533	0.196999	0.253326
100.354	19.3125	0.192082	0.212019	0.258574	0.167821	0.187106	0.254201	0.220278	0.202474	0.254178
100.354	19.3542	0.198951	0.221418	0.264383	0.180439	0.193628	0.261321	0.234354	0.220307	0.262665
100.354	19.3958	0.219608	0.239434	0.279342	0.202498	0.212188	0.277925	0.257706	0.246189	0.279463
100.354	19.4375	0.231312	0.248183	0.287936	0.218089	0.226161	0.290629	0.2749	0.263426	0.292427
100.354	19.4792	0.246559	0.258227	0.298732	0.237219	0.244693	0.30729	0.291044	0.278957	0.305544
100.354	19.5208	0.249008	0.261322	0.300173	0.234317	0.243633	0.304368	0.294097	0.281702	0.30404
100.354	19.5625	0.247209	0.260009	0.2983	0.236799	0.242288	0.300564	0.288419	0.277985	0.299457
100.354	19.6042	0.248155	0.258342	0.296792	0.245478	0.245246	0.300765	0.284843	0.272531	0.295427
100.354	19.6458	0.256466	0.261655	0.299828	0.257455	0.254891	0.307158	0.287266	0.2729	0.295298
100.354	19.6875	0.27413	0.276586	0.311031	0.277067	0.276332	0.320593	0.298643	0.284455	0.304297
100.354	19.7292	0.290995	0.292591	0.322755	0.294717	0.2959	0.333283	0.310291	0.296216	0.314607
100.354	19.7708	0.305533	0.304226	0.332095	0.309612	0.310854	0.342728	0.318211	0.305589	0.323722
100.354	19.8125	0.30107	0.299361	0.330203	0.306958	0.305689	0.341045	0.311477	0.292945	0.312967
100.354	19.8542	0.287093	0.282656	0.314278	0.285663	0.282608	0.324284	0.284126	0.264698	0.294176
100.354	19.8958	0.276924	0.272649	0.304309	0.269355	0.268183	0.309601	0.26107	0.241127	0.281412
100.354	19.9375	0.278	0.27565	0.305071	0.266328	0.271671	0.303892	0.254063	0.233511	0.278581
100.354	19.9792	0.283609	0.282369	0.310241	0.266884	0.274956	0.300396	0.252907	0.233289	0.276543
100.354	20.0208	0.275787	0.274434	0.300946	0.251406	0.25439	0.279874	0.230301	0.211784	0.255126
100.354	20.0625	0.265171	0.266362	0.290766	0.234987	0.226285	0.25341	0.202409	0.182019	0.227184
100.354	20.1042	0.274407	0.272127	0.293268	0.233058	0.210627	0.240897	0.187677	0.165335	0.211282
100.354	20.1458	0.279061	0.271239	0.287507	0.225024	0.191218	0.222285	0.169827	0.149665	0.19135
100.354	20.1875	0.289258	0.277327	0.291533	0.232304	0.193715	0.223735	0.17029	0.151346	0.191748
100.354	20.2292	0.294376	0.279528	0.290602	0.235297	0.193146	0.218566	0.164263	0.143353	0.188798
100.354	20.2708	0.284808	0.269438	0.276046	0.220271	0.163286	0.189039	0.143932	0.11859	0.162636
100.354	20.3125	0.271975	0.258505	0.258952	0.204518	0.129201	0.157279	0.126173	0.097984	0.136514
100.354	20.3542	0.257964	0.245345	0.241733	0.187276	0.104086	0.127812	0.105094	0.0777431	0.115193
100.354	20.3958	0.251597	0.236973	0.234124	0.177066	0.0942057	0.108288	0.0901508	0.0630896	0.102216
100.354	20.4375	0.251649	0.233439	0.235236	0.173702	0.0943234	0.100401	0.0832613	0.0541723	0.0931075
100.354	20.4792	0.261209	0.240084	0.245321	0.181148	0.10543	0.105538	0.0854435	0.052839	0.0913089
100.354	20.5208	0.263019	0.237498	0.241626	0.180132	0.101357	0.0977402	0.0788122	0.0471795	0.0892801
100.354	20.5625	0.261975	0.234234	0.234092	0.175752	0.0982924	0.0906004	0.0725266	0.042927	0.0930788
100.354	20.6042	0.265199	0.235547	0.228373	0.174334	0.104846	0.0918622	0.076012	0.0449809	0.101523
100.354	20.6458	0.271263	0.242854	0.22705	0.177169	0.118858	0.1008	0.0880118	0.056036	0.114613
100.354	20.6875	0.267337	0.239193	0.217081	0.174955	0.121719	0.0983746	0.0887316	0.063742	0.116839
100.354	20.7292	0.266209	0.238555	0.212796	0.177595	0.131428	0.103685	0.0949569	0.0753543	0.122699
100.354	20.7708	0.258972	0.233553	0.205091	0.178881	0.13165	0.100916	0.101806	0.078967	0.121795
100.354	6.5625	0.18815	0.12274	0.0936128	0.140083	0.118921	0.103387	0.141882	0.132223	0.131074
100.354	6.60417	0.174974	0.104316	0.0800867	0.125929	0.108351	0.0919725	0.127263	0.113536	0.1137
100.354	6.64583	0.151972	0.0836598	0.0632259	0.104595	0.0880869	0.0761187	0.104712	0.0908538	0.0895062
100.354	6.6875	0.137358	0.0750281	0.0569855	0.0860154	0.0728948	0.0662513	0.0894052	0.0729968	0.0738082
100.354	6.72917	0.150085	0.086341	0.0684462	0.0894838	0.0767291	0.073664	0.097406	0.0725663	0.0807011
100.354	6.77083	0.162241	0.0968177	0.0764501	0.0941839	0.0796666	0.0788477	0.104084	0.0766572	0.0937213
100.354	6.8125	0.150983	0.0796385	0.0612761	0.0784563	0.0620139	0.0631509	0.0910234	0.0650005	0.0833288
100.354	6.85417	0.156608	0.0824617	0.059421	0.0832609	0.0638945	0.0590987	0.0916587	0.0654256	0.0811169
100.354	6.89583	0.146406	0.073863	0.0466286	0.0704724	0.0504005	0.0488887	0.0790231	0.0529462	0.0728975
100.354	6.9375	0.157683	0.0776819	0.0484265	0.0735681	0.0542612	0.0556292	0.0887744	0.0610288	0.081217
100.354	6.97917	0.177504	0.0869437	0.0576054	0.0838365	0.0627683	0.0706316	0.10748	0.0767886	0.0926611
100.354	7.02083	0.184411	0.0905726	0.0631914	0.0891804	0.0645354	0.0796897	0.116751	0.0851276	0.096942
100.354	7.0625	0.203062	0.108887	0.0826315	0.108199	0.0764591	0.0912169	0.131008	0.0998486	0.109351
100.354	7.10417	0.214107	0.128923	0.102254	0.124482	0.0895658	0.096847	0.138316	0.110332	0.121234
100.354	7.14583	0.197725	0.118886	0.0972393	0.119696	0.0840779	0.0908095	0.123076	0.0978116	0.108865
100.354	7.1875	0.200489	0.126467	0.108726	0.138056	0.10037	0.105309	0.126816	0.0972758	0.111964
100.354	7.22917	0.202706	0.136688	0.122302	0.154265	0.11435	0.11308	0.124712	0.0962602	0.11155
100.354	7.27083	0.204492	0.146454	0.138615	0.16964	0.125056	0.116437	0.120714	0.0964893	0.10991
100.354	7.3125	0.199538	0.1472	0.147517	0.175504	0.126434	0.114558	0.108398	0.090738	0.104894
100.354	7.35417	0.184901	0.133263	0.138917	0.163128	0.122048	0.104361	0.0968479	0.0777215	0.0941349
100.354	7.39583	0.177524	0.125471	0.133802	0.16657	0.126402	0.104043	0.0985858	0.0768124	0.094642
100.354	7.4375	0.167867	0.118018	0.126489	0.165303	0.122256	0.0987175	0.0959327	0.0752056	0.0999014
100.354	7.47917	0.181762	0.137151	0.142803	0.180013	0.134255	0.105807	0.109085	0.0964875	0.123236
100.354	7.52083	0.187238	0.151722	0.156138	0.183771	0.136579	0.108423	0.113464	0.107134	0.131211
100.354	7.5625	0.186477	0.155931	0.156762	0.174438	0.123912	0.104497	0.109978	0.103398	0.129882
100.354	7.60417	0.209102	0.172526	0.170331	0.180589	0.135257	0.112696	0.121433	0.118116	0.148218
100.354	7.64583	0.244721	0.204548	0.197924	0.205589	0.165617	0.135897	0.145341	0.150925	0.182443
100.354	7.6875	0.227571	0.187081	0.175343	0.184406	0.147683	0.119727	0.12883	0.134099	0.163977
100.354	7.72917	0.21402	0.17321	0.154258	0.16597	0.130417	0.104842	0.115406	0.11898	0.144567
100.354	7.77083	0.207648	0.168417	0.143836	0.156885	0.127449	0.102627	0.112684	0.113698	0.137886
100.354	7.8125	0.212965	0.176026	0.148053	0.160467	0.13982	0.11333	0.120487	0.119982	0.145687
100.396	13.5208	0.210855	0.107838	0.0942166	0.185299	0.203759	0.0816172	0.0269653	0.0281819	0.04399
100.396	13.5625	0.212479	0.10644	0.0907803	0.185243	0.201514	0.0714438	0.0241894	0.025534	0.0359615
100.396	13.6042	0.207063	0.0959866	0.0872159	0.184653	0.19845	0.074799	0.0225596	0.0216125	0.0326411
100.396	13.6458	0.178961	0.079223	0.0687403	0.159725	0.168287	0.0422741	0.0139052	0.0124582	0.0216385
100.396	13.6875	0.177767	0.0864697	0.0703013	0.163629	0.172235	0.0330061	0.0145808	0.0130169	0.0174698
100.396	13.7292	0.174028	0.0877855	0.0686608	0.165767	0.175296	0.0287175	0.0146533	0.0136662	0.0201112
100.396	13.7708	0.167013	0.0708496	0.0574388	0.169329	0.173193	0.0276457	0.0153124	0.0125684	0.0256838
100.396	13.8125	0.14754	0.0609824	0.0492156	0.159883	0.163693	0.0254667	0.0160504	0.0105659	0.0209754
100.396	13.8542	0.127039	0.0550284	0.0466775	0.153781	0.165852	0.0235541	0.0158031	0.00896818	0.0144273
100.396	13.8958	0.162181	0.0810917	0.0740495	0.179495	0.195812	0.0485785	0.0337869	0.0182747	0.0190932
100.396	13.9375	0.200889	0.112528	0.10597	0.211194	0.22123	0.0770823	0.0567752	0.0327551	0.0273344
100.396	13.9792	0.200244	0.114918	0.109576	0.209577	0.214073	0.0738408	0.0505952	0.0289101	0.022789
100.396	14.0208	0.198376	0.114901	0.113339	0.20702	0.205175	0.0693636	0.0445122	0.0239553	0.0191301
100.396	14.0625	0.201109	0.119691	0.122621	0.207879	0.200548	0.0688517	0.0416084	0.0207612	0.0172345
100.396	14.1042	0.211179	0.134382	0.141232	0.216501	0.20464	0.0765927	0.0437787	0.0202889	0.0181659
100.396	14.1458	0.210515	0.139368	0.149558	0.215921	0.199509	0.0807676	0.0441097	0.0180184	0.0176863
100.396	14.1875	0.204508	0.136931	0.149283	0.210953	0.193484	0.0754982	0.0344265	0.0140264	0.0171886
100.396	14.2292	0.180243	0.118218	0.131284	0.190101	0.176693	0.0572497	0.0188145	0.00938578	0.0135494
100.396	14.2708	0.197424	0.140287	0.151293	0.200097	0.194378	0.0728478	0.0229117	0.0127297	0.0180826
100.396	14.3125	0.181685	0.123741	0.135776	0.186582	0.175261	0.0665068	0.0207565	0.0110565	0.0155166
100.396	14.3542	0.173809	0.111651	0.124191	0.174826	0.156692	0.0657525	0.0245103	0.0131184	0.0136294
100.396	14.3958	0.20978	0.154014	0.159524	0.20439	0.181921	0.0999082	0.0518175	0.031483	0.0267989
100.396	14.4375	0.195775	0.150524	0.154676	0.194566	0.177322	0.101699	0.0520663	0.0288012	0.0250528
100.396	14.4792	0.171049	0.13843	0.141817	0.174843	0.164607	0.0960963	0.0485223	0.0207499	0.0191824
100.396	14.5208	0.138388	0.118757	0.122352	0.14721	0.145609	0.0819213	0.0442322	0.0122921	0.0140009
100.396	14.5625	0.104978	0.093569	0.0976287	0.116692	0.119619	0.0660331	0.0417192	0.00747204	0.00995461
100.396	14.6042	0.105171	0.0902678	0.0938716	0.118052	0.121278	0.0717955	0.0546826	0.00826597	0.00908898
100.396	14.6458	0.127156	0.102636	0.113032	0.136664	0.14479	0.0909949	0.0722892	0.0140313	0.0126874
100.396	14.6875	0.117152	0.0880948	0.0997554	0.123997	0.131002	0.0774993	0.0531275	0.0114435	0.0101719
100.396	14.7292	0.12726	0.102895	0.113239	0.137221	0.146727	0.0816095	0.0469762	0.0121112	0.0108836
100.396	14.7708	0.124469	0.101895	0.11224	0.136149	0.146366	0.0735497	0.0347867	0.0103325	0.0104416
100.396	14.8125	0.114628	0.0921197	0.103772	0.128296	0.1369	0.0605944	0.023853	0.00788632	0.00973954
100.396	14.8542	0.119615	0.0971348	0.109485	0.133899	0.143736	0.0584371	0.0206318	0.00752139	0.012025
100.396	14.8958	0.108757	0.0973047	0.113182	0.138416	0.151772	0.0523458	0.017294	0.00731043	0.0164523
100.396	14.9375	0.11357	0.105409	0.123547	0.147514	0.15988	0.0572071	0.0194984	0.00922229	0.0174623
100.396	14.9792	0.150195	0.137854	0.156192	0.179417	0.186583	0.0883274	0.0347099	0.0194938	0.0277525
100.396	15.0208	0.175624	0.160522	0.177889	0.206224	0.207283	0.115542	0.0594654	0.0320162	0.0367887
100.396	15.0625	0.208187	0.192722	0.208584	0.24157	0.236321	0.151629	0.0993973	0.0548796	0.0582216
100.396	15.1042	0.211691	0.199846	0.218948	0.256212	0.2464	0.168778	0.124161	0.0686504	0.0716567
100.396	15.1458	0.203154	0.186418	0.211104	0.260805	0.25274	0.175218	0.13848	0.0773084	0.0780274
100.396	15.1875	0.222243	0.197847	0.227987	0.286557	0.280013	0.206584	0.17952	0.108375	0.109127
100.396	15.2292	0.213291	0.186238	0.220067	0.285439	0.278055	0.209038	0.188682	0.113616	0.117879
100.396	15.2708	0.198774	0.172411	0.204046	0.274735	0.263961	0.199536	0.186682	0.114956	0.117007
100.396	15.3125	0.171297	0.147216	0.177938	0.254959	0.239271	0.177338	0.173977	0.112457	0.109617
100.396	15.3542	0.211973	0.182303	0.216787	0.270782	0.261495	0.217099	0.227337	0.174719	0.177874
100.396	15.3958	0.219601	0.182499	0.21711	0.269556	0.262236	0.227139	0.240044	0.195183	0.203806
100.396	15.4375	0.236716	0.191618	0.21793	0.276363	0.273797	0.243871	0.254512	0.209383	0.219348
100.396	15.4792	0.282716	0.23652	0.254333	0.304919	0.30734	0.285055	0.291531	0.256355	0.259738
100.396	15.5208	0.298113	0.254018	0.267653	0.307082	0.311061	0.293347	0.29975	0.268338	0.26858
100.396	15.5625	0.300377	0.257768	0.267976	0.299907	0.30283	0.287271	0.291848	0.254188	0.255245
100.396	15.6042	0.302429	0.261266	0.26767	0.298197	0.297635	0.282583	0.283226	0.238929	0.241244
100.396	15.6458	0.318177	0.281688	0.283174	0.306919	0.30512	0.2933	0.286912	0.24318	0.248556
100.396	15.6875	0.335807	0.299626	0.297921	0.319479	0.317411	0.304612	0.291298	0.248904	0.257659
100.396	15.7292	0.342601	0.302978	0.29709	0.320035	0.319466	0.3045	0.28274	0.233378	0.246891
100.396	15.7708	0.323668	0.29162	0.284214	0.304205	0.305749	0.29138	0.260213	0.193975	0.211377
100.396	15.8125	0.298142	0.283705	0.280113	0.294406	0.296172	0.285443	0.246589	0.16861	0.184014
100.396	15.8542	0.274268	0.28213	0.287198	0.292909	0.291637	0.287964	0.245193	0.166532	0.176977
100.396	15.8958	0.255138	0.28803	0.305188	0.30124	0.2976	0.30091	0.260593	0.187624	0.196845
100.396	15.9375	0.231905	0.282931	0.309804	0.305004	0.302183	0.30824	0.273931	0.214238	0.225594
100.396	15.9792	0.217149	0.268909	0.293588	0.279787	0.278814	0.292515	0.248557	0.19141	0.214348
100.396	16.0208	0.212829	0.243644	0.256849	0.230669	0.230911	0.257228	0.197978	0.143524	0.172968
100.396	16.0625	0.177381	0.220633	0.237495	0.204241	0.205548	0.239445	0.176253	0.128626	0.163117
100.396	16.1042	0.144789	0.196399	0.215373	0.174202	0.178006	0.22202	0.158027	0.114906	0.152083
100.396	16.1458	0.102029	0.176873	0.203464	0.154641	0.164325	0.219865	0.157369	0.115136	0.154691
100.396	16.1875	0.0551939	0.164828	0.201289	0.14886	0.162489	0.23072	0.169202	0.129074	0.171052
100.396	16.2292	0.0415691	0.142875	0.186203	0.133317	0.151219	0.233498	0.169096	0.133313	0.176113
100.396	16.2708	0.0454725	0.148458	0.192354	0.133834	0.150166	0.237154	0.170746	0.124337	0.166828
100.396	16.3125	0.0514447	0.141388	0.183662	0.119275	0.135429	0.225151	0.150952	0.0938472	0.137306
100.396	16.3542	0.0554239	0.136751	0.173478	0.102049	0.116134	0.202893	0.116821	0.0581559	0.102405
100.396	16.3958	0.0638304	0.139777	0.178816	0.108648	0.118735	0.202343	0.111321	0.0523514	0.0933021
100.396	16.4375	0.0733949	0.143652	0.192246	0.127728	0.133364	0.214422	0.129659	0.070321	0.108278
100.396	16.4792	0.0486031	0.136462	0.192363	0.127182	0.125116	0.212037	0.138407	0.0871029	0.131123
100.396	16.5208	0.0735145	0.157098	0.220052	0.155993	0.147855	0.237379	0.179344	0.131247	0.181941
100.396	16.5625	0.118969	0.182947	0.249692	0.190604	0.181136	0.26541	0.220015	0.180804	0.233052
100.396	16.6042	0.120614	0.181505	0.255936	0.201092	0.193543	0.272138	0.230965	0.195405	0.246327
100.396	16.6458	0.087526	0.156858	0.245239	0.192108	0.188506	0.264893	0.224627	0.185384	0.234479
100.396	16.6875	0.0587829	0.134597	0.239292	0.188199	0.190398	0.26443	0.225458	0.184463	0.230882
100.396	16.7292	0.0377215	0.116884	0.237122	0.190678	0.19774	0.271081	0.231859	0.192704	0.236337
[truncated: 58,966 more rows]
