# Supplementary material for: Model-based spatial-temporal mapping of opisthorchiasis in endemic countries of Southeast Asia
Source: eLife. 2021 Jan 12;10:e59755. doi: 10.7554/eLife.59755 (PMC7870142; doi:10.7554/eLife.59755)
Supplement: Figure 5—source data 1. [file elife-59755-fig5-data1.xlsx]

## Sheet: Changes of infection risk
Longitude	Latitude	between 1978 and 2018 (%)	between 1978 and 1983 (%)	between 1983 and 1988 (%)	between 1988 and 1993 (%)	between 1993 and 1998 (%)	between 1998 and 2003 (%)	between 2003 and 2008 (%)	between 2008 and 2013 (%)	between 2013 and 2018 (%)
100.021	12.8958	-93.0634	-11.5405	11.5846	13.3954	-18.2221	-65.9957	-73.0863	-24.1323	9.14558
100.021	12.9375	-93.9385	-7.03123	7.63981	17.3056	-15.4477	-66.1317	-75.0886	-33.3688	8.63166
100.021	12.9792	-93.104	-18.4626	17.985	17.5545	-9.87248	-67.1182	-75.5962	-29.0899	18.9026
100.021	13.0208	-92.6076	-17.0154	11.8486	21.0296	-7.1933	-66.7436	-72.8704	-34.5621	20.0984
100.021	13.0625	-91.8045	-18.0346	18.3486	26.9195	-13.9877	-63.8764	-76.6664	-28.5642	28.5297
100.021	13.1042	-92.2749	-22.9007	13.7447	37.2144	-2.66301	-65.7434	-78.6291	-31.3311	31.196
100.021	13.1458	-93.5407	-32.6579	12.0236	50.399	-0.476537	-68.1572	-79.7537	-18.122	8.36636
100.021	13.3958	-93.2115	-34.8373	-0.845142	72.1485	1.42685	-77.1397	-82.6676	17.6431	29.092
100.021	13.4375	-93.7453	-35.3542	-6.27748	74.9235	-2.66391	-79.0722	-81.4038	21.6109	28.1099
100.021	13.4792	-93.7634	-43.8071	1.62074	71.0692	-5.45377	-78.3538	-80.3569	18.5612	33.9468
100.021	13.5208	-93.1976	-41.4099	-5.14479	82.9153	-13.0494	-79.7588	-76.968	32.7115	24.3879
100.021	13.5625	-92.656	-42.2889	-2.2691	86.0071	-25.3451	-77.2626	-74.6744	38.1167	17.8982
100.021	13.6042	-92.9163	-44.0554	-5.65429	75.2	-18.647	-79.5634	-72.4051	52.991	9.13637
100.021	13.6458	-92.0171	-44.321	8.78774	61.9812	-21.9715	-78.0852	-73.6015	64.5475	9.53811
100.021	13.6875	-92.7185	-41.6017	8.50497	71.0993	-27.1802	-79.954	-74.2307	75.5071	1.73073
100.021	13.7292	-92.0066	-37.2905	5.78038	65.2903	-27.2397	-77.4457	-73.1	45.7483	13.3103
100.021	13.7708	-92.8767	-35.4628	3.76819	66.6363	-24.6413	-79.6495	-68.8325	22.4014	9.10448
100.021	13.8125	-93.2601	-42.4638	7.82746	72.0293	-19.1666	-79.2645	-69.0224	31.7107	-7.6562
100.021	13.8542	-93.052	-42.0342	13.0484	76.137	-13.2684	-77.4846	-69.6929	10.6643	-8.09015
100.021	13.8958	-94.1696	-42.0684	6.11068	88.8912	-3.86431	-79.4121	-67.9187	1.70695	-22.2472
100.021	13.9375	-95.064	-41.9133	2.03002	109.906	-13.4296	-79.4151	-63.9058	-4.57032	-35.3586
100.021	13.9792	-95.2279	-42.1183	12.4784	97.1243	-11.1668	-78.6699	-62.7183	-13.6857	-39.0169
100.021	14.0208	-95.4297	-38.5429	8.68274	89.2491	-16.5832	-72.5772	-62.0549	-31.8398	-38.888
100.021	14.0625	-95.6085	-37.7315	14.7413	77.7604	-9.37091	-70.0106	-61.6083	-39.731	-45.0176
100.021	14.1042	-95.6187	-34.7904	21.1754	69.76	-15.8851	-63.304	-61.4957	-45.4114	-49.6567
100.021	14.1458	-96.2409	-32.9701	17.6715	56.127	-14.5952	-55.7799	-56.6644	-57.6064	-56.003
100.021	14.1875	-96.4652	-25.7312	16.3324	40.8269	-10.7895	-52.6887	-50.3174	-67.5448	-57.3125
100.021	14.2292	-96.2927	-30.6532	15.8101	36.8247	-7.53845	-41.9389	-53.8444	-65.7317	-60.2667
100.021	14.2708	-96.2678	-27.3515	13.5645	32.8228	-11.6781	-38.0807	-44.12	-69.9033	-62.9696
100.021	14.3125	-95.7709	-20.5619	6.67094	30.7	-9.53005	-36.776	-35.3053	-72.6493	-62.2709
100.021	14.3542	-95.8042	-23.6968	0.358057	39.0398	-12.0216	-34.9103	-25.1286	-74.8195	-63.4985
100.021	14.3958	-95.8404	-29.2504	5.77749	31.1274	-6.86965	-22.6157	-26.8686	-76.1323	-66.3033
100.021	14.4375	-95.4549	-22.8858	4.0646	34.9019	-10.5614	-17.0256	-29.5038	-77.1924	-64.8138
100.021	14.4792	-95.7827	-17.3409	0.733096	37.7215	-9.09088	-20.1179	-29.7852	-76.606	-69.1698
100.021	14.5208	-96.09	-18.1799	2.88849	33.8837	-10.8216	-16.299	-29.2116	-77.6721	-70.5951
100.021	14.5625	-96.2838	-23.194	-1.4424	42.9415	-8.52541	-17.7073	-22.0794	-79.4283	-71.5379
100.021	14.6042	-96.5639	-20.0603	4.52215	44.3928	-9.88961	-19.0097	-27.3304	-79.8025	-73.4119
100.021	14.6458	-96.6793	-5.39865	-10.3672	49.5979	-2.50968	-24.6755	-25.9816	-81.9696	-73.2887
100.021	14.6875	-97.1848	-8.39175	-8.39409	41.3393	-7.08791	-22.3136	-35.9072	-81.3246	-72.5274
100.021	14.7292	-97.4215	-13.0833	-5.41084	39.5489	-7.77884	-27.7437	-40.3923	-80.7777	-70.5636
100.021	14.7708	-97.6719	-16.95	-17.027	50.6399	-8.36662	-28.3656	-43.5384	-80.6893	-68.663
100.021	14.8125	-97.8035	-21.7177	-9.11194	37.1655	1.59533	-37.1983	-40.4763	-81.053	-68.7214
100.021	14.8542	-97.972	-19.5836	-11.7571	28.5739	1.25994	-39.5624	-46.6569	-78.0475	-68.9839
100.021	14.8958	-97.8305	-15.3742	-15.3188	45.3599	-5.65655	-39.9048	-48.9596	-78.4583	-66.59
100.021	14.9375	-97.6273	-18.1135	-12.2054	59.9022	-12.4939	-44.7445	-50.5711	-77.8662	-60.983
100.021	14.9792	-97.41	-9.16731	-6.3186	48.6038	-9.9897	-51.2096	-46.7335	-79.1035	-58.0997
100.021	15.0208	-97.2464	-9.615	-5.92095	53.7749	-10.7238	-53.0158	-48.701	-75.4683	-60.107
100.021	15.0625	-96.8109	-14.7772	-8.53759	92.8435	-23.1029	-56.0664	-43.3619	-72.7925	-59.2473
100.021	15.1042	-96.2452	-17.2588	-16.0267	105.272	-23.9361	-54.9267	-41.4328	-70.7561	-55.1665
100.021	15.1458	-93.8698	-14.5668	-6.29784	115.478	-25.0227	-57.8289	-31.7841	-65.6938	-51.9721
100.021	15.1875	-89.6405	-13.661	-11.232	140.908	-17.9129	-56.881	-22.4334	-56.8277	-52.6632
100.021	15.2292	-80.4674	-16.7546	-3.15239	126.745	-5.15754	-56.2521	-15.2613	-48.5878	-40.8896
100.021	15.2708	-54.8446	-15.93	3.38155	120.093	-6.24562	-47.7756	6.43313	-34.5916	-30.7462
100.021	15.3125	-9.45674	-18.9695	8.02939	139.309	-8.76884	-42.4737	27.9548	-22.672	-16.7653
100.021	15.3542	48.0722	-20.7093	3.5725	152.652	-5.77448	-32.8591	31.024	-9.96236	-4.37872
100.021	15.3958	122.818	-22.121	6.18659	176.767	-1.43309	-36.0127	55.0527	3.14264	-3.48326
100.021	15.4375	150.293	-20.2399	7.07309	183.752	-7.83865	-28.8398	41.1658	14.1363	-2.25269
100.021	15.4792	201.703	-23.9292	17.6294	185.643	-2.5921	-31.1486	56.2312	11.3463	1.17496
100.021	15.5208	166.139	-28.7411	24.6052	194.167	-3.18743	-30.6933	46.8786	9.16635	-5.29212
100.021	15.5625	168.376	-17.5558	12.9353	181.907	-1.99988	-28.9203	39.5722	7.29633	-1.98527
100.021	15.6042	148.603	-27.3536	10.5946	240.211	-2.22895	-29.992	36.2427	11.2779	-12.3545
100.021	15.6458	91.3086	-35.3896	12.501	188.175	1.57672	-30.5232	43.5564	2.72361	-12.241
100.021	15.6875	49.0757	-36.7622	0.899102	173.161	-1.95817	-26.6959	31.372	-1.76336	-7.78348
100.021	15.7292	-9.67518	-37.0361	-5.54601	122.814	-3.00694	-25.6713	22.644	-7.01735	-17.09
100.021	15.7708	-42.6728	-36.7918	-12.1056	87.834	3.34441	-31.1131	20.4668	-18.148	-21.7415
100.021	15.8125	-56.8099	-34.8469	-14.8277	52.648	-4.03476	-23.0597	2.03367	-19.254	-16.1841
100.021	15.8542	-67.6322	-33.03	-21.2112	38.0948	-8.67971	-12.7863	-5.16557	-28.4351	-17.8189
100.021	15.8958	-70.5701	-34.1564	-19.1358	33.8616	-5.33023	-3.18012	-14.1994	-28.4531	-26.6152
100.021	15.9375	-67.1164	-33.9272	-14.194	22.1751	-6.10692	14.8717	-21.4652	-24.3097	-25.953
100.021	15.9792	-65.1606	-28.2902	-21.0561	5.97912	3.9565	16.2752	-14.624	-31.6913	-17.6235
100.021	16.0208	-66.208	-32.623	-20.9973	4.7656	5.65285	43.744	-23.4139	-33.4775	-21.6835
100.021	16.0625	-64.3209	-30.9542	-20.0354	-9.59134	21.136	57.7769	-24.3989	-37.8445	-20.4125
100.021	16.1042	-61.8448	-35.0374	-15.3822	-10.1667	21.4875	70.7312	-24.6993	-42.933	-13.3113
100.021	16.1458	-52.772	-33.0588	-5.32466	-14.1025	24.0195	112.657	-26.5732	-46.5089	-16.2504
100.021	16.1875	11.6368	-27.7869	26.174	1.53666	44.7052	130.09	-24.8595	-42.312	-16.3903
100.021	16.2292	218.203	-11.7124	84.307	2.91535	82.6833	165.637	-29.2336	-38.4279	-10.1363
100.021	16.2708	298.029	-6.80416	78.6386	20.4695	83.4307	197.578	-35.7361	-33.5113	-14.9102
100.021	16.3125	334.75	-18.3225	109.702	9.8544	95.2325	260.352	-45.4696	-30.825	-12.9337
100.021	16.3542	221.642	-22.5802	119.093	-25.0037	117.018	240.795	-45.8251	-33.7555	-4.73912
100.021	16.3958	45.2159	-31.8029	64.147	-34.5092	86.2617	212.045	-43.9579	-34.68	-6.90351
100.021	16.4375	-33.3326	-38.7181	21.6031	-37.7103	60.7565	183.177	-46.4067	-34.6931	-9.8587
100.021	16.4792	-52.9684	-36.1923	24.6179	-43.0303	32.5711	195.883	-54.2258	-40.2253	-3.26471
100.021	16.5208	-70.7459	-33.1419	12.3405	-45.924	18.1234	180.147	-51.134	-50.3051	-10.3709
100.021	16.5625	-81.4255	-29.6066	1.81331	-47.8425	22.8391	155.465	-54.9106	-51.3567	-27.8064
100.021	16.6042	-86.547	-28.5021	0.63269	-44.4037	12.9965	128.004	-55.8631	-58.7983	-28.2176
100.021	16.6458	-90.2102	-28.0903	-4.98448	-45.3766	13.6594	111.46	-59.8173	-60.8843	-30.5633
100.021	16.6875	-93.4705	-22.8545	-18.1394	-38.2213	6.52962	89.2887	-60.1147	-68.6444	-33.6362
100.021	16.7292	-91.2074	-16.7267	1.27707	-38.0146	10.549	79.1841	-60.238	-69.5046	-29.975
100.021	16.7708	-93.9011	-16.3743	0.980738	-37.5857	7.40499	54.4142	-63.9824	-69.73	-36.0048
100.021	16.8125	-95.9417	-12.1986	-9.77301	-40.4365	0.0966938	49.4006	-66.8331	-71.3307	-39.5173
100.021	16.8542	-97.1971	-14.6612	-3.34339	-44.4895	-0.634459	30.5834	-68.6081	-73.4387	-43.4204
100.021	16.8958	-97.7926	-15.065	-0.549332	-47.4582	1.9575	26.4369	-70.416	-75.8158	-46.0738
100.021	16.9375	-98.2192	-11.0206	1.15355	-40.5033	-10.1845	25.5204	-74.0999	-75.1695	-54.134
100.021	16.9792	-98.5781	-10.2454	8.71098	-38.6552	-16.6728	18.5095	-74.2939	-78.7109	-56.0415
100.021	17.0208	-98.6675	-1.82142	13.5667	-41.1511	-3.57608	5.70534	-75.5133	-82.7607	-52.8001
100.021	17.0625	-98.6873	3.28814	22.974	-34.3624	-13.3022	7.06402	-75.3595	-83.6571	-57.8772
100.021	17.1042	-98.5913	7.44467	33.0394	-32.1337	-13.9917	-2.42513	-76.0805	-83.7871	-55.3816
100.021	17.1458	-98.3506	16.6693	46.8653	-34.7772	-14.9085	7.39217	-76.9762	-84.0794	-55.9395
100.021	17.1875	-98.2529	27.0177	54.7231	-31.3677	-17.7288	11.7998	-78.9461	-85.7865	-52.941
100.021	17.2292	-98.2766	22.7579	82.6055	-31.7538	-14.7961	10.2906	-80.8945	-86.6087	-53.1431
100.021	17.2708	-97.9325	63.6125	78.3024	-29.0463	-4.34682	-1.97642	-80.4042	-86.9291	-58.4082
100.021	17.3125	-97.5727	50.4429	118.496	-24.1924	-5.94769	2.25394	-81.5767	-86.1008	-60.4457
100.021	17.3542	-96.8723	70.1314	119.938	-21.0731	-4.11056	0.576265	-79.9159	-86.6005	-59.1954
100.021	17.3958	-96.1847	82.3201	129.8	-19.3914	-0.877112	6.5831	-81.1727	-87.2201	-55.5587
100.021	17.4375	-95.7208	90.7292	154.875	-12.6957	-0.132424	5.26662	-80.7553	-87.6342	-59.6979
100.021	17.4792	-95.2608	72.6669	181.668	-19.5137	1.72868	6.67181	-79.4939	-86.9349	-58.3562
100.021	17.5208	-93.9562	85.1584	143.019	-15.2605	0.322818	7.27095	-76.3797	-87.0705	-51.773
100.021	17.5625	-92.5174	94.4555	135.324	-18.8884	8.9323	-1.07945	-74.2563	-85.3183	-50.5017
100.021	17.6042	-90.8011	95.2844	144.533	-18.8436	9.60499	7.94686	-72.974	-84.9981	-50.5191
100.021	17.6458	-88.1524	117.59	122.777	-10.7265	-1.527	15.6806	-70.5096	-83.0754	-51.8473
100.021	17.6875	-86.7362	90.7585	137.43	-7.56422	1.0834	19.3382	-73.839	-82.0739	-43.9973
100.021	17.7292	-82.1896	94.0025	168.928	-20.0946	-7.4394	44.9527	-73.505	-78.4281	-44.2879
100.021	17.7708	-80.1423	90.95	146.865	-22.1965	-7.29399	44.8205	-71.3486	-71.8746	-49.9541
100.021	17.8125	-75.443	71.9118	148.767	-24.8863	2.92584	40.8213	-64.9935	-68.7851	-51.7326
100.021	17.8542	-66.0467	47.5224	156.624	-24.8891	3.53446	42.3021	-61.369	-64.519	-40.8717
100.021	17.8958	-57.3875	47.911	125.683	-18.1333	1.48891	46.2211	-52.6394	-64.9174	-36.7598
100.021	17.9375	-50.9203	33.0637	139.745	-29.8634	14.233	48.8068	-46.2438	-65.5324	-30.3543
100.021	17.9792	-31.5593	41.8401	126.652	-24.7206	12.2617	38.412	-39.2187	-60.3043	-24.567
100.021	18.0208	-31.5159	26.1833	130.167	-27.0109	4.63261	42.3697	-42.8448	-52.0295	-20.9008
100.021	18.0625	-16.8482	44.8408	132.291	-27.1153	-3.99994	59.6596	-39.852	-51.4463	-24.2465
100.021	18.1042	7.04201	55.9162	127.207	-29.0305	-7.29594	69.3931	-38.3789	-44.115	-21.268
100.021	18.1458	15.0085	49.0879	92.1085	-26.8222	6.73769	71.0403	-37.4991	-46.3781	-10.3156
100.021	18.1875	19.4754	44.4441	107.048	-34.5814	9.98001	66.7809	-39.5013	-36.3252	-13.5763
100.021	18.2292	30.5992	48.2796	111.108	-37.6855	2.99934	68.3368	-35.1603	-33.2776	-10.7435
100.021	18.2708	35.8606	33.3097	89.285	-33.1006	4.01961	57.2563	-34.1695	-30.531	7.58507
100.021	18.3125	45.1391	35.5218	91.2307	-36.8306	7.69359	78.5345	-43.5411	-23.0524	6.1383
100.021	18.3542	50.1492	34.9306	87.2845	-36.3924	2.56003	85.454	-44.294	-13.0631	1.41015
100.021	18.3958	68.739	31.6088	74.3003	-31.5672	0.432573	83.8611	-40.5388	-19.1539	21.0909
100.021	18.4375	103.959	45.336	56.7828	-31.2068	7.87042	78.5674	-41.2698	-14.8309	35.045
100.021	18.4792	110.504	31.375	70.4033	-37.4261	6.90302	103.467	-46.0453	-1.90669	30.534
100.021	18.5208	94.1985	33.0711	79.3258	-43.1673	11.1899	82.762	-48.5467	9.64709	24.899
100.021	18.5625	78.8305	37.3532	63.3051	-44.3321	24.1656	79.5677	-57.0146	16.498	28.2713
100.021	18.6042	88.7142	29.0559	63.5413	-45.8719	32.0126	72.2248	-56.1886	13.261	46.419
100.021	18.6458	93.666	49.0654	35.0263	-47.6343	39.1381	90.5721	-60.4794	15.4864	51.828
100.021	18.6875	52.2697	29.777	42.7475	-48.8809	34.0639	89.1914	-56.7326	-1.20748	48.3085
100.021	18.7292	57.2371	41.1445	48.9528	-53.211	34.8331	69.5123	-58.4082	-1.24332	70.2657
100.021	18.7708	58.6651	31.4136	73.1408	-52.8527	13.6993	96.0872	-61.9288	-2.10437	77.9992
100.021	18.8125	17.1405	24.0852	82.3462	-57.6388	14.7707	100.029	-62.2818	-5.44864	49.2724
100.021	18.8542	15.8056	36.1922	62.6038	-58.7484	8.30036	110.399	-61.7224	-9.57165	60.7246
100.021	18.8958	4.20099	36.7641	46.3577	-63.5802	30.1274	106.945	-62.5128	-14.7089	66.0109
100.021	18.9375	0.867978	27.4424	53.0833	-65.1631	52.1707	109.025	-67.5637	-11.8691	63.2241
100.021	18.9792	-4.01053	44.9015	50.3161	-63.7388	40.012	107.309	-68.5251	-7.60563	43.982
100.021	19.0208	-11.53	47.4716	38.7734	-64.5857	36.6793	120.439	-62.1428	-19.1559	32.3775
100.021	19.0625	1.87305	49.1671	40.8338	-62.4537	27.7683	127.216	-59.783	-23.9532	45.4654
100.021	19.1042	-10.2228	37.6832	42.2157	-61.506	25.5561	127.76	-53.6979	-28.4486	25.7218
100.021	19.1458	0.0812034	42.7766	41.746	-62.7073	32.5282	128.488	-50.7756	-23.4792	16.2598
100.021	19.1875	5.0138	43.7597	42.8364	-63.5608	30.4881	162.144	-50.9546	-29.0375	17.8864
100.021	19.2292	10.0526	28.298	57.8455	-63.6289	34.8959	154.574	-45.0806	-28.6149	10.9801
100.021	19.2708	21.8821	30.5065	61.3811	-60.8654	24.3042	171.626	-37.5817	-29.1652	-0.944625
100.021	19.3125	25.5465	36.3912	64.6361	-56.14	20.6288	148.17	-33.481	-29.6316	-9.02942
100.021	19.3542	58.7357	68.1581	64.1021	-55.4129	19.9102	179.866	-33.52	-30.2307	-17.1159
100.021	19.3958	49.8631	58.7583	69.932	-56.0444	25.4304	173.432	-30.5997	-34.3762	-19.0913
100.021	19.4375	75.9841	61.0145	60.1521	-49.9867	23.5377	163.144	-28.8735	-33.0421	-11.8617
100.021	19.4792	54.7824	33.2295	77.3435	-48.1701	14.188	165.445	-31.3077	-29.7968	-13.5301
100.021	19.5208	60.1774	37.3021	61.9677	-50.4189	33.4724	162.308	-35.8938	-23.921	-14.9231
100.021	19.5625	45.3518	23.3826	83.3613	-55.4236	39.8438	172.738	-34.1457	-28.5897	-19.6438
100.021	19.6042	65.4834	27.9909	76.3333	-46.3552	31.8943	158.701	-34.3251	-29.5113	-13.4694
100.021	19.6458	63.4053	34.1577	60.5092	-39.1346	25.9714	146.147	-34.0909	-28.7525	-14.3755
100.021	19.6875	36.6687	39.8203	49.011	-41.6379	35.898	138.8	-31.6401	-34.1501	-23.0612
100.021	19.7292	16.208	40.1359	50.9215	-40.4876	36.8965	126.708	-31.4365	-39.4645	-28.3252
100.021	19.7708	18.4071	41.6964	60.9871	-37.263	35.9402	130.798	-33.0545	-44.6559	-28.8245
100.021	19.8125	-2.12682	52.6157	50.3458	-34.3851	31.1022	139.22	-37.9105	-47.2431	-36.7202
100.021	19.8542	-12.1255	46.4709	50.438	-37.7525	37.2704	140.631	-37.4332	-52.4213	-34.8451
100.021	19.8958	-10.843	23.013	62.5262	-35.0543	31.9094	144.027	-38.8071	-51.2364	-28.5142
100.021	19.9375	-11.177	31.8234	57.7105	-33.612	35.7338	137.782	-41.6648	-49.1484	-32.7827
100.021	19.9792	15.0605	42.5673	59.7555	-30.6483	35.6569	119.419	-37.1274	-47.812	-25.4161
100.021	20.0208	16.7299	36.5678	62.0985	-27.2746	32.2268	124.015	-37.0656	-46.3339	-27.5257
100.021	20.0625	29.95	34.6664	65.8045	-28.4342	31.1351	145.518	-34.7169	-50.3027	-22.1464
100.021	20.1042	5.35005	35.1541	64.0736	-27.3978	31.6263	126.896	-35.5416	-50.5969	-31.1959
100.021	20.1458	2.36936	42.471	86.9762	-37.0512	31.7383	100.682	-35.0644	-51.5426	-26.6152
100.021	20.1875	-4.82558	37.7502	66.9392	-25.8213	20.3813	88.1561	-39.6459	-49.87	-18.5842
100.021	20.2292	-17.9038	35.9273	69.0169	-35.6753	22.6802	70.5721	-36.5039	-51.3882	-13.9922
100.021	20.2708	-25.0566	36.1036	60.3853	-33.0693	19.9937	70.2602	-42.3646	-47.0816	-17.6799
100.021	20.3125	-35.9545	38.2292	71.5387	-31.5915	16.9767	45.4924	-36.8087	-47.826	-29.6337
100.021	20.3542	-37.8944	29.2452	52.3238	-29.3424	23.4045	58.6555	-45.1989	-42.917	-27.1035
100.021	20.3958	-49.0994	21.3877	31.4377	-29.5649	22.757	57.1842	-48.4216	-43.3741	-19.6286
100.021	6.5625	-71.6564	-30.258	-10.5876	16.8011	-42.5784	-4.66617	-0.139008	-18.4845	-12.6712
100.021	6.60417	-77.3738	-34.6248	-10.8132	14.1755	-43.5971	-15.8907	6.12103	-16.4765	-19.1704
100.021	6.64583	-76.9041	-26.338	-9.85862	19.637	-51.7411	-11.2663	-3.81747	-18.5412	-13.3432
100.021	6.6875	-82.1106	-32.2674	-10.8222	14.1018	-55.9591	-25.6711	9.02069	-17.6722	-11.6553
100.021	6.72917	-84.5202	-30.2049	-8.22513	5.8949	-54.8028	-31.5814	6.09446	-14.6786	-18.472
100.021	6.77083	-83.9593	-24.6222	-4.91786	5.18416	-60.3074	-30.8056	12.1282	-18.4368	-15.289
100.021	6.8125	-84.7289	-33.6938	-4.30775	10.0001	-59.5085	-36.5345	18.5079	-13.4011	-17.0368
100.021	6.85417	-85.0105	-34.1163	-5.54798	3.62476	-60.7343	-27.6295	7.52137	-8.41618	-16.9299
100.021	6.89583	-85.8898	-39.6415	-1.06244	0.274085	-58.7569	-29.8681	30.2608	-17.3226	-24.3557
100.021	6.9375	-86.3603	-34.0592	-4.14764	6.57117	-63.3396	-29.4745	43.1258	-21.4324	-30.353
100.021	6.97917	-86.0534	-31.5828	-12.8879	6.4723	-61.5946	-19.006	50.6607	-27.9467	-34.9137
100.021	7.02083	-84.6485	-31.6263	3.53597	-6.89424	-62.9808	-16.8169	64.4541	-26.6578	-37.2905
100.021	7.0625	-84.7863	-28.1408	-5.86125	1.67219	-63.9492	-17.9089	47.8091	-21.0865	-35.9208
100.021	7.10417	-86.0247	-32.1256	-9.96507	12.6416	-67.2778	-20.097	53.8981	-25.7357	-32.0599
100.021	7.14583	-86.6877	-31.8093	-4.34175	20.7257	-66.8709	-32.1263	44.6873	-24.0783	-31.562
100.021	7.1875	-85.9176	-27.1164	-3.16778	5.00209	-63.8642	-36.2461	43.705	-24.4834	-23.9902
100.021	7.22917	-87.5464	-41.6878	5.73026	0.877091	-65.197	-29.1671	29.3023	-21.7774	-19.6927
100.021	7.27083	-87.82	-41.7838	-2.00651	-0.997731	-64.5514	-24.7326	12.8923	-3.80764	-25.5695
100.021	7.3125	-86.8838	-35.3159	-2.83161	-5.59948	-66.5836	-25.463	34.4205	-12.789	-24.292
100.021	7.35417	-87.0414	-37.9679	1.66637	-11.5605	-65.831	-33.765	54.8212	-15.3385	-21.6784
100.021	7.39583	-87.603	-34.0521	1.01617	-13.8507	-64.6189	-36.1498	41.9279	-11.8626	-23.5616
100.021	7.4375	-86.8455	-27.8721	-1.16733	-15.1178	-64.975	-30.8586	27.9407	-8.96907	-22.9204
100.021	7.47917	-86.3677	-22.5828	1.36199	-21.0962	-63.9323	-31.2847	23.4353	-14.9718	-15.3583
100.021	7.52083	-85.7396	-15.8254	4.50417	-18.6064	-63.8121	-39.9376	27.0807	-10.1184	-19.775
100.021	7.5625	-86.9455	-28.3885	12.8124	-14.6826	-65.225	-42.9884	30.5347	-12.0614	-16.776
100.021	7.60417	-87.8786	-32.2577	5.20252	-2.0297	-66.9188	-44.7643	32.8327	-15.419	-15.4344
100.021	7.64583	-85.5025	-23.2924	-5.20143	2.76437	-67.4493	-43.0388	37.4634	-10.7929	-14.6738
100.021	7.6875	-84.9989	-16.8157	-4.04771	-1.89682	-66.7672	-39.1985	26.2105	-11.7807	-14.8466
100.021	7.72917	-87.2745	-13.9392	0.520261	-6.86052	-66.0458	-40.4854	33.2483	-20.2464	-26.4551
100.021	7.77083	-86.3782	-7.79898	-0.949107	-20.5011	-64.167	-38.74	35.1451	-26.1219	-14.3939
100.021	7.8125	-88.2435	-17.4234	-3.7703	-30.8929	-62.7903	-33.4208	16.69	-16.3918	-11.4248
100.021	7.85417	-88.8179	-22.2157	-2.16031	-21.7708	-63.4782	-34.8883	18.4888	-19.7495	-16.9367
100.021	7.89583	-88.1882	-24.7925	-6.08725	-17.8696	-62.3117	-34.1821	12.8035	-15.2564	-14.1295
100.021	7.9375	-87.0834	-17.8762	-15.5121	-6.05701	-63.9434	-29.1464	-0.438117	-10.5186	-12.9345
100.021	7.97917	-87.7456	-22.7107	-16.9057	-6.68298	-62.3519	-25.7685	-3.56441	-14.1708	-11.6028
100.021	8.02083	-86.7866	-22.3975	-7.92838	-10.1295	-61.3499	-28.1863	-2.69684	-17.6003	-7.53317
100.021	8.0625	-82.6325	-18.7361	3.93686	-12.2244	-60.4831	-29.0255	-10.6346	-1.59369	-5.02304
100.021	8.10417	-77.2255	-8.05204	11.862	-14.5244	-58.4539	-29.1298	-9.34296	3.7142	-6.4274
100.021	8.14583	-80.2119	-7.15786	14.7759	-12.8372	-62.2714	-24.1939	-9.67177	-4.25213	-13.8712
100.021	8.1875	-80.6139	-6.08485	16.7678	-15.0196	-62.4948	-31.0994	-4.09882	-4.43686	-12.1614
100.021	8.22917	-81.8703	2.54902	12.0409	-19.9933	-57.6037	-37.8154	2.65195	-13.1482	-16.0927
100.021	8.27083	-82.1406	-4.75902	11.4183	-22.1535	-52.3621	-47.299	15.8119	-33.8289	12.3708
100.021	8.3125	-82.4037	-0.785712	-0.850367	-26.3674	-44.659	-48.2944	6.52032	-30.477	14.6411
100.021	8.35417	-79.9307	16.8854	-11.4853	-21.2337	-47.0466	-51.4831	22.1339	-35.0609	20.8612
100.021	8.39583	-78.3956	18.0557	-4.2559	-13.9317	-54.3767	-40.6752	1.33193	-26.4499	10.0898
100.021	8.4375	-75.4935	14.4427	4.05683	-18.9832	-54.2584	-36.3128	-14.0956	-9.51861	12.1786
100.021	8.47917	-74.6584	14.1788	1.57584	-9.26507	-57.2532	-38.699	-20.2117	3.73457	11.0324
100.021	8.52083	-73.3807	15.092	21.6013	-18.8327	-57.8108	-41.8309	-11.4605	-7.47547	16.5587
100.021	9.4375	-50.5428	0.797494	-13.0369	5.24556	-21.9976	-20.0065	1.93401	-13.2395	-2.8512
100.021	9.47917	-45.5567	0.947936	-9.32895	-0.495888	-18.652	0.00173449	-11.9104	-19.4587	3.57139
100.021	9.52083	-42.5593	-15.4979	5.56376	-0.97388	-10.2339	-3.12397	-19.752	-13.5742	7.81567
100.021	9.5625	-42.5394	-12.1465	18.0893	-3.11452	-13.7583	-8.83457	-14.7404	-3.76384	-11.384
100.021	9.72917	-17.5029	8.5214	-0.415271	-5.07315	-10.505	-18.6559	18.1407	-11.8995	6.13012
100.021	9.77083	-16.5554	1.47268	6.43726	-5.41326	-1.09178	-18.5832	-1.41129	-0.188391	3.07903
100.062	13.0208	-91.6201	-11.3202	12.0649	17.6762	-13.4679	-62.592	-74.948	-27.0166	21.0737
100.062	13.0625	-91.6011	-15.6457	11.919	27.3829	-4.63883	-66.6072	-75.7703	-25.4071	21.3471
100.062	13.1042	-91.622	-24.4904	13.7976	37.9799	0.486429	-66.6454	-78.3462	-20.006	21.7127
100.062	13.1458	-92.3728	-31.1228	4.24223	62.2123	6.93174	-71.0938	-78.6198	-15.5017	17.2739
100.062	13.4375	-93.9356	-32.2895	-11.5685	79.9996	-1.31736	-79.2673	-80.1878	13.35	22.463
100.062	13.4792	-94.2287	-40.6416	-12.5062	78.8021	-2.21068	-80.4667	-75.9733	9.90225	23.217
100.062	13.5208	-94.0478	-42.3064	-12.3255	80.1928	-6.88172	-80.9369	-74.1229	17.6611	20.8255
100.062	13.5625	-93.484	-41.6876	-12.4948	81.4368	-16.108	-81.2342	-71.7511	27.6012	24.0273
100.062	13.6042	-92.8941	-43.2511	-11.5857	97.0192	-24.4263	-80.0807	-73.3482	50.3878	19.1372
100.062	13.6458	-93.0921	-45.7811	-4.69724	77.792	-18.0007	-81.6016	-71.6332	51.8247	15.7272
100.062	13.6875	-93.0658	-44.3999	1.16349	80.972	-23.9831	-80.141	-73.8583	48.808	16.0002
100.062	13.7292	-93.5787	-46.8658	10.2217	70.6998	-18.7097	-81.8638	-71.4703	52.3146	0.259259
100.062	13.7708	-94.17	-44.0118	4.42356	75.9016	-20.8321	-82.2321	-67.4912	25.2524	-1.02435
100.062	13.8125	-95.1171	-47.985	2.28812	83.3282	-18.0507	-82.6743	-67.2527	23.8157	-13.0419
100.062	13.8542	-94.5257	-47.889	5.37127	93.8884	-11.3523	-83.1427	-68.04	22.2177	-11.9088
100.062	13.8958	-94.7077	-44.4384	-0.557527	110.048	-8.16913	-82.44	-66.0759	15.5403	-27.8521
100.062	13.9375	-95.4626	-42.2879	7.38624	97.6068	-7.19923	-83.534	-61.5497	0.266433	-37.1078
100.062	13.9792	-95.5853	-39.8295	6.23431	102.208	-16.5253	-79.5084	-61.4824	-8.17748	-43.5439
100.062	14.0208	-96.0122	-44.2033	5.25779	96.2729	-19.8344	-71.8962	-60.8848	-31.5145	-42.6792
100.062	14.0625	-96.135	-40.3075	9.30263	93.4512	-21.436	-68.6244	-62.1001	-32.6567	-51.328
100.062	14.1042	-96.0563	-38.7079	20.2449	77.7103	-15.5274	-65.8249	-61.4855	-44.9176	-50.8348
100.062	14.1458	-96.3942	-30.0575	8.62905	74.341	-17.8607	-61.1802	-59.9982	-50.9586	-56.4818
100.062	14.1875	-96.5247	-28.3321	13.3793	51.6924	-17.5875	-57.8643	-56.9659	-57.4007	-55.7097
100.062	14.2292	-96.7108	-33.0035	15.6277	42.6518	-7.88366	-52.3615	-54.0826	-62.1961	-60.926
100.062	14.2708	-96.6639	-33.6498	18.6354	30.7498	-5.14212	-44.9588	-48.2016	-69.2908	-60.9707
100.062	14.3125	-96.7362	-34.6785	10.2008	38.6727	-4.55784	-42.0676	-43.1675	-73.3459	-60.964
100.062	14.3542	-96.6472	-33.2897	1.699	41.2371	0.456073	-42.8996	-33.0534	-73.6487	-65.422
100.062	14.3958	-96.2913	-29.8722	4.69101	32.9399	-6.13021	-31.1652	-27.5086	-77.7455	-63.5474
100.062	14.4375	-96.3113	-23.9317	-2.34177	43.0231	-15.484	-24.6047	-24.9194	-76.8368	-68.6711
100.062	14.4792	-96.4288	-18.8716	1.92602	38.8012	-12.2963	-25.5641	-25.718	-77.1502	-71.9199
100.062	14.5208	-96.1487	-21.0692	4.50087	35.1968	-10.6883	-20.3851	-30.9107	-77.7003	-68.4747
100.062	14.5625	-96.6883	-18.3491	-4.75975	37.219	-5.93543	-20.4142	-28.5532	-78.9404	-72.4474
100.062	14.6042	-96.8295	-15.907	-10.7299	39.5256	-0.807738	-17.9305	-29.5297	-80.208	-73.3401
100.062	14.6458	-97.3137	-13.7976	-6.61651	45.9563	-9.02609	-21.7343	-34.2208	-81.0289	-74.268
100.062	14.6875	-97.435	-12.6505	-12.0653	50.1409	-9.05329	-26.2987	-36.4605	-81.8982	-71.151
100.062	14.7292	-97.7891	-23.6564	-6.69467	50.1603	-8.3985	-31.7607	-41.1095	-82.8156	-67.3251
100.062	14.7708	-97.924	-18.9273	-16.6499	49.3801	0.502418	-38.2638	-44.5088	-81.5172	-67.6814
100.062	14.8125	-98.1907	-29.4591	-14.2882	50.895	3.53677	-44.0615	-44.0538	-81.0587	-67.6873
100.062	14.8542	-98.1184	-22.2326	-17.266	50.1843	6.45639	-45.3197	-46.182	-81.3627	-66.6493
100.062	14.8958	-98.0865	-20.9198	-16.9193	69.6729	-11.8315	-47.172	-46.9397	-79.1707	-66.6553
100.062	14.9375	-97.8788	-15.6228	-6.4861	51.8315	-12.4512	-48.2591	-53.337	-77.3879	-62.9566
100.062	14.9792	-97.6979	-13.5729	-8.56777	56.8526	-11.2018	-49.6363	-54.1697	-77.4948	-59.7357
100.062	15.0208	-97.5593	-6.91826	-24.6225	90.955	-4.29804	-58.3416	-55.7737	-76.0444	-56.8722
100.062	15.0625	-96.9347	-13.6918	-10.683	93.5024	-11.6938	-61.635	-47.5641	-74.4393	-54.7439
100.062	15.1042	-96.6235	-17.8396	-13.7577	136.23	-22.79	-63.5513	-40.569	-74.108	-53.4184
100.062	15.1458	-94.7794	-12.8805	-14.2825	139.701	-24.2335	-58.5003	-37.5258	-67.678	-54.0652
100.062	15.1875	-90.4042	-14.5516	-1.55858	154.01	-17.0259	-59.5585	-31.5325	-59.7494	-51.4354
100.062	15.2292	-82.0324	-17.5729	-2.17447	156.032	-13.639	-58.3259	-14.3161	-51.2049	-42.1619
100.062	15.2708	-57.3077	-17.615	13.6097	129.636	-5.48367	-56.077	9.76638	-37.4313	-30.334
100.062	15.3125	-15.4442	-22.2138	12.6148	168.05	-12.2703	-44.122	26.9417	-22.671	-25.1668
100.062	15.3542	46.8632	-23.0692	16.4429	181.5	-7.67792	-40.1157	31.2722	-5.62149	-14.973
100.062	15.3958	118.506	-19.8234	18.707	187.813	-1.51058	-41.4226	43.4294	4.51529	-7.76599
100.062	15.4375	173.797	-17.8045	20.2136	175.774	-0.565155	-33.6209	52.4587	0.762458	-0.904853
100.062	15.4792	185.481	-27.1715	32.7504	175.035	0.219188	-34.1304	44.9654	12.5479	-0.318508
100.062	15.5208	168.218	-21.8498	8.13422	222.615	-3.11792	-28.8313	32.4191	11.4137	-3.28598
100.062	15.5625	150.076	-22.5529	2.84519	218.821	5.16267	-30.5017	26.2045	13.3661	-5.82375
100.062	15.6042	93.6485	-30.5749	4.36217	198.884	4.92229	-34.1826	37.2428	-1.49648	-4.21419
100.062	15.6458	44.7614	-31.3436	-10.7487	175.235	-2.465	-28.5008	45.8426	-8.73981	-7.52462
100.062	15.6875	20.6455	-35.5805	-9.15404	160.684	-9.85982	-24.267	34.2644	0.280072	-13.9611
100.062	15.7292	-18.2779	-40.2225	-16.8084	120.565	2.08313	-32.32	30.6186	-3.54504	-14.4065
100.062	15.7708	-45.6812	-38.3345	-22.0787	72.5757	2.72028	-24.8518	15.9728	-12.5334	-16.3436
100.062	15.8125	-61.4727	-35.36	-26.8385	62.5859	-3.48176	-25.5276	2.45518	-19.5766	-15.398
100.062	15.8542	-73.6288	-34.1359	-23.9549	36.9637	-8.70355	-21.3297	-7.61189	-25.848	-21.8731
100.062	15.8958	-74.6421	-33.6274	-26.3164	30.9904	-0.682306	-10.2192	-18.0738	-24.105	-28.605
100.062	15.9375	-71.1695	-34.5098	-24.0597	22.2702	-9.95659	16.4007	-18.736	-29.2793	-21.2898
100.062	15.9792	-77.2079	-33.9564	-30.6483	6.83659	-3.58916	19.7881	-26.8195	-30.894	-20.2511
100.062	16.0208	-81.1297	-37.0624	-31.2857	-12.7552	11.8369	24.5611	-30.7263	-31.1422	-24.7352
100.062	16.0625	-79.0568	-38.9367	-23.6449	-21.7517	7.74624	66.1501	-34.449	-38.2835	-20.7378
100.062	16.1042	-78.1589	-41.685	-22.6222	-22.7171	8.45377	85.8864	-35.7397	-39.5541	-20.0179
100.062	16.1458	-68.3607	-40.2403	-17.0545	-12.4655	11.1947	109.984	-32.6141	-42.1469	-19.8912
100.062	16.1875	-27.0381	-36.2011	11.0114	-6.48426	34.9846	138.137	-32.1738	-36.4717	-20.4659
100.062	16.2292	112.918	-25.2322	50.9117	14.066	55.9457	194.941	-37.9577	-41.849	-0.30692
100.062	16.2708	427.257	-15.4518	99.2951	30.2128	90.5305	237.577	-41.4018	-34.3802	-2.83479
100.062	16.3125	430.176	-14.7263	101.31	27.7777	100.256	261.595	-42.7611	-36.5359	-8.11212
100.062	16.3542	202.316	-28.0523	91.7048	-11.1566	100.614	252.275	-51.7347	-26.4156	-1.70705
100.062	16.3958	25.541	-35.9694	54.6344	-28.594	82.4366	192.918	-50.4866	-23.4844	-12.2946
100.062	16.4375	-39.42	-43.1842	27.4266	-42.3424	54.5487	193.99	-53.8613	-27.3471	-4.71461
100.062	16.4792	-66.1944	-41.8717	9.1156	-48.0223	28.4855	189.381	-53.2007	-37.0706	-6.35599
100.062	16.5208	-76.7179	-38.8392	3.37326	-51.9052	12.3738	201.058	-55.8753	-44.8608	-6.97804
100.062	16.5625	-84.5851	-32.479	-5.06353	-54.3947	22.2929	140.963	-57.4916	-50.6101	-14.771
100.062	16.6042	-89.3854	-31.6384	-0.49863	-58.2788	18.7339	136.111	-58.1225	-56.1295	-27.3786
100.062	16.6458	-91.1194	-29.7517	-3.4003	-51.856	8.14191	110.056	-61.5918	-61.5604	-18.9494
100.062	16.6875	-90.7234	-21.6573	-7.10211	-41.85	4.68393	103.215	-64.9287	-60.3665	-25.8715
100.062	16.7292	-88.5966	-11.1733	11.384	-40.7131	13.0882	77.7564	-58.9232	-65.1479	-32.4476
100.062	16.7708	-89.6743	-10.7488	16.3029	-40.3539	15.7928	74.8658	-62.3479	-68.629	-30.2685
100.062	16.8125	-93.3118	-8.29843	10.8399	-41.6056	8.75421	57.1376	-69.2543	-67.8659	-33.2597
100.062	16.8542	-95.9644	-7.4258	7.01528	-44.5429	-2.27688	45.0629	-70.7034	-71.5046	-37.9311
100.062	16.8958	-97.5137	-12.9176	4.9645	-44.639	1.13907	25.5977	-71.4944	-74.5058	-46.7765
100.062	16.9375	-98.336	-11.451	2.30183	-43.0794	-14.6792	33.2423	-75.4457	-76.0783	-51.6711
100.062	16.9792	-98.7893	-10.2659	0.0494334	-43.8984	-10.8624	16.8004	-75.3936	-79.1468	-55.0056
100.062	17.0208	-98.7173	-3.42798	12.7824	-41.563	-6.89553	6.6286	-71.6642	-83.2563	-57.2141
100.062	17.0625	-98.6916	-1.24586	23.031	-35.5233	-8.12058	2.85347	-74.4188	-83.3403	-58.5308
100.062	17.1042	-98.4909	7.83613	31.375	-35.8914	-13.097	8.0399	-76.5956	-83.6003	-53.8913
100.062	17.1458	-98.1389	22.4996	42.8526	-32.7275	-20.2566	11.4459	-77.4449	-83.1311	-53.2453
100.062	17.1875	-98.0859	29.0867	59.0816	-36.0377	-10.6105	9.42806	-77.3535	-84.3282	-58.024
100.062	17.2292	-97.6939	45.6086	81.1332	-35.8695	-13.1934	13.8486	-78.2199	-86.4502	-53.2535
100.062	17.2708	-97.1486	55.0553	112.74	-31.7209	-4.84929	2.82173	-76.9732	-86.5256	-58.2946
100.062	17.3125	-96.0995	75.0933	137.128	-31.3764	2.979	8.65582	-79.9099	-86.8189	-53.7981
100.062	17.3542	-95.3888	90.5766	127.643	-15.5378	0.455118	12.5532	-78.6294	-88.1562	-56.0266
100.062	17.3958	-94.4105	103.905	152.242	-15.2853	-3.73733	19.1211	-80.4575	-87.145	-55.4683
100.062	17.4375	-94.7722	88.9557	163.406	-12.2221	-3.06306	20.6406	-80.0316	-86.7597	-61.2986
100.062	17.4792	-94.6804	71.0886	166.007	-12.303	2.89191	15.3833	-76.8643	-86.9471	-62.8236
100.062	17.5208	-92.5159	81.6727	155.9	-17.0604	9.99404	9.21816	-75.4266	-86.2337	-52.2394
100.062	17.5625	-90.2161	92.7452	138.042	-13.4074	13.9655	8.00606	-73.3029	-84.2107	-52.5379
100.062	17.6042	-88.8297	104.448	152.579	-23.9766	20.2239	7.09206	-70.4975	-83.7549	-53.8887
100.062	17.6458	-86.2007	120.004	153.026	-17.637	9.21076	20.262	-70.9587	-82.1065	-55.9015
100.062	17.6875	-83.4887	111.644	145.222	-10.2021	3.37754	22.2265	-71.6559	-79.5014	-51.7418
100.062	17.7292	-79.1696	123.293	147.248	-9.3114	2.19078	31.9668	-72.9759	-78.7074	-46.3857
100.062	17.7708	-77.7613	103.303	135.54	-13.043	-4.30661	41.0533	-68.7106	-74.429	-50.5477
100.062	17.8125	-72.0152	86.4888	133.282	-20.9014	-5.48911	41.279	-63.9662	-68.972	-45.5251
100.062	17.8542	-68.7276	64.2337	134.173	-18.451	-3.46351	53.7311	-64.0278	-66.0532	-44.9794
100.062	17.8958	-59.4999	68.7243	117.634	-23.2044	7.34215	44.3769	-58.0423	-64.6597	-37.5021
100.062	17.9375	-57.3987	41.9406	120.997	-30.2324	12.307	60.7512	-51.1939	-68.8985	-28.967
100.062	17.9792	-37.2648	51.8342	125.823	-26.9844	3.78654	58.9893	-48.2664	-58.7859	-28.7753
100.062	18.0208	-32.8368	31.983	110.64	-24.3617	11.8567	36.6398	-42.6955	-52.4261	-23.3461
100.062	18.0625	-17.0578	58.7754	100.848	-22.9894	-3.96015	53.7656	-41.5305	-48.3028	-24.34
100.062	18.1042	-1.38512	61.8147	110.838	-25.1789	-8.46425	61.1825	-37.8624	-47.3881	-19.905
100.062	18.1458	4.70365	62.9651	112.325	-30.4944	-2.73236	64.9537	-42.7497	-45.2018	-13.5087
100.062	18.1875	18.3934	59.3875	83.8499	-34.6634	0.40884	68.62	-40.3253	-43.381	8.09854
100.062	18.2292	24.7906	57.8954	90.2404	-37.908	7.32328	64.5896	-40.3375	-38.2506	2.81183
100.062	18.2708	37.7721	51.9833	93.7815	-34.7249	3.39067	60.5187	-40.608	-33.2956	8.99724
100.062	18.3125	57.644	39.1016	94.7157	-37.5455	8.97533	72.4565	-43.2384	-17.4312	5.80401
100.062	18.3542	62.9129	27.2502	94.864	-33.8545	7.877	64.6604	-39.9775	-14.0778	8.42451
100.062	18.3958	80.8696	25.2163	89.3963	-36.8979	3.17798	85.6493	-41.3227	-13.0125	23.6181
100.062	18.4375	136.092	46.3412	97.2949	-38.7495	3.58147	85.287	-45.0103	-9.82018	40.2721
100.062	18.4792	138.328	39.379	88.5484	-34.0668	0.455325	103.988	-53.0218	-0.197666	43.1655
100.062	18.5208	133.524	41.1723	85.8738	-37.7719	7.50216	92.5795	-50.8453	2.044	37.7203
100.062	18.5625	113.745	29.6561	78.3123	-39.6267	11.1902	94.5324	-54.5028	17.3836	32.5643
100.062	18.6042	120.48	35.9559	79.6638	-40.9488	13.547	82.4262	-52.8032	18.6961	31.7254
100.062	18.6458	116.527	38.5365	72.842	-52.5533	33.0381	105.459	-57.4515	7.71556	52.1348
100.062	18.6875	87.7892	33.8763	61.5887	-52.3017	43.5779	77.123	-55.4818	3.83973	54.8063
100.062	18.7292	65.5166	51.4272	66.7378	-55.441	40.3046	78.9596	-57.6013	3.96054	32.9292
100.062	18.7708	60.7774	39.7872	75.9003	-51.4418	23.9585	95.9804	-62.2353	-6.36727	56.7569
100.062	18.8125	55.259	37.9886	71.6676	-55.9202	23.8685	91.7457	-61.0213	-7.56018	73.7451
100.062	18.8542	26.6244	26.8263	77.9547	-57.7322	13.5201	113.002	-63.0525	0.0644813	48.4796
100.062	18.8958	20.7304	43.3341	46.8742	-57.8072	21.3778	115.338	-64.1959	-9.40416	60.3176
100.062	18.9375	14.5546	27.0528	53.7495	-60.2079	42.6343	105.02	-62.5077	-7.09899	44.6889
100.062	18.9792	6.60619	38.2107	59.1131	-60.7628	30.1153	121.257	-62.383	-9.44037	25.9774
100.062	19.0208	6.63543	45.2082	54.6476	-62.0404	33.3309	133.884	-62.3724	-14.405	24.5544
100.062	19.0625	8.70505	49.5085	46.8994	-61.989	35.5543	145.947	-57.5636	-24.7267	22.2701
100.062	19.1042	4.22948	41.4403	37.1012	-60.5567	34.423	161.111	-57.1691	-28.5966	26.9486
100.062	19.1458	1.76309	31.8168	36.9306	-59.7548	39.7749	152.822	-54.5218	-24.9671	16.173
100.062	19.1875	5.29011	29.027	55.1193	-60.9496	27.9351	169.351	-47.459	-29.8412	6.05388
100.062	19.2292	24.7489	45.0982	68.2235	-63.8002	27.7879	175.488	-45.7122	-25.9834	-0.193508
100.062	19.2708	54.5117	65.3955	73.2931	-62.5478	22.5026	176.198	-41.0321	-25.0813	-3.70403
100.062	19.3125	44.8671	50.7591	73.1846	-57.1724	20.5142	179.57	-36.8378	-34.5982	-6.91531
100.062	19.3542	53.9593	61.0862	67.8402	-57.0697	24.0932	179.116	-30.3221	-35.4662	-14.8326
100.062	19.3958	64.6649	68.6399	58.5301	-51.1381	17.9263	186.511	-31.0502	-34.5255	-17.3579
100.062	19.4375	77.9582	66.7908	63.1999	-47.5523	18.8063	176.916	-34.919	-30.3988	-16.3546
100.062	19.4792	81.6597	56.2357	63.6238	-45.5021	17.9584	162.457	-34.1413	-28.1553	-10.9862
100.062	19.5208	79.5436	41.7143	62.8375	-46.274	25.193	172.159	-33.118	-25.8032	-14.3512
100.062	19.5625	68.8658	40.1208	66.4076	-52.1043	40.4887	153.465	-31.6142	-28.5925	-13.0439
100.062	19.6042	68.4628	26.7856	70.0927	-46.0309	38.9601	152.444	-39.3529	-20.9581	-13.9241
100.062	19.6458	56.1344	35.6808	50.313	-37.8224	29.7604	154.095	-36.1191	-24.2186	-22.8603
100.062	19.6875	40.9047	40.1896	55.8627	-44.2055	42.1526	141.028	-31.8116	-34.8089	-24.1151
100.062	19.7292	24.3647	37.4197	55.3059	-39.5744	29.7553	139.317	-29.1901	-39.6859	-27.2844
100.062	19.7708	19.4959	28.5028	74.8825	-39.9261	36.5662	139.508	-34.8466	-42.3468	-27.9583
100.062	19.8125	9.03416	25.0564	73.3841	-32.9629	35.3226	121.507	-30.5658	-50.5631	-27.0964
100.062	19.8542	5.9069	36.4751	62.9238	-42.9638	65.9423	100.093	-27.717	-52.3516	-26.9767
100.062	19.8958	15.0112	28.195	72.9468	-35.9141	53.4012	118.502	-36.9461	-53.86	-16.9919
100.062	19.9375	21.3651	26.9044	72.8495	-29.2471	41.6706	116.385	-37.4084	-51.4561	-16.0448
100.062	19.9792	39.1352	46.0465	73.2515	-30.1154	41.0619	120.423	-37.5328	-44.1529	-27.4616
100.062	20.0208	40.2341	36.0988	68.4785	-22.8775	38.2741	119.639	-32.529	-49.0162	-24.0944
100.062	20.0625	42.204	45.0121	61.1632	-27.257	44.6632	116.755	-36.7184	-45.4124	-22.7762
100.062	20.1042	17.7724	50.9089	58.7516	-33.9183	48.2904	94.1905	-36.4826	-47.3066	-22.8139
100.062	20.1458	11.7262	50.8612	66.9175	-34.8666	33.4227	104.003	-42.8033	-46.0142	-18.9497
100.062	20.1875	-2.79936	47.1345	62.1134	-32.0169	20.4232	90.3702	-40.0593	-47.7081	-16.5802
100.062	20.2292	-15.3723	44.0932	53.2347	-32.8375	20.6873	72.6445	-42.8136	-41.231	-18.5052
100.062	20.2708	-30.1068	35.3583	64.6027	-36.232	22.2841	52.4281	-45.8012	-48.3731	-5.67878
100.062	20.3125	-43.7426	26.184	81.4941	-41.2783	20.3817	43.5348	-42.9461	-44.4065	-23.6714
100.062	20.3542	-50.8676	27.1116	40.1764	-26.3238	21.5647	48.3703	-50.6471	-46.1459	-21.928
100.062	6.52083	-72.8668	-36.1993	-2.91922	7.52756	-40.8737	-3.60763	6.56794	-15.7545	-20.3793
100.062	6.5625	-75.2649	-29.7267	0.427825	-0.825194	-43.5344	-7.574	1.00665	-15.134	-21.0038
100.062	6.60417	-77.1905	-30.7869	-11.0181	8.98866	-43.0481	-14.8809	5.08288	-14.3893	-22.0801
100.062	6.64583	-78.4331	-30.6081	-5.22775	12.6302	-44.4032	-25.2183	-4.57088	-7.32799	-20.8103
100.062	6.6875	-81.6732	-39.3211	3.57895	3.30843	-45.0833	-31.8168	0.240924	-7.66945	-18.5543
100.062	6.72917	-81.7831	-35.5201	-5.45743	6.59845	-52.3151	-24.3261	0.299827	-10.3367	-13.6167
100.062	6.77083	-81.4092	-36.3904	-8.56041	18.1176	-52.284	-32.1819	10.6087	-10.056	-15.9467
100.062	6.8125	-83.2086	-34.5401	-14.3766	28.1332	-57.1094	-29.749	16.3821	-14.1076	-22.3749
100.062	6.85417	-83.3245	-36.5432	-12.7294	14.3326	-56.6978	-29.2673	31.6983	-14.9794	-23.206
100.062	6.89583	-84.2222	-38.1914	-13.8008	14.1467	-55.9335	-32.1363	39.7598	-17.7017	-24.5758
100.062	6.9375	-83.8902	-38.5636	-2.16787	1.35094	-62.4722	-17.7787	38.042	-15.185	-26.7959
100.062	6.97917	-83.5413	-37.8154	-1.35002	-1.9996	-58.1886	-17.3967	48.8071	-24.2558	-29.673
100.062	7.02083	-84.9139	-41.4216	3.31592	-2.4457	-62.7274	-16.4087	62.681	-27.0197	-30.9231
100.062	7.0625	-84.3669	-32.7037	-8.6899	6.07951	-63.8674	-15.7455	52.3064	-20.1252	-35.2434
100.062	7.10417	-86.4726	-30.0742	-15.1287	18.9801	-63.755	-24.3339	46.2305	-28.2521	-33.4197
100.062	7.14583	-85.1871	-28.748	-12.7771	16.8371	-63.3035	-27.1363	47.4228	-23.6869	-32.1841
100.062	7.1875	-85.8309	-31.6286	-8.00666	21.9703	-62.334	-39.0464	45.0421	-27.0305	-23.9898
100.062	7.22917	-86.4575	-23.7682	-12.2189	15.6286	-62.7002	-39.2154	41.8187	-24.488	-27.9148
100.062	7.27083	-86.5958	-32.5091	-14.4649	17.168	-65.4743	-33.0896	40.3732	-20.762	-22.8762
100.062	7.3125	-87.0924	-35.298	-12.5569	12.9078	-68.4124	-28.0615	31.8644	-13.1986	-22.3137
100.062	7.35417	-85.1098	-29.9185	3.65172	-12.5626	-64.7667	-40.2931	62.0917	-21.4081	-12.5201
100.062	7.39583	-84.6921	-29.9715	0.674446	-5.44082	-65.9161	-39.3165	45.9385	-7.73946	-17.5461
100.062	7.4375	-85.7695	-29.4295	-1.41083	-7.87805	-66.1848	-34.842	24.3915	-4.02275	-15.5955
100.062	7.47917	-86.9026	-24.3275	0.17872	-18.3146	-64.6884	-38.9095	30.502	-13.6535	-12.9891
100.062	7.52083	-84.1958	-13.8336	-4.10021	-21.9183	-61.447	-45.1878	34.7098	-14.4892	0.626854
100.062	7.5625	-84.8197	-20.3346	3.1987	-13.4718	-65.9462	-40.888	33.275	-9.44683	-12.1613
100.062	7.60417	-86.9048	-30.6379	-3.1601	-0.920697	-66.3921	-40.0429	22.8748	-11.4805	-10.2223
100.062	7.64583	-86.1666	-17.2548	-9.41434	-7.7864	-65.1477	-38.2243	24.3541	-8.21907	-18.5537
100.062	7.6875	-83.9148	-16.9097	-7.84864	-2.99132	-62.498	-40.9653	14.5301	-6.04528	-9.09993
100.062	7.72917	-85.8895	-10.4012	-9.70421	-8.82561	-61.8548	-41.1818	28.3265	-15.9886	-20.9148
100.062	7.77083	-86.2078	-19.2618	1.16302	-18.4128	-61.2754	-42.3216	33.9288	-15.615	-18.0082
100.062	7.8125	-87.4131	-24.057	-0.774318	-18.7716	-64.809	-33.9569	17.0054	-9.56185	-16.3853
100.062	7.85417	-86.7577	-15.4246	-5.28019	-17.6734	-63.1706	-26.7193	9.23854	-13.2169	-21.5227
100.062	7.89583	-86.1143	-19.2447	1.08841	-28.1413	-58.1667	-26.519	0.546186	-13.0638	-11.9046
100.062	7.9375	-84.34	-19.9577	-7.39237	-19.8727	-58.2231	-29.4378	-1.48051	-4.12288	-5.31092
100.062	7.97917	-84.2497	-24.4233	-3.2671	-10.6191	-56.8624	-30.239	-8.64806	-7.65593	-5.05175
100.062	8.02083	-81.4104	-20.7071	8.01345	-14.4015	-56.2244	-30.0055	-10.5574	-5.57047	-2.01865
100.062	8.0625	-79.8237	-12.976	9.21566	-16.8695	-56.2473	-33.1408	-9.23134	2.47172	-6.14644
100.062	8.10417	-76.0623	-4.28286	14.2718	-12.0452	-58.1941	-30.2584	-13.744	3.44683	-4.35619
100.062	8.14583	-73.0254	1.75339	23.5676	-19.6237	-58.0108	-35.0649	6.39622	-1.57156	-6.52212
100.062	8.1875	-74.6602	8.08337	22.3609	-26.0078	-60.0354	-28.0972	-5.99961	-12.0013	8.94033
100.062	8.22917	-72.8063	9.89747	26.4972	-27.12	-53.8828	-38.4779	-8.39743	-14.0899	20.2114
100.062	8.27083	-77.2869	16.3715	8.95274	-29.1912	-47.4765	-42.3857	2.3882	-21.7066	4.29084
100.062	8.3125	-80.8879	3.44435	4.03865	-32.2489	-39.438	-50.3404	11.8835	-26.593	6.11682
100.062	8.35417	-79.4809	8.4838	0.627524	-20.7311	-47.4695	-50.9339	11.4049	-26.6388	12.5664
100.062	8.39583	-74.5419	18.1088	1.5093	-8.3516	-52.3314	-39.9253	-11.4037	-9.8203	1.26625
100.062	8.4375	-74.576	13.4748	5.84036	-5.59568	-55.0779	-40.621	-9.38976	-0.52645	-6.73383
100.062	9.47917	-41.1215	1.37471	-3.33027	-3.12688	-11.9407	-16.1357	-10.0607	-8.23732	1.7573
100.062	9.5625	-29.0802	-13.5749	11.256	-13.2966	-8.14703	-10.051	-1.31802	-10.3086	16.3295
100.062	9.6875	-22.1885	-3.03434	7.58387	-14.1798	-13.4855	-8.79017	5.74352	1.84789	2.27101
100.062	9.72917	-17.4922	5.18575	10.1159	-10.4862	-10.5437	-16.2642	26.1464	-10.7495	-5.63927
100.104	13.4375	-94.0245	-32.7275	-16.154	92.519	-1.37384	-80.3455	-78.0831	6.36279	21.7751
100.104	13.4792	-94.8691	-36.2803	-15.2176	90.0394	-4.83836	-81.4976	-78.8273	19.8739	11.835
100.104	13.5208	-95.0802	-43.4524	-17.2709	96.1335	-7.64755	-81.9318	-75.3388	11.5081	16.853
100.104	13.5625	-94.2657	-44.6894	-13.4224	86.4227	-4.0157	-82.8698	-74.1253	37.0489	10.1674
100.104	13.6042	-93.8621	-48.5859	-15.128	110.676	-11.4909	-83.0063	-73.827	37.6539	23.2089
100.104	13.6458	-94.7575	-51.8502	-5.44985	92.2146	-21.7733	-83.6618	-70.8546	40.5147	14.457
100.104	13.6875	-94.3925	-51.4696	1.59325	78.757	-18.7069	-82.9383	-71.4362	47.0108	9.24109
100.104	13.7292	-94.6959	-48.5893	0.0599303	89.0215	-20.2715	-83.2409	-70.8658	45.4334	-3.64978
100.104	13.7708	-95.0732	-49.3819	2.02526	97.3133	-16.9622	-85.6112	-66.515	29.6379	-6.78046
100.104	13.8125	-95.3824	-51.1512	0.339097	111.41	-18.8701	-85.9219	-68.5211	29.9326	-4.60892
100.104	13.8542	-95.5222	-51.1192	-0.293107	131.031	-11.6871	-86.3574	-67.5613	25.4468	-18.8886
100.104	13.8958	-96.0043	-47.6732	0.0257975	120.046	-11.3982	-86.2358	-63.1414	18.829	-35.0485
100.104	13.9375	-95.4726	-42.564	1.65255	106.132	-8.86755	-84.2826	-63.7174	26.2359	-42.659
100.104	13.9792	-95.786	-41.8669	2.94903	111.817	-14.1613	-80.7103	-63.3963	-0.158876	-45.0652
100.104	14.0208	-95.6356	-37.3001	1.43148	93.2744	-11.0356	-77.2254	-61.4777	-22.0537	-41.6374
100.104	14.0625	-95.46	-38.8582	13.1061	74.612	-8.88396	-74.9842	-62.3582	-24.6115	-41.8741
100.104	14.1042	-95.898	-37.6378	12.6854	79.1227	-14.8601	-71.1439	-60.9153	-39.1721	-44.208
100.104	14.1458	-96.7093	-31.2519	0.603652	86.271	-18.8836	-66.102	-61.8047	-47.7466	-53.4563
100.104	14.1875	-96.8328	-26.4317	4.02722	71.6469	-14.5201	-65.4407	-54.8662	-59.2107	-55.6678
100.104	14.2292	-96.6758	-29.7554	6.53799	52.9979	-5.90421	-58.8348	-54.617	-63.6858	-54.5201
100.104	14.2708	-96.8471	-32.6748	4.44307	57.3481	-10.5951	-52.2926	-49.2009	-68.9976	-57.5781
100.104	14.3125	-96.9483	-32.2484	6.15241	43.6888	-10.2634	-48.6778	-42.8274	-69.0861	-63.7208
100.104	14.3542	-96.9865	-30.888	-3.71554	38.1899	-3.29456	-46.5824	-36.3495	-73.4718	-62.4295
100.104	14.3958	-96.8155	-26.6314	-7.04074	44.6829	-8.22549	-39.7918	-28.7747	-75.5568	-66.4536
100.104	14.4375	-96.9229	-26.6521	-6.1401	49.573	-18.616	-29.3454	-29.6159	-74.7023	-70.8129
100.104	14.4792	-96.848	-24.5136	0.498883	49.8001	-19.0494	-27.4427	-27.6305	-77.5157	-70.9788
100.104	14.5208	-96.755	-25.7436	0.719682	43.0218	-14.0595	-27.4037	-28.3621	-77.241	-70.1765
100.104	14.5625	-97.1057	-25.7861	-0.688931	47.288	-15.7739	-25.813	-23.474	-79.0818	-73.345
100.104	14.6042	-97.5355	-20.6407	-8.8252	47.4356	-14.7305	-19.6882	-24.5805	-82.6248	-74.2562
100.104	14.6458	-97.6433	-15.7033	-11.2849	53.909	-12.7791	-23.1542	-27.3681	-83.1208	-75.0816
100.104	14.6875	-97.6807	-13.8795	-13.7143	54.1376	-13.0842	-28.6233	-32.2811	-81.8852	-73.3925
100.104	14.7292	-97.7768	-18.9994	-15.6427	50.324	-5.88623	-32.0799	-39.2801	-83.1546	-66.8968
100.104	14.7708	-97.9523	-20.0096	-13.7636	48.2926	0.62544	-36.8849	-50.1541	-81.5573	-65.7136
100.104	14.8125	-98.2256	-27.881	-12.0432	50.3565	3.84242	-41.9733	-49.7621	-82.4628	-64.9553
100.104	14.8542	-98.286	-26.4197	-17.2301	63.944	6.33652	-50.478	-47.9638	-82.6174	-63.9605
100.104	14.8958	-98.2384	-21.8877	-14.0789	65.3178	-0.257559	-53.8266	-50.2551	-81.3384	-62.8647
100.104	14.9375	-98.0666	-14.136	-19.4528	66.2817	-4.67972	-50.7828	-56.3549	-79.024	-60.8568
100.104	14.9792	-98.0332	-15.4952	-16.5491	81.5806	-14.8871	-50.2543	-59.7395	-76.1602	-62.2036
100.104	15.0208	-97.9252	-16.5761	-19.5173	84.9102	-7.36764	-58.0107	-60.7155	-75.0978	-56.0796
100.104	15.0625	-97.6847	-23.6931	-13.9469	103.396	-9.62553	-61.8305	-52.5962	-75.4882	-56.7502
100.104	15.1042	-96.9254	-20.2274	-10.5369	116.864	-13.2273	-63.9767	-46.0499	-74.5202	-53.7669
100.104	15.1458	-95.3747	-13.5425	-9.21821	133.149	-17.2687	-63.7297	-40.0783	-71.2798	-51.0545
100.104	15.1875	-91.6509	-23.386	-2.10009	152.695	-12.917	-62.7648	-34.4961	-60.2019	-47.8884
100.104	15.2292	-84.4404	-14.4167	-2.88297	159.966	-10.0785	-61.0611	-21.0912	-54.6163	-42.5719
100.104	15.2708	-72.1582	-23.57	-2.33709	180.928	-13.1332	-54.333	-10.3538	-40.3882	-37.3691
100.104	15.3125	-39.0779	-18.9097	-2.79015	207.01	-8.49915	-45.3324	3.17324	-30.1124	-30.2056
100.104	15.3542	16.1396	-24.2973	15.7654	187.521	-0.299159	-44.9177	23.0047	-15.5559	-19.1987
100.104	15.3958	105.708	-16.6749	15.5297	202.613	2.68987	-43.9737	36.1426	2.02044	-11.6323
100.104	15.4375	119.667	-22.7886	17.3467	208.825	1.68945	-36.1418	38.1358	-1.59783	-11.0603
100.104	15.4792	141.371	-22.8402	16.6909	209.953	2.75517	-33.152	33.8916	6.58764	-11.7718
100.104	15.5208	136.15	-28.6602	13.145	221.959	0.764841	-33.1884	39.0712	4.70091	-7.30189
100.104	15.5625	91.3654	-30.6263	-4.0695	226.044	-1.76261	-28.7437	31.2499	5.30895	-8.847
100.104	15.6042	53.7641	-36.288	5.74431	196.839	-2.97903	-31.1779	34.1023	-1.43845	-12.8799
100.104	15.6458	18.8897	-32.2864	-14.0026	159.081	0.946605	-32.1264	34.8505	-9.25562	-6.00973
100.104	15.6875	-10.4556	-38.3927	-20.9146	158.732	-0.167149	-35.0358	34.773	-11.4299	-8.24673
100.104	15.7292	-33.0268	-43.1255	-17.1217	106.822	-1.93884	-29.3162	17.5044	-6.60217	-9.68958
100.104	15.7708	-53.1876	-43.3274	-28.0215	86.4968	-1.48399	-27.1846	5.40391	-5.27225	-14.089
100.104	15.8125	-66.1726	-38.8085	-30.9114	62.2355	-1.99647	-26.2868	-2.77366	-16.2046	-16.202
100.104	15.8542	-74.5799	-35.4505	-32.1479	34.3881	0.368062	-25.8952	-11.8983	-23.9071	-13.3856
100.104	15.8958	-75.7736	-32.4567	-29.7016	19.5327	2.98057	-21.0772	-12.2864	-28.5385	-16.2127
100.104	15.9375	-79.1268	-35.4315	-32.0561	17.6273	-4.48746	-2.65141	-18.1831	-29.3008	-24.7924
100.104	15.9792	-83.3846	-34.7743	-35.3794	0.296901	0.680287	12.837	-25.8885	-37.4785	-25.3341
100.104	16.0208	-85.7592	-37.2006	-34.8156	-20.3219	3.36264	27.7673	-34.8024	-36.3849	-20.2886
100.104	16.0625	-84.4609	-35.5786	-33.9448	-21.656	1.23789	48.5671	-37.2609	-39.9274	-17.7751
100.104	16.1042	-85.3913	-39.9152	-32.655	-26.4511	4.75032	63.2923	-39.3195	-40.6374	-20.3321
100.104	16.1458	-77.5478	-45.4777	-21.0433	-20.4362	13.2312	95.4275	-39.0175	-41.3952	-17.1122
100.104	16.1875	-51.0833	-45.6512	-1.25112	-8.67254	28.7212	149.261	-35.4721	-45.3125	-11.8558
100.104	16.2292	38.6561	-37.0644	29.9794	12.7072	48.4501	198.377	-43.8471	-38.4142	-1.82143
100.104	16.2708	325.476	-21.9135	91.1502	18.0529	93.98	224.787	-44.6628	-33.5835	4.27948
100.104	16.3125	520.034	-16.7859	113.122	16.746	118.512	268.378	-50.5005	-24.7102	-0.17422
100.104	16.3542	162.243	-24.1968	70.4435	-8.57003	94.0295	250.601	-53.1455	-29.5732	-1.10452
100.104	16.3958	12.0825	-32.6885	39.3356	-25.7925	60.8659	209.165	-55.6273	-21.6549	-6.85573
100.104	16.4375	-47.4072	-39.1099	15.6711	-44.8178	40.4211	204.021	-54.2293	-28.8909	-2.6119
100.104	16.4792	-71.9247	-44.3193	-0.806695	-55.4993	34.2681	189.915	-56.5216	-33.9686	2.21235
100.104	16.5208	-80.0466	-41.3254	-9.85732	-54.6521	9.00675	207.386	-57.1774	-42.898	1.53515
100.104	16.5625	-87.8334	-38.0326	-13.9767	-54.1061	5.79805	153.614	-55.605	-47.5722	-20.3679
100.104	16.6042	-90.5608	-35.3603	-8.41378	-55.5312	9.67933	123.261	-60.7078	-57.1522	-13.0279
100.104	16.6458	-89.4274	-27.3758	-3.29478	-53.3668	20.0288	98.4828	-62.6787	-55.8588	-17.7481
100.104	16.6875	-86.7517	-20.5203	11.8551	-45.5964	10.4601	104.101	-62.4757	-61.7331	-15.3875
100.104	16.7292	-84.4207	-10.188	24.9912	-41.9958	22.2038	87.4684	-60.1236	-63.2974	-28.6411
100.104	16.7708	-82.3964	-0.0321469	38.3751	-39.1488	27.1082	80.9627	-63.2091	-62.6968	-33.753
100.104	16.8125	-88.6124	4.84248	25.7923	-43.5144	25.6334	60.8174	-65.7579	-66.4306	-34.1795
100.104	16.8542	-92.9885	1.09919	18.479	-38.0007	4.66851	50.008	-67.6536	-71.6451	-34.438
100.104	16.8958	-95.9664	-1.16952	18.1404	-42.2744	-3.71068	44.5619	-69.9917	-74.4686	-43.8844
100.104	16.9375	-97.7239	-3.86699	15.8779	-40.2542	-13.4933	31.8721	-73.2841	-76.3549	-52.543
100.104	16.9792	-98.4248	-5.07032	6.59438	-42.3227	-16.1632	19.2785	-72.7333	-79.8865	-50.7867
100.104	17.0208	-98.3458	0.38301	12.3513	-38.3446	-18.1916	17.1009	-70.1985	-83.2927	-50.1257
100.104	17.0625	-98.2471	0.962609	25.8844	-38.1049	-12.9983	12.6319	-72.5971	-81.2813	-55.6697
100.104	17.1042	-98.0653	9.8349	36.5237	-36.8152	-13.7361	10.6025	-74.956	-80.315	-56.5872
100.104	17.1458	-97.8891	25.3631	49.4889	-39.3456	-15.2581	9.98544	-75.1073	-82.8214	-53.4064
100.104	17.1875	-97.7889	31.1971	65.9584	-33.9056	-19.4238	14.6594	-77.3736	-83.5666	-55.2735
100.104	17.2292	-97.4556	39.4686	81.2011	-32.825	-12.6717	8.49071	-76.8463	-83.9074	-57.5435
100.104	17.2708	-96.2882	77.475	107.363	-30.3744	-7.32087	15.1056	-76.8442	-86.0579	-57.9385
100.104	17.3125	-94.8798	95.2204	127.848	-27.7028	1.31868	19.8083	-76.1042	-87.671	-55.4783
100.104	17.3542	-93.4591	93.1987	147.357	-20.3186	4.12393	21.9217	-75.1069	-88.0356	-54.5694
100.104	17.3958	-92.1583	98.9188	191.412	-17.2562	-0.133778	29.8644	-78.652	-86.9045	-54.9075
100.104	17.4375	-92.8989	80.8336	189.24	-13.3477	7.80536	18.2197	-76.3608	-87.5831	-58.1178
100.104	17.4792	-93.0211	79.0409	154.463	-7.13457	13.4624	21.8134	-76.9783	-85.8267	-63.4238
100.104	17.5208	-91.2351	80.0327	162.367	-6.85026	7.66325	24.7922	-77.012	-84.8663	-57.3806
100.104	17.5625	-87.4623	107.804	156.886	-13.2988	14.367	21.3272	-73.2528	-84.882	-51.7201
100.104	17.6042	-87.2271	87.6613	166.606	-17.2846	12.8831	34.6654	-71.1683	-83.6082	-57.0385
100.104	17.6458	-82.4468	110.564	162.34	-20.4806	17.5862	38.0336	-70.9816	-81.7717	-53.4549
100.104	17.6875	-76.9084	143.492	151.472	-13.5236	2.25082	51.5861	-72.1174	-78.5779	-52.8956
100.104	17.7292	-78.8091	132.711	144.815	-10.0647	10.7963	34.4406	-73.4713	-78.546	-51.2154
100.104	17.7708	-79.0484	104.001	147.522	-14.3736	-2.52601	39.9331	-70.8916	-73.9121	-53.216
100.104	17.8125	-73.6657	99.9899	123.969	-22.9792	12.8815	32.4458	-66.7697	-70.6941	-47.5714
100.104	17.8542	-70.1137	83.8193	118.555	-15.5125	1.44456	39.079	-62.2582	-67.6267	-48.9229
100.104	17.8958	-64.1225	73.3979	132.864	-31.2067	13.1724	42.9667	-51.4395	-71.4074	-42.5065
100.104	17.9375	-53.9008	64.9401	124.209	-33.177	11.0899	65.2298	-54.6242	-65.1222	-35.7828
100.104	17.9792	-45.8448	65.1679	104.817	-30.8686	8.50067	59.8722	-50.6186	-60.3984	-31.736
100.104	18.0208	-39.3976	53.7797	103.898	-28.1569	7.9443	57.3277	-50.6149	-55.1587	-28.4657
100.104	18.0625	-28.1386	47.7436	113.556	-30.6092	8.17281	48.0598	-46.8264	-49.6519	-23.4511
100.104	18.1042	-9.51113	60.9677	104.874	-26.8207	-0.847064	54.511	-43.4402	-45.8839	-20.0383
100.104	18.1458	0.374203	66.4223	101.878	-30.5306	2.44456	65.195	-45.8725	-41.8279	-19.2932
100.104	18.1875	6.6648	51.3545	96.0308	-31.4523	1.64	60.921	-41.0806	-42.8478	-4.77726
100.104	18.2292	12.5883	38.1878	113.46	-37.3122	0.39494	69.8707	-39.5965	-37.7961	-4.98031
100.104	18.2708	30.8062	42.2192	97.8243	-33.4703	-1.45705	63.3854	-36.7703	-34.0199	4.04036
100.104	18.3125	62.493	47.4481	118.419	-35.6756	-0.302364	69.6006	-44.34	-18.2032	1.89129
100.104	18.3542	90.5712	46.4819	113.504	-38.5219	6.32217	72.1036	-45.5717	-15.8507	18.2654
100.104	18.3958	88.929	42.1748	91.0533	-31.8741	-7.25995	98.7792	-48.5847	-3.44287	11.5564
100.104	18.4375	93.1918	41.2639	91.2373	-33.1651	-2.28425	87.1335	-49.0277	-4.71547	20.4782
100.104	18.4792	121.721	36.3369	100.478	-34.9373	1.29001	93.3205	-51.1037	-4.13845	35.8407
100.104	18.5208	149.958	39.26	91.7904	-39.3588	9.20481	101.831	-52.5053	0.410868	46.8219
100.104	18.5625	149.281	32.3004	102.435	-34.8176	5.6778	87.695	-54.6745	16.3707	36.4862
100.104	18.6042	158.385	43.5826	85.7911	-35.816	8.82426	74.5466	-50.0921	21.3782	31.1493
100.104	18.6458	123.995	37.4055	77.5826	-48.1122	27.7613	86.6206	-51.4391	2.80745	48.6276
100.104	18.6875	95.8789	29.7048	79.0304	-49.5738	29.1044	99.4652	-55.8918	0.202579	46.9744
100.104	18.7292	101.565	46.238	105.535	-52.6187	29.7499	79.7389	-56.1961	-8.81348	51.939
100.104	18.7708	96.3059	52.4469	89.8279	-55.2965	39.6684	79.2285	-57.9906	-11.2101	62.5166
100.104	18.8125	65.221	44.3552	84.6689	-61.092	41.2179	97.3508	-60.7659	-7.38784	57.304
100.104	18.8542	56.282	36.1063	64.7004	-56.2788	27.8514	106.644	-60.1769	-6.05239	61.3227
100.104	18.8958	45.3833	48.4169	58.1081	-56.1114	26.4001	102.414	-56.754	-12.6526	46.0637
100.104	18.9375	38.0856	42.254	54.1313	-57.1115	29.159	120.96	-60.4104	-5.4191	37.4137
100.104	18.9792	26.3199	37.8691	66.3183	-58.8978	31.3483	118.268	-58.7017	-12.5665	29.4718
100.104	19.0208	27.6731	35.177	68.0099	-57.1622	28.7682	122.214	-59.385	-10.8916	26.7212
100.104	19.0625	10.7551	35.5876	51.6764	-54.2022	21.7633	128.337	-51.1089	-24.9687	15.2964
100.104	19.1042	20.8065	34.3855	47.6112	-55.2429	28.4782	148.741	-49.5567	-25.2733	12.9535
100.104	19.1458	37.2045	38.8715	61.3891	-58.4133	38.5509	137.068	-48.1459	-31.8568	26.835
100.104	19.1875	24.6531	34.4496	52.0338	-57.9036	38.7147	135.059	-43.3992	-28.7923	10.2322
100.104	19.2292	47.8836	43.1706	66.0207	-58.4019	30.6813	169.457	-43.3607	-29.0169	5.64655
100.104	19.2708	59.4116	53.2582	61.0137	-56.8852	26.2634	182.842	-40.5766	-29.2799	-0.164264
100.104	19.3125	74.5974	47.085	69.5609	-55.1991	28.6367	178.816	-33.381	-32.0112	-3.80804
100.104	19.3542	67.7747	60.6583	77.4719	-56.4901	33.7765	172.629	-32.9251	-32.1295	-18.546
100.104	19.3958	83.884	55.9737	92.8425	-56.7328	27.3974	173.249	-32.7172	-29.0917	-14.9232
100.104	19.4375	87.2261	59.1737	72.718	-48.7924	23.5882	173.116	-33.1902	-28.6294	-17.3696
100.104	19.4792	94.7311	54.5385	74.7633	-46.5475	25.7583	167.757	-36.8283	-29.2677	-10.3474
100.104	19.5208	94.837	43.246	73.3425	-48.5681	35.2182	148.288	-31.2532	-29.5378	-6.18912
100.104	19.5625	95.3077	50.4609	72.0648	-45.8475	26.9382	163.346	-36.3109	-27.9483	-9.18519
100.104	19.6042	86.4217	40.3425	78.6813	-43.2149	12.9806	166.567	-32.3304	-27.8131	-11.012
100.104	19.6458	77.3492	22.6527	83.2063	-43.0965	9.17033	185.811	-34.7972	-28.2742	-4.95088
100.104	19.6875	57.9046	34.4331	72.5782	-44.2927	28.9148	156.435	-31.1005	-34.4456	-18.1739
100.104	19.7292	30.7726	30.6304	74.1473	-44.1669	32.125	138.416	-23.8389	-43.3561	-24.237
100.104	19.7708	24.3455	33.0306	42.5161	-33.039	38.6468	127.721	-33.4861	-38.5834	-24.058
100.104	19.8125	24.2267	24.9578	65.9009	-40.5105	56.7439	121.503	-35.3697	-42.7872	-21.5376
100.104	19.8542	22.2044	25.463	62.9896	-36.0833	63.8146	99.7447	-36.0521	-45.2516	-18.3847
100.104	19.8958	24.7188	21.5283	69.4574	-36.1308	63.6925	115.293	-40.3014	-41.6346	-22.7811
100.104	19.9375	34.1844	34.9378	81.4756	-35.1435	48.7414	117.186	-35.6326	-45.9627	-24.8076
100.104	19.9792	34.9795	38.247	85.3557	-32.4832	41.075	131.797	-40.0073	-44.5583	-28.2697
100.104	20.0208	37.1935	36.119	68.4266	-28.0644	41.453	130.222	-37.2236	-44.4424	-26.7577
100.104	20.0625	28.5912	34.5054	68.1479	-33.1189	61.3671	85.6345	-31.9255	-41.7396	-28.4442
100.104	20.1042	22.5081	31.037	68.5028	-34.3174	45.2055	85.6971	-35.5928	-44.1623	-12.891
100.104	20.1458	23.6998	54.4828	60.7465	-35.2555	44.4992	83.2551	-42.2475	-39.6576	-16.6263
100.104	20.1875	-13.0889	47.2552	55.7058	-31.2242	24.4737	77.9062	-41.8393	-45.1661	-21.96
100.104	20.2292	-11.7868	64.9915	55.9667	-37.4654	16.928	88.448	-48.7101	-47.298	-7.96551
100.104	20.2708	-34.9064	59.1808	52.0213	-38.2829	14.8953	57.3163	-51.502	-46.1906	-7.59831
100.104	20.3125	-45.8736	40.2729	68.4922	-38.3939	9.03052	44.2997	-52.8968	-49.8662	0.0546218
100.104	20.3542	-59.6159	10.4486	53.7564	-31.8431	12.9382	26.7233	-48.1792	-45.4699	-13.7281
100.104	6.52083	-73.3862	-29.3971	-2.49859	5.15463	-42.9434	-18.5667	16.5185	-19.8606	-15.2584
100.104	6.5625	-75.8472	-27.8085	-7.09658	0.274187	-40.0744	-22.059	17.7709	-10.5485	-27.0113
100.104	6.60417	-76.5658	-33.6564	-4.76669	5.09337	-39.7759	-24.425	10.7023	-14.3658	-18.2036
100.104	6.64583	-78.8226	-33.9204	-9.36443	21.8984	-49.3551	-27.9684	8.01468	-7.61712	-20.3152
100.104	6.6875	-79.7813	-42.2791	-0.296236	12.083	-42.5054	-29.7531	5.16721	-12.4723	-15.688
100.104	6.72917	-78.0833	-42.5722	-3.12352	9.45113	-42.0549	-25.9777	4.42085	-7.23741	-13.3687
100.104	6.77083	-78.571	-34.566	-11.1916	12.3392	-41.3719	-30.6238	13.8483	-12.322	-19.1499
100.104	6.8125	-79.0339	-34.3645	-16.4273	34.8603	-48.3082	-32.253	28.7514	-17.7603	-23.5661
100.104	6.85417	-81.3595	-40.0122	-13.3411	27.7545	-52.6462	-30.6872	33.4507	-16.4595	-23.2957
100.104	6.89583	-81.6828	-41.7803	-8.09254	13.8633	-54.8755	-23.3306	44.7059	-22.8089	-22.2024
100.104	6.9375	-80.6777	-34.5556	-6.46941	8.91457	-57.9036	-16.2663	53.0031	-22.3001	-30.8357
100.104	6.97917	-82.1247	-43.2971	2.33938	3.51676	-59.2393	-8.87225	57.2114	-27.4706	-29.7406
100.104	7.02083	-82.5855	-39.1398	-0.585812	7.43694	-63.5202	-9.26794	59.8717	-28.0584	-29.6264
100.104	7.0625	-83.0736	-33.7442	-11.5444	17.6384	-63.5066	-16.9252	46.5378	-24.0542	-27.2339
100.104	7.10417	-86.9411	-39.1296	-18.8146	30.9401	-62.8678	-26.6178	72.3919	-37.4763	-31.2859
100.104	7.14583	-85.8803	-36.2225	-12.5985	23.8828	-58.7264	-30.6139	68.4663	-38.0663	-31.5705
100.104	7.1875	-86.3846	-32.4847	-8.90495	19.7189	-57.2531	-38.1583	34.6651	-28.3434	-27.5105
100.104	7.22917	-86.8675	-29.9851	-16.6037	27.1578	-60.6258	-40.6643	35.7292	-28.9204	-21.527
100.104	7.27083	-85.4342	-29.4893	-16.6246	32.182	-66.0058	-37.583	39.8791	-23.1203	-17.8519
100.104	7.3125	-87.3598	-35.1142	-9.90179	21.8578	-67.7727	-33.4689	20.3104	-10.1471	-23.4486
100.104	7.35417	-87.6334	-34.3059	-0.960214	6.74836	-67.1496	-36.1741	28.1387	-10.5328	-25.925
100.104	7.39583	-87.0105	-31.3291	-7.44903	4.65273	-67.7584	-37.6466	23.4753	-3.37669	-18.5767
100.104	7.4375	-86.4944	-28.4777	-5.52524	2.91811	-67.7613	-41.2274	26.6385	-4.02596	-15.6677
100.104	7.47917	-85.9427	-25.3187	-11.812	-1.55757	-66.1862	-36.5807	24.8475	-5.08717	-14.675
100.104	7.52083	-84.9572	-19.9825	-10.7146	-11.7792	-60.5893	-44.2713	33.0625	-7.72759	-11.4945
100.104	7.5625	-86.4412	-19.3467	-16.5584	-3.64832	-62.5894	-41.187	31.4662	-11.3118	-18.4903
100.104	7.60417	-85.828	-23.5112	-5.93741	-4.14081	-64.5232	-37.2571	22.0237	-6.91054	-18.7303
100.104	7.64583	-86.2158	-29.2413	-10.7046	-10.9933	-60.256	-40.0309	24.2369	-6.22745	-11.728
100.104	7.6875	-85.7378	-30.1034	-6.17804	-7.97877	-60.8012	-36.5594	9.1971	-3.19267	-10.0964
100.104	7.72917	-84.9785	-17.1412	-7.94731	-8.09762	-58.4784	-44.7998	19.6392	0.864008	-22.5203
100.104	7.77083	-83.3187	-10.4603	3.36489	-18.7056	-59.4837	-36.5328	20.1963	-5.22166	-24.3162
100.104	7.8125	-84.4586	-27.964	17.7157	-24.4111	-58.3452	-34.769	10.1649	-3.26154	-16.2687
100.104	7.85417	-81.5954	-14.3486	-0.139899	-22.2101	-57.0371	-33.1081	9.58441	-2.43889	-9.97089
100.104	7.89583	-82.7444	-23.0304	-1.7307	-17.2749	-59.1546	-32.6032	12.3006	-6.33303	-4.76353
100.104	7.9375	-82.93	-27.8829	4.70708	-14.4686	-56.4649	-33.5659	-0.319227	7.55879	-14.7671
100.104	7.97917	-80.1745	-30.9784	21.052	-15.9044	-54.6594	-37.384	-0.958825	5.85237	-5.20058
100.104	8.02083	-80.6336	-37.3361	26.0506	-11.8417	-52.2927	-36.8033	-12.2064	17.9452	-10.9159
100.104	8.0625	-75.9552	-8.77864	13.1009	-12.369	-58.7367	-27.4386	-2.64916	1.57482	-10.1735
100.104	8.10417	-72.2791	-1.85799	11.6336	-14.1123	-54.9932	-31.9207	-6.91685	-0.2438	3.54343
100.104	8.14583	-71.9088	7.86067	11.6084	-17.5121	-57.4023	-24.3861	-9.88351	6.17266	-8.20587
100.104	8.1875	-73.7743	0.341006	18.1192	-14.3062	-58.4931	-30.7366	-14.9306	9.43017	-3.51854
100.104	8.22917	-71.5706	5.88397	27.4531	-26.1989	-54.1303	-34.721	-3.98058	-14.5226	16.1489
100.104	8.27083	-75.4646	13.6613	6.50282	-22.2448	-52.6331	-36.4833	-4.06612	-8.50036	-1.29601
100.104	8.3125	-78.1354	9.46587	6.48188	-28.4208	-51.6195	-31.667	1.09005	-20.6569	-1.17156
100.104	8.35417	-77.691	11.5181	-1.99265	-24.2603	-49.0681	-40.3549	5.93548	-20.6245	5.50188
100.104	8.39583	-75.5491	16.0396	0.599472	-13.1677	-53.092	-37.7144	-13.8833	0.118333	-4.24158
100.146	13.4792	-75.6232	10.4629	0.809007	-29.6819	-48.8089	-31.5612	8.76795	-19.3947	1.35213
100.146	13.5208	-94.7441	-39.5345	-14.5954	107.703	-2.68544	-82.4487	-77.2925	17.6506	7.39044
100.146	13.5625	-95.3196	-47.7882	-12.5125	101.384	-0.22985	-82.4065	-78.2733	26.1679	5.74162
100.146	13.6042	-94.9813	-50.9942	-7.72624	108.077	-3.78582	-83.7551	-76.4688	29.1413	12.2988
100.146	13.6458	-94.7569	-50.1603	-11.7154	113.741	-3.89128	-84.7818	-75.9645	36.9849	15.7677
100.146	13.6875	-95.0099	-53.0221	-8.87405	118.237	-16.4955	-84.4101	-73.0886	33.9988	13.7775
100.146	13.7292	-95.231	-52.4196	-13.0608	126.527	-21.4816	-85.9535	-68.3677	33.4557	9.31019
100.146	13.7708	-95.9632	-59.1369	-0.0422437	110.241	-17.2234	-86.8555	-69.7858	46.0537	-2.09793
100.146	13.8125	-95.9699	-54.1791	-5.87022	126.62	-21.0301	-86.9233	-68.5482	38.4984	-8.34047
100.146	13.8542	-96.4925	-57.2051	0.714904	122.767	-21.7855	-86.7111	-68.0051	30.657	-15.9252
100.146	13.8958	-96.5163	-57.2647	9.23629	129.699	-18.3677	-86.6276	-69.9951	33.5692	-25.7383
100.146	13.9375	-96.2589	-53.0905	-1.19414	132.418	-8.67597	-87.5667	-64.1615	25.0264	-31.7401
100.146	13.9792	-95.8509	-45.5192	-5.85168	132.344	-10.2902	-84.9545	-65.2641	21.8867	-39.0768
100.146	14.0208	-95.7683	-45.6275	7.34475	116.055	-13.2433	-82.7277	-63.0244	-2.91141	-37.6191
100.146	14.0625	-95.9418	-44.3061	8.20783	107.296	-17.3319	-81.2706	-60.1696	-9.43624	-41.8368
100.146	14.1042	-95.8417	-44.9265	15.2922	98.6992	-16.3806	-79.5519	-55.9121	-27.2089	-39.9356
100.146	14.1458	-96.4585	-36.9047	2.0712	98.4081	-21.8159	-74.5592	-59.6754	-36.1773	-45.8577
100.146	14.1875	-96.6826	-32.1737	-3.75663	98.265	-20.6718	-71.0388	-61.1711	-45.1886	-47.5777
100.146	14.2292	-97.0646	-33.593	2.25828	92.3811	-18.9072	-71.2552	-55.992	-50.7196	-55.5534
100.146	14.2708	-97.1426	-34.2976	-5.70017	91.274	-14.5417	-65.7456	-53.4579	-60.8464	-54.8011
100.146	14.3125	-97.2378	-35.4119	7.2303	53.8612	-13.5399	-58.6567	-51.9305	-64.0051	-58.0895
100.146	14.3542	-97.1216	-30.6437	-0.886088	59.2261	-22.1292	-51.5784	-49.8121	-65.9026	-59.2453
100.146	14.3958	-97.309	-31.9072	-3.62713	51.2259	-20.2234	-45.9593	-50.2827	-66.7339	-61.97
100.146	14.4375	-97.0794	-30.7775	-1.81864	61.0984	-24.3546	-45.5162	-31.6018	-74.0493	-63.5365
100.146	14.4792	-97.2836	-27.1182	-16.0667	67.2525	-21.7929	-32.9779	-38.8183	-74.6315	-67.3651
100.146	14.5208	-97.2065	-29.4066	-9.96013	58.74	-15.1026	-34.4716	-36.6229	-76.1979	-67.0092
100.146	14.5625	-97.2168	-27.5108	-8.88298	57.5436	-17.4146	-33.5963	-31.6465	-75.581	-70.78
100.146	14.6042	-97.361	-24.9048	-3.6171	46.2156	-4.99892	-38.137	-27.1574	-78.7168	-72.6312
100.146	14.6458	-97.7333	-22.6776	-9.61767	45.6679	-5.58859	-26.3745	-20.868	-84.7025	-73.5378
100.146	14.6875	-97.8385	-17.2641	-17.1567	64.7887	-6.63429	-26.8508	-25.1788	-83.2464	-77.6466
100.146	14.7292	-97.7056	-15.9196	-17.7881	56.3272	-3.94061	-29.4691	-32.482	-82.2582	-73.8383
100.146	14.7708	-97.9697	-15.0483	-20.6451	58.5934	-6.92168	-36.4508	-42.0134	-80.3151	-71.8736
100.146	14.8125	-98.011	-25.7095	-15.4954	59.7259	-4.18432	-43.8337	-45.2064	-81.9114	-62.8131
100.146	14.8542	-98.1234	-23.9267	-14.2898	48.0546	-1.93843	-41.8773	-53.4623	-79.9168	-63.5081
100.146	14.8958	-98.3492	-30.6409	-15.2147	58.6099	5.28325	-51.1062	-54.5477	-80.3643	-61.4765
100.146	14.9375	-98.345	-24.4884	-12.7076	67.4374	-1.55616	-57.0109	-57.5497	-79.748	-58.7845
100.146	14.9792	-98.2331	-15.5408	-17.4089	68.43	0.597275	-57.4232	-59.4494	-77.9437	-60.7423
100.146	15.0208	-98.1502	-17.3283	-19.0501	90.9088	-9.66931	-58.2724	-56.19	-79.1451	-57.9577
100.146	15.0625	-98.0749	-21.0981	-19.0043	102.787	-10.334	-62.8203	-57.175	-78.0721	-52.5492
100.146	15.1042	-97.6329	-14.6631	-16.338	115.019	-12.348	-62.8979	-57.4674	-74.6542	-56.0166
100.146	15.1458	-97.2271	-22.5411	-5.47167	114.175	-11.1785	-63.569	-54.4367	-75.2522	-51.5386
100.146	15.1875	-95.971	-16.9173	-3.92416	126.844	-10.5289	-64.7344	-48.2776	-73.3907	-48.7608
100.146	15.2292	-92.928	-15.9815	-6.17009	142.466	-6.54205	-62.9199	-40.8911	-64.3802	-49.2922
100.146	15.2708	-87.4919	-21.5137	12.4334	155.728	-12.3483	-60.5185	-29.0665	-54.1507	-50.7524
100.146	15.3125	-76.4369	-28.4758	13.3973	192.474	-15.8681	-57.858	-7.90455	-43.0692	-46.5646
100.146	15.3542	-58.7529	-28.7291	10.1666	194.234	-10.435	-53.4128	5.6793	-30.4548	-41.7794
100.146	15.3958	-14.6519	-24.3101	15.6165	198.3	-3.53818	-46.9722	8.87779	-16.0492	-30.0707
100.146	15.4375	53.9241	-11.3992	15.3984	200.413	-1.79568	-42.2889	25.0486	-13.3632	-18.383
100.146	15.4792	89.4267	-17.5099	31.1592	205.867	-4.61664	-44.134	30.1737	-5.95869	-12.2504
100.146	15.5208	126.685	-16.8866	24.9582	217.657	-2.42084	-45.8447	44.9325	-1.07146	-9.31356
100.146	15.5625	108.55	-21.7126	14.3175	222.752	-8.5893	-34.7959	30.2805	7.03593	-13.1328
100.146	15.6042	71.4345	-30.5091	6.1236	220.943	-3.28131	-38.2811	37.4112	-2.28192	-9.63404
100.146	15.6458	29.2603	-37.9407	-4.16527	223.141	-9.50479	-39.5487	51.4404	-4.30736	-15.1616
100.146	15.6875	-8.28855	-40.4472	-17.7438	193.884	-7.34554	-37.8042	39.539	-4.10052	-17.3891
100.146	15.7292	-27.3556	-37.2307	-19.7496	149.33	-7.40268	-36.3368	43.6067	-18.3978	-16.2721
100.146	15.7708	-42.1463	-37.5281	-23.2114	101.573	-10.3673	-23.8373	9.98016	-12.0815	-9.36103
100.146	15.8125	-55.8444	-35.2787	-33.1555	86.076	-2.59578	-28.7811	7.07606	-14.633	-13.4979
100.146	15.8542	-68.398	-36.5751	-34.1336	54.9961	-0.691514	-28.8566	-1.90869	-15.2648	-16.8897
100.146	15.8958	-75.1596	-32.7579	-35.4184	38.3589	-7.55688	-25.0888	-7.72553	-25.0652	-13.6593
100.146	15.9375	-78.5319	-33.2422	-33.6891	18.2787	-3.21219	-21.9581	-11.7841	-32.3008	-9.10906
100.146	15.9792	-81.0347	-34.4037	-33.7406	7.4188	-3.82563	-8.05426	-18.5187	-33.9096	-14.6968
100.146	16.0208	-84.8588	-33.4776	-37.6537	-4.26492	-0.599335	5.45346	-21.2043	-44.9081	-16.1949
100.146	16.0625	-85.9755	-34.5702	-35.4378	-14.5574	-4.63436	22.2851	-34.5888	-38.1129	-17.6923
100.146	16.1042	-88.8196	-32.8936	-42.2553	-25.5359	-6.00875	52.606	-43.2451	-41.9899	-17.9518
100.146	16.1458	-89.2557	-38.8768	-40.657	-33.181	6.84582	58.6332	-46.4477	-44.4748	-12.0402
100.146	16.1875	-84.2285	-49.28	-33.0438	-24.8918	16.6142	92.4363	-45.7327	-41.5998	-13.0593
100.146	16.2292	-64.9428	-50.7695	-16.6736	-6.5825	20.7537	143.138	-44.2173	-40.7696	-5.69506
100.146	16.2708	-19.5845	-46.6325	19.6358	0.445221	48.5286	179.427	-45.7793	-37.3475	-11.0611
100.146	16.3125	139.115	-34.0599	58.9473	12.0053	79.8635	234.592	-48.3202	-36.202	2.65497
100.146	16.3542	290.285	-25.5685	86.7828	8.30781	101.064	249.555	-51.0837	-31.6246	10.262
100.146	16.3958	117.351	-28.2736	65.7342	-13.8571	95.3862	212.76	-50.6128	-35.8779	9.67947
100.146	16.4375	2.62779	-37.7513	41.3749	-26.6833	57.0448	205.279	-56.037	-27.6105	4.2498
100.146	16.4792	-52.3433	-44.2628	11.4183	-45.32	27.2804	241.161	-55.9176	-34.8488	12.5341
100.146	16.5208	-76.8944	-45.2087	-10.8221	-55.5737	20.9147	203.682	-56.563	-33.3444	0.118178
100.146	16.5625	-83.5342	-41.8266	-25.7804	-54.8211	9.2515	167.089	-53.4579	-46.5431	16.2707
100.146	16.6042	-90.1857	-40.4775	-19.1893	-56.46	-1.67707	148.203	-56.497	-45.8527	-18.4802
100.146	16.6458	-89.4842	-36.0593	-11.4482	-54.4094	1.19354	143.438	-60.8209	-48.209	-18.5031
100.146	16.6875	-85.7738	-26.6691	5.36833	-51.3131	15.1047	98.6046	-57.0445	-55.3517	-13.7472
100.146	16.7292	-82.3278	-16.2951	17.5898	-47.5555	26.8188	85.8201	-57.6051	-56.947	-20.4068
100.146	16.7708	-76.5502	-5.92462	34.3575	-41.9899	35.6524	81.0604	-57.9554	-58.0076	-26.2493
100.146	16.8125	-70.5832	10.5572	63.5698	-40.9027	35.4244	92.3348	-61.0883	-59.1647	-33.4931
100.146	16.8542	-80.3288	14.4545	60.3399	-42.1809	24.336	78.1007	-64.3479	-67.7062	-27.286
100.146	16.8958	-88.4943	13.3428	42.9816	-37.2343	12.8261	58.6346	-68.4896	-69.0769	-35.1408
100.146	16.9375	-92.9829	12.3017	35.6421	-40.1847	3.06912	45.9462	-69.8079	-73.3195	-36.4445
100.146	16.9792	-96.404	6.45712	24.304	-36.7499	-15.8687	48.2526	-71.5024	-76.5334	-48.4918
100.146	17.0208	-97.4142	-0.952575	6.24348	-37.4254	-10.1254	26.7091	-71.0782	-80.1335	-39.9851
100.146	17.0625	-97.8106	1.3547	15.3753	-38.1881	-16.4978	17.8039	-70.8699	-80.8838	-44.7031
100.146	17.1042	-97.594	3.36458	31.7506	-35.9484	-19.9795	19.0369	-72.7347	-79.5727	-48.0074
100.146	17.1458	-97.4285	12.3301	39.603	-36.3946	-21.1051	22.3028	-72.5618	-81.5893	-47.1078
100.146	17.1875	-97.2898	21.1702	53.5978	-36.4713	-13.4423	7.55052	-72.1913	-82.9336	-48.1185
100.146	17.2292	-97.093	45.5465	69.3244	-39.6448	-11.9929	14.3287	-75.2339	-83.1559	-53.4386
100.146	17.2708	-96.4833	63.9381	76.4581	-35.2386	-9.86403	17.2685	-76.5666	-83.1032	-55.1481
100.146	17.3125	-95.2204	79.1077	88.7104	-28.1583	1.04891	16.0566	-76.5713	-84.1394	-54.8318
100.146	17.3542	-93.421	82.0792	163.781	-30.2169	2.32567	26.7612	-76.8957	-85.6376	-54.3949
100.146	17.3958	-91.9369	103.58	156.164	-24.2467	20.9002	21.7455	-75.4765	-87.569	-54.514
100.146	17.4375	-91.4738	81.2547	195.032	-19.0838	8.59837	38.2129	-75.4686	-86.9174	-59.0954
100.146	17.4792	-90.0432	88.8968	190.698	-15.6658	15.4675	37.3919	-75.2652	-87.3306	-56.7525
100.146	17.5208	-90.2401	75.0028	216.591	-18.4038	20.884	28.915	-74.2229	-85.5728	-62.7484
100.146	17.5625	-87.7371	89.3799	208.776	-19.2863	19.1882	33.666	-73.8964	-84.2491	-60.335
100.146	17.6042	-86.6249	83.6031	209.834	-22.7315	17.0604	42.4483	-70.7239	-84.9997	-58.4468
100.146	17.6458	-82.19	102.955	171.18	-19.2612	21.0499	45.9467	-70.8519	-82.1085	-56.498
100.146	17.6875	-78.3494	106.001	163.911	-19.2962	22.1667	51.4501	-69.4808	-79.3435	-57.6945
100.146	17.7292	-77.9329	102.417	151.348	-22.9918	25.97	41.968	-68.758	-79.2517	-51.4147
100.146	17.7708	-78.2155	102.538	164.837	-10.6307	10.3119	32.5484	-71.8831	-76.2797	-53.3999
100.146	17.8125	-77.0254	112.123	118.293	-13.1787	10.3074	33.5446	-70.2317	-74.6459	-48.6003
100.146	17.8542	-75.3724	80.6803	141.128	-18.1058	10.1555	35.3224	-63.8892	-74.9554	-48.7983
100.146	17.8958	-74.4651	69.2678	116.537	-18.4155	8.60144	45.6126	-64.8287	-67.83	-52.2752
100.146	17.9375	-65.2357	88.9376	99.654	-28.1739	5.09329	73.2128	-60.5161	-70.5571	-39.3683
100.146	17.9792	-56.1321	92.3113	93.7332	-29.0648	19.1286	55.9229	-57.182	-66.2426	-38.1763
100.146	18.0208	-44.9497	64.0805	106.772	-22.1682	1.96659	71.5222	-57.7657	-59.7563	-29.8687
100.146	18.0625	-42.871	56.5281	114.344	-29.5277	8.05002	62.0223	-53.7424	-57.2585	-30.1928
100.146	18.1042	-35.6454	51.5288	110.446	-31.8576	14.3447	52.5707	-52.4477	-51.5772	-26.2746
100.146	18.1458	-20.5376	72.9545	100.623	-33.7277	15.395	48.9852	-48.5163	-45.5689	-28.2752
100.146	18.1875	-11.6111	67.769	85.1427	-29.4348	2.95701	75.674	-50.4384	-37.5384	-27.9778
100.146	18.2292	1.39727	49.9577	83.0341	-29.4999	10.6205	53.7205	-45.1847	-33.8149	-15.0612
100.146	18.2708	18.8572	44.9463	85.8588	-27.2587	4.94317	44.9685	-37.2401	-35.0953	-2.12574
100.146	18.3125	29.9255	52.147	80.0326	-32.5055	11.3168	59.9235	-41.0413	-29.6481	-4.82692
100.146	18.3542	49.6622	48.8281	96.6416	-35.7272	5.95391	63.7127	-41.841	-23.8454	3.56484
100.146	18.3958	54.501	57.8645	87.6016	-35.1749	7.0388	60.2034	-44.147	-14.0497	-2.24015
100.146	18.4375	77.9744	60.668	91.7528	-40.0432	13.7441	56.6473	-48.0127	-7.19461	12.0796
100.146	18.4792	76.7077	51.9399	79.888	-39.2293	11.0577	73.2066	-53.4411	1.83476	16.6476
100.146	18.5208	86.0766	29.2436	85.6405	-33.1002	5.41614	81.712	-51.3065	0.450979	23.7283
100.146	18.5625	119.955	52.0206	89.2028	-35.3373	3.14834	85.9712	-53.5558	6.75704	24.3408
100.146	18.6042	111.582	35.2653	72.3561	-31.4908	11.0851	84.9814	-56.1259	18.2385	24.2701
100.146	18.6458	118.219	39.968	89.9302	-38.687	19.866	68.4961	-50.1773	5.85066	25.6926
100.146	18.6875	115.539	34.994	102.483	-46.2271	23.2264	88.1163	-52.1253	-0.0203528	32.1634
100.146	18.7292	115.309	35.201	109.602	-47.9947	27.5764	85.1327	-53.2979	-4.96265	39.3649
100.146	18.7708	116.664	33.9634	120.649	-50.5089	21.6435	87.0976	-52.7546	-9.55786	52.2945
100.146	18.8125	107.92	49.2141	100.928	-49.5171	15.3078	94.9919	-55.2321	-9.91568	51.4996
100.146	18.8542	78.3341	49.5558	75.7507	-55.2875	40.7559	105.167	-58.0469	-12.7296	43.5161
100.146	18.8958	58.6184	36.6688	73.5213	-54.2597	21.3478	134.284	-56.8218	-9.44868	31.5523
100.146	18.9375	62.2001	40.2487	78.7189	-58.7663	41.9846	122.339	-51.1173	-22.5274	31.2713
100.146	18.9792	51.1583	41.632	79.0743	-54.5572	23.8889	134.884	-52.0957	-20.5371	18.399
100.146	19.0208	34.0048	36.2753	57.0957	-54.1403	29.8489	122.672	-54.2672	-12.8548	18.4496
100.146	19.0625	33.6799	31.9627	78.1578	-55.4029	22.528	129.149	-50.0939	-22.3459	17.1739
100.146	19.1042	34.6801	34.236	62.5708	-52.9619	31.2112	128.414	-50.9346	-22.141	14.5947
100.146	19.1458	31.6287	29.433	69.825	-56.405	30.6998	150.946	-51.2395	-24.5686	13.8655
100.146	19.1875	40.7682	33.4931	61.7542	-57.3231	38.1477	158.686	-50.1002	-31.0823	24.2943
100.146	19.2292	44.5345	36.002	55.1948	-56.0601	33.0938	168.993	-46.6834	-29.842	16.3727
100.146	19.2708	57.1789	39.8425	73.1909	-56.5943	26.5147	181.504	-43.4835	-32.1435	9.46908
100.146	19.3125	76.6458	48.3726	69.9951	-57.8144	30.8441	172.153	-34.0895	-32.4264	4.6766
100.146	19.3542	79.1607	47.7718	65.6567	-55.7683	30.4494	189.674	-34.416	-33.3396	0.159322
100.146	19.3958	96.8784	57.3776	66.3638	-56.1761	34.8949	173.969	-31.7211	-36.7544	7.51554
100.146	19.4375	87.7011	57.7891	80.6621	-54.5551	21.6715	170.235	-30.7603	-32.7112	-5.41772
100.146	19.4792	89.2661	53.3708	83.957	-52.2445	24.6553	164.339	-29.8946	-30.241	-12.8302
100.146	19.5208	95.3777	46.6631	71.6002	-45.7908	25.8996	154.099	-35.8881	-25.6252	-6.12055
100.146	19.5625	81.0011	49.8241	77.9552	-48.4794	26.668	145.094	-33.1245	-32.3157	-6.23251
100.146	19.6042	78.3546	44.9044	86.8535	-48.903	18.1411	161.672	-28.0328	-35.9043	-9.59661
100.146	19.6458	81.0476	44.6608	79.8153	-47.2646	13.3802	156.227	-22.925	-34.7747	-9.63046
100.146	19.6875	73.4467	38.5466	82.2803	-47.212	24.9923	171.216	-30.8772	-31.6734	-18.7385
100.146	19.7292	69.8851	28.8809	90.0438	-48.8895	31.6468	162.596	-32.6808	-31.9555	-14.3017
100.146	19.7708	46.3205	31.5391	56.7444	-39.1634	39.3	119.464	-30.8296	-33.5345	-17.0032
100.146	19.8125	43.5046	40.3657	48.3051	-36.3791	48.6504	90.9555	-32.1032	-33.2803	-15.735
100.146	19.8542	31.2293	32.7739	57.4193	-39.8212	60.8192	107.958	-38.6392	-38.5692	-17.2391
100.146	19.8958	26.6764	20.3391	70.9983	-38.4985	65.0071	103.207	-35.7355	-44.0378	-16.995
100.146	19.9375	24.0747	13.6546	87.7738	-38.5989	50.9222	127.021	-42.0308	-43.1321	-16.1695
100.146	19.9792	48.8128	36.73	97.2757	-41.0583	43.1288	135.259	-43.2693	-41.1208	-16.78
100.146	20.0208	52.7781	49.3262	76.7742	-31.7628	36.4727	110.891	-34.5282	-43.8563	-19.8274
100.146	20.0625	41.2161	37.5751	71.5479	-37.386	49.0889	119.575	-35.4512	-44.5758	-18.4034
100.146	20.1042	37.3335	27.4109	69.7387	-27.6554	45.4284	111.566	-37.274	-41.056	-22.8384
100.146	20.1458	8.22204	26.4523	62.1698	-31.5349	37.0754	97.0275	-38.3915	-39.8335	-23.004
100.146	20.1875	-0.729241	40.1927	62.1882	-30.462	27.9078	94.2349	-36.4915	-45.6889	-26.7328
100.146	20.2292	-7.91702	44.6985	60.6444	-33.5426	23.6991	84.3414	-39.463	-46.3591	-19.4991
100.146	20.2708	-24.8422	56.8769	50.8328	-28.3568	11.2651	70.0676	-44.0229	-46.99	-21.0422
100.146	20.3125	-39.6263	64.0771	55.3431	-39.2703	17.4319	39.6214	-51.767	-44.5564	-11.0445
100.146	20.3542	-51.2138	49.9269	72.9312	-40.9705	13.4798	27.4164	-55.0522	-52.1579	2.52088
100.146	20.3958	-58.8715	26.1246	59.0232	-33.649	0.67117	25.1373	-57.8278	-35.7415	-9.47117
100.146	20.4375	-64.3724	16.3926	28.255	-38.634	6.91173	15.2832	-51.5089	-34.8487	-0.11918
100.146	20.4792	-70.7737	14.7297	14.9473	-26.1715	-15.9806	12.006	-48.6986	-32.8586	-7.39479
100.146	6.47917	-72.0002	23.3057	-7.27083	-32.0135	-6.81716	18.0431	-50.0501	-28.7939	-7.93275
100.146	6.52083	-62.7905	-22.2769	-8.23756	34.2914	-46.3979	-5.17383	14.2681	-23.8906	-12.1145
100.146	6.5625	-69.8498	-32.0462	-2.47846	19.5089	-46.1138	-8.23894	16.8631	-21.4378	-16.1411
100.146	6.60417	-75.0777	-31.6807	-12.9386	3.34564	-36.8674	-14.6545	17.4862	-18.5636	-21.3522
100.146	6.64583	-74.9398	-38.3998	-1.93393	7.01639	-43.4633	-15.4368	14.8228	-13.1764	-18.6692
100.146	6.6875	-75.4625	-42.8485	-9.26554	19.417	-43.4468	-17.3449	7.94462	-13.0293	-9.7051
100.146	6.72917	-75.6508	-41.6539	-6.65412	21.0375	-43.2652	-24.5263	18.4226	-11.3551	-17.828
100.146	6.77083	-76.0453	-48.2895	-3.65673	13.2854	-42.3632	-26.1354	36.0293	-14.2837	-14.4966
100.146	6.8125	-77.4866	-46.6796	-7.96267	15.7185	-40.4894	-20.6599	32.2682	-16.9412	-23.572
100.146	6.85417	-76.0242	-35.7511	-16.4968	30.9243	-47.9042	-24.4579	48.6803	-20.4234	-26.6917
100.146	6.89583	-75.976	-34.9515	-15.569	21.6843	-43.5143	-31.6852	56.5995	-20.9562	-24.7407
100.146	6.9375	-78.2773	-38.1744	-10.2848	8.92363	-39.8762	-35.8895	59.6914	-18.2685	-28.5324
100.146	6.97917	-79.3926	-42.7917	-9.73879	23.7279	-52.0348	-21.1213	69.3245	-33.4527	-24.341
100.146	7.02083	-79.3449	-39.092	-12.0333	20.4712	-55.3537	-12.9005	47.9706	-26.9253	-23.8962
100.146	7.0625	-82.1468	-40.9744	-10.3076	15.8252	-51.9262	-17.4783	38.5631	-22.8251	-31.3695
100.146	7.10417	-84.1422	-39.2736	-16.3197	27.4486	-58.2214	-10.1319	51.1513	-29.3525	-38.9285
100.146	7.14583	-84.9547	-37.953	-23.7689	26.959	-53.9861	-13.5592	43.5895	-32.9253	-34.5976
100.146	7.1875	-85.766	-38.0688	-20.1025	22.6499	-53.2197	-24.0895	42.9573	-28.7243	-35.1804
100.146	7.22917	-86.3307	-36.9069	-13.8302	29.0707	-57.1536	-33.5285	44.9409	-32.6883	-29.895
100.146	7.27083	-86.3361	-37.5679	-12.8652	36.6306	-60.7031	-37.9117	31.899	-25.4539	-23.3712
100.146	7.3125	-86.4332	-35.6508	-4.40613	26.3682	-63.5612	-35.415	12.9232	-13.9592	-23.6719
100.146	7.35417	-86.4082	-25.1359	-11.0355	35.2702	-66.319	-37.5649	16.4655	-17.8219	-25.0421
100.146	7.39583	-86.725	-25.4866	-0.547335	4.95436	-63.0595	-46.3628	26.9498	-13.9839	-21.1137
100.146	7.4375	-86.6194	-23.3916	-10.0597	18.9614	-64.7288	-47.0858	22.5029	-7.54429	-22.7737
100.146	7.47917	-86.8568	-26.4735	-12.9815	11.6044	-63.6735	-42.591	31.0297	-15.9578	-19.8517
100.146	7.52083	-86.433	-34.113	-7.21186	0.149846	-56.2429	-43.1098	19.5018	-9.5242	-17.6716
100.146	7.5625	-84.5767	-32.8538	-10.2545	4.45282	-59.5176	-39.1467	14.9598	-11.8715	-1.82277
100.146	7.60417	-86.178	-35.72	-8.19913	8.0564	-59.0803	-39.6767	15.3163	-9.30069	-16.0374
100.146	7.64583	-85.764	-32.8267	-9.96645	3.21263	-59.5655	-44.4336	41.2973	-13.2858	-17.1552
100.146	7.6875	-82.9655	-17.3902	-15.2945	6.72299	-61.3976	-36.7429	28.287	-8.28599	-20.6064
100.146	7.72917	-84.3917	-26.7042	-6.10703	1.83672	-59.7659	-40.8444	25.158	-8.4181	-18.3643
100.146	7.77083	-85.4003	-27.7435	-3.48845	-3.87788	-57.9842	-39.7969	26.7331	-13.2862	-21.6473
100.146	7.8125	-82.1837	-22.0885	8.25309	-1.47765	-61.1759	-36.9617	29.1671	-8.78819	-25.6413
100.146	7.85417	-83.2142	-31.1827	22.221	-23.1324	-52.7745	-40.3296	17.8587	-2.16591	-20.0959
100.146	7.89583	-81.2477	-27.907	6.22077	-17.8869	-50.2224	-40.7672	13.8594	-5.486	-6.01103
100.146	7.9375	-80.599	-28.043	-1.79714	-6.50386	-52.9181	-37.8702	4.38428	-0.440417	-3.40333
100.146	7.97917	-80.6494	-33.9425	1.80574	2.83294	-58.2233	-34.4534	5.49946	7.55065	-9.94243
100.146	8.02083	-81.7222	-34.1069	10.6095	-6.75385	-55.4971	-38.8125	7.09649	2.49865	-10.0263
100.146	8.0625	-79.4436	-28.3486	17.0195	-12.8595	-53.571	-34.9448	1.55192	-4.33678	-4.11755
100.146	8.10417	-75.7133	-13.1435	16.9946	-15.2124	-54.9939	-30.1771	-5.88404	-2.56393	-2.18249
100.146	8.14583	-74.7783	-5.93584	19.0525	-24.7924	-52.4408	-26.1921	-8.16187	-4.89748	-2.32166
100.146	8.1875	-69.7132	-0.745103	22.4733	-22.8435	-52.4356	-31.2497	-8.53886	5.09871	2.72991
100.146	8.22917	-69.9981	-2.33481	15.3746	-8.4867	-57.0671	-22.0109	-20.9454	11.0229	-0.99668
100.146	8.27083	-71.7989	8.84318	10.1718	-23.4416	-49.4834	-35.0429	-8.35642	-4.51871	6.98444
100.146	8.3125	-71.4717	6.84716	9.10502	-19.0983	-54.969	-28.4741	-1.67351	-11.6168	8.0677
100.146	8.35417	-74.6715	1.72553	23.6908	-33.4487	-50.7316	-27.8424	4.43948	-24.3563	7.69536
100.188	13.4792	-95.1796	-44.981	-19.504	129.189	7.1511	-83.9127	-78.1353	11.9027	12.6009
100.188	13.5208	-95.5624	-50.3781	-17.8907	131.487	3.90906	-84.6777	-76.8668	18.063	8.1999
100.188	13.5625	-95.3549	-53.2759	-8.45788	131.677	0.0441864	-84.8863	-77.4639	22.9549	11.8831
100.188	13.6042	-95.6928	-58.107	-8.5376	143.523	-6.13206	-85.5071	-76.2346	28.5807	11.0405
100.188	13.6458	-95.8209	-54.1797	-14.7853	149.09	-15.0433	-85.9955	-73.3478	32.6979	2.11473
100.188	13.6875	-96.1609	-57.4286	-12.1244	171.002	-24.8048	-88.1099	-69.0773	52.5121	-10.1923
100.188	13.7292	-96.1893	-57.9601	-8.35473	168.814	-29.1295	-86.4134	-71.9257	44.2074	-5.61441
100.188	13.7708	-96.5587	-58.5932	-8.31242	142.505	-23.5841	-87.31	-69.7559	36.4763	-6.61589
100.188	13.8125	-96.938	-61.288	1.72723	148.141	-23.9576	-88.2007	-67.8984	34.0881	-18.8675
100.188	13.8542	-97.0307	-63.3459	8.29888	140.03	-27.5326	-87.1875	-66.2705	24.0406	-19.7795
100.188	13.8958	-97.0288	-57.3261	-5.96707	148.4	-17.2035	-88.5475	-63.6796	24.6357	-30.5573
100.188	13.9375	-96.5448	-52.7503	-6.6907	138.823	-16.5504	-86.2702	-64.3456	20.6153	-33.4008
100.188	13.9792	-95.5102	-39.9151	1.72218	127.929	-16.5124	-83.9388	-65.9496	2.38071	-31.0542
100.188	14.0208	-96.0333	-45.0594	3.17848	132.471	-17.2173	-82.2641	-62.9487	-14.5975	-35.2094
100.188	14.0625	-96.7287	-45.2284	13.3521	112.317	-22.0807	-79.794	-60.5059	-30.293	-42.7452
100.188	14.1042	-97.0154	-39.722	-0.00893673	118.239	-29.3868	-76.74	-58.8515	-36.7831	-46.8925
100.188	14.1458	-97.16	-32.4506	-8.85215	119.229	-30.5448	-73.2088	-59.1248	-45.0311	-49.6757
100.188	14.1875	-97.207	-34.2499	0.700613	96.435	-29.777	-68.9756	-59.5298	-47.2544	-53.8234
100.188	14.2292	-97.3092	-35.9938	-5.02402	106.914	-23.9415	-67.7702	-57.8706	-54.1538	-54.8179
100.188	14.2708	-97.4306	-39.7919	5.61993	80.3214	-22.4406	-62.6699	-55.3203	-61.1101	-55.4615
100.188	14.3125	-97.4405	-38.565	3.74554	64.4323	-25.498	-56.3095	-52.2084	-63.9433	-56.4605
100.188	14.3542	-97.5082	-32.3333	2.81409	46.708	-25.9911	-51.6445	-46.8876	-67.4546	-60.5341
100.188	14.3958	-97.52	-29.0207	-8.20292	50.7924	-19.3607	-44.4197	-44.4655	-71.1456	-64.8541
100.188	14.4375	-97.3202	-26.8676	-12.7499	51.3631	-16.5063	-33.3261	-44.2966	-75.7758	-63.0627
100.188	14.4792	-97.3932	-25.3769	-12.1544	50.6385	-12.5182	-42.159	-40.5075	-74.3455	-65.8176
100.188	14.5208	-97.5793	-29.142	-1.25077	41.1477	-15.7939	-39.1793	-34.3858	-75.4637	-70.2739
100.188	14.5625	-97.7061	-27.8048	-6.60617	51.1689	-14.7785	-37.9544	-26.6053	-79.2894	-71.9991
100.188	14.6042	-97.7576	-18.9094	-15.8305	63.9438	-11.3285	-32.8122	-25.8167	-83.0483	-73.2517
100.188	14.6458	-97.6684	-18.9784	-16.0087	66.2013	-11.9155	-27.5463	-24.4459	-83.0856	-74.7242
100.188	14.6875	-97.7429	-20.5383	-17.7086	70.235	-7.42725	-35.5301	-36.2915	-80.7289	-72.3271
100.188	14.7292	-97.7151	-16.0458	-14.1606	53.0629	-7.57871	-42.233	-39.2949	-79.0428	-69.5031
100.188	14.7708	-97.8965	-16.6627	-19.5188	56.7814	0.943296	-48.1084	-50.4604	-77.4404	-65.8295
100.188	14.8125	-97.9158	-20.9147	-20.7866	62.0064	-2.44469	-49.3791	-56.5138	-77.455	-57.5843
100.188	14.8542	-98.0571	-29.4972	-17.7559	64.6279	1.8734	-53.5532	-58.3838	-77.4258	-54.2117
100.188	14.8958	-98.2403	-29.8425	-9.13146	68.1768	-3.41729	-58.0225	-61.9208	-76.3725	-55.0064
100.188	14.9375	-98.4268	-27.8619	-12.0822	89.6962	-10.6501	-60.4382	-63.6331	-76.6018	-56.5254
100.188	14.9792	-98.3351	-28.3545	-18.4481	103.305	-12.1303	-60.6948	-62.499	-77.1675	-52.6065
100.188	15.0208	-98.0177	-23.1247	-13.7129	106.823	-15.3731	-63.1388	-60.8893	-74.2702	-53.9722
100.188	15.0625	-97.5982	-17.0541	-6.30803	104.703	-10.1975	-65.8915	-57.3429	-74.1652	-55.2723
100.188	15.1042	-97.3372	-26.2864	4.60483	114.168	-9.54533	-65.9668	-57.9536	-73.4676	-53.0488
100.188	15.1458	-97.0097	-28.4854	4.1657	129.88	-15.5926	-65.8502	-52.4455	-73.9179	-51.1588
100.188	15.1875	-94.3879	-23.4913	2.92851	151.579	-12.8071	-64.7434	-40.6177	-68.8068	-50.2535
100.188	15.2292	-89.2064	-26.0634	23.952	161.805	-14.2617	-59.4137	-38.0388	-58.0803	-50.2279
100.188	15.2708	-79.2162	-24.3406	19.4297	209.071	-8.79514	-60.5794	-23.7116	-45.1114	-50.5677
100.188	15.3125	-66.4964	-28.1174	17.5201	223.763	-16.2563	-59.3468	4.38394	-38.8909	-43.5921
100.188	15.3542	-37.4216	-15.0604	20.0314	205.452	-6.3302	-53.0726	5.28221	-29.4091	-38.4899
100.188	15.3958	11.6538	-15.4139	16.3152	238.089	-4.98591	-52.5652	22.7133	-18.6872	-25.3602
100.188	15.4375	53.1381	-9.88773	20.7459	235.8	-6.22419	-49.505	26.4765	-14.2967	-18.3418
100.188	15.4792	52.0456	-23.9663	25.8356	224.769	-2.0585	-49.4602	42.2086	-8.3749	-24.1336
100.188	15.5208	64.9184	-28.0196	19.346	226.129	5.43247	-51.2293	36.4758	4.93946	-20.0662
100.188	15.5625	49.138	-33.0026	10.6703	216.448	-5.5593	-42.1158	31.3438	-5.55073	-6.27186
100.188	15.6042	4.59615	-39.6845	3.68748	184.199	-1.61254	-44.6281	40.6458	-10.7138	-13.9804
100.188	15.6458	-16.1305	-36.5877	-16.3519	168.821	-3.14097	-40.3747	31.5641	-5.93273	-17.7068
100.188	15.6875	-41.1164	-36.7937	-22.9809	133.404	-2.9109	-33.9752	20.8174	-16.6186	-19.749
100.188	15.7292	-53.5005	-35.6901	-30.8966	111.93	-6.58795	-34.3395	15.4958	-23.3263	-9.10105
100.188	15.7708	-66.209	-39.853	-31.7587	70.9157	-2.17715	-29.0616	-2.6229	-19.0916	-11.8982
100.188	15.8125	-75.4975	-39.432	-33.9155	48.8454	-9.71198	-28.1716	-3.40672	-19.5732	-18.3684
100.188	15.8542	-79.6614	-33.8102	-33.1032	29.5999	-10.4154	-25.9577	-8.80723	-31.6754	-14.2431
100.188	15.8958	-82.2617	-30.9233	-39.3787	16.0534	-4.49471	-21.8414	-14.4237	-36.1997	-10.4396
100.188	15.9375	-84.8255	-29.7066	-39.8382	12.0481	-12.2785	-8.31339	-25.8683	-37.539	-14.0095
100.188	15.9792	-86.353	-30.6854	-39.2696	-2.92728	-10.7103	5.89866	-28.3708	-39.208	-18.8891
100.188	16.0208	-89.3073	-32.3562	-42.7193	-18.6208	-5.03717	16.6469	-36.362	-39.2043	-20.8732
100.188	16.0625	-89.7783	-31.0759	-43.8239	-25.6038	-6.5906	31.5207	-44.7857	-39.2135	-13.9389
100.188	16.1042	-90.4037	-34.5917	-43.6577	-37.1006	-3.66503	62.0491	-49.9404	-40.5421	-10.9035
100.188	16.1458	-88.5038	-47.9146	-37.985	-31.6869	8.19927	80.7387	-43.2615	-44.3857	-15.5697
100.188	16.1875	-78.4895	-53.6549	-22.303	-20.5272	17.9561	113.033	-47.0989	-36.0822	-11.5357
100.188	16.2292	-47.9436	-50.9167	1.65415	-9.929	42.3099	146.181	-49.861	-33.8283	-0.34641
100.188	16.2708	35.6087	-40.4003	31.3521	3.68601	59.2947	205.617	-48.7544	-30.5323	-3.60218
100.188	16.3125	56.9845	-37.2152	43.3163	-2.7511	65.5483	232.057	-50.618	-34.9748	1.63292
100.188	16.3542	-12.3959	-42.0069	29.1292	-21.2049	54.2486	202.61	-53.4864	-35.775	6.47205
100.188	16.3958	-49.2647	-42.9552	6.59353	-36.5174	39.0745	214.141	-55.8336	-35.6264	5.81246
100.188	16.4375	-67.2872	-43.8377	-10.7925	-44.5972	17.5032	204.266	-55.7046	-34.1995	13.0966
100.188	16.4792	-78.3761	-43.034	-23.4554	-51.92	15.6884	176.483	-54.8665	-39.8065	18.6951
100.188	16.5208	-86.1446	-43.6837	-23.522	-58.7977	-0.736829	156.737	-55.607	-41.6277	18.2302
100.188	16.5625	-86.8926	-38.8705	-16.8026	-57.0856	-3.67323	154.148	-55.8896	-44.2164	-0.304983
100.188	16.6042	-84.7167	-34.0596	-5.22716	-52.6358	0.847548	141.932	-57.0785	-47.6276	-5.85492
100.188	16.6458	-82.8769	-26.1799	9.25924	-48.6707	8.28706	121.781	-56.2649	-54.9611	-12.5692
100.188	16.6875	-76.8185	-15.349	21.0357	-42.7474	27.6859	96.1068	-57.6371	-56.0292	-15.2745
100.188	16.7292	-65.3038	-3.02649	39.9292	-37.1008	33.4182	99.8196	-60.6841	-55.156	-13.5133
100.188	16.7708	-56.4206	16.356	75.5161	-35.8439	28.4863	105.419	-58.6728	-59.4662	-24.7708
100.188	16.8125	-61.8118	25.4778	93.4475	-32.538	10.6421	88.8946	-59.3454	-63.5897	-24.6183
100.188	16.8542	-77.7952	28.3292	68.2375	-30.2043	3.8582	68.5291	-65.579	-64.1772	-31.7236
100.188	16.8958	-87.7853	23.6135	68.0897	-35.9335	-2.05792	54.1614	-66.626	-71.7235	-35.6025
100.188	16.9375	-93.7476	12.5889	39.7837	-40.4825	0.0607048	40.0918	-68.7325	-75.1219	-38.7844
100.188	16.9792	-96.3411	5.00105	16.5559	-38.5213	-9.88119	26.8422	-67.7897	-77.7899	-40.533
100.188	17.0208	-96.9793	2.4075	20.2157	-36.0289	-18.8594	22.9184	-69.9347	-77.7611	-42.4833
100.188	17.0625	-97.1587	4.67914	34.6526	-37.6052	-17.3253	19.3461	-72.4675	-79.1509	-42.9593
100.188	17.1042	-96.9501	18.3772	49.7197	-40.8558	-17.3771	24.3853	-72.9606	-80.7481	-45.6145
100.188	17.1458	-96.3396	31.4555	57.8939	-42.5741	-11.7387	22.5258	-72.801	-81.5354	-43.4557
100.188	17.1875	-96.279	41.7915	70.3084	-41.2805	-8.89801	22.7614	-75.488	-81.3943	-48.5516
100.188	17.2292	-95.3815	63.3923	99.883	-38.8684	-2.83472	20.3407	-77.6505	-80.2422	-55.1978
100.188	17.2708	-92.8984	91.4895	109.081	-25.0349	-1.94102	17.941	-76.1692	-82.033	-52.2171
100.188	17.3125	-90.6961	96.9308	160.037	-20.8307	-0.023228	34.1406	-76.3825	-84.1711	-54.2263
100.188	17.3542	-87.1463	105.395	216.76	-18.8364	19.1859	32.075	-77.4966	-83.7551	-57.7006
100.188	17.3958	-88.4784	100.657	188.541	-15.9592	18.9714	44.1321	-77.4543	-85.5432	-57.6336
100.188	17.4375	-88.2508	87.2301	199.007	-19.0417	27.7127	40.5106	-75.7562	-85.7744	-58.1133
100.188	17.4792	-86.8846	92.7652	215.809	-18.8958	18.7405	56.171	-76.2529	-85.7869	-57.5591
100.188	17.5208	-84.1513	101.411	215.892	-13.2813	18.402	40.7049	-72.6233	-85.3418	-57.0337
100.188	17.5625	-81.3353	85.7754	216.172	-18.5292	33.7021	47.577	-70.6206	-82.6963	-61.1161
100.188	17.6042	-76.4666	84.1413	235.805	-26.8626	25.6906	69.5812	-71.3299	-79.8469	-57.7473
100.188	17.6458	-74.4952	90.1029	171.227	-26.9882	28.5198	64.8834	-66.6968	-79.8589	-52.3361
100.188	17.6875	-74.5162	110.338	144.23	-18.7796	14.5997	61.8118	-69.069	-77.1082	-53.4824
100.188	17.7292	-79.4144	91.6476	154.349	-13.2372	7.44013	63.4654	-72.7109	-79.012	-51.6115
100.188	17.7708	-80.0978	87.7253	121.907	-13.9735	13.8738	49.5817	-73.5082	-74.1	-52.4816
100.188	17.8125	-76.2328	88.3112	122.124	-21.7931	11.9239	70.738	-72.074	-70.4594	-53.9127
100.188	17.8542	-73.8101	83.6894	92.0502	-28.1095	19.7025	73.7427	-65.6048	-70.6983	-50.7321
100.188	17.8958	-67.9113	86.5322	95.3812	-31.8724	14.9305	58.9389	-58.7715	-69.503	-43.7305
100.188	17.9375	-64.1382	74.1184	112.083	-37.8474	27.2769	63.0074	-60.3837	-65.047	-45.6114
100.188	17.9792	-49.1197	67.9347	109.325	-32.2755	19.4931	58.6111	-61.0315	-58.4327	-30.3852
100.188	18.0208	-50.6022	55.0301	108.569	-33.5837	23.3474	50.8131	-56.0973	-58.9566	-31.3779
100.188	18.0625	-39.5085	54.3116	125.474	-33.8829	19.2528	50.7201	-52.7186	-54.0856	-32.6084
100.188	18.1042	-20.2138	74.3486	99.7794	-30.5831	10.7691	57.5671	-45.8772	-52.2318	-26.8709
100.188	18.1458	-14.9537	50.4911	105.619	-29.3076	5.16725	71.3901	-47.3728	-49.1907	-19.3346
100.188	18.1875	-3.77585	51.0092	74.9041	-22.8435	4.16005	71.048	-47.6467	-40.5966	-14.7817
100.188	18.2292	10.5485	50.8911	80.991	-24.8963	-0.775975	65.5109	-43.515	-33.9507	-12.0317
100.188	18.2708	25.5309	61.1546	86.5818	-30.9884	7.84744	52.3989	-40.2241	-29.5054	-12.6541
100.188	18.3125	50.6321	64.8461	84.4167	-32.7848	11.122	52.3957	-42.3022	-26.762	3.01534
100.188	18.3542	57.776	54.5236	103.472	-41.8263	17.6981	57.7816	-46.1396	-15.0618	1.53524
100.188	18.3958	61.404	51.7471	95.3449	-45.058	18.0132	64.5487	-45.4906	-9.41982	3.36132
100.188	18.4375	74.1051	38.6759	94.3856	-37.5136	15.5568	58.1239	-46.1639	-6.86145	12.8145
100.188	18.4792	87.5054	25.7094	93.7468	-34.7602	17.3729	62.9849	-51.3732	-2.4306	30.0153
100.188	18.5208	92.7254	31.8991	78.68	-29.4374	10.4557	71.1997	-52.316	2.43067	25.4738
100.188	18.5625	85.266	36.636	68.2012	-27.6646	6.10858	77.2617	-52.1052	-4.66799	29.7651
100.188	18.6042	103.612	25.3974	112.757	-41.4661	15.711	81.6296	-53.9031	-8.75386	47.4946
100.188	18.6458	122.535	44.3376	102.086	-42.5274	30.565	79.8638	-56.1156	-7.61359	39.423
100.188	18.6875	125.796	31.1956	123.801	-43.9338	30.5079	72.73	-54.1514	-10.6133	48.4673
100.188	18.7292	115.096	33.1007	119.009	-45.0293	20.2921	89.2956	-54.7415	-1.57132	32.3305
100.188	18.7708	77.5067	22.2527	113.102	-45.3844	20.826	95.7179	-53.6447	-14.8175	33.6013
100.188	18.8125	72.5724	34.9517	89.7818	-52.7865	29.9408	114.242	-56.2416	-11.7329	32.7272
100.188	18.8542	64.8648	44.1665	89.2189	-56.5288	37.173	106.476	-52.6371	-16.7429	24.4797
100.188	18.8958	78.2715	45.1421	85.415	-53.2054	29.3075	108.527	-50.7022	-17.5271	29.1287
100.188	18.9375	73.1911	52.9156	83.5257	-51.6859	32.5609	97.7815	-46.7159	-25.9721	23.5121
100.188	18.9792	58.2287	55.5314	60.8184	-53.6044	33.283	108.899	-51.3451	-11.3587	13.5481
100.188	19.0208	58.1043	39.694	72.9231	-54.1791	23.6504	146.869	-54.4228	-7.53696	11.0378
100.188	19.0625	56.2055	32.0481	83.3955	-53.8936	36.3106	137.317	-49.9673	-19.8451	7.8382
100.188	19.1042	57.4276	32.8502	61.3442	-50.8863	32.9448	141.212	-49.7926	-21.8688	18.8777
100.188	19.1458	59.8125	49.7223	58.6353	-53.9508	40.8889	145.494	-46.3374	-30.6445	13.5094
100.188	19.1875	72.9883	46.8848	69.5767	-56.3793	40.6926	156.319	-43.3616	-30.4767	12.1212
100.188	19.2292	97.8141	47.0153	88.9393	-54.9706	29.383	164.628	-38.4207	-31.6178	9.69489
100.188	19.2708	87.3957	46.6105	78.5648	-56.7279	41.2141	163.22	-37.724	-34.5407	9.16957
100.188	19.3125	82.8401	43.8802	71.7483	-54.0824	22.7106	179.617	-33.1256	-29.5582	-0.307639
100.188	19.3542	88.754	40.2799	64.3971	-53.6013	24.9973	186.06	-30.3763	-35.8585	10.4704
100.188	19.3958	84.0093	39.9035	87.6723	-56.3177	29.9785	171.087	-30.8826	-29.244	-6.89476
100.188	19.4375	99.1605	43.458	89.9544	-51.5779	15.0113	209.371	-32.9761	-23.757	-16.989
100.188	19.4792	101.227	46.58	87.4467	-50.5812	20.8515	179.023	-34.694	-24.1897	-11.2296
100.188	19.5208	102.246	53.6084	86.0513	-50.1219	24.3828	149.268	-27.4265	-32.0468	-7.20898
100.188	19.5625	83.9245	42.5196	89.0461	-52.1377	27.3625	165.485	-28.2675	-31.3497	-14.3429
100.188	19.6042	85.3537	36.4283	93.2152	-52.8792	35.0354	146.57	-27.6117	-26.4946	-15.7697
100.188	19.6458	89.8639	39.7787	96.2443	-48.7135	38.8235	133.642	-31.0505	-31.6648	-11.6895
100.188	19.6875	64.5307	33.2407	108.088	-55.1768	36.4616	177.287	-36.309	-36.2938	-13.7696
100.188	19.7292	54.0083	35.9515	77.6847	-48.4801	51.965	130.356	-37.103	-40.3634	-5.75689
100.188	19.7708	42.3486	35.2473	51.6874	-39.0668	58.715	98.0644	-36.859	-42.8171	0.327383
100.188	19.8125	39.4609	27.1628	51.5668	-37.6897	74.4321	100.796	-44.2281	-40.3483	-0.343074
100.188	19.8542	25.7451	41.756	46.3558	-28.5714	55.5046	91.0758	-40.8856	-43.5516	-14.4198
100.188	19.8958	14.9103	23.886	95.6277	-40.1532	41.1131	103.938	-47.1676	-34.1942	-20.8163
100.188	19.9375	19.1285	24.9051	101.719	-39.046	30.4275	116.813	-43.8215	-39.9185	-18.7317
100.188	19.9792	25.2021	46.196	85.1982	-41.3673	33.5597	109.593	-38.0016	-41.5824	-22.2102
100.188	20.0208	24.6149	55.4602	62.3672	-39.1644	38.034	105.354	-37.9007	-37.6968	-26.0038
100.188	20.0625	16.2347	51.8333	61.9916	-38.6959	51.8138	81.9599	-40.0916	-42.0193	-19.6608
100.188	20.1042	-1.2657	40.7608	63.2826	-34.8122	31.6869	81.2058	-40.9557	-43.1262	-17.7616
100.188	20.1458	-20.0931	39.6808	64.5311	-35.4938	16.6368	83.9707	-43.2577	-43.6424	-21.4485
100.188	20.1875	-27.577	52.0065	58.6967	-34.5243	6.07797	64.6601	-40.3399	-46.9402	-17.0715
100.188	20.2292	-38.5326	58.2524	49.6228	-30.0242	-2.15946	54.1834	-46.4013	-53.1366	-2.0951
100.188	20.2708	-56.8	39.5804	63.0949	-33.1545	-5.87685	29.6987	-49.6842	-47.161	-12.5308
100.188	20.3125	-61.9332	41.2007	57.5085	-35.1218	-2.77749	10.1284	-54.8311	-43.7042	-3.09969
100.188	20.3542	-68.2478	23.8226	52.5279	-31.8612	-7.2163	5.61498	-52.991	-43.8136	-4.67182
100.188	20.3958	-72.1034	22.3387	37.6082	-32.3792	-10.485	1.0826	-54.7045	-32.6286	-11.2517
100.188	20.4375	-73.2411	18.2537	12.0705	-29.9417	-14.8543	-4.57376	-50.9347	-26.5019	-1.63927
100.188	20.4792	-76.1289	20.0861	-0.0677675	-31.0083	-14.2774	-10.9769	-45.7038	-27.9058	-3.48157
100.188	20.5208	-78.2437	4.85524	-2.89145	-23.6509	-20.5989	-11.8916	-45.4895	-17.532	-11.0135
100.188	20.5625	-78.2505	-8.39259	9.59888	-28.3116	-26.6987	5.87036	-45.0856	-26.3444	-3.73108
100.188	20.6042	-74.4323	4.20461	5.72531	-38.0738	-5.60846	-1.96717	-47.0279	-21.2808	-2.87769
100.188	6.72917	-72.761	-45.9856	-13.6628	21.7795	-40.9775	-17.7282	51.5825	-16.6878	-21.7862
100.188	6.77083	-72.9137	-45.7085	-14.2591	21.1763	-39.1474	-23.0966	61.3208	-10.2312	-29.1448
100.188	6.8125	-72.0623	-46.3434	-8.69859	19.0006	-39.8347	-17.5083	63.7711	-23.0269	-23.4036
100.188	6.85417	-72.678	-45.8949	-11.3819	23.9379	-39.6276	-25.7004	63.8457	-18.3881	-23.3461
100.188	6.89583	-72.6808	-39.6857	-7.39461	9.78278	-35.6342	-31.2611	69.685	-18.9189	-26.8093
100.188	6.9375	-77.4886	-38.9218	-12.9175	12.7934	-39.9442	-25.8425	63.7308	-30.9294	-25.4978
100.188	6.97917	-79.2816	-44.7323	-6.28618	20.6654	-48.7003	-12.5214	41.0872	-21.4287	-33.3607
100.188	7.02083	-80.8627	-46.8716	-6.06137	17.3432	-48.7027	-6.87144	43.5342	-28.6898	-33.1706
100.188	7.0625	-81.406	-45.2637	-10.3648	15.8777	-45.9188	-11.3217	38.8918	-25.7561	-33.867
100.188	7.10417	-83.9469	-45.7645	-9.25395	23.7764	-47.5117	-12.7131	35.5458	-31.0343	-38.4711
100.188	7.14583	-84.5655	-40.7232	-11.6238	28.745	-49.7036	-26.855	36.2037	-28.6712	-35.9726
100.188	7.1875	-85.9514	-37.5372	-19.1387	41.7432	-55.7621	-33.0814	34.3676	-28.9214	-30.5944
100.188	7.22917	-86.7896	-36.6055	-21.237	39.6709	-57.6667	-35.8357	22.3844	-24.9616	-24.0631
100.188	7.27083	-86.131	-31.8995	-13.9013	29.42	-58.6695	-37.7511	21.374	-24.9552	-22.0081
100.188	7.3125	-87.5358	-29.4229	-10.1176	16.3219	-61.4458	-38.2165	16.792	-22.93	-21.2189
100.188	7.35417	-87.5416	-31.71	-8.52505	12.7772	-63.1446	-40.72	26.3842	-13.1157	-26.2881
100.188	7.39583	-87.4521	-31.1334	-11.9617	28.4547	-65.7112	-39.1167	34.4181	-16.6262	-31.1344
100.188	7.4375	-86.3414	-32.2868	-4.76349	16.2462	-65.1096	-34.7688	31.1104	-22.5893	-21.1227
100.188	7.47917	-85.3737	-32.3305	-3.22907	9.17274	-63.5798	-34.4031	25.2979	-21.7058	-12.7063
100.188	7.52083	-84.2384	-33.9335	-9.60812	13.1109	-55.5569	-38.0502	10.1612	-6.51745	-17.7032
100.188	7.5625	-84.5348	-35.416	-13.5045	14.3903	-57.5513	-33.9794	9.09361	-1.47751	-19.6531
100.188	7.72917	-81.0367	-36.0804	1.46635	5.3098	-59.1248	-33.3373	40.8299	-15.9321	-13.9359
100.188	7.77083	-79.3842	-22.3955	-5.40031	1.60785	-56.4297	-35.0873	24.8882	-9.83794	-13.2179
100.188	7.8125	-82.0577	-30.5166	15.7689	-21.9603	-47.5755	-40.1225	22.0045	-11.7827	-15.4016
100.188	7.85417	-80.7935	-25.3979	17.0334	-18.3646	-51.8796	-31.443	1.56212	-5.72055	-14.694
100.188	7.89583	-77.2432	-14.0224	1.37738	-12.5648	-52.7699	-31.8025	9.1049	-10.4837	-5.07838
100.188	7.9375	-77.1798	-17.3904	1.13868	-10.2066	-54.0755	-36.1441	13.7169	-4.55492	-4.43422
100.188	7.97917	-77.8552	-21.1656	0.887509	-0.0352296	-57.6291	-29.3851	4.74753	-0.636759	-10.5588
100.188	8.02083	-77.7102	-18.5167	8.96015	-8.94228	-60.1839	-21.8076	-4.98017	-0.771471	-6.0754
100.188	8.0625	-76.4316	-15.2116	6.29256	-12.0825	-55.0186	-17.469	-16.8218	-1.89034	-1.81545
100.188	8.10417	-77.2529	-17.9057	10.8435	-11.1099	-52.1774	-31.1422	4.37474	-8.86855	-10.216
100.188	8.14583	-73.8304	4.81955	-0.0830757	-12.0828	-50.7596	-31.3975	-8.33218	10.5299	-16.9607
100.188	8.1875	-69.7025	11.6392	-2.26987	-14.0183	-47.4025	-30.7405	-15.5345	7.72306	-2.56315
100.188	8.22917	-66.1899	12.2896	12.3688	-15.9676	-48.886	-32.0052	-6.71287	-16.5631	17.8742
100.188	8.27083	-69.7649	-0.0379277	13.6346	-21.2854	-51.4283	-22.856	-6.45627	-10.7373	8.07851
100.188	8.3125	-72.6977	-2.54548	26.7584	-21.6815	-49.6913	-25.3696	-2.25533	-21.2395	-2.36701
100.188	8.35417	-73.0408	-2.55404	21.3397	-25.8999	-52.8132	-17.9181	-7.82954	-18.13	5.27772
100.188	8.39583	-69.8401	-3.18164	28.0534	-25.0843	-50.251	-21.7051	-18.5451	-19.7961	27.6078
100.188	8.4375	-72.719	-0.981433	8.85028	-16.8185	-43.0282	-30.265	-18	-21.1759	18.4959
100.188	8.47917	-70.3529	1.5856	15.5766	-20.5529	-40.3159	-30.7704	-19.441	-14.6925	11.9307
100.229	13.4792	-95.3566	-48.9308	-24.841	155.627	6.8098	-82.975	-78.4719	13.3661	6.63495
100.229	13.5208	-95.5842	-54.3236	-15.5086	158.356	-1.1383	-85.229	-77.7194	18.1094	15.2495
100.229	13.5625	-95.979	-59.8904	-5.68865	156.508	-2.06025	-84.4271	-78.5894	25.9412	0.760793
100.229	13.6042	-95.8951	-58.623	-11.4271	178.404	-6.16988	-85.938	-77.1238	34.2334	-0.702624
100.229	13.6458	-96.105	-59.8107	-10.5732	173.048	-9.27591	-86.9969	-74.7383	37.414	-3.07802
100.229	13.6875	-96.1487	-59.361	-15.3527	192.145	-16.4294	-87.8467	-72.8754	47.1859	-5.49076
100.229	13.7292	-96.5271	-62.5645	-12.7179	198.29	-25.9543	-89.2536	-68.775	54.6503	-7.26738
100.229	13.7708	-97.0075	-63.4708	-15.8062	193.616	-27.218	-89.1722	-66.3742	49.7466	-16.4899
100.229	13.8125	-97.0302	-63.0848	-11.0201	188.497	-28.7694	-89.3776	-64.8659	38.5797	-14.9306
100.229	13.8542	-97.3209	-63.0387	-15.0412	190.569	-27.7342	-89.4293	-64.3857	43.0577	-24.5587
100.229	13.8958	-97.1228	-59.1592	-1.35206	141.983	-27.1614	-87.9472	-60.8128	22.0149	-29.6927
100.229	13.9375	-96.7672	-52.7584	-2.12023	144.473	-24.9045	-85.1879	-64.3766	12.7958	-36.0152
100.229	13.9792	-95.9903	-51.3561	7.41348	152.866	-17.771	-83.7311	-63.2698	-6.21333	-34.1455
100.229	14.0208	-96.5546	-47.3793	5.09043	153.85	-25.6892	-82.7759	-63.7184	-18.4673	-35.1768
100.229	14.0625	-97.1769	-44.0088	-2.18132	142.186	-30.6953	-81.2846	-65.3602	-16.2434	-43.4439
100.229	14.1042	-97.2842	-41.641	8.30496	120.295	-35.9141	-77.1043	-63.0401	-35.2869	-44.4232
100.229	14.1458	-97.4308	-36.2435	-3.93704	111.825	-31.2594	-73.8335	-64.9307	-43.5995	-44.3357
100.229	14.1875	-97.3777	-39.5587	4.38565	101.289	-23.2771	-72.7462	-65.8619	-47.0275	-45.3931
100.229	14.2292	-97.2827	-37.9826	-5.94919	96.7331	-14.0714	-73.9178	-55.1723	-55.8733	-46.5855
100.229	14.2708	-97.5725	-38.827	-5.72737	114.253	-33.376	-65.1746	-59.2093	-55.1625	-53.7027
100.229	14.3125	-97.4384	-32.6009	-6.2261	71.2627	-22.3776	-61.7125	-56.219	-59.2659	-55.3492
100.229	14.3542	-97.7471	-35.6181	-5.73597	56.4561	-18.2427	-53.387	-57.2203	-65.1505	-58.2396
100.229	14.3958	-97.7244	-33.5506	-10.5161	55.6066	-14.2139	-48.2124	-51.9282	-70.3402	-61.1737
100.229	14.4375	-97.7314	-27.3354	-15.3472	44.9863	-1.0197	-49.2721	-45.7625	-74.8862	-62.8072
100.229	14.4792	-97.576	-24.2089	-10.9604	52.6078	-14.6965	-41.7464	-48.8633	-74.5255	-63.6398
100.229	14.5208	-97.6835	-28.3723	-9.75361	56.9075	-19.8188	-37.2299	-39.1213	-77.566	-66.7734
100.229	14.5625	-97.7946	-24.2767	-10.5946	57.2791	-19.7873	-32.2168	-36.0233	-79.83	-70.4789
100.229	14.6042	-97.357	-21.8612	-12.386	63.5301	-15.9479	-28.3764	-26.5533	-82.3713	-69.7129
100.229	14.6458	-97.5652	-25.3156	-11.1727	66.6856	-9.88912	-29.9032	-28.3553	-81.4394	-73.7861
100.229	14.6875	-97.4781	-20.4076	-13.5245	64.2603	-10.3453	-35.7362	-37.7666	-79.1393	-70.178
100.229	14.7292	-97.5483	-20.4459	-10.9076	67.2558	-9.70558	-41.3184	-50.1856	-76.622	-66.4842
100.229	14.7708	-97.6207	-19.2237	-11.7446	59.4193	-5.92205	-48.5669	-53.0988	-75.2925	-62.6626
100.229	14.8125	-97.8925	-24.037	-15.6686	58.4463	-2.52781	-54.2586	-58.3653	-74.2964	-56.484
100.229	14.8542	-97.7457	-25.6883	-18.8178	66.537	-0.570326	-56.6067	-62.1397	-73.7137	-47.7449
100.229	14.8958	-98.0021	-24.9888	-10.8523	61.176	-9.35001	-57.2038	-64.0868	-73.7425	-49.3297
100.229	14.9375	-98.1867	-30.8218	-12.258	100.757	-18.8594	-60.6264	-66.8958	-74.0642	-45.7518
100.229	14.9792	-98.2547	-34.0539	-10.4767	111.207	-11.1662	-66.2595	-64.471	-75.4438	-46.4758
100.229	15.0208	-97.9416	-28.0021	-6.84377	116.379	-19.8076	-63.8703	-64.6661	-73.7471	-47.2273
100.229	15.0625	-97.8914	-24.9217	-0.653584	106.073	-11.7871	-65.3493	-63.7564	-73.9009	-52.5535
100.229	15.1042	-97.4108	-19.9186	4.46917	122.828	-18.7758	-66.5225	-57.3981	-71.8156	-57.4595
100.229	15.1458	-96.7138	-34.9308	13.3863	167.425	-23.3947	-68.6714	-46.8309	-72.9241	-51.7931
100.229	15.1875	-94.7792	-23.619	11.4143	152.254	-10.0827	-65.6086	-52.5541	-66.0797	-51.1319
100.229	15.2292	-90.5871	-24.7814	9.88928	205.04	-9.28496	-64.1936	-42.3111	-61.3547	-48.4468
100.229	15.2708	-82.6249	-28.0012	20.7035	230.555	-5.40328	-62.3447	-24.7772	-55.2403	-49.5687
100.229	15.3125	-71.5144	-33.7306	25.4378	258.991	-7.18853	-60.4001	-15.6588	-45.8423	-43.1403
100.229	15.3542	-49.1561	-20.6735	24.8	227.687	-6.33097	-56.2943	-5.53774	-38.5641	-34.032
100.229	15.3958	-12.2151	-11.1055	13.1149	241.193	-0.411711	-57.5188	16.4592	-30.8982	-24.8451
100.229	15.4375	14.5671	-19.0526	17.7083	230.558	-4.13377	-50.0697	12.9724	-16.1902	-19.7389
100.229	15.4792	26.2323	-20.6247	17.8059	243.605	-8.26339	-50.5412	22.2691	0.83319	-29.7653
100.229	15.5208	32.643	-28.5195	10.084	229.582	-0.820653	-46.7867	40.0207	-3.15193	-28.5364
100.229	15.5625	9.13041	-35.5726	8.37333	205.018	-6.13666	-41.4171	20.6549	-5.51219	-18.2592
100.229	15.6042	-10.0512	-38.8209	4.86812	175.724	-9.37666	-39.5219	22.391	-13.6978	-12.1655
100.229	15.6458	-25.7311	-35.9551	-12.5674	150.505	-6.9716	-37.1179	25.333	-17.1932	-12.7915
100.229	15.6875	-50.0044	-41.5938	-20.6059	138.567	-3.53264	-36.996	25.5721	-22.9151	-23.1821
100.229	15.7292	-64.8227	-35.6325	-30.4178	96.8966	-4.20157	-31.6061	2.20571	-26.0277	-19.4735
100.229	15.7708	-72.1766	-36.8308	-33.2799	70.1682	-3.38155	-28.6035	-9.22915	-24.0266	-18.4498
100.229	15.8125	-81.5307	-37.0316	-33.9083	48.1308	-9.54095	-24.0236	-11.3373	-33.0898	-26.5195
100.229	15.8542	-86.047	-39.7867	-34.6703	27.7281	-10.8644	-26.2293	-15.6572	-35.1413	-22.7981
100.229	15.8958	-87.1079	-35.2657	-40.2689	12.3853	-16.5435	-6.69589	-28.6103	-38.0777	-13.8145
100.229	15.9375	-89.9844	-34.2548	-41.1705	0.84261	-14.4638	-8.26652	-27.1847	-37.977	-27.5364
100.229	15.9792	-89.2914	-27.4704	-39.8997	-11.3319	-10.7912	5.44386	-29.7391	-44.6232	-24.299
100.229	16.0208	-89.602	-28.4341	-38.3754	-25.6361	-4.62298	24.9799	-42.7922	-45.1442	-15.2449
100.229	16.0625	-90.4455	-25.7857	-44.8549	-24.9673	-9.0471	33.9993	-47.845	-37.6427	-21.5015
100.229	16.1042	-90.3373	-30.4986	-43.1338	-37.6316	5.0725	45.687	-49.6075	-37.8359	-18.2533
100.229	16.1458	-90.188	-39.1169	-40.412	-38.7092	2.37585	65.2515	-48.8613	-36.8517	-19.2297
100.229	16.1875	-84.6592	-49.3066	-33.1129	-31.8886	11.8404	105.875	-50.9151	-35.7065	-8.5851
100.229	16.2292	-67.8206	-51.9721	-13.4211	-20.269	24.6111	134.013	-49.451	-38.1757	6.50676
100.229	16.2708	-21.7577	-46.6626	17.7478	-9.40013	48.2522	176.014	-49.3785	-36.663	4.81035
100.229	16.3125	-35.5713	-45.5334	17.0272	-22.6852	43.2	189.283	-49.0843	-38.5681	0.899223
100.229	16.3542	-58.804	-46.8115	-4.48941	-34.2664	33.586	205.61	-54.7201	-38.8814	9.19203
100.229	16.3958	-74.9094	-47.7448	-17.151	-43.4497	19.519	187.916	-58.4788	-31.1846	4.23225
100.229	16.4375	-84.3514	-46.9509	-25.1225	-51.1293	10.09	168.747	-57.5148	-36.4315	0.885207
100.229	16.4792	-88.3046	-46.1203	-33.9632	-55.9212	-5.82428	176.634	-57.4911	-40.5336	13.2343
100.229	16.5208	-85.4537	-42.6584	-24.703	-61.2026	-1.05411	162.057	-54.9659	-34.6523	13.7987
100.229	16.5625	-83.868	-39.7097	-13.8365	-63.2643	11.0587	161.8	-56.0419	-44.0911	18.3007
100.229	16.6042	-80.8907	-29.9403	-1.07514	-55.6453	5.04742	147.809	-55.1292	-49.6695	5.7389
100.229	16.6458	-77.0138	-21.4428	18.8824	-51.4959	15.9315	124.222	-56.5713	-48.0315	-13.5054
100.229	16.6875	-63.2821	-10.9538	31.1206	-39.8715	19.8033	112.64	-58.526	-48.7046	-3.49644
100.229	16.7292	-51.6935	1.06622	62.7251	-32.1006	24.0051	97.1403	-58.3904	-52.1989	-11.0322
100.229	16.7708	-37.969	18.4126	115.631	-29.7226	18.0222	94.8222	-58.5719	-56.7144	-16.1613
100.229	16.8125	-27.4842	39.3713	142.017	-24.7979	17.6111	86.3156	-58.3696	-61.589	-18.413
100.229	16.8542	-56.9212	45.1969	99.6865	-15.8223	2.58732	66.322	-61.3151	-65.4255	-22.6574
100.229	16.8958	-78.2401	33.0466	94.3284	-35.4151	-0.625741	73.7297	-66.9383	-67.0418	-30.7293
100.229	16.9375	-89.6129	21.3919	57.033	-43.7523	0.0684934	59.5219	-66.2493	-74.4909	-29.5121
100.229	16.9792	-95.0456	7.09656	30.9569	-36.1118	-14.5216	38.785	-67.9854	-76.203	-38.8222
100.229	17.0208	-96.3517	-0.420597	18.4885	-34.5271	-12.1844	11.4669	-66.2663	-79.3108	-30.8717
100.229	17.0625	-96.2245	11.4955	33.7356	-36.4727	-16.3286	15.432	-66.7293	-80.7676	-35.507
100.229	17.1042	-96.3654	19.871	48.5434	-37.4041	-19.4972	19.2077	-71.2724	-78.7985	-44.2095
100.229	17.1458	-96.0607	26.0407	53.182	-41.8103	-8.43659	16.4022	-69.8981	-81.4565	-41.0638
100.229	17.1875	-96.6075	32.0057	60.4515	-39.4726	-15.2322	23.5198	-72.6783	-81.309	-50.5088
100.229	17.2292	-92.5611	68.2172	115.959	-36.7756	-4.86113	23.817	-74.3509	-78.1063	-51.0386
100.229	17.2708	-86.3221	102.594	171.682	-28.1819	-0.502171	30.3966	-75.1867	-80.1696	-45.7997
100.229	17.3125	-82.5729	107.178	242.401	-22.1891	7.51313	37.8383	-75.4289	-82.7004	-49.8797
100.229	17.3542	-73.1148	138.44	268.758	-6.72016	7.65015	48.3644	-76.8514	-83.1164	-47.4866
100.229	17.3958	-79.1341	116.687	252.911	-21.2592	31.515	32.4339	-75.4624	-83.1908	-51.7622
100.229	17.4375	-81.5342	103.797	234.149	-20.9869	30.0127	53.9924	-76.3076	-82.8238	-57.878
100.229	17.4792	-81.4918	82.0874	231.078	-11.8457	18.2476	61.5125	-74.2606	-83.3211	-57.5238
100.229	17.5208	-79.2855	117.147	186.685	-9.91682	20.4735	50.0673	-68.8522	-83.808	-59.4896
100.229	17.5625	-75.9935	106.057	202.405	-18.9762	39.0881	63.4662	-69.9476	-82.2356	-60.8265
100.229	17.6042	-75.7669	90.489	200.847	-21.3539	31.129	75.1876	-71.1671	-80.7894	-57.7444
100.229	17.6458	-77.5279	72.6249	199.592	-25.8873	18.2268	91.4471	-70.4954	-81.2601	-53.1514
100.229	17.6875	-76.5822	77.6758	175.342	-22.2255	9.70485	77.3317	-68.4396	-81.537	-45.706
100.229	17.7292	-77.9704	95.1678	130.957	-18.7849	14.1189	82.3259	-72.5208	-80.7811	-45.2365
100.229	17.7708	-78.5121	79.388	123.606	-26.1613	24.2823	81.762	-73.5894	-77.7702	-45.2978
100.229	17.8125	-76.0084	84.4562	117.177	-30.6211	33.4177	63.9055	-70.9633	-73.3939	-48.9038
100.229	17.8542	-75.4527	65.6229	107.242	-36.8925	40.7319	69.0915	-65.8698	-71.496	-51.0486
100.229	17.8958	-72.2259	71.3588	97.7711	-39.1121	35.6991	53.2128	-61.2242	-69.179	-45.8298
100.229	17.9375	-64.8794	50.8154	124.793	-40.6379	42.7824	45.2774	-59.5268	-67.3469	-36.341
100.229	17.9792	-58.044	58.8907	102.902	-37.748	41.9169	43.3734	-57.2082	-65.0916	-31.2199
100.229	18.0208	-51.0156	55.7095	108.033	-32.823	29.8601	48.8273	-57.2422	-60.7768	-30.5498
100.229	18.0625	-46.4118	60.3828	116.551	-35.1706	16.2212	55.6221	-52.6228	-56.2519	-36.5119
100.229	18.1042	-35.0756	71.3087	99.5078	-32.4319	23.0379	51.8928	-47.4746	-56.8995	-33.5494
100.229	18.1458	-25.9589	38.7474	111.886	-26.6655	8.71381	59.9342	-46.3713	-52.9369	-21.7411
100.229	18.1875	-15.1711	43.9439	94.1785	-24.0026	12.7057	56.6205	-45.3806	-46.8266	-22.1041
100.229	18.2292	6.38309	60.5159	89.0852	-32.1775	4.82132	66.1158	-40.3925	-41.3418	-15.1146
100.229	18.2708	24.8734	78.997	84.8012	-30.0851	-4.42424	69.3409	-43.0946	-28.8897	-17.5568
100.229	18.3125	35.2252	67.5917	87.308	-35.3983	9.64445	52.8494	-40.1587	-25.6587	-10.5618
100.229	18.3542	49.7053	55.8986	99.5462	-40.4985	14.984	49.0101	-40.0377	-21.7364	0.584781
100.229	18.3958	54.847	54.4413	87.2275	-38.1814	13.8333	60.4198	-46.8066	-12.5318	1.95651
100.229	18.4375	89.134	58.197	105.329	-33.7488	12.9608	57.5373	-50.0121	-8.59189	8.08517
100.229	18.4792	91.1543	40.6087	96.714	-33.0944	24.0288	56.0896	-54.0837	-4.73037	21.971
100.229	18.5208	86.7703	21.0327	104.245	-29.9746	13.4404	80.1211	-56.207	-6.18272	28.5225
100.229	18.5625	70.4016	28.7988	96.1895	-31.7068	18.4659	80.9149	-57.1961	-11.9902	22.3
100.229	18.6042	67.1835	32.6827	106.141	-38.639	24.2099	68.3539	-56.5231	-8.00333	19.0998
100.229	18.6458	85.2027	34.6422	99.2136	-34.1789	20.8804	83.8188	-58.8621	-7.08653	23.5138
100.229	18.6875	114.644	57.4726	82.0536	-37.0832	32.5933	78.9869	-56.7989	-19.4684	44.1266
100.229	18.7292	97.5666	24.9256	110.277	-41.124	30.5227	89.5101	-58.4573	-4.8584	30.6619
100.229	18.7708	106.446	31.8859	90.8271	-39.3907	25.4568	103.009	-58.2584	-9.05681	39.9845
100.229	18.8125	71.7992	44.2683	80.701	-49.1474	24.4503	121.061	-56.1775	-17.1568	29.7521
100.229	18.8542	67.2773	34.4958	89.9997	-50.1223	16.848	136.954	-53.2836	-25.1893	35.6285
100.229	18.8958	63.5756	36.4311	75.1558	-44.2267	22.6101	113.14	-55.8528	-17.9054	29.582
100.229	18.9375	43.4782	37.3932	73.4775	-52.0519	43.2898	103.699	-50.9069	-21.3659	11.4218
100.229	18.9792	49.5119	47.632	61.2389	-53.9792	42.3869	121.133	-53.396	-10.5508	3.97982
100.229	19.0208	48.2668	30.7506	61.5144	-54.8261	34.5017	147.373	-56.0704	-8.42941	16.1201
100.229	19.0625	47.8391	33.5031	64.9458	-51.7998	39.7704	137.791	-54.7206	-9.33201	2.08055
100.229	19.1042	63.8957	28.4154	72.5127	-50.324	27.7682	148.638	-45.4605	-26.3658	16.7353
100.229	19.1458	59.9083	37.9523	77.7334	-53.0697	34.762	134.364	-42.358	-25.7947	2.86984
100.229	19.1875	90.9317	45.194	83.4469	-55.2746	36.9594	150.736	-42.4427	-28.6121	13.5876
100.229	19.2292	91.4589	46.8347	90.6464	-55.1184	33.0977	153.412	-39.5736	-29.8397	6.56981
100.229	19.2708	102.188	51.1601	86.7795	-54.4679	29.8227	153.567	-43.6134	-26.007	14.5146
100.229	19.3125	85.658	39.5123	93.202	-55.3085	29.522	149.219	-34.8166	-29.1497	3.38615
100.229	19.3542	86.6735	34.1167	87.1791	-57.6097	27.8846	162.536	-31.3221	-25.7411	2.4482
100.229	19.3958	101.254	29.6795	102.21	-56.755	20.678	170.611	-34.7623	-24.3236	10.0784
100.229	19.4375	110.819	44.3502	94.1544	-53.7274	18.3156	176.603	-31.8488	-24.0172	-4.07441
100.229	19.4792	114.817	61.0225	85.7732	-52.1283	20.2108	157.127	-28.2445	-24.5051	-10.4106
100.229	19.5208	117.47	58.6233	89.4941	-51.6065	23.1277	139.911	-29.687	-23.5398	-5.86024
100.229	19.5625	100.934	34.9533	104.823	-53.1653	31.8473	143.992	-36.4894	-24.4515	0.554947
100.229	19.6042	76.7578	14.1111	123.903	-51.4605	37.8931	105.898	-31.1678	-29.4384	3.3573
100.229	19.6458	83.1037	26.2197	102.259	-52.9646	48.3668	108.955	-33.1746	-27.1013	0.969081
100.229	19.6875	46.7033	35.4781	82.8928	-54.1251	50.7434	131.888	-36.7781	-33.0497	-12.7707
100.229	19.7292	41.3243	36.9154	52.9227	-42.4691	38.2317	117.05	-33.2429	-45.2017	6.89558
100.229	19.7708	28.3684	28.8563	57.3748	-39.1356	49.6224	95.3348	-39.6623	-43.9003	5.13041
100.229	19.8125	40.3583	37.2201	58.8233	-38.4246	65.9698	86.0113	-42.4585	-39.5388	-2.61937
100.229	19.8542	24.2162	50.4621	53.8717	-33.6226	54.1639	96.9026	-49.3023	-37.3565	-16.1557
100.229	19.8958	18.128	31.497	81.0215	-36.3257	38.9592	81.8397	-48.3153	-30.5155	-14.1152
100.229	19.9375	-1.76263	34.7244	71.2685	-32.4422	32.5245	87.4493	-46.7981	-35.8939	-25.6175
100.229	19.9792	13.447	57.9497	65.8351	-36.7469	24.4005	100.464	-41.9562	-41.4249	-19.2415
100.229	20.0208	3.39101	51.5971	61.0095	-30.1111	13.6162	98.2318	-41.3996	-46.1486	-14.7251
100.229	20.0625	-6.58441	58.6444	55.8443	-36.8141	20.9392	97.1535	-42.4456	-48.5884	-15.2438
100.229	20.1042	-10.8713	64.502	61.7082	-44.7448	25.9422	76.4598	-42.6929	-45.4734	-12.6812
100.229	20.1458	-28.1486	45.76	62.6981	-44.6645	15.5687	70.9324	-41.8172	-49.2107	-6.2051
100.229	20.1875	-39.7773	45.1575	62.6714	-43.2352	6.21816	61.4408	-45.7935	-48.3638	-6.39209
100.229	20.2292	-55.5802	34.1516	69.207	-39.8791	-6.62102	48.2312	-49.9137	-44.8178	-14.9195
100.229	20.2708	-61.4255	30.7431	59.6007	-29.5237	-17.9495	24.6628	-51.5317	-46.2139	-1.63126
100.229	20.3125	-66.3517	34.0136	47.2835	-30.047	-15.1445	8.27426	-52.5074	-40.9151	-5.47521
100.229	20.3542	-73.6819	13.961	28.6601	-25.3384	-4.77259	-12.6943	-47.7971	-40.8284	-6.38541
100.229	20.3958	-76.588	20.1182	22.0986	-21.6063	-16.8402	-14.5323	-47.7704	-38.7943	-10.378
100.229	20.4375	-79.2074	11.4057	29.1812	-29.4973	-21.2951	-9.75153	-55.5651	-30.6162	-6.42241
100.229	20.4792	-81.5191	21.1362	23.4236	-44.2009	-13.877	-18.9089	-51.7304	-25.0335	-12.3422
100.229	20.5208	-82.8473	11.7261	8.51829	-37.1668	-17.5997	-23.5305	-45.0126	-29.2853	-8.10416
100.229	20.5625	-81.2191	10.0918	1.19353	-29.9241	-27.5416	-11.0363	-44.8972	-28.2611	-5.59162
100.229	20.6042	-78.7813	9.91332	-3.09744	-27.0622	-25.1893	-9.92891	-35.8588	-33.4311	-5.06573
100.229	20.6458	-75.7927	18.2966	-13.199	-39.1393	-21.0541	2.70885	-43.2176	-14.7523	-1.30871
100.229	20.6875	-78.0856	2.75707	-6.22493	-41.4609	-19.3721	1.43554	-41.7819	-6.34738	-12.8775
100.229	6.72917	-62.9753	-47.4807	-13.2834	36.5896	-38.4939	-9.08428	48.6448	-7.85995	-22.2864
100.229	6.77083	-66.8309	-48.1084	-14.207	36.0543	-39.5648	-15.5401	84.5822	-23.833	-23.6912
100.229	6.8125	-66.1989	-41.984	-22.7049	48.1249	-43.942	-14.6847	85.8147	-15.1751	-32.4951
100.229	6.85417	-70.2141	-45.2854	-18.641	44.8447	-42.1916	-15.574	71.9957	-15.681	-34.7338
100.229	6.89583	-69.4582	-45.1257	-11.8167	23.3839	-35.9522	-20.9162	61.1963	-18.3275	-23.2889
100.229	6.9375	-76.9915	-45.9855	-9.77442	32.3969	-35.1316	-32.0411	67.9374	-30.8328	-30.3626
100.229	6.97917	-76.7143	-44.6762	-8.70003	29.6985	-39.6026	-23.1314	50.0066	-27.7402	-29.3687
100.229	7.02083	-79.1162	-44.1685	-18.6231	39.8529	-42.945	-13.4386	38.6667	-25.0033	-36.008
100.229	7.0625	-78.2373	-43.1645	-8.88193	19.363	-39.3002	-15.7275	40.3169	-29.7913	-30.1375
100.229	7.10417	-82.7586	-44.7238	-15.2231	26.208	-41.7344	-11.9202	32.8437	-30.8419	-38.1702
100.229	7.14583	-82.6559	-38.4002	-8.47939	11.433	-40.2502	-22.7918	27.8332	-31.9571	-31.196
100.229	7.1875	-84.9768	-39.4372	-17.85	35.2521	-45.4998	-35.4171	28.1366	-25.0269	-33.9746
100.229	7.22917	-84.8632	-36.2457	-21.3341	20.4203	-45.4128	-31.7993	17.9992	-27.3866	-21.429
100.229	7.27083	-85.4194	-29.0011	-22.7302	26.3743	-50.6326	-38.0261	24.4577	-21.081	-30.0156
100.229	7.3125	-86.9371	-34.5829	-11.6681	18.6235	-58.5422	-36.2832	22.3222	-17.7587	-28.2858
100.229	7.35417	-86.5471	-31.8795	-14.7671	29.2589	-62.7791	-35.7928	23.6844	-19.0992	-25.0395
100.229	7.39583	-85.7971	-33.9743	-6.15183	20.5556	-57.5694	-41.127	42.5312	-25.9785	-27.8582
100.229	7.4375	-85.2403	-34.0543	-2.61602	12.6108	-63.7856	-28.8268	48.1351	-27.4483	-26.3248
100.229	7.47917	-84.2177	-34.7173	-5.21988	14.8145	-59.1156	-34.4634	37.5193	-20.8755	-23.8021
100.229	7.77083	-77.6558	-28.708	-1.87177	-0.764139	-53.3075	-23.0048	15.7933	-8.2858	-15.6993
100.229	7.8125	-78.0732	-30.4171	11.1266	-2.53584	-54.7229	-31.3367	17.8805	-7.15685	-14.4906
100.229	7.85417	-75.557	-21.2862	9.22468	-8.73099	-53.981	-20.8309	-1.86324	-7.91501	-5.38797
100.229	7.89583	-72.0193	-12.1212	11.4291	-16.7257	-51.8527	-15.25	-0.225412	-13.7654	-2.26448
100.229	7.9375	-73.8144	-12.4172	0.890417	-14.4809	-51.0447	-24.6936	10.926	-6.82262	-9.06002
100.229	7.97917	-75.3752	-15.136	-6.9772	-5.46177	-57.2832	-22.5771	4.22075	-0.933403	-3.372
100.229	8.02083	-77.1064	-13.9921	-5.98204	-12.039	-55.9082	-21.2184	4.97215	-5.81054	-6.28334
100.229	8.0625	-79.827	-17.8169	-12.6911	-8.28752	-55.1253	-20.2695	-3.43229	-7.33461	-4.25304
100.229	8.10417	-76.9448	-1.04031	0.977717	-18.047	-54.6995	-14.4657	-0.448232	-18.5552	-10.3882
100.229	8.14583	-75.0395	-6.38401	7.63033	-18.3134	-43.9946	-26.7601	-8.37606	-8.19257	-12.1071
100.229	8.1875	-74.0389	-7.29088	3.78673	-15.8426	-45.4833	-21.0293	-19.2051	-6.29356	-1.64017
100.229	8.22917	-72.8496	-2.11966	1.47133	-11.6427	-46.0572	-29.752	-13.1746	-14.6355	10.1549
100.229	8.27083	-66.4637	-9.02485	13.0404	-4.67279	-51.8427	-25.8962	-6.03588	-15.981	21.4227
100.229	8.3125	-64.1986	5.81526	15.2537	-14.4471	-48.7007	-28.3942	-0.133297	-20.2345	17.2645
100.229	8.35417	-59.7825	4.41002	31.0041	-31.8102	-37.1541	-27.5219	-7.76646	-25.0775	36.9881
100.229	8.39583	-65.9787	-2.88919	17.1811	-28.1167	-36.2954	-30.4257	-15.1413	-10.5593	23.6365
100.271	13.5625	-96.0331	-62.4404	-16.1181	237.327	-1.27396	-85.6022	-78.4019	22.5354	-0.777287
100.271	13.6042	-96.4068	-63.6795	-17.9055	238.129	-0.188689	-86.6921	-77.947	25.8651	-3.33583
100.271	13.6458	-96.5546	-64.2607	-16.0069	219.691	-1.67318	-87.3885	-75.4497	30.6751	-9.7523
100.271	13.6875	-96.2784	-63.4698	-14.7821	233.789	-18.1786	-87.1431	-71.9997	40.1434	-13.2376
100.271	13.7292	-96.5845	-61.6392	-15.5972	215.396	-21.688	-88.7049	-68.3397	37.1588	-12.9232
100.271	13.7708	-97.2289	-64.8118	-15.292	222.648	-32.2305	-89.5583	-65.4646	48.8194	-20.7719
100.271	13.8125	-97.2181	-65.8802	-21.9315	223.369	-34.1496	-90.1632	-64.3444	61.4608	-13.3926
100.271	13.8542	-97.5998	-66.5225	-14.9451	202.763	-24.2525	-89.8876	-63.567	57.2901	-36.5727
100.271	13.8958	-97.2714	-62.8868	-10.8824	203.813	-21.0158	-88.8667	-62.9283	26.3719	-34.0852
100.271	13.9375	-97.1528	-59.1079	-1.64658	177.443	-16.2105	-86.2488	-59.0156	1.0404	-46.5225
100.271	13.9792	-96.9482	-58.771	3.73951	175.002	-15.2075	-83.0746	-57.9099	-12.305	-51.0197
100.271	14.0208	-97.1593	-56.8576	7.28606	166.871	-20.7086	-81.9565	-61.8402	-20.575	-46.9652
100.271	14.0625	-97.2847	-49.8995	1.03838	145.143	-22.4487	-80.6008	-64.1968	-23.0477	-47.2102
100.271	14.1042	-97.5095	-50.7041	10.5873	133.573	-28.7505	-77.7341	-65.0534	-35.0766	-45.6591
100.271	14.1458	-97.4439	-45.4154	-2.93191	118.463	-21.8539	-75.0984	-67.6375	-44.5875	-36.7192
100.271	14.1875	-97.6023	-45.2948	3.32333	105.135	-26.0947	-72.5898	-65.5577	-52.1509	-38.0604
100.271	14.2292	-97.5328	-39.1812	0.438353	109.751	-23.2495	-73.9037	-61.3953	-51.2721	-48.8928
100.271	14.2708	-97.5166	-38.0101	1.45439	89.757	-28.0452	-68.4292	-62.7013	-50.8504	-50.0304
100.271	14.3125	-97.9516	-41.7118	-5.22486	91.2184	-26.8298	-63.6547	-63.2529	-51.694	-58.9227
100.271	14.3542	-97.8952	-33.1322	-8.80547	63.2457	-12.4956	-62.0208	-58.1951	-63.3336	-58.4937
100.271	14.3958	-97.9292	-26.1909	-16.9237	58.903	-16.498	-51.3641	-58.3327	-68.5412	-60.0772
100.271	14.4375	-97.9905	-27.876	-18.2014	60.4381	-17.3932	-46.6252	-55.8564	-70.7414	-62.7193
100.271	14.4792	-97.9283	-27.6185	-11.2721	58.3849	-16.9842	-45.9238	-50.8771	-74.3903	-63.9359
100.271	14.5208	-97.8102	-30.3342	-6.25195	53.0528	-14.5883	-38.0229	-48.8626	-75.1896	-67.3821
100.271	14.5625	-97.5552	-32.1051	0.0046141	49.0923	-13.3543	-34.5362	-39.5143	-77.4788	-68.7436
100.271	14.6042	-97.4842	-28.714	-2.21991	49.2093	-11.6815	-28.341	-33.5294	-77.6748	-74.2435
100.271	14.6458	-97.4263	-29.5273	-6.10734	60.9533	-8.75887	-28.1572	-34.4628	-78.3369	-74.0324
100.271	14.6875	-97.3117	-24.506	-7.30185	56.7127	-9.48832	-37.0261	-39.9488	-76.8363	-69.0826
100.271	14.7292	-97.3517	-20.7847	-10.8687	60.226	-8.55025	-44.6218	-48.4733	-74.8435	-64.3391
100.271	14.7708	-97.3582	-22.3006	-9.17429	56.5874	0.286086	-53.8134	-56.425	-71.4726	-58.4796
100.271	14.8125	-97.4549	-21.0413	-11.0636	60.7622	-6.64797	-54.8192	-63.2477	-70.1817	-51.2243
100.271	14.8542	-97.5221	-24.233	-13.7087	64.4441	-6.77372	-57.4856	-65.9737	-69.197	-44.521
100.271	14.8958	-97.5966	-29.9995	-11.9383	66.5092	-4.48686	-60.3885	-67.6942	-69.1766	-37.8471
100.271	14.9375	-97.8232	-32.5955	-7.20922	85.4217	-12.0626	-64.9767	-67.9499	-71.4884	-33.3074
100.271	14.9792	-97.8162	-32.8022	-9.9996	109.022	-12.0686	-65.762	-67.9797	-71.1292	-37.9297
100.271	15.0208	-97.8079	-29.4737	-6.13446	113.302	-12.272	-68.17	-65.0007	-68.2221	-50.0142
100.271	15.0625	-97.3566	-25.6098	7.21146	101.091	-10.8052	-69.2348	-58.8481	-72.4542	-47.0129
100.271	15.1042	-97.2511	-28.394	5.18199	135.369	-14.2388	-67.6514	-55.8478	-73.7485	-51.7763
100.271	15.1458	-96.476	-28.3052	13.7394	163.041	-17.2629	-68.1162	-49.5429	-70.4395	-58.2446
100.271	15.1875	-94.14	-22.1222	15.7181	159.407	-10.9989	-67.6083	-45.5937	-64.4809	-55.0056
100.271	15.2292	-90.3133	-25.9741	13.9495	209.346	-10.4322	-63.6284	-40.8078	-59.0617	-52.9752
100.271	15.2708	-84.4587	-20.9251	5.63261	256.405	-7.13559	-62.6919	-27.5899	-56.5327	-52.1267
100.271	15.3125	-75.3289	-24.1683	17.9793	264.41	-12.7164	-61.2743	-10.7619	-53.3103	-46.2673
100.271	15.3542	-59.4395	-11.7105	11.9473	258.8	-7.75704	-59.9861	3.67191	-51.4945	-38.3787
100.271	15.3958	-35.7108	-12.0043	25.2964	247.613	-10.1256	-55.6513	11.3483	-38.8201	-38.2222
100.271	15.4375	-14.5187	-15.6756	18.5443	237.426	-4.30046	-54.9622	16.3918	-27.6946	-30.1319
100.271	15.4792	4.51814	-21.9541	22.2079	226.167	-7.0964	-49.0393	10.2138	-2.71918	-33.8133
100.271	15.5208	19.9025	-28.3582	17.4085	210.384	-7.9043	-40.6418	20.5907	-4.02277	-27.4128
100.271	15.5625	-7.24477	-34.3434	4.15673	205.195	-4.35727	-41.4763	18.0174	-13.9514	-21.8153
100.271	15.6042	-25.3922	-36.2726	-4.42956	178.137	-4.92326	-42.0632	16.7943	-14.4344	-19.9934
100.271	15.6458	-42.0638	-36.8633	-12.9535	144.465	-11.0596	-34.4803	12.7655	-11.6013	-25.7653
100.271	15.6875	-51.8167	-34.9568	-20.5674	129.163	-11.4574	-31.9154	5.27441	-21.4087	-18.4072
100.271	15.7292	-68.5148	-36.1317	-26.5097	91.8251	-11.5043	-23.8395	-8.84268	-25.5107	-23.5903
100.271	15.7708	-77.145	-38.8555	-28.2095	66.6982	-7.4203	-26.7199	-18.5244	-24.4876	-25.1696
100.271	15.8125	-83.9965	-40.9203	-30.7212	37.2096	-6.41653	-22.0297	-18.3722	-31.148	-30.512
100.271	15.8542	-84.4867	-37.2763	-31.3435	22.2179	-17.4682	-14.7235	-21.6111	-31.8758	-21.5758
100.271	15.8958	-86.5221	-29.5962	-38.6861	5.14346	-13.7047	-4.30242	-33.4711	-35.8414	-15.7577
100.271	15.9375	-91.0899	-33.2717	-43.0692	-8.04031	-17.4739	14.6341	-42.0725	-43.3236	-17.8826
100.271	15.9792	-91.2832	-26.3652	-40.7702	-20.9851	-9.49027	13.7603	-38.7835	-48.0471	-22.757
100.271	16.0208	-91.4836	-26.5604	-43.7651	-25.3691	-9.87197	24.09	-42.9091	-43.7114	-23.119
100.271	16.0625	-91.3006	-32.1072	-43.0811	-27.9836	-5.71639	36.1599	-48.9156	-39.8899	-20.7033
100.271	16.1042	-91.1784	-36.5179	-43.5628	-36.8496	7.88679	42.5577	-48.025	-41.5461	-16.5574
100.271	16.1458	-90.1923	-41.0736	-41.1853	-41.6115	6.30156	64.6412	-48.6732	-43.0467	-5.26661
100.271	16.1875	-88.4275	-48.7441	-40.7392	-36.8098	9.67614	92.8964	-50.9546	-40.2844	-2.69315
100.271	16.2292	-78.8593	-53.2146	-26.0439	-31.2679	27.6322	112.538	-49.5638	-40.2839	8.80354
100.271	16.2708	-55.5386	-46.8772	-9.97618	-16.6364	36.4934	167.859	-52.9281	-36.9896	2.84356
100.271	16.3125	-70.2809	-49.5462	-14.9278	-33.5417	34.6523	153.861	-50.6395	-39.8367	2.63246
100.271	16.3542	-78.392	-49.4791	-27.5197	-41.2508	16.359	175.389	-55.3824	-35.8563	9.52533
100.271	16.3958	-85.1299	-48.2812	-31.2465	-50.2717	-2.08625	192.528	-56.6949	-35.0151	4.32933
100.271	16.4375	-85.6924	-45.0282	-35.3234	-51.6212	-1.28984	179.38	-58.909	-36.72	15.9988
100.271	16.4792	-85.6352	-42.9608	-33.7158	-56.4484	1.73113	170.702	-58.4542	-36.3179	19.7352
100.271	16.5208	-83.2982	-39.5005	-24.1305	-61.3223	-1.40073	162.412	-53.0413	-31.5639	13.1427
100.271	16.5625	-79.7156	-36.3549	-12.4726	-61.4848	3.66433	153.143	-48.315	-39.6902	15.5776
100.271	16.6042	-73.5761	-29.9317	1.36645	-55.5935	9.8491	145.144	-53.199	-44.3139	19.3752
100.271	16.6458	-65.5277	-20.3106	22.9154	-45.8641	2.20154	139.641	-57.4275	-39.1376	2.44294
100.271	16.6875	-51.8008	-4.52854	43.3676	-38.4634	8.72567	127.576	-58.1887	-41.2583	-5.83617
100.271	16.7292	-35.7774	7.13929	84.7267	-31.8742	17.7655	116.783	-56.5952	-49.366	-15.1066
100.271	16.7708	-13.5285	25.2336	127.768	-20.7915	21.1894	97.3837	-60.228	-48.7976	-21.4321
100.271	16.8125	18.6877	56.244	167.323	-14.2501	17.1341	103.263	-59.852	-59.0175	-15.4084
100.271	16.8542	-24.6303	64.5317	156.027	-17.2858	15.1903	74.6933	-60.5488	-62.9204	-26.5158
100.271	16.8958	-66.3185	34.4242	139.3	-32.9102	0.866557	83.0271	-67.195	-64.7155	-26.9654
100.271	16.9375	-83.3556	20.1875	80.7771	-36.5472	-1.86976	64.8348	-68.4261	-69.1618	-23.3441
100.271	16.9792	-91.9951	9.93019	44.1178	-37.698	-6.80639	38.0445	-67.74	-71.9264	-30.3931
100.271	17.0208	-95.0839	5.13178	25.5815	-34.9877	-18.9152	24.1789	-67.0767	-76.5954	-26.1799
100.271	17.0625	-96.2294	11.1232	28.8326	-41.6914	-15.135	21.084	-67.8387	-79.1477	-34.454
100.271	17.1042	-96.5295	13.8398	32.644	-40.8004	-15.9138	23.3648	-70.5472	-76.8839	-45.0283
100.271	17.1458	-96.5279	11.9384	42.2005	-40.2741	-11.3149	17.6523	-72.3843	-77.2138	-44.3754
100.271	17.1875	-96.6524	21.8138	45.4345	-40.9989	-16.7174	26.4481	-73.4309	-78.1248	-47.6743
100.271	17.2292	-91.6113	59.6821	99.0049	-39.5798	-1.98617	28.5116	-74.4034	-76.0277	-43.4709
100.271	17.2708	-82.4102	96.6984	204.417	-26.546	7.84372	41.8637	-77.6331	-77.1682	-48.8127
100.271	17.3125	-68.0398	129.479	297.376	-21.6707	16.7153	49.6038	-77.5985	-77.8357	-48.3895
100.271	17.3542	-53.5238	144.93	327.614	-12.0125	23.7279	44.0105	-74.0023	-79.9256	-45.7652
100.271	17.3958	-65.3551	121.647	301.002	-19.1041	33.7639	44.9799	-72.1377	-82.1617	-50.0096
100.271	17.4375	-67.1167	110.124	286.418	-6.6913	19.8624	53.4739	-72.2808	-82.708	-50.7762
100.271	17.4792	-73.9367	111.253	268.157	-10.9616	7.08863	87.4033	-72.3122	-83.3869	-59.2287
100.271	17.5208	-71.9076	126.761	183.28	-1.72969	26.9349	53.3961	-65.6912	-83.8043	-58.8678
100.271	17.5625	-75.5014	78.8214	183.814	-6.28315	34.5833	72.7447	-68.1771	-84.1847	-55.9792
100.271	17.6042	-75.7532	100.494	151.783	-9.60062	34.9185	77.22	-70.7107	-81.907	-58.0669
100.271	17.6458	-77.4309	71.4127	164.72	-22.5307	40.3363	64.1662	-68.9248	-80.3081	-54.4594
100.271	17.6875	-80.0452	64.8197	156.244	-18.5215	19.4632	72.8899	-67.5295	-81.3442	-53.6516
100.271	17.7292	-79.4662	65.0841	119.343	-20.1138	22.6671	82.7153	-67.0341	-83.2865	-42.5177
100.271	17.7708	-80.9644	57.1033	112.419	-24.2357	25.8363	76.6544	-67.5231	-81.1028	-44.8149
100.271	17.8125	-76.307	63.7043	107.909	-30.2102	28.9851	87.7734	-70.4351	-76.3916	-40.9964
100.271	17.8542	-73.7513	74.7398	122.359	-41.3948	23.7794	111.099	-68.633	-73.3882	-47.15
100.271	17.8958	-70.8499	63.2149	104.723	-41.4499	34.9682	94.7181	-66.8478	-70.1356	-42.7359
100.271	17.9375	-66.4634	61.7945	110.731	-41.1476	46.2121	51.9868	-57.7773	-72.101	-36.153
100.271	17.9792	-62.3035	65.1776	104.05	-38.4466	39.9397	43.9406	-57.5334	-68.7859	-31.9485
100.271	18.0208	-63.3564	57.1841	77.5037	-31.6665	35.8494	47.1445	-57.2098	-65.9138	-34.079
100.271	18.0625	-51.6667	61.9234	93.0495	-34.9857	19.6187	70.5139	-53.9335	-61.0506	-35.0148
100.271	18.1042	-45.0227	67.6843	92.7379	-35.89	20.0878	71.7998	-49.1902	-60.7378	-35.5305
100.271	18.1458	-34.9089	54.7505	113.382	-36.0599	20.181	55.1461	-43.9391	-58.7879	-28.4358
100.271	18.1875	-22.3606	66.7372	83.605	-27.4519	8.89101	64.9814	-48.3432	-49.0698	-26.0378
100.271	18.2292	-12.4935	59.2664	71.5163	-29.2592	7.87802	62.7869	-46.058	-37.8653	-23.0645
100.271	18.2708	-5.65583	53.2666	85.3815	-33.5745	7.37616	58.1009	-44.3104	-32.0526	-22.1826
100.271	18.3125	6.17282	74.1985	93.1848	-43.3706	24.2404	47.0074	-47.3191	-23.2665	-24.5405
100.271	18.3542	35.7636	53.8574	94.1251	-36.4935	10.9829	50.8837	-45.3438	-13.355	-9.74254
100.271	18.3958	54.2499	55.7968	97.883	-37.2841	20.3928	55.4843	-53.0996	-2.92832	-6.38979
100.271	18.4375	61.0963	46.2941	99.8545	-33.687	29.4673	47.7088	-53.2085	-13.5854	7.45473
100.271	18.4792	49.1081	25.2902	106.331	-30.2033	15.4986	64.9117	-52.8117	-9.75524	1.88276
100.271	18.5208	59.3597	11.2278	124.583	-30.9157	23.589	54.0717	-53.9773	-13.4187	21.7054
100.271	18.5625	58.0253	15.6306	112.934	-26.9201	18.0085	73.199	-55.8804	-15.4241	15.1526
100.271	18.6042	57.1611	20.1937	112.088	-33.9449	31.7394	63.7982	-58.9052	-8.81646	15.4286
100.271	18.6458	75.7893	32.3013	101.848	-35.6398	38.9082	66.176	-56.9399	-15.643	21.9817
100.271	18.6875	98.2495	51.9283	86.9485	-36.5939	43.5254	76.6099	-56.1186	-22.5834	27.8384
100.271	18.7292	97.3621	46.8601	102.589	-41.4247	31.4851	95.6199	-58.7088	-13.0739	22.6686
100.271	18.7708	84.9635	38.0122	95.892	-37.8411	14.6009	108.31	-54.1178	-17.929	22.4382
100.271	18.8125	107.604	43.8457	92.7544	-41.2061	25.9041	106.562	-56.8327	-24.298	49.8471
100.271	18.8542	75.7892	47.5113	82.826	-40.8727	19.0534	109.816	-56.8233	-21.0095	29.4009
100.271	18.8958	55.3392	28.6067	82.805	-41.1715	22.3346	103.276	-53.5944	-17.1303	17.4466
100.271	18.9375	51.3117	38.7389	64.0109	-41.8616	39.2995	87.799	-53.9952	-14.9303	11.7167
100.271	18.9792	58.4494	43.4214	59.6072	-46.3908	45.1573	92.5241	-51.2228	-7.57932	2.48842
100.271	19.0208	58.499	39.2159	62.2872	-53.2192	51.9391	113.474	-53.1242	-8.90951	8.28021
100.271	19.0625	69.5474	39.1526	62.4193	-52.1507	40.7659	129.786	-51.5443	-15.5048	18.3828
100.271	19.1042	69.1783	40.0391	63.7607	-51.3183	31.7495	147.257	-45.5301	-21.0188	8.12914
100.271	19.1458	89.1501	48.1866	75.3402	-51.2757	34.1417	148.831	-47.0758	-22.6594	9.35537
100.271	19.1875	82.8984	49.8895	84.9338	-55.3585	34.1934	149.796	-45.5405	-25.3918	8.51942
100.271	19.2292	86.0176	44.0247	87.8094	-55.6738	28.5069	157.145	-41.8308	-20.45	1.46136
100.271	19.2708	85.797	40.152	95.4134	-53.1535	23.8964	151.92	-44.4721	-17.2754	1.00447
100.271	19.3125	78.609	28.7388	107.189	-54.6099	26.9661	159.062	-46.0552	-18.6715	2.23097
100.271	19.3542	83.2033	31.3921	89.1821	-53.3623	38.436	139.112	-42.6212	-19.742	3.67066
100.271	19.3958	98.4426	40.3188	72.3958	-50.9036	19.9904	151.313	-38.3174	-20.2724	12.6705
100.271	19.4375	120.4	47.628	87.3834	-54.1636	28.1753	138.17	-31.3883	-25.869	11.947
100.271	19.4792	132.946	64.7045	84.766	-51.9347	25.8947	131.471	-27.4351	-23.3083	-1.79884
100.271	19.5208	116.045	48.2058	84.3066	-46.3047	26.7069	104.618	-35.1104	-19.7592	9.11554
100.271	19.5625	92.747	34.2998	89.2669	-44.9835	25.946	113.869	-37.9433	-24.2511	8.85468
100.271	19.6042	56.0929	19.0165	87.0505	-47.6246	55.2163	94.6711	-40.7194	-19.9058	-6.68806
100.271	19.6458	48.4879	18.687	97.8856	-49.0567	50.7529	90.5469	-37.7102	-21.8339	-11.2674
100.271	19.6875	50.0225	29.9105	78.9044	-48.803	54.0108	91.6744	-38.605	-27.9202	-3.48711
100.271	19.7292	50.484	34.0461	48.295	-35.3154	37.7277	87.0671	-35.0506	-34.9455	7.5071
100.271	19.7708	48.7255	32.2016	59.9758	-31.3812	31.7977	83.742	-35.6567	-33.1563	-1.60533
100.271	19.8125	49.4608	51.8367	55.1816	-28.1121	41.9068	83.0511	-45.8234	-29.7641	-10.7294
100.271	19.8542	13.2828	28.6491	70.0439	-25.1553	34.7411	79.8928	-44.3127	-39.9964	-14.5745
100.271	19.8958	12.4803	26.0762	101.61	-26.6929	20.0644	87.0823	-49.9688	-42.2231	-7.02976
100.271	19.9375	-13.9052	40.2109	72.9123	-31.6919	19.666	79.9847	-46.1665	-43.9935	-19.9428
100.271	19.9792	-15.8287	37.739	73.6753	-30.7604	9.71532	75.277	-42.8582	-46.5211	-13.5259
100.271	20.0208	-6.60287	45.8989	73.9185	-34.784	10.4617	80.5348	-45.9009	-47.5577	-0.244407
100.271	20.0625	-11.5058	49.8447	49.9972	-33.5228	10.1244	80.9375	-49.1776	-47.3936	11.1762
100.271	20.1042	-28.0775	47.7217	60.1975	-42.1235	4.51179	73.6119	-42.8429	-46.0456	-6.15291
100.271	20.1458	-41.7046	43.9386	57.6811	-41.8026	7.99625	61.3436	-42.6585	-51.9953	-7.98451
100.271	20.1875	-58.9988	21.1654	75.2924	-43.5462	3.10794	32.0616	-45.9829	-52.6017	-1.9159
100.271	20.2292	-64.8138	24.751	53.3683	-37.3675	-10.5575	34.9098	-48.6941	-50.3699	-4.4364
100.271	20.2708	-71.4885	12.2532	58.0048	-35.7418	-19.8469	12.6127	-48.2284	-41.7482	-8.10027
100.271	20.3125	-71.7618	31.4628	39.3419	-34.0672	-10.8446	2.34202	-50.1235	-40.59	-13.5242
100.271	20.3542	-75.171	25.2853	17.0395	-24.4695	-14.9034	-7.73409	-49.4243	-43.5927	0.0859013
100.271	20.3958	-79.9598	13.4283	21.1897	-32.7368	-12.4128	-14.9241	-57.6749	-30.8013	-0.689581
100.271	20.4375	-82.436	14.7048	31.3071	-39.7957	-16.1228	-21.8944	-56.0597	-30.4664	-3.22986
100.271	20.4792	-86.3753	12.1368	14.5506	-39.4059	-32.3737	-18.4389	-50.3891	-34.6046	-2.17992
100.271	20.5208	-87.8202	11.6278	4.18723	-44.6271	-28.2596	-15.2002	-49.8035	-37.8003	-0.428535
100.271	20.5625	-85.7746	8.59468	10.1573	-36.6288	-34.1145	-25.0539	-37.4882	-36.1241	-4.82712
100.271	20.6042	-82.9899	-3.06533	-5.61182	-27.6739	-32.7574	-13.6657	-39.3783	-30.0583	4.42931
100.271	20.6458	-80.9763	2.34507	-12.0039	-32.5494	-31.9083	-4.8537	-45.2063	-8.32792	-3.76696
100.271	20.6875	-79.3256	7.54834	-15.1021	-36.9084	-29.9606	-8.88086	-37.6252	-5.00413	-5.09357
100.271	20.7292	-78.9606	12.851	-11.9234	-42.8534	-25.1949	-14.2377	-30.883	-8.985	-8.21923
100.271	6.72917	-59.5543	-46.515	-23.7864	51.6588	-35.3642	-9.31406	61.0431	-9.96449	-23.021
100.271	6.77083	-65.4706	-49.7865	-16.5687	51.818	-40.2137	-8.64228	63.1316	-7.5859	-34.0684
100.271	6.8125	-64.3283	-47.5251	-24.8018	63.2657	-47.3139	-4.53713	91.1242	-17.7971	-29.9291
100.271	6.85417	-65.8613	-41.7632	-24.6289	58.8473	-45.0693	-2.59911	79.9445	-20.4351	-36.0814
100.271	6.89583	-70.5186	-48.2404	-23.6535	70.03	-40.3777	-13.3309	69.2875	-29.9735	-28.3722
100.271	6.9375	-72.3831	-48.9734	-16.7851	60.212	-36.4885	-25.1406	76.8959	-31.8744	-29.1475
100.271	6.97917	-73.879	-45.4185	-11.0164	44.1233	-35.6521	-22.8747	33.2695	-17.1466	-31.903
100.271	7.02083	-73.1842	-45.5146	-12.7996	33.5017	-34.3168	-1.87143	16.3946	-19.7229	-29.8009
100.271	7.0625	-77.8272	-46.2442	-15.786	27.8354	-33.9307	-3.82837	16.4314	-28.1093	-27.9606
100.271	7.10417	-77.7734	-39.0125	-17.8969	23.5367	-34.2429	-14.302	18.7863	-26.0385	-27.4244
100.271	7.14583	-83.6534	-43.6559	-13.7845	12.6864	-33.4788	-14.9573	11.6384	-32.5785	-29.8685
100.271	7.1875	-86.0451	-48.6663	-12.8046	18.2985	-37.6828	-25.9868	19.8769	-29.4101	-32.4762
100.271	7.22917	-85.554	-43.8457	-18.8406	30.0192	-46.5434	-24.4715	13.6117	-24.2259	-29.8605
100.271	7.27083	-83.0219	-31.0926	-21.8979	32.4414	-48.1673	-37.5783	28.4684	-23.8966	-24.6996
100.271	7.3125	-84.1837	-27.7302	-18.6242	26.8345	-54.9699	-38.3879	26.1696	-18.2675	-25.8864
100.271	7.35417	-83.3654	-28.4397	-15.9499	25.7032	-60.0355	-34.5271	31.3257	-16.8155	-23.029
100.271	7.39583	-85.6177	-40.7711	-6.15512	25.6579	-57.5714	-35.3024	37.548	-22.3083	-29.8031
100.271	7.52083	-82.8805	-28.358	-20.1133	20.2263	-56.1609	-28.0139	48.3233	-35.2813	-17.8703
100.271	7.5625	-81.7369	-36.919	-13.8429	20.0783	-56.6707	-24.0277	38.0653	-27.615	-14.9354
100.271	7.60417	-80.2634	-31.0951	-14.0066	14.665	-55.2896	-22.6885	28.5405	-24.09	-13.8739
100.271	7.77083	-77.0892	-34.9323	-1.7085	-1.71796	-52.8465	-10.0558	1.91043	5.10597	-19.7672
100.271	7.8125	-73.1349	-26.9561	-1.40838	-0.865411	-52.5006	-10.955	-2.80382	-1.8221	-6.76484
100.271	7.85417	-69.9773	-18.0624	-0.373429	-5.60462	-50.4601	-18.763	1.70574	-4.99647	0.194922
100.271	7.89583	-69.8441	-11.0739	2.42372	-14.1044	-50.4301	-18.6806	3.73522	-0.674213	-7.1952
100.271	7.9375	-71.2769	-19.9522	13.3679	-27.3913	-53.5937	-10.4307	7.35693	2.3977	-4.60039
100.271	7.97917	-70.6825	-12.8512	4.27772	-20.2603	-53.6961	-20.5379	4.43077	9.08789	-3.48003
100.271	8.02083	-68.1188	2.24261	-9.42573	-16.4029	-48.2556	-20.8562	-0.232647	6.17041	-5.06323
100.271	8.0625	-72.5618	-14.592	-0.233836	-19.2414	-48.8158	-20.6601	-5.74003	0.663248	3.48046
100.271	8.10417	-70.7366	4.74868	-8.82583	-20.0886	-46.0575	-19.4763	4.27757	-9.42784	-6.53378
100.271	8.14583	-73.5464	-2.52974	1.00628	-10.7441	-43.0273	-36.3052	3.11397	-1.51138	-18.3132
100.271	8.1875	-70.9153	-3.62671	3.40403	-16.1828	-41.337	-34.4582	-11.4231	-4.60858	7.18269
100.271	8.22917	-65.1788	9.61154	-4.00258	-6.706	-42.1275	-40.5362	4.26576	-19.6102	22.972
100.271	8.27083	-59.4152	8.46395	0.964693	-13.2742	-43.75	-23.2105	-8.56253	-16.2445	29.1808
100.312	13.5208	-96.0116	-61.1043	-21.5377	246.096	8.17986	-84.6402	-78.106	3.02567	0.747703
100.312	13.5625	-96.3675	-62.5025	-20.3269	260.432	12.6738	-86.5049	-80.2822	20.0855	-6.30389
100.312	13.6042	-96.38	-65.8845	-24.1147	278.515	13.9734	-87.7208	-76.9013	21.7378	-6.12971
100.312	13.6458	-96.0632	-64.2425	-24.2975	282.698	-2.26625	-87.3589	-74.881	27.9371	-4.28494
100.312	13.6875	-96.1586	-66.3552	-16.2702	268.941	-11.5948	-88.2628	-70.7305	34.5611	-9.56022
100.312	13.7292	-96.5013	-66.6149	-17.5628	261.294	-18.6509	-88.3496	-69.3088	44.0944	-16.0501
100.312	13.7708	-97.4487	-69.9323	-15.4512	297.468	-32.9445	-89.8334	-64.18	37.2849	-24.6841
100.312	13.8125	-97.4284	-67.86	-18.371	265.321	-27.8706	-90.2693	-60.5828	36.8354	-29.1231
100.312	13.8542	-97.5939	-68.7118	-13.3417	242.191	-24.3765	-88.3797	-61.5482	27.0494	-39.5918
100.312	13.8958	-97.5122	-66.4168	-13.8847	245.772	-20.6511	-86.7739	-61.554	9.94554	-43.9175
100.312	13.9375	-97.0246	-62.8462	-1.91795	203.025	-7.75624	-84.842	-58.7695	-12.0875	-46.8357
100.312	13.9792	-96.9908	-61.6232	1.20665	195.771	-2.5708	-82.9514	-63.2402	-11.0677	-51.7595
100.312	14.0208	-97.1702	-54.8842	-2.73517	163.962	-9.26617	-80.6617	-61.7368	-22.1531	-53.2567
100.312	14.0625	-97.0246	-51.3545	-2.09537	175.456	-20.8472	-79.564	-59.5824	-33.1332	-48.1196
100.312	14.1042	-97.2505	-52.8748	3.56947	148.865	-19.2173	-77.8043	-60.0002	-42.5422	-45.0689
100.312	14.1458	-97.5384	-52.2252	8.44005	128.219	-23.1142	-73.9527	-65.1831	-45.743	-44.9681
100.312	14.1875	-97.6835	-45.6084	4.55713	120.339	-28.8845	-73.5172	-66.4258	-47.8827	-43.9039
100.312	14.2292	-97.8603	-42.5156	-0.336397	96.1502	-26.1348	-71.8384	-63.815	-53.9459	-45.0728
100.312	14.2708	-97.7045	-40.0542	0.339311	87.4832	-26.5082	-72.7213	-60.3625	-51.7917	-46.8634
100.312	14.3125	-97.7828	-37.1769	-3.00227	71.3812	-22.2808	-65.3922	-63.616	-55.1689	-51.6089
100.312	14.3542	-97.9943	-31.3732	-5.44119	52.2848	-20.2074	-61.6594	-61.9466	-63.6181	-52.0816
100.312	14.3958	-98.0596	-29.3116	-8.84538	58.2339	-21.602	-56.8936	-59.5388	-67.5859	-57.0613
100.312	14.4375	-98.048	-28.6305	-10.4482	71.0395	-27.8857	-50.4412	-56.7933	-70.3181	-61.0408
100.312	14.4792	-97.6807	-26.4836	-12.2571	51.7887	-17.1047	-43.8657	-51.8957	-71.7983	-62.4764
100.312	14.5208	-97.4517	-28.7295	-5.72845	50.7416	-15.4823	-36.6414	-45.4619	-75.6071	-64.6808
100.312	14.5625	-97.1422	-32.0764	-1.7371	61.4105	-17.1524	-33.4603	-38.911	-76.6881	-66.2095
100.312	14.6042	-96.9053	-28.9589	-2.97387	57.0454	-8.59163	-30.4477	-35.7633	-76.1924	-70.5965
100.312	14.6458	-97.1077	-30.0073	-4.38975	54.7481	-8.92861	-30.8785	-36.0894	-76.338	-70.6615
100.312	14.6875	-97.0018	-27.1509	-3.43258	50.6588	-5.38119	-39.3138	-44.1857	-74.3131	-65.6371
100.312	14.7292	-96.9922	-25.9256	-5.13736	55.5676	-7.42754	-44.2983	-50.4562	-73.072	-60.0031
100.312	14.7708	-97.197	-29.5542	-4.92599	56.5514	-9.84497	-48.8572	-57.1425	-71.3372	-52.8008
100.312	14.8125	-97.333	-29.2664	-8.34903	65.4842	-7.47035	-55.0019	-62.8482	-69.7426	-46.886
100.312	14.8542	-97.4708	-29.5211	-12.0408	74.8931	-4.21396	-61.9511	-67.3304	-66.7326	-41.106
100.312	14.8958	-97.2348	-31.3717	-10.509	72.843	-3.25959	-64.3798	-71.6907	-62.8857	-28.0528
100.312	14.9375	-97.611	-29.6953	-11.3799	88.2268	-11.6785	-66.26	-73.3285	-63.5477	-29.6885
100.312	14.9792	-97.3353	-28.294	-6.99949	92.4136	-8.91186	-69.2075	-68.1869	-65.6978	-32.1508
100.312	15.0208	-97.208	-23.2472	-3.95702	97.4262	-10.5627	-67.2442	-63.2174	-69.4831	-41.6602
100.312	15.0625	-96.8084	-25.1686	2.3226	109.805	-10.9064	-68.3048	-56.0914	-70.7385	-45.2421
100.312	15.1042	-95.6442	-19.8483	9.22988	124.409	-8.19237	-68.9873	-51.8528	-71.5719	-43.1093
100.312	15.1458	-95.3823	-20.4012	15.072	174.459	-12.4972	-70.9082	-47.1488	-68.9877	-55.9762
100.312	15.1875	-92.6235	-19.5966	19.5042	185.594	-11.7303	-66.9272	-42.7139	-66.3879	-52.1792
100.312	15.2292	-88.525	-22.6054	21.606	208.496	-13.4514	-63.4122	-36.3991	-63.1558	-46.7388
100.312	15.2708	-82.6399	-24.4937	21.0477	222.058	-3.16594	-65.0813	-26.1334	-58.0363	-43.7309
100.312	15.3125	-74.4333	-17.577	11.8465	272.41	-8.86578	-63.5123	-20.4053	-46.922	-46.9903
100.312	15.3542	-63.6569	-16.3566	12.9451	285.682	-10.2388	-59.5721	-7.94038	-48.1483	-42.4174
100.312	15.3958	-50.2093	-15.4825	25.1537	239.905	-5.00293	-54.7579	-1.2771	-42.2302	-43.5025
100.312	15.4375	-34.7841	-19.6087	16.1225	251.442	-4.74931	-56.9767	17.2056	-35.0974	-36.2336
100.312	15.4792	-11.6868	-23.3981	21.3025	239.863	-12.0224	-51.5886	17.6021	-12.4918	-36.1988
100.312	15.5208	-5.39953	-29.7623	16.8125	222.136	-9.76094	-49.1118	22.9065	-7.78817	-31.2264
100.312	15.5625	-20.3453	-27.8182	2.43851	191.391	-3.79138	-44.5666	14.31	-11.5925	-31.406
100.312	15.6042	-41.4901	-37.9977	-8.19414	176.244	-7.61253	-36.5302	7.05871	-18.665	-27.1249
100.312	15.6458	-48.7956	-41.4591	-12.2787	156.361	-5.42892	-39.6836	14.3114	-24.6298	-20.8579
100.312	15.6875	-59.2699	-35.5634	-17.9602	120.069	-6.39572	-35.5313	3.89325	-28.214	-22.2093
100.312	15.7292	-69.459	-36.0717	-18.8343	83.8389	-9.09581	-33.7913	-10.454	-27.2798	-18.3079
100.312	15.7708	-79.8681	-39.6411	-27.1799	62.3558	-9.72083	-29.6555	-17.39	-33.1673	-19.5389
100.312	15.8125	-83.2401	-33.3628	-29.8403	23.2979	-7.34302	-19.1708	-20.9575	-34.9125	-24.5418
100.312	15.8542	-85.9118	-31.9612	-36.2168	8.86293	-11.9731	-15.0559	-21.8133	-38.1228	-17.5668
100.312	15.8958	-88.645	-30.2137	-42.1975	2.22853	-15.2375	-4.95003	-30.8527	-47.8571	-5.20798
100.312	15.9375	-92.2476	-30.5147	-46.2429	-7.9286	-20.2569	5.2873	-39.3219	-48.9549	-13.3184
100.312	15.9792	-93.3612	-31.6668	-44.9766	-18.7291	-17.8515	7.7773	-38.1578	-50.5701	-19.7263
100.312	16.0208	-91.7016	-30.297	-43.2642	-22.3985	-16.6163	23.1165	-39.8697	-47.5575	-16.4699
100.312	16.0625	-91.8563	-34.713	-44.7451	-27.7333	-6.5357	35.9327	-49.8336	-39.9536	-18.3762
100.312	16.1042	-91.4099	-40.7695	-43.0368	-31.0548	-4.94955	60.6592	-52.0688	-39.5987	-16.4719
100.312	16.1458	-90.5522	-45.9262	-41.0276	-38.9809	9.12192	75.3941	-50.0912	-45.1846	-7.26938
100.312	16.1875	-89.2488	-50.066	-43.0057	-41.3076	24.7131	86.4719	-53.1592	-38.6944	-3.6177
100.312	16.2292	-85.8523	-53.6628	-40.5697	-36.5413	30.4023	106.03	-53.9494	-37.2687	4.30885
100.312	16.2708	-75.9098	-52.2053	-26.8864	-30.989	36.013	140.725	-54.0707	-37.0429	5.51329
100.312	16.3125	-83.6993	-52.9962	-27.8086	-47.9831	28.6072	133.838	-54.1934	-38.2202	8.51502
100.312	16.3542	-83.2387	-50.3458	-29.9492	-49.2311	10.2882	174.547	-55.8216	-37.6471	13.7964
100.312	16.3958	-85.0949	-48.1295	-32.4047	-49.9664	-3.39128	200.821	-57.1569	-30.4763	-1.8484
100.312	16.4375	-85.2726	-46.0291	-33.5376	-54.8762	2.57676	172.221	-55.7105	-36.1962	15.3098
100.312	16.4792	-84.2033	-42.8021	-28.8399	-61.4469	1.38497	172.446	-52.0027	-36.1883	18.9922
100.312	16.5208	-81.193	-40.0582	-20.1993	-63.0329	-3.73311	183.967	-54.3503	-25.3656	14.1952
100.312	16.5625	-75.7244	-37.4113	-13.8285	-60.3981	-8.80002	186.2	-49.9377	-26.8035	18.8306
100.312	16.6042	-68.153	-32.1821	4.04974	-55.6609	3.89862	152.191	-53.202	-31.8818	21.8613
100.312	16.6458	-57.7677	-19.7094	29.9232	-48.583	5.75352	134.168	-54.3587	-41.397	18.8739
100.312	16.6875	-40.0522	-4.34722	38.3229	-36.604	5.5509	130.658	-53.3331	-42.1556	8.74753
100.312	16.7292	-15.4805	11.8955	74.2267	-28.344	11.9378	116.245	-53.7264	-40.5547	-9.13367
100.312	16.7708	19.2274	36.0433	122.511	-19.1728	15.91	100.88	-57.45	-42.5854	-14.3335
100.312	16.8125	66.902	63.2134	200.781	-16.9914	22.4613	104.852	-58.5308	-51.5618	-18.7207
100.312	16.8542	33.3545	63.5863	210.117	-12.5174	15.764	93.3236	-61.3768	-55.5539	-21.7881
100.312	16.8958	-40.2158	46.3946	174.562	-29.8969	13.1912	86.8158	-65.4182	-60.9203	-25.7565
100.312	16.9375	-72.6423	28.6336	116.425	-34.6466	3.32375	74.9402	-68.3754	-62.2734	-30.2753
100.312	16.9792	-85.9519	21.8401	87.3623	-40.9934	-2.4194	47.2212	-66.8876	-68.1779	-31.1044
100.312	17.0208	-92.0613	9.3582	60.1127	-42.451	-14.8068	34.1728	-65.0429	-73.7107	-25.002
100.312	17.0625	-95.9644	4.39858	26.1543	-39.8583	-18.5765	23.7204	-68.7866	-74.2946	-36.9658
100.312	17.1042	-96.9471	7.12544	27.1949	-44.8119	-15.7531	23.7929	-73.9142	-74.5548	-41.3524
100.312	17.1458	-96.3178	14.7734	23.7625	-37.8669	-17.8184	20.977	-72.1772	-74.6352	-40.5375
100.312	17.1875	-96.1967	19.0317	24.6637	-37.0003	-16.096	23.8019	-71.1479	-74.9499	-45.8095
100.312	17.2292	-92.2218	44.6676	75.6572	-34.2115	-8.6411	31.8292	-73.2843	-73.6317	-45.1624
100.312	17.2708	-80.5658	92.1028	167.445	-26.5612	0.803517	48.5865	-75.4153	-76.6384	-40.1243
100.312	17.3125	-52.9344	110.746	352.482	-20.8605	17.1035	62.3203	-76.5999	-76.9747	-39.1049
100.312	17.3542	-31.9155	138.773	409.006	-13.0327	45.046	62.3604	-76.3729	-78.627	-45.8345
100.312	17.3958	-38.1957	142.345	346.549	-13.8411	43.7392	60.0586	-72.7849	-79.3398	-48.7591
100.312	17.4375	-48.9603	130.523	330.488	-17.5484	28.1144	52.4004	-69.0486	-80.8175	-46.19
100.312	17.4792	-66.3215	101.106	284.038	-15.9678	21.5462	70.6278	-70.3267	-82.8294	-50.8905
100.312	17.5208	-68.0058	100.11	260.484	-9.11375	19.0232	76.4507	-66.9753	-82.5265	-59.7335
100.312	17.5625	-69.6388	91.5288	190.563	-3.7867	28.0098	65.6502	-70.901	-78.5591	-57.1398
100.312	17.6042	-71.7896	88.1768	181.059	-15.4987	40.5382	63.7803	-69.042	-80.4271	-54.7416
100.312	17.6458	-77.4437	57.8408	196.485	-19.1182	28.0316	73.2284	-68.2849	-79.9161	-57.8162
100.312	17.6875	-76.5078	76.379	141.481	-17.6565	23.2306	77.8824	-67.5485	-81.4001	-49.3749
100.312	17.7292	-79.5046	74.6103	117.91	-28.9041	34.0308	62.8336	-62.4371	-81.7768	-49.2855
100.312	17.7708	-79.4742	81.9948	107.093	-32.9373	31.3342	78.4128	-65.9173	-82.1536	-43.0221
100.312	17.8125	-77.3981	74.2546	98.92	-32.9625	40.761	75.7733	-68.6996	-78.0003	-42.9097
100.312	17.8542	-76.3061	76.3195	100.628	-37.8637	44.391	101.765	-71.6972	-72.6903	-52.1296
100.312	17.8958	-74.4469	70.3754	96.0565	-41.6524	46.17	82.3849	-67.5408	-70.1796	-49.1918
100.312	17.9375	-68.1021	58.3628	82.9301	-27.4867	25.3347	81.192	-63.9741	-67.3122	-43.2201
100.312	17.9792	-68.6931	63.6576	80.7344	-34.997	37.0817	70.5936	-61.0618	-67.7792	-44.5023
100.312	18.0208	-65.2923	62.7761	78.8493	-31.3784	12.5784	90.574	-60.6334	-68.0948	-35.527
100.312	18.0625	-59.9732	65.8628	74.0902	-31.88	19.9077	63.774	-54.3393	-64.47	-36.1261
100.312	18.1042	-54.4215	70.3962	70.5264	-33.2614	21.1629	67.7249	-50.637	-62.7316	-37.133
100.312	18.1458	-42.6059	71.4765	75.8593	-31.6119	22.4308	59.5428	-50.2698	-58.0798	-31.6553
100.312	18.1875	-31.472	64.3621	71.9846	-23.7258	11.2654	64.4278	-52.4903	-50.3976	-26.2812
100.312	18.2292	-28.0627	70.8789	55.3526	-31.7482	14.1314	64.947	-52.9871	-42.2324	-22.3429
100.312	18.2708	-21.2468	58.0643	69.0295	-38.8061	17.1261	56.4635	-51.2442	-33.9388	-18.3936
100.312	18.3125	-5.55021	70.468	76.2075	-38.5567	13.5943	51.2795	-52.7903	-19.0995	-22.0277
100.312	18.3542	27.2098	60.2537	84.378	-33.9052	16.955	50.1333	-48.9757	-22.9092	-5.68934
100.312	18.3958	37.5236	45.3525	102.621	-33.8233	11.9031	65.4876	-53.4982	-19.7987	2.16568
100.312	18.4375	34.5966	36.5168	105.427	-30.2656	9.97482	75.0621	-54.7987	-13.8865	-8.15913
100.312	18.4792	50.0938	24.193	112.845	-28.9601	15.2176	60.2829	-55.0601	-11.2754	8.54709
100.312	18.5208	60.7416	20.0316	115.067	-31.8041	31.3701	48.3605	-51.9765	-24.7454	29.628
100.312	18.5625	64.3269	21.7485	123.58	-33.0593	38.4857	51.1159	-56.6382	-22.2006	27.7392
100.312	18.6042	57.2998	20.6671	114.682	-31.7127	39.4846	50.0607	-56.8779	-17.6555	19.64
100.312	18.6458	57.7155	26.5262	96.5899	-33.6524	39.0559	64.0883	-55.4796	-20.5003	18.3357
100.312	18.6875	90.9192	37.2781	88.925	-30.9622	39.4034	72.7538	-54.751	-24.8816	30.2615
100.312	18.7292	92.6446	46.651	90.0153	-40.3033	41.3748	102.101	-60.5565	-16.7477	23.43
100.312	18.7708	91.7939	38.4862	90.2264	-36.5779	35.0395	88.9865	-54.7505	-24.8022	32.1924
100.312	18.8125	111.391	37.6924	109.408	-39.2105	34.2971	81.888	-53.5285	-27.4831	46.5073
100.312	18.8542	81.0372	34.7641	92.1829	-39.6752	31.3477	96.4625	-55.2525	-24.4644	32.8494
100.312	18.8958	74.3997	36.1812	82.8578	-46.2869	42.4027	102.12	-55.431	-20.2685	27.4805
100.312	18.9375	49.7432	33.3512	73.7556	-47.0395	34.5907	117.197	-55.8711	-15.8324	12.3887
100.312	18.9792	84.4885	44.472	75.622	-48.3873	40.975	115.116	-55.6497	-6.0832	11.5312
100.312	19.0208	96.6395	56.6362	65.0172	-52.9115	54.3494	113.698	-53.6504	-8.3805	15.3442
100.312	19.0625	92.3151	52.2543	59.979	-52.5674	39.7643	135.163	-52.4821	-11.1724	19.9866
100.312	19.1042	101.989	48.4647	73.1241	-52.9916	39.5132	133.154	-49.973	-13.5158	18.7875
100.312	19.1458	107.898	53.5918	70.3544	-47.4747	36.9501	128.742	-47.4143	-15.7919	9.0513
100.312	19.1875	92.8314	51.811	60.5369	-50.6092	35.0432	151.869	-45.6367	-21.7986	10.7861
100.312	19.2292	84.301	40.2442	74.237	-49.8871	27.0158	139.599	-43.3874	-20.2627	9.5561
100.312	19.2708	72.6866	35.6923	84.2186	-50.0778	20.3696	144.444	-47.8631	-4.03996	-5.99639
100.312	19.3125	67.9372	20.81	97.1698	-51.3693	22.6009	144.464	-46.1437	-11.9011	1.94795
100.312	19.3542	71.1383	27.6703	93.7809	-51.6976	22.737	143.993	-47.8234	-10.2326	2.10111
100.312	19.3958	98.0115	32.1601	88.985	-55.2004	35.2966	140.513	-43.0405	-12.4518	9.05566
100.312	19.4375	90.519	28.5564	88.4474	-54.9699	36.7391	121.703	-38.7567	-13.1134	8.26215
100.312	19.4792	102.176	52.6077	73.6717	-52.486	27.8837	111.684	-32.8727	-17.4408	7.01247
100.312	19.5208	95.2079	39.9044	85.8694	-44.6871	27.0343	103.9	-40.8291	-13.5229	2.39636
100.312	19.5625	77.6248	21.5006	91.2876	-44.6549	36.7472	107.36	-42.4191	-22.3284	8.88668
100.312	19.6042	48.639	14.2827	89.4897	-43.389	31.4976	101.008	-43.2413	-21.0699	2.39063
100.312	19.6458	50.6833	26.4822	68.8916	-40.7878	46.2753	83.8702	-42.5591	-17.5251	-6.5044
100.312	19.6875	48.4806	19.6242	66.0979	-42.1729	46.9995	87.425	-42.6359	-25.5536	9.83168
100.312	19.7292	65.304	33.3457	54.6594	-29.2649	28.7435	76.6142	-37.4977	-29.7708	13.5347
100.312	19.7708	42.6932	27.5126	54.1998	-22.3963	23.9603	74.6981	-33.6027	-37.9175	4.75952
100.312	19.8125	47.5652	32.8423	71.2472	-25.8797	33.4853	67.5032	-43.0763	-29.0359	-3.10553
100.312	19.8542	8.39321	32.8682	80.791	-26.3301	28.1448	52.8363	-41.965	-39.8974	-10.339
100.312	19.8958	-1.90071	45.1382	67.9497	-29.7711	15.8806	72.8563	-46.44	-40.0108	-10.961
100.312	19.9375	-3.18083	34.1558	85.6674	-31.9032	15.0975	64.361	-48.3836	-43.2866	3.07442
100.312	19.9792	-24.0451	41.1493	69.7458	-33.523	6.98174	68.3886	-49.7169	-47.4947	0.26716
100.312	20.0208	-29.5934	35.2693	73.6838	-38.2338	8.68037	61.7628	-45.4485	-51.6503	4.63428
100.312	20.0625	-47.2327	33.815	47.4178	-37.7924	7.21291	56.0581	-45.786	-46.3712	-11.6058
100.312	20.1042	-53.3252	18.6338	50.8832	-32.7508	-7.56439	57.4537	-45.9851	-47.3008	-6.40837
100.312	20.1458	-55.3701	27.6792	48.3946	-36.991	2.2607	37.2976	-46.1525	-52.0582	3.14171
100.312	20.1875	-61.7383	31.5033	55.7972	-40.6324	-9.95438	41.5763	-51.6637	-46.1596	-5.18366
100.312	20.2292	-71.4979	16.8611	55.0575	-40.8787	-17.6836	24.5736	-52.9684	-45.9154	1.99858
100.312	20.2708	-74.5435	17.9788	51.0342	-41.123	-10.7676	4.93292	-54.4947	-40.1457	-4.85584
100.312	20.3125	-73.1801	35.6007	34.2473	-31.9398	-20.5426	-4.18591	-54.675	-32.9421	-6.44988
100.312	20.3542	-76.3201	23.4464	35.5003	-31.0746	-26.1738	-16.3596	-51.797	-34.6622	5.61252
100.312	20.3958	-81.4052	9.75444	23.218	-29.3133	-24.3605	-30.4438	-56.1206	-25.0959	12.4876
100.312	20.4375	-85.6016	7.38768	21.1594	-37.0962	-25.1541	-28.2622	-55.9079	-30.8045	7.39145
100.312	20.4792	-89.0948	11.6595	17.5889	-43.2105	-34.464	-23.7307	-50.5843	-39.2912	-2.46573
100.312	20.5208	-89.962	1.87219	16.6874	-49.0033	-35.4184	-19.89	-45.9473	-40.7075	-0.135342
100.312	20.5625	-88.9371	-5.07882	15.1714	-48.0117	-30.8103	-23.8337	-44.2472	-33.3179	-0.647973
100.312	20.6042	-87.0501	-3.56212	0.900648	-34.8413	-36.455	-19.4434	-43.1989	-29.2481	-0.717098
100.312	20.6458	-84.2265	-2.03537	-8.40783	-26.5147	-41.2487	-10.0313	-46.9156	-18.3895	4.46694
100.312	20.6875	-81.7635	-1.82894	-11.6889	-36.4804	-36.7645	-17.2441	-36.4715	-10.8361	11.717
100.312	20.7292	-81.413	3.06279	-14.2243	-39.0981	-34.288	-10.5806	-39.5513	9.74078	-11.4314
100.312	20.7708	-80.7894	3.73941	-11.5189	-36.0217	-42.1381	-15.5457	-24.9997	-4.35586	-6.6795
100.312	6.6875	-58.984	-49.1768	-20.0665	49.6613	-33.0379	-7.14615	67.0004	-16.4592	-22.2307
100.312	6.72917	-59.0423	-52.1597	-17.9998	60.6076	-34.2481	-12.7037	79.0847	-20.4341	-20.5174
100.312	6.77083	-64.4767	-55.564	-15.447	62.7086	-44.4671	3.31515	79.7104	-23.694	-26.1429
100.312	6.8125	-64.0877	-53.443	-15.5602	64.6111	-44.8748	12.8958	63.6215	-22.4761	-29.7011
100.312	6.85417	-67.4655	-48.5765	-27.1736	65.7733	-42.6901	8.25338	68.4899	-24.1455	-33.9073
100.312	6.89583	-67.8957	-48.9709	-21.3992	61.5262	-37.415	-7.13377	69.2303	-30.4159	-27.5966
100.312	6.9375	-71.4538	-46.0193	-26.5057	63.7752	-37.5378	-13.5899	62.1936	-33.134	-24.9436
100.312	6.97917	-74.5523	-44.7334	-26.3943	54.7672	-38.7485	-1.77557	36.8827	-28.0965	-31.741
100.312	7.02083	-78.5576	-48.4135	-27.5535	60.0496	-42.7712	11.2013	18.5557	-23.2488	-38.0938
100.312	7.0625	-79.6079	-43.8832	-24.3366	29.4099	-28.7439	-2.35019	16.1367	-26.6424	-37.3953
100.312	7.10417	-78.6718	-44.8269	-15.6036	31.3021	-34.2877	-1.28487	9.55372	-25.1344	-34.4322
100.312	7.14583	-80.408	-46.502	-9.1042	14.3866	-30.639	-13.44	20.8004	-27.6644	-32.8618
100.312	7.1875	-80.0747	-49.6333	-5.07862	17.8751	-38.9451	-17.1266	25.4101	-28.088	-22.5171
100.312	7.22917	-80.7225	-47.4025	-11.8052	21.1909	-36.3298	-26.1399	26.2396	-30.2362	-17.2057
100.312	7.27083	-80.8465	-39.4093	-19.0346	29.5396	-47.745	-25.1743	30.2519	-24.1873	-21.9387
100.312	7.3125	-82.9523	-39.1822	-21.4584	37.0468	-54.2789	-35.2354	42.403	-26.6916	-15.756
100.312	7.35417	-79.8418	-28.9526	-11.7529	16.1092	-55.9693	-33.9839	46.9291	-17.101	-21.7878
100.312	7.39583	-81.2145	-41.4838	10.5861	8.27568	-53.2668	-31.0973	40.2409	-25.7767	-20.0098
100.312	7.4375	-81.7198	-31.0485	-11.3225	24.5097	-55.3839	-23.8778	49.6464	-33.8863	-28.5406
100.312	7.52083	-81.8133	-39.2635	-21.0411	44.0522	-61.9494	-21.0429	53.9358	-25.7626	-23.3224
100.312	7.5625	-82.028	-35.6756	-24.633	27.5219	-49.8877	-27.4307	34.0528	-23.7545	-21.7894
100.312	7.60417	-77.8772	-32.1986	-14.1812	26.4624	-49.9671	-24.3489	27.1838	-17.866	-23.9617
100.312	7.64583	-78.841	-38.9986	-9.46986	14.8377	-44.6171	-25.2965	24.0897	-7.88824	-29.4479
100.312	7.6875	-78.4358	-41.8726	-1.83739	1.02685	-44.2705	-11.6556	5.00883	-10.4707	-19.1807
100.312	7.72917	-77.3904	-29.969	-11.4666	14.4137	-51.7384	-11.5026	6.00752	-9.32106	-22.3677
100.312	7.77083	-74.1097	-31.0183	-5.79591	3.39905	-50.3651	-13.3962	3.89555	3.95669	-17.0066
100.312	7.8125	-69.4899	-23.9834	1.03037	-6.10609	-48.2308	-11.4689	2.17935	-0.755905	-8.96449
100.312	7.85417	-65.5665	-17.6999	1.44642	-11.0427	-44.8607	-13.7168	-1.98434	7.01503	-7.09587
100.312	7.89583	-63.0672	-6.48262	-2.47569	-10.4303	-49.1686	-10.4232	-7.85194	13.2291	-4.83543
100.312	7.9375	-66.7992	-14.6493	-0.667188	-16.2052	-52.4381	-11.7388	2.01047	5.49082	3.45309
100.312	7.97917	-60.4368	1.77783	-9.16881	-20.5895	-50.7116	-12.8176	-0.405583	-1.28714	27.5686
100.312	8.02083	-65.387	-0.737823	-12.2702	-22.4687	-48.8975	-4.16336	-8.75934	4.5989	9.68389
100.312	8.0625	-67.6946	-6.46097	9.58181	-30.986	-48.7889	-10.7483	-16.3168	29.2502	-7.62446
100.354	13.5208	-95.9217	-61.1269	-28.2726	287.234	5.90324	-84.5066	-77.9662	1.188	3.25095
100.354	13.5625	-96.4441	-65.3143	-17.2986	260.558	18.9771	-86.5988	-78.9682	6.8691	-4.06437
100.354	13.6042	-96.7189	-69.55	-25.4864	363.673	9.16181	-87.8712	-76.4672	11.2992	-10.0652
100.354	13.6458	-96.4586	-67.3573	-30.6304	359.457	4.0426	-88.0711	-72.0454	11.9141	-12.3357
100.354	13.6875	-96.5514	-70.7415	-22.8143	372.354	-15.5686	-87.0337	-73.2113	28.4841	-14.2041
100.354	13.7292	-96.7195	-70.1464	-22.4435	351.857	-12.2966	-88.5433	-67.3923	26.0664	-24.0854
100.354	13.7708	-97.2024	-70.5635	-20.3877	333.912	-19.4431	-88.1232	-65.7829	24.9175	-32.7255
100.354	13.8125	-97.397	-71.6265	-15.6178	315.135	-18.9072	-88.9038	-58.8149	16.1321	-39.1492
100.354	13.8542	-97.3155	-70.7955	-12.3675	300.376	-18.6569	-85.495	-62.6173	10.1688	-46.0853
100.354	13.8958	-97.38	-68.8441	-7.0513	263.861	-17.1293	-85.3382	-56.8448	-6.13634	-49.481
100.354	13.9375	-97.2245	-66.8641	3.34476	246.359	-8.84277	-83.5288	-55.5805	-23.8095	-53.9488
100.354	13.9792	-97.1395	-62.5438	4.07093	231.703	-15.2315	-81.8034	-57.3925	-22.5497	-56.539
100.354	14.0208	-97.1001	-54.7705	-2.33211	199.754	-16.9193	-80.1754	-60.0724	-23.592	-56.4158
100.354	14.0625	-97.1985	-55.3593	1.36621	190.682	-21.3268	-79.4685	-58.7406	-34.3286	-51.3362
100.354	14.1042	-97.6264	-51.8416	-7.39217	178.879	-21.0206	-77.5408	-63.2673	-37.3504	-53.2496
100.354	14.1458	-97.4794	-45.255	-7.77447	161.348	-24.747	-75.6572	-63.5024	-41.7362	-50.9615
100.354	14.1875	-97.3528	-47.241	3.64292	130.62	-27.7819	-75.6314	-61.5131	-48.4658	-39.86
100.354	14.2292	-97.8311	-42.5902	2.39694	94.9125	-27.2965	-73.3043	-65.1256	-51.4353	-42.4155
100.354	14.2708	-97.9685	-44.9725	1.56616	81.6576	-24.6185	-70.7141	-63.3069	-53.1527	-47.2712
100.354	14.3125	-97.8769	-39.4679	-6.37457	77.6401	-19.5223	-67.4336	-65.5071	-56.4621	-46.4186
100.354	14.3542	-97.975	-31.0281	-4.61537	63.4881	-24.6517	-64.0426	-63.9764	-62.4837	-48.5805
100.354	14.3958	-98.2448	-32.7945	-10.626	61.7169	-22.6956	-59.6055	-58.4685	-67.7633	-56.7788
100.354	14.4375	-97.9813	-28.3864	-9.38174	49.5086	-18.0963	-54.2389	-57.3536	-67.045	-60.5
100.354	14.4792	-97.4588	-22.9369	-12.0002	51.6751	-18.8141	-46.0128	-53.5121	-69.6154	-60.0946
100.354	14.5208	-97.3226	-30.4956	-4.81099	48.1574	-19.1399	-35.8491	-47.4643	-72.8705	-63.0554
100.354	14.5625	-96.9923	-33.5362	-1.27336	63.2405	-20.6836	-32.1767	-39.1106	-75.8974	-64.4334
100.354	14.6042	-96.7388	-33.022	-4.62977	66.3108	-9.84306	-31.4323	-36.0815	-75.7813	-67.9215
100.354	14.6458	-96.8539	-36.3433	-3.35615	64.881	-6.25598	-33.2286	-35.8558	-75.6203	-68.3145
100.354	14.6875	-96.8452	-29.944	-5.91788	63.5288	-6.08474	-41.8747	-44.3868	-72.9965	-64.2954
100.354	14.7292	-96.8835	-31.087	-5.22234	61.7821	-9.19019	-43.9134	-52.8842	-71.2753	-57.2121
100.354	14.7708	-96.7983	-28.695	-4.36889	66.671	-12.4874	-49.1895	-60.2485	-67.6842	-50.6811
100.354	14.8125	-96.8238	-29.4054	-8.12682	67.8583	-7.16316	-54.2985	-65.5857	-63.998	-44.5011
100.354	14.8542	-96.8699	-30.0433	-10.818	76.1311	-5.48898	-59.8347	-70.7819	-60.171	-35.5187
100.354	14.8958	-96.885	-30.0311	-15.6056	83.0133	-9.78518	-64.7573	-72.9986	-58.1944	-19.6857
100.354	14.9375	-96.5892	-24.8075	-15.3032	96.5263	-9.77905	-68.1685	-70.8127	-58.0694	-22.4642
100.354	14.9792	-96.447	-23.7784	-9.14539	92.607	-8.81213	-66.3843	-65.9187	-63.6306	-29.8924
100.354	15.0208	-96.0562	-19.2058	-6.48828	117.461	-16.7545	-64.0965	-60.822	-67.3642	-37.186
100.354	15.0625	-95.6039	-15.9064	-11.74	132.336	-14.0392	-64.314	-51.8927	-69.7884	-42.8201
100.354	15.1042	-93.6388	-9.27317	1.79512	156.906	-17.529	-66.6021	-46.6199	-68.3718	-42.3465
100.354	15.1458	-92.7274	-21.1552	17.7439	173.551	-7.61316	-69.0345	-44.6515	-65.6426	-47.3587
100.354	15.1875	-91.3924	-22.2356	18.3441	190.075	-8.99189	-67.7349	-41.1258	-63.3456	-49.1164
100.354	15.2292	-86.5024	-17.2405	25.7783	198.163	-7.5921	-66.9974	-33.5932	-56.5957	-50.5259
100.354	15.2708	-77.0962	-9.37024	28.9332	210.991	-3.6667	-65.9343	-28.6932	-52.0602	-43.8172
100.354	15.3125	-69.5034	-19.7993	22.0265	273.919	-8.4019	-63.7494	-12.1445	-51.3837	-41.239
100.354	15.3542	-53.3913	-12.1406	16.612	270.821	-6.84023	-59.9806	-6.36232	-45.3315	-35.7188
100.354	15.3958	-44.1405	-7.9382	14.2805	255.065	-3.39109	-57.6611	-1.17555	-42.1229	-36.084
100.354	15.4375	-49.4277	-17.7753	17.1974	246.398	-8.479	-58.2075	7.96607	-32.3253	-45.7894
100.354	15.4792	-19.4654	-19.3223	19.3555	231.447	-14.1814	-53.4452	24.1194	-20.4978	-35.996
100.354	15.5208	-4.92262	-18.3188	19.7988	180.989	-4.18165	-50.7344	21.8319	-20.9623	-23.9278
100.354	15.5625	-33.4642	-23.0624	-2.15998	170.064	-2.79492	-47.0341	9.88592	-13.9778	-32.7495
100.354	15.6042	-48.3818	-31.1299	-7.82004	139.501	-4.10038	-41.799	1.29103	-18.1405	-26.643
100.354	15.6458	-58.3149	-36.0446	-7.33839	107.882	-1.76767	-39.5201	4.75787	-31.4259	-20.7183
100.354	15.6875	-65.1892	-33.903	-16.1342	87.5718	-2.22825	-35.6187	-5.46652	-31.4121	-17.9699
100.354	15.7292	-72.832	-32.9724	-21.7429	71.379	-6.43132	-35.4173	-8.91924	-34.6923	-15.9214
100.354	15.7708	-81.9196	-34.2917	-27.0074	40.1205	-4.93058	-31.634	-14.0101	-40.6545	-18.8869
100.354	15.8125	-87.296	-33.0633	-33.5568	23.1845	-13.8936	-13.597	-27.2977	-41.6639	-26.5113
100.354	15.8542	-89.3312	-33.9004	-37.3636	8.76905	-20.7602	-6.14506	-30.0943	-42.37	-20.9279
100.354	15.8958	-91.7797	-31.0402	-41.4086	-13.4965	-14.2749	-2.67019	-31.8982	-49.545	-17.964
100.354	15.9375	-91.0284	-24.1829	-42.2134	-12.9611	-18.3776	-1.24938	-34.9251	-53.9104	-2.68136
100.354	15.9792	-92.0693	-30.3191	-37.2022	-22.7726	-19.1516	14.9337	-39.6715	-51.8224	-13.1043
100.354	16.0208	-92.3858	-35.0464	-38.6722	-26.9081	-12.8884	27.0381	-43.777	-46.7116	-21.1252
100.354	16.0625	-92.4099	-39.3958	-38.1738	-31.5445	-5.69483	42.328	-45.0535	-49.8604	-19.977
100.354	16.1042	-91.4612	-44.0875	-42.6281	-28.0194	-0.788502	60.1305	-52.0589	-36.5294	-23.5012
100.354	16.1458	-89.9934	-48.2097	-37.7286	-36.3413	5.44089	78.6642	-52.1922	-39.176	-11.0247
100.354	16.1875	-88.0908	-49.243	-40.4444	-35.7981	15.0588	93.2552	-54.1832	-36.5455	-5.07529
100.354	16.2292	-85.6688	-52.1409	-39.2817	-37.6471	22.5239	133.323	-56.8357	-35.6182	-0.441849
100.354	16.2708	-84.2853	-54.5334	-32.1452	-39.8749	21.3084	152.181	-57.1293	-29.0885	-8.90435
100.354	16.3125	-82.7847	-52.2259	-31.2109	-45.8352	18.3072	159.448	-56.932	-33.1298	9.40473
100.354	16.3542	-82.0935	-49.3292	-33.191	-48.0688	4.71335	163.886	-49.1723	-36.1468	13.5764
100.354	16.3958	-83.4888	-46.3722	-29.6682	-56.5419	4.14144	186.209	-51.8544	-34.9393	7.89097
100.354	16.4375	-84.1707	-45.9355	-29.5327	-59.5725	3.41699	176.193	-52.5101	-34.2606	15.2533
100.354	16.4792	-81.3435	-41.242	-23.774	-65.5274	4.86611	179.298	-49.8165	-31.8964	20.7121
100.354	16.5208	-77.8291	-40.0853	-13.9243	-65.0111	-3.07435	189.396	-49.7796	-23.6195	14.1943
100.354	16.5625	-72.7166	-37.3899	-8.92984	-61.1073	-13.8366	172.312	-42.8273	-21.4613	16.7744
100.354	16.6042	-64.1197	-29.277	1.64517	-55.3438	-6.40513	156.158	-45.9768	-26.0858	16.7509
100.354	16.6458	-52.1121	-20.1847	27.3637	-49.5577	3.3486	131.531	-52.7676	-24.5613	9.53446
100.354	16.6875	-29.4957	-4.87456	61.5141	-46.1486	13.2868	108.974	-51.9652	-24.5261	-0.714204
100.354	16.7292	-5.92588	14.5946	94.1954	-35.1737	8.65888	106.746	-54.3509	-29.2548	-10.1154
100.354	16.7708	37.887	33.4018	131.904	-23.3075	11.7958	101.063	-56.4431	-35.0174	-8.65394
100.354	16.8125	95.4485	53.8043	191.414	-17.7339	18.5197	116.592	-55.0728	-41.0083	-22.0888
100.354	16.8542	129.167	75.7524	246.248	-13.1479	30.8455	91.1348	-56.9569	-51.061	-17.6948
100.354	16.8958	14.9309	62.2996	197.867	-22.4892	18.4634	91.3586	-59.9469	-54.7992	-25.2655
100.354	16.9375	-44.9795	44.5794	157.085	-30.4134	6.54262	82.6549	-62.4538	-59.6051	-27.9276
100.354	16.9792	-72.5426	26.8397	117.631	-36.4936	-2.09206	67.5386	-65.6331	-60.5831	-29.5128
100.354	17.0208	-86.5765	18.2555	77.2806	-37.277	-14.6027	50.9047	-64.8261	-67.5587	-30.5792
100.354	17.0625	-92.6631	13.7014	37.218	-42.2335	-10.7622	30.4759	-67.6782	-70.3005	-27.1661
100.354	17.1042	-95.7943	6.29242	13.3986	-39.6966	-12.3928	19.1203	-70.678	-71.4978	-33.6577
100.354	17.1458	-96.2629	8.28834	13.1102	-38.2708	-18.1187	21.7146	-68.318	-71.4494	-45.1723
100.354	17.1875	-95.5999	14.0289	16.5614	-35.475	-18.3303	26.4015	-68.5613	-72.8986	-41.6688
100.354	17.2292	-91.7418	37.455	62.6833	-34.9232	-9.5149	29.6792	-67.6531	-75.1748	-39.7739
100.354	17.2708	-81.6615	68.3752	155.606	-30.3114	2.34735	41.2441	-74.0435	-72.5477	-40.6418
100.354	17.3125	-51.1191	108.34	284.89	-22.9838	15.2778	51.0034	-71.4331	-74.455	-37.692
100.354	17.3542	-11.6038	140.668	403.086	-19.1559	38.9154	63.3356	-73.3242	-75.1683	-39.9144
100.354	17.3958	-30.6255	144.449	364.458	-21.5582	48.9481	63.8951	-73.1298	-78.5172	-44.7216
100.354	17.4375	-47.7994	112.603	365.398	-19.6052	46.0083	60.1978	-73.5516	-78.8459	-49.8552
100.354	17.4792	-54.9301	114.802	280.32	-11.5731	24.3485	60.8286	-68.6317	-79.6023	-51.2429
100.354	17.5208	-63.9051	88.5574	268.519	-11.2884	28.2694	64.298	-69.0359	-79.6566	-55.8913
100.354	17.5625	-66.6359	76.0315	238.091	-11.0541	27.0841	61.2188	-69.4128	-76.9091	-56.4445
100.354	17.6042	-68.1239	86.2553	195.377	-11.9432	23.357	78.542	-68.0237	-78.4759	-56.593
100.354	17.6458	-72.1888	74.2933	186.195	-19.9618	28.7842	76.5237	-70.0315	-79.5726	-49.9462
100.354	17.6875	-75.6721	63.8495	143.642	-20.8321	27.2328	62.2011	-64.6779	-79.0003	-49.7144
100.354	17.7292	-77.4861	91.8443	128.614	-34.6071	30.6168	80.1018	-65.6869	-81.3019	-47.9892
100.354	17.7708	-79.6529	90.8989	107.808	-33.759	32.5685	82.7959	-66.7252	-80.9086	-49.7022
100.354	17.8125	-77.3876	80.5272	100.061	-35.1538	38.4052	87.6939	-68.4873	-79.0644	-43.6643
100.354	17.8542	-75.0877	85.3121	101.634	-34.9889	39.7143	104.017	-70.4943	-75.8889	-49.4258
100.354	17.8958	-75.409	73.4295	74.9746	-33.7877	48.9448	80.4291	-66.7424	-71.825	-51.3982
100.354	17.9375	-74.9615	46.7204	98.4723	-43.1622	52.3741	64.1593	-62.5533	-69.928	-46.2932
100.354	17.9792	-73.3943	49.2777	94.0452	-42.6464	45.0344	84.1135	-66.7925	-67.3073	-44.7577
100.354	18.0208	-66.5145	52.1366	91.6203	-35.125	23.3177	78.1383	-63.8629	-66.9763	-32.463
100.354	18.0625	-63.3059	68.8506	64.0099	-26.352	15.935	63.8517	-54.6786	-68.0632	-34.5661
100.354	18.1042	-61.1378	72.334	61.9728	-29.8299	15.8409	66.2206	-55.8494	-64.3626	-34.5102
100.354	18.1458	-55.1669	69.8987	64.4569	-29.4603	18.5296	58.8474	-53.2808	-63.3113	-29.5164
100.354	18.1875	-48.974	59.8615	65.7084	-27.5914	10.1612	68.1288	-53.3109	-57.4299	-27.736
100.354	18.2292	-37.1915	69.2887	61.0313	-27.8563	1.31004	55.7196	-52.5367	-50.2897	-14.2013
100.354	18.2708	-22.4412	85.9719	47.6591	-30.7714	6.78002	59.3188	-54.1216	-43.3277	-7.7637
100.354	18.3125	-13.4771	71.3767	73.6792	-37.7265	15.6424	52.3139	-53.9664	-33.4053	-13.5517
100.354	18.3542	7.14773	65.5466	80.0439	-38.213	23.3285	58.4056	-52.217	-31.9978	-8.34488
100.354	18.3958	14.5309	49.8139	82.8313	-31.9243	14.9557	66.4396	-53.9589	-30.1423	-0.188579
100.354	18.4375	15.8184	35.9652	91.4299	-31.8391	19.1969	67.1166	-57.5312	-22.0007	-1.06282
100.354	18.4792	38.9424	52.108	77.0321	-29.9361	27.1683	67.0643	-56.7306	-23.0679	4.13227
100.354	18.5208	41.1111	38.737	87.7421	-29.7644	33.4502	44.3952	-51.723	-27.7479	14.759
100.354	18.5625	67.2012	26.1932	123.396	-31.0824	32.8992	41.6443	-52.9194	-27.8676	34.6183
100.354	18.6042	65.2116	35.0165	108.494	-37.1044	42.3391	62.1239	-57.4003	-14.8369	11.4579
100.354	18.6458	85.5582	51.1971	85.7345	-25.2092	31.7023	59.8926	-53.3658	-26.9258	23.1136
100.354	18.6875	70.9697	29.5368	94.4161	-29.7563	32.7351	81.3302	-52.7619	-29.3035	20.2375
100.354	18.7292	112.926	45.9591	87.0627	-30.7303	40.5192	84.4127	-56.426	-15.2258	17.6116
100.354	18.7708	120.032	52.3849	88.9017	-35.8067	43.1159	84.7795	-56.1656	-25.7897	38.4198
100.354	18.8125	119.705	57.7729	89.1956	-36.6807	40.0355	73.4516	-50.2475	-30.6374	38.6772
100.354	18.8542	102.581	43.5457	95.3459	-43.9929	43.8341	90.8548	-52.1352	-24.083	29.3123
100.354	18.8958	65.4609	36.3407	85.1092	-44.9023	40.6067	95.9328	-53.5847	-19.7929	16.017
100.354	18.9375	54.6222	28.865	77.3255	-43.1436	42.2029	92.4802	-53.2079	-16.2376	10.9352
100.354	18.9792	69.2227	45.3235	63.56	-46.3389	45.6065	102.971	-55.5205	-7.71259	9.36263
100.354	19.0208	101.387	56.8686	57.6447	-42.9311	34.9933	105.117	-53.1828	-8.23192	19.9513
100.354	19.0625	98.319	40.3497	76.9538	-51.2502	43.4815	109.386	-51.1879	-7.78539	21.1297
100.354	19.1042	118.5	51.4949	76.9236	-50.2516	32.2044	136.566	-52.8128	-15.1095	30.7998
100.354	19.1458	114.059	49.1816	81.6703	-47.7855	39.0016	115.686	-51.9729	-11.744	19.034
100.354	19.1875	117.401	62.0755	65.8054	-45.5115	30.3905	135.546	-52.2083	-13.3585	16.7457
100.354	19.2292	86.1448	58.1448	58.9312	-45.9569	30.0221	128.866	-48.2594	-15.0376	4.75862
100.354	19.2708	57.5647	34.5853	81.2263	-49.3411	18.1212	146.882	-48.1052	-7.27253	-9.12713
100.354	19.3125	73.0126	36.3535	78.6718	-46.8671	17.1934	148.055	-49.0449	-7.45345	-2.50278
100.354	19.3542	66.799	24.1118	75.6737	-49.7161	22.0966	140.935	-50.8842	-3.35122	8.94887
100.354	19.3958	73.3097	9.63529	100.632	-47.0077	26.7737	113.647	-45.4177	-5.84169	6.81262
100.354	19.4375	88.4579	26.9625	80.2177	-49.6519	34.0117	117.035	-44.5028	-5.19769	6.90429
100.354	19.4792	86.9766	27.7847	76.9993	-50.9495	37.3647	104.895	-37.4494	-6.37512	2.25036
100.354	19.5208	88.6009	32.5665	102.57	-48.2213	27.0757	114.191	-46.7275	-9.26557	3.09622
100.354	19.5625	81.0774	29.6564	69.0065	-37.8253	29.2094	99.0635	-46.3818	-14.4969	12.7129
100.354	19.6042	43.7172	17.6365	58.1257	-36.3107	36.4702	80.3443	-45.948	-16.0191	8.58365
100.354	19.6458	50.8864	33.8313	65.4469	-41.4174	41.5818	75.3788	-45.1595	-17.7284	3.83147
100.354	19.6875	34.2485	23.6549	67.0219	-38.6399	38.8788	73.199	-44.8972	-19.1728	-1.11602
100.354	19.7292	40.3838	30.3888	64.1107	-31.5989	28.389	70.8875	-37.365	-36.0319	9.1085
100.354	19.7708	36.8591	40.2486	65.1444	-27.3528	23.779	54.0849	-39.0427	-27.6086	-3.35659
100.354	19.8125	28.8852	48.4064	66.726	-29.8893	26.2041	52.7034	-45.0756	-33.8781	6.15254
100.354	19.8542	-2.72254	25.6271	76.8593	-36.309	23.75	58.7518	-47.0041	-36.8906	4.62194
100.354	19.8958	-8.24127	42.3333	62.3518	-32.0086	17.4431	62.1967	-51.9788	-37.5065	2.16271
100.354	19.9375	-23.2006	46.4437	63.0584	-35.423	4.31838	71.6766	-58.0909	-33.9732	0.499909
100.354	19.9792	-36.3022	44.1495	51.7891	-25.8181	-10.3759	59.7842	-55.7023	-39.5794	2.38778
100.354	20.0208	-44.3924	35.0377	56.6625	-37.6125	-7.73793	70.2769	-53.1669	-47.5122	9.10023
100.354	20.0625	-53.8568	41.8926	34.2594	-31.4876	-9.20679	40.3859	-49.4524	-44.6701	-0.826227
100.354	20.1042	-60.8363	42.6148	26.5432	-35.1622	-6.82976	37.513	-52.3211	-45.4747	0.486222
100.354	20.1458	-64.2486	21.7718	58.0086	-42.4841	-8.6238	30.6778	-49.2341	-45.5464	-2.13125
100.354	20.1875	-69.678	23.1445	54.7721	-37.246	-16.2479	36.0697	-59.4854	-41.9304	-5.44354
100.354	20.2292	-72.2017	17.5521	61.6911	-39.3275	-18.39	12.3448	-55.5914	-42.1398	2.3215
100.354	20.2708	-77.8244	23.1063	56.4712	-42.8184	-18.3091	5.21567	-59.8289	-32.9209	-13.0743
100.354	20.3125	-79.3252	22.555	34.8268	-37.602	-22.9655	-11.2117	-54.9314	-34.9383	-0.0175772
100.354	20.3542	-81.7643	25.1463	24.2614	-39.901	-23.195	-26.1436	-55.4084	-31.9714	13.3911
100.354	20.3958	-85.7765	3.99478	30.4877	-36.2375	-34.2257	-24.7495	-56.4331	-30.2141	9.23755
100.354	20.4375	-87.7773	2.3063	33.8579	-39.5282	-34.2223	-27.3767	-57.2886	-28.9039	1.74729
100.354	20.4792	-91.7175	-0.615618	15.1477	-44.9914	-34.5714	-30.0645	-53.233	-37.509	-1.61305
100.354	20.5208	-92.661	-14.9247	12.3428	-44.4621	-40.7305	-24.2413	-51.1049	-33.9434	-4.66536
100.354	20.5625	-89.6416	-2.32659	2.6384	-41.7289	-33.7231	-30.2283	-47.5762	-30.5643	5.34142
100.354	20.6042	-87.7943	5.50042	-9.00306	-37.5574	-41.1926	-14.2773	-48.3899	-25.1703	4.58376
100.354	20.6458	-84.9205	-1.47349	-3.24086	-41.2263	-41.6844	-19.5467	-43.5051	-14.8512	19.2455
100.354	20.6875	-82.8709	14.7271	-23.912	-38.769	-35.1302	-26.506	-37.6065	-2.23103	10.1911
100.354	20.7292	-82.5324	2.44961	-17.2123	-37.7741	-40.9944	-12.5255	-35.3301	-2.43763	1.63102
100.354	20.7708	-80.574	2.54532	-16.2252	-34.4529	-45.96	-17.2015	-19.8033	-1.79881	-2.0985
100.354	6.5625	-49.3847	-42.3219	-16.0468	47.34	-25.9064	30.8402	30.4021	-16.9632	-32.4173
100.354	6.60417	-54.9014	-48.7655	-14.1472	41.9051	-22.6747	19.5245	57.7138	-30.1098	-29.0777
100.354	6.64583	-53.0559	-45.7372	-14.795	57.2171	-30.6952	15.0039	53.3529	-25.4169	-29.1554
100.354	6.6875	-59.1811	-49.8102	-26.921	65.1037	-28.7915	10.502	54.7092	-21.4767	-29.4852
100.354	6.72917	-60.9674	-54.4784	-20.0785	76.1625	-37.324	6.15879	77.0128	-26.179	-29.9528
100.354	6.77083	-66.4809	-63.0233	-13.773	77.7427	-43.3443	22.2912	62.3489	-24.2956	-30.5422
100.354	6.8125	-63.9592	-59.0519	-10.127	58.0712	-42.3038	29.3822	62.4744	-26.2279	-30.7566
100.354	6.85417	-63.9548	-50.365	-23.3177	64.7385	-39.3745	15.017	61.5241	-28.2716	-28.8422
100.354	6.89583	-70.2395	-52.4002	-24.0419	65.728	-33.8776	-4.49027	72.0553	-30.6467	-34.0926
100.354	6.9375	-72.9747	-52.2665	-26.1229	72.2356	-32.9161	-5.52763	64.1443	-31.9669	-37.1298
100.354	6.97917	-75.7122	-46.8227	-33.364	54.8698	-28.5885	-1.58587	40.9261	-29.45	-36.6608
100.354	7.02083	-78.8317	-47.5177	-29.719	34.8216	-27.3989	4.61687	37.3558	-32.3019	-39.7291
100.354	7.0625	-80.3708	-51.7592	-18.9416	28.4641	-24.8779	13.3872	16.5652	-31.8667	-42.2372
100.354	7.10417	-78.081	-54.0534	-1.69934	18.2226	-21.9736	-4.49603	19.7116	-31.1242	-33.1896
100.354	7.14583	-77.6194	-52.9274	-6.72854	19.6074	-23.1748	-3.37107	17.8121	-30.965	-29.4125
100.354	7.1875	-74.6849	-45.0623	-8.8989	18.4678	-28.8369	-14.7213	29.3607	-37.5817	-12.8686
100.354	7.22917	-76.3505	-46.9665	-5.30709	20.4434	-32.0166	-25.4778	25.1435	-30.1391	-11.7246
100.354	7.27083	-77.7213	-35.9252	-17.995	31.3338	-43.7318	-24.4911	31.7753	-29.4148	-18.3085
100.354	7.3125	-80.1449	-42.3154	-6.19653	34.1264	-50.7206	-35.8868	43.3054	-23.6704	-20.839
100.354	7.35417	-77.6051	-32.4973	-5.81153	33.1316	-52.3742	-36.2964	43.3046	-17.4259	-26.3049
100.354	7.39583	-76.6045	-32.5176	-1.12187	22.4238	-47.2172	-35.3699	41.227	-20.4082	-25.31
100.354	7.4375	-79.4282	-39.4724	-5.14128	11.0993	-45.1651	-27.4877	53.2087	-34.239	-19.4975
100.354	7.47917	-78.4954	-28.2537	-15.3904	20.2637	-54.7605	-13.0927	55.6872	-40.0747	-19.6952
100.354	7.52083	-80.1198	-30.1543	-19.965	32.2802	-53.8267	-19.2621	53.7405	-36.6021	-26.0098
100.354	7.5625	-80.2088	-41.3205	-13.5393	38.8773	-52.3263	-24.5019	31.7183	-28.7	-16.9033
100.354	7.60417	-77.2205	-27.3303	-20.3163	24.9094	-37.8109	-21.5869	19.5516	-18.4402	-33.7642
100.354	7.64583	-73.9487	-33.0849	-7.97121	21.2802	-47.5644	-14.7566	25.4094	-16.3609	-25.6015
100.354	7.6875	-75.5695	-37.7667	-6.98514	21.9262	-48.9316	-13.0565	21.5042	-9.85931	-28.82
100.354	7.72917	-74.152	-40.1686	5.24141	11.5095	-48.1836	-16.1225	15.4181	-8.30296	-19.9692
100.354	7.77083	-69.9782	-29.5618	1.09916	-3.56372	-45.2998	-13.6513	6.44064	7.56937	-19.165
100.354	7.8125	-66.6854	-23.5678	3.12665	-7.7149	-44.0078	-7.09776	-2.29407	13.4158	-20.5476
100.396	13.5208	-96.4281	-67.6	-15.4209	276.453	10.6195	-85.7132	-77.8887	-5.54091	4.89585
100.396	13.5625	-96.4379	-65.9554	-18.2406	264.108	18.752	-85.6579	-78.5133	-2.71074	-1.28141
100.396	13.6042	-96.6081	-69.379	-23.9599	370.995	3.44634	-85.7982	-76.5068	1.93511	-12.091
100.396	13.6458	-96.3932	-70.6916	-27.9362	424.618	0.391289	-85.8518	-75.3274	12.5655	-17.4812
100.396	13.6875	-96.4526	-73.396	-22.1452	412.859	4.19548	-86.8248	-71.5545	6.52488	-19.7186
100.396	13.7292	-96.6586	-72.8996	-23.4412	410.172	11.6331	-87.1883	-71.0759	9.20962	-30.1258
100.396	13.7708	-96.7018	-71.8782	-26.1156	397.278	4.25902	-87.8806	-62.7843	-1.58227	-31.0252
100.396	13.8125	-97.1844	-72.5972	-19.875	378.282	-0.946029	-87.4019	-59.1271	-4.43881	-44.9908
100.396	13.8542	-97.0105	-71.9149	-17.9416	406.768	-7.46933	-85.6127	-59.0399	-6.34857	-49.8755
100.396	13.8958	-97.2578	-71.0687	-10.7742	356.537	-8.01879	-84.3109	-55.4788	-19.5313	-54.9935
100.396	13.9375	-97.5095	-69.2139	-0.45306	302.45	-12.9575	-82.9715	-52.9758	-28.0783	-59.7191
100.396	13.9792	-97.4925	-65.7404	-4.65713	259.044	-15.9689	-81.3415	-55.4732	-32.128	-54.877
100.396	14.0208	-97.3875	-60.3376	-3.23917	208.962	-14.3864	-80.4985	-59.2853	-33.2453	-51.4461
100.396	14.0625	-97.4928	-58.1092	2.62976	178.29	-14.8738	-79.5259	-61.0857	-34.4502	-52.8634
100.396	14.1042	-97.6466	-54.3939	-4.06491	179.524	-23.656	-76.5687	-63.9498	-40.8523	-49.5502
100.396	14.1458	-97.7201	-53.1594	-6.45566	184.398	-23.2723	-77.276	-65.9183	-39.4184	-49.1784
100.396	14.1875	-97.6605	-47.7619	-7.90479	148.414	-25.4117	-74.5765	-66.4343	-46.2828	-42.745
100.396	14.2292	-97.7152	-46.2842	6.10159	99.7257	-30.5931	-72.2971	-65.7836	-48.5288	-40.7251
100.396	14.2708	-98.0114	-45.7568	4.73114	88.2459	-35.5484	-68.3439	-66.5283	-49.4826	-46.1002
100.396	14.3125	-97.9741	-39.9167	-6.16838	88.5361	-31.9137	-64.9078	-66.0234	-55.3451	-47.4212
100.396	14.3542	-98.0132	-35.9101	-8.61445	81.5654	-29.0488	-65.5421	-62.4946	-62.8692	-45.1259
100.396	14.3958	-98.1106	-33.3998	-5.19482	60.5363	-26.5783	-59.7894	-61.572	-66.0908	-51.5475
100.396	14.4375	-97.8329	-36.9022	-7.86672	77.6763	-25.6355	-57.2727	-62.3882	-63.5463	-51.8417
100.396	14.4792	-97.544	-33.0527	-6.54724	79.9557	-28.8115	-52.886	-55.459	-66.6543	-56.2096
100.396	14.5208	-97.1727	-33.5629	-4.65538	73.6824	-27.3408	-44.4736	-49.7087	-69.533	-58.4277
100.396	14.5625	-97.047	-35.3808	-5.10795	67.0614	-18.4881	-40.1918	-44.6258	-71.7461	-62.205
100.396	14.6042	-97.0026	-37.1984	-8.10673	70.3993	-13.6508	-32.5044	-41.1325	-73.1556	-66.9058
100.396	14.6458	-96.337	-28.285	-11.7648	72.7338	-13.4998	-31.8583	-35.7154	-74.2026	-65.7161
100.396	14.6875	-96.1012	-27.8603	-12.7863	71.5487	-11.0964	-34.1561	-43.3163	-72.9203	-59.7978
100.396	14.7292	-96.1056	-28.0379	-10.1919	64.7537	-11.1704	-43.8616	-47.2098	-69.5239	-54.412
100.396	14.7708	-96.0582	-28.4396	-7.46149	72.4349	-8.83611	-51.5403	-54.0227	-66.2011	-49.7169
100.396	14.8125	-96.1712	-29.5788	-9.94208	80.0295	-14.038	-53.5577	-61.1734	-63.5813	-40.5961
100.396	14.8542	-96.2137	-28.7382	-11.9331	78.3487	-10.4889	-60.7114	-64.7743	-61.5793	-28.9263
100.396	14.8958	-95.9315	-29.0434	-12.7989	89.9405	-14.5019	-60.9795	-67.92	-58.295	-22.4415
100.396	14.9375	-95.6683	-26.4642	-9.69304	98.2766	-18.3762	-61.2753	-67.5259	-58.1461	-23.425
100.396	14.9792	-95.0414	-17.9008	-6.527	107.58	-10.6909	-64.9908	-65.2627	-58.0676	-31.652
100.396	15.0208	-94.7186	-19.3711	-7.18433	129.624	-19.7517	-59.9708	-57.9518	-62.3523	-39.5604
100.396	15.0625	-93.9642	-16.8646	-0.45804	131.681	-19.0902	-61.8898	-49.0228	-63.7609	-44.7338
100.396	15.1042	-92.0853	-18.2343	3.13524	182.424	-18.7732	-66.2372	-42.2529	-62.4822	-44.0691
100.396	15.1458	-89.6283	-19.8279	7.65878	211.461	-18.4511	-65.1935	-42.4066	-57.8445	-44.0152
100.396	15.1875	-87.6139	-19.792	27.8339	210.404	-16.9367	-66.6367	-33.6393	-55.0049	-52.9686
100.396	15.2292	-84.4381	-16.1106	27.046	211.159	-10.8105	-66.2079	-29.7198	-53.5103	-52.3467
100.396	15.2708	-74.7584	-16.9546	28.7108	199.964	-9.21224	-64.6084	-12.2943	-53.3326	-40.1384
100.396	15.3125	-66.1437	-24.1229	30.5564	271.447	-6.66897	-64.315	-15.249	-49.5015	-35.4497
100.396	15.3542	-45.9583	-18.9275	32.3606	258.975	-9.89737	-57.6245	-5.69219	-42.4047	-32.3536
100.396	15.3958	-48.0785	-24.8219	21.4343	270.944	-9.35922	-54.0618	-5.31652	-37.4289	-37.8474
100.396	15.4375	-39.8638	-12.2279	14.7363	240.141	-8.7419	-58.5039	5.93872	-23.6385	-42.6926
100.396	15.4792	-25.4303	-14.435	20.6202	197.997	-4.48603	-51.478	10.2389	-31.923	-30.2901
100.396	15.5208	-13.7053	-18.3079	19.8898	164.596	0.510507	-47.0091	10.9493	-27.66	-22.1026
100.396	15.5625	-41.701	-23.2797	7.2713	132.451	-7.42367	-42.5175	6.82363	-30.3509	-23.0308
100.396	15.6042	-58.7334	-33.1471	3.30423	114.03	-5.53218	-44.1863	0.304704	-22.2053	-32.144
100.396	15.6458	-63.8596	-34.0011	-0.308755	90.3183	-4.48911	-39.2099	-7.74957	-30.9581	-21.9537
100.396	15.6875	-66.3911	-30.4473	-5.96313	69.8149	-2.56809	-36.9106	-4.28175	-36.1305	-19.4769
100.396	15.7292	-76.7119	-34.6871	-17.943	59.3212	-3.49054	-30.1014	-13.0126	-38.9793	-23.8317
100.396	15.7708	-84.2665	-38.4059	-29.9421	52.636	-14.041	-17.4111	-25.9333	-40.6693	-23.4307
100.396	15.8125	-88.2546	-34.6402	-32.2734	19.7026	-10.9063	-12.5932	-31.0554	-42.0065	-28.8095
100.396	15.8542	-90.3603	-38.9498	-34.4124	3.4683	-10.9709	-11.0753	-28.8071	-48.2055	-20.2978
100.396	15.8958	-92.0526	-33.1664	-43.5842	-3.40936	-10.9553	-1.14091	-39.8431	-51.6447	-14.7805
100.396	15.9375	-92.5826	-31.3517	-43.6926	-14.8542	-12.5259	11.2424	-36.7528	-57.6782	-13.4757
100.396	15.9792	-93.8566	-33.4879	-48.5981	-14.2221	-17.2706	19.3801	-34.4672	-54.6814	-28.5784
100.396	16.0208	-94.4523	-40.0563	-46.3023	-28.4787	-11.7994	41.5711	-44.1043	-51.757	-28.4315
100.396	16.0625	-93.2469	-41.1424	-39.1115	-33.2239	-3.32507	49.2961	-46.3754	-49.7278	-27.4749
100.396	16.1042	-91.8961	-43.8929	-39.5068	-34.987	0.850952	68.3774	-47.7576	-46.888	-22.0546
100.396	16.1458	-90.4138	-46.6078	-38.3475	-38.3669	7.12842	94.1751	-51.1692	-43.3238	-17.9245
100.396	16.1875	-88.8911	-50.3822	-36.9161	-35.3379	8.20799	112.502	-52.7345	-44.2554	-9.40665
100.396	16.2292	-87.6612	-53.8876	-33.6369	-39.0258	16.6782	135.733	-55.694	-41.3072	-7.54595
100.396	16.2708	-83.9266	-51.5039	-31.6301	-44.2304	19.6379	147.364	-54.3017	-35.1653	-0.865473
100.396	16.3125	-81.5674	-51.8432	-31.3289	-47.902	16.2631	160.372	-53.0197	-30.847	8.78566
100.396	16.3542	-81.1219	-49.2312	-29.6918	-50.9312	2.16147	167.978	-45.9888	-37.413	16.4648
100.396	16.3958	-82.7026	-46.7356	-29.4805	-55.0477	-2.94644	178.909	-47.8219	-35.7335	12.8591
100.396	16.4375	-82.2265	-44.6795	-25.4446	-61.6663	-1.81671	199.02	-52.2987	-33.3039	20.3534
100.396	16.4792	-79.8555	-42.0377	-19.5372	-64.1259	-0.556034	186.076	-47.0909	-32.2022	17.9858
100.396	16.5208	-74.9292	-40.8295	-15.158	-60.9494	-3.10543	166.948	-41.3084	-21.159	6.84887
100.396	16.5625	-66.0185	-35.9037	-13.3719	-59.8157	-5.12174	145.35	-38.7296	-9.18987	17.5861
100.396	16.6042	-58.9309	-27.2589	-2.32084	-56.3484	-6.40799	137.222	-39.716	-12.3108	12.8214
100.396	16.6458	-43.4497	-14.0188	16.2394	-52.7475	0.579214	139.834	-46.1751	-18.7372	13.4904
100.396	16.6875	-23.1964	0.0160178	64.1923	-52.2023	10.7116	113.118	-47.6611	-26.5485	7.87323
100.396	16.7292	11.2193	15.1032	94.3762	-44.1013	21.5454	104.527	-48.2787	-32.3179	2.19152
[truncated: 58,966 more rows]
