# Supplementary material for: Model-based spatial-temporal mapping of opisthorchiasis in endemic countries of Southeast Asia
Source: eLife. 2021 Jan 12;10:e59755. doi: 10.7554/eLife.59755 (PMC7870142; doi:10.7554/eLife.59755)
Supplement: Figure 6—figure supplement 2—source data 1. [file elife-59755-fig6-figsupp2-data1.xlsx]

## Sheet: Predicted prevalence
Country	Administrative division of level one	Predicted prevalence of 2013
Cambodia	Banteay Meancheay	3.63 (0.31, 27.51)
Cambodia	Battambang	2.49 (0.29, 16.34)
Cambodia	Kampong Speu	0.00 (0.00, 0.09)
Cambodia	Kampong Thom	25.74 (12.05, 41.22)
Cambodia	Kampot	3.10 (0.30, 19.24)
Cambodia	Kandal	0.45 (0.02, 10.56)
Cambodia	Keb	17.08 (8.92, 40.00)
Cambodia	Koh Kong	0.73 (0.17, 4.80)
Cambodia	Kompong Cham	2.40 (0.23, 17.20)
Cambodia	Kompong Chnang	0.00 (0.00, 0.13)
Cambodia	Kratie	10.23 (4.33, 22.91)
Cambodia	Krong Pailin	0.49 (0.02, 10.49)
Cambodia	Mondul Kiri	0.60 (0.02, 17.07)
Cambodia	Otdar Mean Chey	4.41 (0.50, 20.88)
Cambodia	Pailin	6.83 (1.72, 28.46)
Cambodia	Phnom Penh	0.36 (0.01, 8.97)
Cambodia	Pouthisat	2.70 (0.29, 23.26)
Cambodia	Preah Vihear	9.41 (2.74, 27.86)
Cambodia	Prey Veaeng	1.14 (0.20, 7.23)
Cambodia	Ratana Kiri	6.36 (0.90, 36.50)
Cambodia	Siem Reap	3.08 (0.26, 18.58)
Cambodia	Stung Treng	8.22 (3.30, 23.42)
Cambodia	Svay Rieng	0.78 (0.05, 7.50)
Cambodia	Takeo	0.02 (0.00, 0.15)
Cambodia	Tbong Khmum	9.47 (2.12, 42.16)
Laos	Attopu	33.54 (14.19, 62.60)
Laos	Bokeo	1.73 (0.14, 13.72)
Laos	Bolikhamsai	27.01 (17.13, 39.40)
Laos	Champassack	37.44 (30.59, 45.56)
Laos	Huaphanh	1.35 (0.19, 6.56)
Laos	Khammouane	70.24 (58.97, 79.49)
Laos	Louang Namtha	1.67 (0.20, 14.17)
Laos	Louangphrabang	12.48 (7.87, 18.05)
Laos	Oudomsay	0.53 (0.09, 4.38)
Laos	Phongsaly	2.48 (0.50, 15.25)
Laos	Salavane	59.96 (51.85, 67.41)
Laos	Saysomboune	58.99 (39.49, 72.64)
Laos	Sekong	30.02 (19.26, 45.12)
Laos	Svannakhet	63.64 (44.48, 78.30)
Laos	Vientiane	12.35 (3.14, 39.69)
Laos	Vientiane [prefecture]	22.05 (5.65, 45.71)
Laos	Xaignabouri	20.02 (3.30, 57.95)
Laos	Xiangkhoang	1.86 (0.69, 5.26)
Thailand	Amnat Charoen	16.06 (5.41, 40.76)
Thailand	Ang Thong	0.98 (0.24, 4.28)
Thailand	Bangkok Metropolis	0.87 (0.23, 4.20)
Thailand	Bueng Kan	17.05 (12.19, 27.01)
Thailand	Buri Ram	18.52 (6.20, 37.31)
Thailand	Chachoengsao	9.68 (3.68, 22.18)
Thailand	Chai Nat	4.00 (1.20, 11.92)
Thailand	Chaiyaphum	12.33 (6.43, 20.56)
Thailand	Chanthaburi	2.16 (0.47, 13.01)
Thailand	Chiang Mai	11.3 (2.84, 33.01)
Thailand	Chiang Rai	16.67 (4.73, 35.27)
Thailand	Chon Buri	4.97 (0.85, 18.93)
Thailand	Chumphon	2.53 (0.44, 17.92)
Thailand	Kalasin	31.05 (17.61, 51.41)
Thailand	Kamphaeng Phet	10.40 (2.61, 34.43)
Thailand	Kanchanaburi	5.30 (1.58, 26.12)
Thailand	Khon Kaen	27.62 (22.72, 32.96)
Thailand	Krabi	3.25 (0.54, 12.12)
Thailand	Lampang	17.58 (4.87, 48.29)
Thailand	Lamphun	5.58 (1.39, 22.26)
Thailand	Loei	17.92 (7.16, 37.56)
Thailand	Lop Buri	8.92 (2.18, 25.50)
Thailand	Mae Hong Son	7.53 (1.95, 21.46)
Thailand	Maha Sarakham	13.15 (5.50, 35.29)
Thailand	Mukdahan	29.34 (16.93, 47.74)
Thailand	Nakhon Nayok	1.28 (0.21, 7.48)
Thailand	Nakhon Pathom	1.12 (0.20, 8.17)
Thailand	Nakhon Phanom	58.54 (45.81, 70.29)
Thailand	Nakhon Ratchasima	3.69 (1.95, 6.26)
Thailand	Nakhon Sawan	20.42 (6.98, 44.77)
Thailand	Nakhon Si Thammarat	2.89 (0.57, 15.29)
Thailand	Nan	19.57 (5.83, 45.89)
Thailand	Narathiwat	1.87 (0.38, 13.97)
Thailand	Nong Bua Lam Phu	22.45 (8.48, 44.72)
Thailand	Nong Khai	17.87 (11.65, 24.31)
Thailand	Nonthaburi	0.99 (0.26, 4.31)
Thailand	Pathum Thani	1.33 (0.35, 5.63)
Thailand	Pattani	1.62 (0.17, 14.73)
Thailand	Phangnga	1.85 (0.37, 11.99)
Thailand	Phatthalung	1.59 (0.31, 11.10)
Thailand	Phayao	19.84 (6.95, 38.21)
Thailand	Phetchabun	18.25 (8.46, 33.00)
Thailand	Phetchaburi	1.49 (0.32, 12.94)
Thailand	Phichit	11.16 (3.77, 27.37)
Thailand	Phitsanulok	12.39 (3.95, 41.70)
Thailand	Phra Nakhon Si Ayutthaya	0.91 (0.22, 4.18)
Thailand	Phrae	15.24 (5.51, 38.68)
Thailand	Phuket	1.11 (0.19, 9.52)
Thailand	Prachin Buri	11.16 (4.06, 30.45)
Thailand	Prachuap Khiri Khan	4.73 (0.74, 18.97)
Thailand	Ranong	3.47 (0.50, 19.51)
Thailand	Ratchaburi	2.63 (0.42, 15.52)
Thailand	Rayong	1.37 (0.22, 9.55)
Thailand	Roi Et	30.61 (15.45, 51.81)
Thailand	Sa Kaeo	17.65 (8.61, 33.00)
Thailand	Sakon Nakhon	23.32 (15.48, 33.93)
Thailand	Samut Prakan	0.76 (0.16, 4.30)
Thailand	Samut Sakhon	0.67 (0.13, 3.78)
Thailand	Samut Songkhram	0.72 (0.16, 2.96)
Thailand	Saraburi	1.84 (0.52, 8.09)
Thailand	Satun	1.85 (0.31, 10.19)
Thailand	Si Sa Ket	26.54 (13.00, 48.41)
Thailand	Sing Buri	0.80 (0.21, 4.09)
Thailand	Songkhla	3.57 (0.47, 18.88)
Thailand	Sukhothai	4.95 (1.38, 18.87)
Thailand	Suphan Buri	2.73 (0.62, 12.16)
Thailand	Surat Thani	3.04 (0.54, 13.00)
Thailand	Surin	9.54 (7.61, 12.63)
Thailand	Tak	6.44 (1.80, 23.05)
Thailand	Trang	2.58 (0.46, 14.02)
Thailand	Trat	4.90 (0.78, 24.37)
Thailand	Ubon Ratchathani	18.72 (8.18, 39.50)
Thailand	Udon Thani	13.86 (8.55, 21.06)
Thailand	Uthai Thani	11.69 (3.84, 27.13)
Thailand	Uttaradit	3.78 (0.72, 20.53)
Thailand	Yala	1.30 (0.29, 7.44)
Thailand	Yasothon	26.38 (12.50, 44.77)
Vietnam	An Giang	6.98 (0.05, 79.65)
Vietnam	Ba Ria-Vung Tau	0.00 (0.00, 0.00)
Vietnam	Bac Giang	0.00 (0.00, 0.00)
Vietnam	Bac Kan	4.10 (0.15, 37.58)
Vietnam	Bac Lieu	6.58 (0.25, 41.36)
Vietnam	Bac Ninh	0.00 (0.00, 0.00)
Vietnam	Ben Tre	0.45 (0.02, 9.24)
Vietnam	Binh Dinh	0.00 (0.00, 0.00)
Vietnam	Binh Duong	18.79 (4.43, 56.83)
Vietnam	Binh Phuoc	0.00 (0.00, 0.00)
Vietnam	Binh Thuan	0.00 (0.00, 0.00)
Vietnam	Ca Mau	0.00 (0.00, 0.00)
Vietnam	Can Tho	0.00 (0.00, 0.00)
Vietnam	Cao Bang	0.00 (0.00, 0.00)
Vietnam	Da Nang City	0.00 (0.00, 0.00)
Vietnam	Dac Lac	0.00 (0.00, 0.00)
Vietnam	Dac Nong	0.00 (0.00, 0.00)
Vietnam	Dien Bien	0.00 (0.00, 0.00)
Vietnam	Dong Nai	0.00 (0.00, 0.00)
Vietnam	Dong Thap	0.00 (0.00, 0.00)
Vietnam	Gia Lai	11.33 (0.79, 52.01)
Vietnam	Ha Giang	0.00 (0.00, 0.00)
Vietnam	Ha Nam	0.00 (0.00, 0.00)
Vietnam	Ha Noi City	0.00 (0.00, 0.00)
Vietnam	Ha Tinh	0.00 (0.00, 0.00)
Vietnam	Hai Duong	0.00 (0.00, 0.00)
Vietnam	Hai Phong City	0.00 (0.00, 0.00)
Vietnam	Hau Giang	0.00 (0.00, 0.00)
Vietnam	Ho Chi Minh City	0.00 (0.00, 0.00)
Vietnam	Hoa Binh	0.00 (0.00, 0.00)
Vietnam	Hung Yen	0.00 (0.00, 0.00)
Vietnam	Khanh Hoa	0.00 (0.00, 0.00)
Vietnam	Kien Giang	0.00 (0.00, 0.00)
Vietnam	Kon Tum	13.92 (1.74, 56.60)
Vietnam	Lai Chau	0.00 (0.00, 0.00)
Vietnam	Lam Dong	0.00 (0.00, 0.00)
Vietnam	Lang Son	0.00 (0.00, 0.00)
Vietnam	Lao Cai	0.00 (0.00, 0.00)
Vietnam	Long An	0.00 (0.00, 0.00)
Vietnam	Nam Dinh	0.00 (0.00, 0.00)
Vietnam	Nghe An	0.00 (0.00, 0.00)
Vietnam	Ninh Binh	0.00 (0.00, 0.00)
Vietnam	Ninh Thuan	0.00 (0.00, 0.00)
Vietnam	Phu Tho	0.00 (0.00, 0.00)
Vietnam	Phu Yen	11.86 (0.27, 75.09)
Vietnam	Quang Binh	0.00 (0.00, 0.00)
Vietnam	Quang Nam	14.09 (1.18, 59.97)
Vietnam	Quang Ngai	14.03 (0.46, 78.21)
Vietnam	Quang Ninh	0.00 (0.00, 0.00)
Vietnam	Quang Tri	0.00 (0.00, 0.00)
Vietnam	Soc Trang	0.00 (0.00, 0.00)
Vietnam	Son La	0.00 (0.00, 0.00)
Vietnam	Tay Ninh	1.64 (0.05, 27.38)
Vietnam	Thai Binh	0.00 (0.00, 0.00)
Vietnam	Thai Nguyen	0.00 (0.00, 0.00)
Vietnam	Thanh Hoa	5.74 (0.15, 66.97)
Vietnam	Thua Thien - Hue	0.00 (0.00, 0.00)
Vietnam	Tien Giang	0.00 (0.00, 0.00)
Vietnam	Tra Vinh	0.00 (0.00, 0.00)
Vietnam	Tuyen Quang	0.00 (0.00, 0.00)
Vietnam	Vinh Long	0.00 (0.00, 0.00)
Vietnam	Vinh Phuc	0.00 (0.00, 0.00)
Vietnam	Yen Bai	0.00 (0.00, 0.00)
