# Supplementary material for: Model-based spatial-temporal mapping of opisthorchiasis in endemic countries of Southeast Asia
Source: eLife. 2021 Jan 12;10:e59755. doi: 10.7554/eLife.59755 (PMC7870142; doi:10.7554/eLife.59755)
Supplement: Figure 6—figure supplement 3—source data 1. [file elife-59755-fig6-figsupp3-data1.xlsx]

## Sheet: Predicted prevalence
Country	Administrative division of level one	Predicted prevalence of 2008
Cambodia	Banteay Meancheay	1.79 (0.39, 15.52)
Cambodia	Battambang	1.21 (0.28, 8.30)
Cambodia	Kampong Speu	1.35 (0.29, 5.35)
Cambodia	Kampong Thom	34.22 (25.78, 41.89)
Cambodia	Kampot	1.52 (0.47, 7.93)
Cambodia	Kandal	34.36 (8.86, 74.9)
Cambodia	Keb	7.34 (3.34, 14.59)
Cambodia	Koh Kong	17.05 (6.56, 38.51)
Cambodia	Kompong Cham	3.19 (0.83, 16.18)
Cambodia	Kompong Chnang	0.03 (0.00, 0.96)
Cambodia	Kratie	8.06 (4.18, 16.44)
Cambodia	Krong Pailin	0.24 (0.04, 1.86)
Cambodia	Mondul Kiri	1.02 (0.13, 21.15)
Cambodia	Otdar Mean Chey	2.93 (0.92, 14.00)
Cambodia	Pailin	6.34 (1.91, 24.15)
Cambodia	Phnom Penh	13.63 (0.84, 71.23)
Cambodia	Pouthisat	1.57 (0.32, 9.56)
Cambodia	Preah Vihear	8.16 (4.55, 16.16)
Cambodia	Prey Veaeng	4.77 (1.47, 17.91)
Cambodia	Ratana Kiri	5.70 (2.33, 24.51)
Cambodia	Siem Reap	1.53 (0.38, 7.85)
Cambodia	Stung Treng	11.22 (6.37, 20.55)
Cambodia	Svay Rieng	1.41 (0.37, 8.44)
Cambodia	Takeo	29.90 (20.91, 40.97)
Cambodia	Tbong Khmum	23.47 (7.93, 59.17)
Laos	Attopu	43.8 (22.52, 68.52)
Laos	Bokeo	2.34 (0.18, 15.46)
Laos	Bolikhamsai	26.8 (14.32, 47.74)
Laos	Champassack	61.41 (53.7, 67.73)
Laos	Huaphanh	2.45 (0.40, 9.79)
Laos	Khammouane	76.86 (64.65, 84.83)
Laos	Louang Namtha	1.72 (0.15, 14.61)
Laos	Louangphrabang	19.58 (12.43, 30.01)
Laos	Oudomsay	1.29 (0.32, 7.22)
Laos	Phongsaly	18.82 (7.86, 34.94)
Laos	Salavane	78.15 (73.17, 83.39)
Laos	Saysomboune	54.38 (39.19, 68.77)
Laos	Sekong	51.11 (39.00, 63.50)
Laos	Svannakhet	63.03 (49.75, 73.58)
Laos	Vientiane	24.03 (8.99, 54.12)
Laos	Vientiane [prefecture]	16.99 (4.92, 39.37)
Laos	Xaignabouri	27.66 (6.95, 64.92)
Laos	Xiangkhoang	8.07 (3.02, 20.04)
Thailand	Amnat Charoen	23.19 (6.54, 54.53)
Thailand	Ang Thong	3.65 (0.67, 18.31)
Thailand	Bangkok Metropolis	1.29 (0.33, 5.78)
Thailand	Bueng Kan	26.93 (13.42, 47.62)
Thailand	Buri Ram	24.9 (8.67, 47.99)
Thailand	Chachoengsao	6.75 (2.53, 21.93)
Thailand	Chai Nat	7.72 (1.44, 29.61)
Thailand	Chaiyaphum	23.29 (12.23, 37.69)
Thailand	Chanthaburi	1.98 (0.37, 12.99)
Thailand	Chiang Mai	11.99 (5.05, 24.75)
Thailand	Chiang Rai	23.87 (7.70, 42.62)
Thailand	Chon Buri	2.59 (0.66, 11.72)
Thailand	Chumphon	3.14 (0.53, 18.84)
Thailand	Kalasin	34.01 (15.91, 58.28)
Thailand	Kamphaeng Phet	21.42 (6.50, 44.83)
Thailand	Kanchanaburi	10.09 (2.42, 34.76)
Thailand	Khon Kaen	48.66 (43.17, 54.11)
Thailand	Krabi	5.72 (0.77, 21.17)
Thailand	Lampang	26.43 (7.76, 54.41)
Thailand	Lamphun	16.41 (4.73, 40.41)
Thailand	Loei	23.54 (10.66, 43.40)
Thailand	Lop Buri	12.85 (3.51, 33.67)
Thailand	Mae Hong Son	16.02 (4.34, 36.17)
Thailand	Maha Sarakham	18.82 (6.11, 44.52)
Thailand	Mukdahan	37.11 (15.35, 63.73)
Thailand	Nakhon Nayok	2.27 (0.36, 12.38)
Thailand	Nakhon Pathom	1.21 (0.20, 8.03)
Thailand	Nakhon Phanom	67.73 (44.93, 84.95)
Thailand	Nakhon Ratchasima	4.97 (2.34, 11.41)
Thailand	Nakhon Sawan	25.99 (8.05, 52.6)
Thailand	Nakhon Si Thammarat	3.02 (0.60, 15.86)
Thailand	Nan	12.95 (3.11, 36.44)
Thailand	Narathiwat	2.09 (0.24, 13.37)
Thailand	Nong Bua Lam Phu	36.31 (16.78, 63.58)
Thailand	Nong Khai	32.84 (19.08, 48.96)
Thailand	Nonthaburi	1.37 (0.24, 11.05)
Thailand	Pathum Thani	3.12 (0.73, 13.47)
Thailand	Pattani	1.46 (0.17, 15.32)
Thailand	Phangnga	2.10 (0.33, 12.88)
Thailand	Phatthalung	2.06 (0.36, 13.65)
Thailand	Phayao	22.22 (6.76, 43.32)
Thailand	Phetchabun	23.46 (9.64, 43.83)
Thailand	Phetchaburi	1.89 (0.37, 17.18)
Thailand	Phichit	17.12 (5.54, 37.21)
Thailand	Phitsanulok	18.42 (6.49, 49.71)
Thailand	Phra Nakhon Si Ayutthaya	2.51 (0.58, 10.55)
Thailand	Phrae	23.11 (7.95, 53.35)
Thailand	Phuket	1.12 (0.14, 10.78)
Thailand	Prachin Buri	9.43 (3.21, 27.73)
Thailand	Prachuap Khiri Khan	6.52 (0.74, 25.76)
Thailand	Ranong	4.99 (0.42, 29.49)
Thailand	Ratchaburi	2.17 (0.48, 11.22)
Thailand	Rayong	1.56 (0.23, 10.59)
Thailand	Roi Et	31.94 (14.75, 55.87)
Thailand	Sa Kaeo	15.93 (6.61, 30.76)
Thailand	Sakon Nakhon	26.77 (13.89, 47.59)
Thailand	Samut Prakan	0.81 (0.14, 4.55)
Thailand	Samut Sakhon	0.59 (0.10, 3.55)
Thailand	Samut Songkhram	0.66 (0.14, 3.48)
Thailand	Saraburi	4.85 (0.80, 22.12)
Thailand	Satun	2.22 (0.35, 12.54)
Thailand	Si Sa Ket	32.37 (12.93, 54.61)
Thailand	Sing Buri	2.31 (0.59, 9.52)
Thailand	Songkhla	4.51 (0.55, 25.74)
Thailand	Sukhothai	16.13 (4.45, 42.45)
Thailand	Suphan Buri	8.87 (1.38, 29.09)
Thailand	Surat Thani	3.26 (0.60, 16.87)
Thailand	Surin	19.68 (8.88, 34.45)
Thailand	Tak	17.64 (5.59, 45.98)
Thailand	Trang	4.41 (0.46, 24.91)
Thailand	Trat	2.46 (0.39, 15.60)
Thailand	Ubon Ratchathani	19.90 (10.65, 36.01)
Thailand	Udon Thani	25.09 (12.29, 42.72)
Thailand	Uthai Thani	15.52 (3.55, 38.04)
Thailand	Uttaradit	12.31 (3.37, 44.85)
Thailand	Yala	1.33 (0.23, 7.67)
Thailand	Yasothon	30.55 (11.85, 54.93)
Vietnam	An Giang	6.56 (0.09, 73.99)
Vietnam	Ba Ria-Vung Tau	0.00 (0.00, 0.00)
Vietnam	Bac Giang	0.00 (0.00, 0.00)
Vietnam	Bac Kan	3.98 (0.09, 34.79)
Vietnam	Bac Lieu	6.75 (0.36, 38.08)
Vietnam	Bac Ninh	0.00 (0.00, 0.00)
Vietnam	Ben Tre	6.84 (0.21, 56.12)
Vietnam	Binh Dinh	0.00 (0.00, 0.00)
Vietnam	Binh Duong	20.64 (5.25, 55.57)
Vietnam	Binh Phuoc	0.00 (0.00, 0.00)
Vietnam	Binh Thuan	0.00 (0.00, 0.00)
Vietnam	Ca Mau	0.00 (0.00, 0.00)
Vietnam	Can Tho	0.00 (0.00, 0.00)
Vietnam	Cao Bang	0.00 (0.00, 0.00)
Vietnam	Da Nang City	0.00 (0.00, 0.00)
Vietnam	Dac Lac	0.00 (0.00, 0.00)
Vietnam	Dac Nong	0.00 (0.00, 0.00)
Vietnam	Dien Bien	0.00 (0.00, 0.00)
Vietnam	Dong Nai	0.00 (0.00, 0.00)
Vietnam	Dong Thap	0.00 (0.00, 0.00)
Vietnam	Gia Lai	12.40 (0.83, 51.58)
Vietnam	Ha Giang	0.00 (0.00, 0.00)
Vietnam	Ha Nam	0.00 (0.00, 0.00)
Vietnam	Ha Noi City	0.00 (0.00, 0.00)
Vietnam	Ha Tinh	0.00 (0.00, 0.00)
Vietnam	Hai Duong	0.00 (0.00, 0.00)
Vietnam	Hai Phong City	0.00 (0.00, 0.00)
Vietnam	Hau Giang	0.00 (0.00, 0.00)
Vietnam	Ho Chi Minh City	0.00 (0.00, 0.00)
Vietnam	Hoa Binh	0.00 (0.00, 0.00)
Vietnam	Hung Yen	0.00 (0.00, 0.00)
Vietnam	Khanh Hoa	0.00 (0.00, 0.00)
Vietnam	Kien Giang	0.00 (0.00, 0.00)
Vietnam	Kon Tum	17.49 (5.49, 48.22)
Vietnam	Lai Chau	0.00 (0.00, 0.00)
Vietnam	Lam Dong	0.00 (0.00, 0.00)
Vietnam	Lang Son	0.00 (0.00, 0.00)
Vietnam	Lao Cai	0.00 (0.00, 0.00)
Vietnam	Long An	0.00 (0.00, 0.00)
Vietnam	Nam Dinh	0.00 (0.00, 0.00)
Vietnam	Nghe An	0.00 (0.00, 0.00)
Vietnam	Ninh Binh	0.00 (0.00, 0.00)
Vietnam	Ninh Thuan	0.00 (0.00, 0.00)
Vietnam	Phu Tho	0.00 (0.00, 0.00)
Vietnam	Phu Yen	15.92 (0.58, 69.11)
Vietnam	Quang Binh	0.00 (0.00, 0.00)
Vietnam	Quang Nam	15.27 (2.20, 55.30)
Vietnam	Quang Ngai	14.48 (0.48, 78.11)
Vietnam	Quang Ninh	0.00 (0.00, 0.00)
Vietnam	Quang Tri	0.00 (0.00, 0.00)
Vietnam	Soc Trang	0.00 (0.00, 0.00)
Vietnam	Son La	0.00 (0.00, 0.00)
Vietnam	Tay Ninh	2.36 (0.10, 31.39)
Vietnam	Thai Binh	0.00 (0.00, 0.00)
Vietnam	Thai Nguyen	0.00 (0.00, 0.00)
Vietnam	Thanh Hoa	15.28 (0.60, 78.99)
Vietnam	Thua Thien - Hue	0.00 (0.00, 0.00)
Vietnam	Tien Giang	0.00 (0.00, 0.00)
Vietnam	Tra Vinh	0.00 (0.00, 0.00)
Vietnam	Tuyen Quang	0.00 (0.00, 0.00)
Vietnam	Vinh Long	0.00 (0.00, 0.00)
Vietnam	Vinh Phuc	0.00 (0.00, 0.00)
Vietnam	Yen Bai	0.00 (0.00, 0.00)
