# Supplementary material for: Model-based spatial-temporal mapping of opisthorchiasis in endemic countries of Southeast Asia
Source: eLife. 2021 Jan 12;10:e59755. doi: 10.7554/eLife.59755 (PMC7870142; doi:10.7554/eLife.59755)
Supplement: Figure 6—figure supplement 4—source data 1. [file elife-59755-fig6-figsupp4-data1.xlsx]

## Sheet: Predicted prevalence
Country	Administrative division of level one	Predicted prevalence of 2003
Cambodia	Banteay Meancheay	2.45 (0.26, 21.23)
Cambodia	Battambang	2.36 (0.23, 17.68)
Cambodia	Kampong Speu	7.2 (1.01, 32.34)
Cambodia	Kampong Thom	16.8 (3.43, 40.41)
Cambodia	Kampot	0.53 (0.06, 4.10)
Cambodia	Kandal	37.91 (9.66, 74.79)
Cambodia	Keb	2.90 (0.36, 13.42)
Cambodia	Koh Kong	3.51 (0.96, 12.88)
Cambodia	Kompong Cham	5.80 (0.74, 32.00)
Cambodia	Kompong Chnang	0.22 (0.00, 12.4)
Cambodia	Kratie	5.20 (0.56, 23.38)
Cambodia	Krong Pailin	0.72 (0.03, 10.97)
Cambodia	Mondul Kiri	2.82 (0.10, 42.00)
Cambodia	Otdar Mean Chey	3.28 (0.37, 17.43)
Cambodia	Pailin	6.75 (0.61, 30.15)
Cambodia	Phnom Penh	1.59 (0.19, 11.94)
Cambodia	Pouthisat	1.81 (0.13, 21.24)
Cambodia	Preah Vihear	6.41 (2.03, 20.82)
Cambodia	Prey Veaeng	1.67 (0.13, 12.66)
Cambodia	Ratana Kiri	6.08 (0.87, 41.15)
Cambodia	Siem Reap	2.01 (0.17, 14.93)
Cambodia	Stung Treng	8.32 (2.99, 19.27)
Cambodia	Svay Rieng	1.45 (0.07, 16.67)
Cambodia	Takeo	25.32 (9.44, 50.03)
Cambodia	Tbong Khmum	16.01 (1.55, 59.78)
Laos	Attopu	33.01 (16.04, 59.79)
Laos	Bokeo	4.73 (0.62, 20.54)
Laos	Bolikhamsai	16.83 (6.11, 35.56)
Laos	Champassack	50.5 (36.21, 60.88)
Laos	Huaphanh	1.08 (0.16, 6.55)
Laos	Khammouane	61.17 (47.18, 72.25)
Laos	Louang Namtha	1.53 (0.23, 11.68)
Laos	Louangphrabang	11.35 (5.73, 23.18)
Laos	Oudomsay	3.62 (1.15, 13.85)
Laos	Phongsaly	37.03 (21.79, 53.55)
Laos	Salavane	59.94 (52.10, 68.55)
Laos	Saysomboune	54.9 (37.33, 69.67)
Laos	Sekong	73.05 (55.83, 81.38)
Laos	Svannakhet	31.73 (20.54, 43.45)
Laos	Vientiane	14.69 (7.64, 39.94)
Laos	Vientiane [prefecture]	17.73 (8.28, 30.95)
Laos	Xaignabouri	12.88 (4.47, 30.63)
Laos	Xiangkhoang	1.21 (0.26, 6.38)
Thailand	Amnat Charoen	27.03 (9.23, 56.24)
Thailand	Ang Thong	6.51 (1.46, 26.68)
Thailand	Bangkok Metropolis	3.71 (0.85, 15.55)
Thailand	Bueng Kan	24.2 (7.28, 48.36)
Thailand	Buri Ram	30.00 (12.51, 51.44)
Thailand	Chachoengsao	7.96 (2.42, 26.74)
Thailand	Chai Nat	10.55 (2.08, 35.09)
Thailand	Chaiyaphum	26.08 (13.74, 42.96)
Thailand	Chanthaburi	6.57 (1.11, 29.6)
Thailand	Chiang Mai	20.07 (10.84, 32.61)
Thailand	Chiang Rai	32.53 (13.42, 53.98)
Thailand	Chon Buri	5.81 (1.32, 24.50)
Thailand	Chumphon	2.96 (0.53, 20.72)
Thailand	Kalasin	26.87 (9.54, 50.92)
Thailand	Kamphaeng Phet	31.29 (10.51, 57.13)
Thailand	Kanchanaburi	14.74 (4.02, 44.26)
Thailand	Khon Kaen	25.49 (21.75, 30.53)
Thailand	Krabi	3.10 (0.54, 13.94)
Thailand	Lampang	35.33 (16.26, 61.82)
Thailand	Lamphun	27.46 (12.25, 50.18)
Thailand	Loei	26.66 (10.29, 51.52)
Thailand	Lop Buri	15.99 (5.25, 39.82)
Thailand	Mae Hong Son	25.56 (8.58, 48.48)
Thailand	Maha Sarakham	19.13 (4.59, 48.18)
Thailand	Mukdahan	30.33 (10.54, 61.00)
Thailand	Nakhon Nayok	5.87 (0.95, 23.45)
Thailand	Nakhon Pathom	3.50 (0.50, 18.61)
Thailand	Nakhon Phanom	40.87 (21.89, 61.01)
Thailand	Nakhon Ratchasima	15.24 (5.07, 35.14)
Thailand	Nakhon Sawan	27.48 (10.28, 53.24)
Thailand	Nakhon Si Thammarat	2.75 (0.47, 15.74)
Thailand	Nan	23.52 (6.74, 50.69)
Thailand	Narathiwat	1.95 (0.27, 16.10)
Thailand	Nong Bua Lam Phu	30.59 (11.34, 62.84)
Thailand	Nong Khai	48.36 (31.46, 66.44)
Thailand	Nonthaburi	3.40 (0.78, 14.27)
Thailand	Pathum Thani	6.73 (1.55, 23.85)
Thailand	Pattani	1.31 (0.16, 12.50)
Thailand	Phangnga	1.88 (0.32, 11.67)
Thailand	Phatthalung	1.62 (0.25, 10.33)
Thailand	Phayao	32.48 (14.01, 56.87)
Thailand	Phetchabun	27.45 (11.65, 48.26)
Thailand	Phetchaburi	6.52 (1.04, 42.55)
Thailand	Phichit	27.13 (9.26, 56.81)
Thailand	Phitsanulok	28.69 (11.13, 64.13)
Thailand	Phra Nakhon Si Ayutthaya	6.15 (1.12, 24.18)
Thailand	Phrae	35.16 (13.9, 63.03)
Thailand	Phuket	0.95 (0.12, 11.3)
Thailand	Prachin Buri	9.58 (2.73, 26.52)
Thailand	Prachuap Khiri Khan	5.04 (0.68, 20.02)
Thailand	Ranong	3.46 (0.48, 24.16)
Thailand	Ratchaburi	6.21 (1.08, 28.48)
Thailand	Rayong	6.01 (1.10, 27.35)
Thailand	Roi Et	28.21 (11.62, 53.74)
Thailand	Sa Kaeo	13.39 (4.74, 28.49)
Thailand	Sakon Nakhon	20.51 (7.35, 42.73)
Thailand	Samut Prakan	3.25 (0.56, 15.79)
Thailand	Samut Sakhon	2.37 (0.43, 11.30)
Thailand	Samut Songkhram	3.34 (0.65, 15.49)
Thailand	Saraburi	9.55 (2.03, 34.06)
Thailand	Satun	1.89 (0.26, 10.56)
Thailand	Si Sa Ket	25.05 (8.73, 51.79)
Thailand	Sing Buri	5.62 (1.19, 21.19)
Thailand	Songkhla	3.13 (0.52, 19.40)
Thailand	Sukhothai	32.03 (12.29, 60.94)
Thailand	Suphan Buri	12.76 (3.22, 31.99)
Thailand	Surat Thani	3.25 (0.55, 20.08)
Thailand	Surin	26.93 (10.15, 46.80)
Thailand	Tak	28.72 (9.08, 59.91)
Thailand	Trang	2.28 (0.29, 14.06)
Thailand	Trat	6.05 (1.05, 31.20)
Thailand	Ubon Ratchathani	19.62 (12.71, 32.69)
Thailand	Udon Thani	33.46 (15.74, 56.74)
Thailand	Uthai Thani	15.91 (3.87, 41.06)
Thailand	Uttaradit	29.48 (9.34, 65.78)
Thailand	Yala	1.30 (0.23, 6.37)
Thailand	Yasothon	27.06 (7.90, 52.61)
Vietnam	An Giang	3.70 (0.06, 68.91)
Vietnam	Ba Ria-Vung Tau	0.00 (0.00, 0.00)
Vietnam	Bac Giang	0.00 (0.00, 0.00)
Vietnam	Bac Kan	4.16 (0.12, 40.10)
Vietnam	Bac Lieu	7.17 (0.70, 36.09)
Vietnam	Bac Ninh	0.00 (0.00, 0.00)
Vietnam	Ben Tre	7.54 (0.21, 61.06)
Vietnam	Binh Dinh	0.00 (0.00, 0.00)
Vietnam	Binh Duong	18.75 (1.45, 69.28)
Vietnam	Binh Phuoc	0.00 (0.00, 0.00)
Vietnam	Binh Thuan	0.00 (0.00, 0.00)
Vietnam	Ca Mau	0.00 (0.00, 0.00)
Vietnam	Can Tho	0.00 (0.00, 0.00)
Vietnam	Cao Bang	0.00 (0.00, 0.00)
Vietnam	Da Nang City	0.00 (0.00, 0.00)
Vietnam	Dac Lac	0.00 (0.00, 0.00)
Vietnam	Dac Nong	0.00 (0.00, 0.00)
Vietnam	Dien Bien	0.00 (0.00, 0.00)
Vietnam	Dong Nai	0.00 (0.00, 0.00)
Vietnam	Dong Thap	0.00 (0.00, 0.00)
Vietnam	Gia Lai	11.78 (1.16, 51.08)
Vietnam	Ha Giang	0.00 (0.00, 0.00)
Vietnam	Ha Nam	0.00 (0.00, 0.00)
Vietnam	Ha Noi City	0.00 (0.00, 0.00)
Vietnam	Ha Tinh	0.00 (0.00, 0.00)
Vietnam	Hai Duong	0.00 (0.00, 0.00)
Vietnam	Hai Phong City	0.00 (0.00, 0.00)
Vietnam	Hau Giang	0.00 (0.00, 0.00)
Vietnam	Ho Chi Minh City	0.00 (0.00, 0.00)
Vietnam	Hoa Binh	0.00 (0.00, 0.00)
Vietnam	Hung Yen	0.00 (0.00, 0.00)
Vietnam	Khanh Hoa	0.00 (0.00, 0.00)
Vietnam	Kien Giang	0.00 (0.00, 0.00)
Vietnam	Kon Tum	15.97 (2.40, 57.39)
Vietnam	Lai Chau	0.00 (0.00, 0.00)
Vietnam	Lam Dong	0.00 (0.00, 0.00)
Vietnam	Lang Son	0.00 (0.00, 0.00)
Vietnam	Lao Cai	0.00 (0.00, 0.00)
Vietnam	Long An	0.00 (0.00, 0.00)
Vietnam	Nam Dinh	0.00 (0.00, 0.00)
Vietnam	Nghe An	0.00 (0.00, 0.00)
Vietnam	Ninh Binh	0.00 (0.00, 0.00)
Vietnam	Ninh Thuan	0.00 (0.00, 0.00)
Vietnam	Phu Tho	0.00 (0.00, 0.00)
Vietnam	Phu Yen	17.84 (2.82, 60.05)
Vietnam	Quang Binh	0.00 (0.00, 0.00)
Vietnam	Quang Nam	11.95 (1.02, 56.26)
Vietnam	Quang Ngai	14.02 (0.40, 75.22)
Vietnam	Quang Ninh	0.00 (0.00, 0.00)
Vietnam	Quang Tri	0.00 (0.00, 0.00)
Vietnam	Soc Trang	0.00 (0.00, 0.00)
Vietnam	Son La	0.00 (0.00, 0.00)
Vietnam	Tay Ninh	2.31 (0.08, 43.09)
Vietnam	Thai Binh	0.00 (0.00, 0.00)
Vietnam	Thai Nguyen	0.00 (0.00, 0.00)
Vietnam	Thanh Hoa	17.73 (0.67, 81.48)
Vietnam	Thua Thien - Hue	0.00 (0.00, 0.00)
Vietnam	Tien Giang	0.00 (0.00, 0.00)
Vietnam	Tra Vinh	0.00 (0.00, 0.00)
Vietnam	Tuyen Quang	0.00 (0.00, 0.00)
Vietnam	Vinh Long	0.00 (0.00, 0.00)
Vietnam	Vinh Phuc	0.00 (0.00, 0.00)
Vietnam	Yen Bai	0.00 (0.00, 0.00)
