# Supplementary material for: Model-based spatial-temporal mapping of opisthorchiasis in endemic countries of Southeast Asia
Source: eLife. 2021 Jan 12;10:e59755. doi: 10.7554/eLife.59755 (PMC7870142; doi:10.7554/eLife.59755)
Supplement: Figure 6—figure supplement 5—source data 1. [file elife-59755-fig6-figsupp5-data1.xlsx]

## Sheet: Predicted prevalence
Country	Administrative division of level one	Predicted prevalence of 1998
Cambodia	Banteay Meancheay	5.53 (0.19, 38.95)
Cambodia	Battambang	6.25 (0.28, 39.32)
Cambodia	Kampong Speu	4.93 (0.13, 42.79)
Cambodia	Kampong Thom	11.87 (0.51, 54.21)
Cambodia	Kampot	0.79 (0.04, 14.99)
Cambodia	Kandal	18.4 (1.46, 70.86)
Cambodia	Keb	4.11 (0.21, 29.62)
Cambodia	Koh Kong	2.93 (0.62, 13.22)
Cambodia	Kompong Cham	8.18 (0.57, 42.81)
Cambodia	Kompong Chnang	0.48 (0.00, 31.85)
Cambodia	Kratie	5.46 (0.17, 38.23)
Cambodia	Krong Pailin	2.58 (0.04, 52.63)
Cambodia	Mondul Kiri	3.88 (0.05, 64.94)
Cambodia	Otdar Mean Chey	4.51 (0.31, 32.85)
Cambodia	Pailin	8.90 (0.40, 42.82)
Cambodia	Phnom Penh	2.02 (0.49, 10.10)
Cambodia	Pouthisat	3.07 (0.16, 35.84)
Cambodia	Preah Vihear	7.18 (0.75, 38.94)
Cambodia	Prey Veaeng	2.12 (0.09, 28.59)
Cambodia	Ratana Kiri	6.72 (0.45, 52.61)
Cambodia	Siem Reap	4.00 (0.16, 41.79)
Cambodia	Stung Treng	6.61 (1.46, 22.17)
Cambodia	Svay Rieng	2.69 (0.04, 37.63)
Cambodia	Takeo	8.88 (0.60, 43.65)
Cambodia	Tbong Khmum	11.92 (0.31, 66.32)
Laos	Attopu	14.03 (2.58, 51.23)
Laos	Bokeo	5.41 (0.77, 23.13)
Laos	Bolikhamsai	12.41 (3.64, 31.89)
Laos	Champassack	28.31 (17.84, 41.17)
Laos	Huaphanh	1.11 (0.13, 8.09)
Laos	Khammouane	52.51 (39.37, 65.44)
Laos	Louang Namtha	1.76 (0.18, 12.93)
Laos	Louangphrabang	7.41 (1.87, 25.38)
Laos	Oudomsay	5.6 (0.98, 19.87)
Laos	Phongsaly	31.32 (12.17, 51.55)
Laos	Salavane	1.34 (0.22, 6.20)
Laos	Saysomboune	22.10 (6.40, 47.25)
Laos	Sekong	2.01 (0.67, 6.15)
Laos	Svannakhet	4.97 (1.42, 13.72)
Laos	Vientiane	3.67 (0.65, 10.87)
Laos	Vientiane [prefecture]	19.09 (8.57, 35.92)
Laos	Xaignabouri	3.57 (0.56, 14.36)
Laos	Xiangkhoang	0.50 (0.04, 5.02)
Thailand	Amnat Charoen	18.01 (4.01, 49.44)
Thailand	Ang Thong	10.81 (1.63, 45.55)
Thailand	Bangkok Metropolis	15.33 (2.37, 46.34)
Thailand	Bueng Kan	16.57 (3.59, 46.07)
Thailand	Buri Ram	32.14 (11.95, 55.97)
Thailand	Chachoengsao	15.83 (4.55, 43.98)
Thailand	Chai Nat	20.99 (5.29, 50.62)
Thailand	Chaiyaphum	30.84 (15.44, 52.88)
Thailand	Chanthaburi	17.59 (3.27, 52.45)
Thailand	Chiang Mai	27.38 (17.43, 39.14)
Thailand	Chiang Rai	23.31 (10.93, 41.02)
Thailand	Chon Buri	14.47 (2.93, 43.48)
Thailand	Chumphon	3.85 (0.44, 24.19)
Thailand	Kalasin	23.19 (7.29, 50.8)
Thailand	Kamphaeng Phet	17.90 (5.79, 39.74)
Thailand	Kanchanaburi	20.02 (5.27, 53.59)
Thailand	Khon Kaen	33.59 (30.10, 37.30)
Thailand	Krabi	2.93 (0.46, 15.24)
Thailand	Lampang	26.30 (11.80, 51.24)
Thailand	Lamphun	28.73 (10.42, 57.30)
Thailand	Loei	23.88 (7.11, 48.43)
Thailand	Lop Buri	20.22 (4.77, 48.50)
Thailand	Mae Hong Son	23.20 (9.18, 44.38)
Thailand	Maha Sarakham	15.51 (4.01, 44.18)
Thailand	Mukdahan	21.06 (5.21, 52.77)
Thailand	Nakhon Nayok	12.11 (1.92, 49.23)
Thailand	Nakhon Pathom	15.35 (2.37, 46.74)
Thailand	Nakhon Phanom	30.58 (14.43, 54.75)
Thailand	Nakhon Ratchasima	20.98 (7.22, 45.98)
Thailand	Nakhon Sawan	33.33 (17.39, 54.91)
Thailand	Nakhon Si Thammarat	4.06 (0.67, 20.53)
Thailand	Nan	23.02 (6.48, 49.56)
Thailand	Narathiwat	2.99 (0.29, 21.60)
Thailand	Nong Bua Lam Phu	33.68 (11.05, 64.00)
Thailand	Nong Khai	3.62 (0.63, 17.78)
Thailand	Nonthaburi	18.06 (2.16, 58.27)
Thailand	Pathum Thani	17.15 (2.83, 48.50)
Thailand	Pattani	2.06 (0.17, 20.22)
Thailand	Phangnga	2.76 (0.29, 17.83)
Thailand	Phatthalung	2.56 (0.36, 15.36)
Thailand	Phayao	19.71 (8.00, 36.55)
Thailand	Phetchabun	18.79 (7.82, 32.87)
Thailand	Phetchaburi	16.35 (2.17, 60.91)
Thailand	Phichit	16.04 (5.92, 34.55)
Thailand	Phitsanulok	18.41 (6.28, 48.01)
Thailand	Phra Nakhon Si Ayutthaya	13.78 (2.15, 46.97)
Thailand	Phrae	26.05 (12.68, 47.20)
Thailand	Phuket	1.45 (0.14, 19.27)
Thailand	Prachin Buri	17.37 (4.78, 49.58)
Thailand	Prachuap Khiri Khan	5.21 (0.86, 18.67)
Thailand	Ranong	3.73 (0.38, 25.32)
Thailand	Ratchaburi	16.05 (3.15, 59.00)
Thailand	Rayong	14.37 (3.03, 45.87)
Thailand	Roi Et	27.97 (9.65, 54.37)
Thailand	Sa Kaeo	18.17 (5.58, 40.58)
Thailand	Sakon Nakhon	17.05 (4.58, 42.16)
Thailand	Samut Prakan	13.91 (2.30, 48.12)
Thailand	Samut Sakhon	13.44 (1.92, 53.15)
Thailand	Samut Songkhram	14.16 (2.01, 58.03)
Thailand	Saraburi	15.28 (3.65, 50.62)
Thailand	Satun	2.46 (0.26, 17.38)
Thailand	Si Sa Ket	23.66 (6.14, 51.77)
Thailand	Sing Buri	13.4 (2.16, 52.48)
Thailand	Songkhla	3.38 (0.49, 20.00)
Thailand	Sukhothai	27.37 (9.45, 55.47)
Thailand	Suphan Buri	16.87 (3.70, 44.31)
Thailand	Surat Thani	4.37 (0.58, 25.63)
Thailand	Surin	28.13 (7.45, 53.80)
Thailand	Tak	23.72 (7.12, 51.85)
Thailand	Trang	2.38 (0.27, 17.59)
Thailand	Trat	14.21 (2.32, 50.78)
Thailand	Ubon Ratchathani	12.30 (3.18, 37.76)
Thailand	Udon Thani	14.72 (4.19, 35.61)
Thailand	Uthai Thani	21.17 (6.62, 53.36)
Thailand	Uttaradit	23.13 (9.50, 56.41)
Thailand	Yala	1.92 (0.37, 14.52)
Thailand	Yasothon	24.55 (6.14, 53.85)
Vietnam	An Giang	1.69 (0.03, 46.92)
Vietnam	Ba Ria-Vung Tau	0.00 (0.00, 0.00)
Vietnam	Bac Giang	0.00 (0.00, 0.00)
Vietnam	Bac Kan	6.72 (0.26, 42.61)
Vietnam	Bac Lieu	12.14 (4.08, 36.82)
Vietnam	Bac Ninh	0.00 (0.00, 0.00)
Vietnam	Ben Tre	5.21 (0.07, 53.08)
Vietnam	Binh Dinh	0.00 (0.00, 0.00)
Vietnam	Binh Duong	16.41 (0.81, 71.83)
Vietnam	Binh Phuoc	0.00 (0.00, 0.00)
Vietnam	Binh Thuan	0.00 (0.00, 0.00)
Vietnam	Ca Mau	0.00 (0.00, 0.00)
Vietnam	Can Tho	0.00 (0.00, 0.00)
Vietnam	Cao Bang	0.00 (0.00, 0.00)
Vietnam	Da Nang City	0.00 (0.00, 0.00)
Vietnam	Dac Lac	0.00 (0.00, 0.00)
Vietnam	Dac Nong	0.00 (0.00, 0.00)
Vietnam	Dien Bien	0.00 (0.00, 0.00)
Vietnam	Dong Nai	0.00 (0.00, 0.00)
Vietnam	Dong Thap	0.00 (0.00, 0.00)
Vietnam	Gia Lai	12.61 (1.46, 54.79)
Vietnam	Ha Giang	0.00 (0.00, 0.00)
Vietnam	Ha Nam	0.00 (0.00, 0.00)
Vietnam	Ha Noi City	0.00 (0.00, 0.00)
Vietnam	Ha Tinh	0.00 (0.00, 0.00)
Vietnam	Hai Duong	0.00 (0.00, 0.00)
Vietnam	Hai Phong City	0.00 (0.00, 0.00)
Vietnam	Hau Giang	0.00 (0.00, 0.00)
Vietnam	Ho Chi Minh City	0.00 (0.00, 0.00)
Vietnam	Hoa Binh	0.00 (0.00, 0.00)
Vietnam	Hung Yen	0.00 (0.00, 0.00)
Vietnam	Khanh Hoa	0.00 (0.00, 0.00)
Vietnam	Kien Giang	0.00 (0.00, 0.00)
Vietnam	Kon Tum	12.06 (0.73, 61.70)
Vietnam	Lai Chau	0.00 (0.00, 0.00)
Vietnam	Lam Dong	0.00 (0.00, 0.00)
Vietnam	Lang Son	0.00 (0.00, 0.00)
Vietnam	Lao Cai	0.00 (0.00, 0.00)
Vietnam	Long An	0.00 (0.00, 0.00)
Vietnam	Nam Dinh	0.00 (0.00, 0.00)
Vietnam	Nghe An	0.00 (0.00, 0.00)
Vietnam	Ninh Binh	0.00 (0.00, 0.00)
Vietnam	Ninh Thuan	0.00 (0.00, 0.00)
Vietnam	Phu Tho	0.00 (0.00, 0.00)
Vietnam	Phu Yen	22.93 (8.75, 54.21)
Vietnam	Quang Binh	0.00 (0.00, 0.00)
Vietnam	Quang Nam	7.56 (0.46, 51.67)
Vietnam	Quang Ngai	12.21 (0.26, 80.33)
Vietnam	Quang Ninh	0.00 (0.00, 0.00)
Vietnam	Quang Tri	0.00 (0.00, 0.00)
Vietnam	Soc Trang	0.00 (0.00, 0.00)
Vietnam	Son La	0.00 (0.00, 0.00)
Vietnam	Tay Ninh	3.23 (0.08, 58.27)
Vietnam	Thai Binh	0.00 (0.00, 0.00)
Vietnam	Thai Nguyen	0.00 (0.00, 0.00)
Vietnam	Thanh Hoa	7.23 (0.15, 74.98)
Vietnam	Thua Thien - Hue	0.00 (0.00, 0.00)
Vietnam	Tien Giang	0.00 (0.00, 0.00)
Vietnam	Tra Vinh	0.00 (0.00, 0.00)
Vietnam	Tuyen Quang	0.00 (0.00, 0.00)
Vietnam	Vinh Long	0.00 (0.00, 0.00)
Vietnam	Vinh Phuc	0.00 (0.00, 0.00)
Vietnam	Yen Bai	0.00 (0.00, 0.00)
