# Supplementary material for: Model-based spatial-temporal mapping of opisthorchiasis in endemic countries of Southeast Asia
Source: eLife. 2021 Jan 12;10:e59755. doi: 10.7554/eLife.59755 (PMC7870142; doi:10.7554/eLife.59755)
Supplement: Figure 6—figure supplement 6—source data 1. [file elife-59755-fig6-figsupp6-data1.xlsx]

## Sheet: Predicted prevalence
Country	Administrative division of level one	Predicted prevalence of 1993
Cambodia	Banteay Meancheay	7.85 (0.28, 57.14)
Cambodia	Battambang	8.68 (0.48, 53.60)
Cambodia	Kampong Speu	8.54 (0.17, 58.32)
Cambodia	Kampong Thom	14.76 (0.4, 68.91)
Cambodia	Kampot	2.71 (0.05, 39.07)
Cambodia	Kandal	25.88 (1.26, 76.99)
Cambodia	Keb	6.64 (0.26, 47.81)
Cambodia	Koh Kong	13.59 (1.02, 57.21)
Cambodia	Kompong Cham	11.22 (0.49, 51.48)
Cambodia	Kompong Chnang	1.30 (0.00, 58.53)
Cambodia	Kratie	6.33 (0.24, 45.39)
Cambodia	Krong Pailin	4.49 (0.07, 76.50)
Cambodia	Mondul Kiri	5.03 (0.03, 84.10)
Cambodia	Otdar Mean Chey	6.43 (0.46, 44.28)
Cambodia	Pailin	12.58 (0.47, 55.99)
Cambodia	Phnom Penh	13.87 (0.44, 77.88)
Cambodia	Pouthisat	4.74 (0.13, 52.73)
Cambodia	Preah Vihear	9.85 (0.68, 52.13)
Cambodia	Prey Veaeng	6.76 (0.21, 57.6)
Cambodia	Ratana Kiri	7.84 (0.34, 54.92)
Cambodia	Siem Reap	6.82 (0.30, 53.63)
Cambodia	Stung Treng	8.06 (0.56, 47.58)
Cambodia	Svay Rieng	6.27 (0.09, 55.58)
Cambodia	Takeo	14.65 (0.69, 64.10)
Cambodia	Tbong Khmum	12.25 (0.20, 68.77)
Laos	Attopu	9.04 (0.34, 55.70)
Laos	Bokeo	7.09 (0.51, 44.82)
Laos	Bolikhamsai	14.87 (3.40, 44.02)
Laos	Champassack	28.48 (11.57, 50.70)
Laos	Huaphanh	2.65 (0.17, 20.54)
Laos	Khammouane	50.32 (35.94, 62.75)
Laos	Louang Namtha	3.03 (0.18, 29.48)
Laos	Louangphrabang	11.16 (1.45, 44.79)
Laos	Oudomsay	7.42 (0.46, 42.33)
Laos	Phongsaly	23.54 (3.54, 58.03)
Laos	Salavane	0.07 (0.00, 1.22)
Laos	Saysomboune	18.74 (3.98, 49.53)
Laos	Sekong	2.00 (0.23, 10.83)
Laos	Svannakhet	28.42 (11.72, 50.06)
Laos	Vientiane	1.49 (0.05, 10.63)
Laos	Vientiane [prefecture]	28.43 (10.59, 53.32)
Laos	Xaignabouri	7.64 (0.51, 39.79)
Laos	Xiangkhoang	1.73 (0.04, 20.24)
Thailand	Amnat Charoen	22.55 (5.62, 55.99)
Thailand	Ang Thong	12.41 (2.31, 44.81)
Thailand	Bangkok Metropolis	11.53 (1.93, 41.29)
Thailand	Bueng Kan	21.37 (5.16, 48.24)
Thailand	Buri Ram	32.99 (12.27, 54.63)
Thailand	Chachoengsao	16.56 (4.96, 43.80)
Thailand	Chai Nat	22.60 (7.01, 54.65)
Thailand	Chaiyaphum	29.87 (13.91, 51.99)
Thailand	Chanthaburi	19.04 (4.94, 50.79)
Thailand	Chiang Mai	24.16 (15.13, 39.22)
Thailand	Chiang Rai	20.41 (9.36, 37.02)
Thailand	Chon Buri	15.34 (4.19, 38.91)
Thailand	Chumphon	7.51 (1.06, 34.23)
Thailand	Kalasin	29.54 (11.00, 56.37)
Thailand	Kamphaeng Phet	15.06 (3.54, 32.74)
Thailand	Kanchanaburi	21.56 (5.92, 57.71)
Thailand	Khon Kaen	40.4 (35.70, 46.81)
Thailand	Krabi	6.42 (0.93, 23.15)
Thailand	Lampang	22.34 (9.46, 46.72)
Thailand	Lamphun	26.75 (10.39, 59.80)
Thailand	Loei	27.65 (11.42, 53.43)
Thailand	Lop Buri	21.77 (6.55, 47.16)
Thailand	Mae Hong Son	21.96 (8.34, 42.60)
Thailand	Maha Sarakham	8.61 (2.17, 28.78)
Thailand	Mukdahan	28.59 (8.36, 57.27)
Thailand	Nakhon Nayok	13.56 (2.18, 47.32)
Thailand	Nakhon Pathom	17.27 (2.93, 53.17)
Thailand	Nakhon Phanom	33.25 (15.74, 57.23)
Thailand	Nakhon Ratchasima	22.63 (8.53, 48.08)
Thailand	Nakhon Sawan	34.14 (19.47, 52.92)
Thailand	Nakhon Si Thammarat	7.94 (1.27, 28.18)
Thailand	Nan	21.95 (7.43, 45.73)
Thailand	Narathiwat	6.17 (0.85, 29.89)
Thailand	Nong Bua Lam Phu	39.32 (14.21, 69.91)
Thailand	Nong Khai	4.78 (0.65, 18.18)
Thailand	Nonthaburi	16.83 (2.73, 49.18)
Thailand	Pathum Thani	16.82 (3.33, 46.11)
Thailand	Pattani	4.87 (0.36, 33.37)
Thailand	Phangnga	5.94 (0.97, 25.52)
Thailand	Phatthalung	5.79 (0.74, 30.54)
Thailand	Phayao	16.07 (5.90, 32.80)
Thailand	Phetchabun	16.60 (6.98, 34.49)
Thailand	Phetchaburi	17.83 (2.95, 59.35)
Thailand	Phichit	15.65 (5.23, 33.97)
Thailand	Phitsanulok	18.46 (5.96, 48.02)
Thailand	Phra Nakhon Si Ayutthaya	15.95 (3.38, 49.25)
Thailand	Phrae	23.28 (11.40, 41.76)
Thailand	Phuket	3.36 (0.36, 26.83)
Thailand	Prachin Buri	20.88 (8.85, 51.03)
Thailand	Prachuap Khiri Khan	8.28 (1.55, 26.41)
Thailand	Ranong	8.01 (1.09, 34.34)
Thailand	Ratchaburi	17.5 (3.80, 58.51)
Thailand	Rayong	15.39 (3.00, 46.98)
Thailand	Roi Et	27.68 (10.60, 52.83)
Thailand	Sa Kaeo	20.38 (7.08, 43.27)
Thailand	Sakon Nakhon	21.83 (7.32, 46.04)
Thailand	Samut Prakan	11.90 (2.29, 40.87)
Thailand	Samut Sakhon	13.61 (2.69, 48.50)
Thailand	Samut Songkhram	14.22 (2.34, 52.42)
Thailand	Saraburi	16.60 (3.79, 46.09)
Thailand	Satun	5.14 (0.52, 24.22)
Thailand	Si Sa Ket	29.76 (8.95, 54.89)
Thailand	Sing Buri	14.99 (3.10, 49.54)
Thailand	Songkhla	4.47 (0.68, 22.69)
Thailand	Sukhothai	25.15 (10.20, 50.66)
Thailand	Suphan Buri	17.32 (4.73, 46.20)
Thailand	Surat Thani	8.09 (1.74, 35.35)
Thailand	Surin	31.71 (12.97, 55.87)
Thailand	Tak	21.14 (7.51, 51.58)
Thailand	Trang	5.50 (0.63, 29.45)
Thailand	Trat	16.25 (3.07, 49.73)
Thailand	Ubon Ratchathani	16.65 (3.31, 42.86)
Thailand	Udon Thani	21.95 (8.02, 42.79)
Thailand	Uthai Thani	24.26 (6.92, 58.09)
Thailand	Uttaradit	21.25 (8.50, 52.20)
Thailand	Yala	4.46 (0.97, 23.22)
Thailand	Yasothon	29.22 (9.56, 58.56)
Vietnam	An Giang	0.69 (0.09, 5.51)
Vietnam	Ba Ria-Vung Tau	0.00 (0.00, 0.00)
Vietnam	Bac Giang	0.00 (0.00, 0.00)
Vietnam	Bac Kan	7.97 (0.36, 49.21)
Vietnam	Bac Lieu	18.37 (9.42, 42.87)
Vietnam	Bac Ninh	0.00 (0.00, 0.00)
Vietnam	Ben Tre	7.50 (0.13, 65.92)
Vietnam	Binh Dinh	0.00 (0.00, 0.00)
Vietnam	Binh Duong	16.96 (0.69, 75.25)
Vietnam	Binh Phuoc	0.00 (0.00, 0.00)
Vietnam	Binh Thuan	0.00 (0.00, 0.00)
Vietnam	Ca Mau	0.00 (0.00, 0.00)
Vietnam	Can Tho	0.00 (0.00, 0.00)
Vietnam	Cao Bang	0.00 (0.00, 0.00)
Vietnam	Da Nang City	0.00 (0.00, 0.00)
Vietnam	Dac Lac	0.00 (0.00, 0.00)
Vietnam	Dac Nong	0.00 (0.00, 0.00)
Vietnam	Dien Bien	0.00 (0.00, 0.00)
Vietnam	Dong Nai	0.00 (0.00, 0.00)
Vietnam	Dong Thap	0.00 (0.00, 0.00)
Vietnam	Gia Lai	14.63 (1.66, 57.89)
Vietnam	Ha Giang	0.00 (0.00, 0.00)
Vietnam	Ha Nam	0.00 (0.00, 0.00)
Vietnam	Ha Noi City	0.00 (0.00, 0.00)
Vietnam	Ha Tinh	0.00 (0.00, 0.00)
Vietnam	Hai Duong	0.00 (0.00, 0.00)
Vietnam	Hai Phong City	0.00 (0.00, 0.00)
Vietnam	Hau Giang	0.00 (0.00, 0.00)
Vietnam	Ho Chi Minh City	0.00 (0.00, 0.00)
Vietnam	Hoa Binh	0.00 (0.00, 0.00)
Vietnam	Hung Yen	0.00 (0.00, 0.00)
Vietnam	Khanh Hoa	0.00 (0.00, 0.00)
Vietnam	Kien Giang	0.00 (0.00, 0.00)
Vietnam	Kon Tum	9.68 (0.28, 60.24)
Vietnam	Lai Chau	0.00 (0.00, 0.00)
Vietnam	Lam Dong	0.00 (0.00, 0.00)
Vietnam	Lang Son	0.00 (0.00, 0.00)
Vietnam	Lao Cai	0.00 (0.00, 0.00)
Vietnam	Long An	0.00 (0.00, 0.00)
Vietnam	Nam Dinh	0.00 (0.00, 0.00)
Vietnam	Nghe An	0.00 (0.00, 0.00)
Vietnam	Ninh Binh	0.00 (0.00, 0.00)
Vietnam	Ninh Thuan	0.00 (0.00, 0.00)
Vietnam	Phu Tho	0.00 (0.00, 0.00)
Vietnam	Phu Yen	41.77 (20.80, 66.10)
Vietnam	Quang Binh	0.00 (0.00, 0.00)
Vietnam	Quang Nam	4.31 (0.27, 38.54)
Vietnam	Quang Ngai	9.25 (0.18, 78.27)
Vietnam	Quang Ninh	0.00 (0.00, 0.00)
Vietnam	Quang Tri	0.00 (0.00, 0.00)
Vietnam	Soc Trang	0.00 (0.00, 0.00)
Vietnam	Son La	0.00 (0.00, 0.00)
Vietnam	Tay Ninh	5.83 (0.09, 65.39)
Vietnam	Thai Binh	0.00 (0.00, 0.00)
Vietnam	Thai Nguyen	0.00 (0.00, 0.00)
Vietnam	Thanh Hoa	4.09 (0.04, 63.19)
Vietnam	Thua Thien - Hue	0.00 (0.00, 0.00)
Vietnam	Tien Giang	0.00 (0.00, 0.00)
Vietnam	Tra Vinh	0.00 (0.00, 0.00)
Vietnam	Tuyen Quang	0.00 (0.00, 0.00)
Vietnam	Vinh Long	0.00 (0.00, 0.00)
Vietnam	Vinh Phuc	0.00 (0.00, 0.00)
Vietnam	Yen Bai	0.00 (0.00, 0.00)
