# Supplementary material for: Model-based spatial-temporal mapping of opisthorchiasis in endemic countries of Southeast Asia
Source: eLife. 2021 Jan 12;10:e59755. doi: 10.7554/eLife.59755 (PMC7870142; doi:10.7554/eLife.59755)
Supplement: Figure 6—figure supplement 7—source data 1. [file elife-59755-fig6-figsupp7-data1.xlsx]

## Sheet: Predicted prevalence
Country	Administrative division of level one	Predicted prevalence of 1988
Cambodia	Banteay Meancheay	8.75 (0.36, 60.30)
Cambodia	Battambang	10.73 (0.52, 56.45)
Cambodia	Kampong Speu	8.75 (0.13, 64.58)
Cambodia	Kampong Thom	14.16 (0.24, 67.80)
Cambodia	Kampot	3.78 (0.06, 52.75)
Cambodia	Kandal	19.84 (0.61, 82.17)
Cambodia	Keb	7.49 (0.35, 50.73)
Cambodia	Koh Kong	12.73 (0.41, 69.95)
Cambodia	Kompong Cham	13.10 (0.63, 56.48)
Cambodia	Kompong Chnang	2.14 (0.01, 77.70)
Cambodia	Kratie	7.90 (0.31, 55.98)
Cambodia	Krong Pailin	5.43 (0.12, 81.99)
Cambodia	Mondul Kiri	5.16 (0.04, 79.92)
Cambodia	Otdar Mean Chey	7.44 (0.49, 49.61)
Cambodia	Pailin	16.17 (0.99, 65.93)
Cambodia	Phnom Penh	10.02 (0.07, 92.75)
Cambodia	Pouthisat	6.16 (0.19, 51.39)
Cambodia	Preah Vihear	11.77 (0.66, 56.30)
Cambodia	Prey Veaeng	8.03 (0.16, 65.49)
Cambodia	Ratana Kiri	7.84 (0.40, 62.91)
Cambodia	Siem Reap	9.61 (0.40, 58.51)
Cambodia	Stung Treng	8.51 (0.34, 58.99)
Cambodia	Svay Rieng	6.97 (0.07, 69.87)
Cambodia	Takeo	15.21 (0.37, 75.58)
Cambodia	Tbong Khmum	12.43 (0.20, 73.25)
Laos	Attopu	9.36 (0.35, 66.85)
Laos	Bokeo	10.94 (0.75, 56.29)
Laos	Bolikhamsai	20.43 (4.29, 48.20)
Laos	Champassack	29.60 (5.40, 61.24)
Laos	Huaphanh	4.34 (0.22, 28.21)
Laos	Khammouane	43.67 (17.97, 73.14)
Laos	Louang Namtha	5.07 (0.17, 41.83)
Laos	Louangphrabang	14.36 (1.35, 54.00)
Laos	Oudomsay	8.99 (0.51, 52.67)
Laos	Phongsaly	18.03 (1.43, 59.85)
Laos	Salavane	0.53 (0.02, 5.57)
Laos	Saysomboune	23.02 (4.78, 62.21)
Laos	Sekong	42.27 (10.13, 86.16)
Laos	Svannakhet	79.1 (66.25, 87.77)
Laos	Vientiane	2.26 (0.08, 22.00)
Laos	Vientiane [prefecture]	38.7 (13.47, 68.96)
Laos	Xaignabouri	22.8 (2.83, 64.66)
Laos	Xiangkhoang	4.57 (0.14, 38.67)
Thailand	Amnat Charoen	31.76 (6.67, 65.81)
Thailand	Ang Thong	8.61 (1.25, 34.87)
Thailand	Bangkok Metropolis	2.19 (0.60, 8.36)
Thailand	Bueng Kan	33.42 (8.50, 65.40)
Thailand	Buri Ram	32.52 (13.04, 55.24)
Thailand	Chachoengsao	10.49 (2.62, 30.58)
Thailand	Chai Nat	12.62 (2.12, 41.95)
Thailand	Chaiyaphum	22.62 (8.58, 50.34)
Thailand	Chanthaburi	19.11 (4.68, 48.71)
Thailand	Chiang Mai	23.53 (14.53, 41.84)
Thailand	Chiang Rai	26.38 (9.86, 51.37)
Thailand	Chon Buri	11.65 (2.52, 38.28)
Thailand	Chumphon	9.86 (1.15, 34.25)
Thailand	Kalasin	37.73 (13.56, 62.36)
Thailand	Kamphaeng Phet	19.52 (4.31, 46.94)
Thailand	Kanchanaburi	19.93 (4.88, 57.90)
Thailand	Khon Kaen	19.38 (10.62, 29.73)
Thailand	Krabi	8.71 (1.13, 31.82)
Thailand	Lampang	27.63 (10.04, 55.52)
Thailand	Lamphun	26.61 (8.10, 62.47)
Thailand	Loei	38.36 (16.96, 64.70)
Thailand	Lop Buri	15.21 (3.09, 45.21)
Thailand	Mae Hong Son	25.76 (8.13, 49.53)
Thailand	Maha Sarakham	8.58 (2.01, 27.98)
Thailand	Mukdahan	39.64 (11.37, 70.48)
Thailand	Nakhon Nayok	8.23 (1.01, 37.83)
Thailand	Nakhon Pathom	9.17 (1.43, 33.77)
Thailand	Nakhon Phanom	36.95 (16.49, 66.22)
Thailand	Nakhon Ratchasima	19.27 (11.7, 35.49)
Thailand	Nakhon Sawan	24.11 (7.47, 51.41)
Thailand	Nakhon Si Thammarat	9.52 (1.53, 34.3)
Thailand	Nan	29.94 (9.17, 59.89)
Thailand	Narathiwat	8.34 (1.05, 36.11)
Thailand	Nong Bua Lam Phu	27.55 (6.46, 57.67)
Thailand	Nong Khai	38.37 (12.84, 69.79)
Thailand	Nonthaburi	3.51 (0.76, 14.90)
Thailand	Pathum Thani	5.74 (0.94, 23.79)
Thailand	Pattani	5.13 (0.47, 33.97)
Thailand	Phangnga	7.81 (1.37, 31.43)
Thailand	Phatthalung	6.13 (0.71, 31.03)
Thailand	Phayao	26.27 (8.27, 56.26)
Thailand	Phetchabun	21.64 (5.97, 46.43)
Thailand	Phetchaburi	14.77 (2.80, 59.05)
Thailand	Phichit	20.86 (4.76, 49.53)
Thailand	Phitsanulok	25.29 (7.48, 59.93)
Thailand	Phra Nakhon Si Ayutthaya	10.01 (1.82, 36.33)
Thailand	Phrae	28.81 (9.05, 63.44)
Thailand	Phuket	5.35 (0.51, 32.93)
Thailand	Prachin Buri	15.4 (4.66, 39.21)
Thailand	Prachuap Khiri Khan	10.79 (1.94, 30.96)
Thailand	Ranong	9.48 (1.24, 36.50)
Thailand	Ratchaburi	14.73 (2.16, 46.75)
Thailand	Rayong	12.78 (2.33, 43.75)
Thailand	Roi Et	30.06 (10.50, 58.54)
Thailand	Sa Kaeo	17.09 (4.27, 39.81)
Thailand	Sakon Nakhon	30.58 (10.73, 58.89)
Thailand	Samut Prakan	2.64 (0.38, 14.75)
Thailand	Samut Sakhon	5.89 (0.83, 28.84)
Thailand	Samut Songkhram	9.32 (1.04, 36.17)
Thailand	Saraburi	11.42 (2.14, 42.6)
Thailand	Satun	5.14 (0.59, 24.78)
Thailand	Si Sa Ket	32.84 (11.30, 61.00)
Thailand	Sing Buri	8.44 (1.30, 39.90)
Thailand	Songkhla	3.49 (0.76, 17.62)
Thailand	Sukhothai	29.63 (9.02, 61.30)
Thailand	Suphan Buri	14.65 (2.95, 40.14)
Thailand	Surat Thani	10.83 (2.09, 38.48)
Thailand	Surin	35.42 (12.71, 60.17)
Thailand	Tak	25.51 (8.28, 58.76)
Thailand	Trang	6.48 (1.01, 33.41)
Thailand	Trat	16.3 (2.59, 53.74)
Thailand	Ubon Ratchathani	22.13 (10.18, 45.34)
Thailand	Udon Thani	36.1 (15.79, 64.45)
Thailand	Uthai Thani	16.82 (3.51, 48.53)
Thailand	Uttaradit	26.39 (9.02, 62.22)
Thailand	Yala	5.62 (0.84, 27.45)
Thailand	Yasothon	34.57 (12.53, 62.00)
Vietnam	An Giang	0.72 (0.06, 8.82)
Vietnam	Ba Ria-Vung Tau	0.00 (0.00, 0.00)
Vietnam	Bac Giang	0.00 (0.00, 0.00)
Vietnam	Bac Kan	7.89 (0.2, 56.03)
Vietnam	Bac Lieu	14.9 (3.63, 51.92)
Vietnam	Bac Ninh	0.00 (0.00, 0.00)
Vietnam	Ben Tre	9.43 (0.15, 67.92)
Vietnam	Binh Dinh	0.00 (0.00, 0.00)
Vietnam	Binh Duong	14.67 (0.47, 74.26)
Vietnam	Binh Phuoc	0.00 (0.00, 0.00)
Vietnam	Binh Thuan	0.00 (0.00, 0.00)
Vietnam	Ca Mau	0.00 (0.00, 0.00)
Vietnam	Can Tho	0.00 (0.00, 0.00)
Vietnam	Cao Bang	0.00 (0.00, 0.00)
Vietnam	Da Nang City	0.00 (0.00, 0.00)
Vietnam	Dac Lac	0.00 (0.00, 0.00)
Vietnam	Dac Nong	0.00 (0.00, 0.00)
Vietnam	Dien Bien	0.00 (0.00, 0.00)
Vietnam	Dong Nai	0.00 (0.00, 0.00)
Vietnam	Dong Thap	0.00 (0.00, 0.00)
Vietnam	Gia Lai	13.79 (1.78, 61.84)
Vietnam	Ha Giang	0.00 (0.00, 0.00)
Vietnam	Ha Nam	0.00 (0.00, 0.00)
Vietnam	Ha Noi City	0.00 (0.00, 0.00)
Vietnam	Ha Tinh	0.00 (0.00, 0.00)
Vietnam	Hai Duong	0.00 (0.00, 0.00)
Vietnam	Hai Phong City	0.00 (0.00, 0.00)
Vietnam	Hau Giang	0.00 (0.00, 0.00)
Vietnam	Ho Chi Minh City	0.00 (0.00, 0.00)
Vietnam	Hoa Binh	0.00 (0.00, 0.00)
Vietnam	Hung Yen	0.00 (0.00, 0.00)
Vietnam	Khanh Hoa	0.00 (0.00, 0.00)
Vietnam	Kien Giang	0.00 (0.00, 0.00)
Vietnam	Kon Tum	8.92 (0.24, 64.81)
Vietnam	Lai Chau	0.00 (0.00, 0.00)
Vietnam	Lam Dong	0.00 (0.00, 0.00)
Vietnam	Lang Son	0.00 (0.00, 0.00)
Vietnam	Lao Cai	0.00 (0.00, 0.00)
Vietnam	Long An	0.00 (0.00, 0.00)
Vietnam	Nam Dinh	0.00 (0.00, 0.00)
Vietnam	Nghe An	0.00 (0.00, 0.00)
Vietnam	Ninh Binh	0.00 (0.00, 0.00)
Vietnam	Ninh Thuan	0.00 (0.00, 0.00)
Vietnam	Phu Tho	0.00 (0.00, 0.00)
Vietnam	Phu Yen	46.22 (11.71, 79.77)
Vietnam	Quang Binh	0.00 (0.00, 0.00)
Vietnam	Quang Nam	4.95 (0.22, 39.74)
Vietnam	Quang Ngai	9.53 (0.26, 76.10)
Vietnam	Quang Ninh	0.00 (0.00, 0.00)
Vietnam	Quang Tri	0.00 (0.00, 0.00)
Vietnam	Soc Trang	0.00 (0.00, 0.00)
Vietnam	Son La	0.00 (0.00, 0.00)
Vietnam	Tay Ninh	7.35 (0.09, 72.87)
Vietnam	Thai Binh	0.00 (0.00, 0.00)
Vietnam	Thai Nguyen	0.00 (0.00, 0.00)
Vietnam	Thanh Hoa	4.43 (0.07, 68.34)
Vietnam	Thua Thien - Hue	0.00 (0.00, 0.00)
Vietnam	Tien Giang	0.00 (0.00, 0.00)
Vietnam	Tra Vinh	0.00 (0.00, 0.00)
Vietnam	Tuyen Quang	0.00 (0.00, 0.00)
Vietnam	Vinh Long	0.00 (0.00, 0.00)
Vietnam	Vinh Phuc	0.00 (0.00, 0.00)
Vietnam	Yen Bai	0.00 (0.00, 0.00)
