# Supplementary material for: Model-based spatial-temporal mapping of opisthorchiasis in endemic countries of Southeast Asia
Source: eLife. 2021 Jan 12;10:e59755. doi: 10.7554/eLife.59755 (PMC7870142; doi:10.7554/eLife.59755)
Supplement: Figure 6—figure supplement 9—source data 1. [file elife-59755-fig6-figsupp9-data1.xlsx]

## Sheet: Predicted prevalence
Country	Administrative division of level one	Predicted prevalence of 1978
Cambodia	Banteay Meancheay	12.81 (0.27, 67.28)
Cambodia	Battambang	14.95 (0.81, 68.52)
Cambodia	Kampong Speu	10.37 (0.10, 78.8)
Cambodia	Kampong Thom	15.63 (0.18, 77.8)
Cambodia	Kampot	6.59 (0.09, 68.31)
Cambodia	Kandal	17.56 (0.27, 86.68)
Cambodia	Keb	11.9 (0.52, 60.48)
Cambodia	Koh Kong	13.05 (0.24, 77.42)
Cambodia	Kompong Cham	14.62 (0.46, 59.89)
Cambodia	Kompong Chnang	2.43 (0.00, 90.73)
Cambodia	Kratie	10.87 (0.25, 64.06)
Cambodia	Krong Pailin	8.4 (0.05, 84.72)
Cambodia	Mondul Kiri	5 (0.02, 83.82)
Cambodia	Otdar Mean Chey	10.42 (0.41, 58.75)
Cambodia	Pailin	23.22 (1.34, 73.35)
Cambodia	Phnom Penh	7.88 (0.02, 95.42)
Cambodia	Pouthisat	9.43 (0.25, 66.85)
Cambodia	Preah Vihear	17.74 (1.06, 66.78)
Cambodia	Prey Veaeng	11.8 (0.13, 73.04)
Cambodia	Ratana Kiri	9.28 (0.23, 74.02)
Cambodia	Siem Reap	13.78 (0.5, 63.39)
Cambodia	Stung Treng	10.40 (0.45, 66.02)
Cambodia	Svay Rieng	9.37 (0.07, 72.03)
Cambodia	Takeo	14.99 (0.13, 86.41)
Cambodia	Tbong Khmum	13.38 (0.21, 75.04)
Laos	Attopu	11.03 (0.30, 76.80)
Laos	Bokeo	10.07 (0.36, 60.69)
Laos	Bolikhamsai	22.52 (2.62, 56.85)
Laos	Champassack	29.52 (2.21, 74.11)
Laos	Huaphanh	8.25 (0.41, 44.22)
Laos	Khammouane	31.40 (6.04, 75.36)
Laos	Louang Namtha	8.27 (0.18, 55.67)
Laos	Louangphrabang	14.37 (0.86, 56.14)
Laos	Oudomsay	11.90 (0.48, 59.93)
Laos	Phongsaly	17.19 (0.89, 61.58)
Laos	Salavane	3.47 (0.10, 34.29)
Laos	Saysomboune	23.16 (2.89, 66.9)
Laos	Sekong	44.02 (5.25, 87.63)
Laos	Svannakhet	59.68 (16.88, 89.42)
Laos	Vientiane	4.21 (0.11, 49.14)
Laos	Vientiane [prefecture]	29.7 (6.35, 59.95)
Laos	Xaignabouri	22.87 (0.67, 73.47)
Laos	Xiangkhoang	8.08 (0.21, 60.76)
Thailand	Amnat Charoen	39.26 (14.43, 70.11)
Thailand	Ang Thong	12.4 (2.37, 37.52)
Thailand	Bangkok Metropolis	13.16 (3.10, 43.64)
Thailand	Bueng Kan	35.55 (12.79, 67.73)
Thailand	Buri Ram	44 (22.5, 65.84)
Thailand	Chachoengsao	17.56 (4.81, 50.25)
Thailand	Chai Nat	15.99 (2.96, 45.86)
Thailand	Chaiyaphum	36.89 (18.73, 59.91)
Thailand	Chanthaburi	18.86 (4.16, 49.14)
Thailand	Chiang Mai	19.98 (6.97, 47.6)
Thailand	Chiang Rai	19.3 (5.56, 44.57)
Thailand	Chon Buri	16.99 (3.84, 46.09)
Thailand	Chumphon	9.27 (1.40, 39.34)
Thailand	Kalasin	43.35 (20.76, 66.91)
Thailand	Kamphaeng Phet	15.91 (4.77, 39.09)
Thailand	Kanchanaburi	20.58 (5.72, 53.93)
Thailand	Khon Kaen	51.45 (39.06, 64.68)
Thailand	Krabi	8.16 (1.30, 30.77)
Thailand	Lampang	17.99 (6.79, 48.09)
Thailand	Lamphun	16.90 (4.93, 50.90)
Thailand	Loei	41.00 (19.06, 65.60)
Thailand	Lop Buri	18.52 (4.24, 48.29)
Thailand	Mae Hong Son	20.76 (6.45, 44.02)
Thailand	Maha Sarakham	34.91 (14.29, 68.21)
Thailand	Mukdahan	38.60 (13.71, 72.56)
Thailand	Nakhon Nayok	16.37 (3.02, 47.82)
Thailand	Nakhon Pathom	17.20 (3.57, 45.34)
Thailand	Nakhon Phanom	35.18 (15.01, 67.11)
Thailand	Nakhon Ratchasima	32.36 (14.42, 58.41)
Thailand	Nakhon Sawan	31.85 (12.58, 55.79)
Thailand	Nakhon Si Thammarat	10.18 (1.78, 33.83)
Thailand	Nan	20.50 (5.58, 46.74)
Thailand	Narathiwat	8.64 (1.04, 34.58)
Thailand	Nong Bua Lam Phu	48.08 (20.43, 76.76)
Thailand	Nong Khai	41.15 (19.05, 64.27)
Thailand	Nonthaburi	14.01 (3.36, 42.99)
Thailand	Pathum Thani	16.44 (4.90, 44.46)
Thailand	Pattani	6.37 (0.73, 36.72)
Thailand	Phangnga	7.55 (1.18, 31.11)
Thailand	Phatthalung	8.78 (1.22, 40.16)
Thailand	Phayao	18.13 (4.38, 40.90)
Thailand	Phetchabun	23.45 (7.94, 44.55)
Thailand	Phetchaburi	16.38 (3.03, 63.49)
Thailand	Phichit	39.25 (30.89, 46.29)
Thailand	Phitsanulok	15.38 (10.21, 23.08)
Thailand	Phra Nakhon Si Ayutthaya	16.66 (3.83, 46.34)
Thailand	Phrae	15.91 (3.71, 45.02)
Thailand	Phuket	4.25 (0.48, 29.12)
Thailand	Prachin Buri	16.04 (4.27, 42.49)
Thailand	Prachuap Khiri Khan	11.25 (2.12, 31.56)
Thailand	Ranong	9.43 (1.08, 37.32)
Thailand	Ratchaburi	17.34 (3.46, 56.17)
Thailand	Rayong	14.54 (3.21, 43.38)
Thailand	Roi Et	39.92 (16.83, 68.00)
Thailand	Sa Kaeo	17.52 (4.94, 44.17)
Thailand	Sakon Nakhon	34.17 (14.76, 60.71)
Thailand	Samut Prakan	14.01 (3.10, 48.74)
Thailand	Samut Sakhon	15.34 (2.70, 40.63)
Thailand	Samut Songkhram	13.10 (2.45, 47.73)
Thailand	Saraburi	16.50 (3.83, 44.46)
Thailand	Satun	7.32 (1.11, 26.00)
Thailand	Si Sa Ket	38.87 (20.11, 63.77)
Thailand	Sing Buri	12.78 (2.87, 41.28)
Thailand	Songkhla	7.81 (1.20, 39.89)
Thailand	Sukhothai	20.26 (5.08, 46.51)
Thailand	Suphan Buri	17.71 (4.11, 45.00)
Thailand	Surat Thani	10.45 (1.78, 37.99)
Thailand	Surin	41.99 (21.00, 66.57)
Thailand	Tak	20.25 (5.39, 50.07)
Thailand	Trang	7.28 (1.13, 30.74)
Thailand	Trat	16.07 (2.84, 47.90)
Thailand	Ubon Ratchathani	36.98 (14.28, 63.36)
Thailand	Udon Thani	41.62 (22.41, 64.91)
Thailand	Uthai Thani	19.61 (4.03, 50.72)
Thailand	Uttaradit	11.66 (3.32, 38.90)
Thailand	Yala	6.55 (1.18, 28.02)
Thailand	Yasothon	39.49 (16.74, 65.97)
Vietnam	An Giang	2.04 (0.01, 71.92)
Vietnam	Ba Ria-Vung Tau	0.00 (0.00, 0.00)
Vietnam	Bac Giang	0.00 (0.00, 0.00)
Vietnam	Bac Kan	8.69 (0.17, 64.68)
Vietnam	Bac Lieu	13.88 (0.76, 65.99)
Vietnam	Bac Ninh	0.00 (0.00, 0.00)
Vietnam	Ben Tre	10.21 (0.09, 78.74)
Vietnam	Binh Dinh	0.00 (0.00, 0.00)
Vietnam	Binh Duong	14.32 (0.36, 78.60)
Vietnam	Binh Phuoc	0.00 (0.00, 0.00)
Vietnam	Binh Thuan	0.00 (0.00, 0.00)
Vietnam	Ca Mau	0.00 (0.00, 0.00)
Vietnam	Can Tho	0.00 (0.00, 0.00)
Vietnam	Cao Bang	0.00 (0.00, 0.00)
Vietnam	Da Nang City	0.00 (0.00, 0.00)
Vietnam	Dac Lac	0.00 (0.00, 0.00)
Vietnam	Dac Nong	0.00 (0.00, 0.00)
Vietnam	Dien Bien	0.00 (0.00, 0.00)
Vietnam	Dong Nai	0.00 (0.00, 0.00)
Vietnam	Dong Thap	0.00 (0.00, 0.00)
Vietnam	Gia Lai	12.82 (0.88, 62.85)
Vietnam	Ha Giang	0.00 (0.00, 0.00)
Vietnam	Ha Nam	0.00 (0.00, 0.00)
Vietnam	Ha Noi City	0.00 (0.00, 0.00)
Vietnam	Ha Tinh	0.00 (0.00, 0.00)
Vietnam	Hai Duong	0.00 (0.00, 0.00)
Vietnam	Hai Phong City	0.00 (0.00, 0.00)
Vietnam	Hau Giang	0.00 (0.00, 0.00)
Vietnam	Ho Chi Minh City	0.00 (0.00, 0.00)
Vietnam	Hoa Binh	0.00 (0.00, 0.00)
Vietnam	Hung Yen	0.00 (0.00, 0.00)
Vietnam	Khanh Hoa	0.00 (0.00, 0.00)
Vietnam	Kien Giang	0.00 (0.00, 0.00)
Vietnam	Kon Tum	8.02 (0.16, 74.11)
Vietnam	Lai Chau	0.00 (0.00, 0.00)
Vietnam	Lam Dong	0.00 (0.00, 0.00)
Vietnam	Lang Son	0.00 (0.00, 0.00)
Vietnam	Lao Cai	0.00 (0.00, 0.00)
Vietnam	Long An	0.00 (0.00, 0.00)
Vietnam	Nam Dinh	0.00 (0.00, 0.00)
Vietnam	Nghe An	0.00 (0.00, 0.00)
Vietnam	Ninh Binh	0.00 (0.00, 0.00)
Vietnam	Ninh Thuan	0.00 (0.00, 0.00)
Vietnam	Phu Tho	0.00 (0.00, 0.00)
Vietnam	Phu Yen	23.19 (0.68, 83.84)
Vietnam	Quang Binh	0.00 (0.00, 0.00)
Vietnam	Quang Nam	9.33 (0.20, 61.26)
Vietnam	Quang Ngai	11.44 (0.14, 77.15)
Vietnam	Quang Ninh	0.00 (0.00, 0.00)
Vietnam	Quang Tri	0.00 (0.00, 0.00)
Vietnam	Soc Trang	0.00 (0.00, 0.00)
Vietnam	Son La	0.00 (0.00, 0.00)
Vietnam	Tay Ninh	9.53 (0.09, 71.68)
Vietnam	Thai Binh	0.00 (0.00, 0.00)
Vietnam	Thai Nguyen	0.00 (0.00, 0.00)
Vietnam	Thanh Hoa	5.52 (0.07, 75.57)
Vietnam	Thua Thien - Hue	0.00 (0.00, 0.00)
Vietnam	Tien Giang	0.00 (0.00, 0.00)
Vietnam	Tra Vinh	0.00 (0.00, 0.00)
Vietnam	Tuyen Quang	0.00 (0.00, 0.00)
Vietnam	Vinh Long	0.00 (0.00, 0.00)
Vietnam	Vinh Phuc	0.00 (0.00, 0.00)
Vietnam	Yen Bai	0.00 (0.00, 0.00)
