# Supplementary material for: Model-based spatial-temporal mapping of opisthorchiasis in endemic countries of Southeast Asia
Source: eLife. 2021 Jan 12;10:e59755. doi: 10.7554/eLife.59755 (PMC7870142; doi:10.7554/eLife.59755)
Supplement: Figure 6—source data 1. [file elife-59755-fig6-data1.xlsx]

## Sheet: Predicted prevalence
Year	Country	Lower prevelance (%)	Median prevelance (%)	Upper prevelance (%)
1978	Cambodia	6.11854	18.1079	46.4784
1978	Laos	16.0285	27.0575	39.6272
1978	Thailand	19.637	23.2149	29.1474
1978	Vietnam	1.1372	2.88044	5.93783
1978	Total	10.2952	12.9018	16.015
1979	Cambodia	6.08084	17.9831	46.2384
1979	Laos	16.0734	26.9761	39.4971
1979	Thailand	19.5149	22.9275	28.5722
1979	Vietnam	1.10795	2.87954	5.89483
1979	Total	10.1825	12.7253	15.7635
1980	Cambodia	5.95086	17.4946	46.0682
1980	Laos	16.1892	26.9473	39.2725
1980	Thailand	18.9972	21.941	26.8608
1980	Vietnam	1.08344	2.82625	5.77231
1980	Total	9.83153	12.2917	15.4538
1981	Cambodia	5.64093	17.0287	45.3252
1981	Laos	16.4075	26.8949	38.9535
1981	Thailand	18.2021	20.5921	24.4618
1981	Vietnam	1.08426	2.73704	5.59401
1981	Total	9.42504	11.6584	14.7511
1982	Cambodia	4.91146	16.8059	44.0526
1982	Laos	16.9955	27.0712	38.9134
1982	Thailand	16.7936	19.178	22.2808
1982	Vietnam	1.0674	2.67545	5.29736
1982	Total	8.96205	11.0144	14.1015
1983	Cambodia	5.05676	16.7005	44.2267
1983	Laos	17.5548	27.6217	38.8319
1983	Thailand	15.167	18.0342	21.1187
1983	Vietnam	1.10888	2.64953	5.20346
1983	Total	8.59673	10.5445	13.4541
1984	Cambodia	4.91641	16.8577	43.6492
1984	Laos	17.8793	28.2734	38.9694
1984	Thailand	14.1763	17.4466	21.0372
1984	Vietnam	1.1607	2.64304	5.26313
1984	Total	8.35174	10.4135	13.3209
1985	Cambodia	4.79165	16.8062	42.6436
1985	Laos	19.1888	28.423	39.3358
1985	Thailand	13.838	17.322	21.2847
1985	Vietnam	1.14742	2.69565	5.21649
1985	Total	8.22599	10.3701	13.373
1986	Cambodia	4.82929	16.5885	41.6827
1986	Laos	19.7759	28.6959	39.5355
1986	Thailand	13.7534	17.2218	21.0994
1986	Vietnam	1.2218	2.71702	5.11264
1986	Total	8.21251	10.3481	13.2906
1987	Cambodia	4.74381	16.498	40.2643
1987	Laos	19.1206	28.5152	38.5959
1987	Thailand	13.8654	17.1307	20.7604
1987	Vietnam	1.29143	2.72777	5.04174
1987	Total	8.2259	10.3164	13.0301
1988	Cambodia	4.98837	15.9078	39.6236
1988	Laos	19.5284	28.1596	37.6708
1988	Thailand	14.5374	17.3533	20.2274
1988	Vietnam	1.39592	2.7167	4.87491
1988	Total	8.41332	10.3042	12.8603
1989	Cambodia	4.74511	15.9861	40.2373
1989	Laos	18.9067	27.4	37.1474
1989	Thailand	15.4673	17.9167	20.5246
1989	Vietnam	1.43139	2.75292	4.87169
1989	Total	8.61794	10.4937	13.0828
1990	Cambodia	4.79884	16.2285	38.9745
1990	Laos	18.0822	25.5014	35.4938
1990	Thailand	16.0737	18.4937	21.06
1990	Vietnam	1.47052	2.75561	4.98377
1990	Total	8.74173	10.6365	13.2022
1991	Cambodia	4.8226	16.049	38.3934
1991	Laos	15.9724	22.7721	32.0481
1991	Thailand	16.1833	18.8353	21.8665
1991	Vietnam	1.46981	2.78205	4.97309
1991	Total	8.7054	10.7043	13.0811
1992	Cambodia	4.88634	15.6018	36.2661
1992	Laos	13.5819	19.9005	27.6635
1992	Thailand	15.9842	19.0487	23.0774
1992	Vietnam	1.44156	2.70823	4.87177
1992	Total	8.67436	10.657	13.0432
1993	Cambodia	5.4107	15.2265	33.8854
1993	Laos	11.6169	17.07	23.7079
1993	Thailand	15.4531	19.5631	26.0402
1993	Vietnam	1.37724	2.66648	4.76635
1993	Total	8.37648	10.6798	13.4437
1994	Cambodia	5.54462	14.6992	32.3988
1994	Laos	10.3686	15.3502	21.7697
1994	Thailand	14.9715	20.2645	29.533
1994	Vietnam	1.32267	2.61762	4.59883
1994	Total	8.21164	10.7089	14.2755
1995	Cambodia	5.577	13.9509	29.4047
1995	Laos	10.2147	14.5474	20.7321
1995	Thailand	14.8021	20.6537	32.0047
1995	Vietnam	1.27984	2.55822	4.6078
1995	Total	8.10358	10.7806	14.6359
1996	Cambodia	5.04391	12.3938	25.0676
1996	Laos	9.96591	14.1234	19.6881
1996	Thailand	14.6715	20.6261	31.8267
1996	Vietnam	1.21164	2.51426	4.6383
1996	Total	7.85152	10.5221	14.3883
1997	Cambodia	4.33813	10.4969	21.0502
1997	Laos	10.3075	14.0839	19.281
1997	Thailand	14.6285	19.9803	29.5731
1997	Vietnam	1.12402	2.40554	4.45117
1997	Total	7.67893	10.0794	13.7278
1998	Cambodia	3.41802	8.8803	18.1478
1998	Laos	11.1729	14.7753	19.4966
1998	Thailand	14.5034	18.8522	26.6347
1998	Vietnam	0.992615	2.31422	4.29107
1998	Total	7.56257	9.49451	12.6486
1999	Cambodia	3.04931	7.62097	15.6162
1999	Laos	13.5167	17.0623	21.5558
1999	Thailand	14.5843	18.1242	23.7937
1999	Vietnam	0.935182	2.32385	4.21383
1999	Total	7.58346	9.21702	11.6876
2000	Cambodia	2.96065	7.3318	14.3871
2000	Laos	17.6038	21.3955	26.4543
2000	Thailand	14.6792	17.5359	22.1797
2000	Vietnam	0.920796	2.36869	4.50211
2000	Total	7.60956	9.08845	11.2035
2001	Cambodia	3.08311	7.29443	13.5506
2001	Laos	22.6917	26.7908	31.6746
2001	Thailand	14.284	16.8725	20.8283
2001	Vietnam	0.94496	2.40717	4.6872
2001	Total	7.66196	9.06982	10.9696
2002	Cambodia	3.38025	7.76368	13.4756
2002	Laos	27.899	32.0798	36.4266
2002	Thailand	13.5649	16.1804	19.6409
2002	Vietnam	0.955363	2.42982	4.79374
2002	Total	7.69425	9.05264	10.8635
2003	Cambodia	4.97605	8.90735	14.0135
2003	Laos	32.9306	37.022	41.1574
2003	Thailand	12.8833	15.5739	18.6458
2003	Vietnam	1.02025	2.51422	4.80915
2003	Total	7.78752	9.15318	11.0139
2004	Cambodia	6.42459	10.5274	15.6432
2004	Laos	36.6727	41.1688	45.0936
2004	Thailand	12.6638	15.3218	18.4758
2004	Vietnam	1.07892	2.64856	4.9011
2004	Total	7.91053	9.43882	11.3814
2005	Cambodia	7.47776	11.8586	17.495
2005	Laos	38.8967	43.7359	47.5791
2005	Thailand	12.392	15.1328	18.3217
2005	Vietnam	1.1099	2.73364	4.96241
2005	Total	8.07229	9.60715	11.484
2006	Cambodia	8.23006	12.6179	19.4596
2006	Laos	39.816	44.6058	48.4569
2006	Thailand	12.1366	14.6369	17.7898
2006	Vietnam	1.12415	2.7639	4.86307
2006	Total	8.11715	9.52957	11.3806
2007	Cambodia	8.46942	12.8278	20.4181
2007	Laos	39.4405	43.7715	47.5623
2007	Thailand	11.7436	13.8911	16.4513
2007	Vietnam	1.12381	2.68514	4.67412
2007	Total	7.93456	9.2211	10.9013
2008	Cambodia	8.12774	12.6079	21.5059
2008	Laos	37.0641	40.856	44.2848
2008	Thailand	11.2219	13.0721	15.1845
2008	Vietnam	1.06395	2.59134	4.43886
2008	Total	7.52804	8.74037	10.2021
2009	Cambodia	7.45365	11.9681	21.3361
2009	Laos	33.8539	37.1967	40.4791
2009	Thailand	10.7887	12.4425	14.2584
2009	Vietnam	0.997145	2.51044	4.19008
2009	Total	7.10203	8.29541	9.76932
2010	Cambodia	6.35686	10.3313	18.9791
2010	Laos	31.4205	34.6393	37.9269
2010	Thailand	10.2771	11.9083	13.6427
2010	Vietnam	0.921434	2.38233	4.1823
2010	Total	6.67583	7.80457	9.22637
2011	Cambodia	5.25187	8.34433	14.9477
2011	Laos	29.9729	33.1339	36.4069
2011	Thailand	9.61828	11.2435	12.9028
2011	Vietnam	0.932218	2.31055	4.18371
2011	Total	6.23206	7.28039	8.5643
2012	Cambodia	4.22861	6.66186	10.9573
2012	Laos	29.3121	32.6028	35.9793
2012	Thailand	9.01474	10.4585	12.1931
2012	Vietnam	0.903683	2.19877	3.97051
2012	Total	5.81102	6.77321	7.95616
2013	Cambodia	3.37903	5.69211	8.76621
2013	Laos	29.2554	32.9862	37.0368
2013	Thailand	8.35039	9.68016	11.4403
2013	Vietnam	0.867309	2.10229	4.01928
2013	Total	5.42028	6.3697	7.45507
2014	Cambodia	2.83554	5.37094	9.23715
2014	Laos	29.3861	33.7788	38.5877
2014	Thailand	7.88146	9.33828	11.0236
2014	Vietnam	0.77802	2.05838	4.1156
2014	Total	5.22588	6.22798	7.3702
2015	Cambodia	2.64498	5.54584	9.91168
2015	Laos	28.8353	34.4964	39.6661
2015	Thailand	7.79354	9.324	11.2771
2015	Vietnam	0.74496	2.06713	4.20619
2015	Total	5.16521	6.29387	7.52279
2016	Cambodia	2.4455	5.84476	11.0186
2016	Laos	28.5314	34.8685	40.2259
2016	Thailand	7.89397	9.49305	11.713
2016	Vietnam	0.732322	2.10312	4.33294
2016	Total	5.23363	6.39706	7.74664
2017	Cambodia	2.41687	6.08873	11.5609
2017	Laos	28.4987	35.1214	40.5833
2017	Thailand	7.94467	9.64775	12.0329
2017	Vietnam	0.7298	2.13391	4.39131
2017	Total	5.31752	6.51633	7.91634
2018	Cambodia	2.40618	6.14979	11.7299
2018	Laos	28.4957	35.2075	40.7018
2018	Thailand	7.97954	9.70687	12.1714
2018	Vietnam	0.729565	2.15067	4.40238
2018	Total	5.35141	6.56505	7.98008
